# Supplementary material
Source: PubMed Central journal article supplement (PMC4828293)
Supplement: NIHMS740025-supplement-Supplementary_Data_File.pdf [file NIHMS740025-supplement-Supplementary_Data_File.pdf]

# Structural Interrogation of Benzosuberene-Based Inhibitors of Tubulin Polymerization

Christine A. Herdman<sup>a</sup>, Laxman Devkota<sup>a</sup>, Chen-Ming Lin<sup>a</sup>, Haichan Niu<sup>a</sup>, Tracy E. Strecker<sup>a</sup>, Ramona Lopez<sup>b</sup>, Li Liu<sup>b</sup>, Clinton S. George<sup>a</sup>, Rajendra P. Tanpure<sup>a</sup>, Ernest Hamel<sup>c</sup>, David J. Chaplin<sup>a,d</sup>, Ralph P. Mason<sup>b</sup>, Mary Lynn Trawick<sup>a</sup>, and Kevin G. Pinney<sup>a\*</sup>

<sup>a</sup> Department of Chemistry and Biochemistry, Baylor University, One Bear Place #97348, Waco, Texas 76798-7348, United States

<sup>b</sup> Department of Radiology, The University of Texas Southwestern Medical Center, 5323 Harry Hines Boulevard, Dallas, Texas 75390-9058, United States

<sup>c</sup> Screening Technologies Branch, Developmental Therapeutics Program, Division of Cancer Treatment and Diagnosis, National Cancer Institute, Frederick National Laboratory for Cancer Research, National Institutes of Health, Frederick, MD 21702, United States

<sup>d</sup> OXiGENE Inc., 701 Gateway Boulevard, Suite 210, South San Francisco, California 94080, United States

\*Corresponding author. Tel.: +1 254 710 4117; fax: +1 254 710 4272.

E-mail address: [Kevin\\_Pinney@baylor.edu](mailto:Kevin_Pinney@baylor.edu) (K.G. Pinney).

## Supplementary Data Table of Contents

|                                                                                                                |                 |
|----------------------------------------------------------------------------------------------------------------|-----------------|
| <b><sup>1</sup>H NMR and <sup>13</sup>C NMR of 2-(2,3-dimethoxyphenyl)-4,4-dimethyl-4,5-dihydrooxazole</b>     | <b>S1</b>       |
| <b><sup>1</sup>H NMR and <sup>13</sup>C NMR of 2-(2-butyl-3-methoxyphenyl)-4,4-dimethyl-4,5-dihydrooxazole</b> | <b>S2</b>       |
| <b><sup>1</sup>H NMR and <sup>13</sup>C NMR of 2-butyl-3-methoxybenzoic acid</b>                               | <b>S3</b>       |
| <b><sup>1</sup>H NMR and <sup>13</sup>C NMR of (2-butyl-3-methoxyphenyl)methanol</b>                           | <b>S4</b>       |
| <b><sup>1</sup>H NMR and <sup>13</sup>C NMR of 2-butyl-3-methoxybenzaldehyde</b>                               | <b>S5</b>       |
| <b><sup>1</sup>H NMR and <sup>13</sup>C NMR of compound 6</b>                                                  | <b>S6</b>       |
| <b><sup>1</sup>H NMR and <sup>13</sup>C NMR of compound 7</b>                                                  | <b>S7-S8</b>    |
| <b><sup>1</sup>H NMR and <sup>13</sup>C NMR of compound 8</b>                                                  | <b>S9-S10</b>   |
| <b><sup>1</sup>H NMR and <sup>13</sup>C NMR of 2-methyl-3-methoxy benzaldehyde</b>                             | <b>S11-S12</b>  |
| <b><sup>1</sup>H NMR and <sup>13</sup>C NMR of compound 9</b>                                                  | <b>S13-S124</b> |
| <b><sup>1</sup>H NMR and <sup>13</sup>C NMR of 2-Ethyl-3-methoxy benzaldehyde</b>                              | <b>S15-S16</b>  |
| <b><sup>1</sup>H NMR and <sup>13</sup>C NMR of compound 10</b>                                                 | <b>S17-S18</b>  |
| <b><sup>1</sup>H NMR and <sup>13</sup>C NMR of 2-propyl-3-methoxy benzaldehyde</b>                             | <b>S19-S20</b>  |
| <b><sup>1</sup>H NMR and <sup>13</sup>C NMR of compound 11</b>                                                 | <b>S21-S22</b>  |
| <b><sup>1</sup>H NMR and <sup>13</sup>C NMR of compound 12</b>                                                 | <b>S23</b>      |
| <b><sup>1</sup>H NMR and <sup>13</sup>C NMR of compound 13</b>                                                 | <b>S24-S25</b>  |
| <b><sup>1</sup>H NMR and <sup>13</sup>C NMR of compound 14</b>                                                 | <b>S26-S27</b>  |
| <b><sup>1</sup>H NMR and <sup>13</sup>C NMR of compound 15</b>                                                 | <b>S28-S29</b>  |
| <b><sup>1</sup>H NMR and <sup>13</sup>C NMR of compound 16</b>                                                 | <b>S30-S31</b>  |
| <b><sup>1</sup>H NMR and <sup>13</sup>C NMR of compound 17</b>                                                 | <b>S32-S33</b>  |
| <b><sup>1</sup>H NMR and <sup>13</sup>C NMR of compound 18</b>                                                 | <b>S34</b>      |
| <b><sup>1</sup>H NMR of compound 24</b>                                                                        | <b>S35</b>      |
| <b><sup>1</sup>H NMR and <sup>13</sup>C NMR of compound 25</b>                                                 | <b>S36-37</b>   |
| <b><sup>1</sup>H NMR and <sup>13</sup>C NMR of compound 26</b>                                                 | <b>S38-S39</b>  |
| <b><sup>1</sup>H NMR and <sup>13</sup>C NMR of compound 26</b>                                                 | <b>S40-S41</b>  |
| <b><sup>1</sup>H NMR, <sup>13</sup>C NMR, HPLC and HRMS of compound 28</b>                                     | <b>S42-S48</b>  |
| <b><sup>1</sup>H NMR, <sup>13</sup>C NMR, HPLC and HRMS</b>                                                    |                 |

|                                                                                                    |                  |
|----------------------------------------------------------------------------------------------------|------------------|
| <b>of compound 29</b>                                                                              | <b>S49-S54</b>   |
| <b><sup>1</sup>H NMR, <sup>13</sup>C NMR, HPLC and HRMS<br/>of compound 30</b>                     | <b>S55-S61</b>   |
| <b><sup>1</sup>H NMR, <sup>13</sup>C NMR, HPLC and HRMS<br/>of compound 31</b>                     | <b>S62-S67</b>   |
| <b><sup>1</sup>H NMR, <sup>13</sup>C NMR, HPLC and HRMS<br/>of compound 32</b>                     | <b>S68-S74</b>   |
| <b><sup>1</sup>H NMR, <sup>13</sup>C NMR, HPLC and HRMS<br/>of compound 33</b>                     | <b>S75-S82</b>   |
| <b><sup>1</sup>H NMR, <sup>13</sup>C NMR, <sup>19</sup>F NMR, HPLC and HRMS<br/>of compound 34</b> | <b>S83-S91</b>   |
| <b><sup>1</sup>H NMR, <sup>13</sup>C NMR, HPLC and HRMS<br/>of compound 35</b>                     | <b>S92-S99</b>   |
| <b><sup>1</sup>H NMR, <sup>13</sup>C NMR, HPLC and HRMS<br/>of compound 36</b>                     | <b>S100-S107</b> |
| <b><sup>1</sup>H NMR, <sup>13</sup>C NMR, HPLC and HRMS<br/>of compound 37</b>                     | <b>S108-S115</b> |
| <b><sup>1</sup>H NMR and <sup>13</sup>C NMR of compound 38</b>                                     | <b>S116-S117</b> |
| <b><sup>1</sup>H NMR and <sup>13</sup>C NMR of compound 39</b>                                     | <b>S118-S119</b> |
| <b><sup>1</sup>H NMR and <sup>13</sup>C NMR of compound 40</b>                                     | <b>S120-S121</b> |
| <b><sup>1</sup>H NMR and <sup>13</sup>C NMR of compound 41</b>                                     | <b>S122-S123</b> |
| <b><sup>1</sup>H NMR and <sup>13</sup>C NMR of compound 42</b>                                     | <b>S124-S125</b> |
| <b><sup>1</sup>H NMR and <sup>13</sup>C NMR of compound 43</b>                                     | <b>S126-S127</b> |
| <b><sup>1</sup>H NMR and <sup>13</sup>C NMR of compound 45</b>                                     | <b>S128-S129</b> |
| <b><sup>1</sup>H NMR and <sup>13</sup>C NMR of compound 46</b>                                     | <b>S130-S131</b> |
| <b><sup>1</sup>H NMR and <sup>13</sup>C NMR of compound 47</b>                                     | <b>S132-S133</b> |
| <b><sup>1</sup>H NMR and <sup>13</sup>C NMR of compound 50</b>                                     | <b>S134-S135</b> |
| <b><sup>1</sup>H NMR and <sup>13</sup>C NMR of compound 51</b>                                     | <b>S136-S137</b> |
| <b><sup>1</sup>H NMR and <sup>13</sup>C NMR of compound 52</b>                                     | <b>S138-S139</b> |
| <b><sup>1</sup>H NMR and <sup>13</sup>C NMR of compound 53</b>                                     | <b>S140-S141</b> |
| <b><sup>1</sup>H NMR and <sup>13</sup>C NMR of compound 54</b>                                     | <b>S142-S143</b> |
| <b><sup>1</sup>H NMR and <sup>13</sup>C NMR of compound 55</b>                                     | <b>S144-S145</b> |
| <b><sup>1</sup>H NMR and <sup>13</sup>C NMR of compound 56</b>                                     | <b>S146-S147</b> |
| <b><sup>1</sup>H NMR and <sup>13</sup>C NMR of compound 57</b>                                     | <b>S148-S149</b> |
| <b><sup>1</sup>H NMR of compound 59</b>                                                            | <b>S150</b>      |
| <b><sup>1</sup>H NMR and <sup>13</sup>C NMR of compound 60</b>                                     | <b>S151-S152</b> |
| <b><sup>1</sup>H NMR, <sup>13</sup>C NMR, HPLC and HRMS<br/>of compound 61</b>                     | <b>S153-S158</b> |

|                                                                                                                        |                  |
|------------------------------------------------------------------------------------------------------------------------|------------------|
| <b><sup>1</sup>H NMR, <sup>13</sup>C NMR, HPLC and HRMS<br/>of compound 62</b>                                         | <b>S159-S164</b> |
| <b><sup>1</sup>H NMR and <sup>13</sup>C NMR of compound 63</b>                                                         | <b>S165-S166</b> |
| <b><sup>1</sup>H NMR, <sup>13</sup>C NMR, HPLC and HRMS<br/>of compound 64</b>                                         | <b>S167-S173</b> |
| <b><sup>1</sup>H NMR, <sup>13</sup>C NMR, <sup>19</sup>F NMR, HPLC and HRMS<br/>of compound 65</b>                     | <b>S174-S183</b> |
| <b><sup>1</sup>H NMR, <sup>13</sup>C NMR, <sup>19</sup>F NMR, HPLC and HRMS<br/>of compound 66</b>                     | <b>S184-S192</b> |
| <b><sup>1</sup>H NMR, <sup>13</sup>C NMR, <sup>19</sup>F NMR, HPLC and HRMS<br/>of compound 67</b>                     | <b>S193-S200</b> |
| <b><sup>1</sup>H NMR, <sup>13</sup>C NMR, HPLC and HRMS<br/>of compound 68</b>                                         | <b>S201-S206</b> |
| <b><sup>1</sup>H NMR and <sup>13</sup>C NMR of compound 69</b>                                                         | <b>S207-S208</b> |
| <b><sup>1</sup>H NMR, <sup>13</sup>C NMR, HPLC and HRMS<br/>of compound 70</b>                                         | <b>S209-S216</b> |
| <b><sup>1</sup>H NMR, <sup>13</sup>C NMR, HPLC and HRMS<br/>of compound 71</b>                                         | <b>S217-S222</b> |
| <b><sup>1</sup>H NMR, <sup>13</sup>C NMR, HPLC and HRMS<br/>of compound 72</b>                                         | <b>S223-S228</b> |
| <b>X-ray crystal structure and data<br/>of compound 72</b>                                                             | <b>S229-S235</b> |
| <b><sup>1</sup>H NMR, <sup>13</sup>C NMR, <sup>31</sup>P NMR, HPLC and HRMS<br/>of compound 73</b>                     | <b>S236-S243</b> |
| <b><sup>1</sup>H NMR, <sup>13</sup>C NMR, <sup>31</sup>P NMR, <sup>19</sup>F NMR,<br/>HPLC and HRMS of compound 74</b> | <b>S244-S254</b> |
| <b>Alternative Synthesis to compound 30</b>                                                                            | <b>S255-S258</b> |
| <b>Table 1 with statistical analysis</b>                                                                               | <b>S259-S260</b> |
| <b>Molecular Docking studies of compounds<br/>29, 62, and 72</b>                                                       | <b>S261-S263</b> |



# 2-(2,3-dimethoxyphenyl)-4,4-dimethyl-4,5-dihydrooxazole

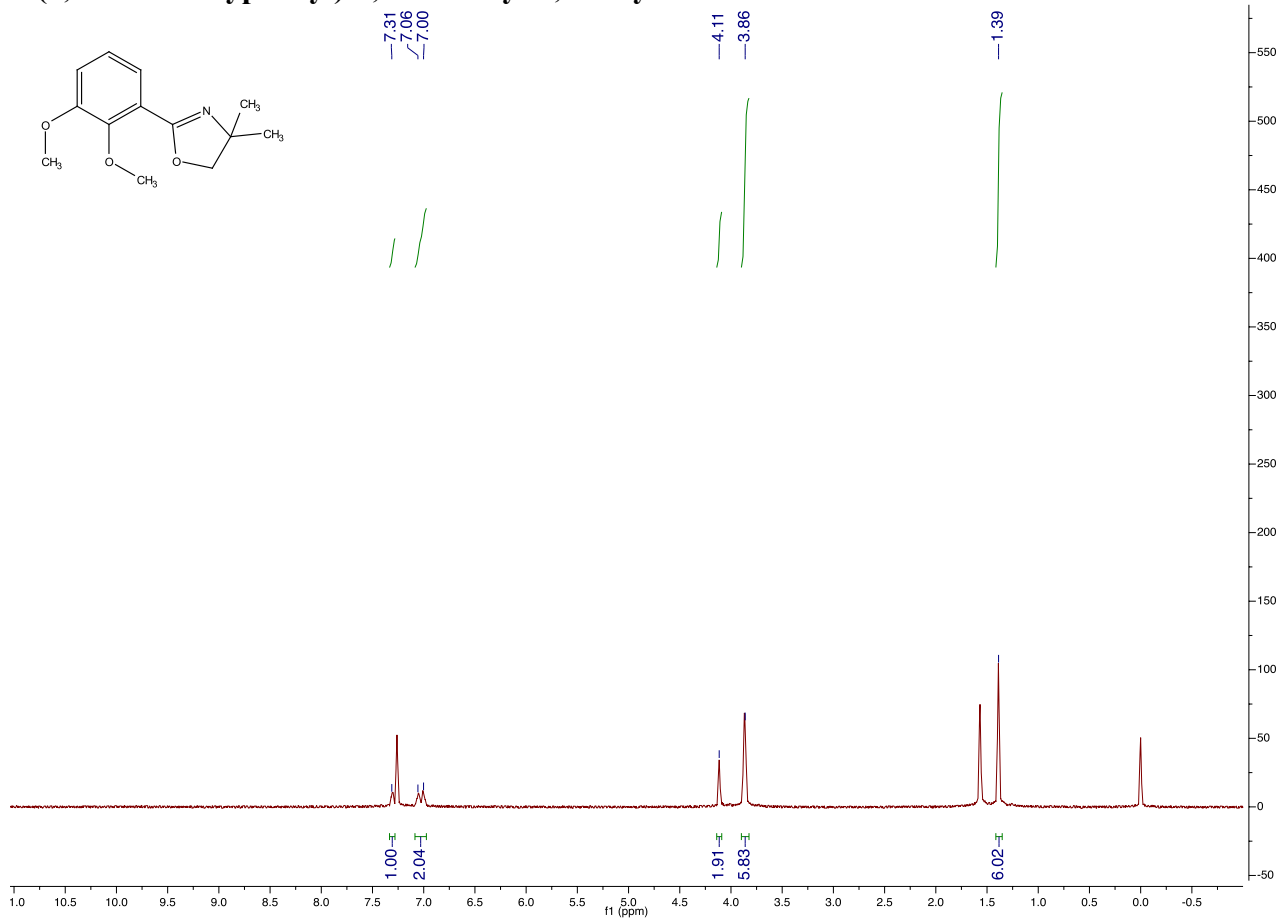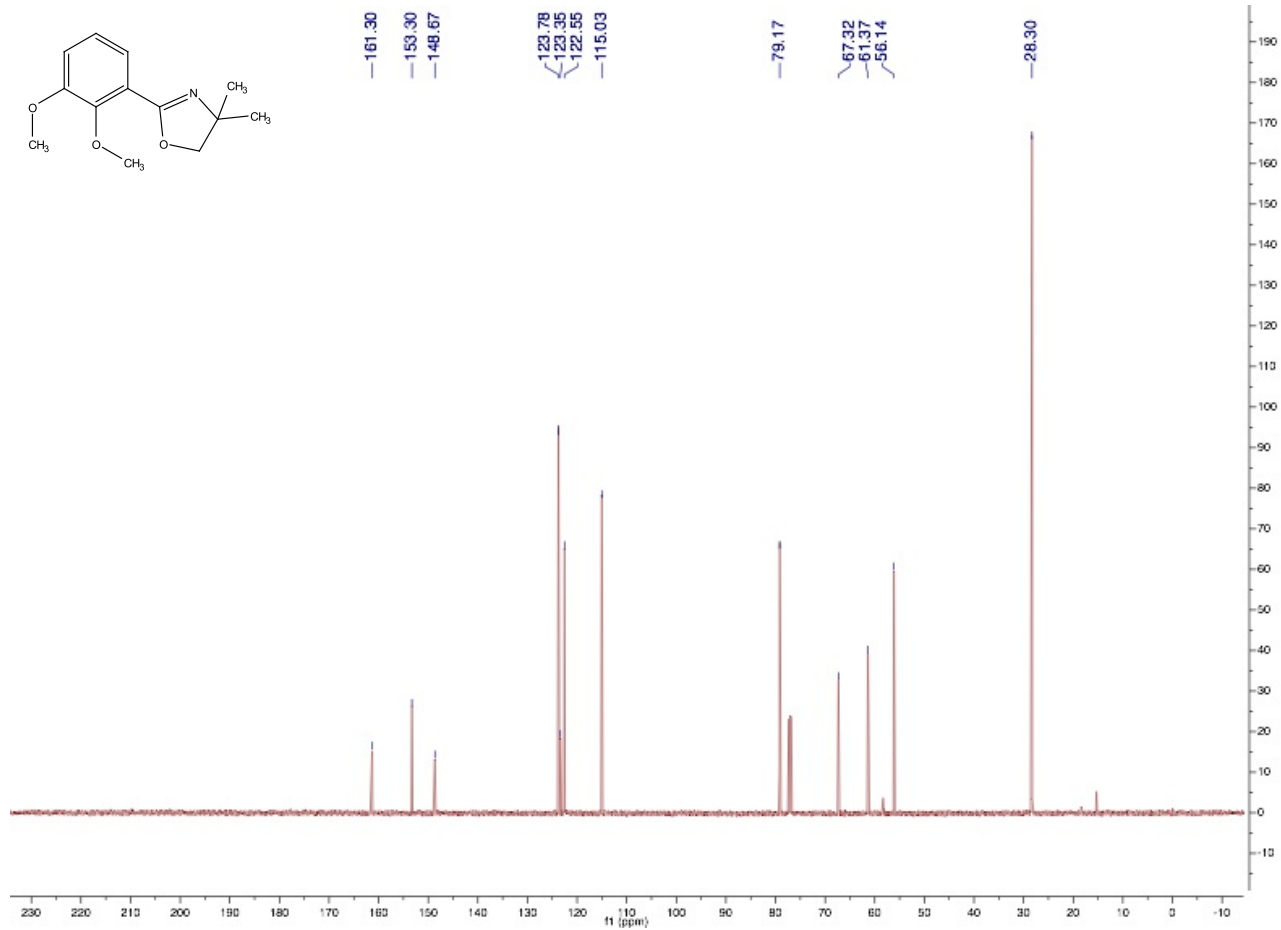

# 2-(2-butyl-3-methoxyphenyl)-4,4-dimethyl-4,5-dihydrooxazole

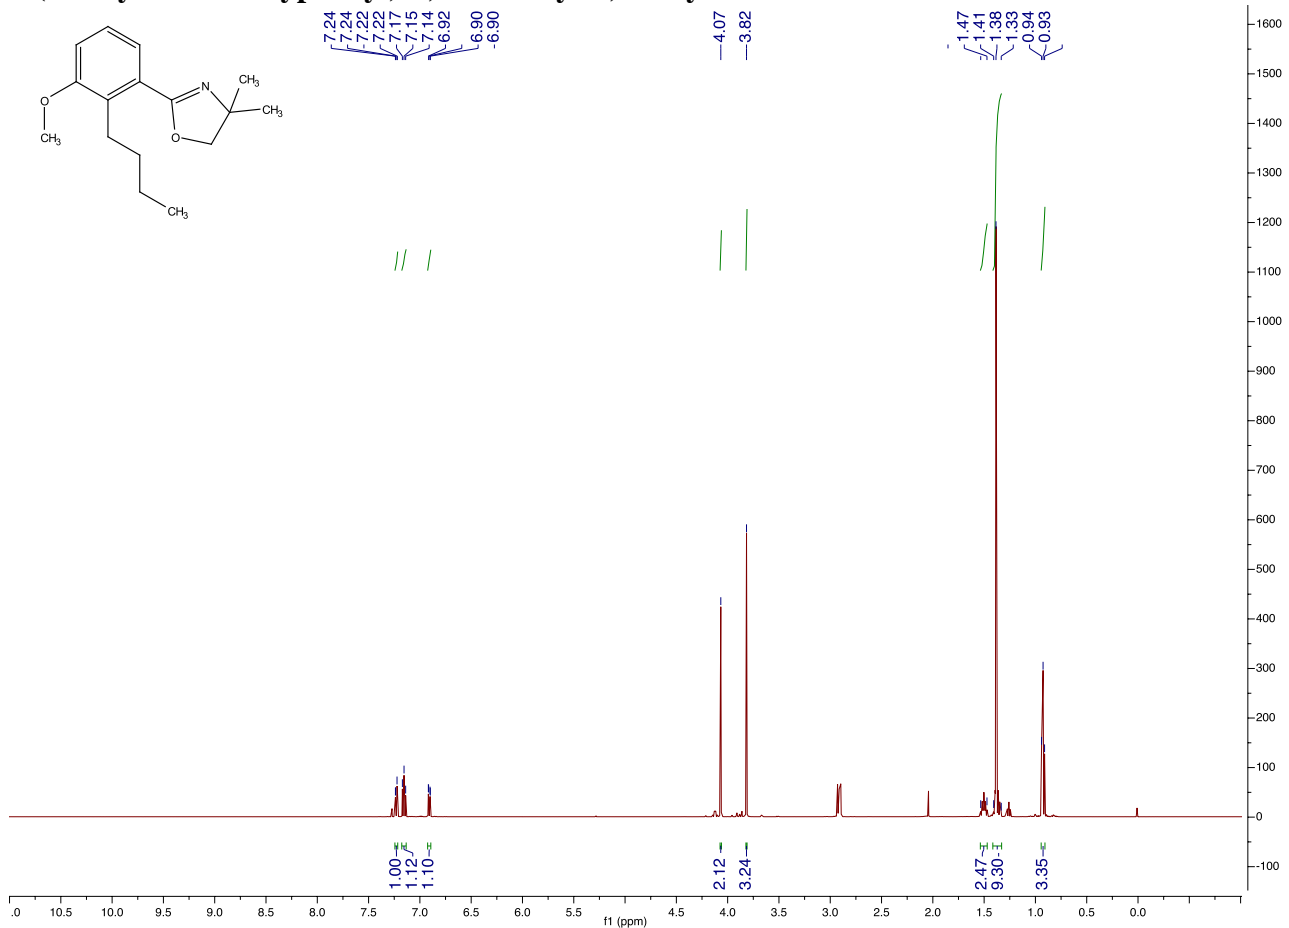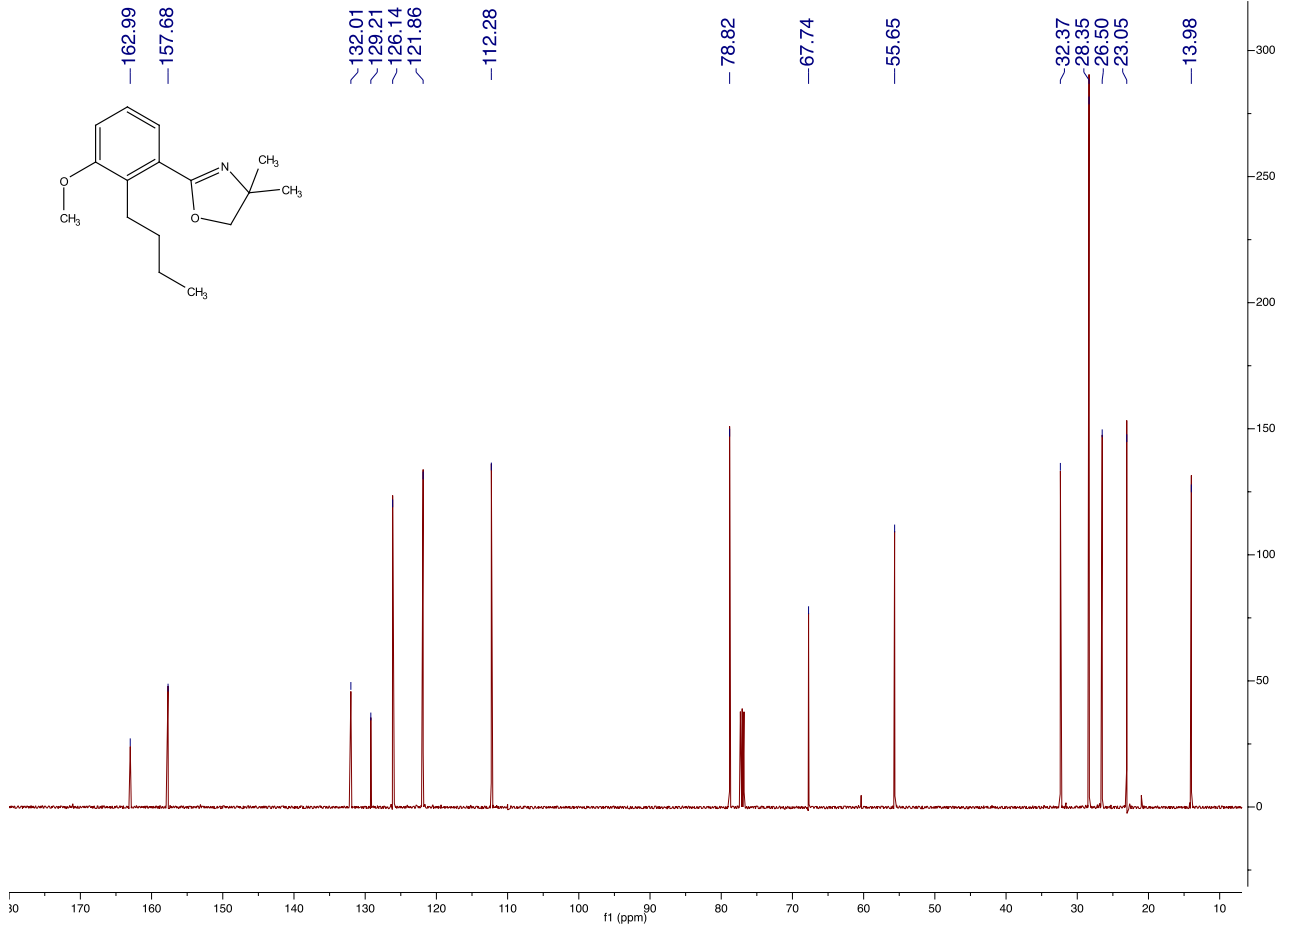

# 2-butyl-3-methoxybenzoic acid

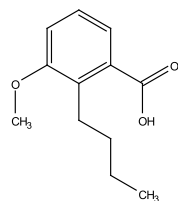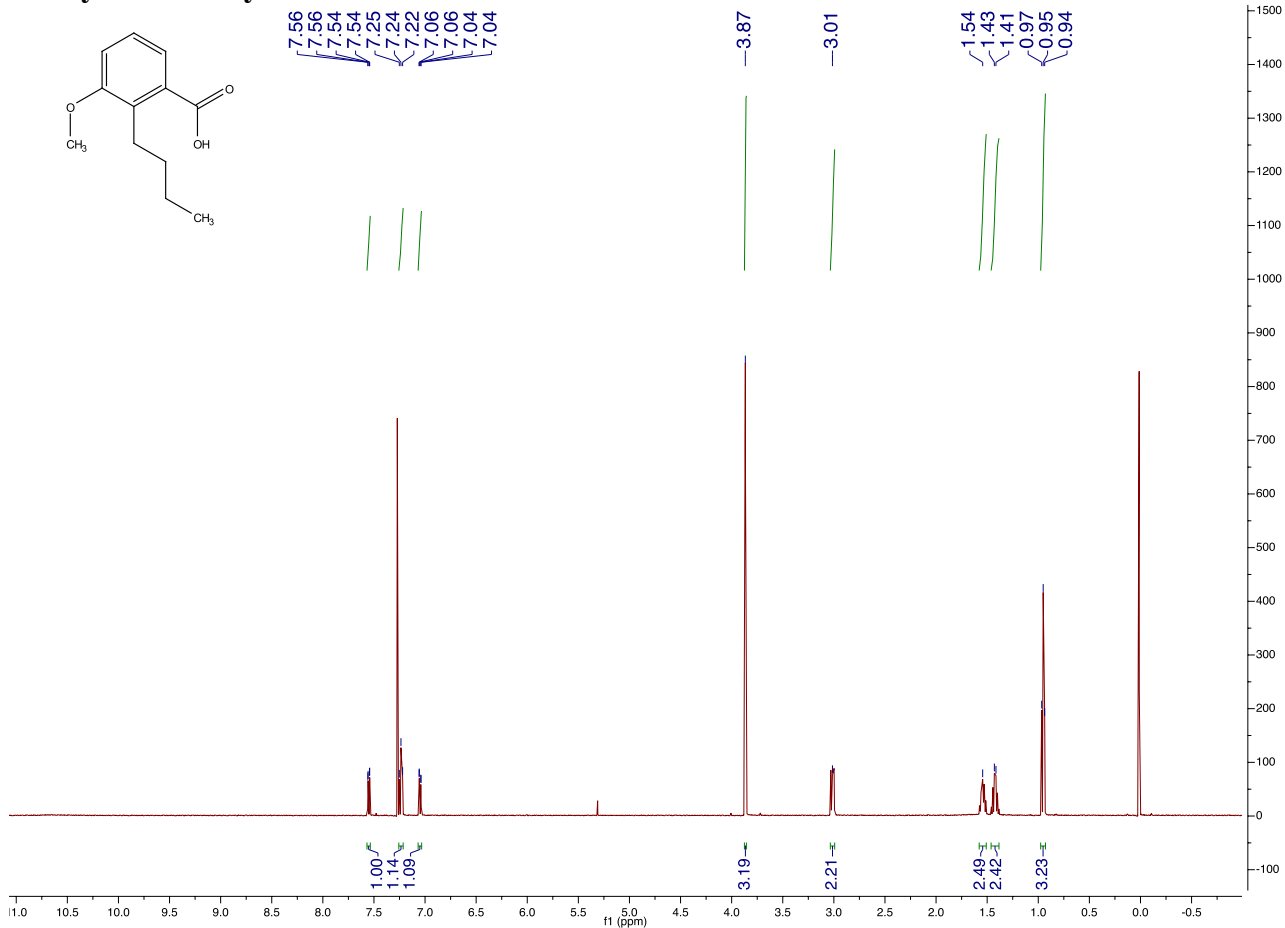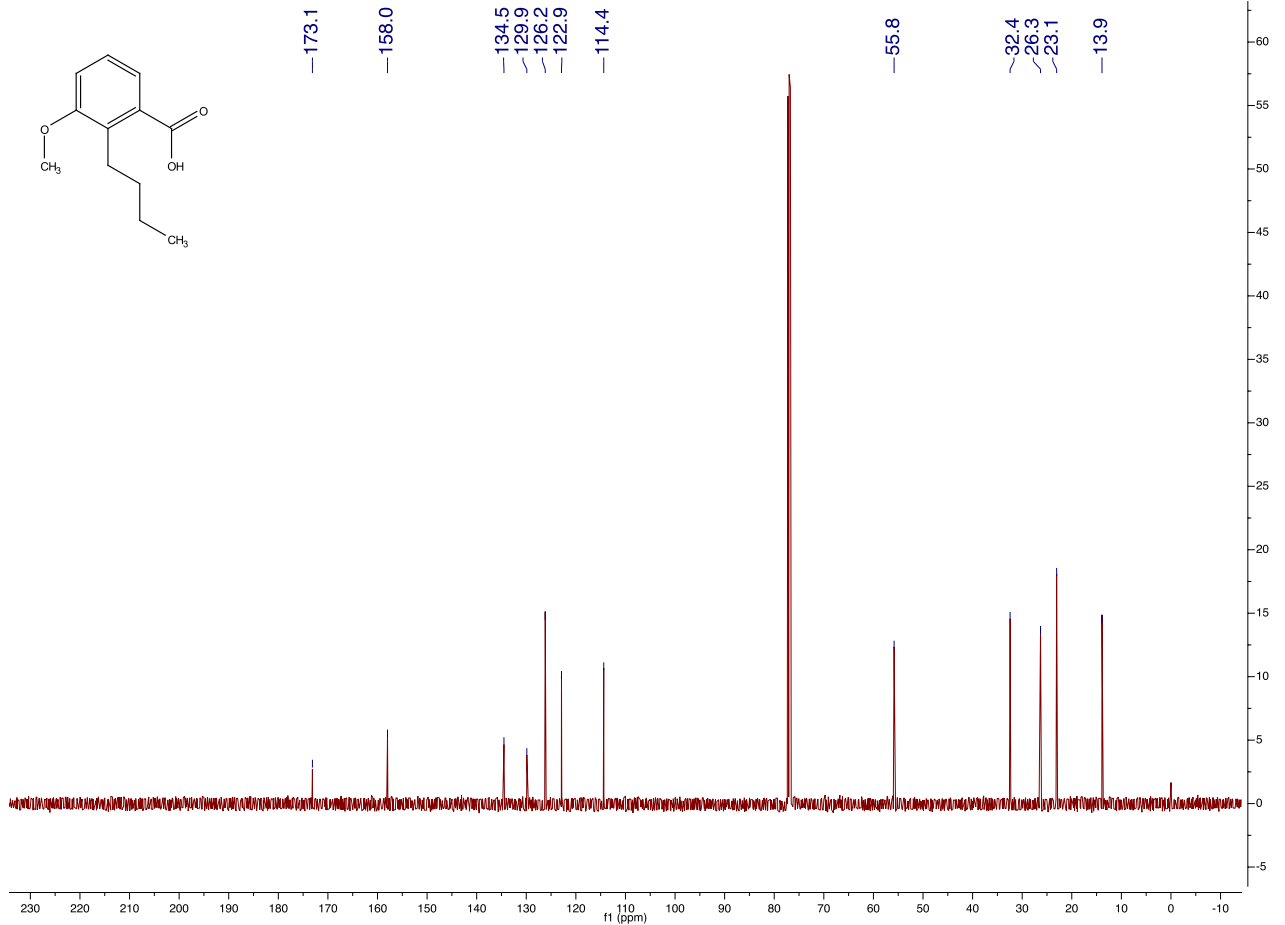

# (2-butyl-3-methoxyphenyl)methanol

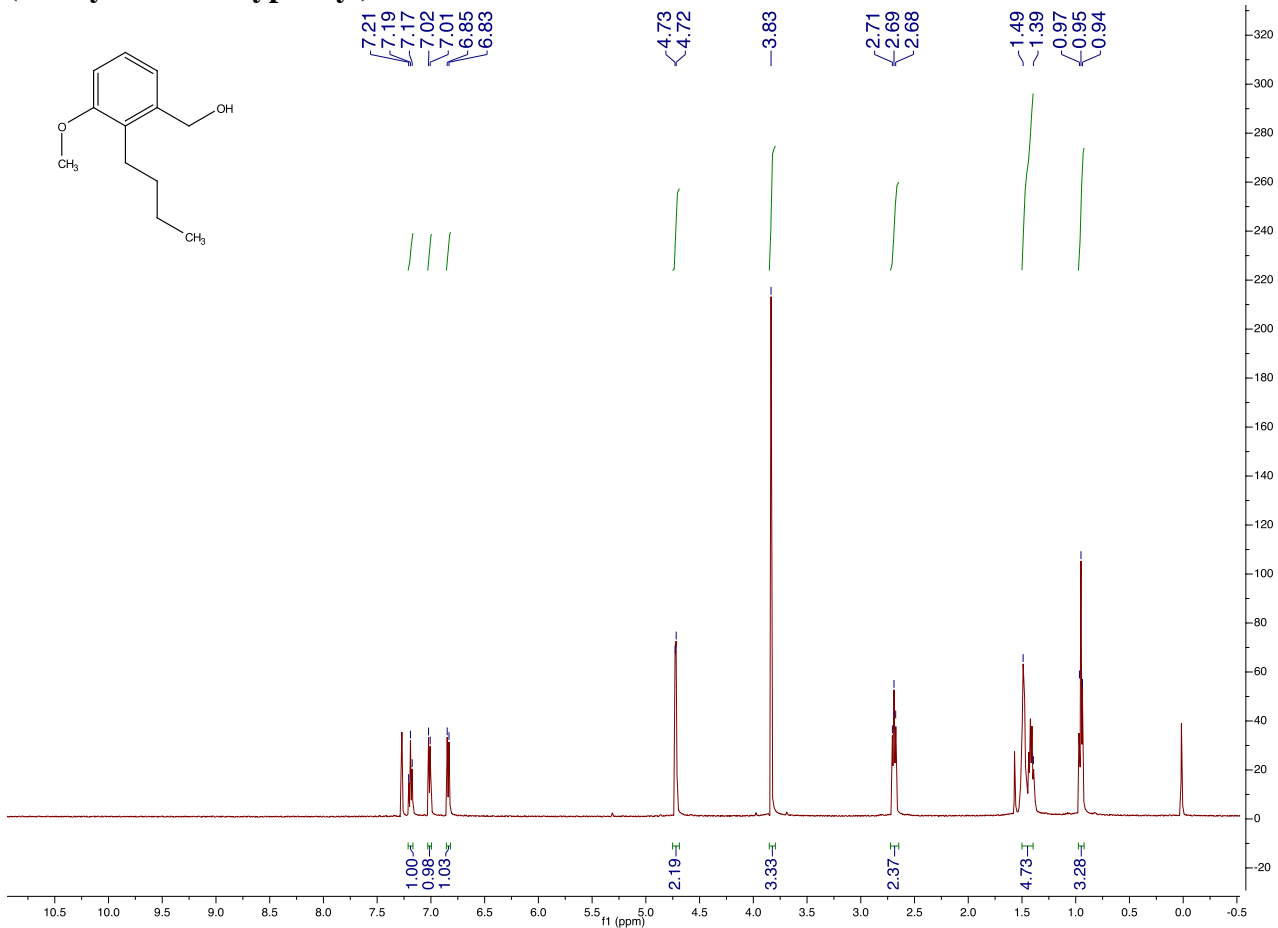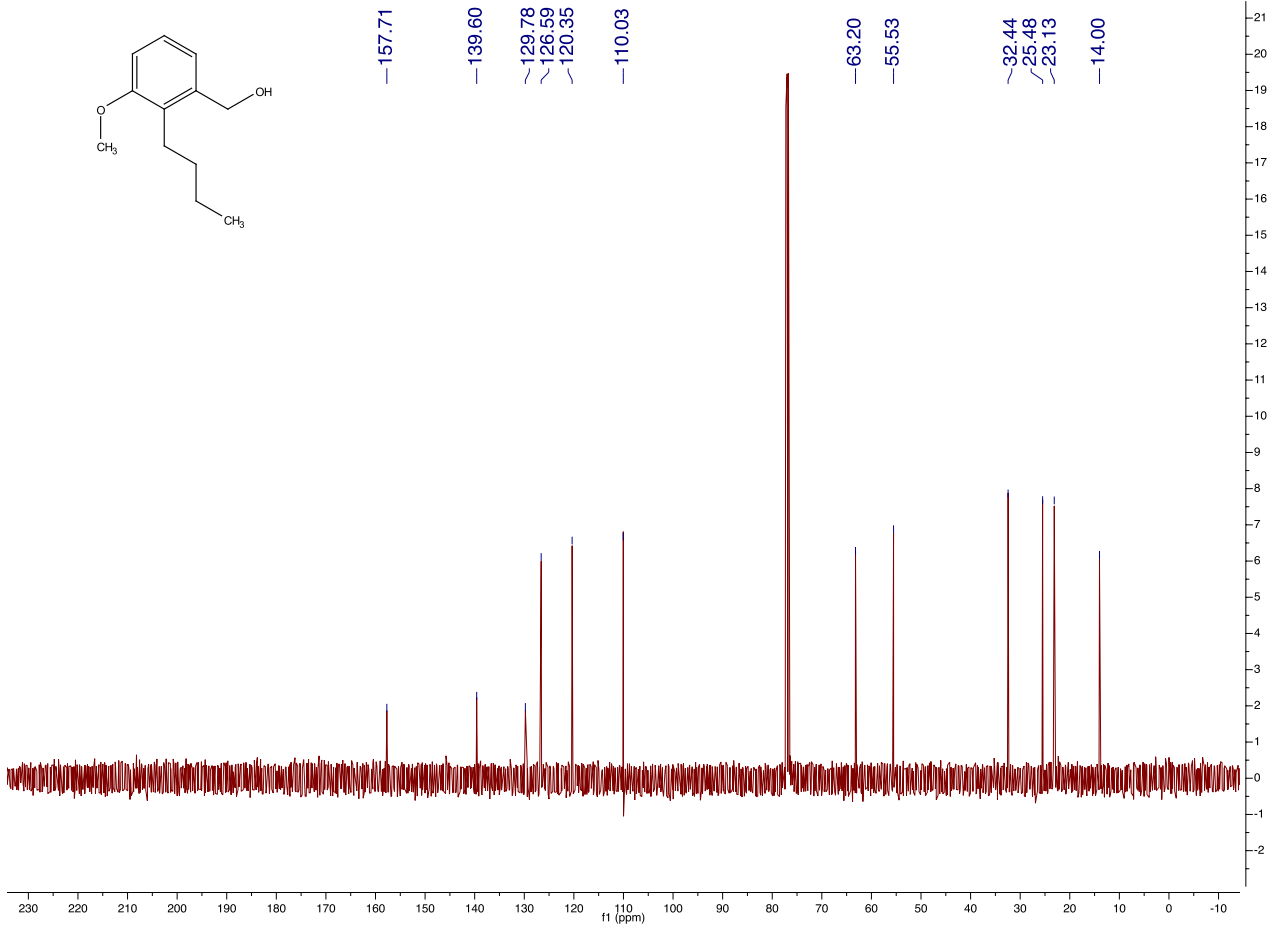

# 2-butyl-3-methoxybenzaldehyde

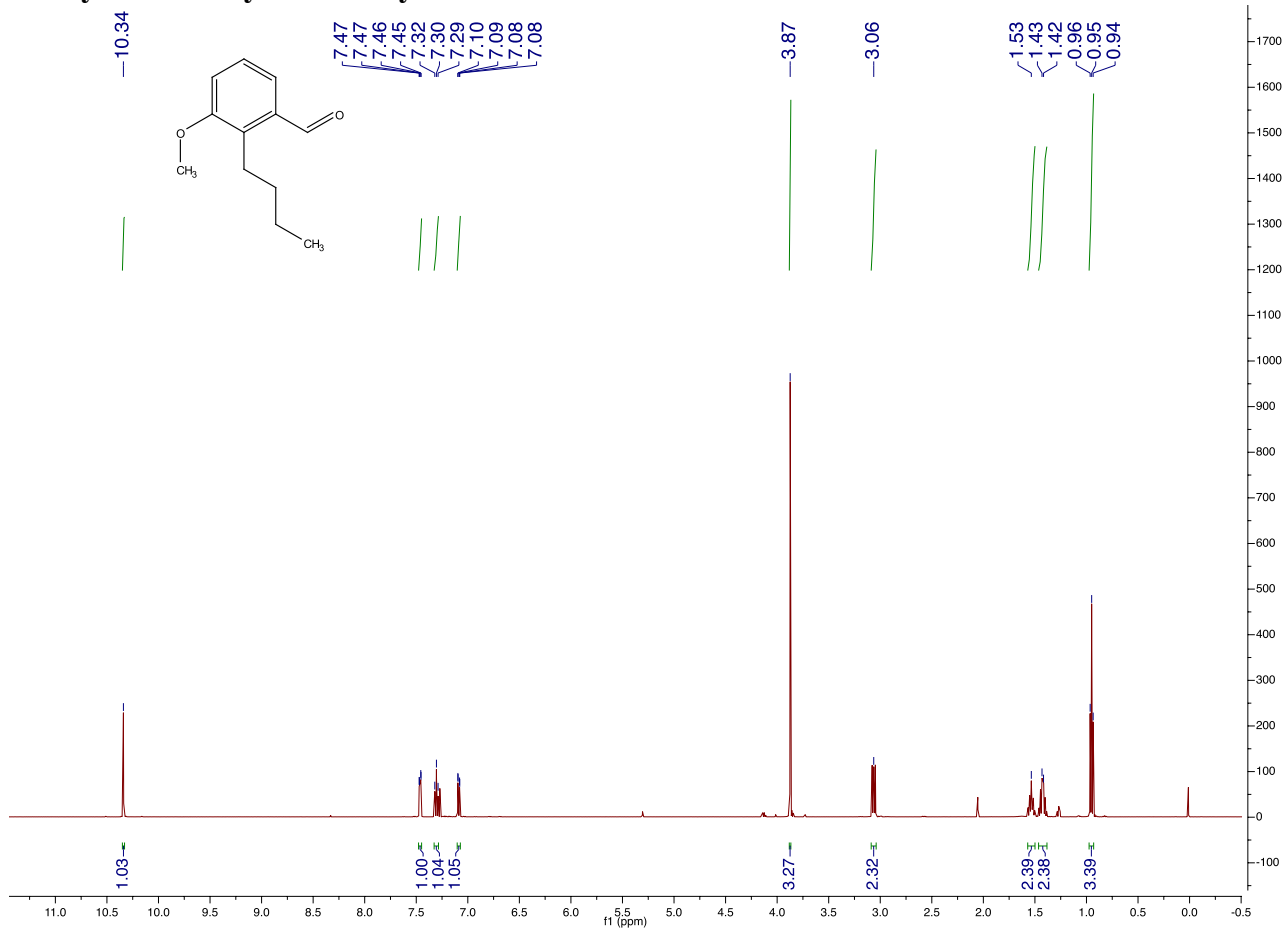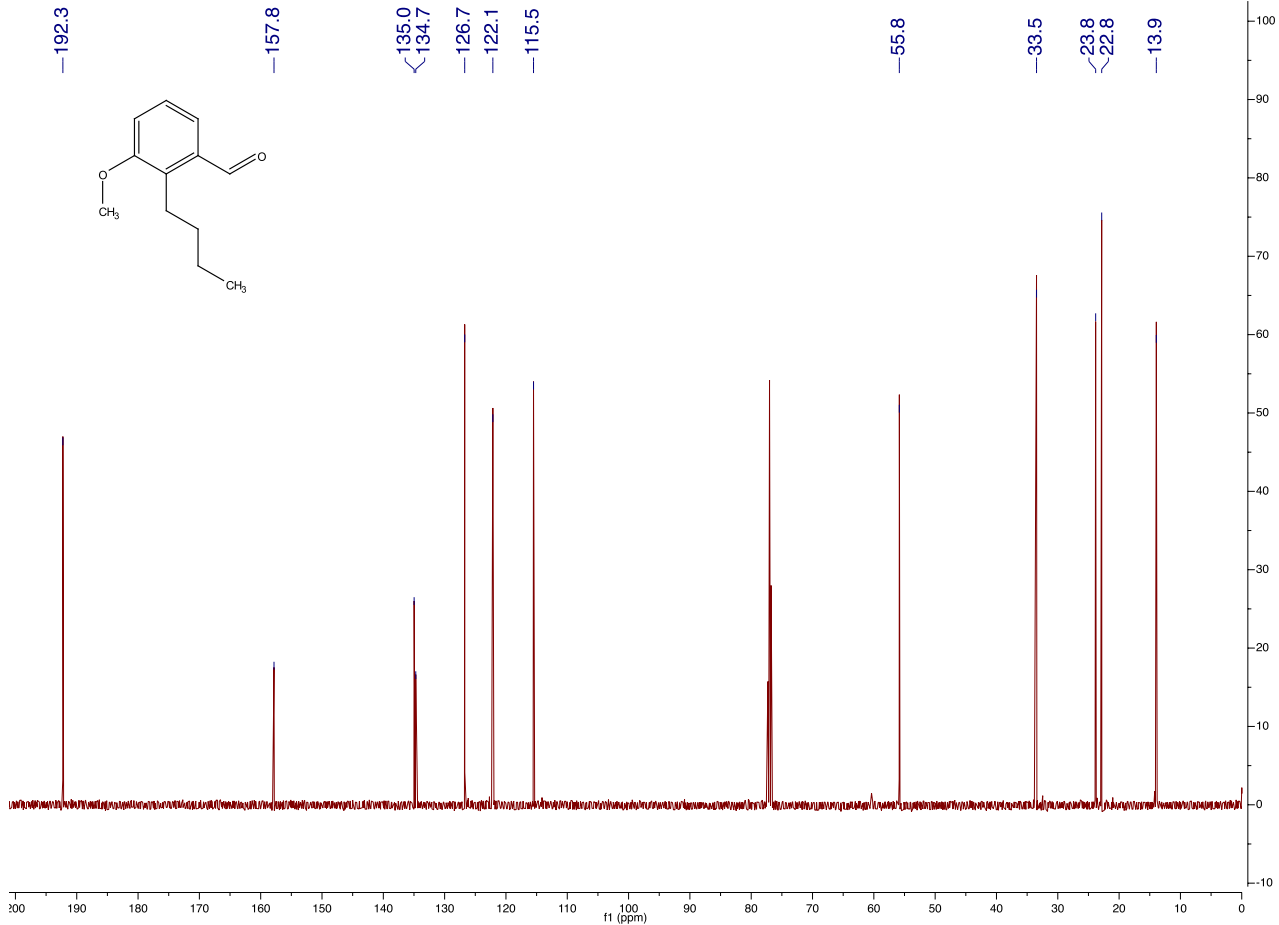

# 5-(2-butyl-3-methoxyphenyl)pent-4-enoic acid

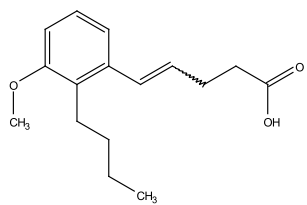

**6**

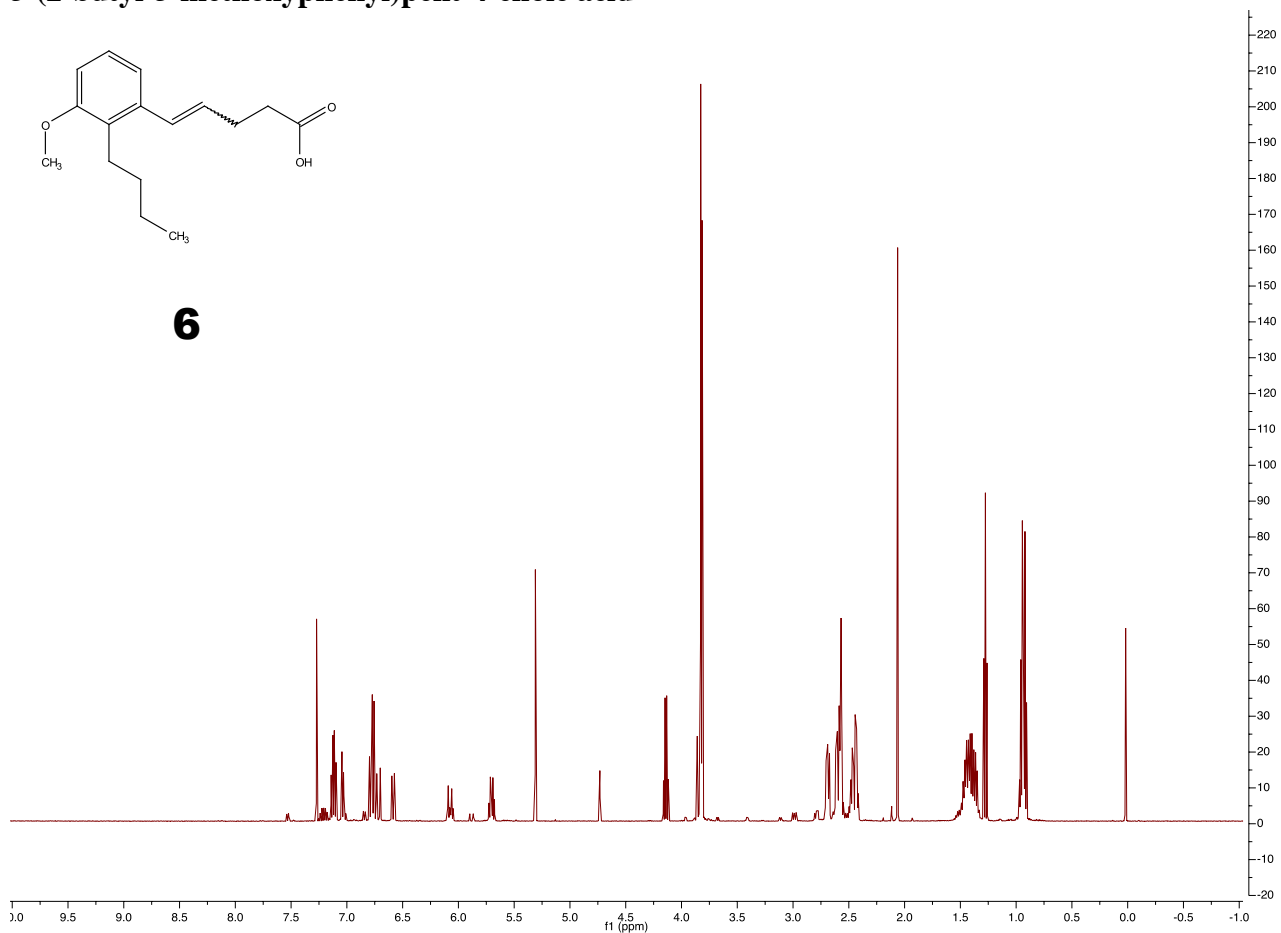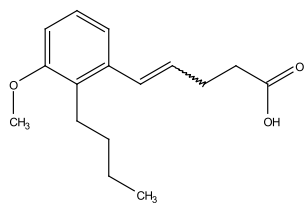

**6**

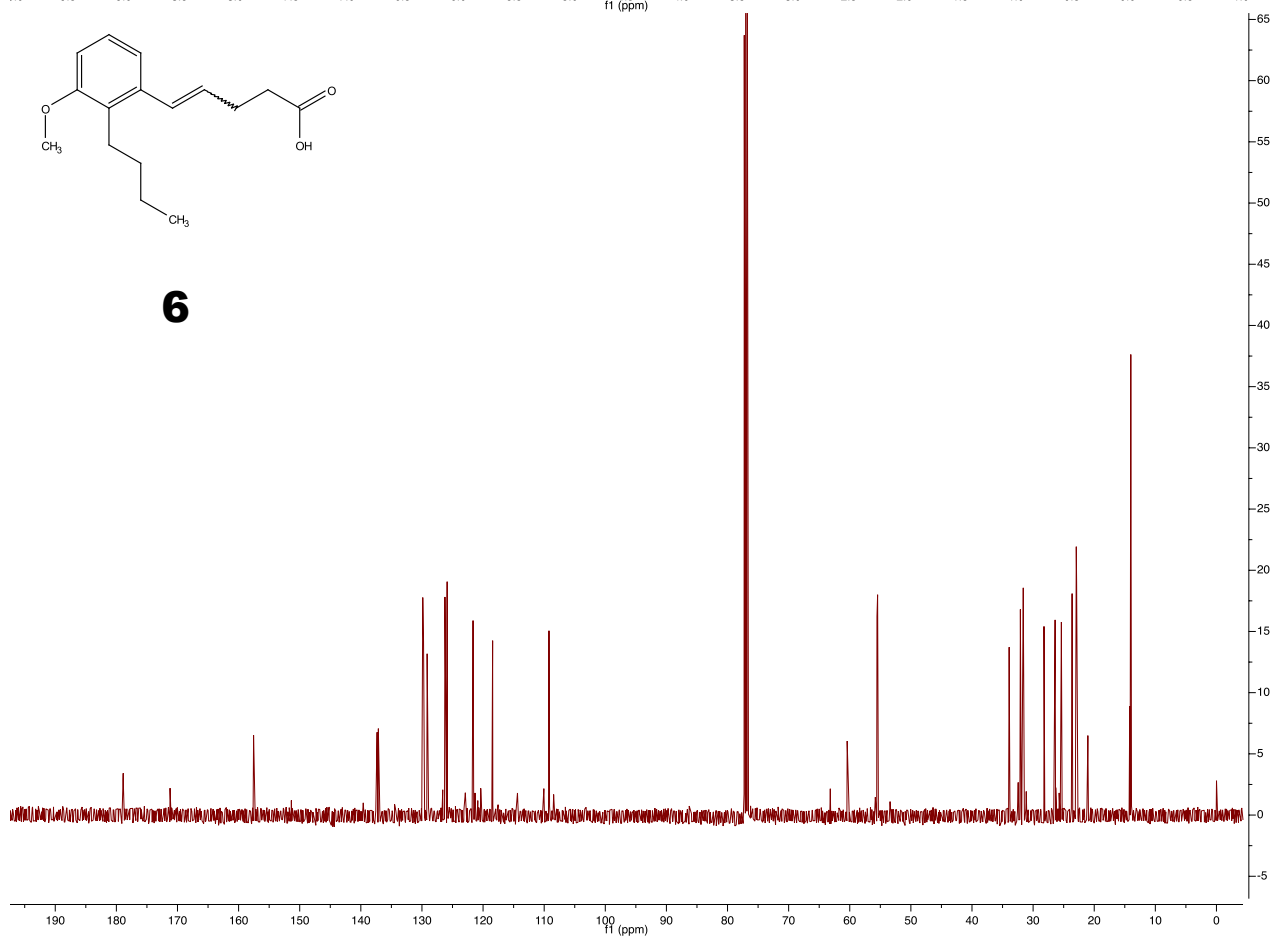

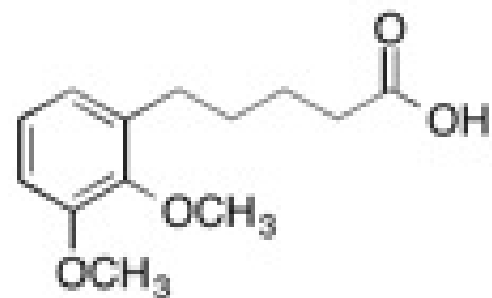

**7**

11.670

7.010  
6.994  
6.978  
6.798  
6.782

3.863  
3.843

2.692  
2.677  
2.663  
2.420  
2.406  
2.392  
1.742  
1.739  
1.724  
1.718  
1.712  
1.709  
1.703  
1.698  
1.692  
1.685  
1.677  
1.668  
1.660

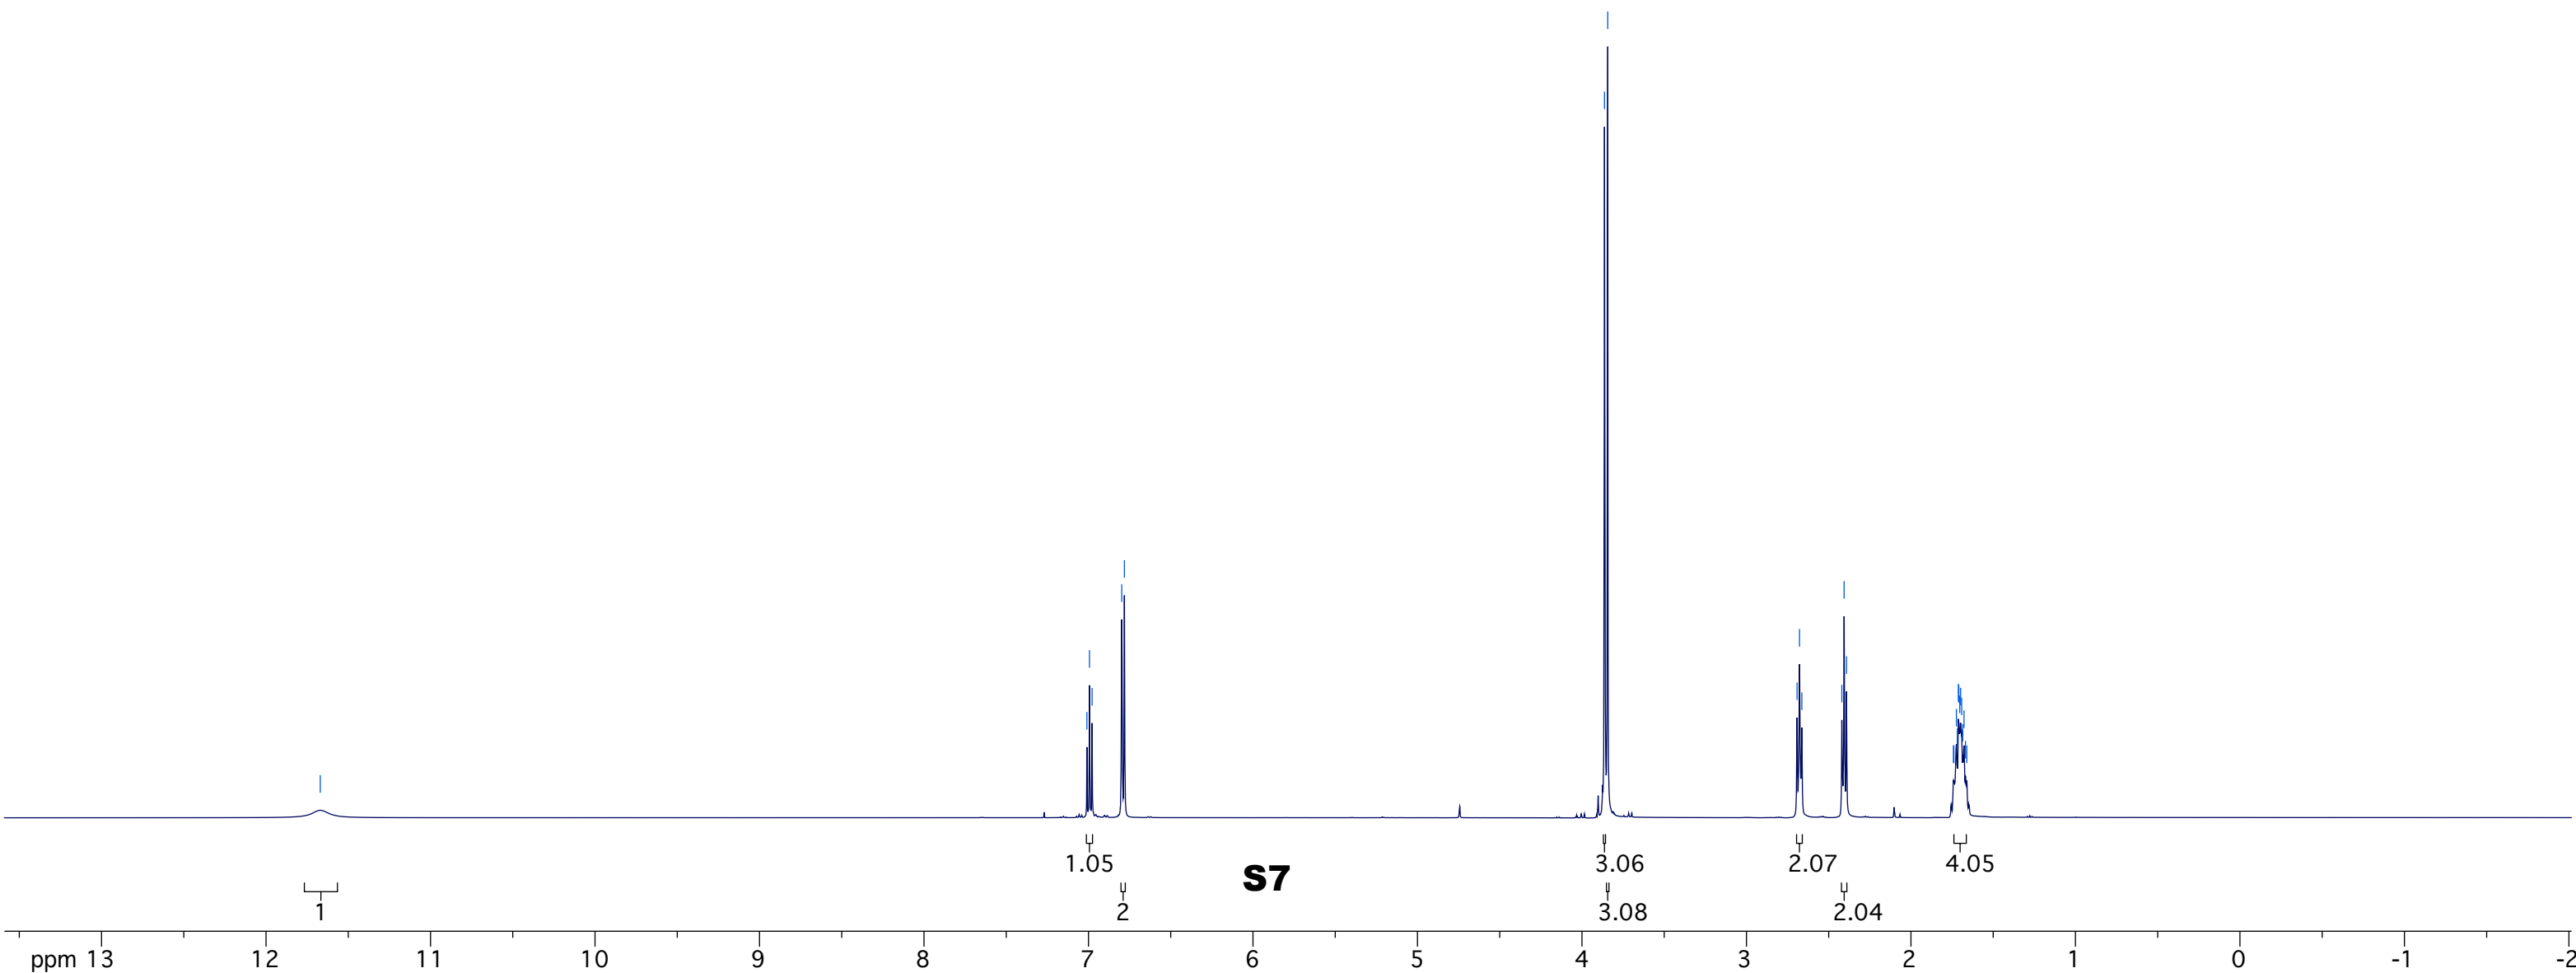

**S7**

1

1.05

2

3.06

3.08

2.07

2.04

4.05

ppm 13 12 11 10 9 8 7 6 5 4 3 2 1 0 -1 -2

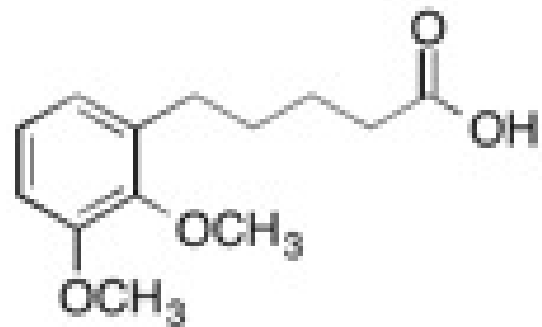

**7**

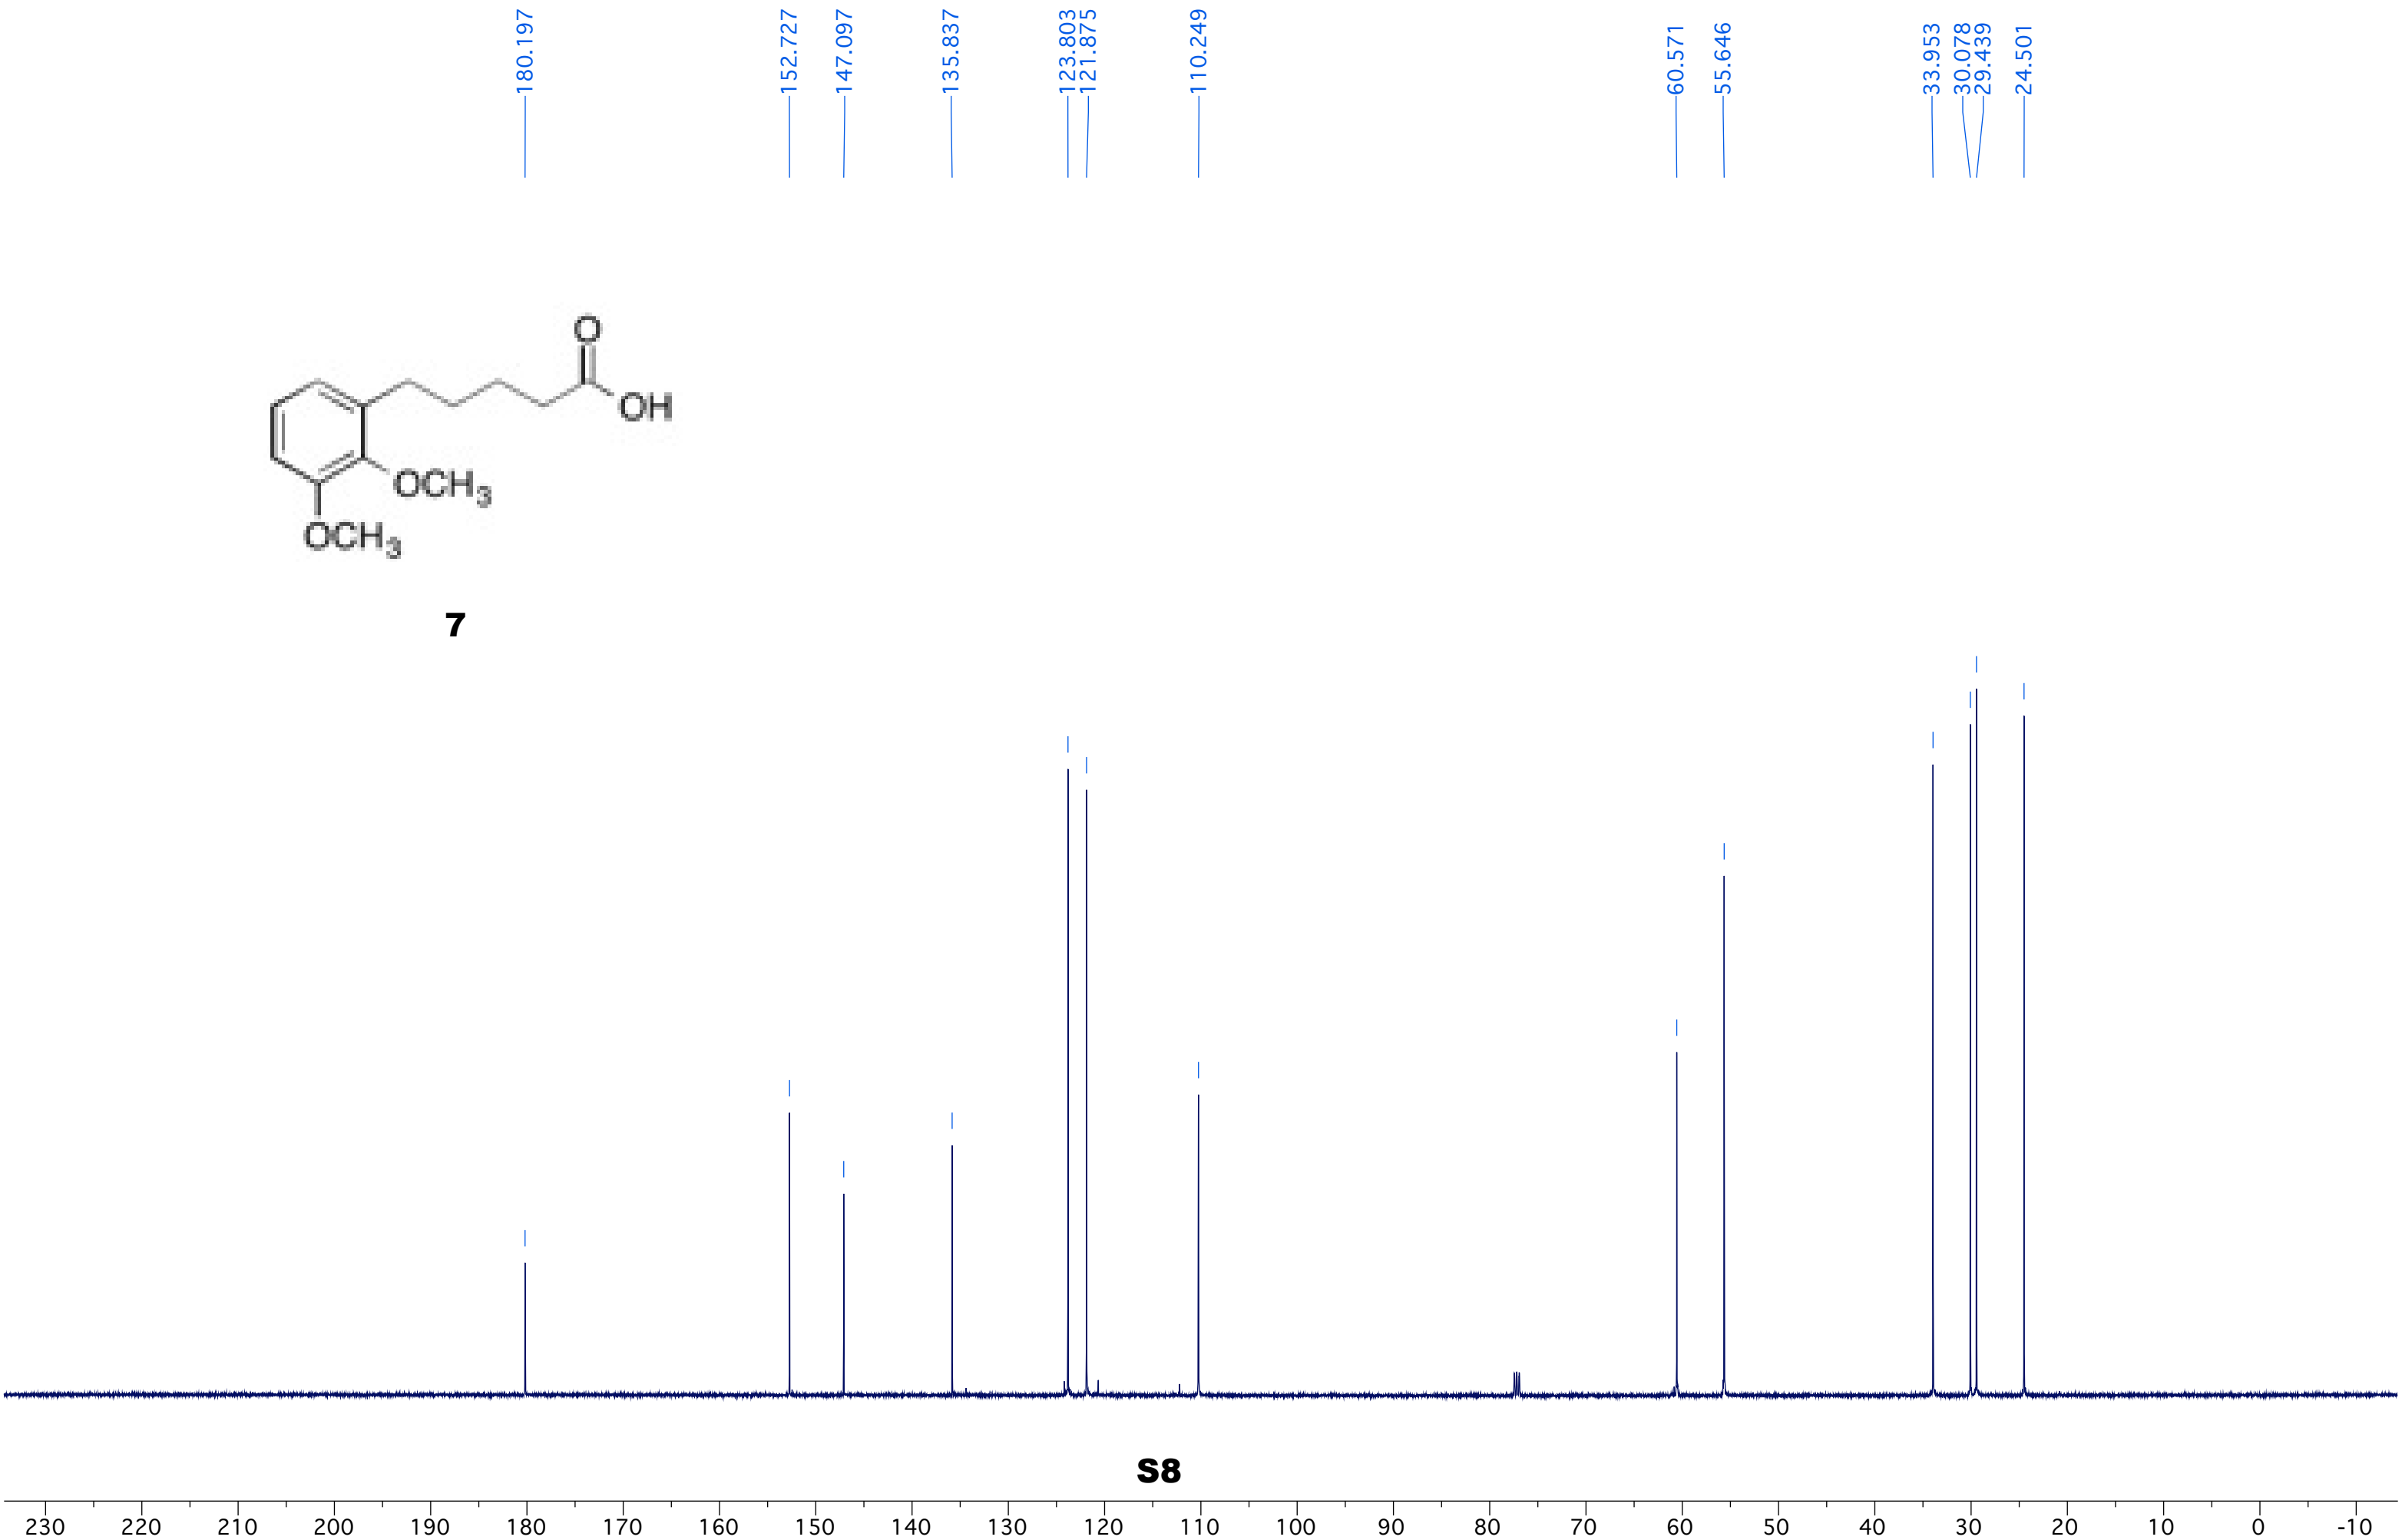



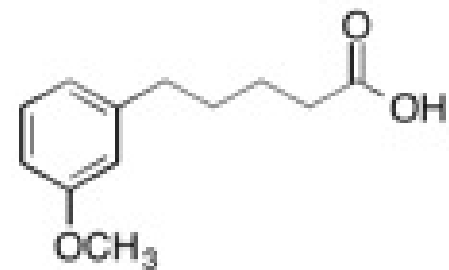

**8**

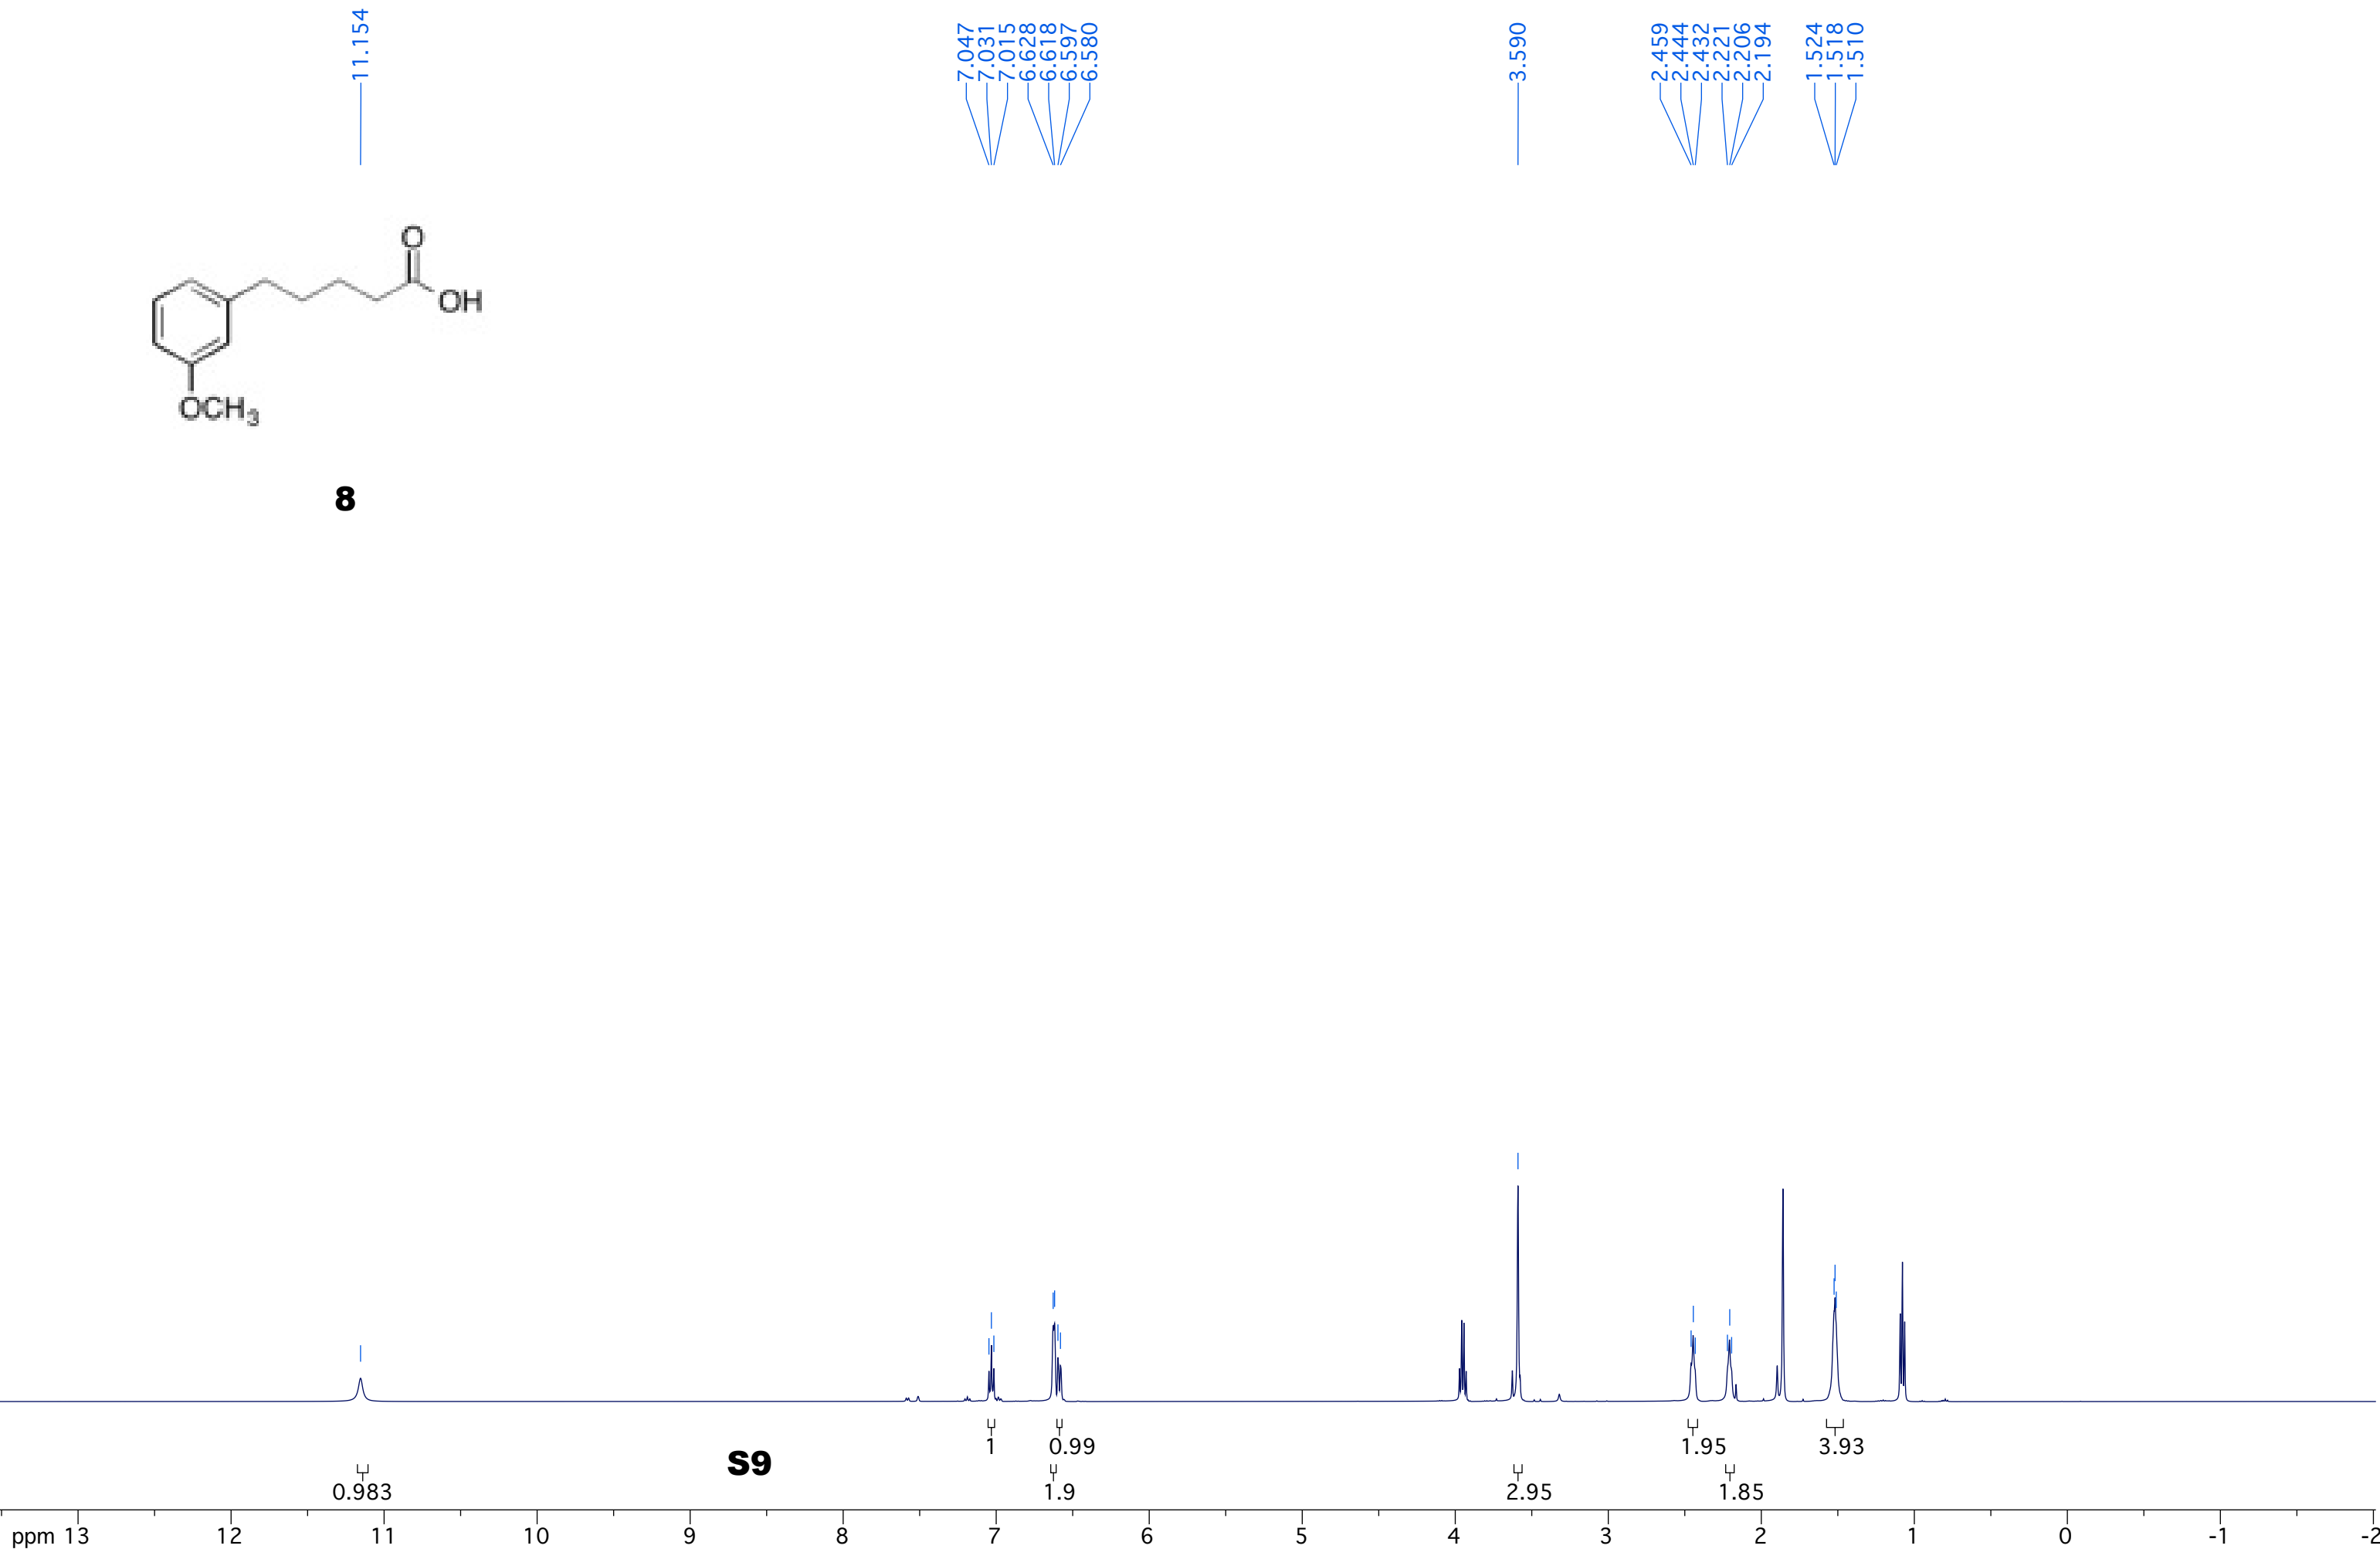

**S9**

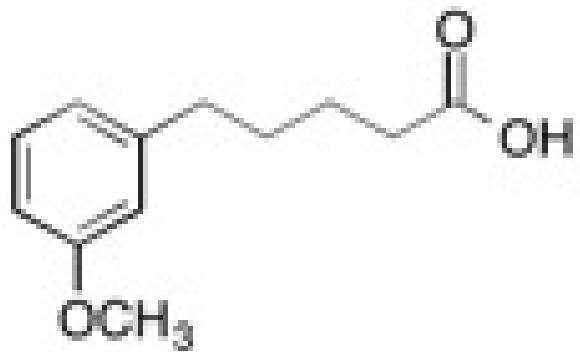

**8**

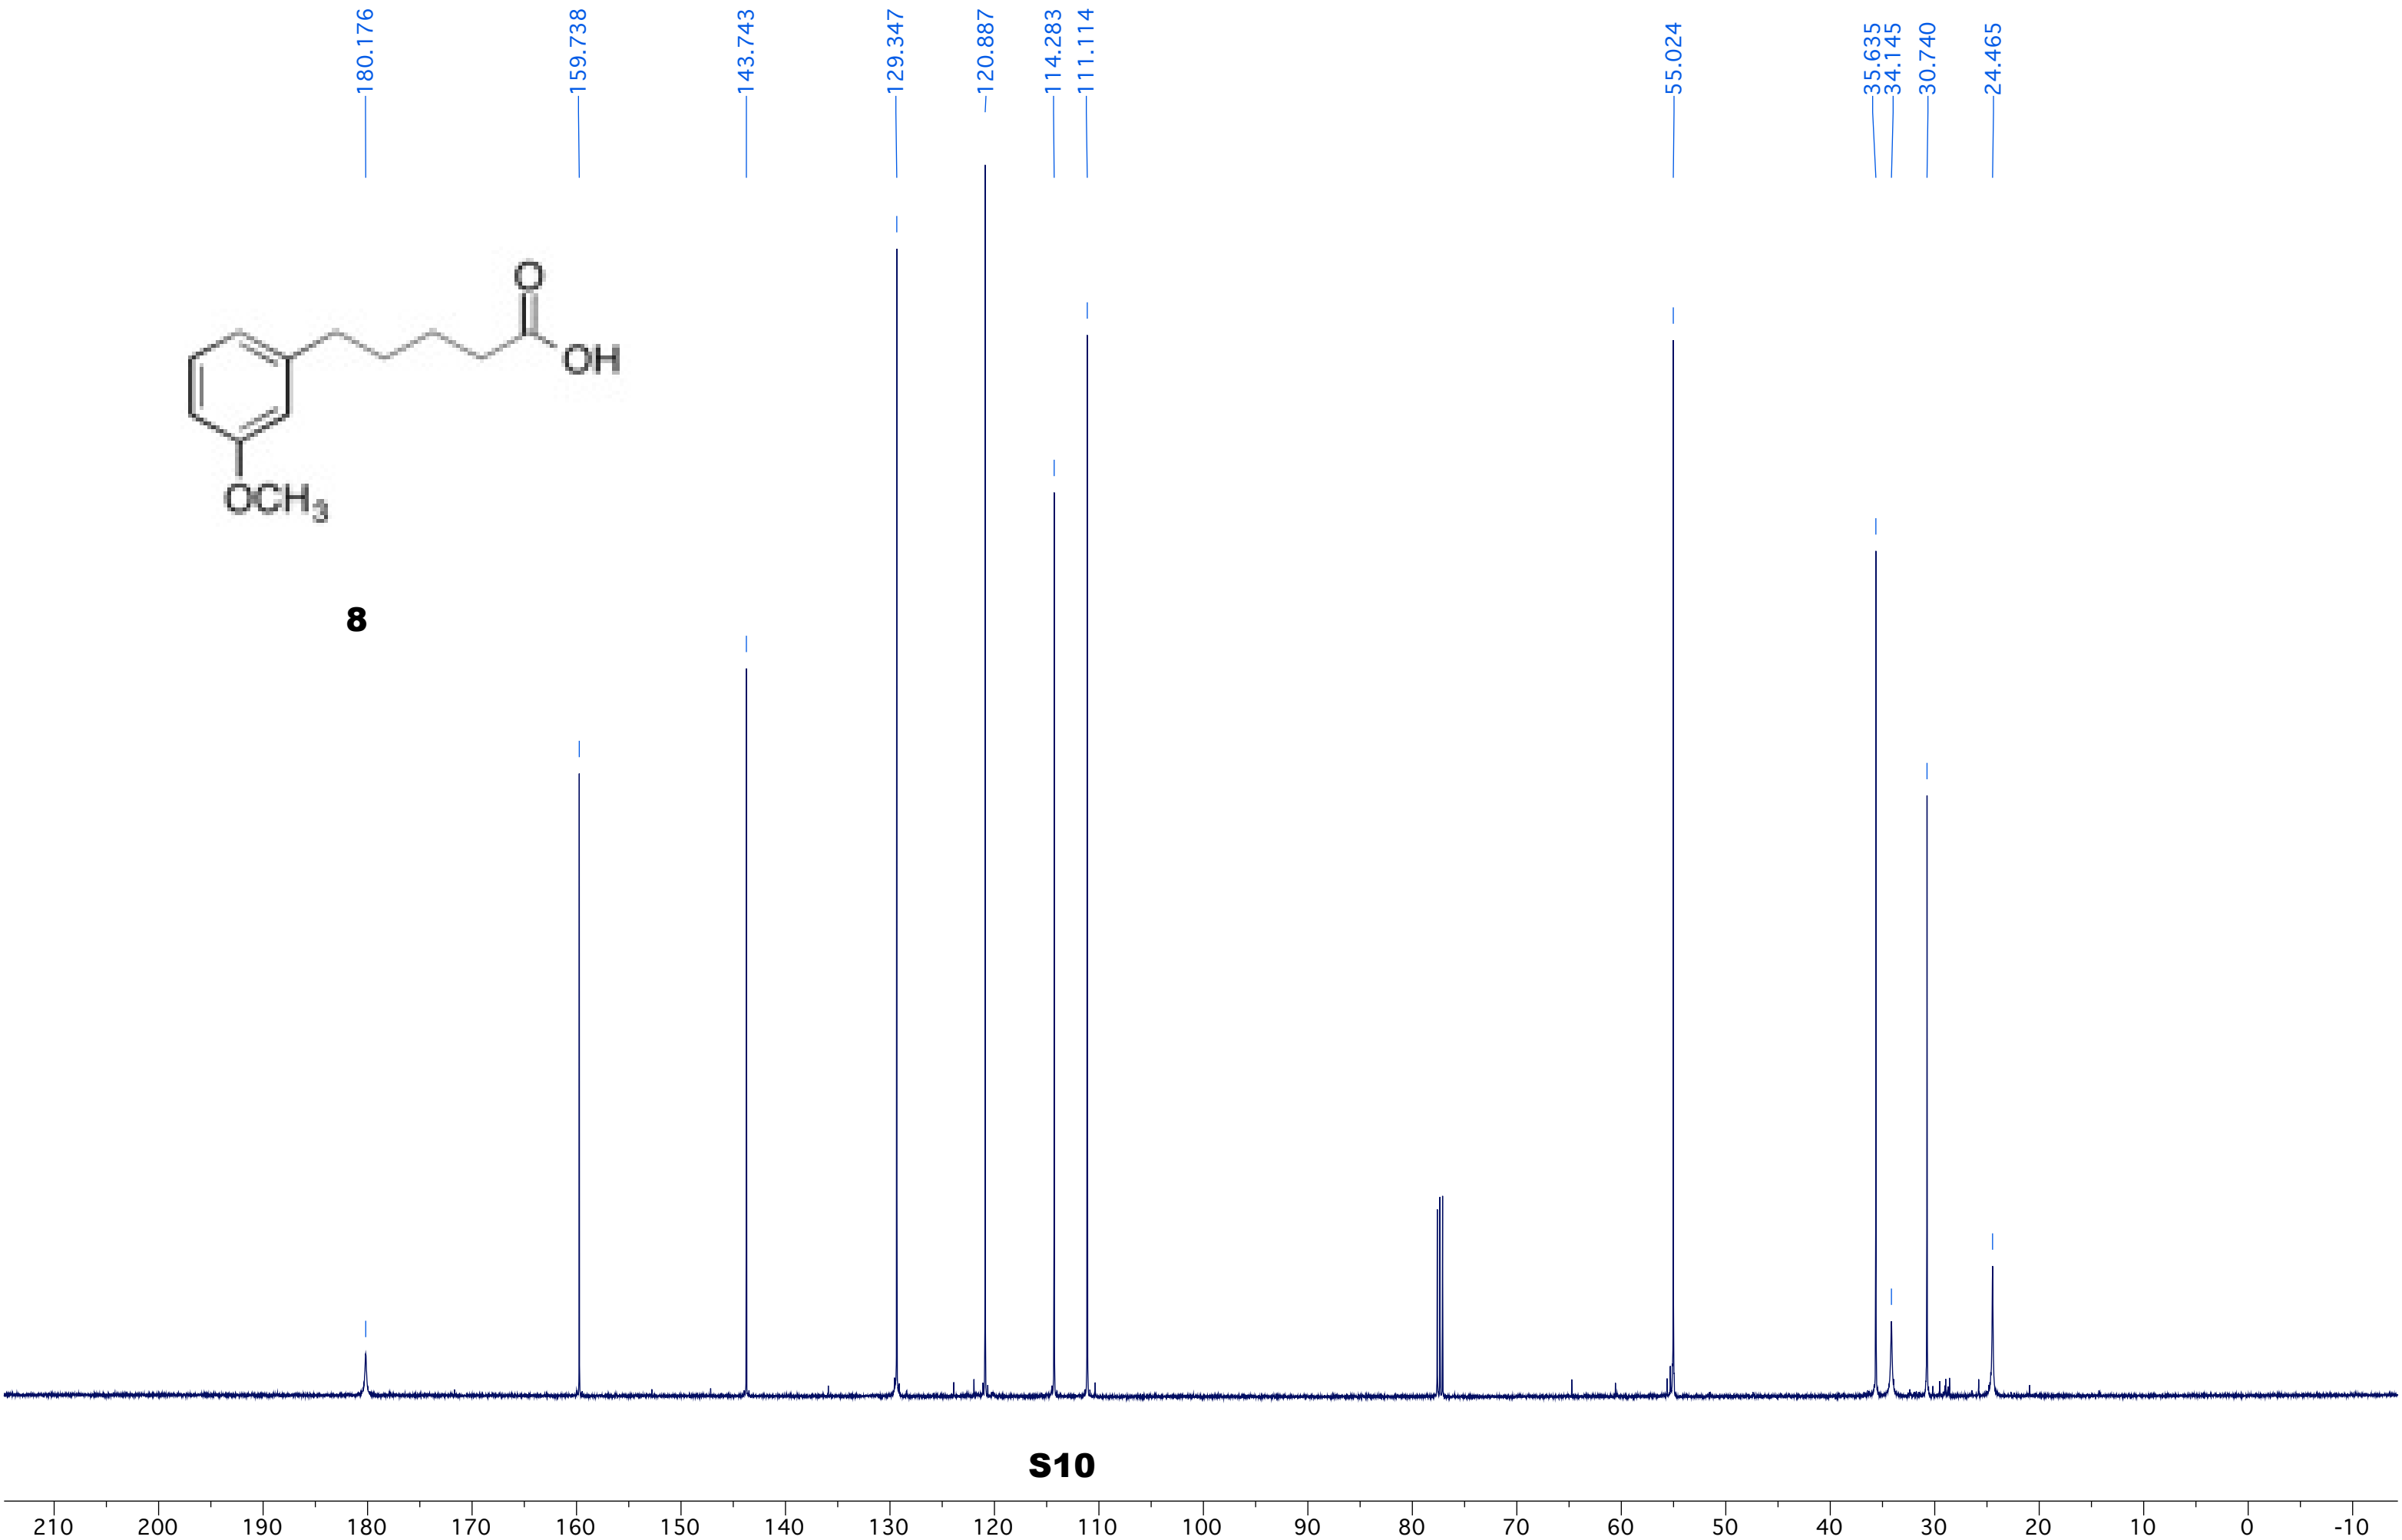

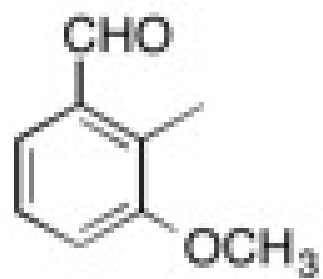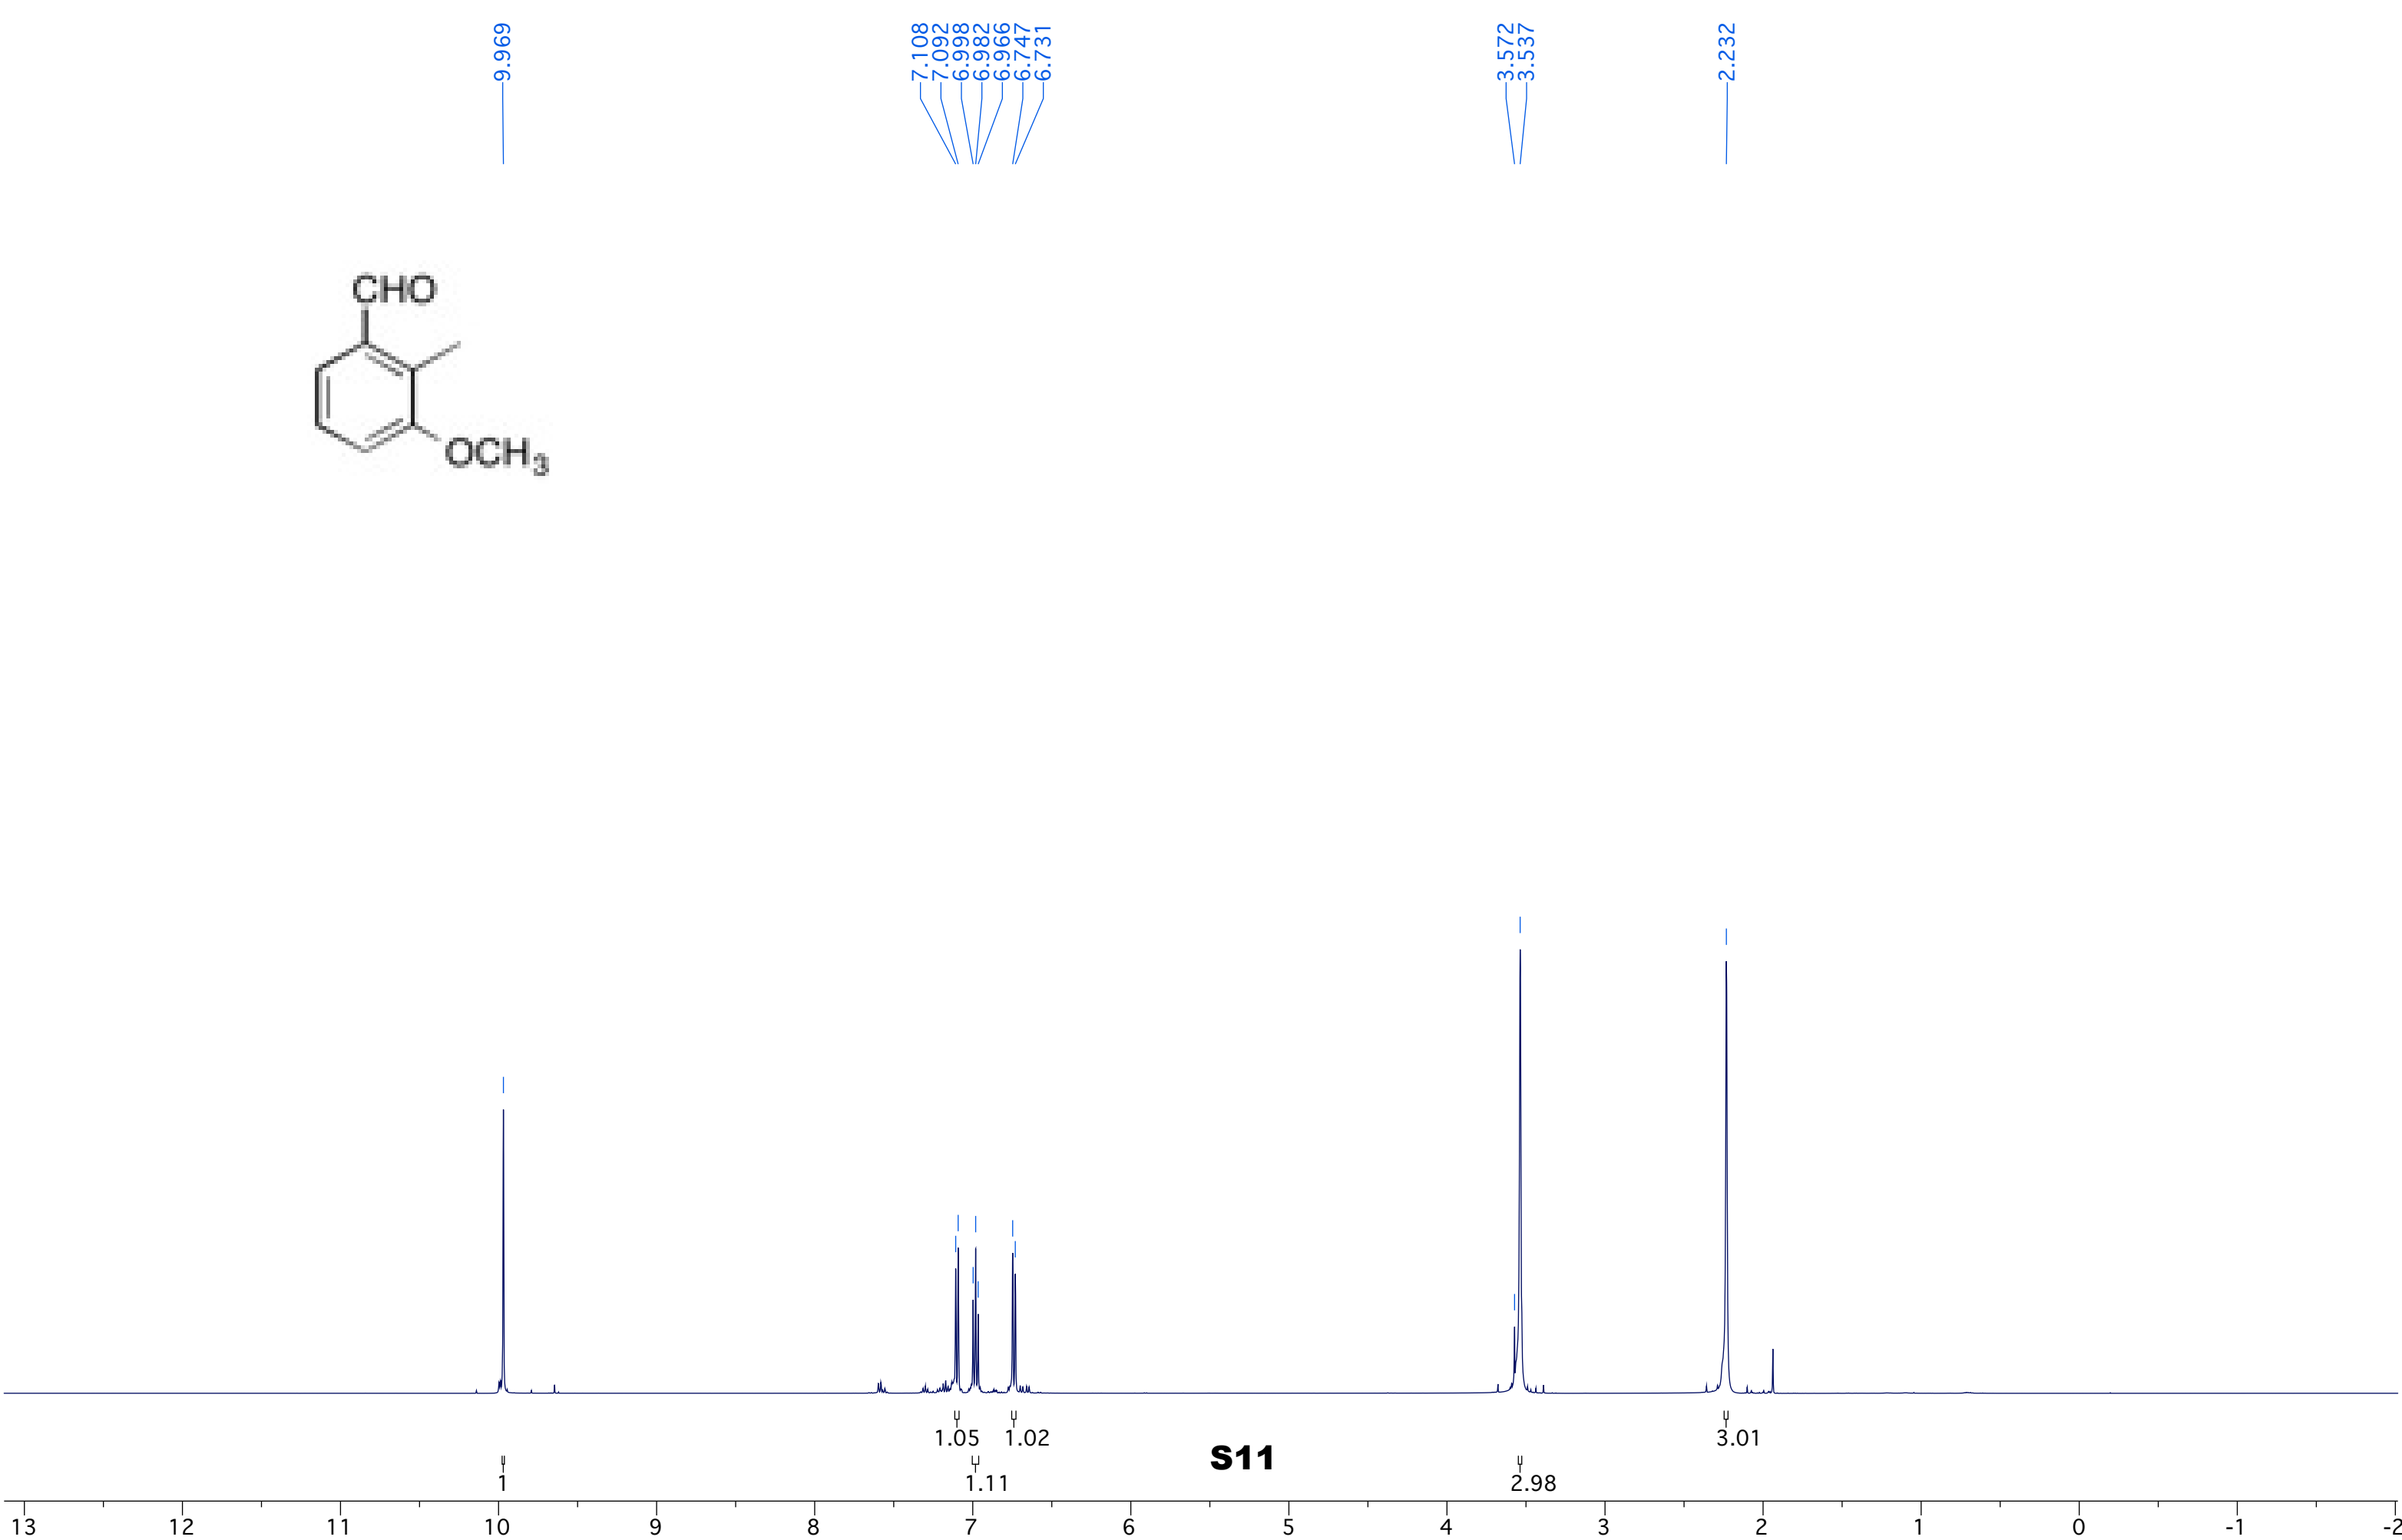

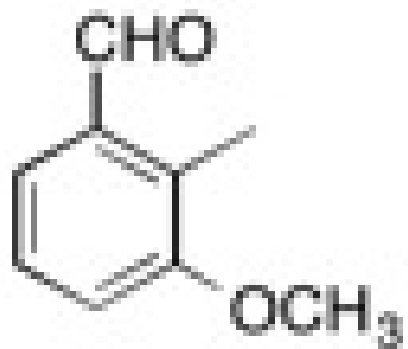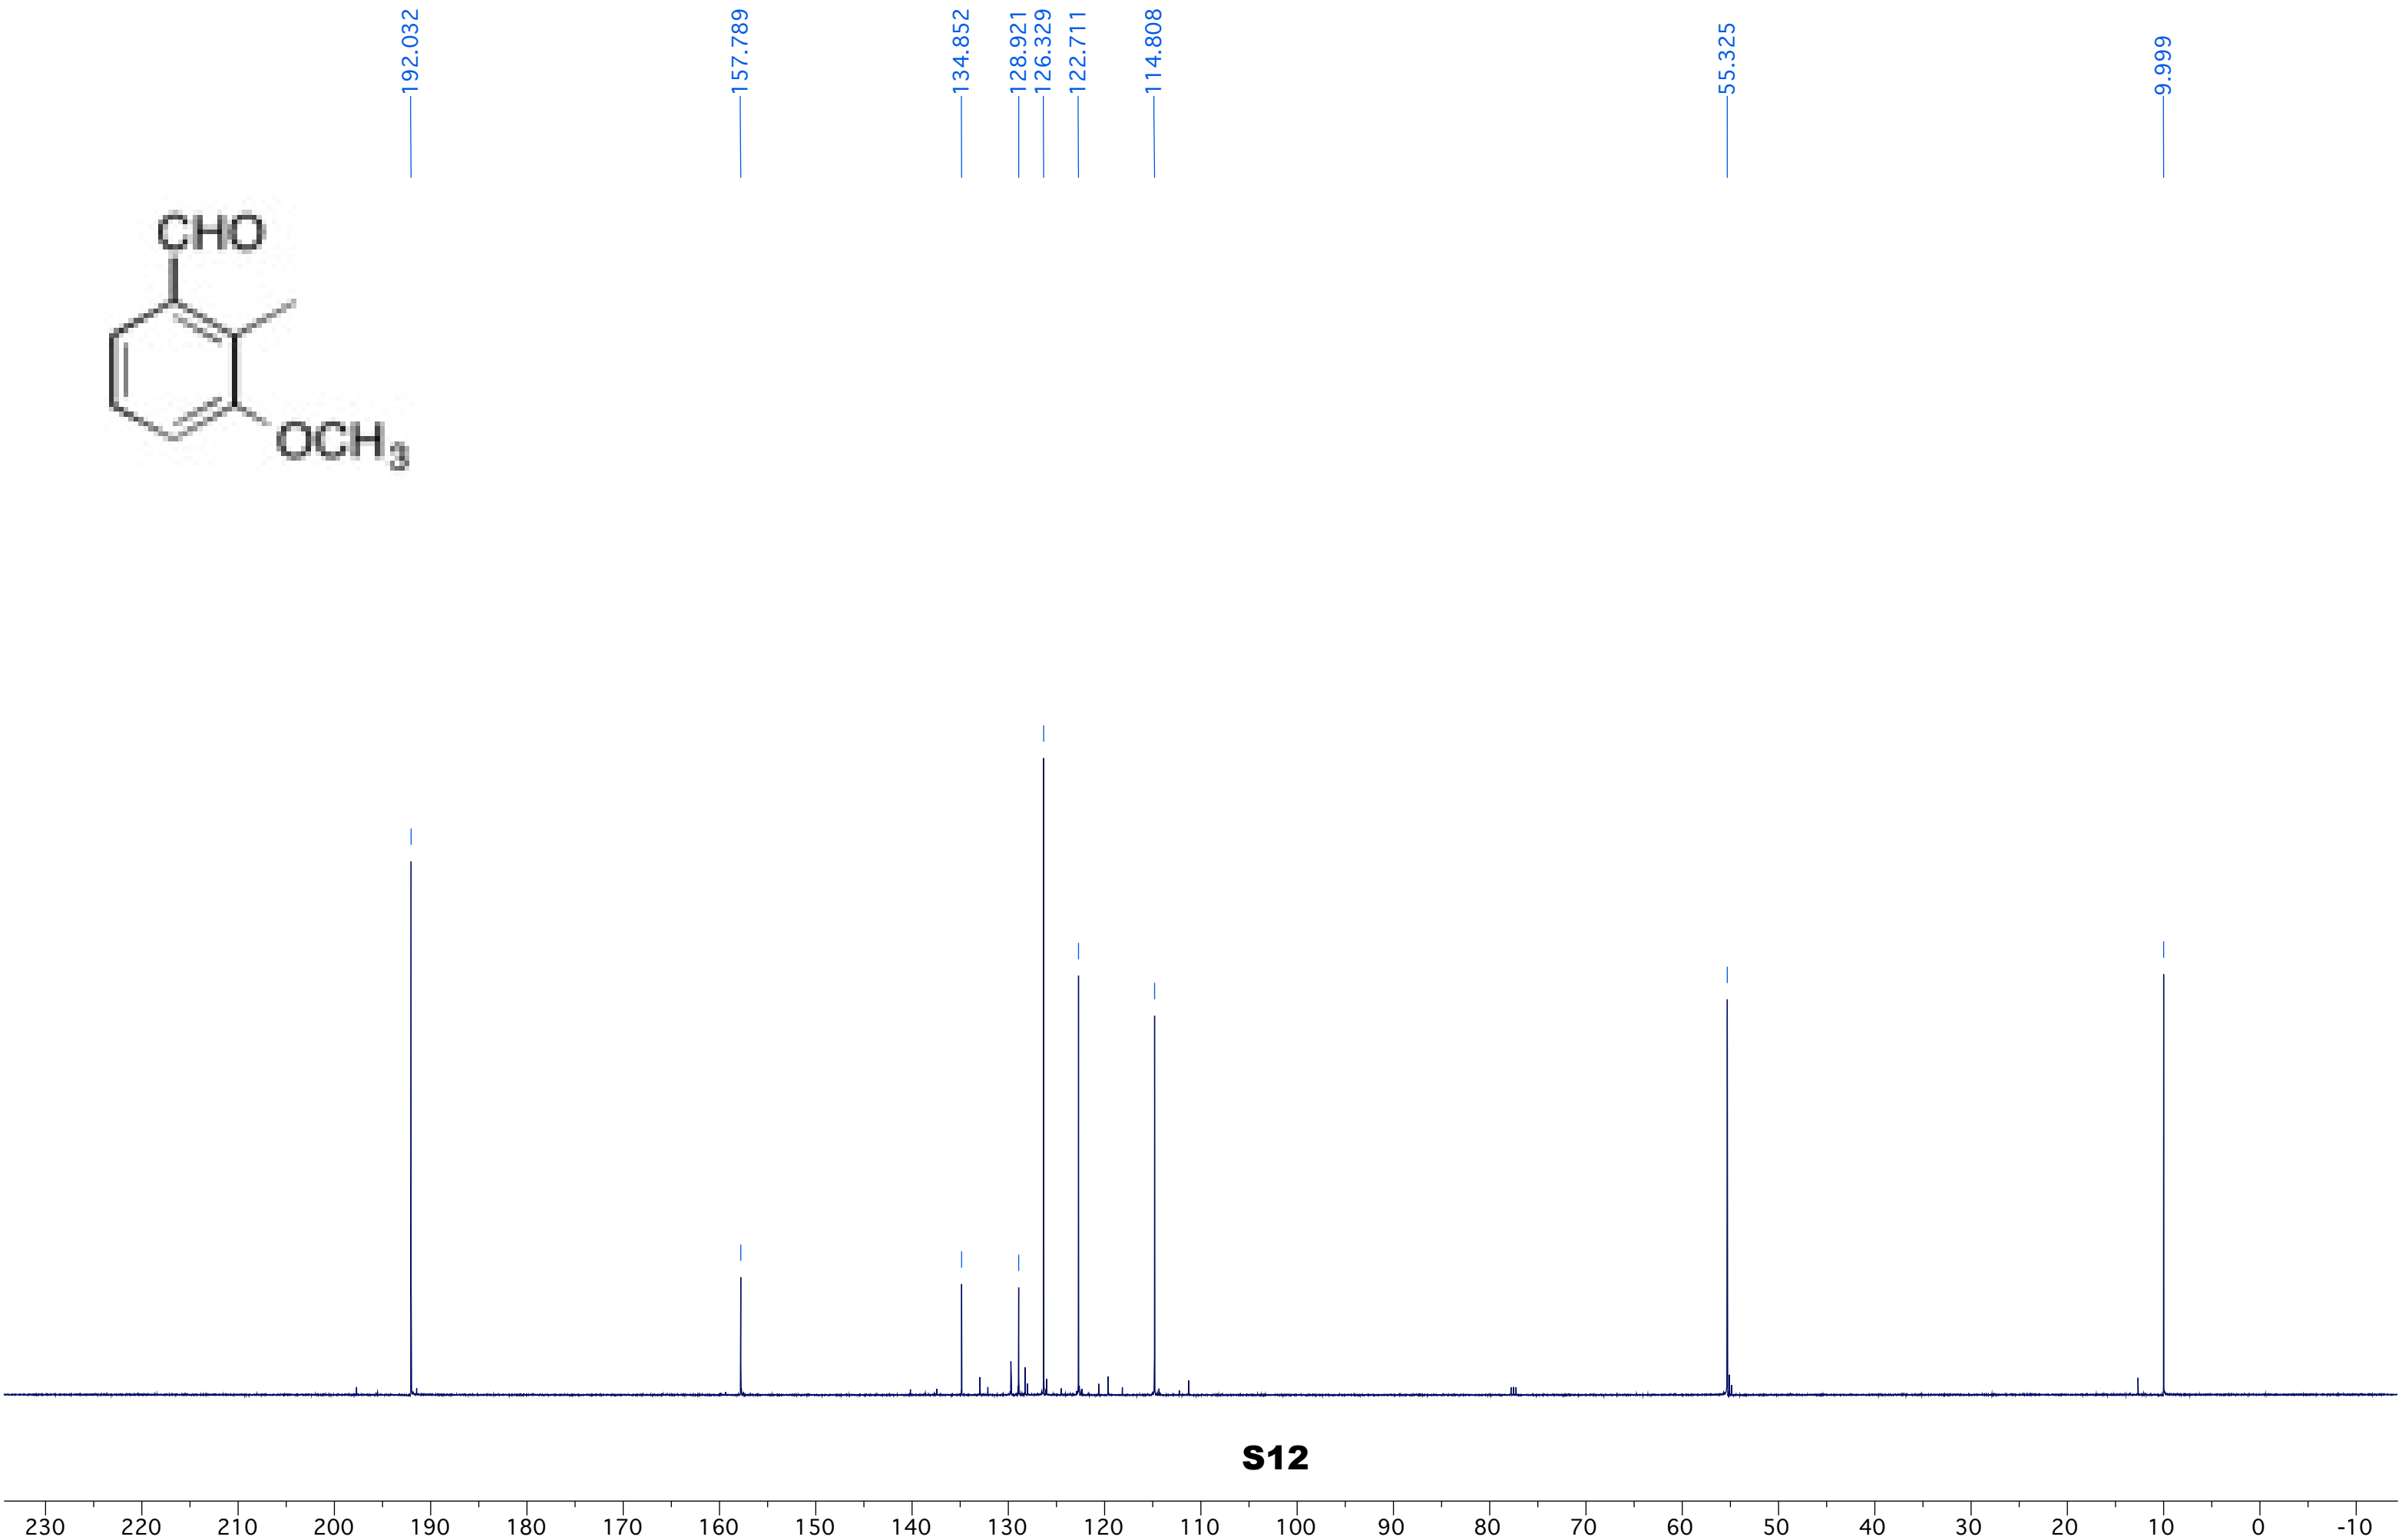

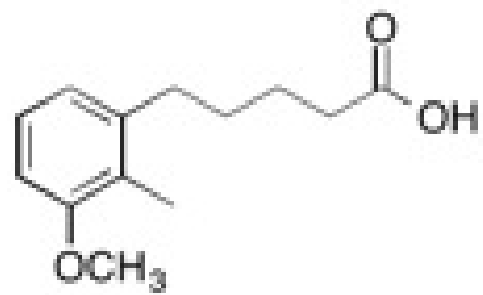

**9**

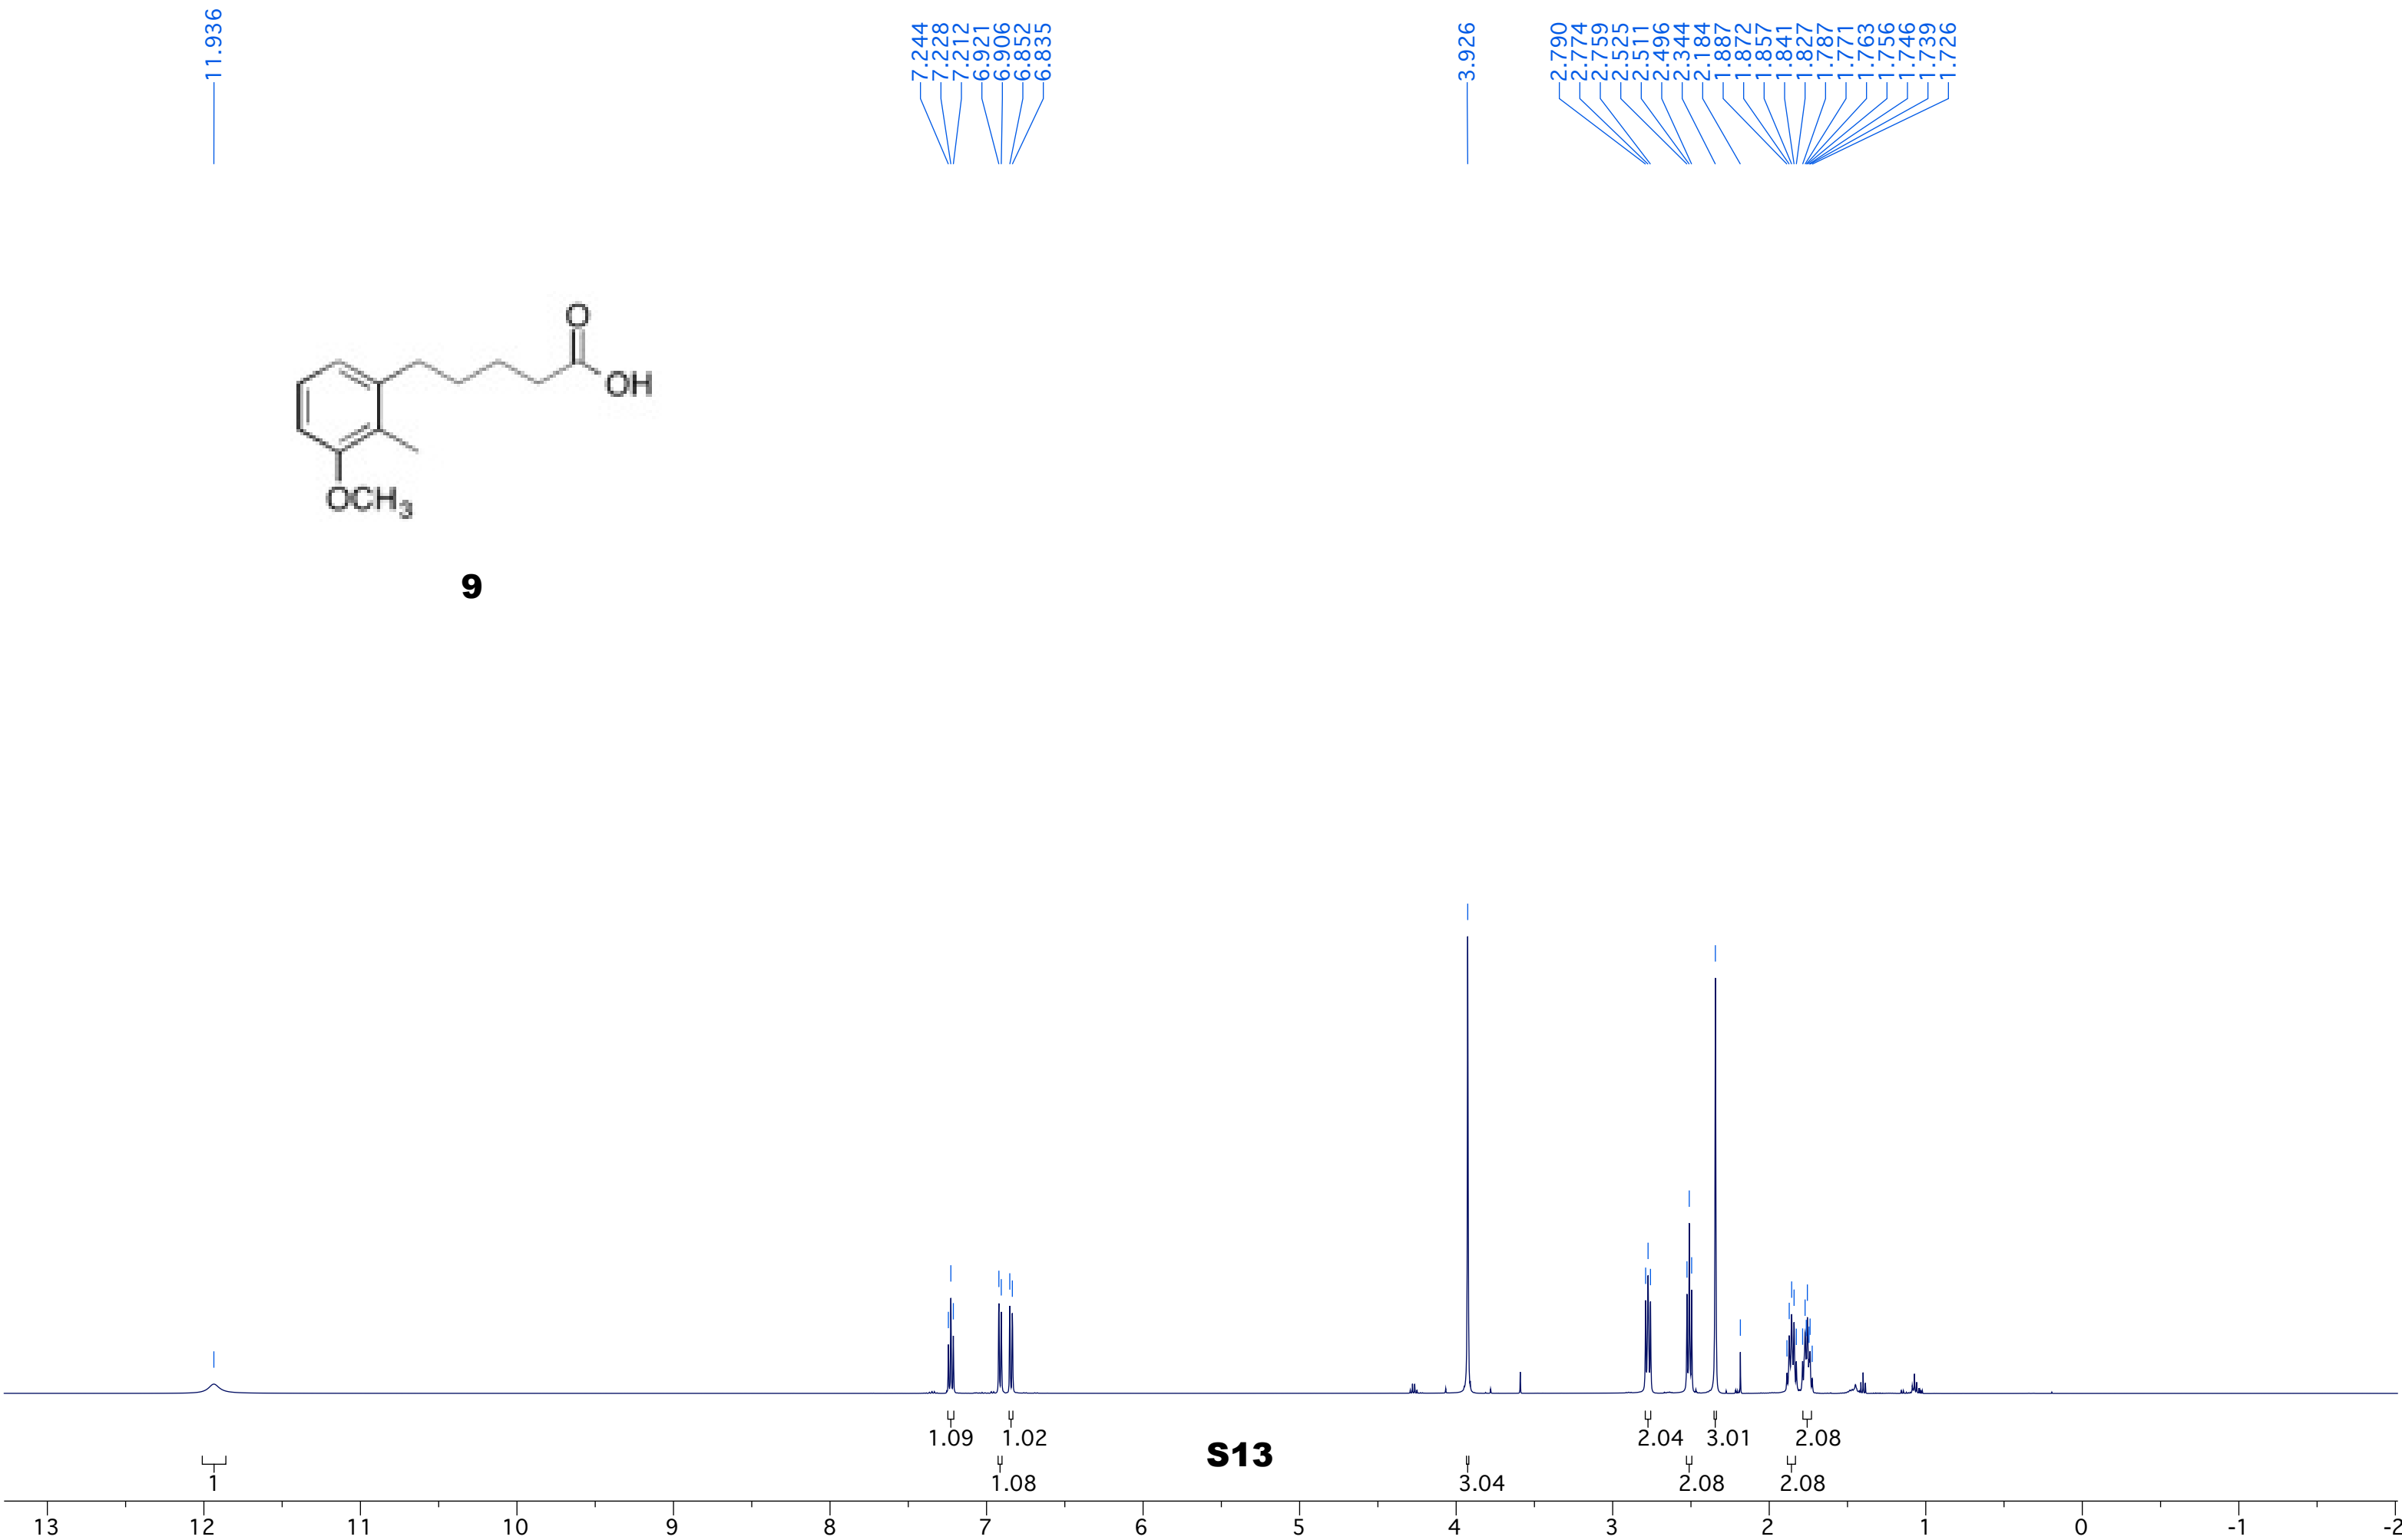

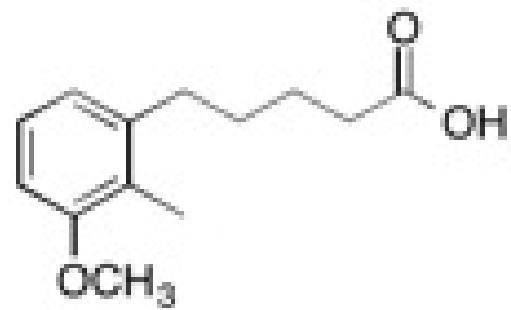

**9**

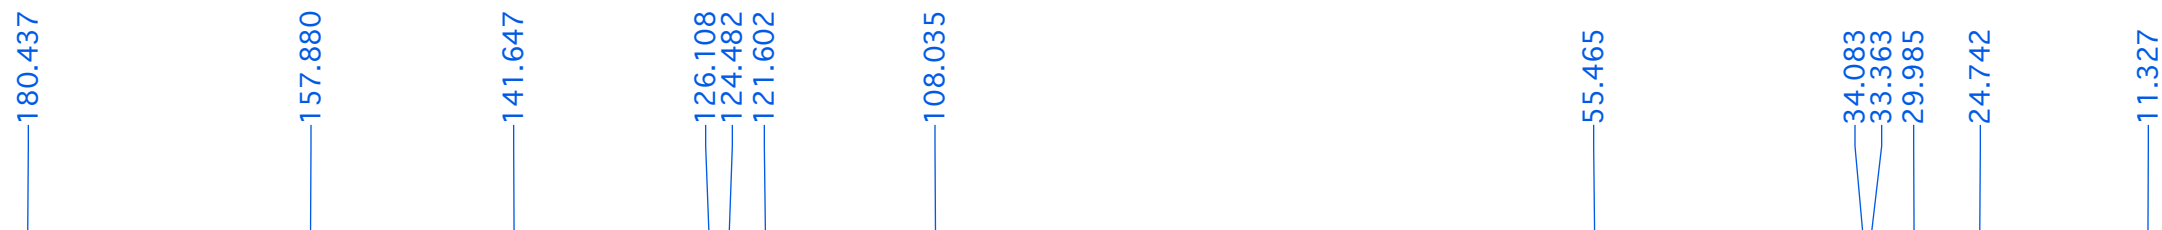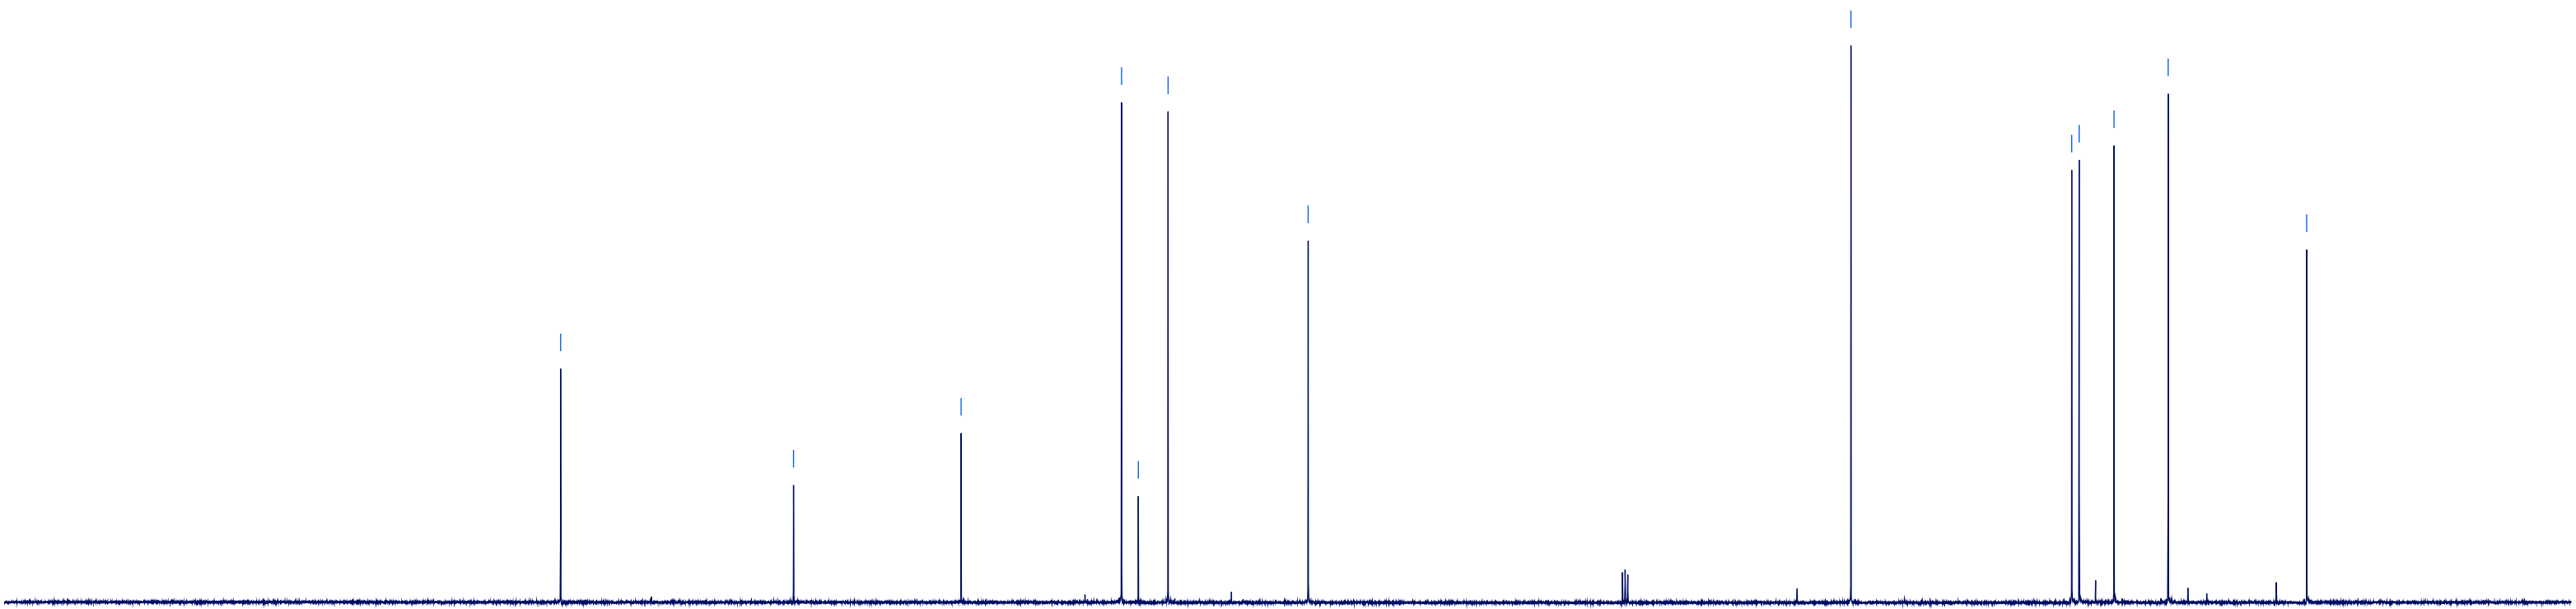

**S14**

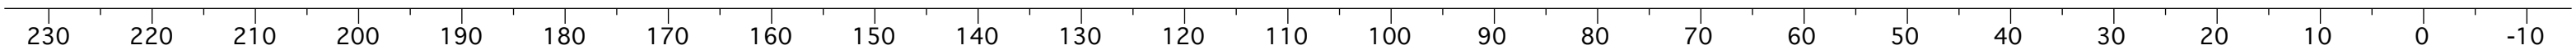

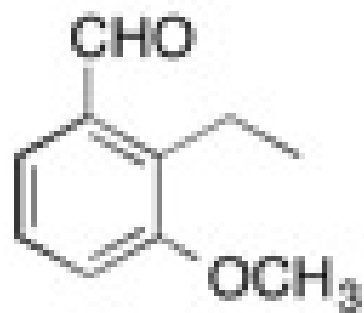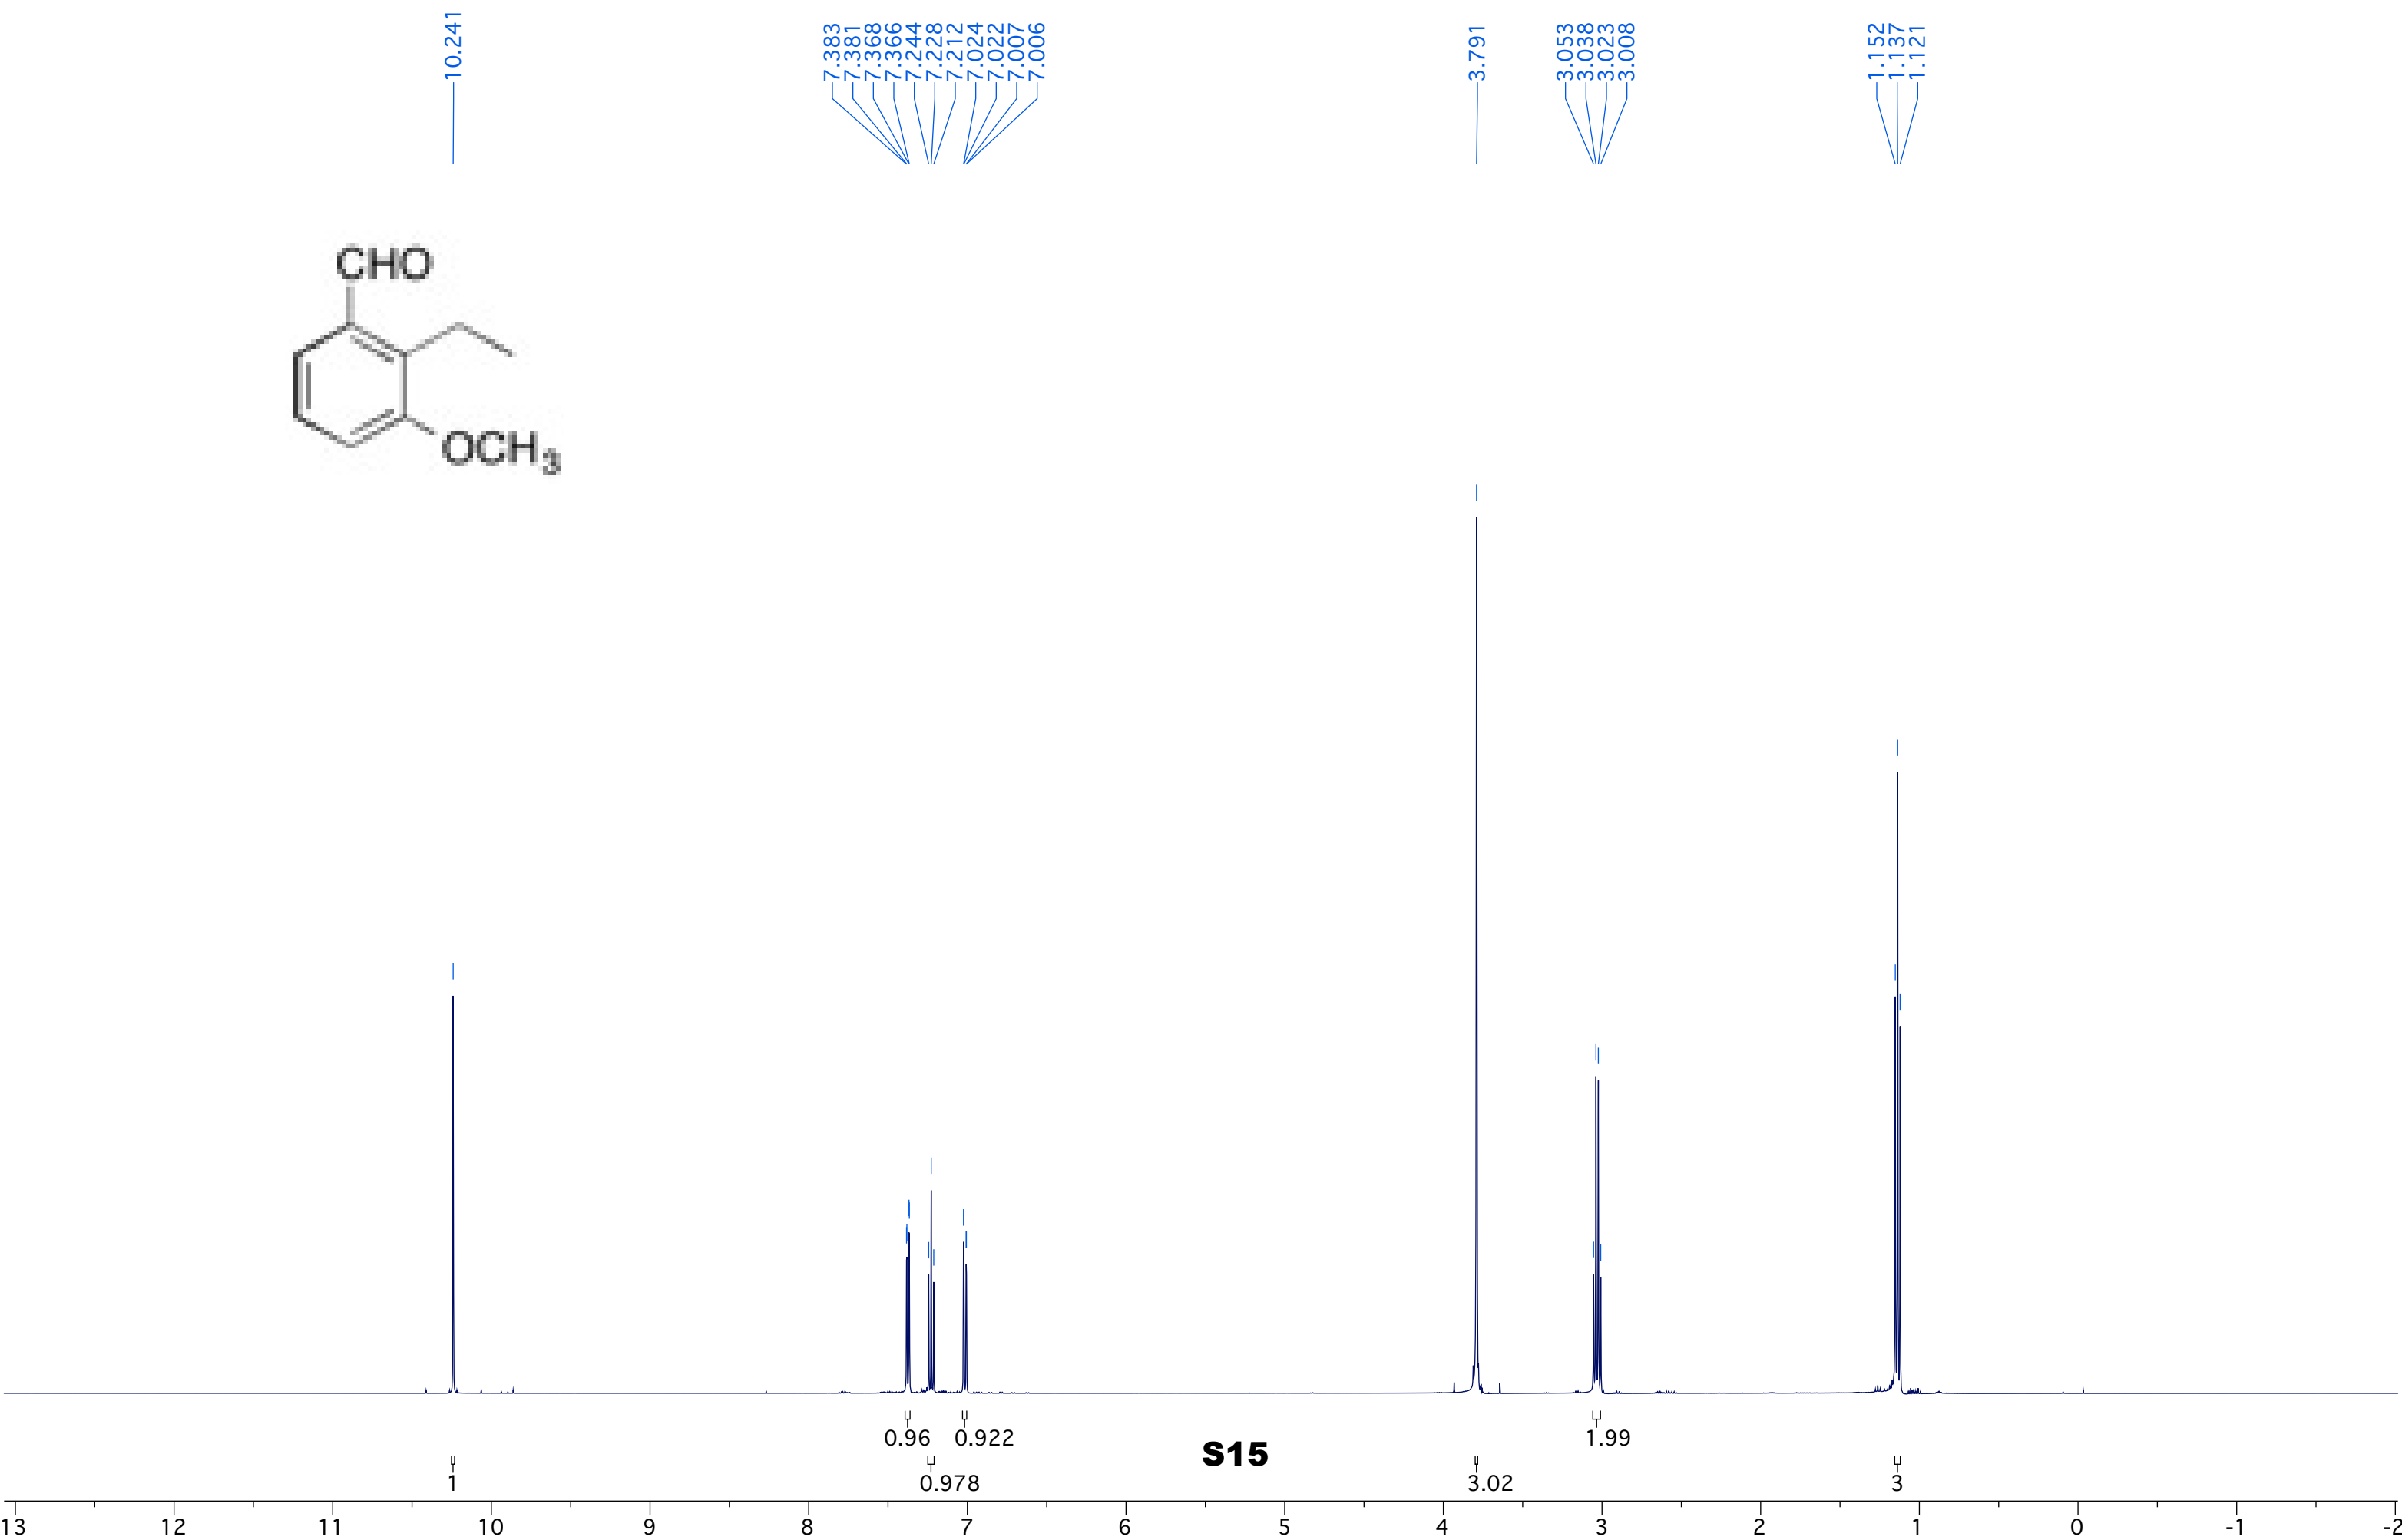

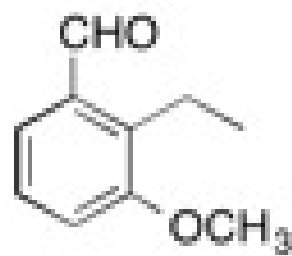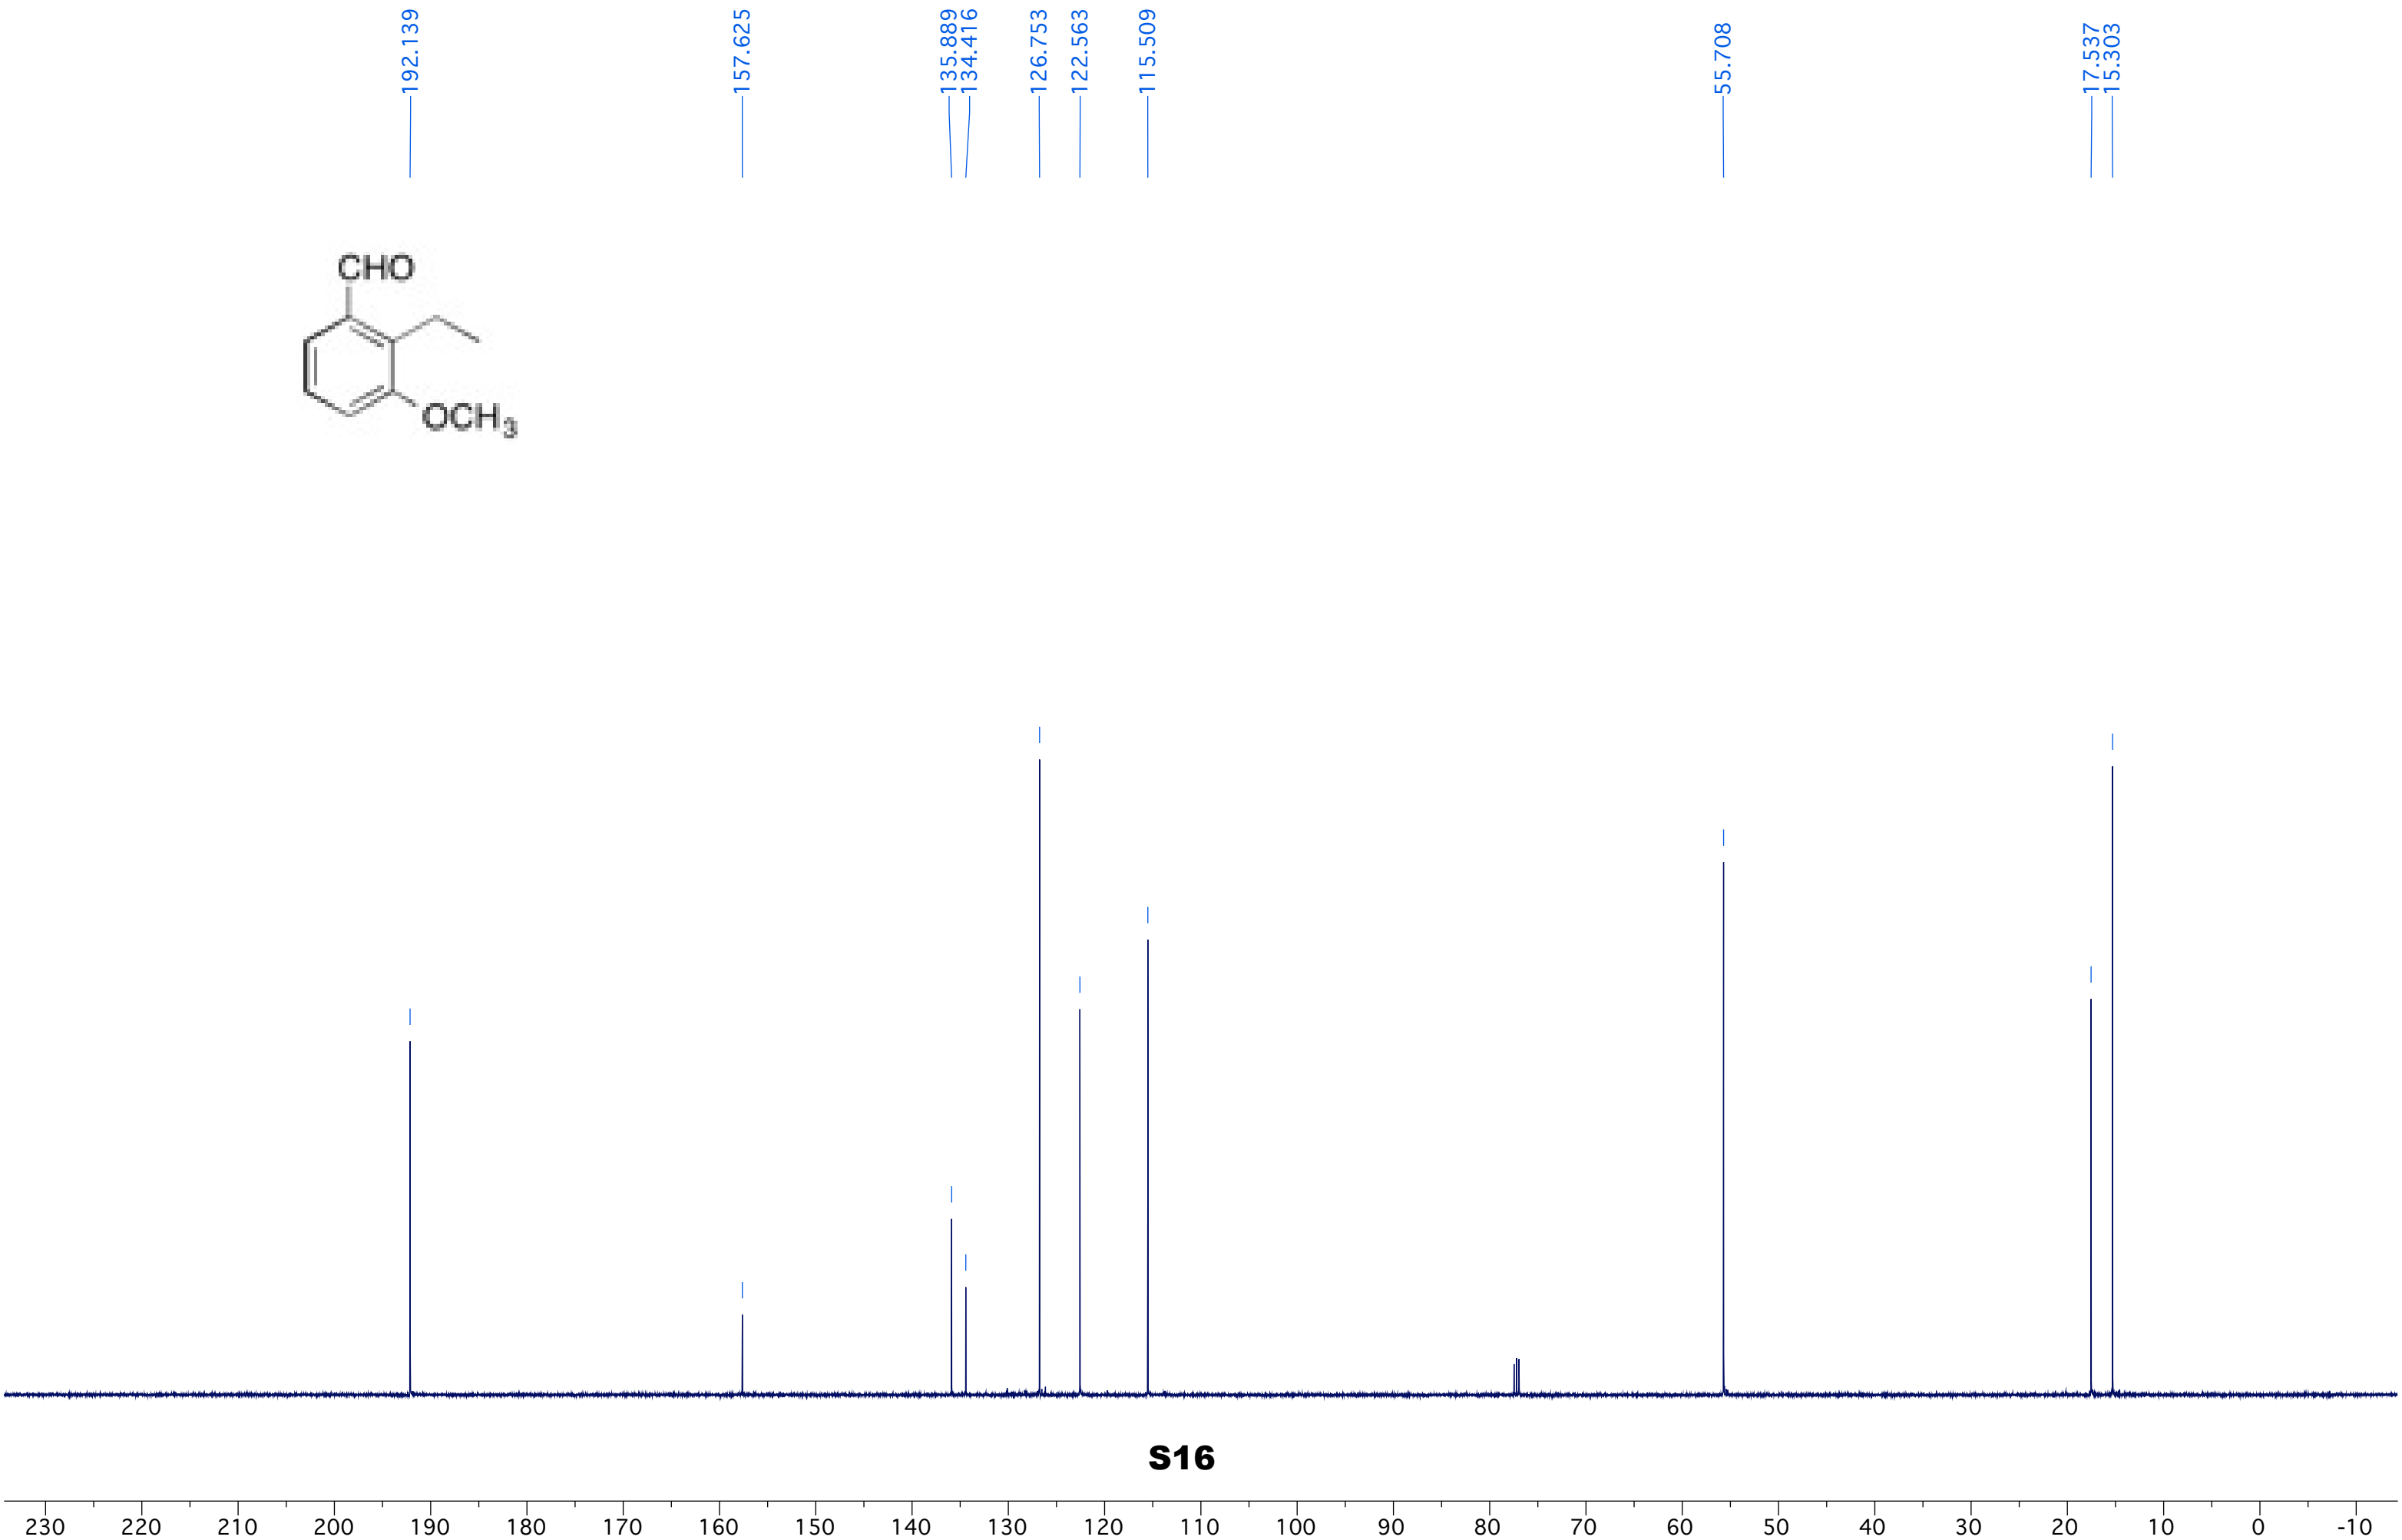



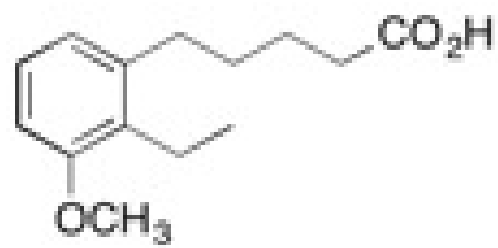

**10**

7.154  
7.138  
7.122  
6.837  
6.822  
6.763  
6.746

3.828  
3.698  
2.792  
2.777  
2.762  
2.747  
2.719  
2.703  
2.687  
2.410  
2.395  
2.380  
1.821  
1.807  
1.791  
1.775  
1.761  
1.714  
1.698  
1.684  
1.666  
1.653  
1.235  
1.220  
1.205

0.976  
1  
1

**S17**

2.76  
2.62

2.02  
1.9  
1.87

2.02  
1.9

3

12

11

10

9

8

7

6

5

4

3

2

1

0

-1

-2

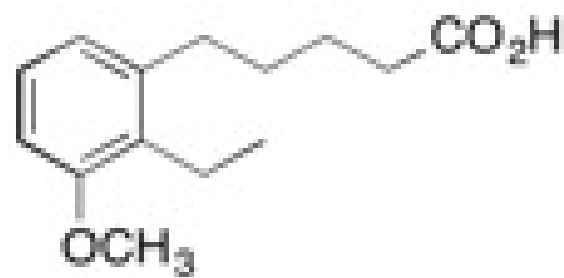

**10**

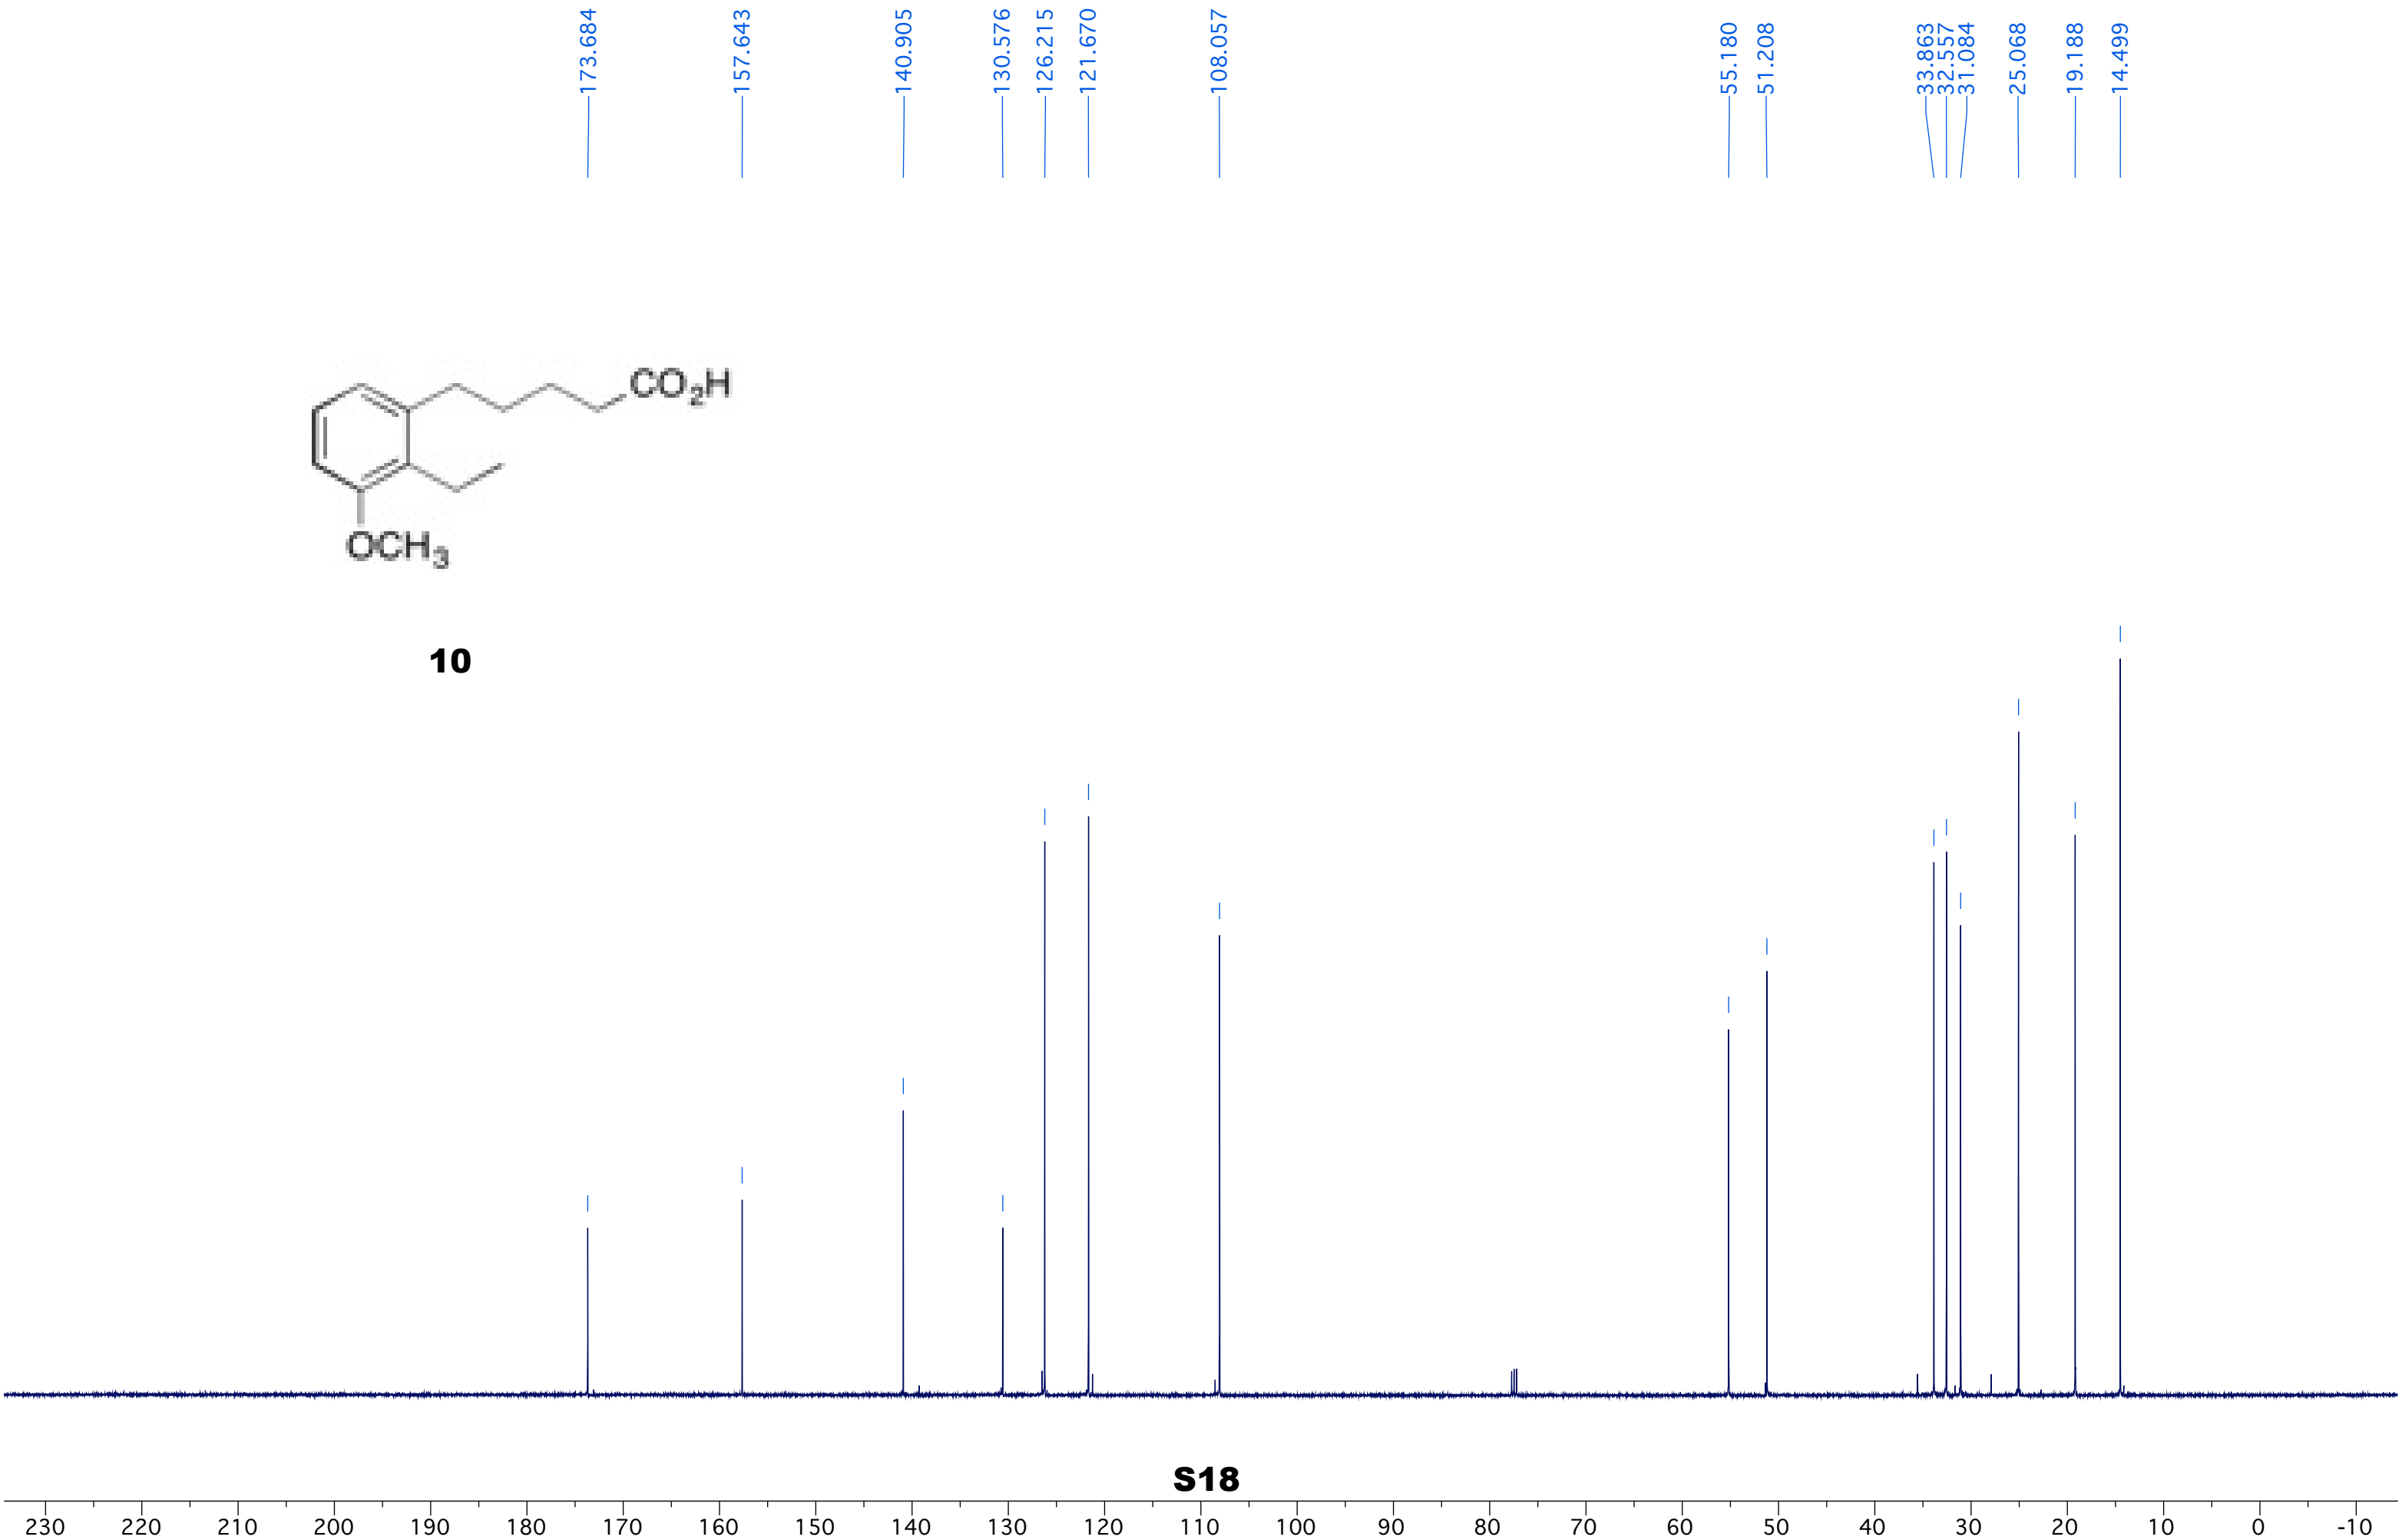

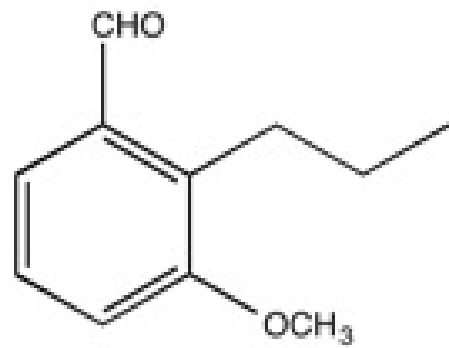

10.189

7.336  
7.320  
7.175  
7.160  
7.144  
6.958  
6.942

3.713

2.952  
2.938  
2.921

1.518  
1.503  
1.488  
1.472  
1.457  
1.444  
0.899  
0.884  
0.869

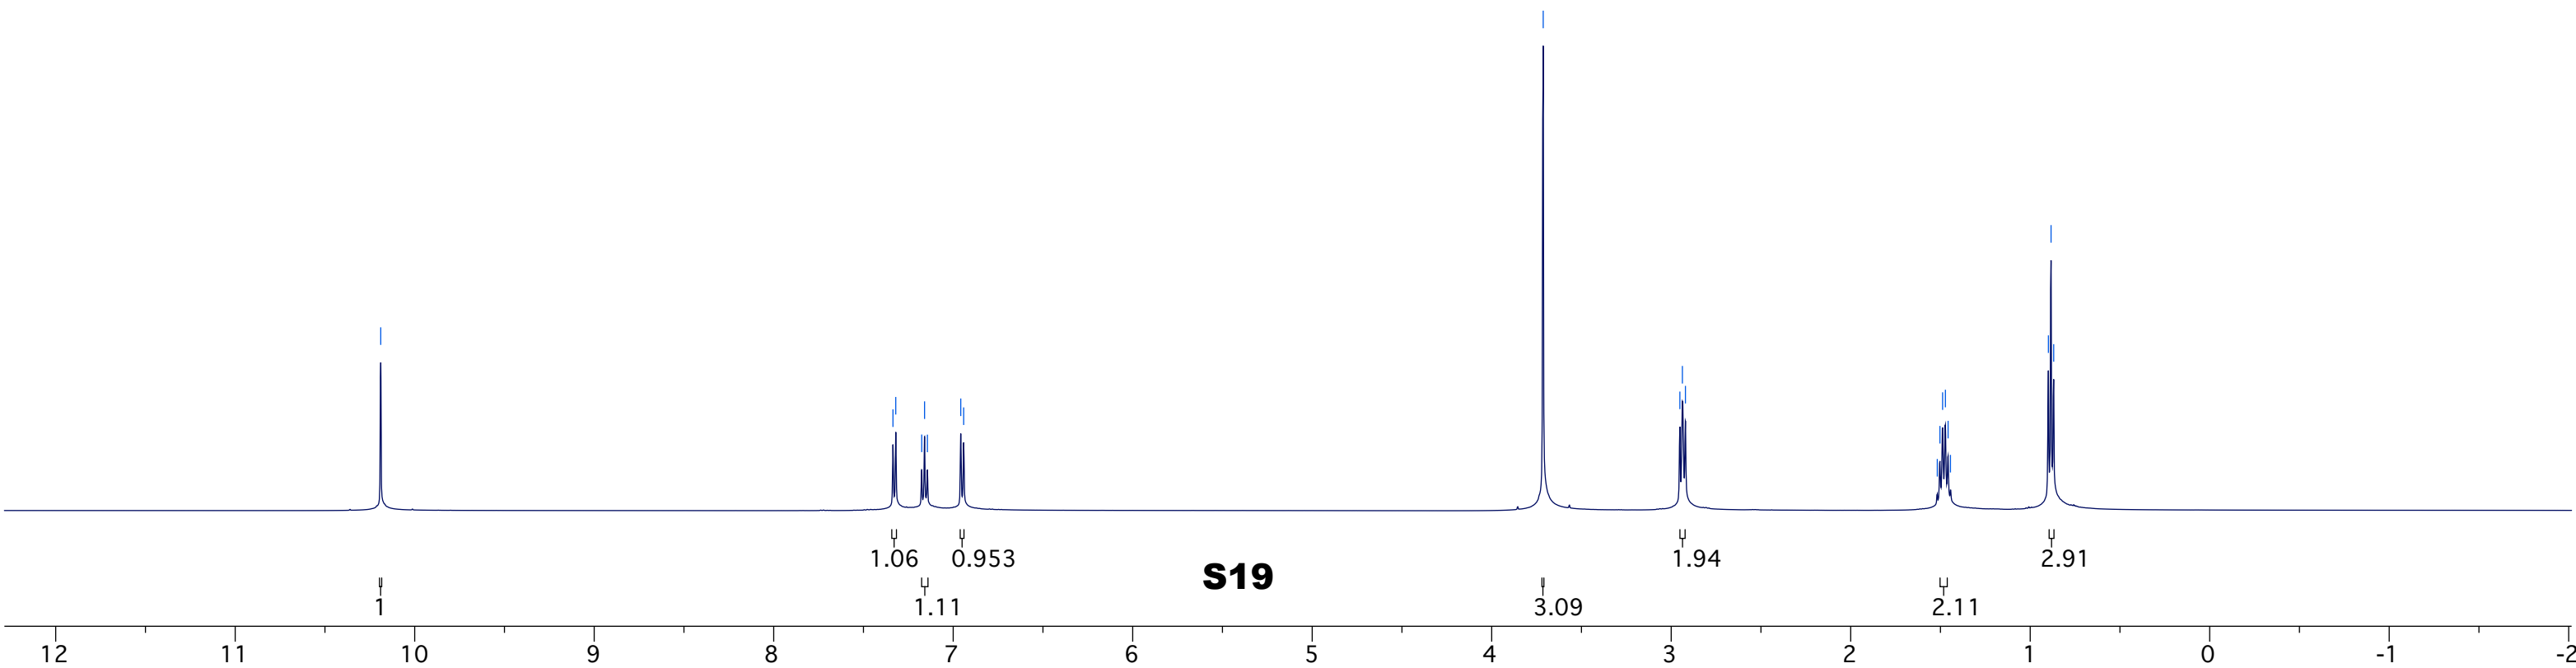

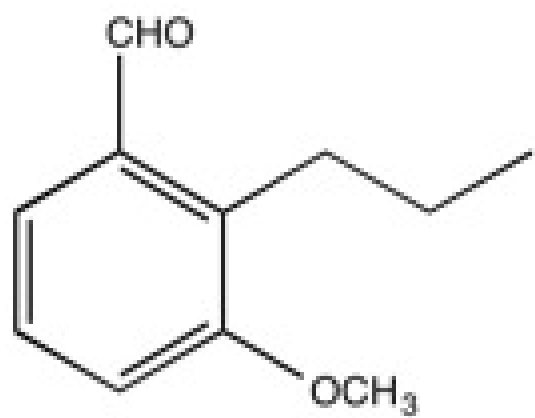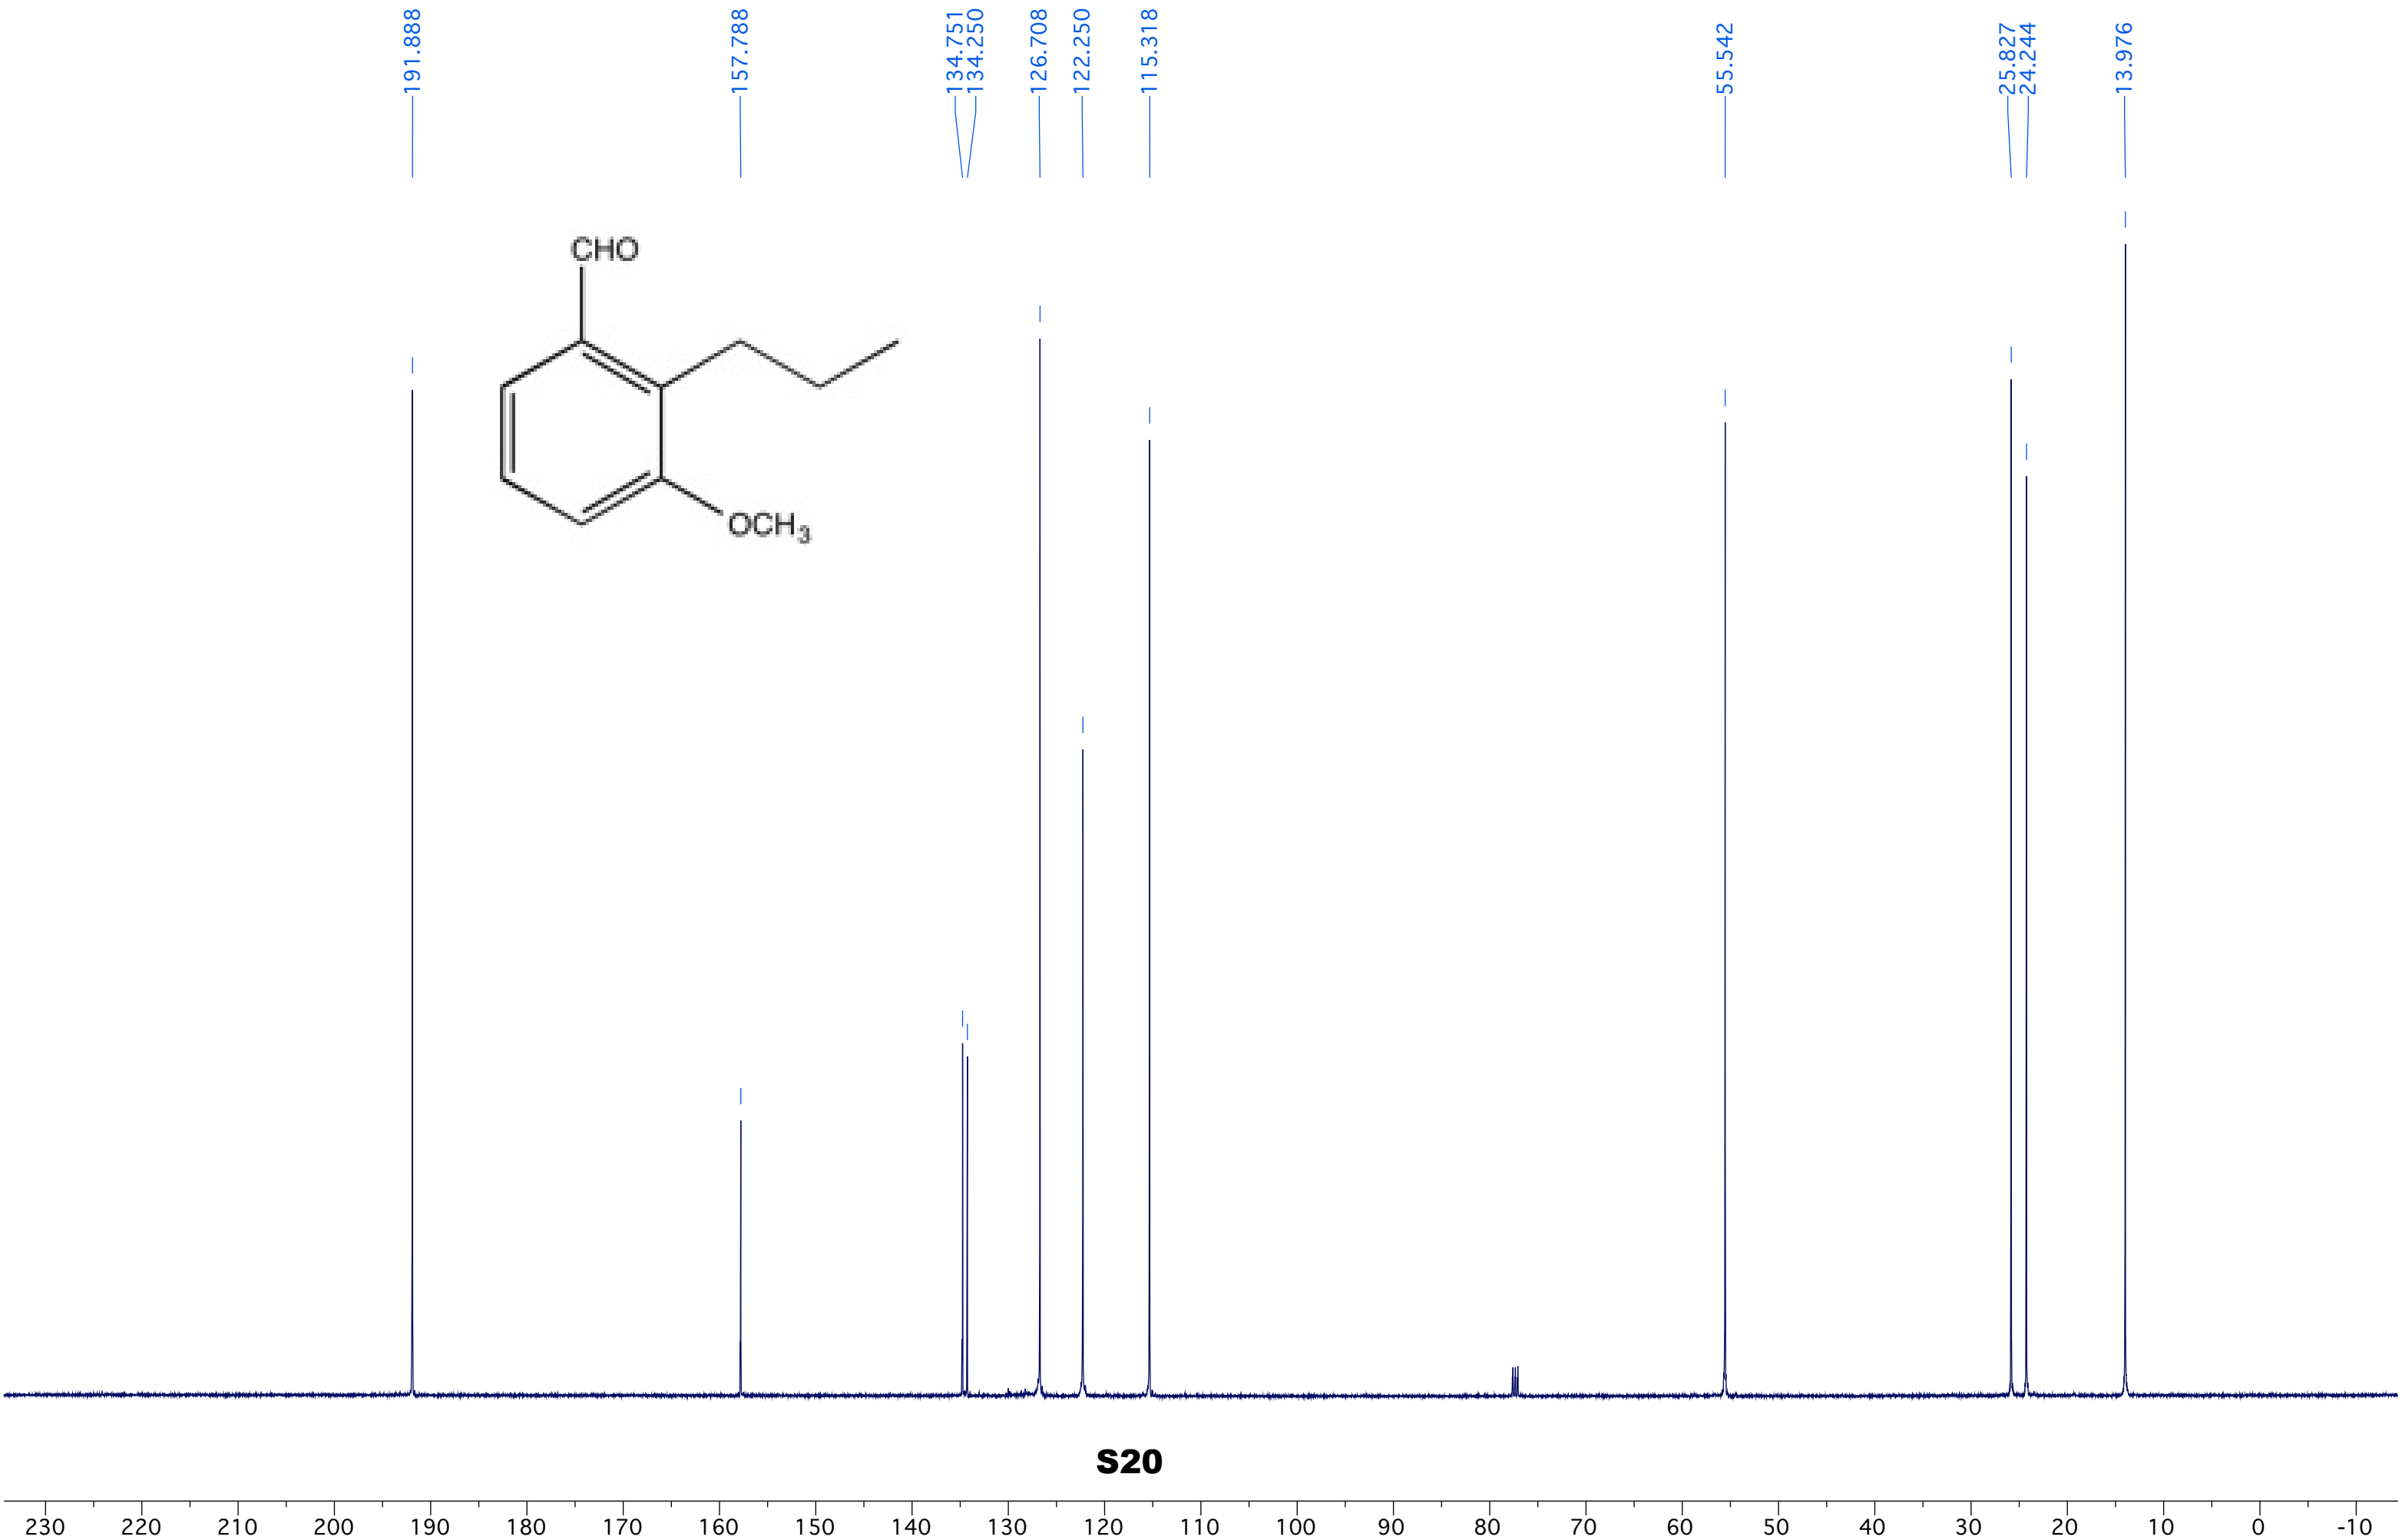

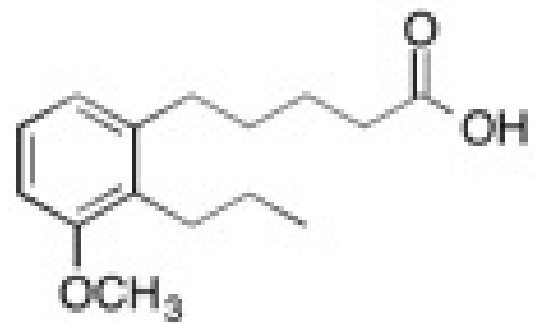

**11**

7.155  
7.139  
7.123  
6.841  
6.840  
6.826  
6.762  
6.746

3.822  
3.705

2.730  
2.719  
2.714  
2.709  
2.704  
2.698  
2.688  
2.414  
2.399  
2.385  
1.824  
1.809  
1.793  
1.778  
1.763  
1.713  
1.701  
1.697  
1.689  
1.682  
1.671  
1.664  
1.663  
1.647  
1.641  
1.631  
1.626  
1.621  
1.615  
1.612  
1.606  
1.600  
1.585  
1.102  
1.087  
1.073

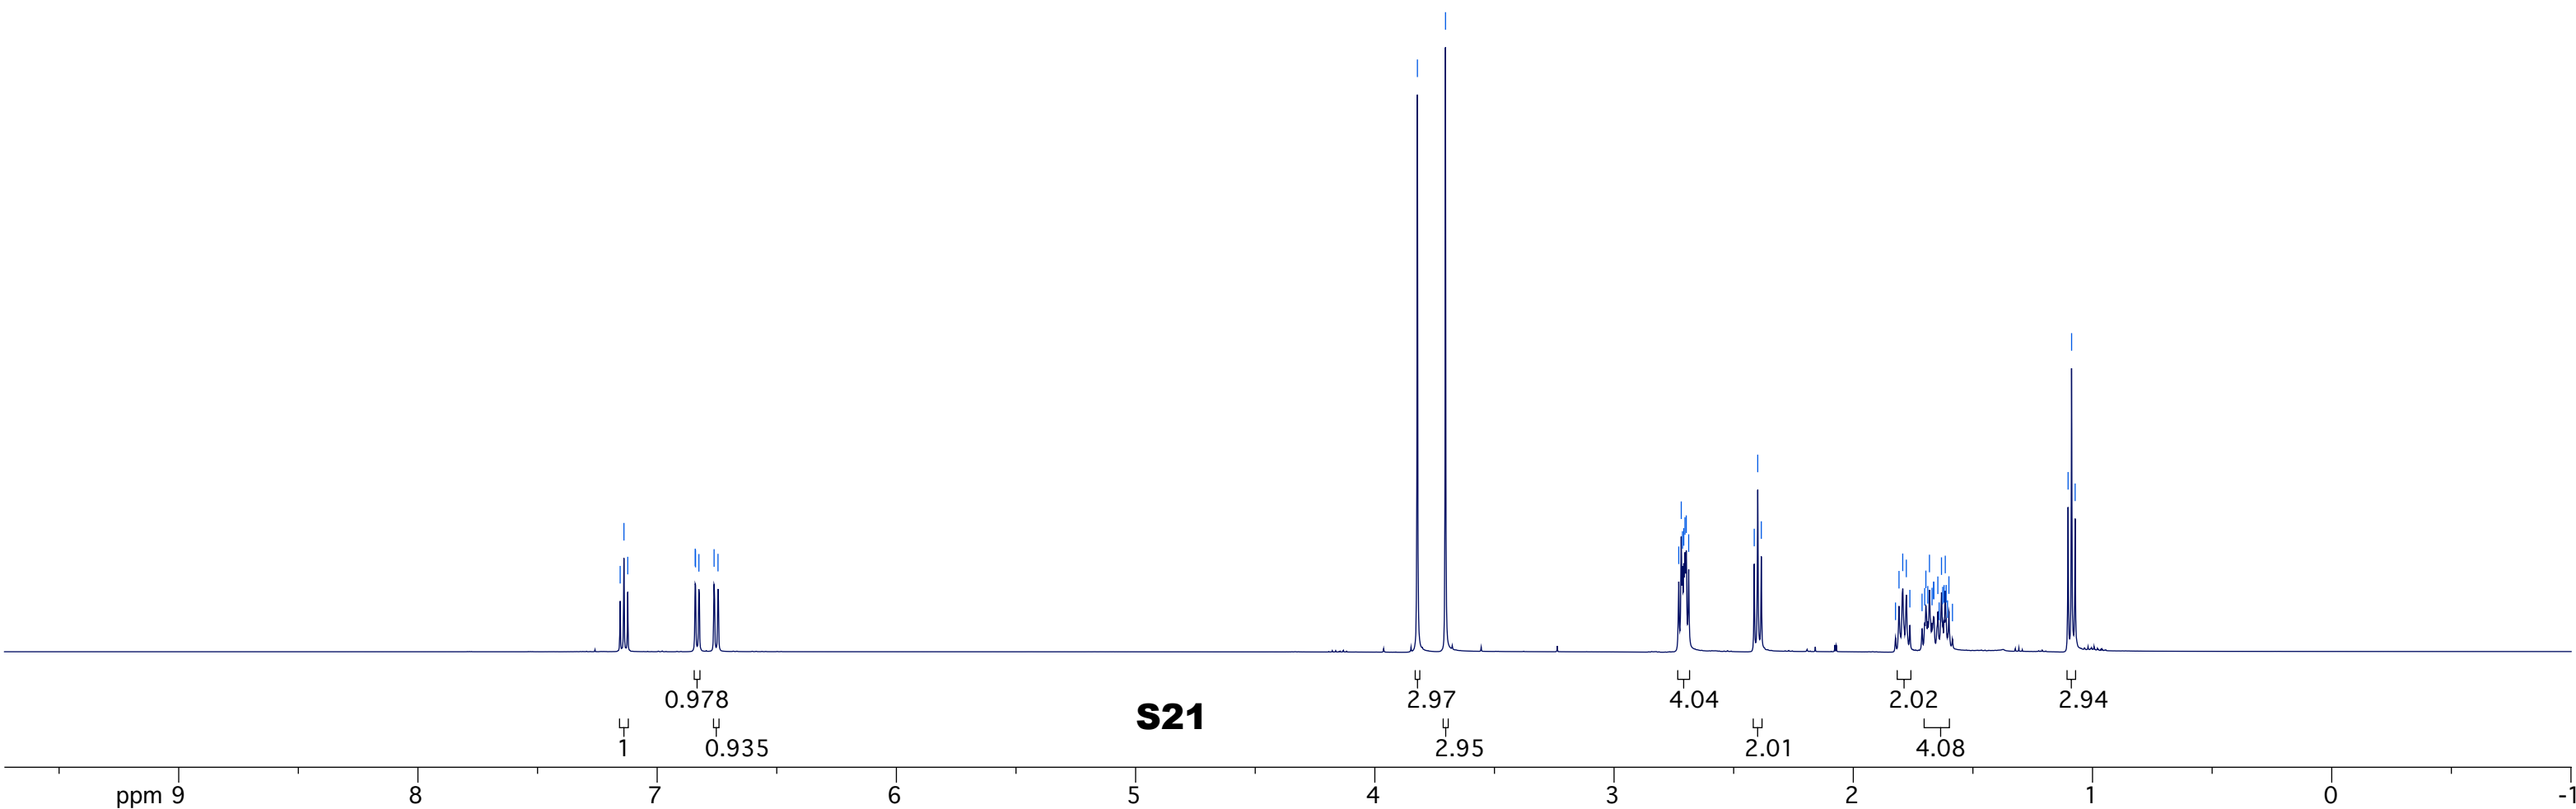

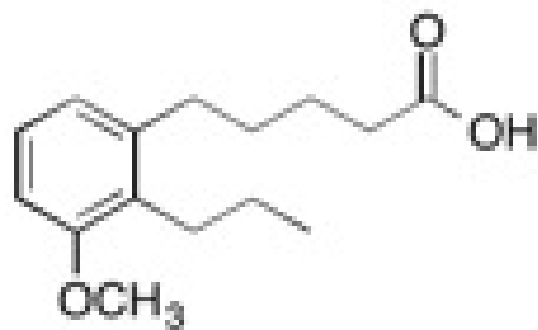

**11**

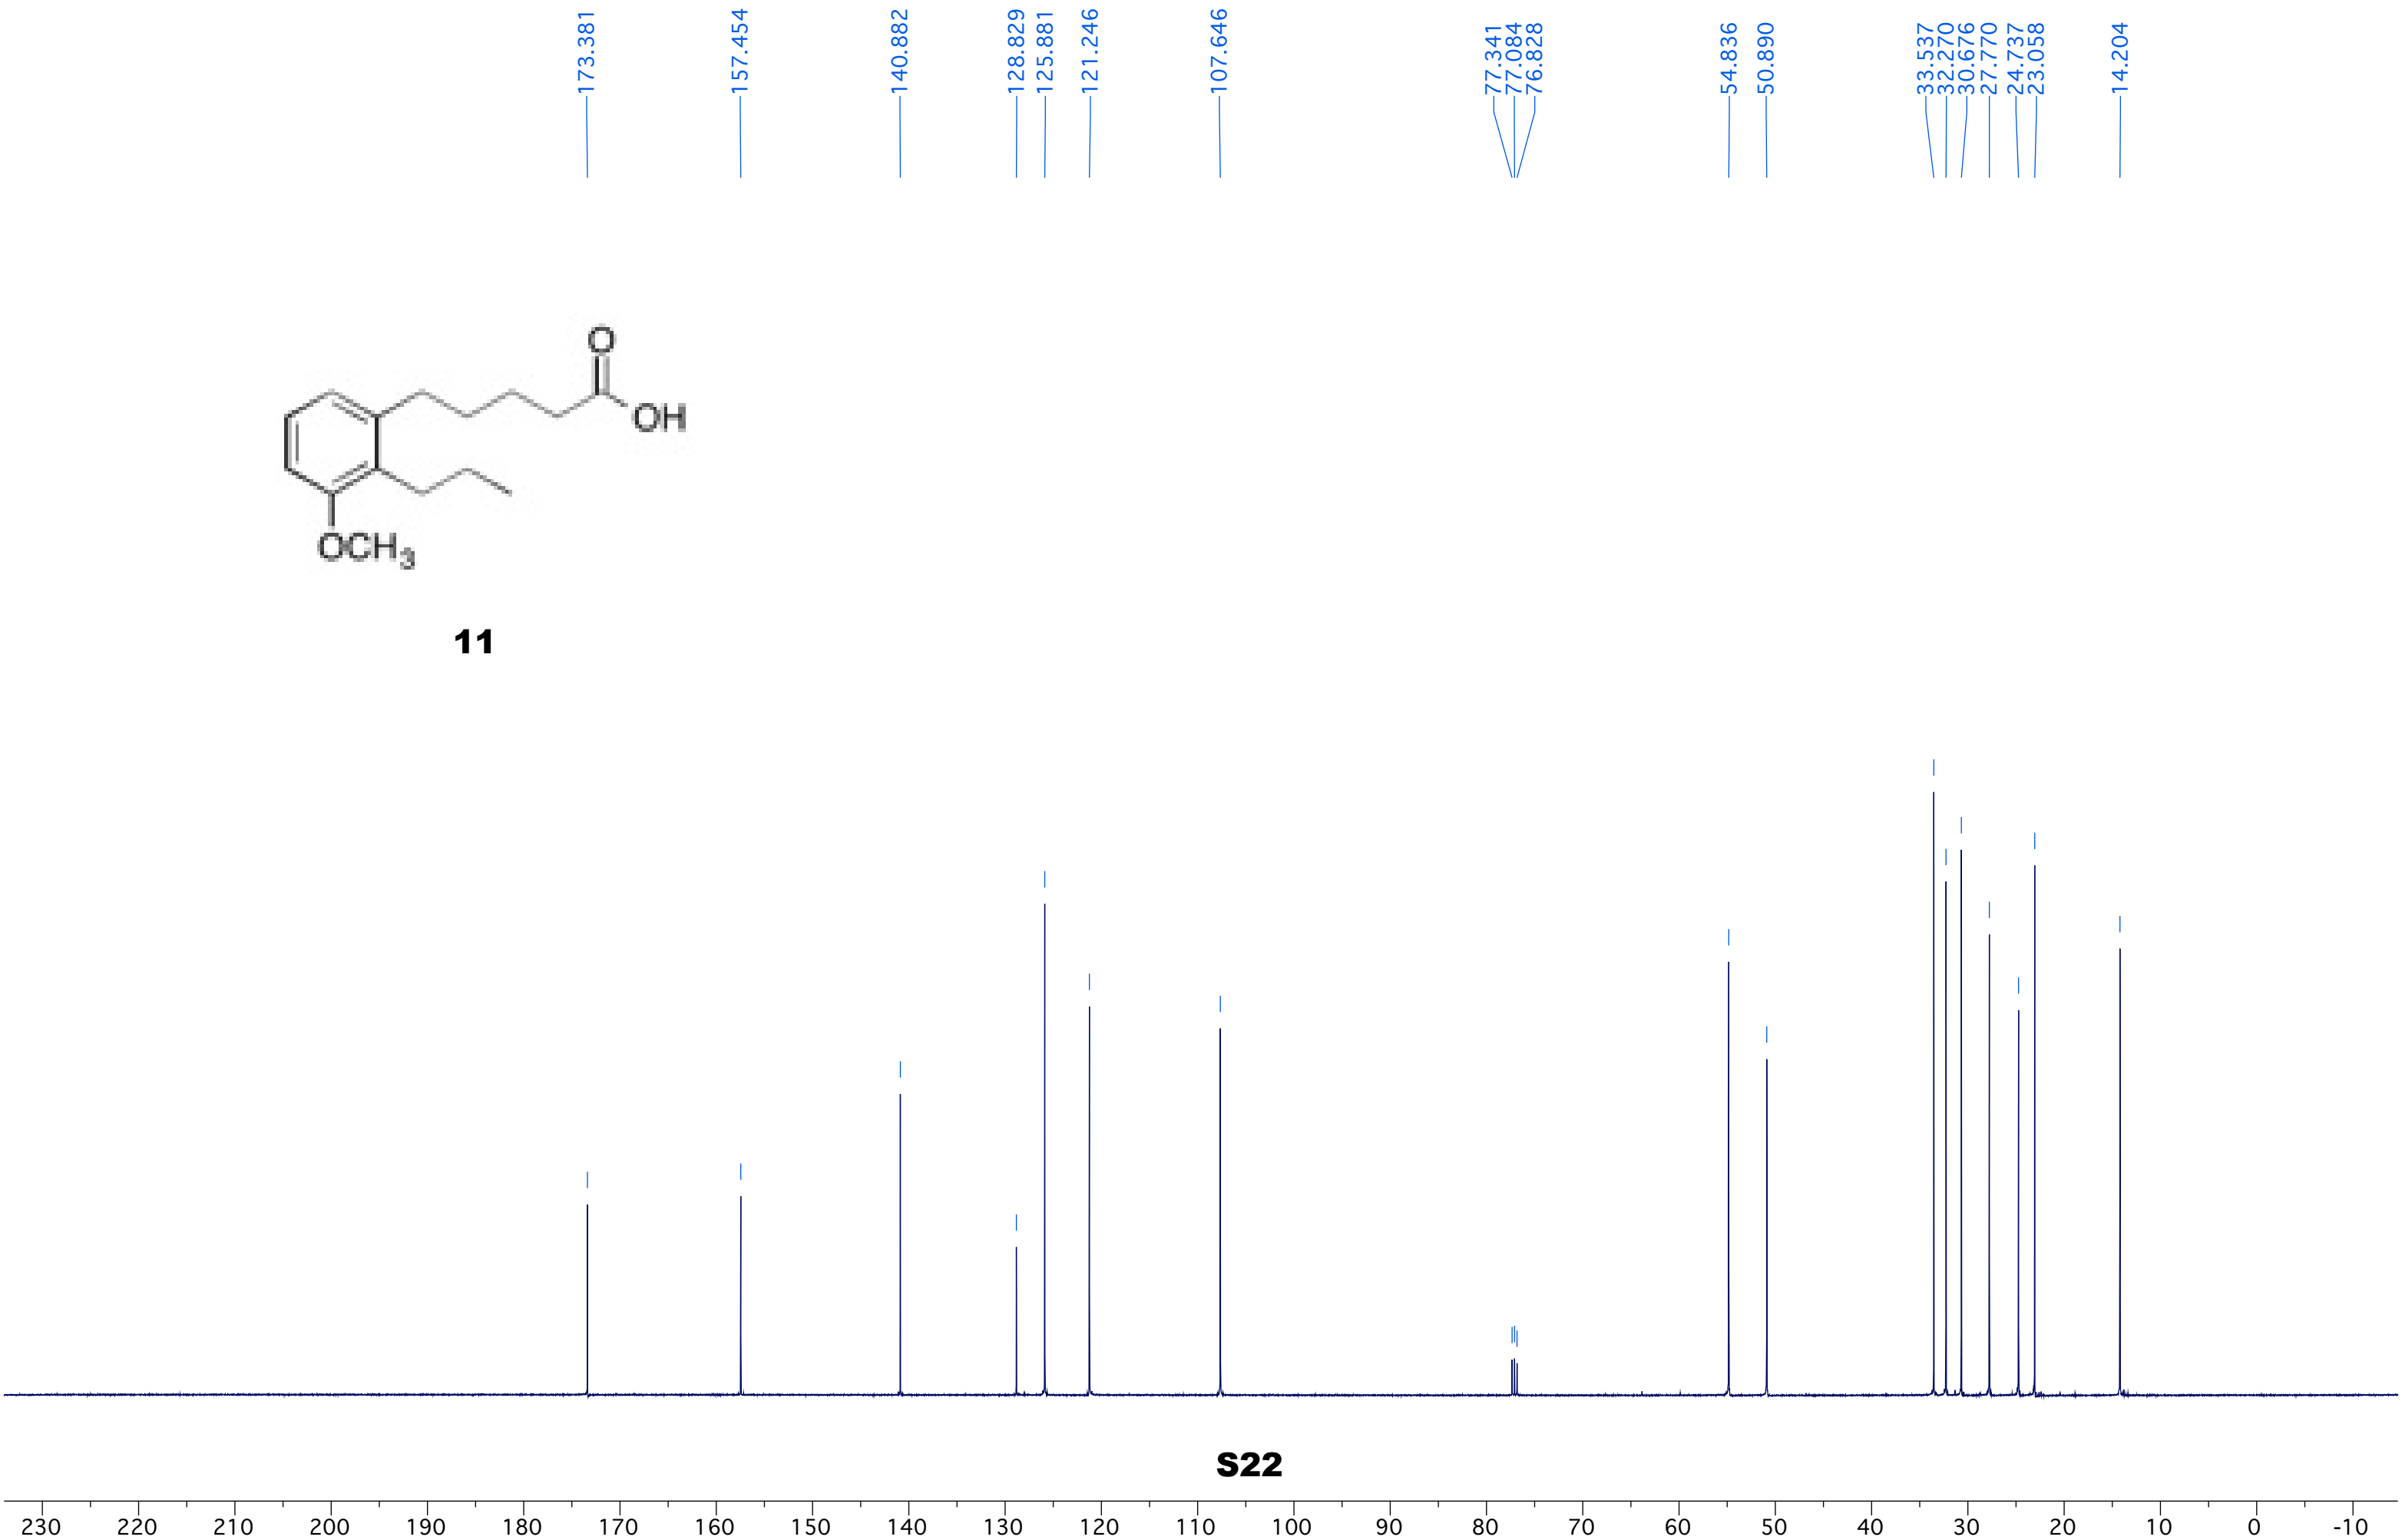

# 5-(2-butyl-3-methoxyphenyl)pentanoic acid

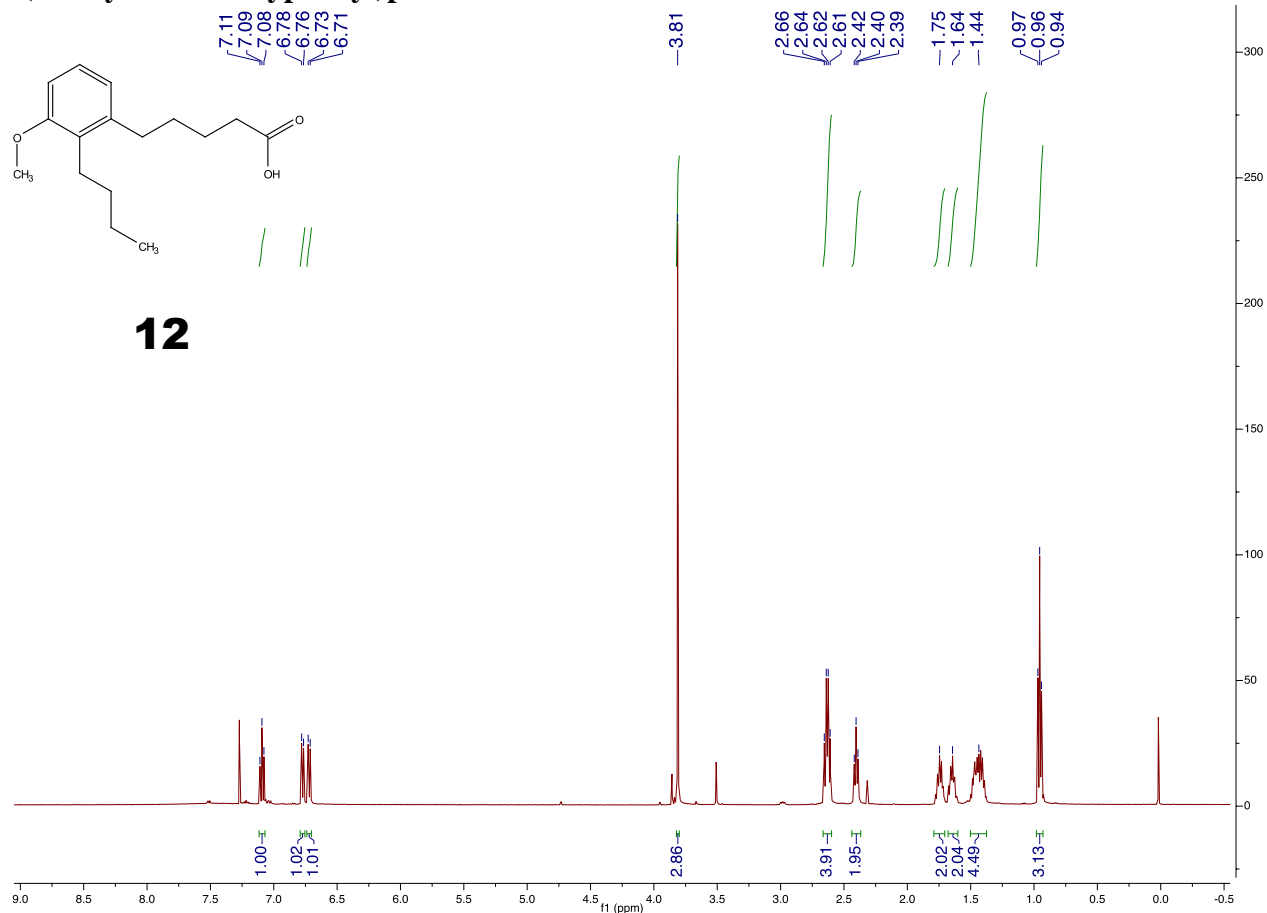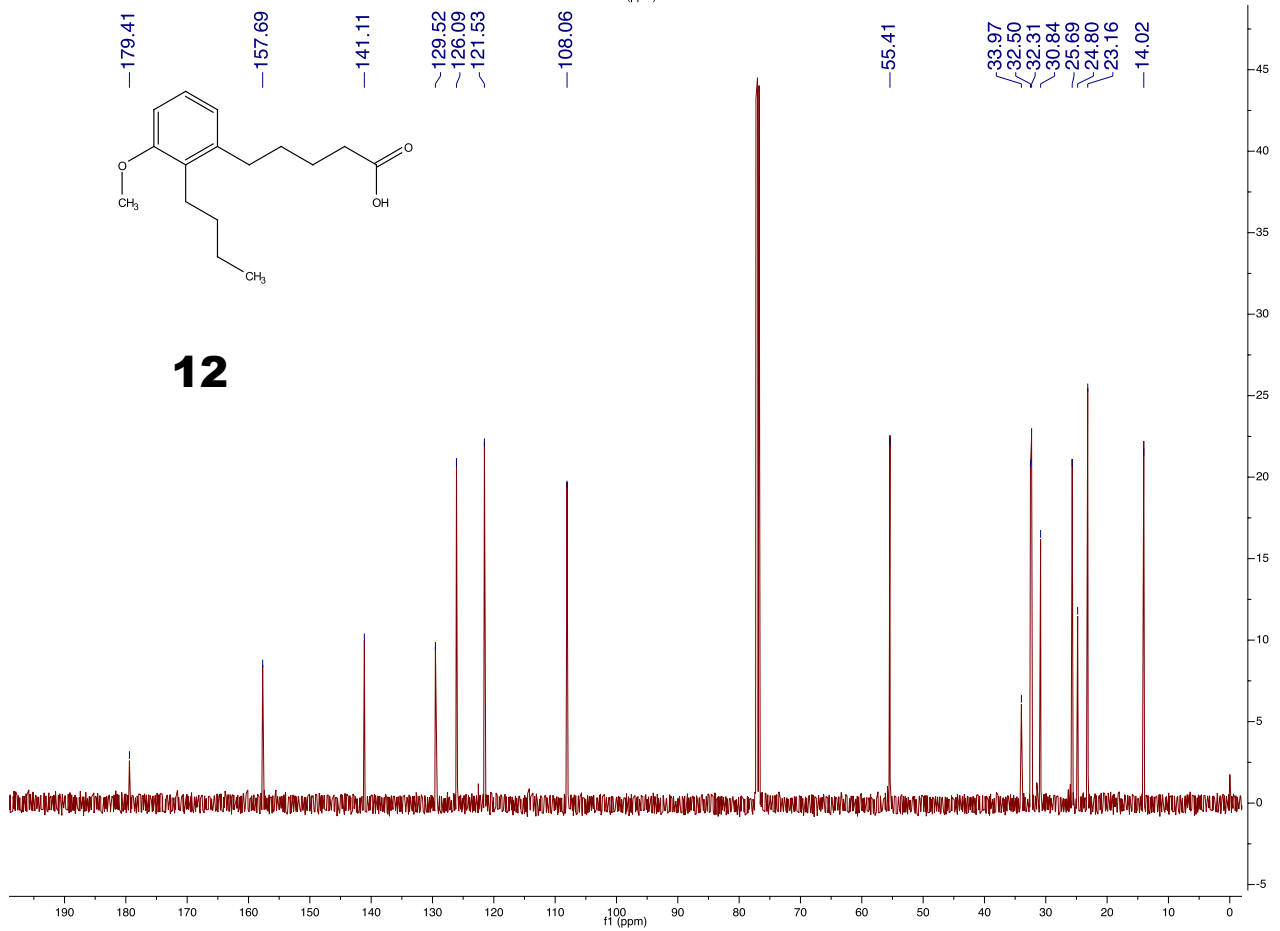

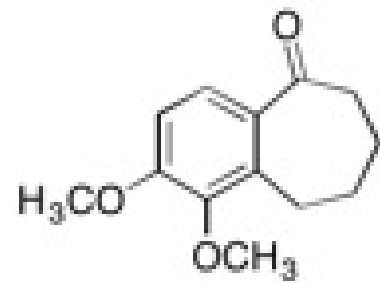

**13**

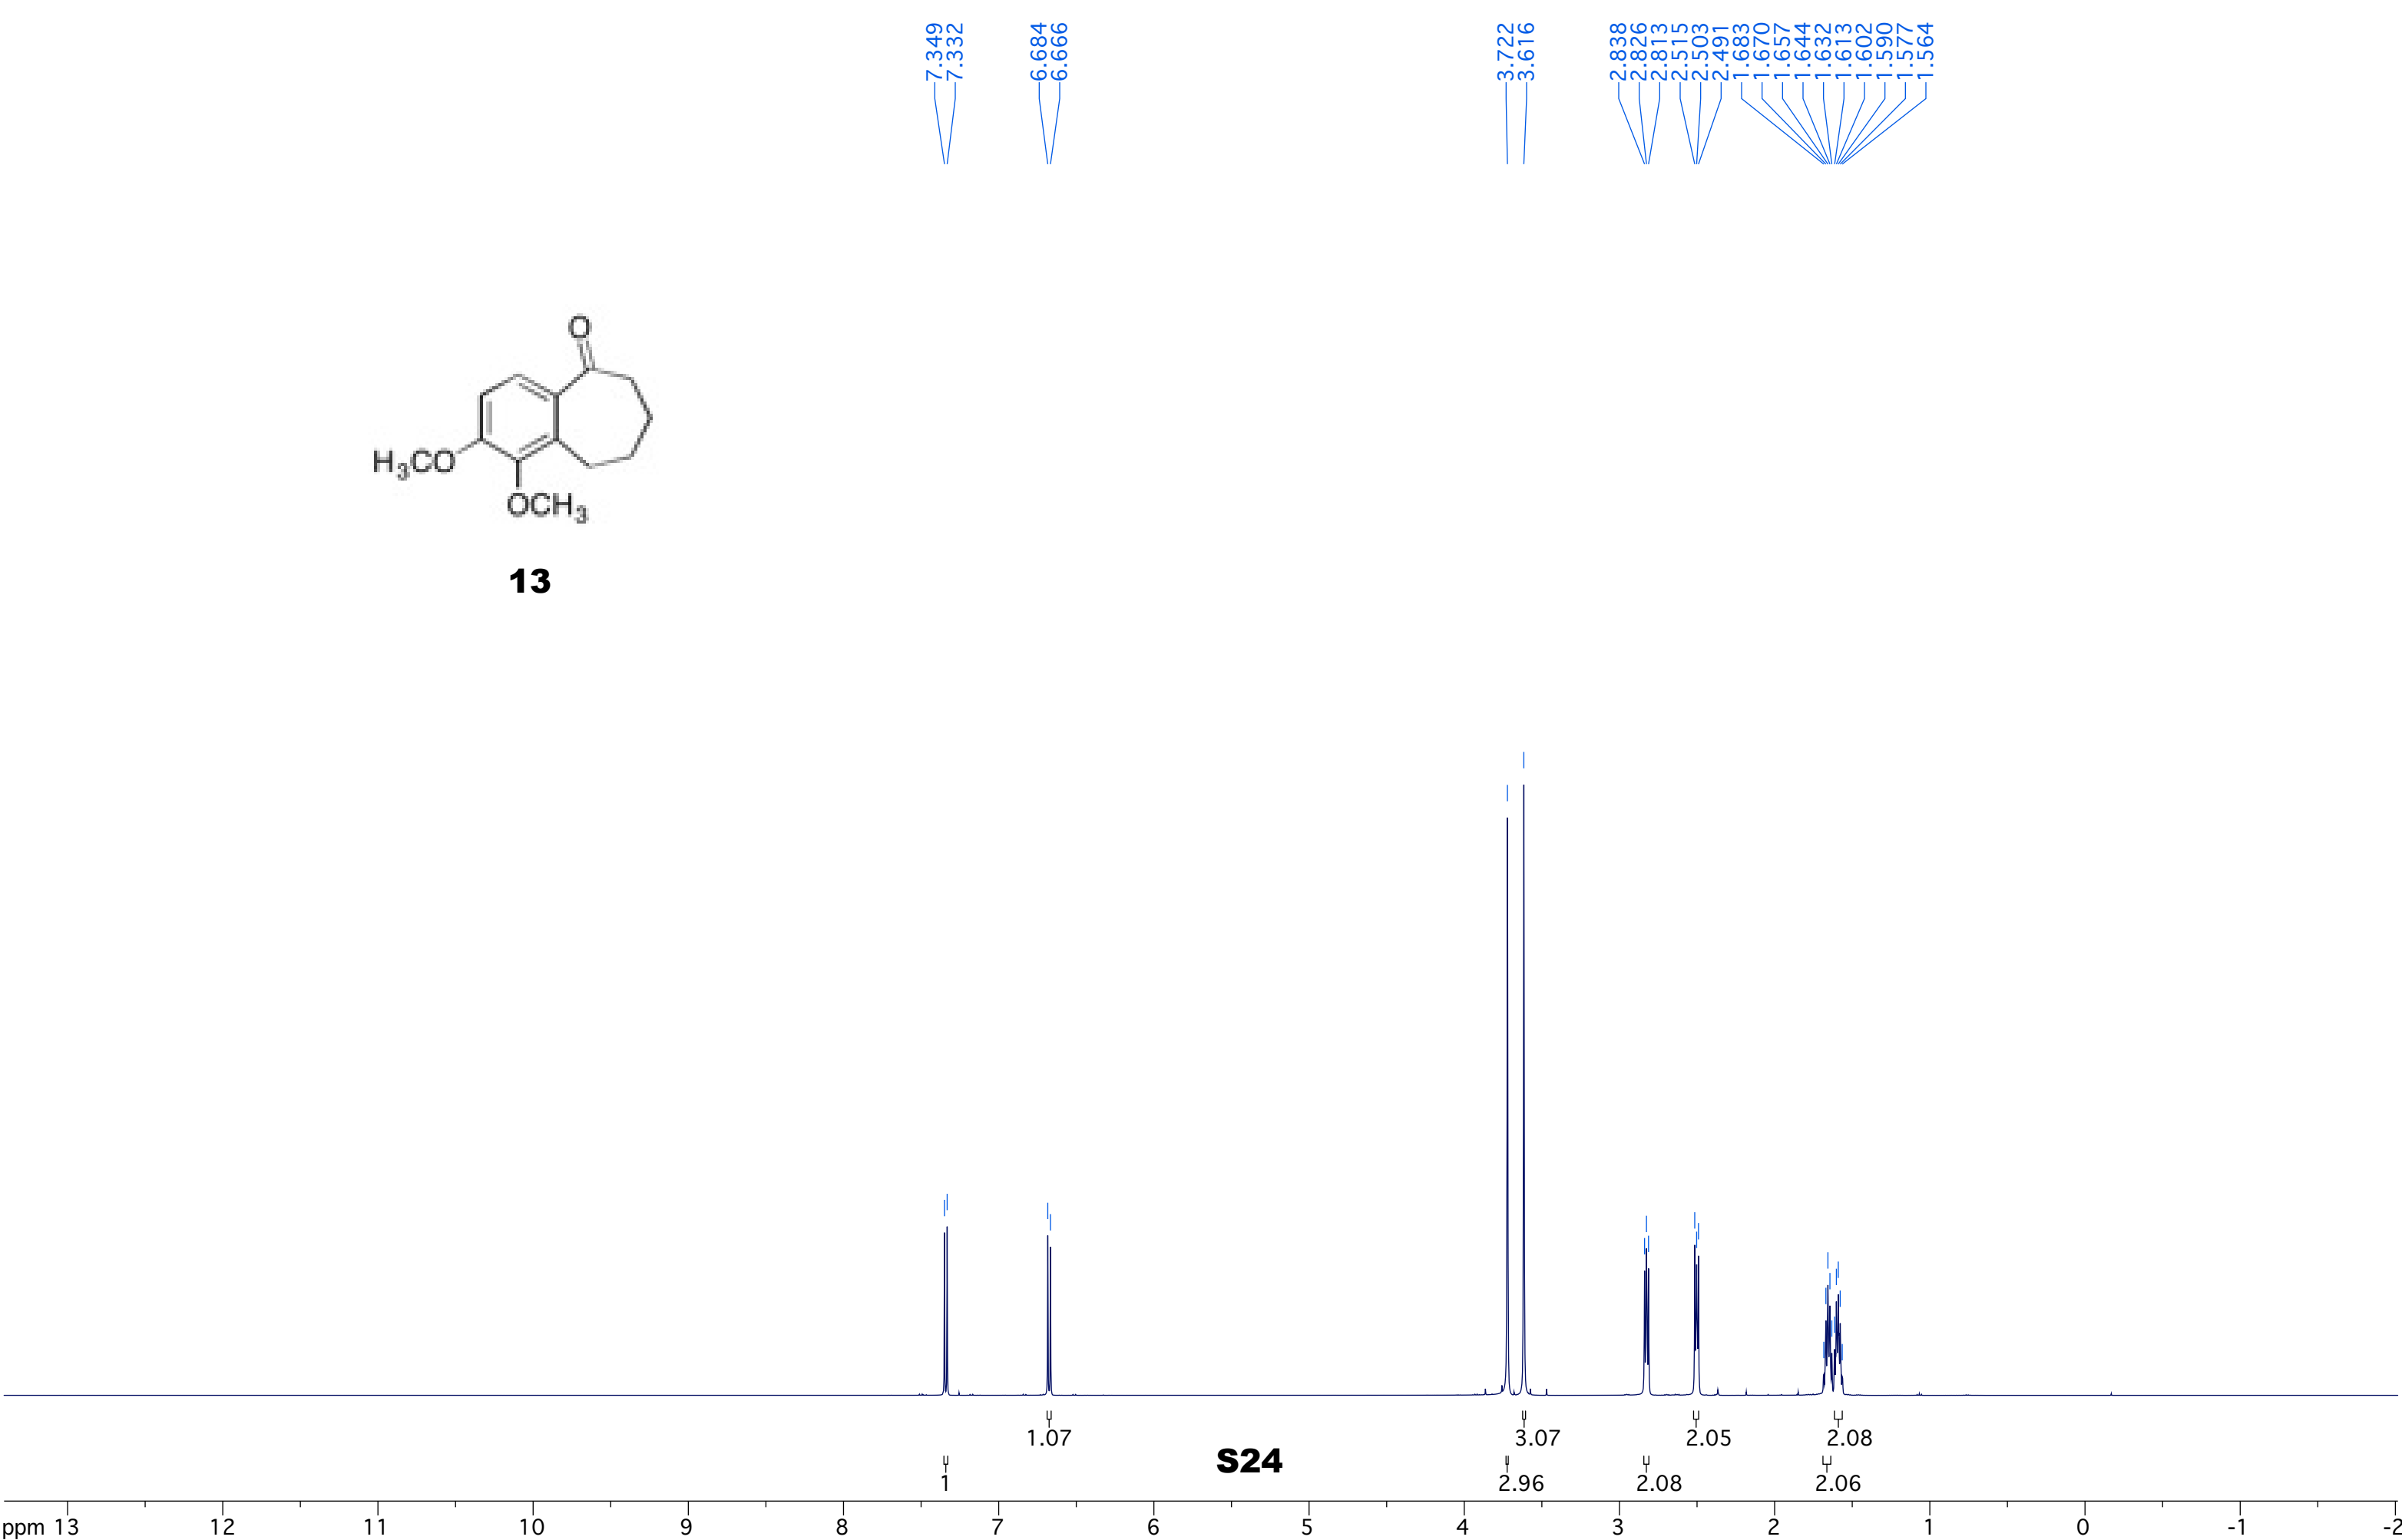



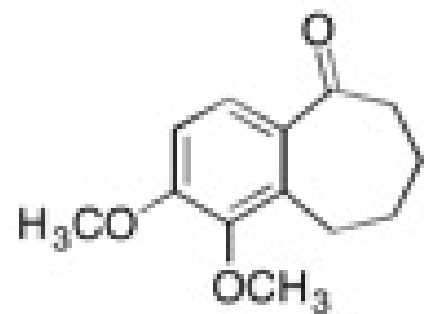

**13**

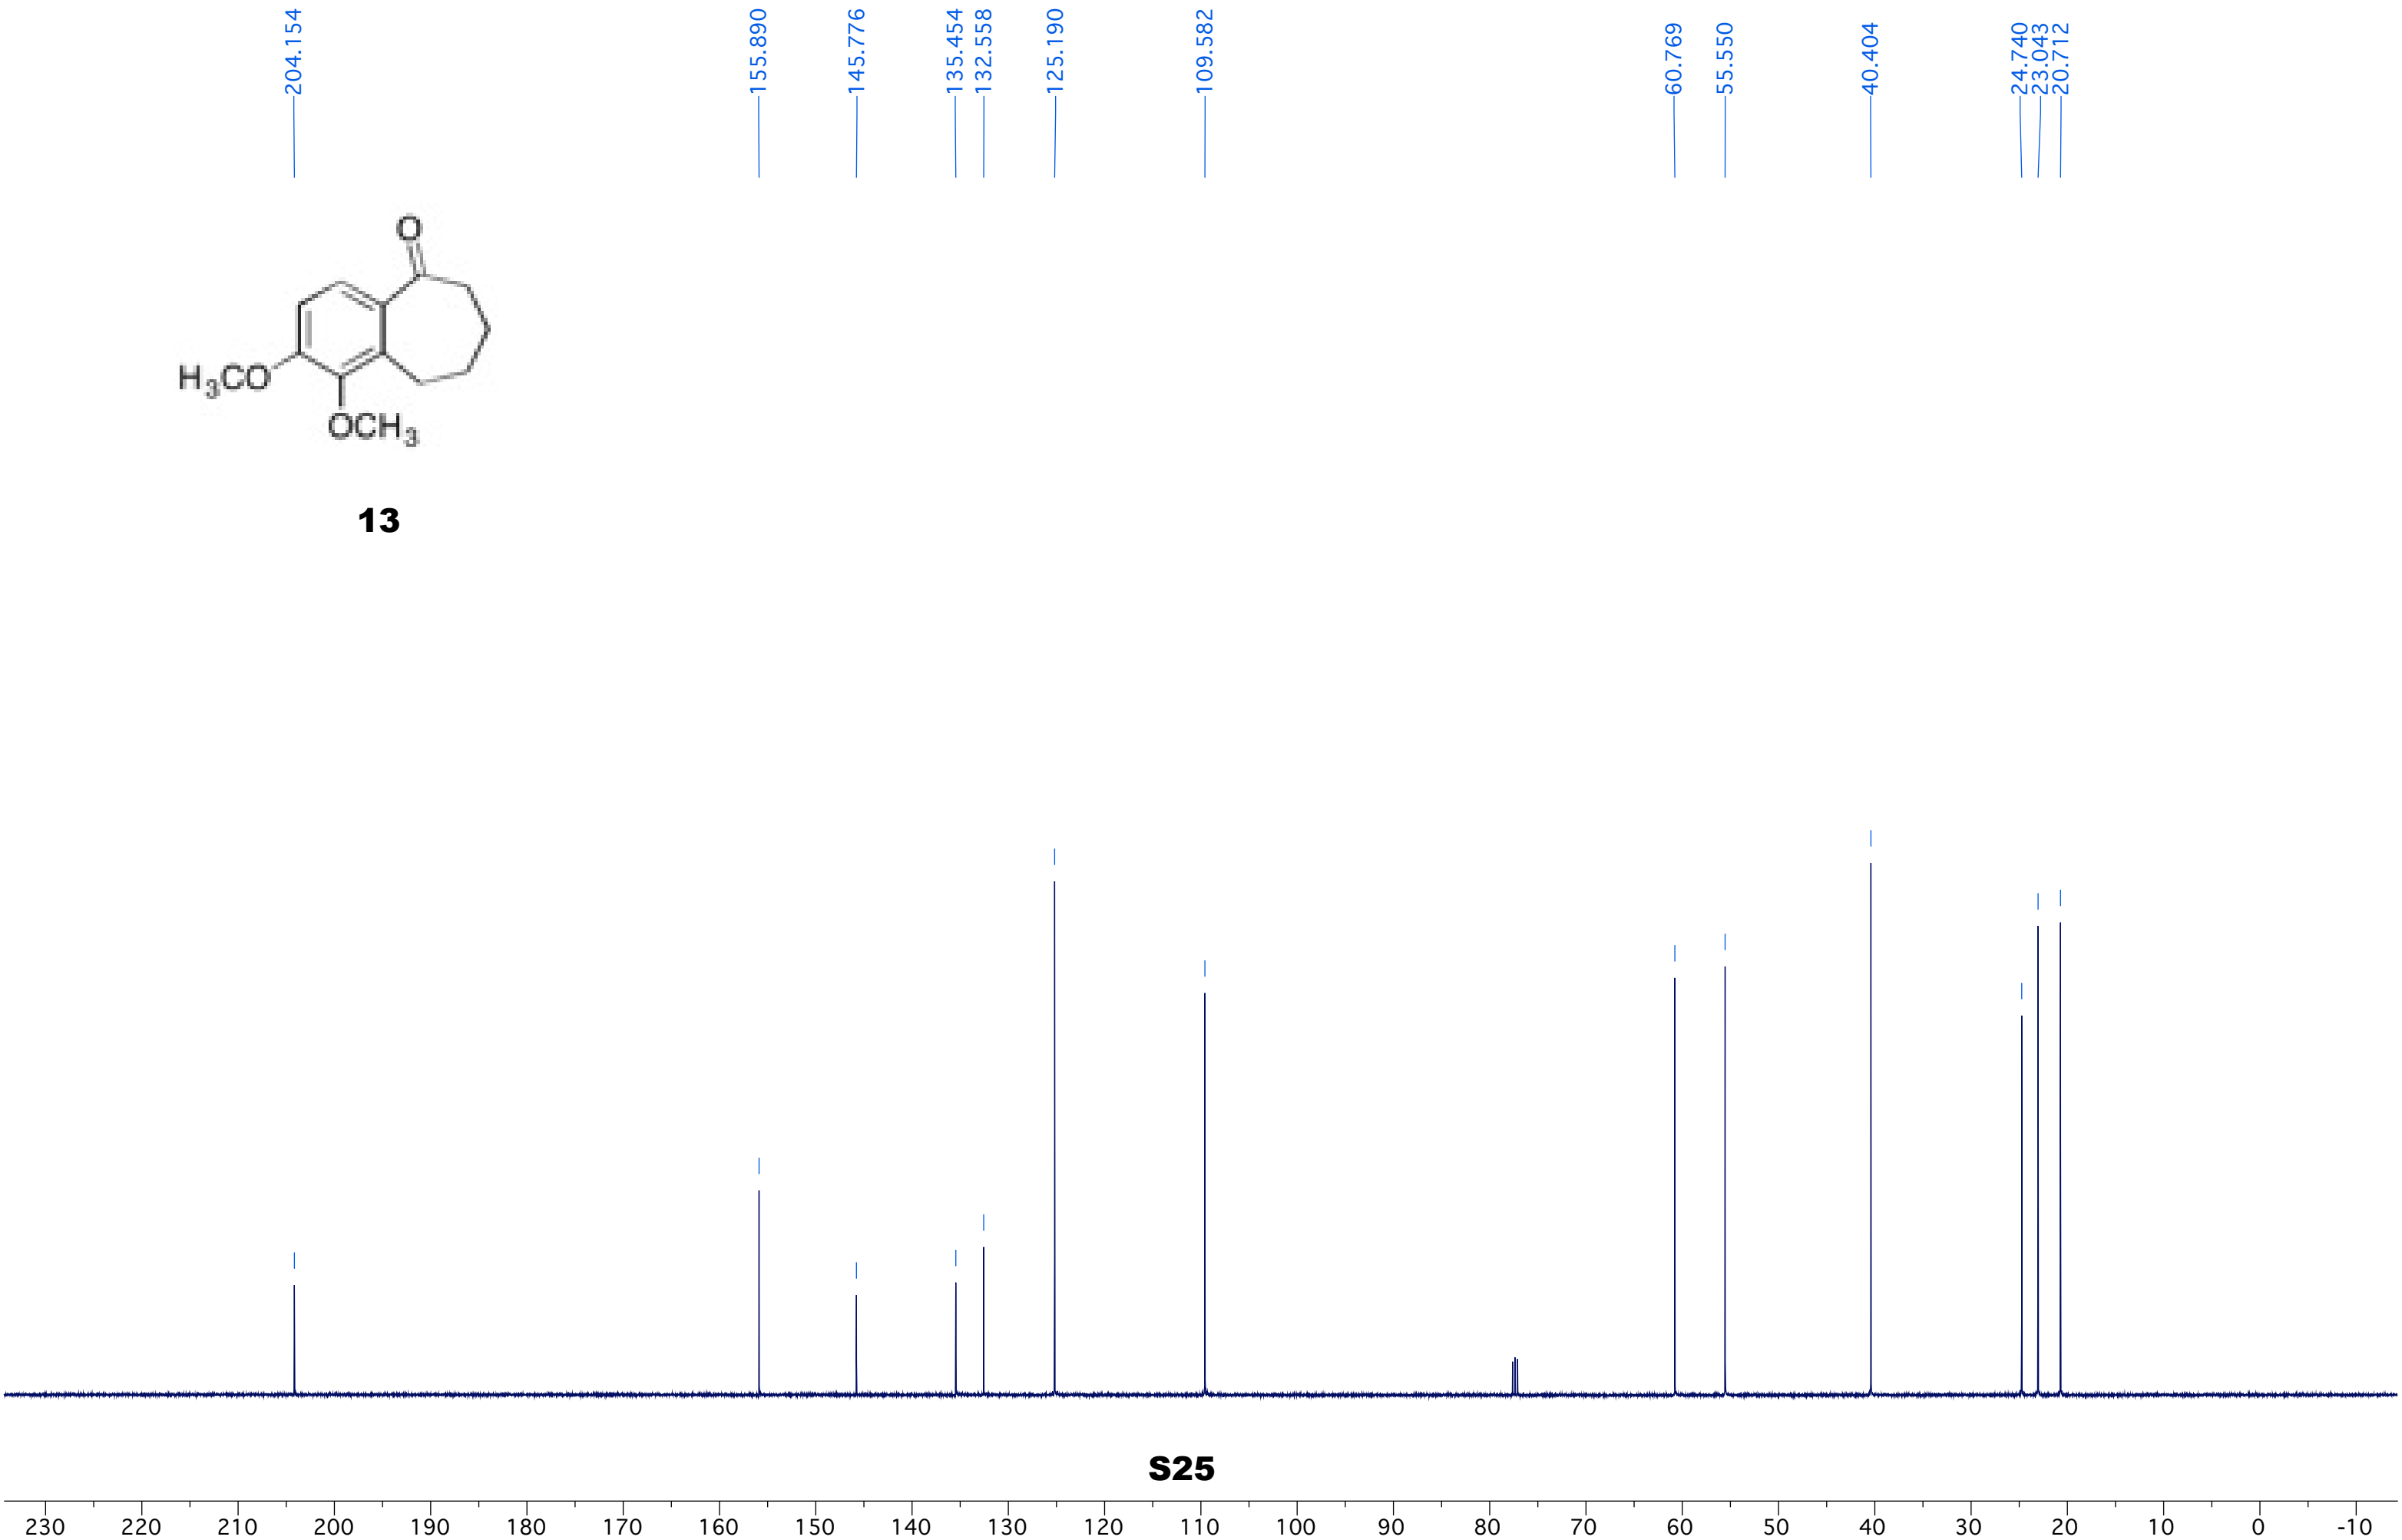

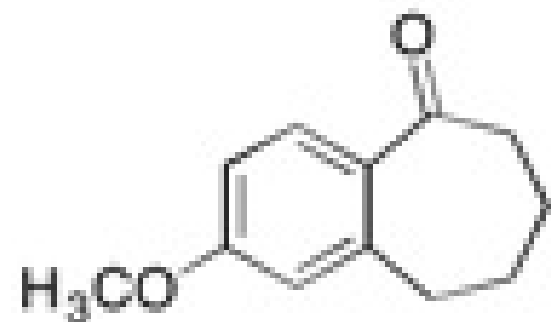

**14**

7.598  
7.581

6.620  
6.615  
6.603  
6.598  
6.517  
6.512

2.715  
2.703  
2.689  
2.520  
2.508  
2.496  
1.956  
1.840  
1.694  
1.693  
1.679  
1.669  
1.653  
1.641  
1.611  
1.600  
1.587  
1.574  
1.559

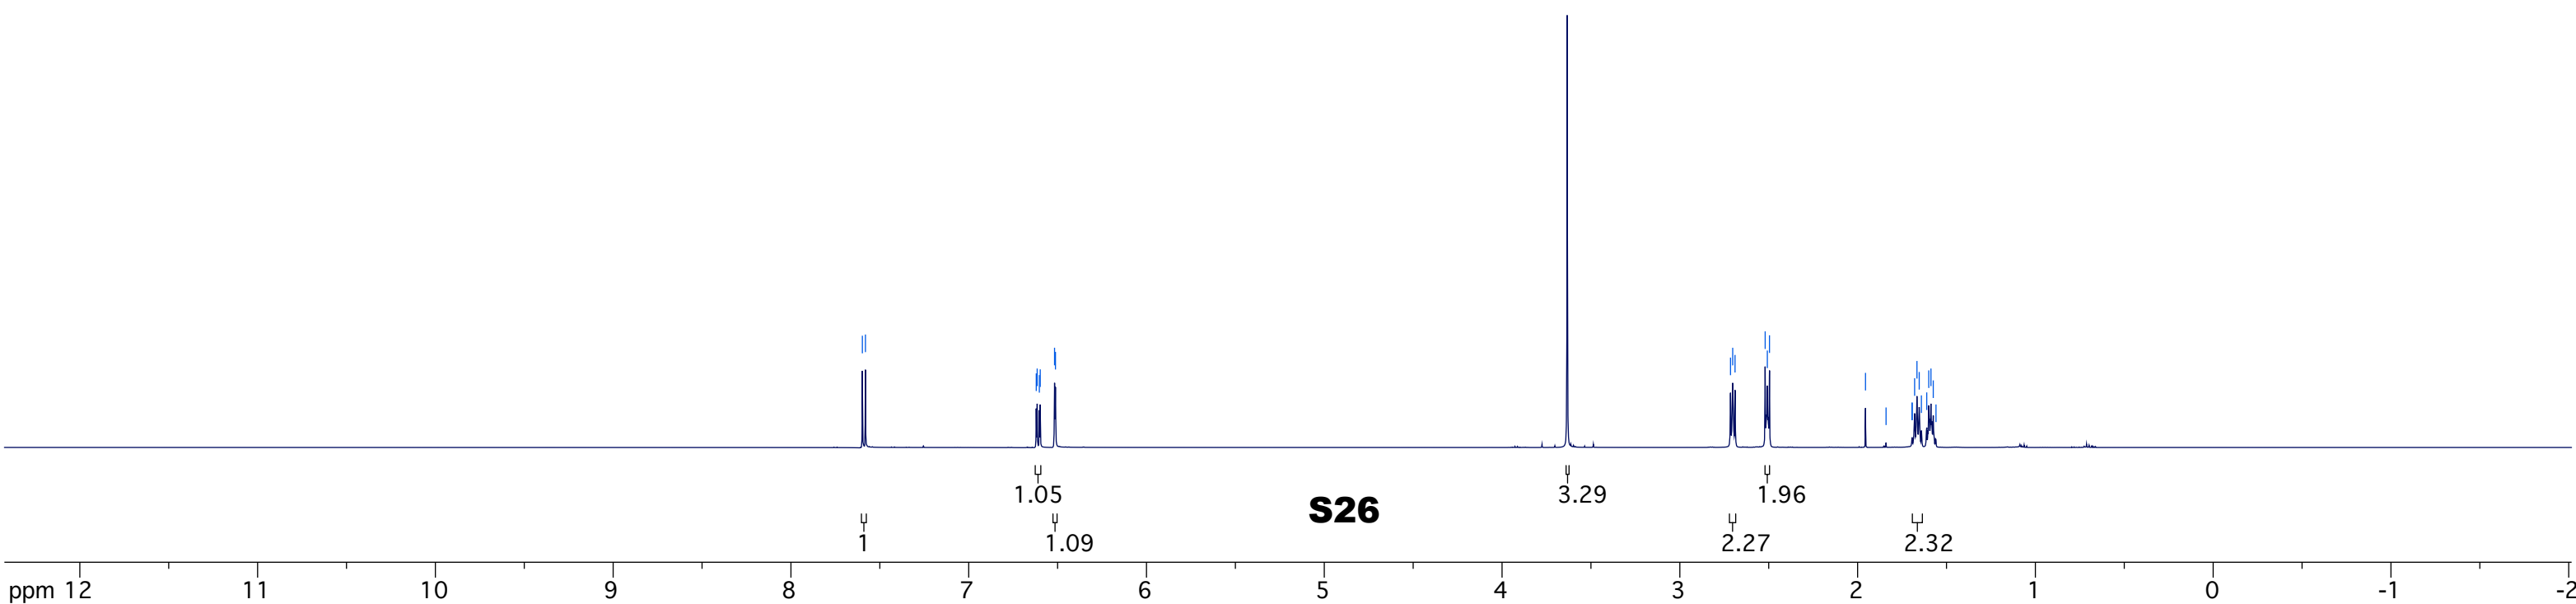

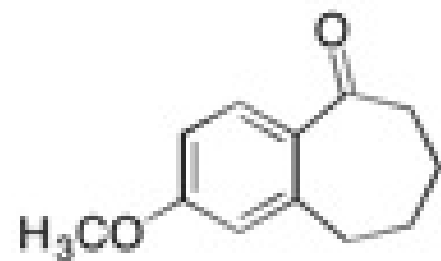

**14**

203.532  
162.545  
144.084  
131.288  
130.972  
114.703  
111.638  
55.087  
40.523  
32.627  
24.922  
20.539

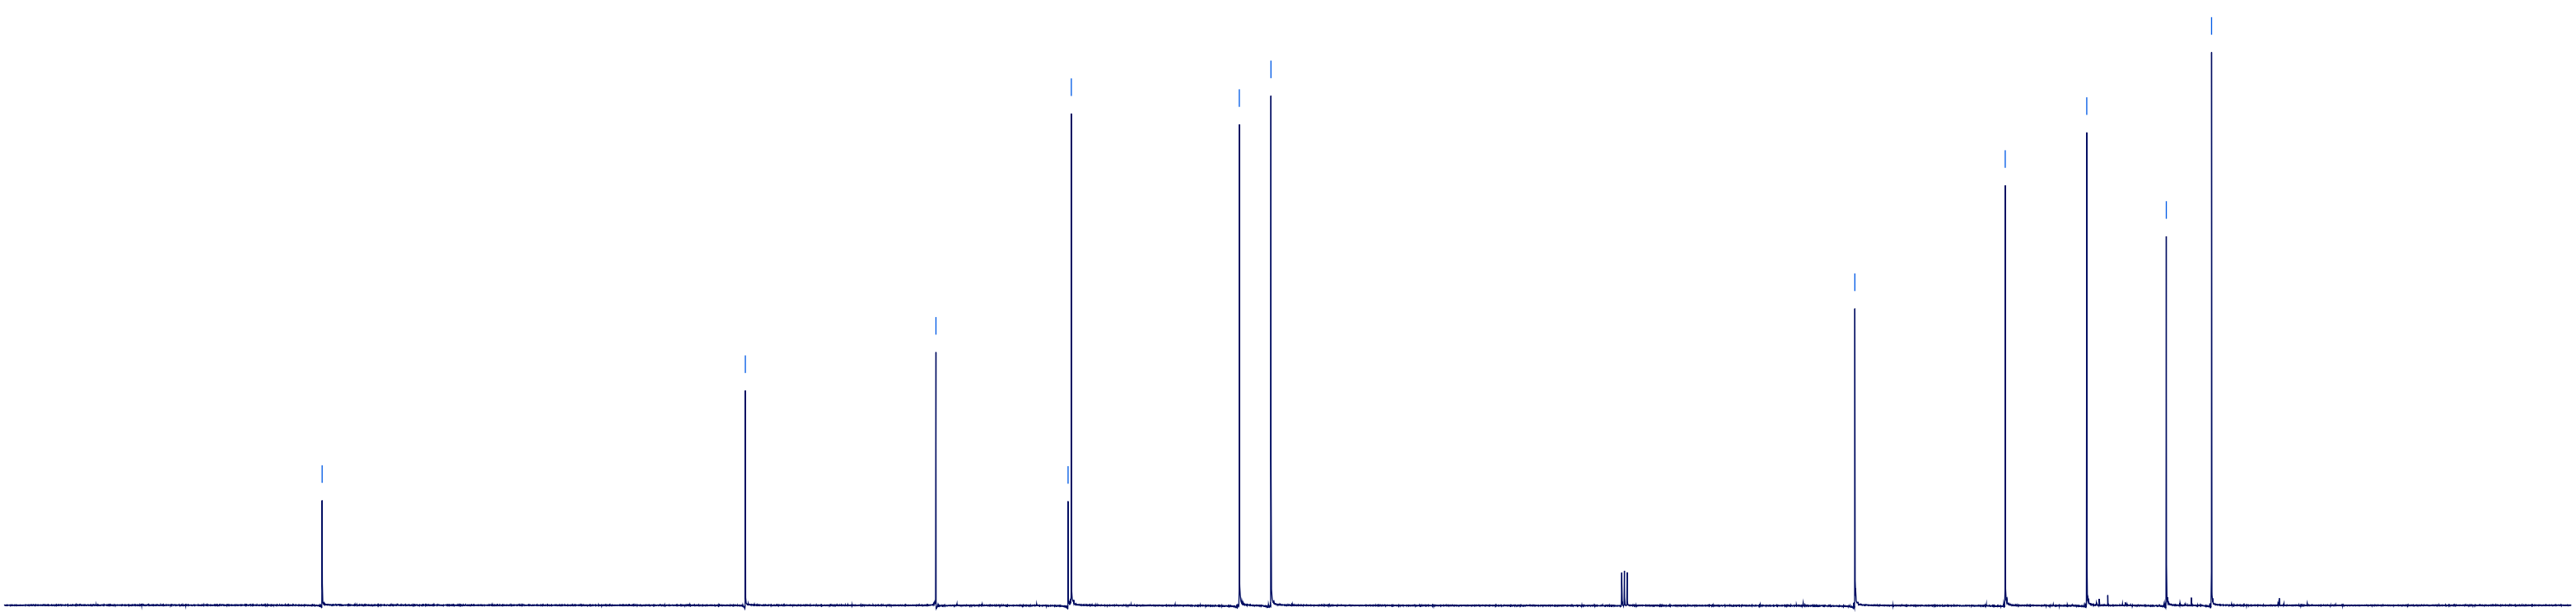

**S27**

230 220 210 200 190 180 170 160 150 140 130 120 110 100 90 80 70 60 50 40 30 20 10 0 -10

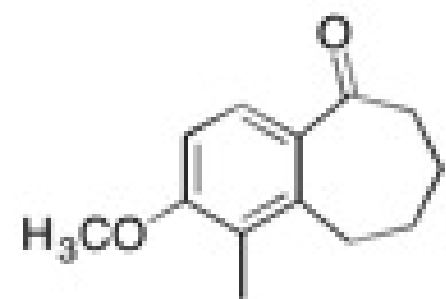

**15**

7.430  
7.413

6.648  
6.631

3.719

2.771  
2.759  
2.745  
2.541  
2.529  
2.517  
2.094  
1.714  
1.699  
1.686  
1.673  
1.661  
1.632  
1.620  
1.609  
1.596  
1.583

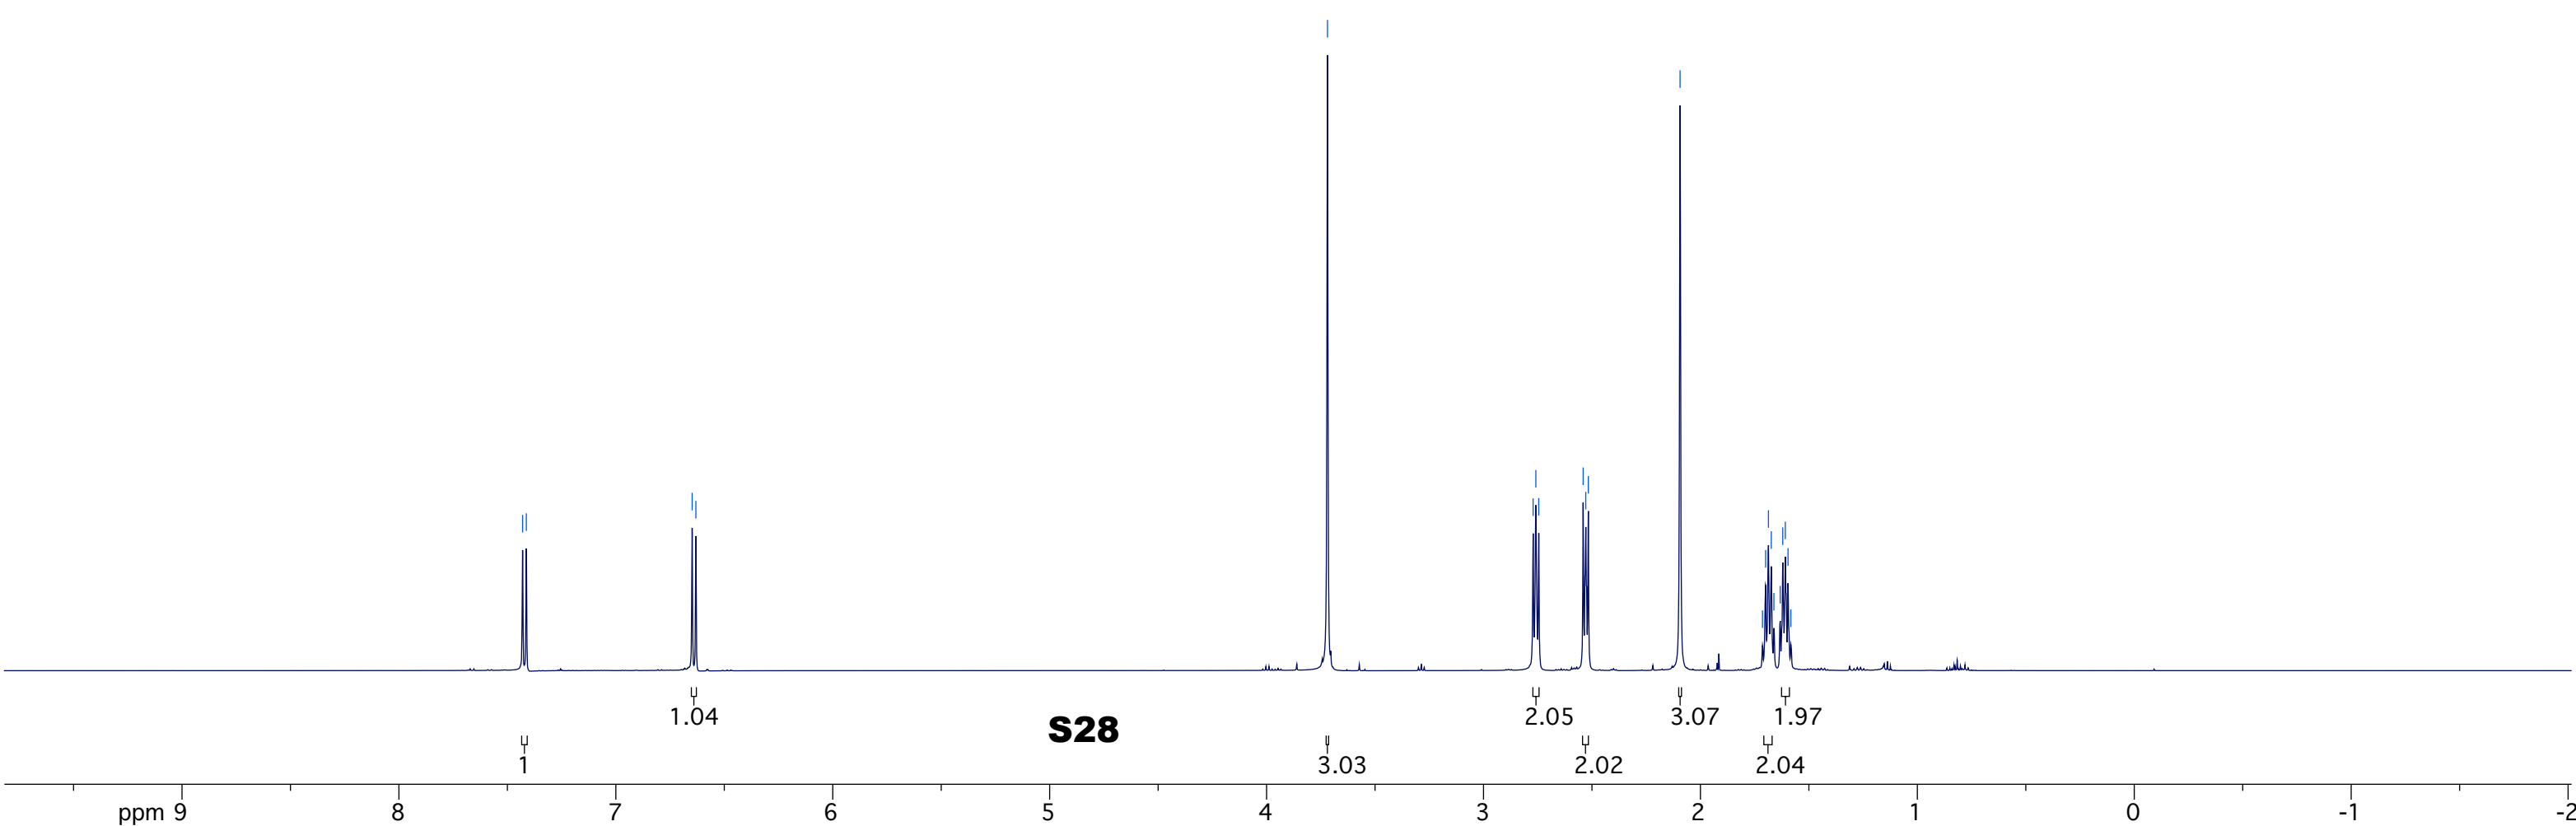

**S28**

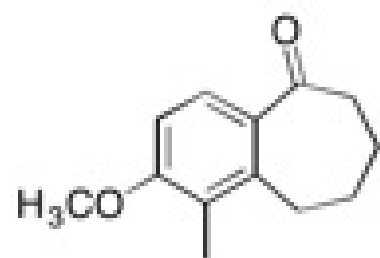

**15**

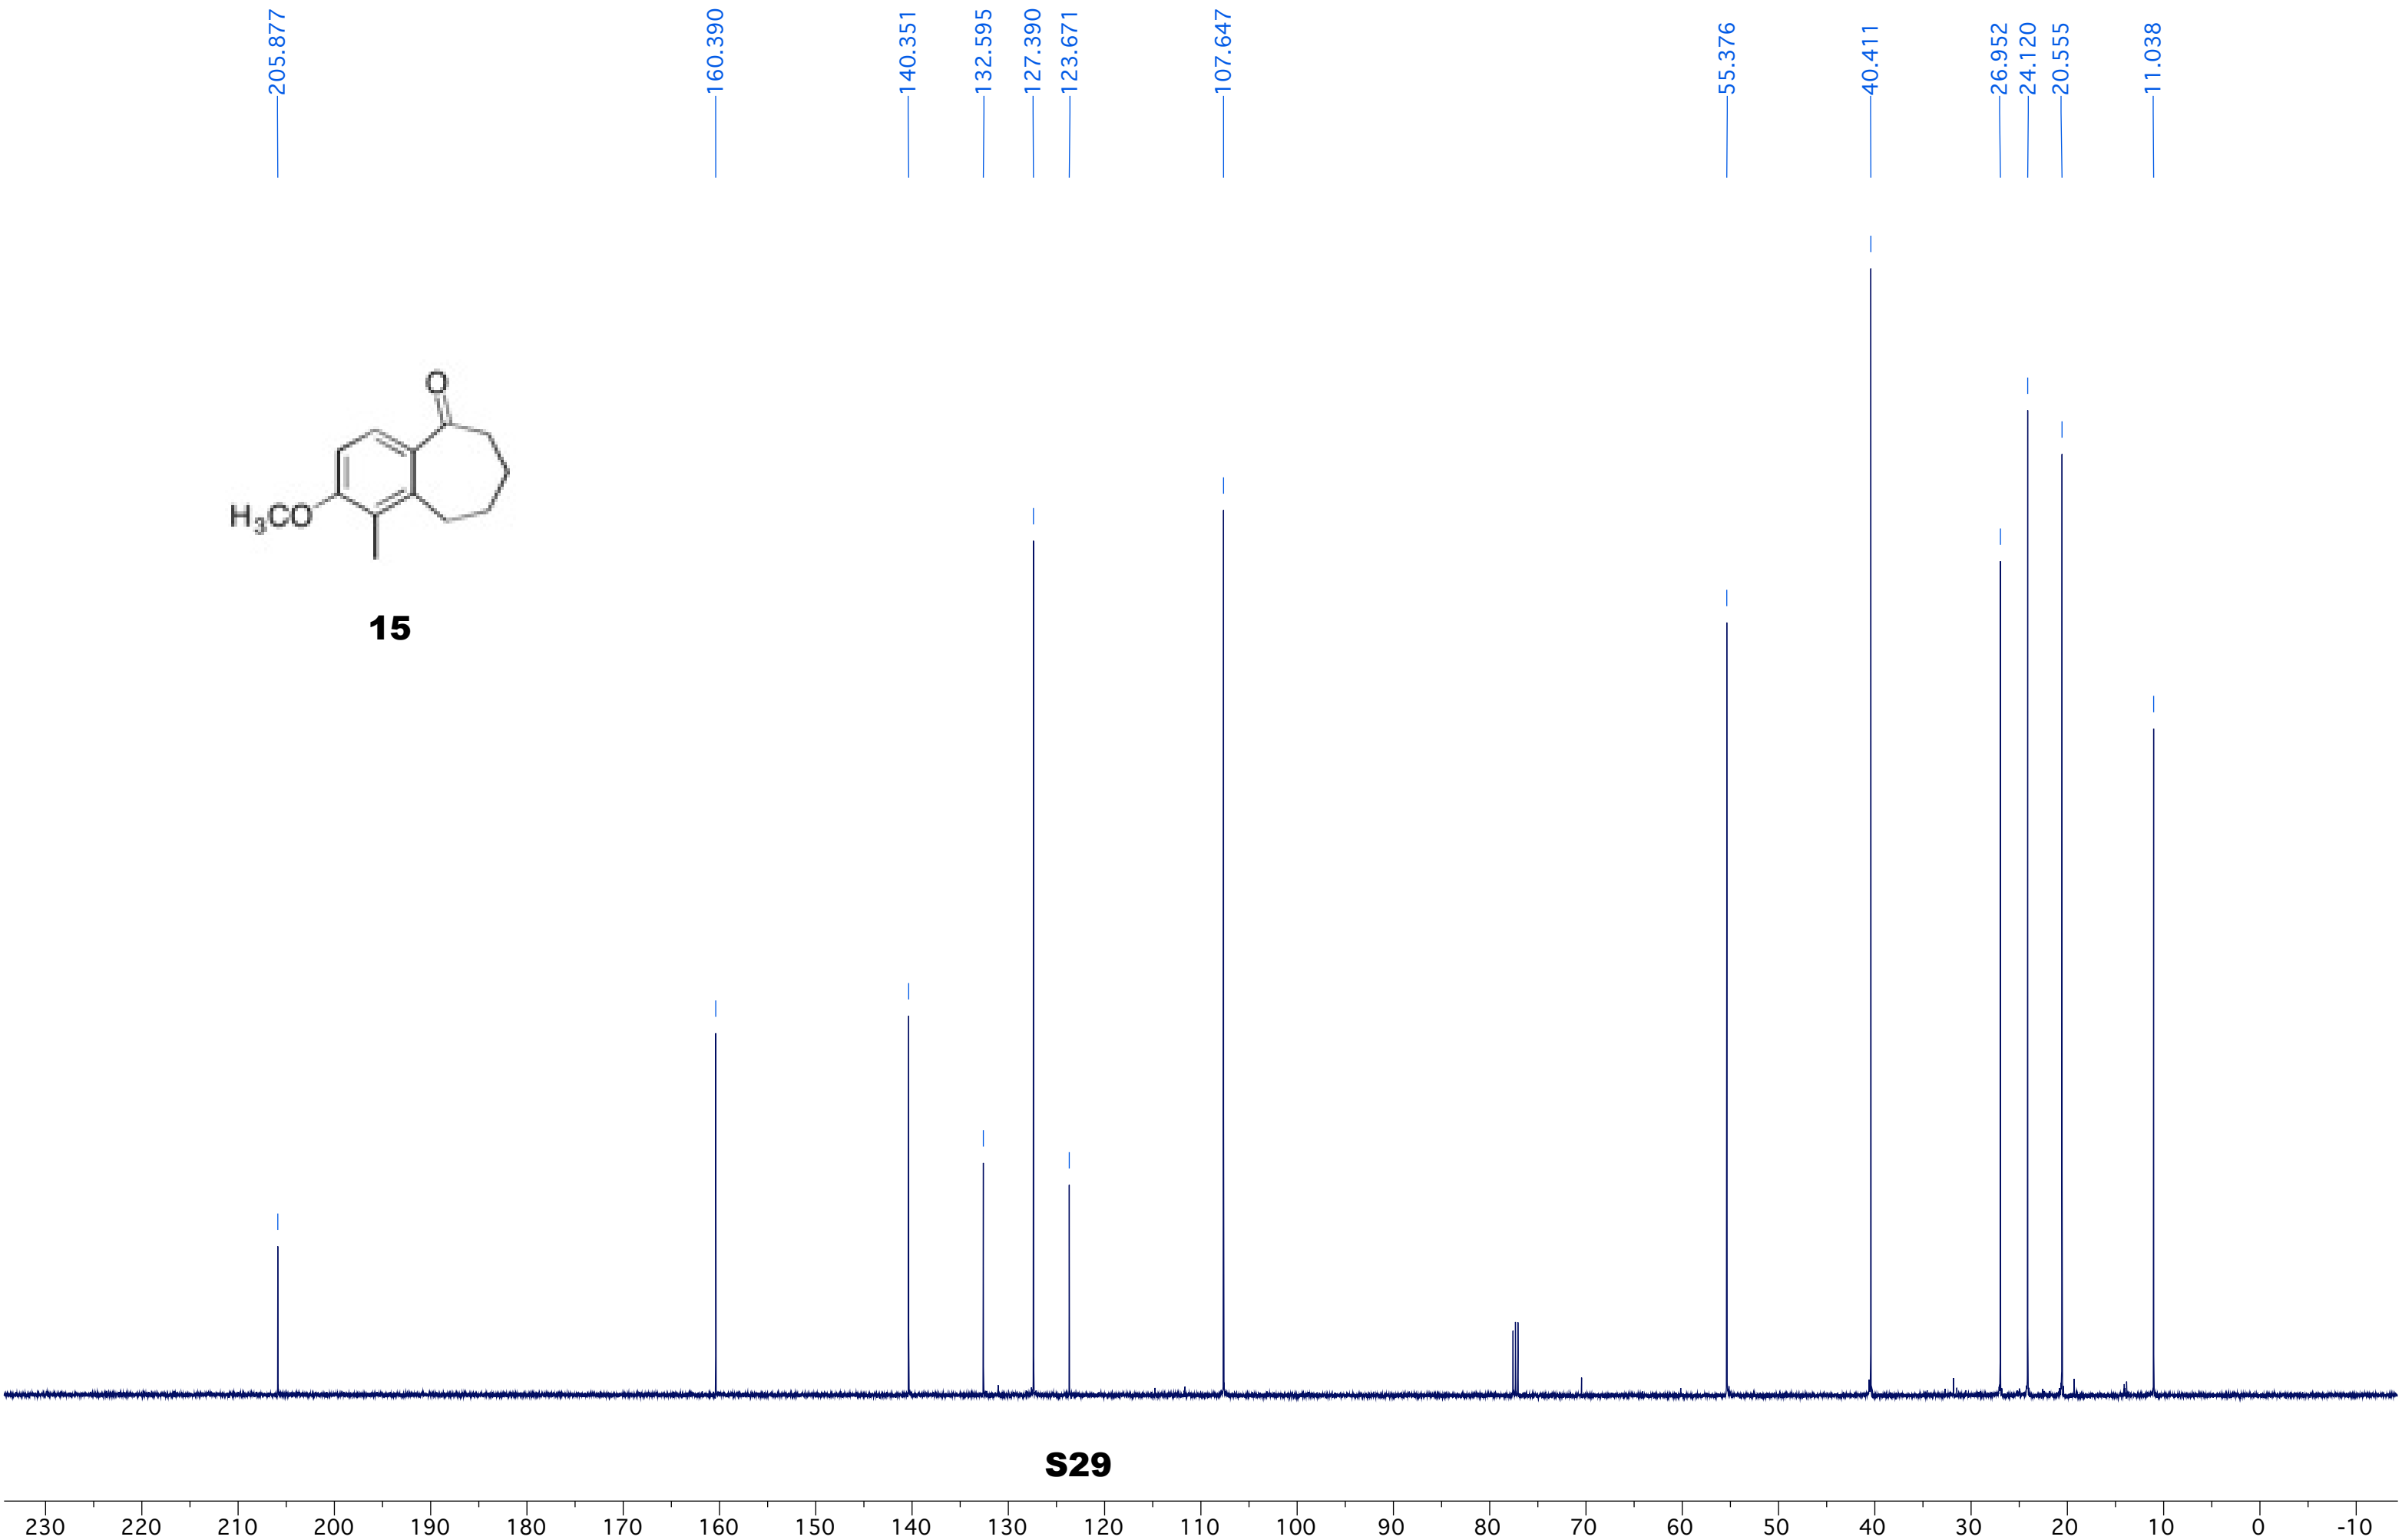

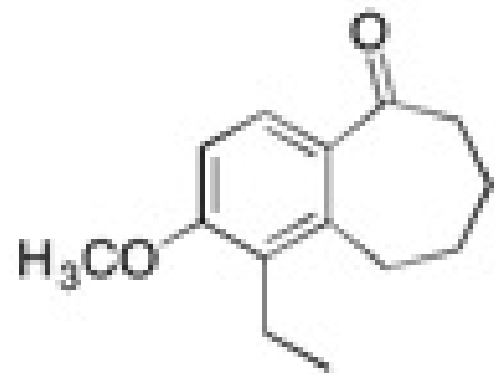

**16**

7.474  
7.457

6.709  
6.692

3.768

2.829  
2.817  
2.803  
2.679  
2.664  
2.649  
2.634  
2.583  
2.571  
2.559  
1.778  
1.764  
1.751  
1.738  
1.725  
1.680  
1.672  
1.667  
1.655  
1.652  
1.643  
1.629  
1.048  
1.033  
1.018

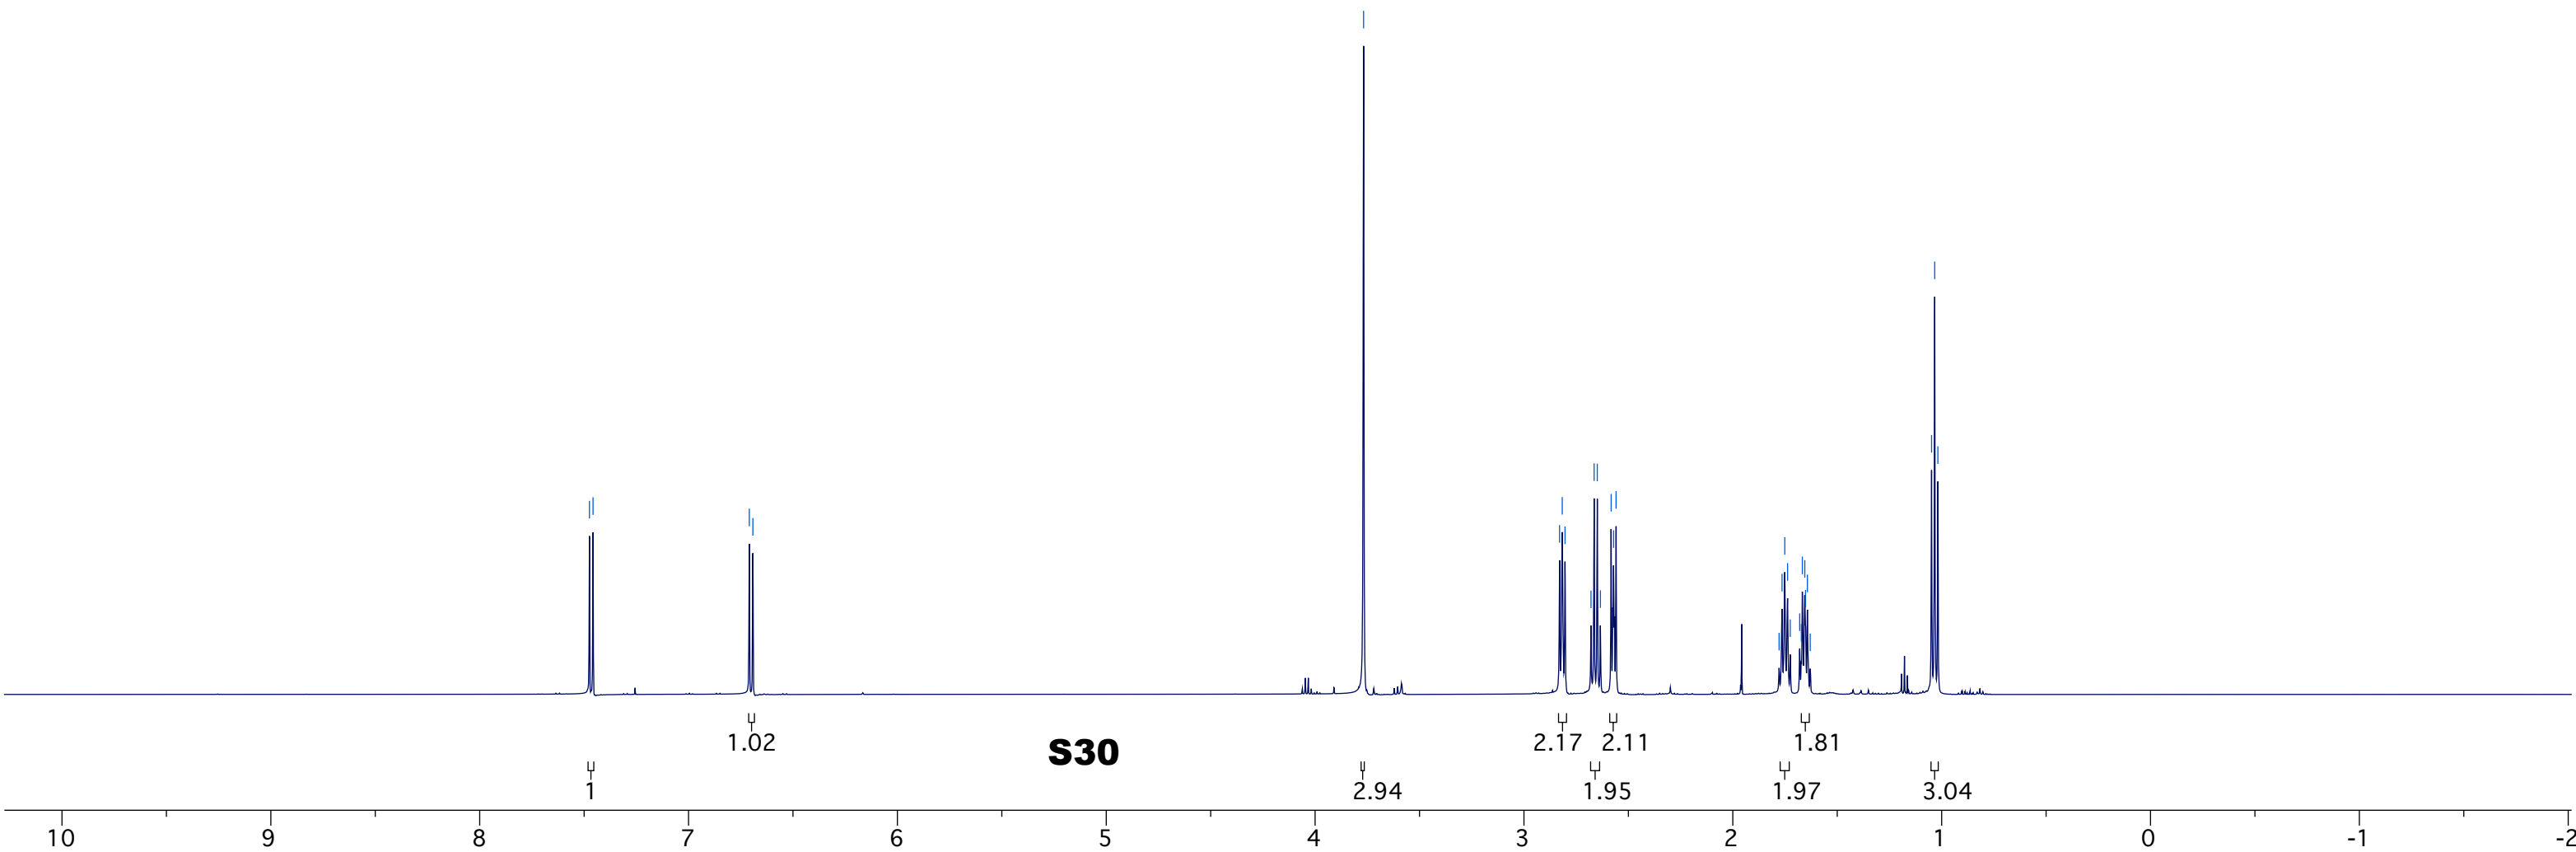

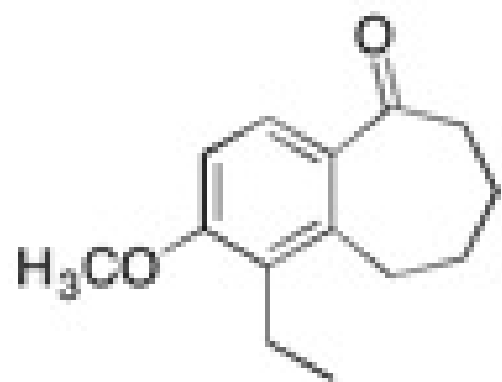

**16**

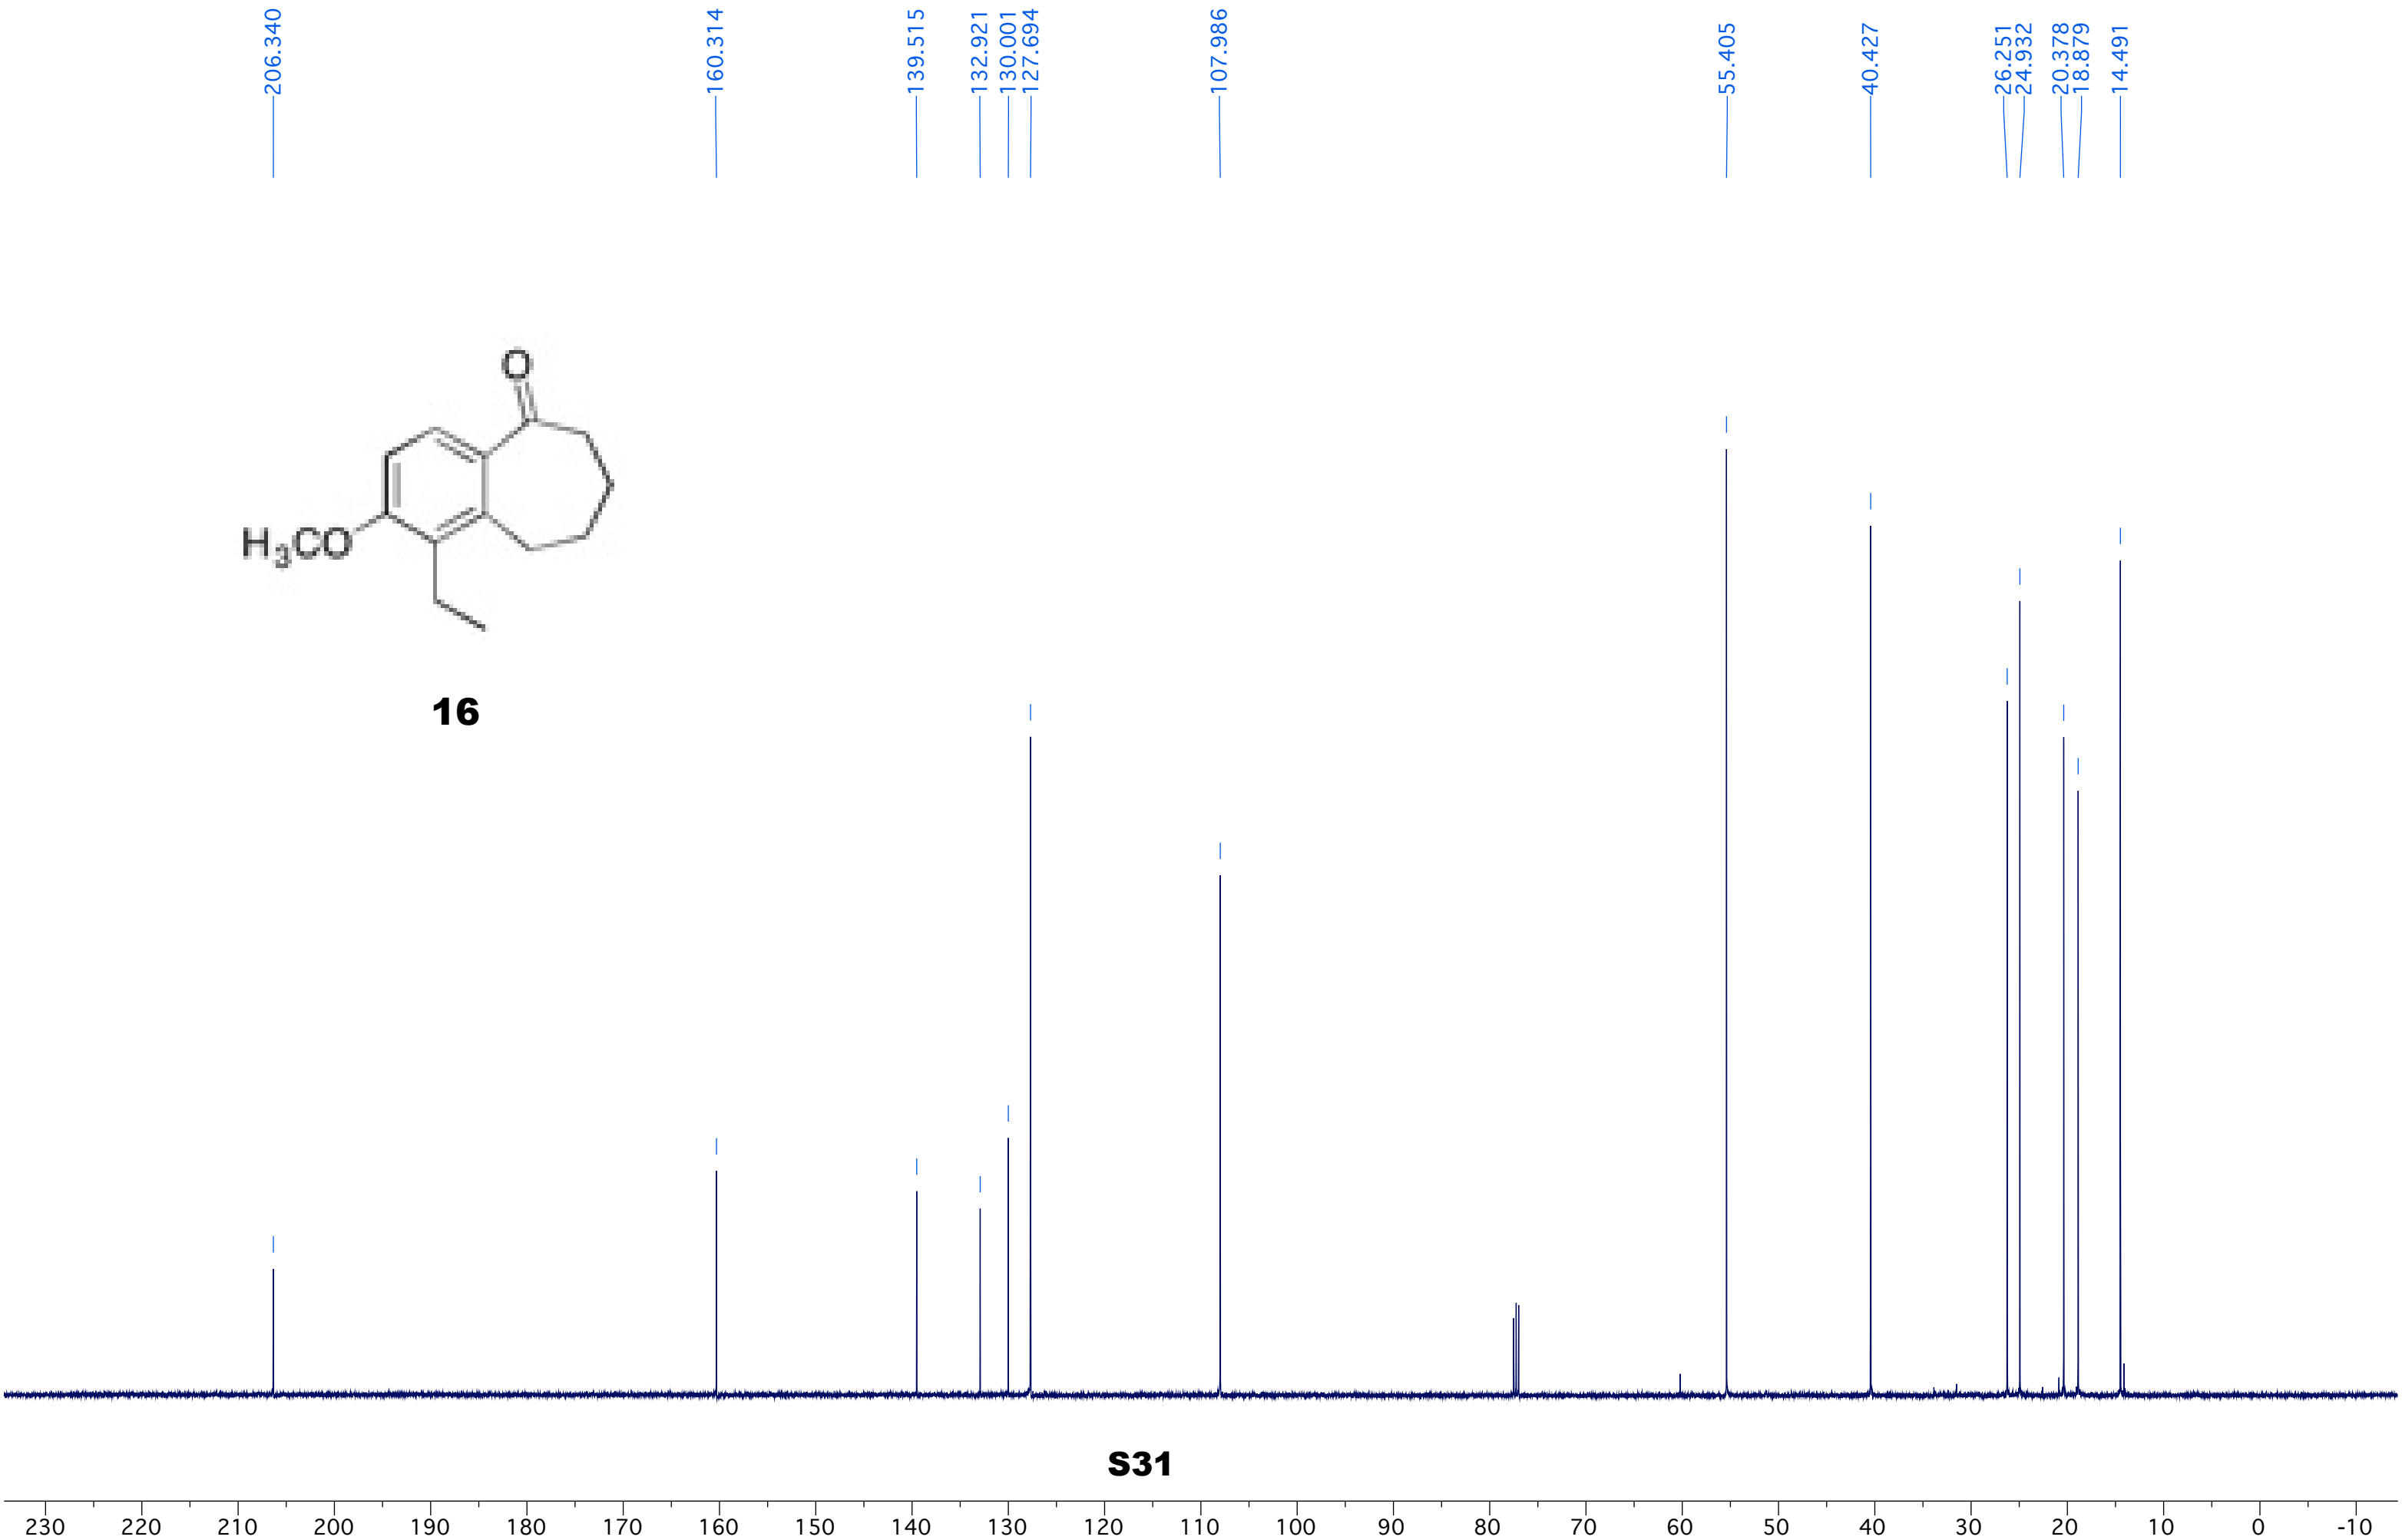

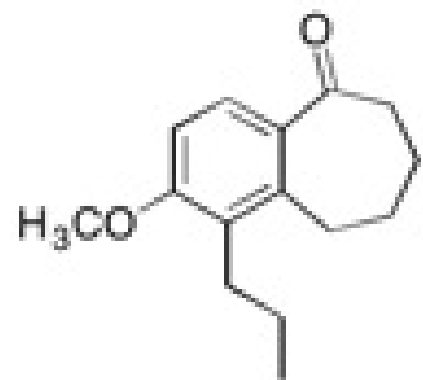

**17**

7.469  
7.452

6.699  
6.682

3.751

2.821  
2.808  
2.795  
2.618  
2.606  
2.602  
2.597  
2.586  
2.575  
2.567  
2.563  
2.559  
2.551  
1.768  
1.754  
1.741  
1.728  
1.715  
1.670  
1.658  
1.647  
1.634  
1.621  
1.465  
1.450  
1.435  
1.419  
1.404  
1.389  
0.929  
0.914  
0.899

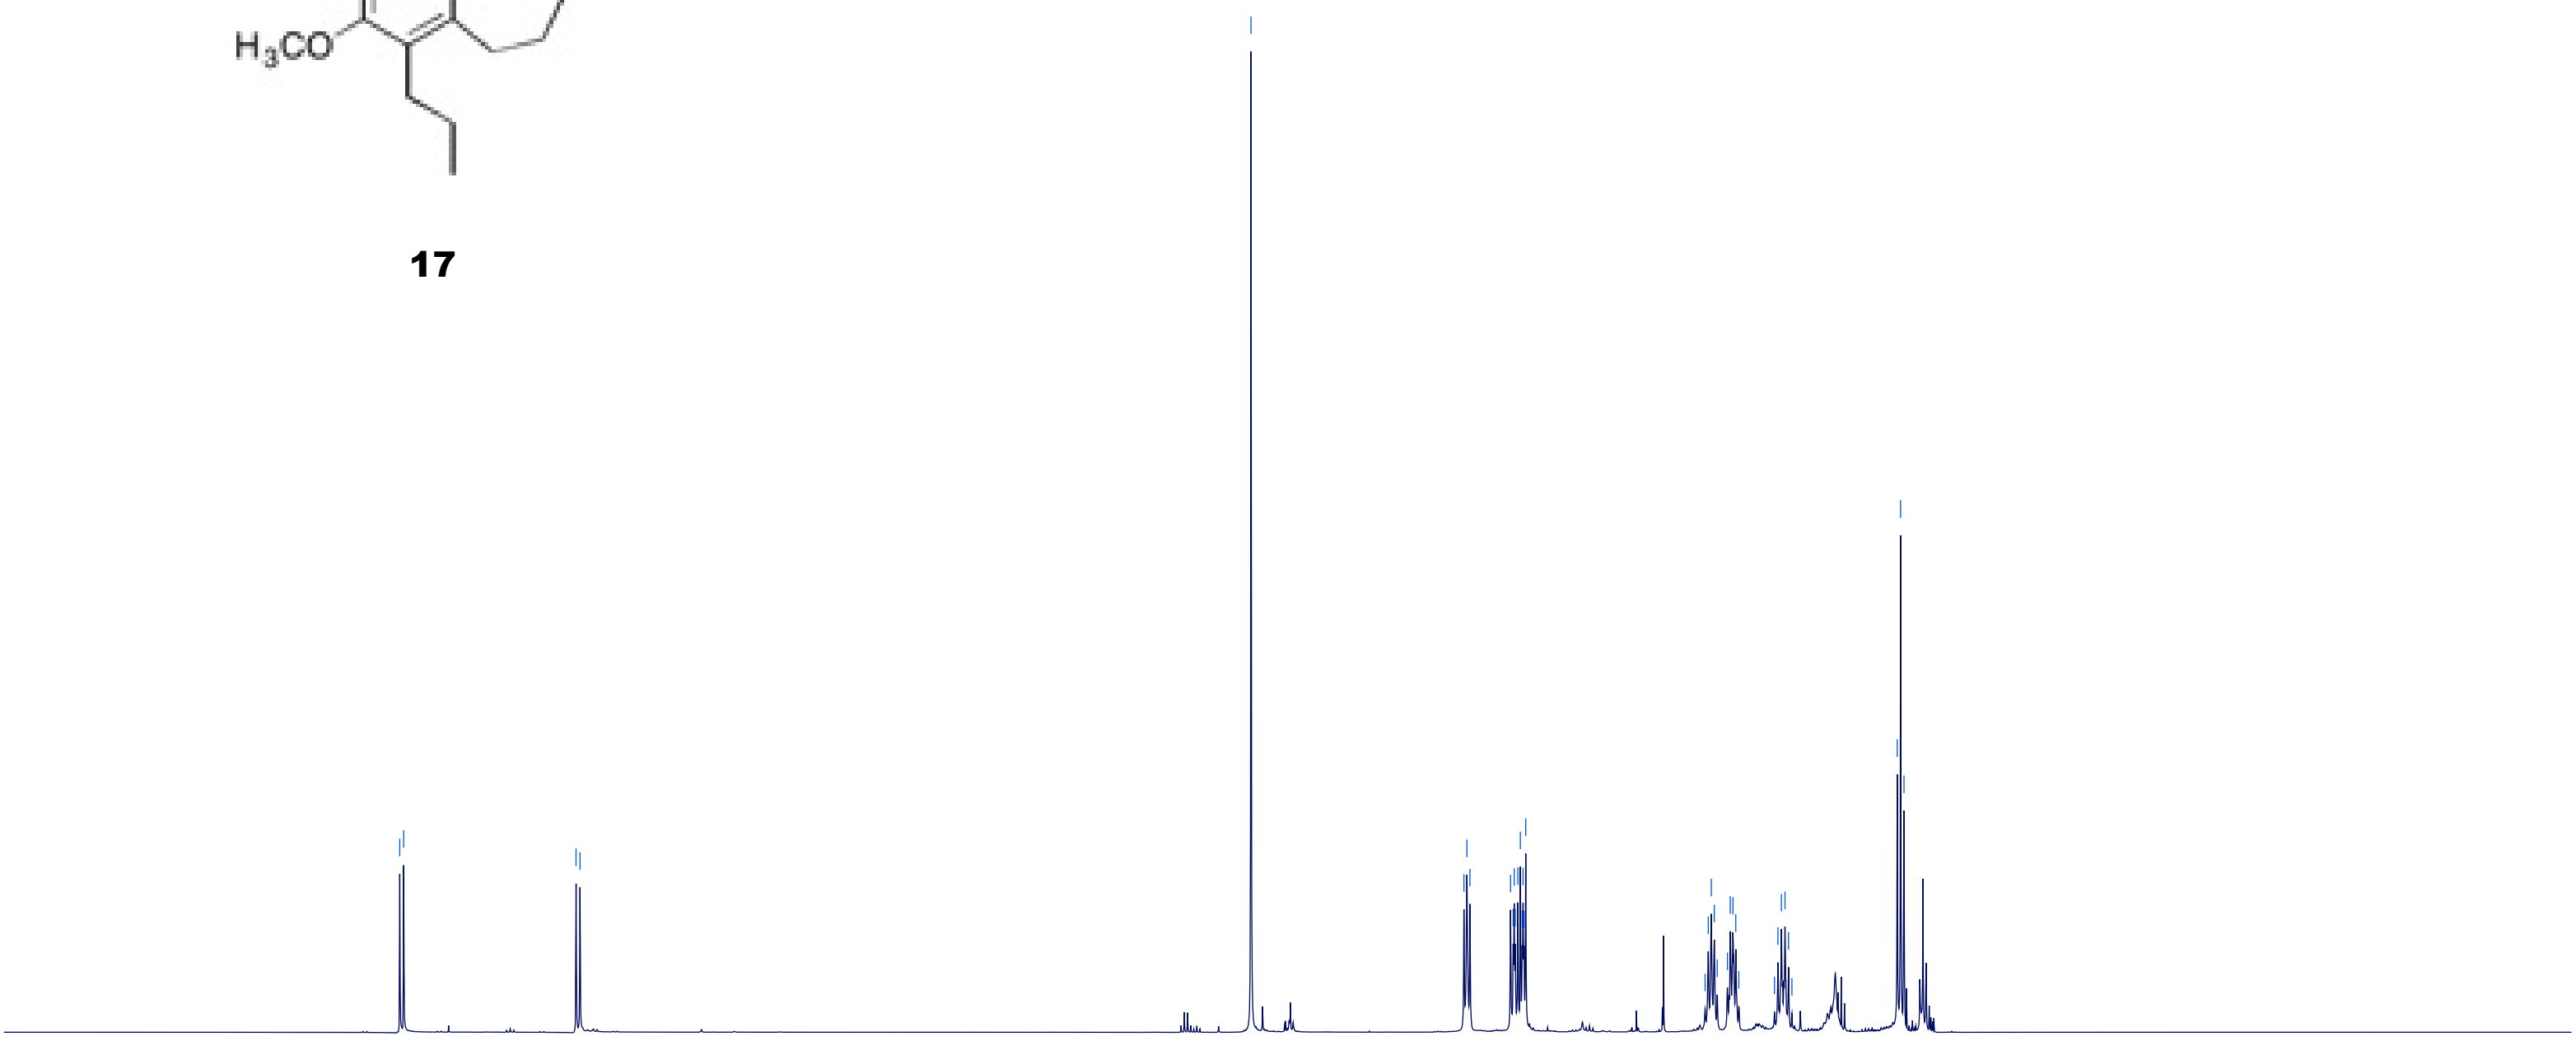

1

1.05

**S32**

3.13

2.03

3.95

2.15

2.18

1.96

2.87

9

8

7

6

5

4

3

2

1

0

-1

-2



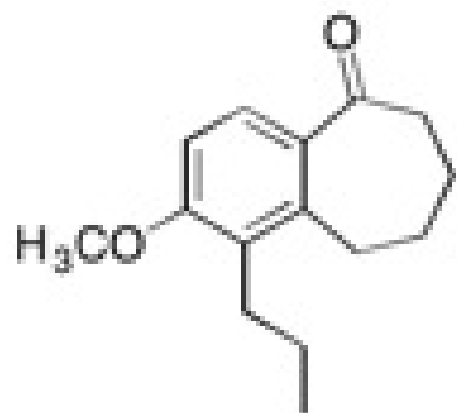

**17**

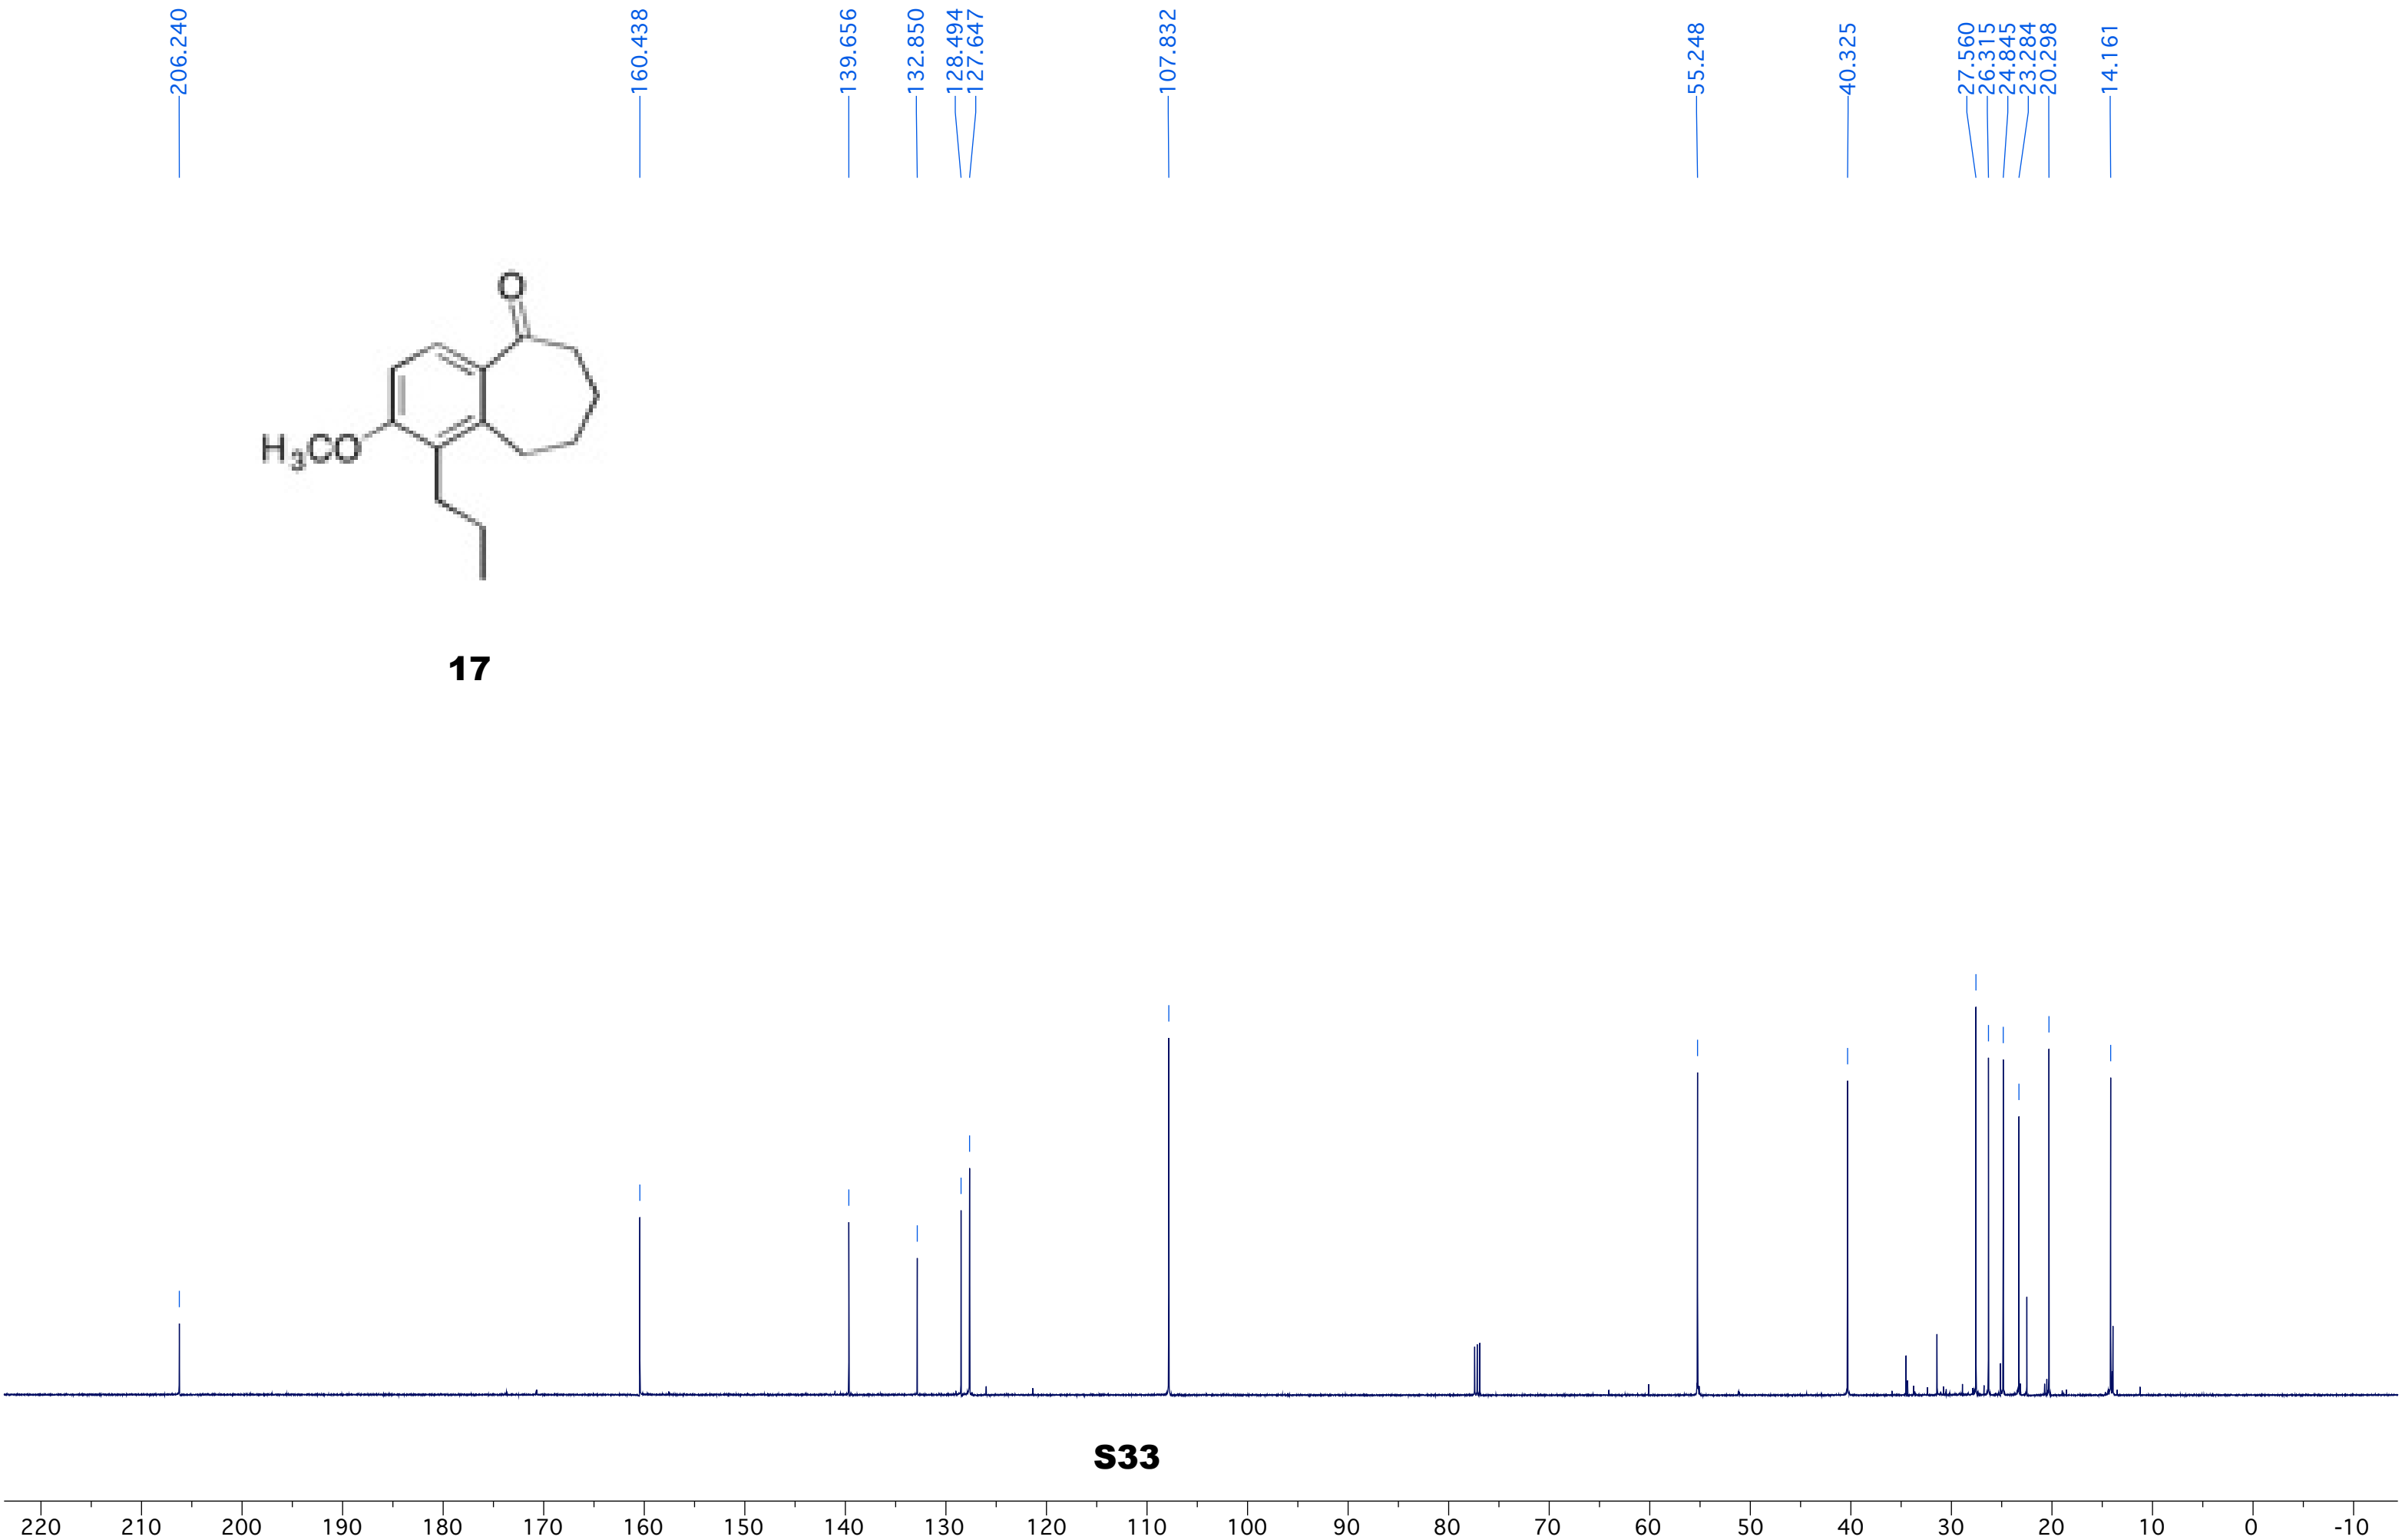

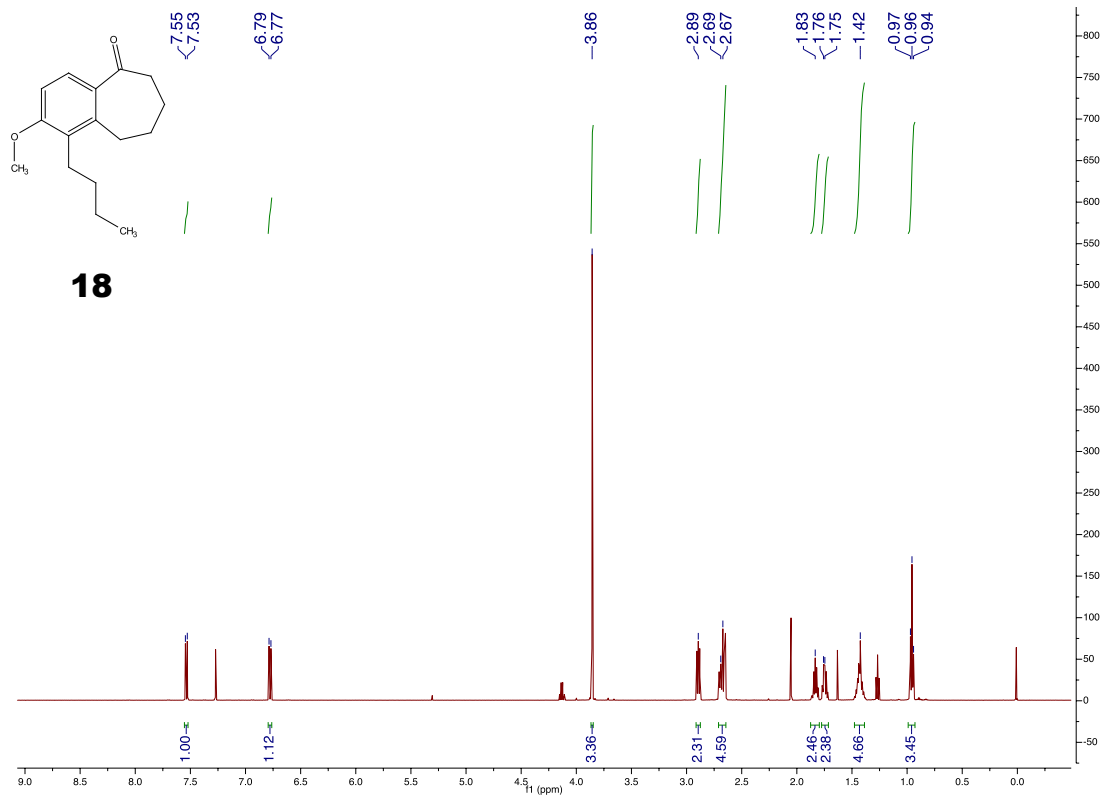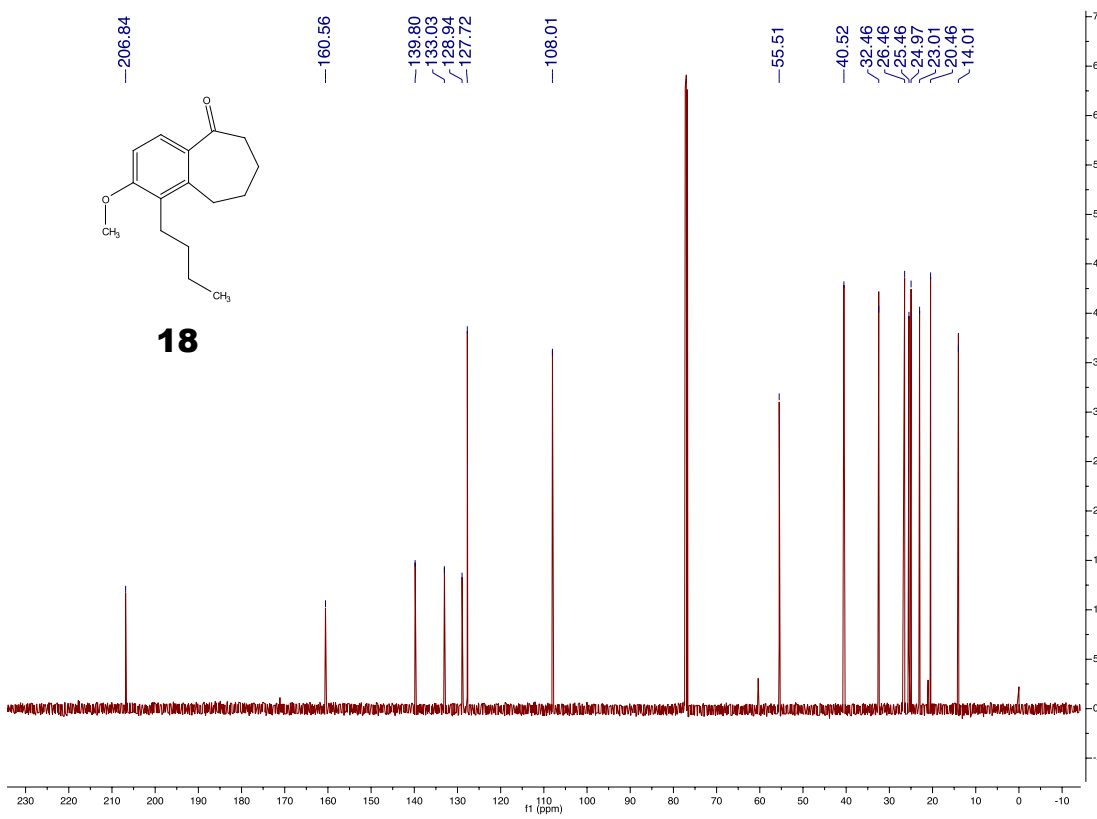

# 1-butyl-2-methoxy-5-(3', 4', 5'- trimethoxyphenyl)-benzuber-5-ol

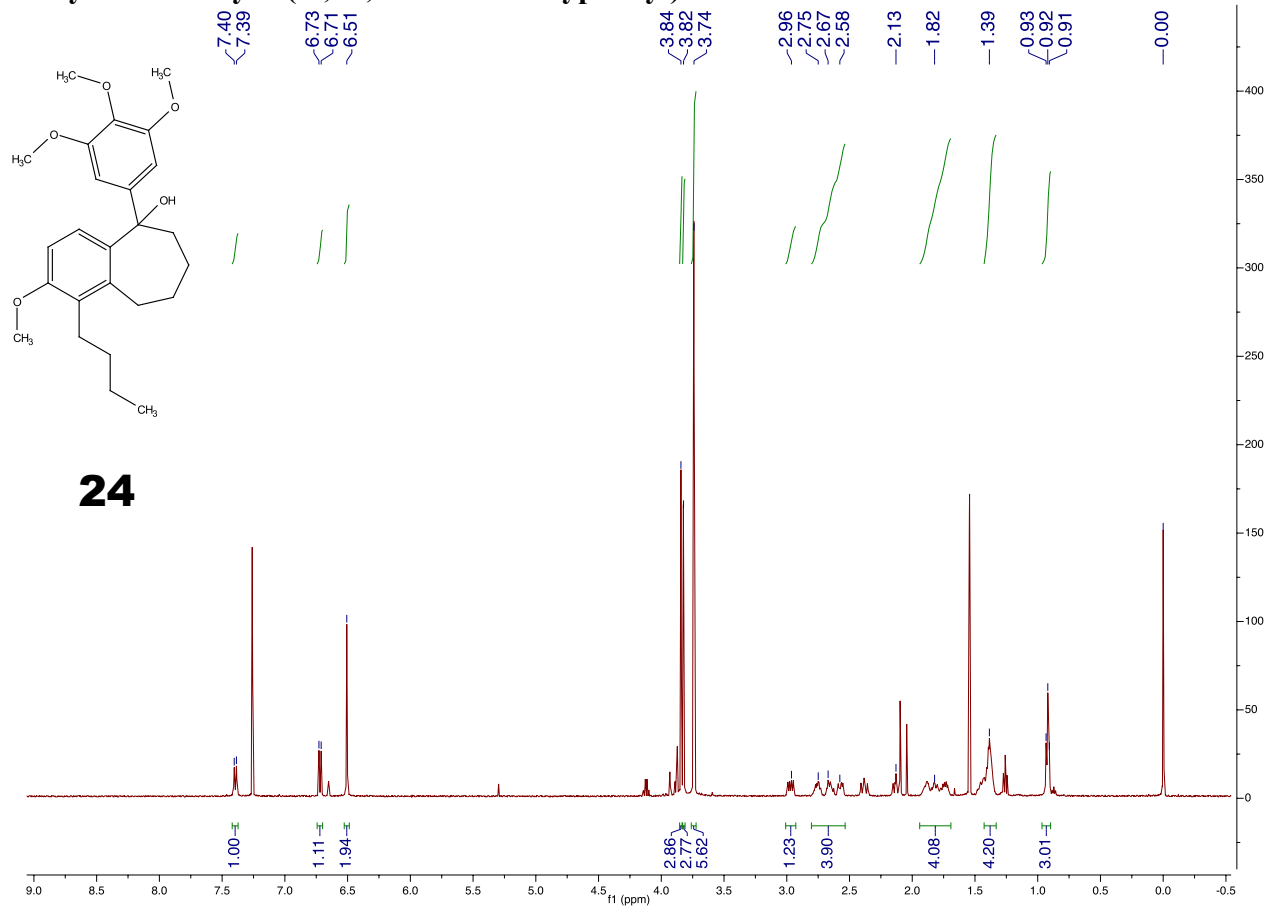

7.70  
7.67

6.93  
6.91  
6.64  
6.63

3.76  
3.67  
3.19  
3.18  
3.17  
3.17  
3.16  
3.16  
3.14  
3.14  
2.50  
2.48  
2.47  
2.46  
2.45  
2.44  
2.09  
2.07  
2.07  
2.06  
2.06  
2.04  
2.04  
1.94  
1.87  
1.69  
1.69  
1.67  
1.66  
1.65  
1.56  
1.55  
1.55  
1.54  
1.54  
1.53  
1.53  
0.00

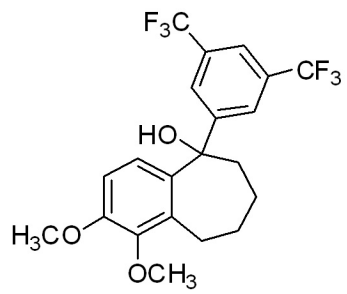

**25**

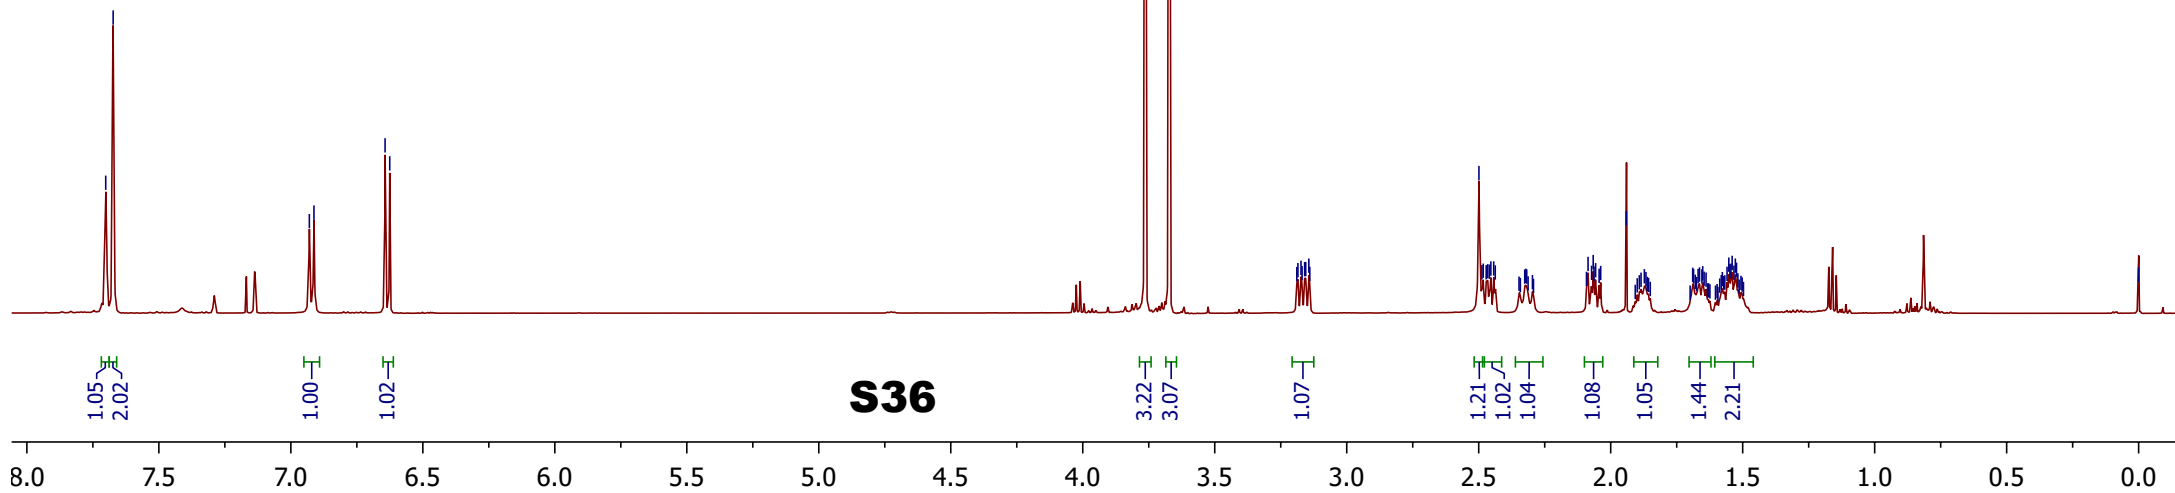

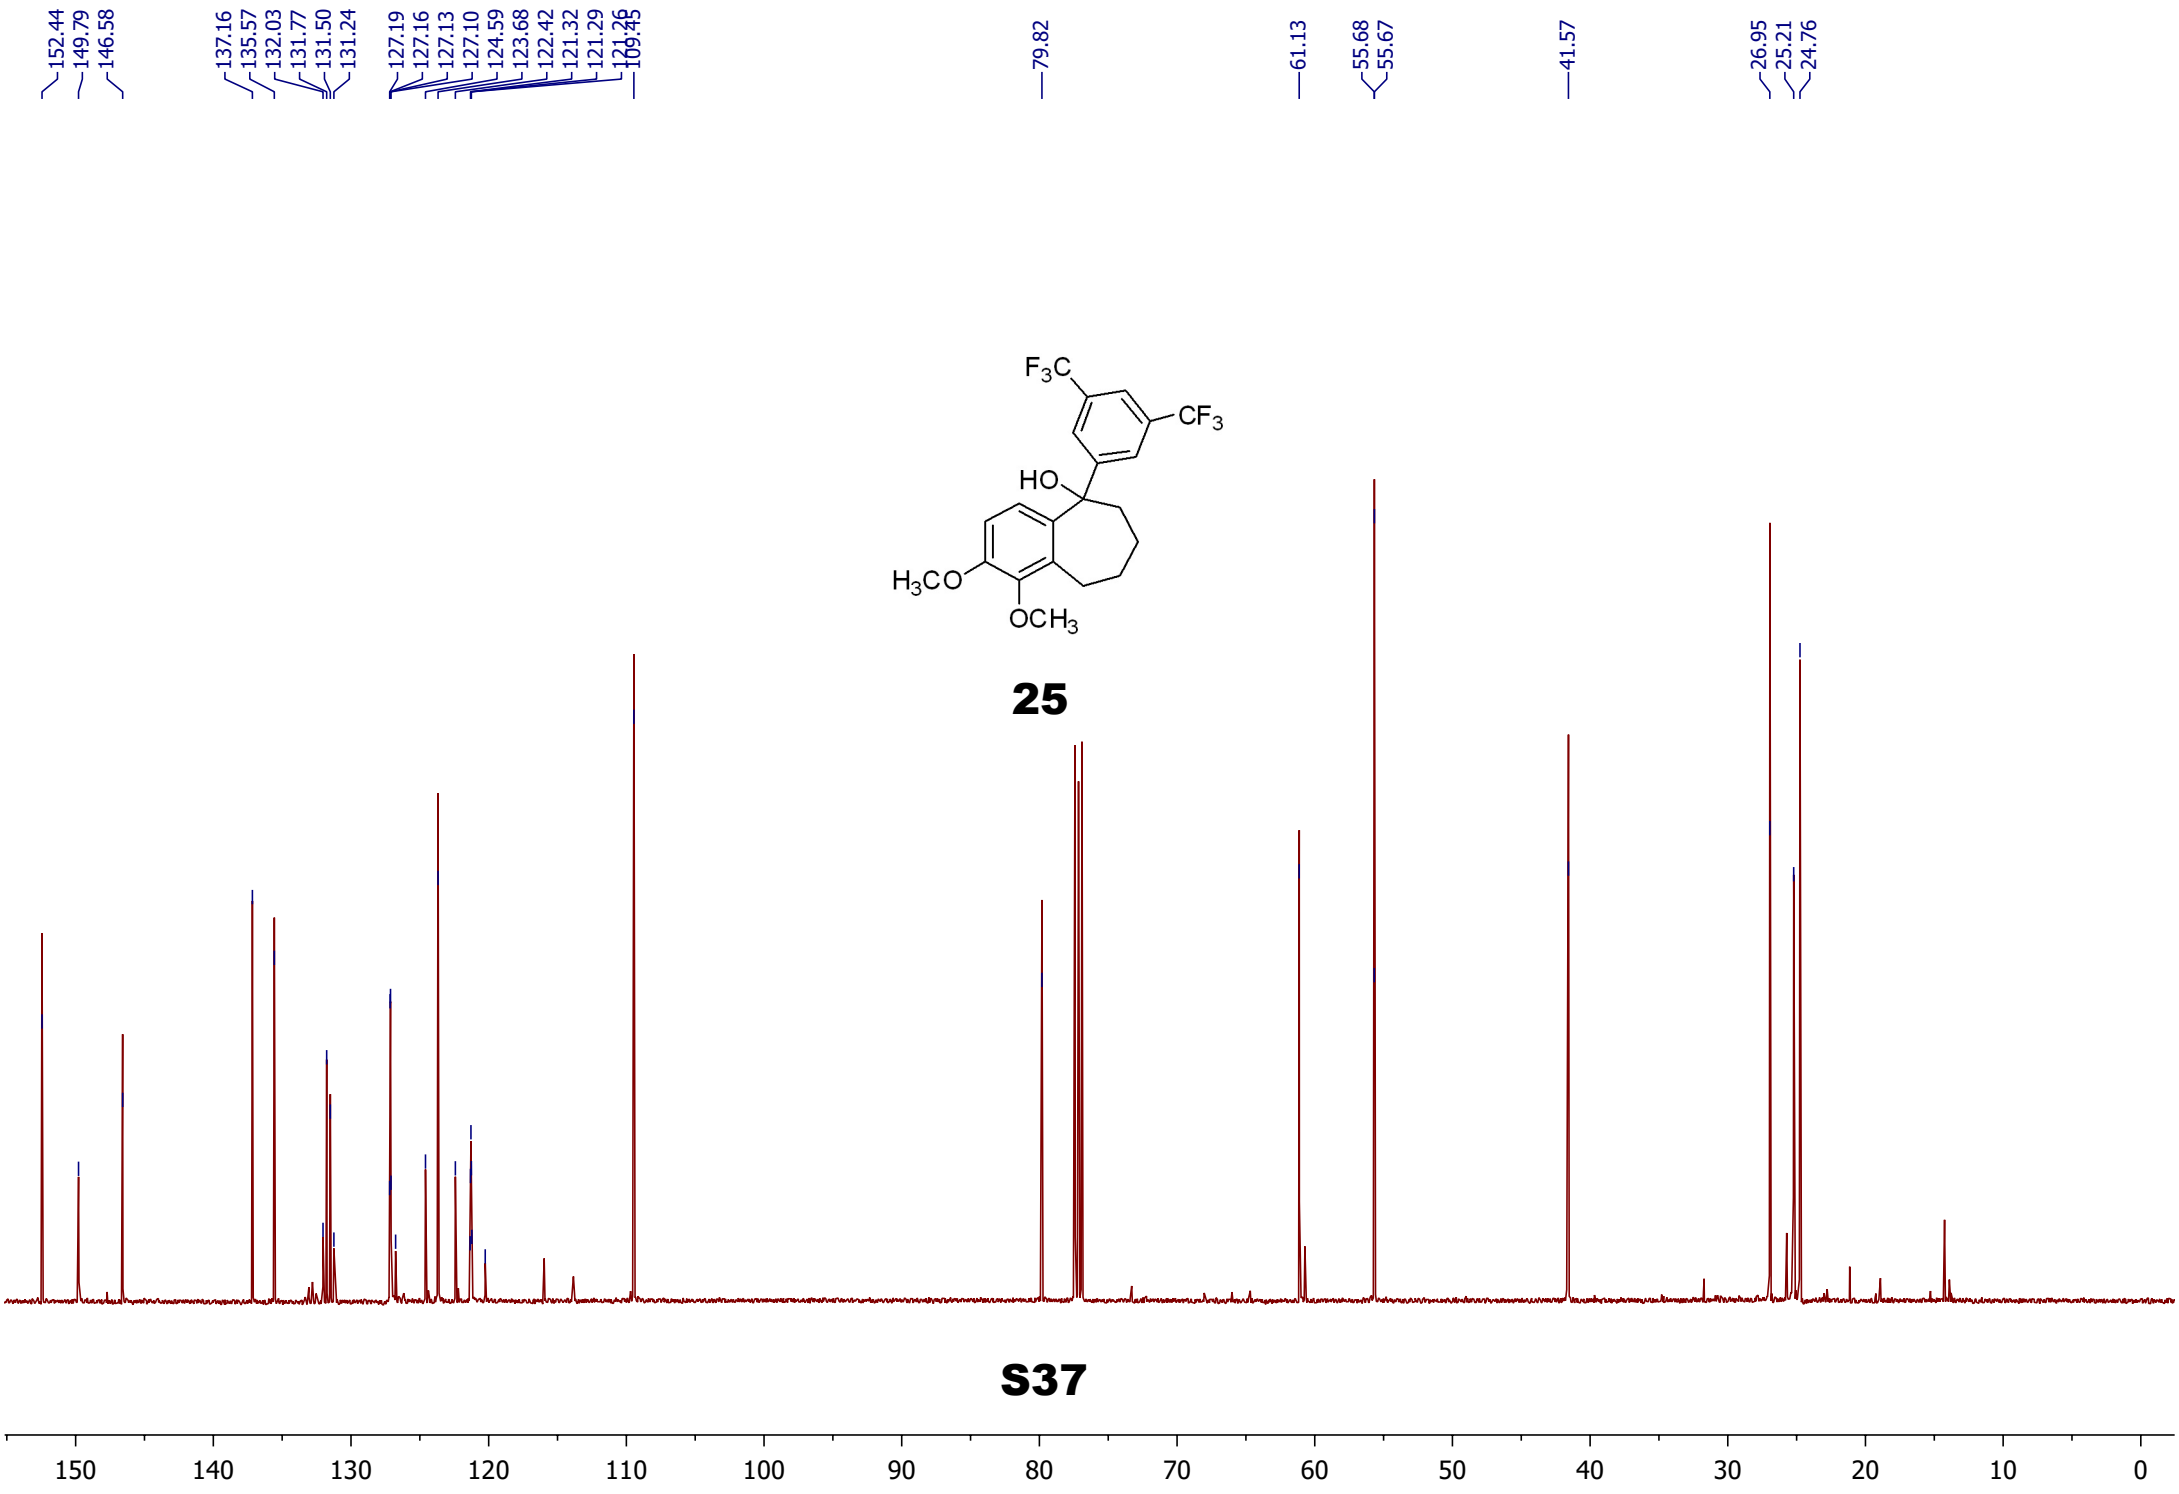

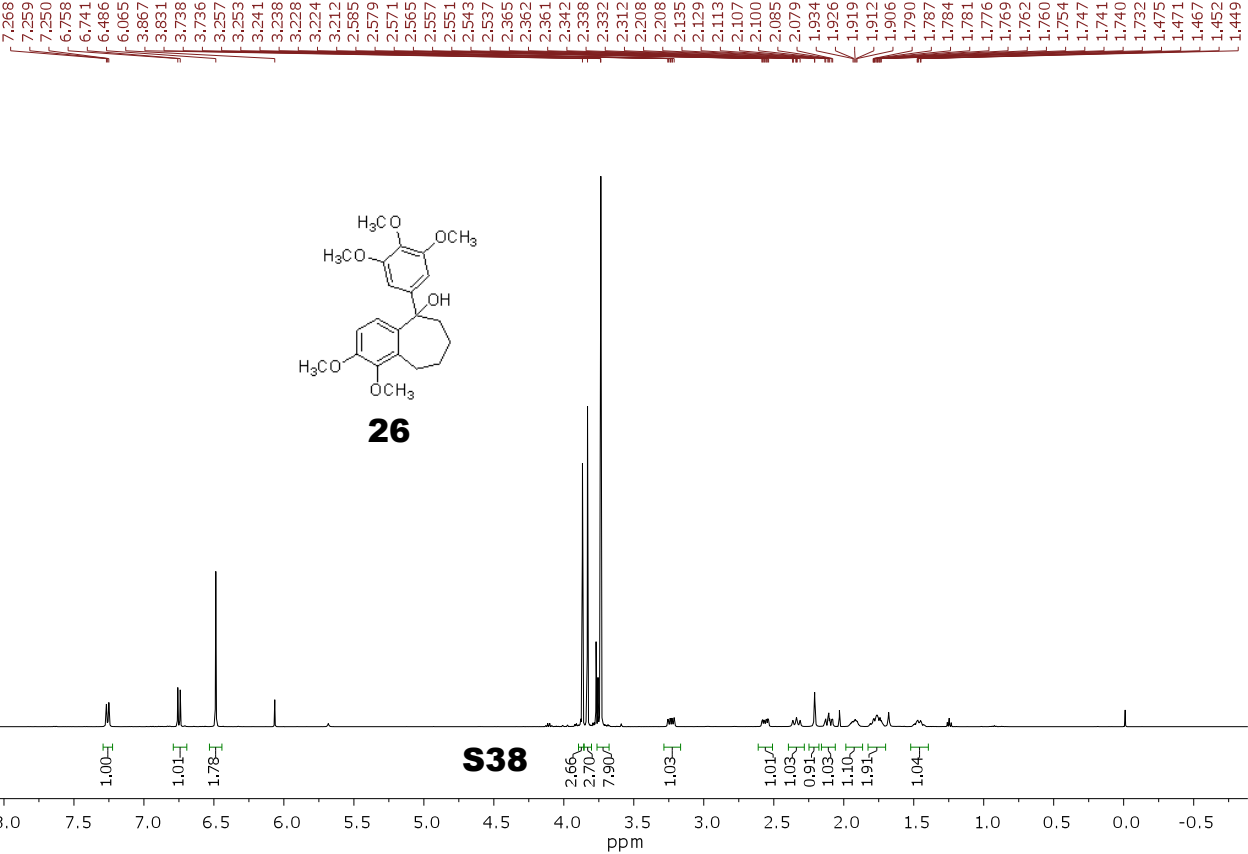

152.977  
151.804  
146.234  
141.605  
138.589  
137.192  
135.515

122.785  
108.766  
104.232

79.914

60.966  
60.807  
56.063  
55.531

41.282

27.131  
26.276  
25.064

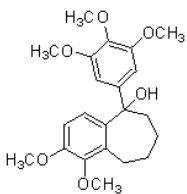

**26**

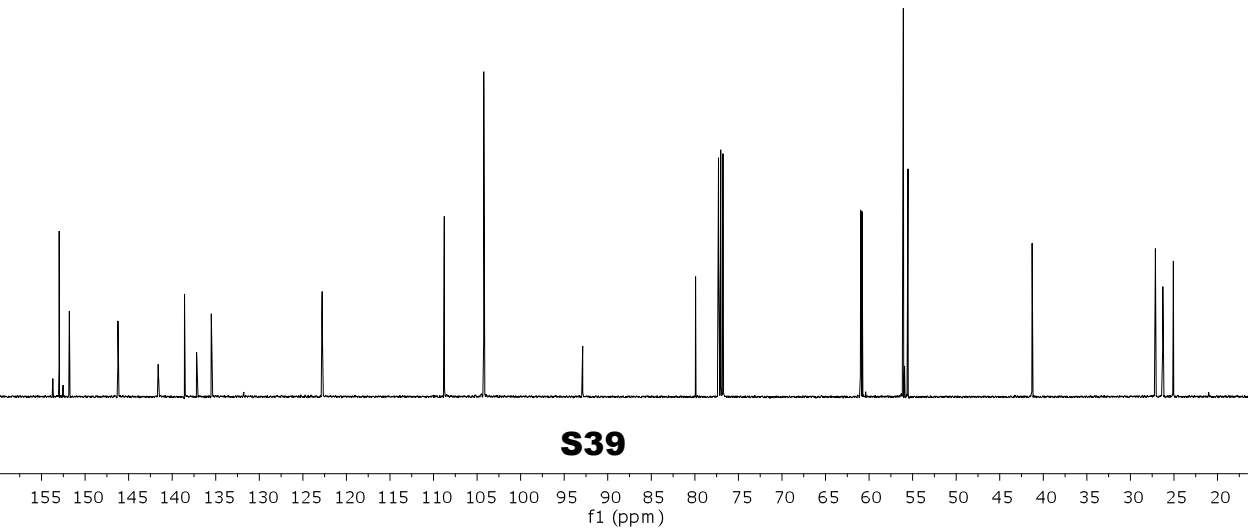

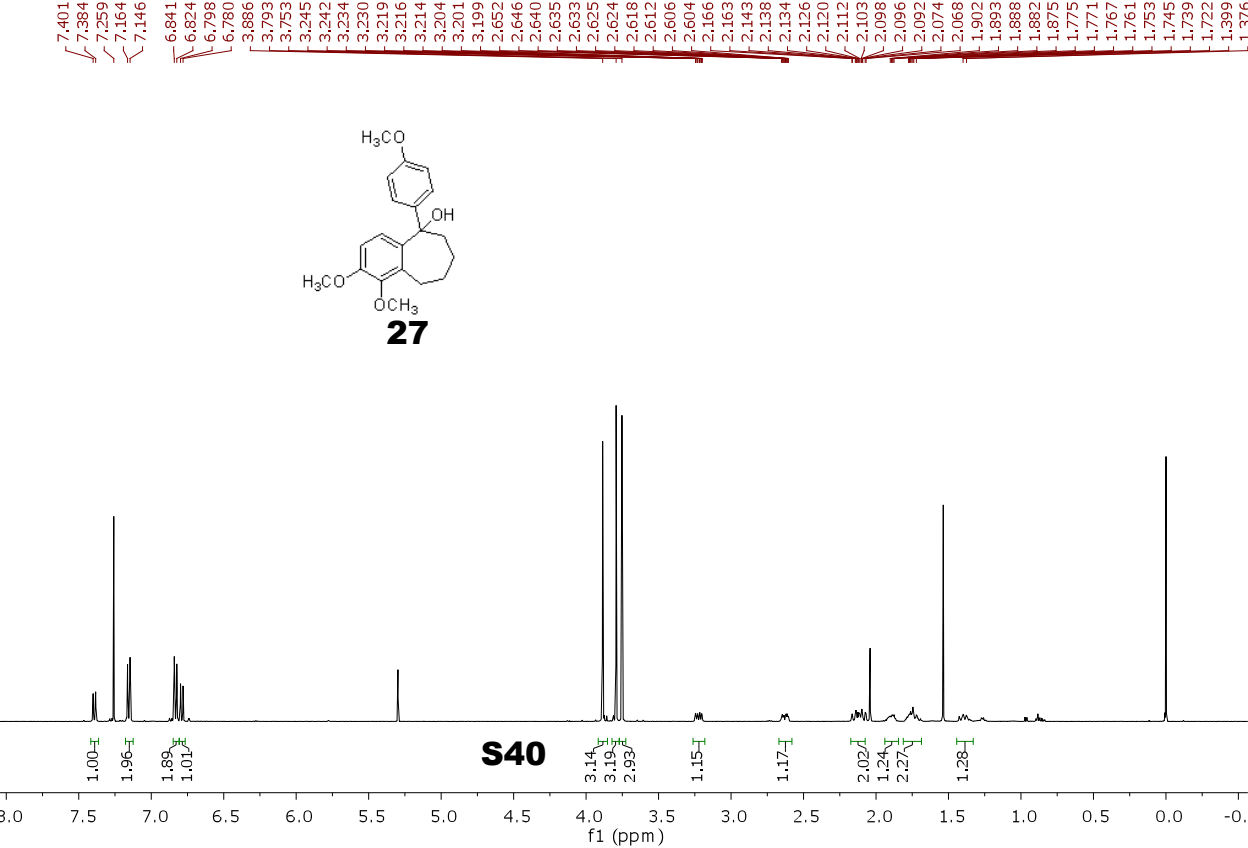



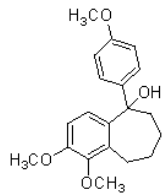

**27**

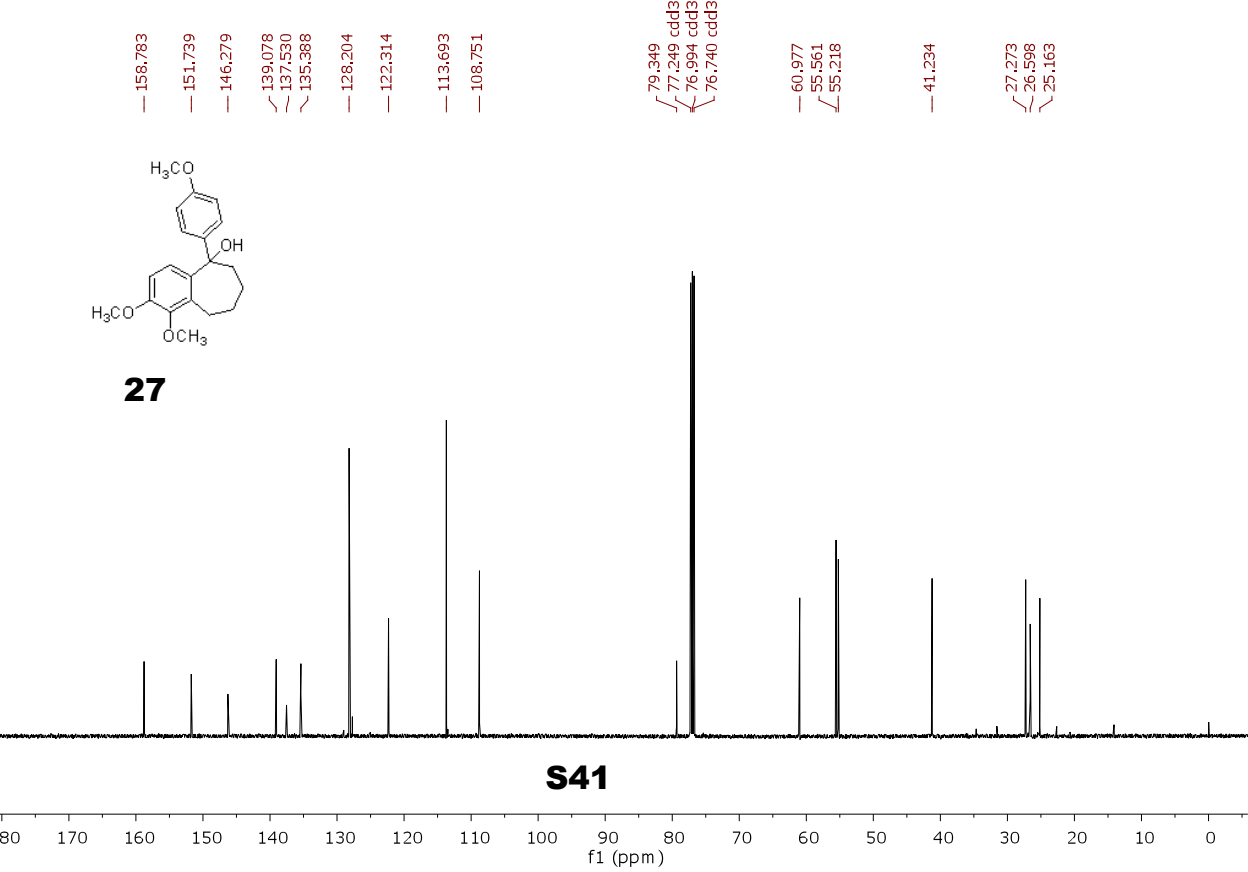

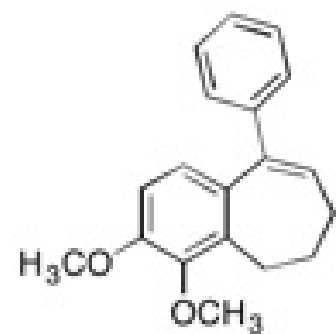

**28**

7.326  
7.317  
7.301  
7.293  
7.286  
7.277

6.778

6.419  
6.404  
6.389

3.910  
3.898

2.820  
2.806  
2.792  
2.219  
2.205  
2.191  
2.177  
2.163  
2.076  
2.036  
2.022  
2.008  
1.993

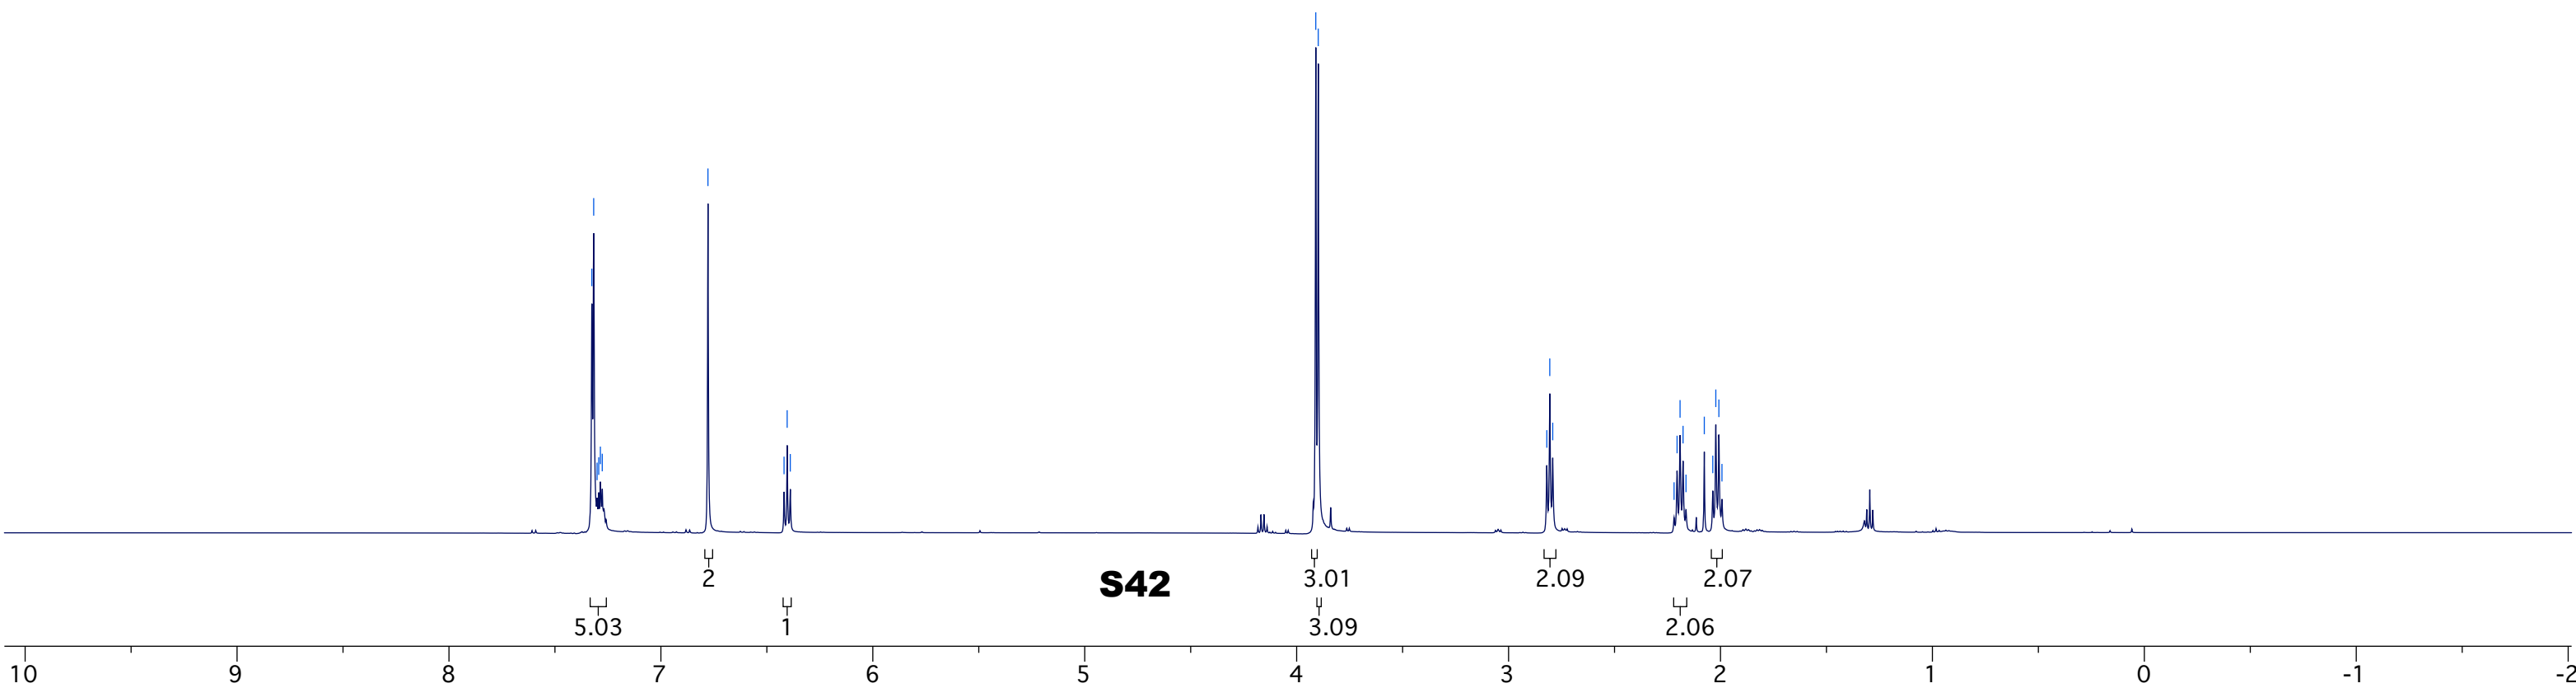

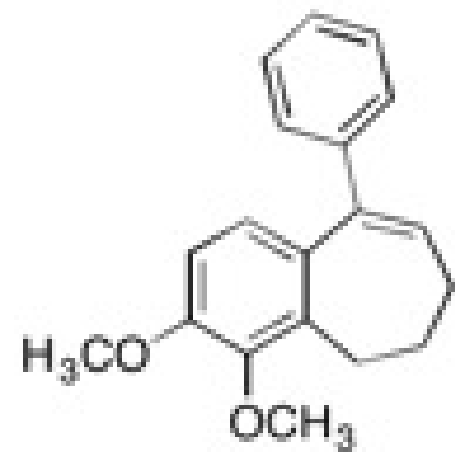

**28**

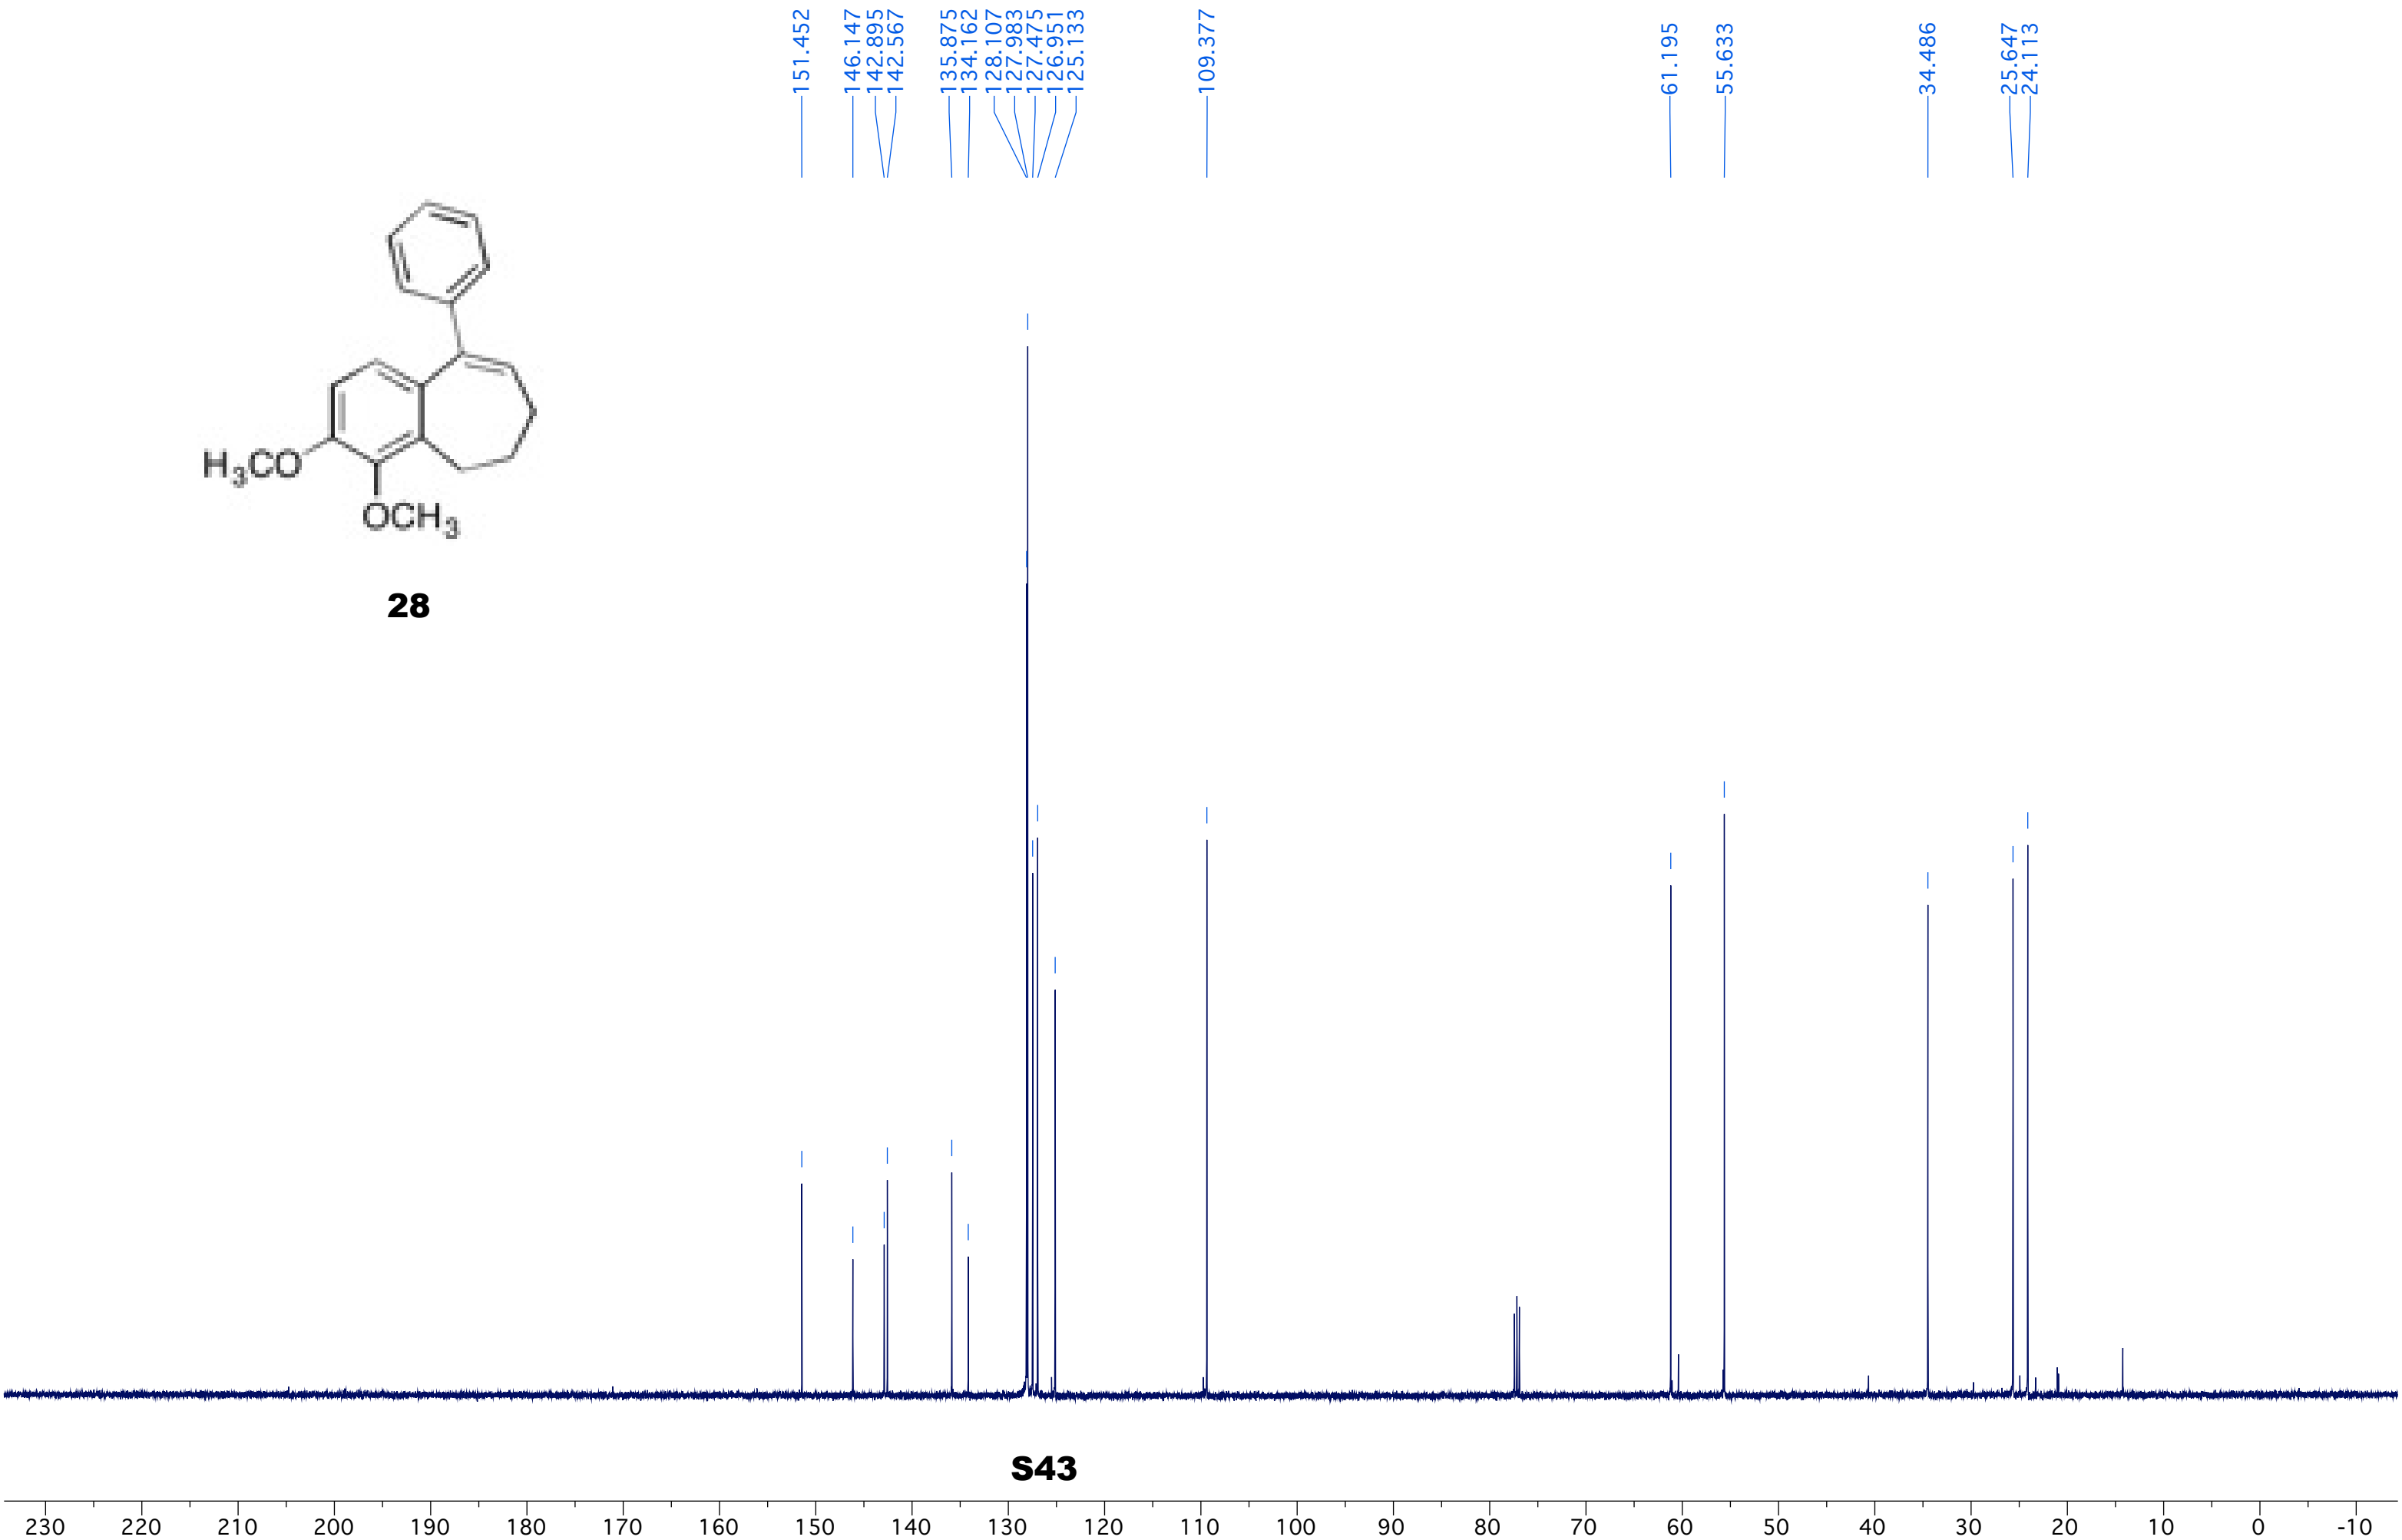

**HPLC for Compound 28**

=====  
Acq. Operator : Christine  
Acq. Instrument : Instrument 1 Location : -  
Injection Date : 1/9/2014 3:11:56 PM  
Acq. Method : C:\CHEM32\1\METHODS\MASTERMETHOD.M  
Last changed : 1/9/2014 3:02:55 PM by Christine  
Analysis Method : C:\CHEM32\1\DATA\CHRISTINE\CAH\_3\_13400010.D\DA.M (MASTERMETHOD.M)  
Last changed : 2/25/2014 11:06:43 AM by Christine

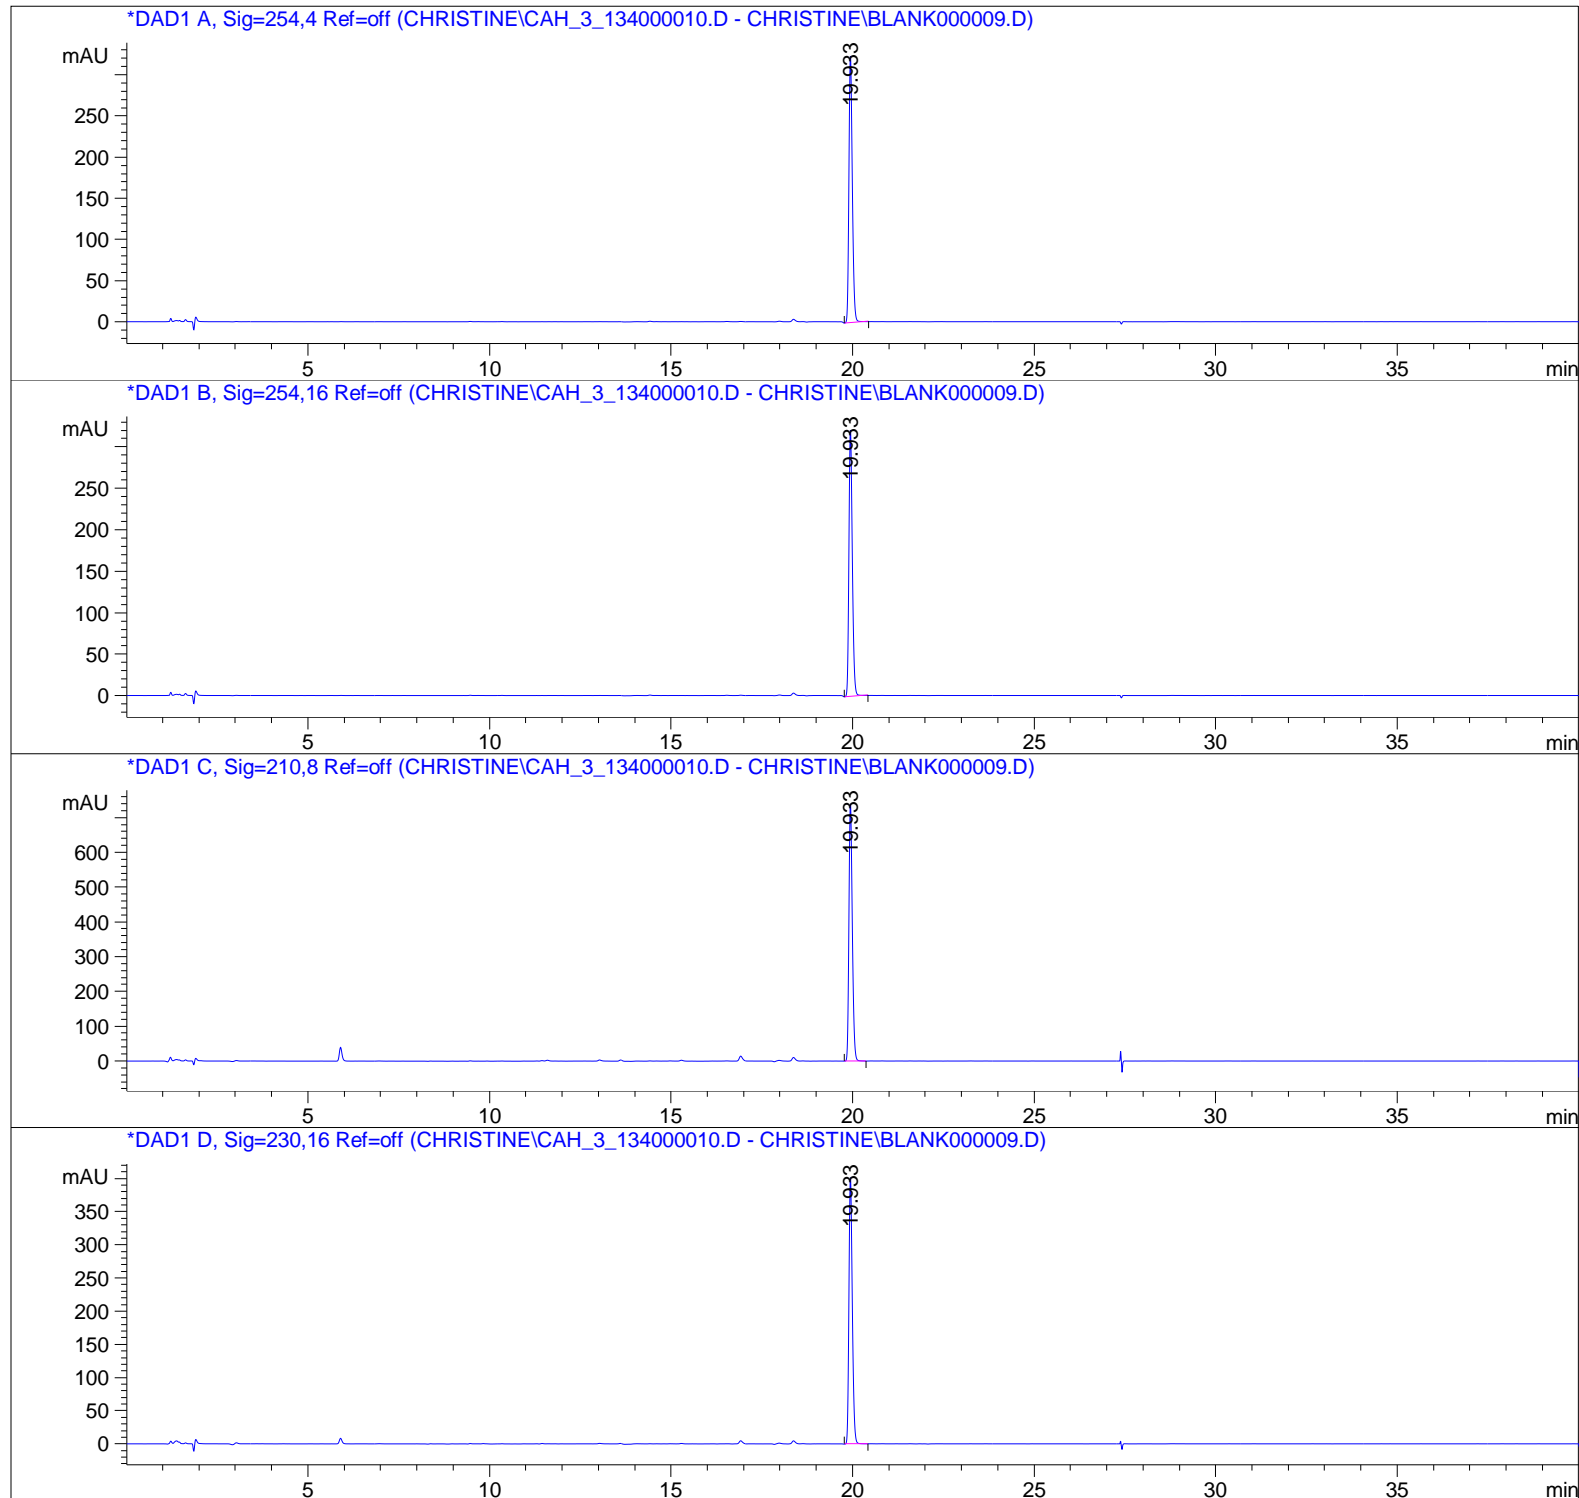**S44**

Sample Name: CAH\_3\_134

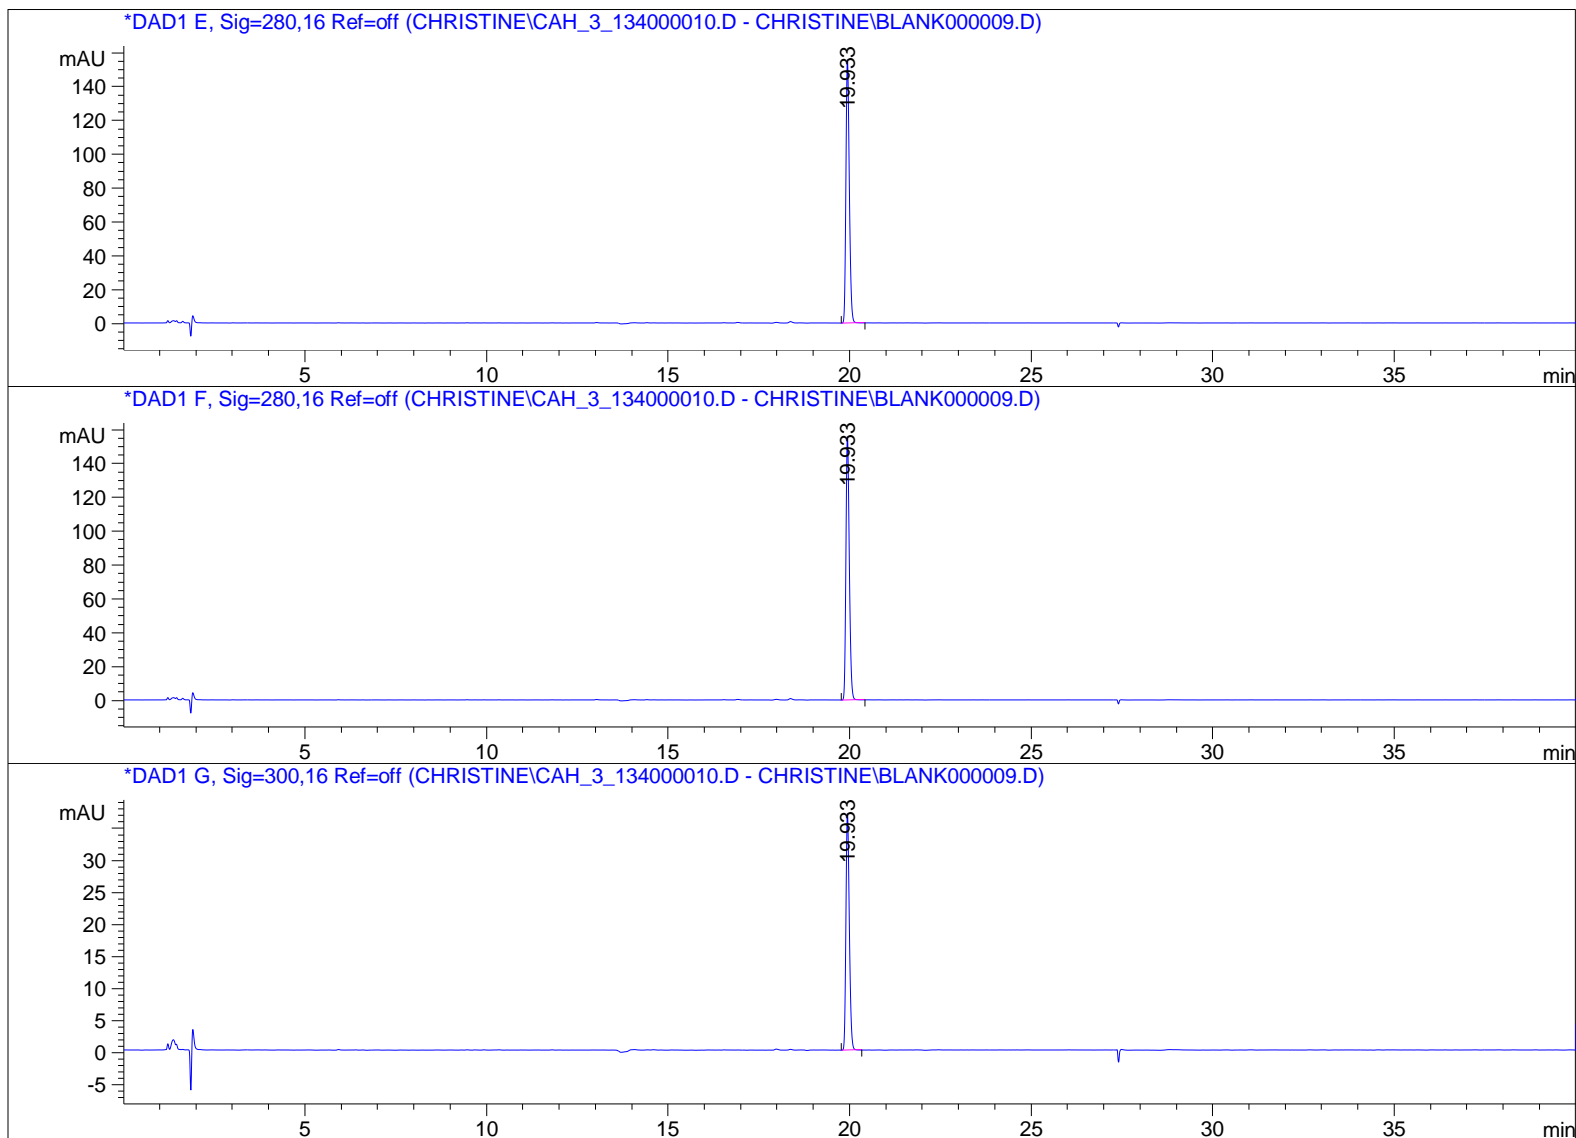

=====  
 Area Percent Report  
 =====

Sorted By : Signal  
 Multiplier : 1.0000  
 Dilution : 1.0000  
 Use Multiplier & Dilution Factor with ISTDs

Signal 1: DAD1 A, Sig=254,4 Ref=off  
 Signal has been modified after loading from rawdata file!

| Peak # | RetTime [min] | Type | Width [min] | Area [mAU*s] | Height [mAU] | Area %   |
|--------|---------------|------|-------------|--------------|--------------|----------|
| 1      | 19.933        | BB   | 0.1000      | 2109.92017   | 323.73047    | 100.0000 |

Totals : 2109.92017 323.73047

**S45**

Sample Name: CAH\_3\_134

Signal 2: DAD1 B, Sig=254,16 Ref=off

Signal has been modified after loading from rawdata file!

| Peak # | RetTime [min] | Type | Width [min] | Area [mAU*s] | Height [mAU] | Area %   |
|--------|---------------|------|-------------|--------------|--------------|----------|
| 1      | 19.933        | BB   | 0.1000      | 2092.94263   | 321.40930    | 100.0000 |

Totals :                                   2092.94263   321.40930

Signal 3: DAD1 C, Sig=210,8 Ref=off

Signal has been modified after loading from rawdata file!

| Peak # | RetTime [min] | Type | Width [min] | Area [mAU*s] | Height [mAU] | Area %   |
|--------|---------------|------|-------------|--------------|--------------|----------|
| 1      | 19.933        | BB   | 0.0995      | 4793.37109   | 740.26355    | 100.0000 |

Totals :                                   4793.37109   740.26355

Signal 4: DAD1 D, Sig=230,16 Ref=off

Signal has been modified after loading from rawdata file!

| Peak # | RetTime [min] | Type | Width [min] | Area [mAU*s] | Height [mAU] | Area %   |
|--------|---------------|------|-------------|--------------|--------------|----------|
| 1      | 19.933        | BB   | 0.0994      | 2596.50854   | 401.65051    | 100.0000 |

Totals :                                   2596.50854   401.65051

Signal 5: DAD1 E, Sig=280,16 Ref=off

Signal has been modified after loading from rawdata file!

| Peak # | RetTime [min] | Type | Width [min] | Area [mAU*s] | Height [mAU] | Area %   |
|--------|---------------|------|-------------|--------------|--------------|----------|
| 1      | 19.933        | BB   | 0.0995      | 1007.30444   | 155.69983    | 100.0000 |

Totals :                                   1007.30444   155.69983

**S46**

Sample Name: CAH\_3\_134

Signal 6: DAD1 F, Sig=280,16 Ref=off

Signal has been modified after loading from rawdata file!

| Peak # | RetTime [min] | Type | Width [min] | Area [mAU*s] | Height [mAU] | Area %   |
|--------|---------------|------|-------------|--------------|--------------|----------|
| 1      | 19.933        | BB   | 0.0995      | 1007.30444   | 155.69983    | 100.0000 |

Totals : 1007.30444 155.69983

Signal 7: DAD1 G, Sig=300,16 Ref=off

Signal has been modified after loading from rawdata file!

| Peak # | RetTime [min] | Type | Width [min] | Area [mAU*s] | Height [mAU] | Area %   |
|--------|---------------|------|-------------|--------------|--------------|----------|
| 1      | 19.933        | BB   | 0.1001      | 240.84787    | 36.89976     | 100.0000 |

Totals : 240.84787 36.89976

=====  
\*\*\* End of Report \*\*\*

**S47**

# HRMS for Compound 28

NL:  
8.09E5  
C<sub>19</sub>H<sub>21</sub>O<sub>2</sub>:  
C<sub>19</sub>H<sub>21</sub>O<sub>2</sub>  
pa Chrg 1

NL:  
8.09E5  
C<sub>19</sub>H<sub>20</sub>O<sub>2</sub>Na:  
C<sub>19</sub>H<sub>20</sub>O<sub>2</sub>Na<sub>1</sub>  
pa Chrg 1

NL:  
1.69E8  
CAH\_3\_134\_140115  
144316#1 RT: 0.00  
AV: 1 T: FTMS + p  
ESI Full ms  
[100.00-1000.00]

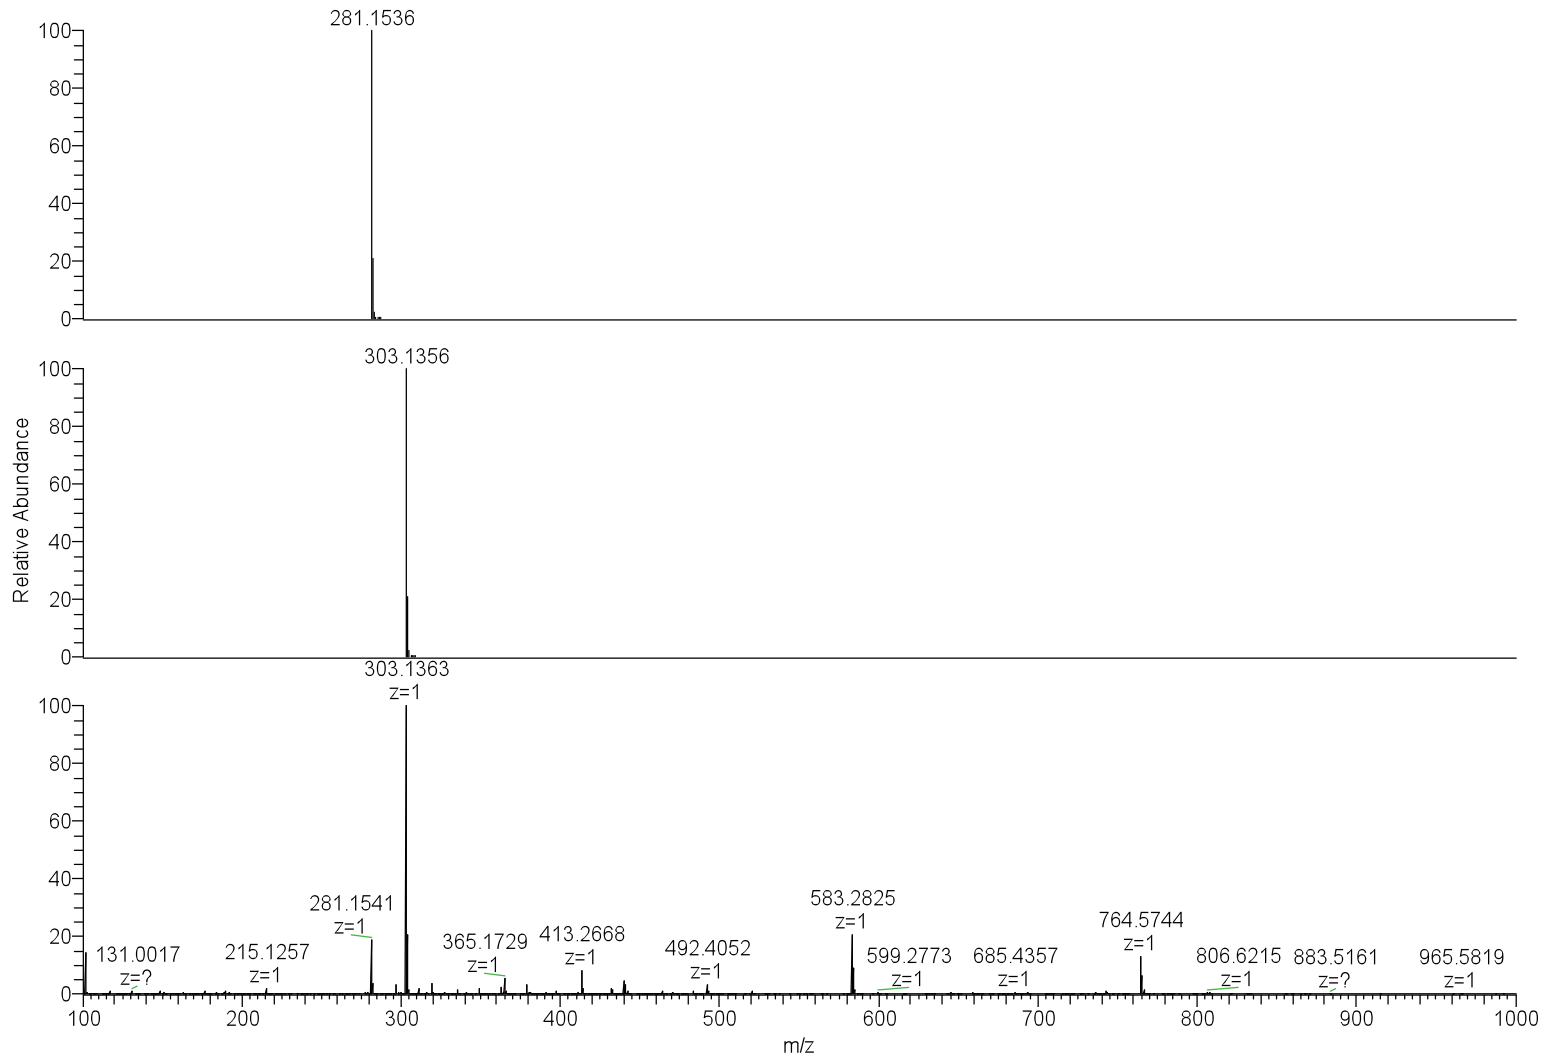



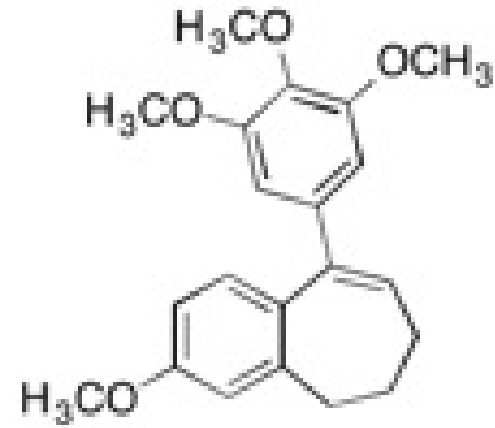

**29**

6.919  
6.902  
6.764  
6.759  
6.669  
6.664  
6.652  
6.647  
6.449  
6.302  
6.287  
6.272

4.037  
4.023  
3.789  
3.729  
3.710

2.582  
2.569  
2.555  
2.120  
2.106  
2.092  
2.078  
2.062  
1.947  
1.916  
1.902  
1.888  
1.873

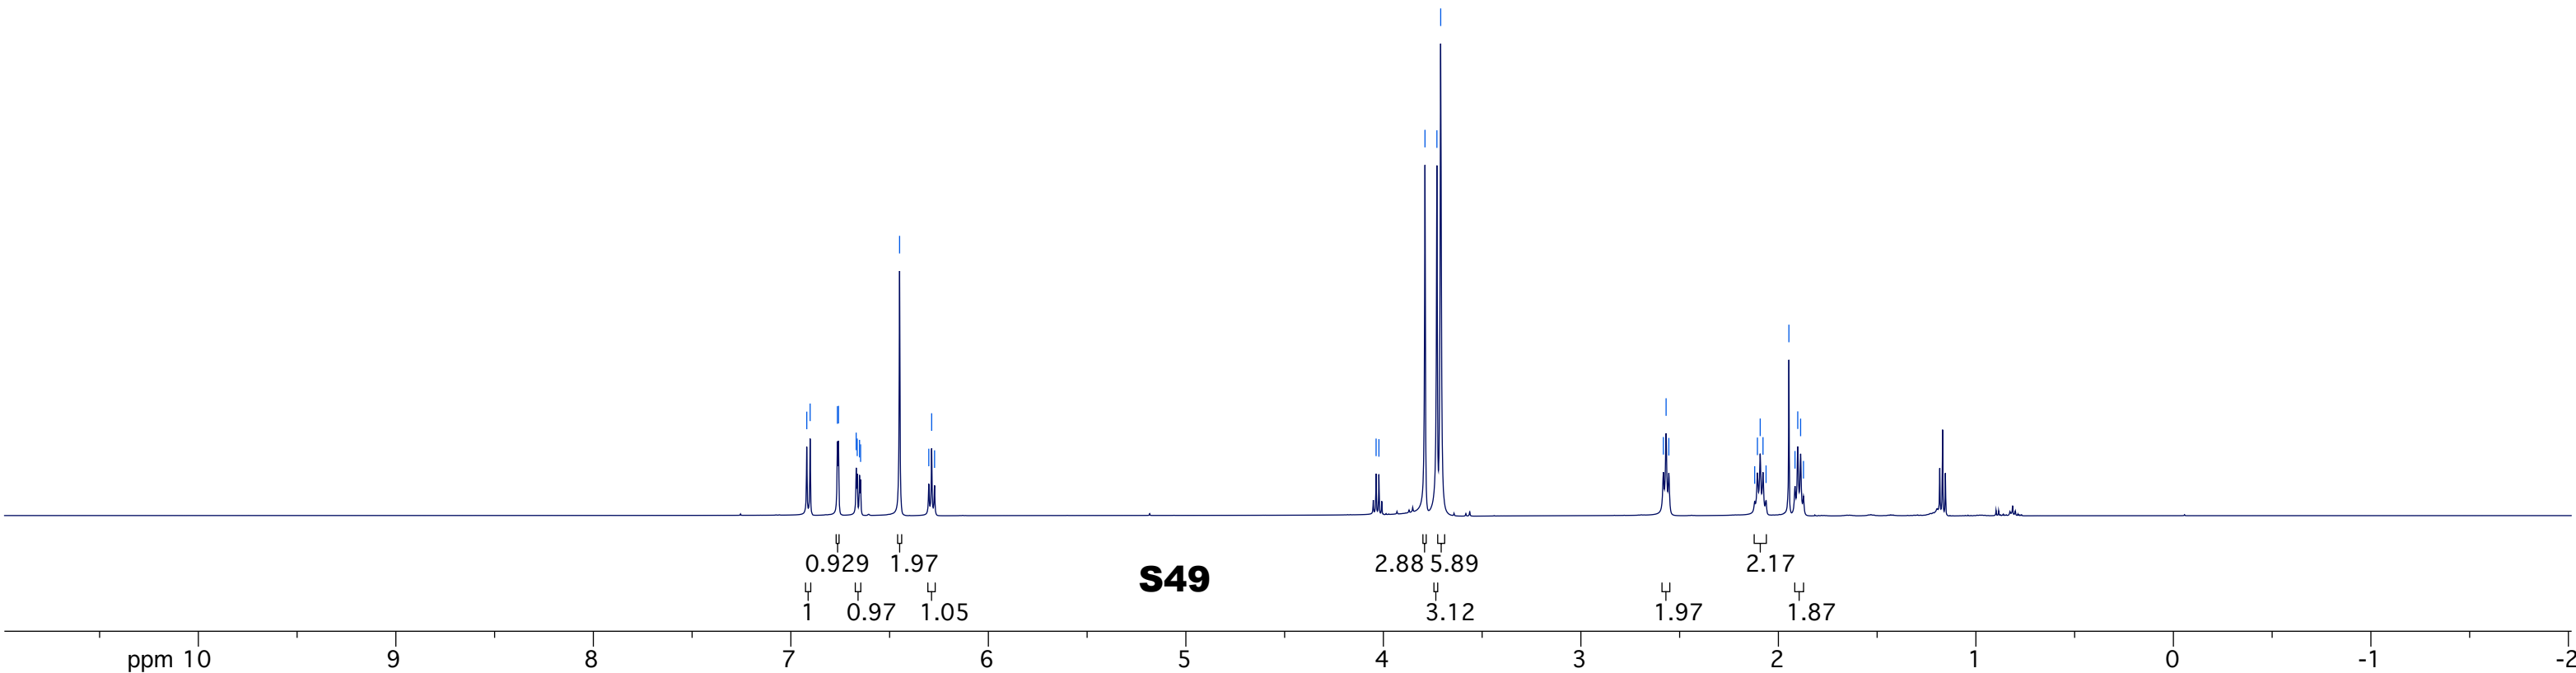

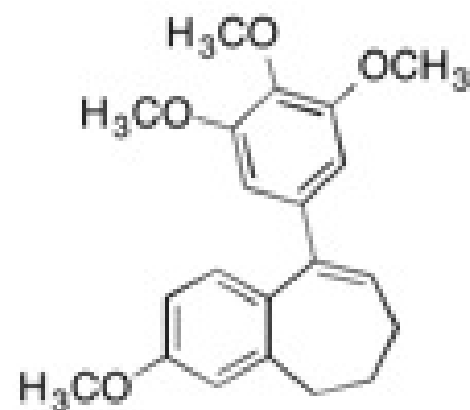

**29**

158.453  
152.832  
143.666  
142.719  
138.355  
137.315  
132.301  
130.471  
126.838  
113.832  
111.125  
105.138  
60.664  
55.905  
54.919  
35.030  
32.732  
25.418

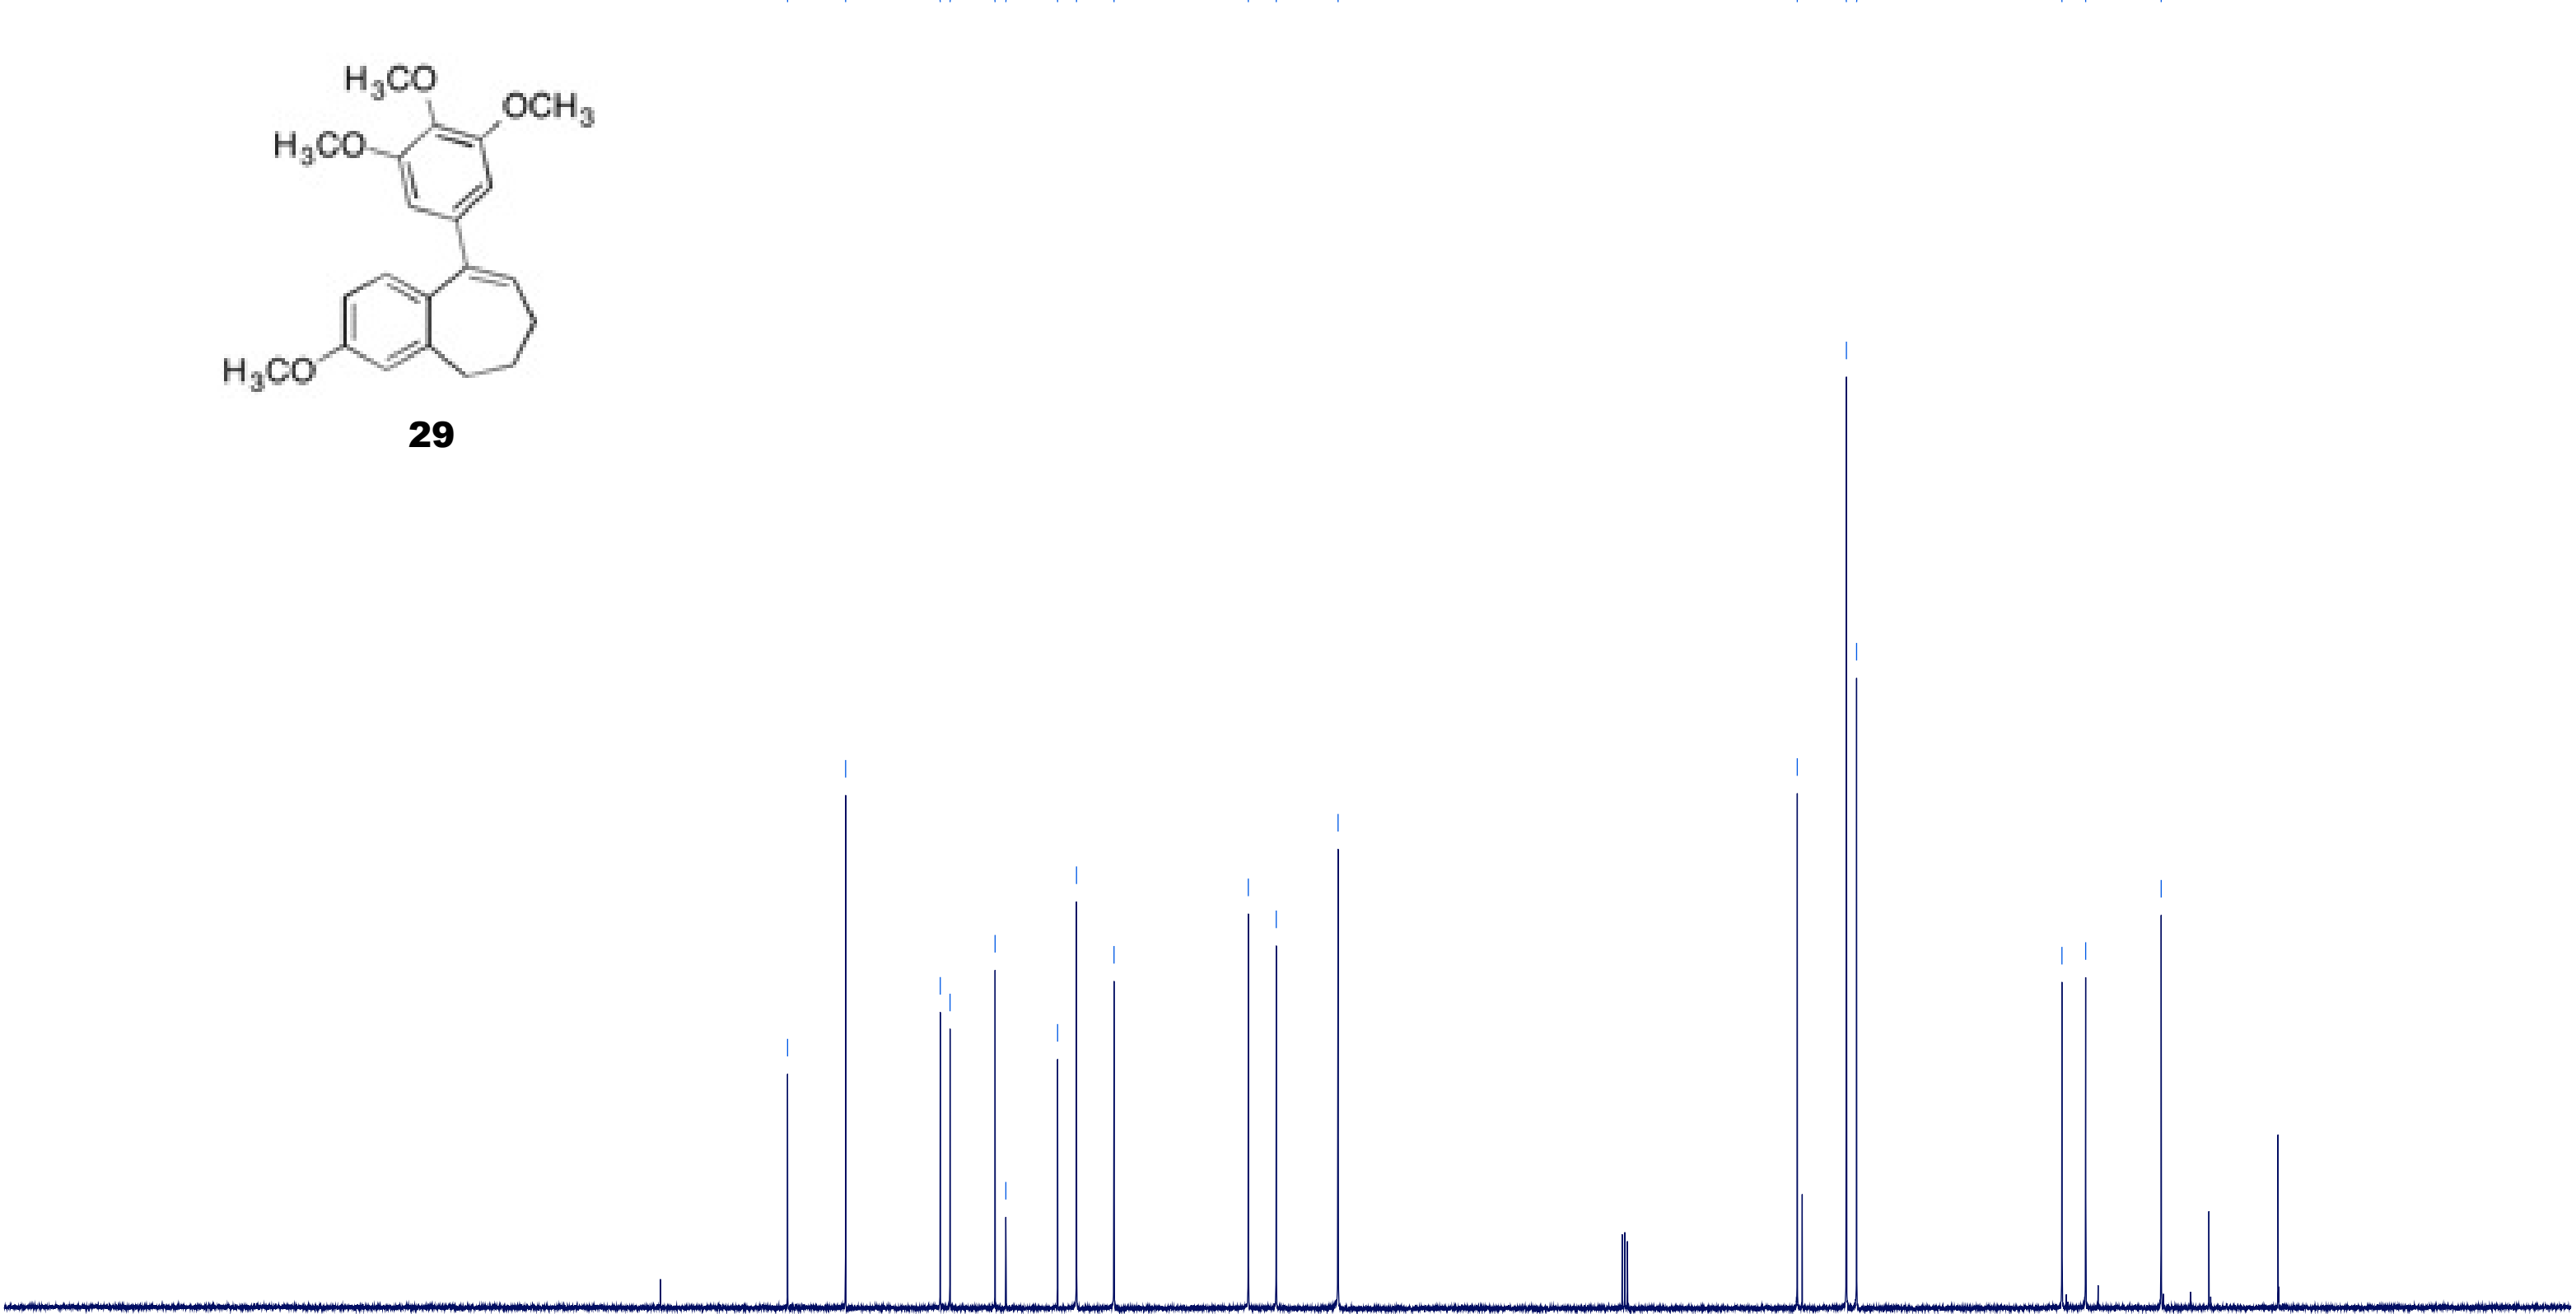

**S50**

230 220 210 200 190 180 170 160 150 140 130 120 110 100 90 80 70 60 50 40 30 20 10 0 -10

# HPLC for compound 29

=====  
Acq. Operator : Christine  
Acq. Instrument : Instrument 1 Location : -  
Injection Date : 10/9/2013 11:38:16 AM  
Acq. Method : C:\CHEM32\1\METHODS\MASTERMETHOD.M  
Last changed : 10/9/2013 11:36:20 AM by Christine  
Analysis Method : C:\CHEM32\1\DATA\CHRISTINE\CAH\_3\_123000004.D\DA.M (MASTERMETHOD.M)  
Last changed : 10/9/2013 3:39:32 PM by Christine

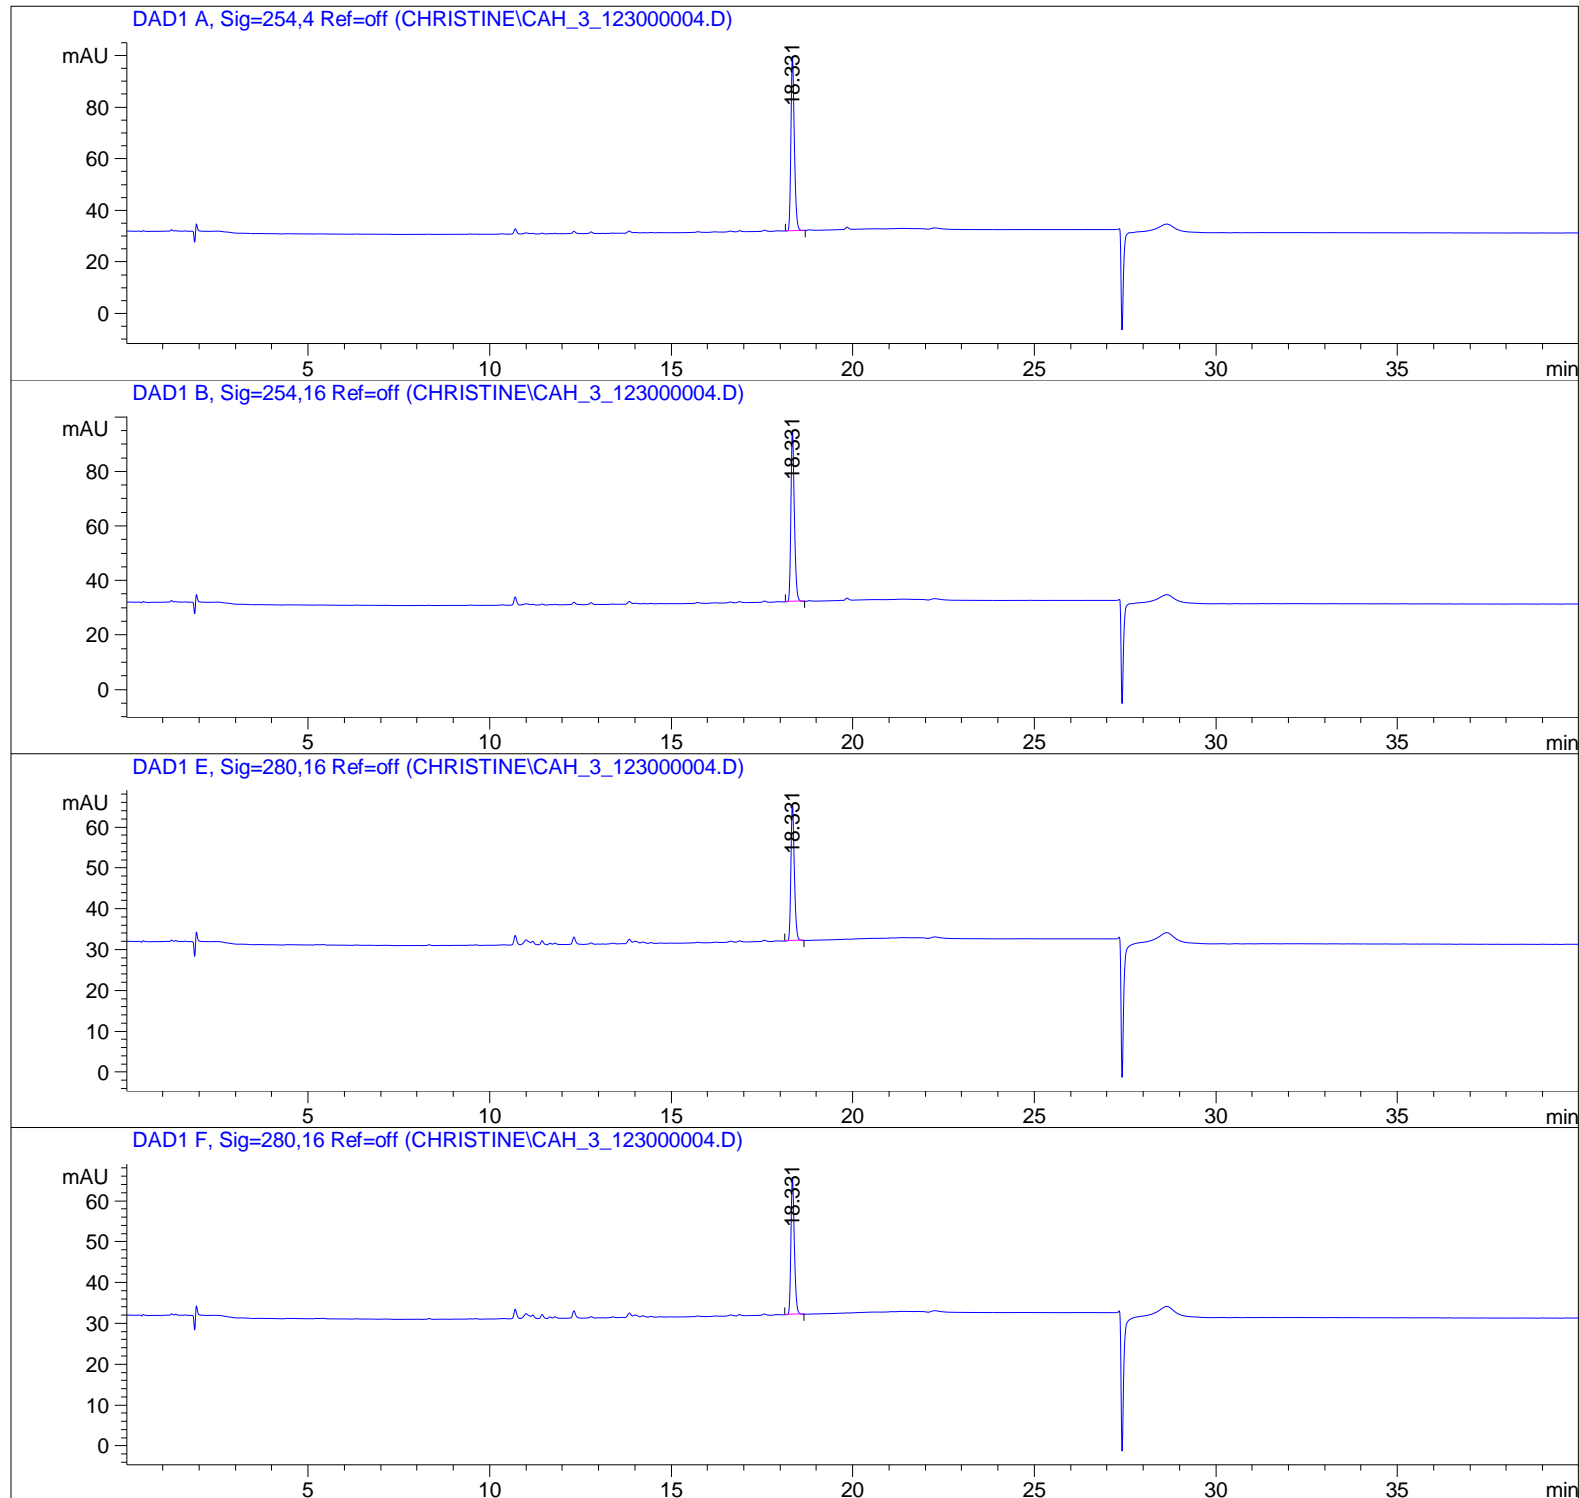**S51**

Sample Name: CAH\_3\_123

```

=====
                          Area Percent Report
=====

```

```

Sorted By      :      Signal
Multiplier     :      1.0000
Dilution      :      1.0000
Use Multiplier & Dilution Factor with ISTDs

```

Signal 1: DAD1 A, Sig=254,4 Ref=off

| Peak # | RetTime [min] | Type | Width [min] | Area [mAU*s] | Height [mAU] | Area %   |
|--------|---------------|------|-------------|--------------|--------------|----------|
| 1      | 18.331        | BB   | 0.1006      | 444.65436    | 67.72849     | 100.0000 |

```
Totals :                444.65436    67.72849
```

Signal 2: DAD1 B, Sig=254,16 Ref=off

| Peak # | RetTime [min] | Type | Width [min] | Area [mAU*s] | Height [mAU] | Area %   |
|--------|---------------|------|-------------|--------------|--------------|----------|
| 1      | 18.331        | BB   | 0.1008      | 414.83444    | 63.04776     | 100.0000 |

```
Totals :                414.83444    63.04776
```

Signal 3: DAD1 E, Sig=280,16 Ref=off

| Peak # | RetTime [min] | Type | Width [min] | Area [mAU*s] | Height [mAU] | Area %   |
|--------|---------------|------|-------------|--------------|--------------|----------|
| 1      | 18.331        | BB   | 0.1004      | 220.03041    | 33.57787     | 100.0000 |

```
Totals :                220.03041    33.57787
```

Signal 4: DAD1 F, Sig=280,16 Ref=off

| Peak # | RetTime [min] | Type | Width [min] | Area [mAU*s] | Height [mAU] | Area %   |
|--------|---------------|------|-------------|--------------|--------------|----------|
| 1      | 18.331        | BB   | 0.1004      | 220.03041    | 33.57787     | 100.0000 |

```
Totals :                220.03041    33.57787
```

**S52**

=====  
\*\*\* End of Report \*\*\*

**S53**

# HRMS for compound 29

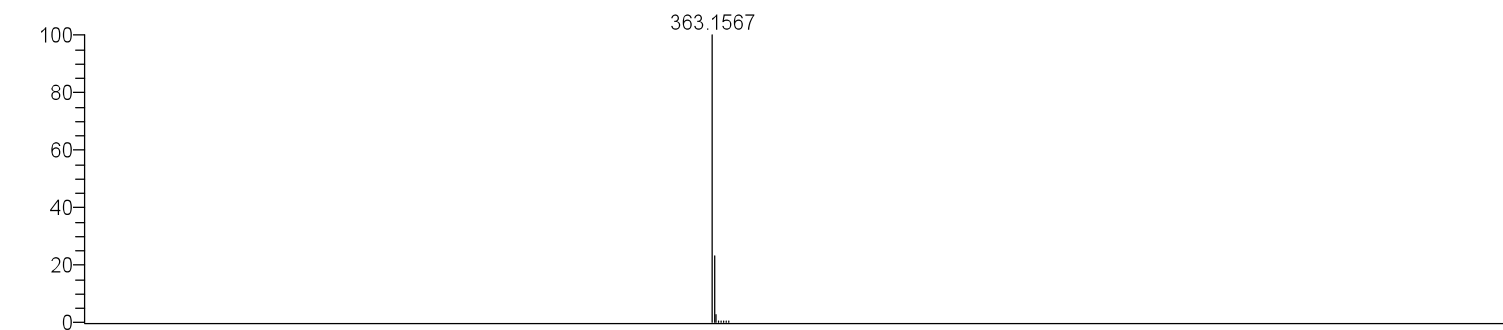

NL:  
7.88E5  
C<sub>21</sub>H<sub>24</sub>O<sub>4</sub>Na:  
C<sub>21</sub>H<sub>24</sub>O<sub>4</sub>Na<sub>1</sub>  
pa Chrg 1

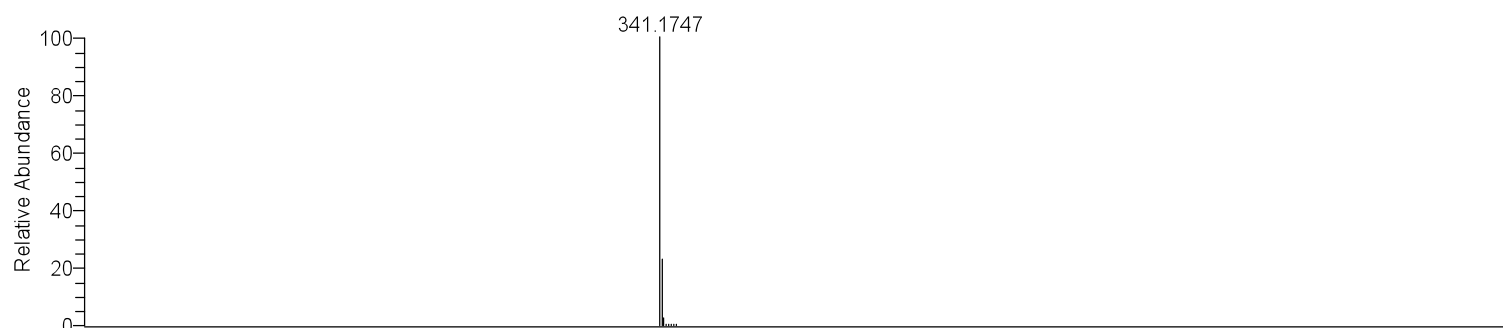

NL:  
7.88E5  
C<sub>21</sub>H<sub>25</sub>O<sub>4</sub>:  
C<sub>21</sub>H<sub>25</sub>O<sub>4</sub>  
pa Chrg 1

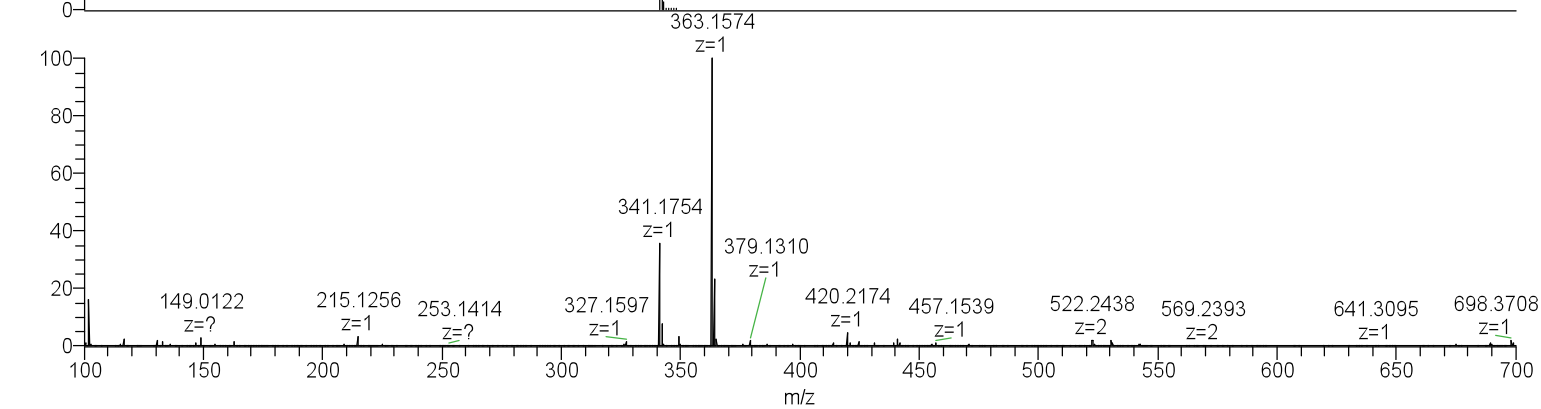

NL:  
1.42E8  
CAH\_3\_123\_140115  
142815#1 RT: 0.01  
AV: 1 T: FTMS + p  
ESI Full ms  
[100.00-700.00]

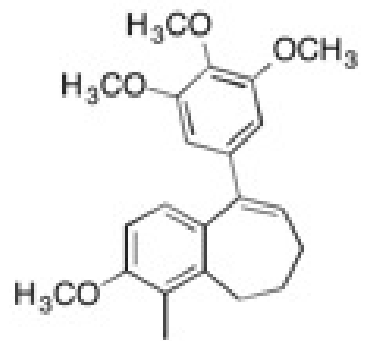

**30**

6.872  
6.855  
6.700  
6.683  
6.534  
6.343  
6.329  
6.314

3.866  
3.820  
3.795

2.698  
2.685  
2.671

2.293  
2.143  
2.129  
2.115  
2.101  
2.087  
2.073  
1.934  
1.920  
1.905  
1.891

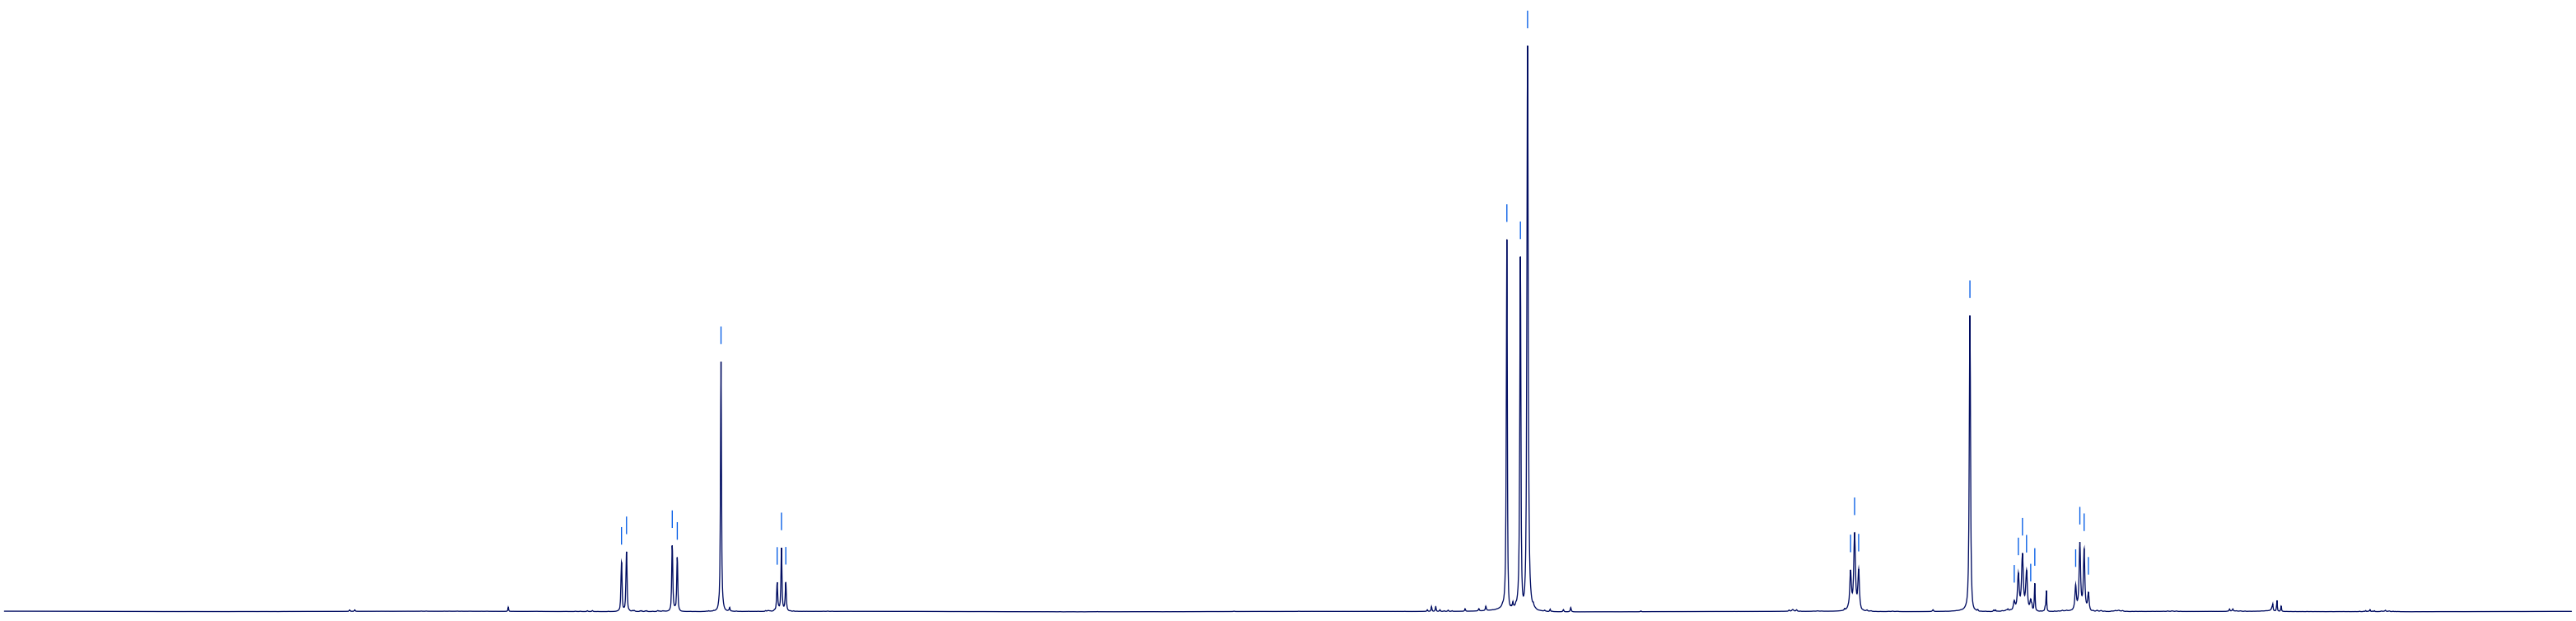

1.07  
1.02  
1  
1.98

**S55**

3.07  
3  
6.05

2.09

2.03  
2.98

2

ppm 8

7

6

5

4

3

2

1

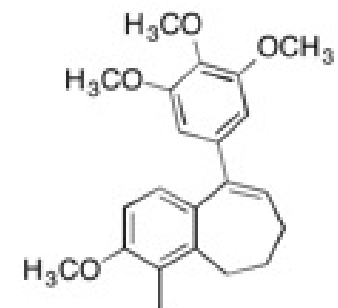

**30**

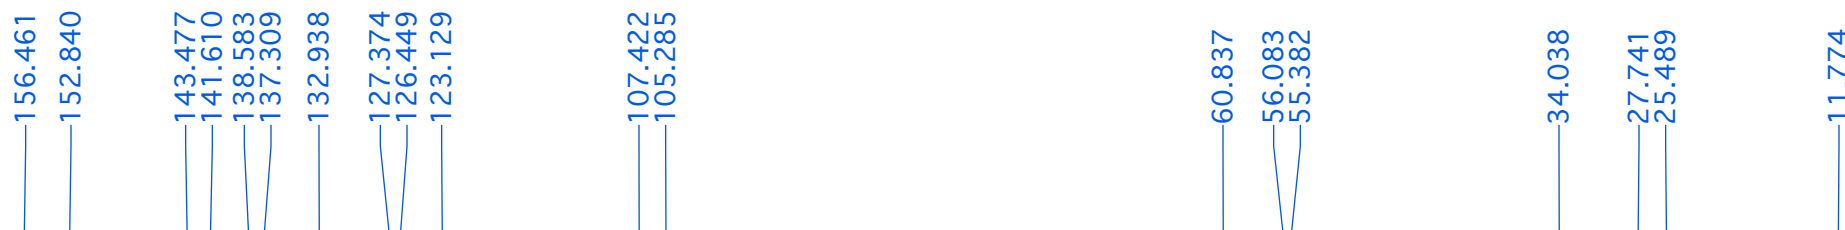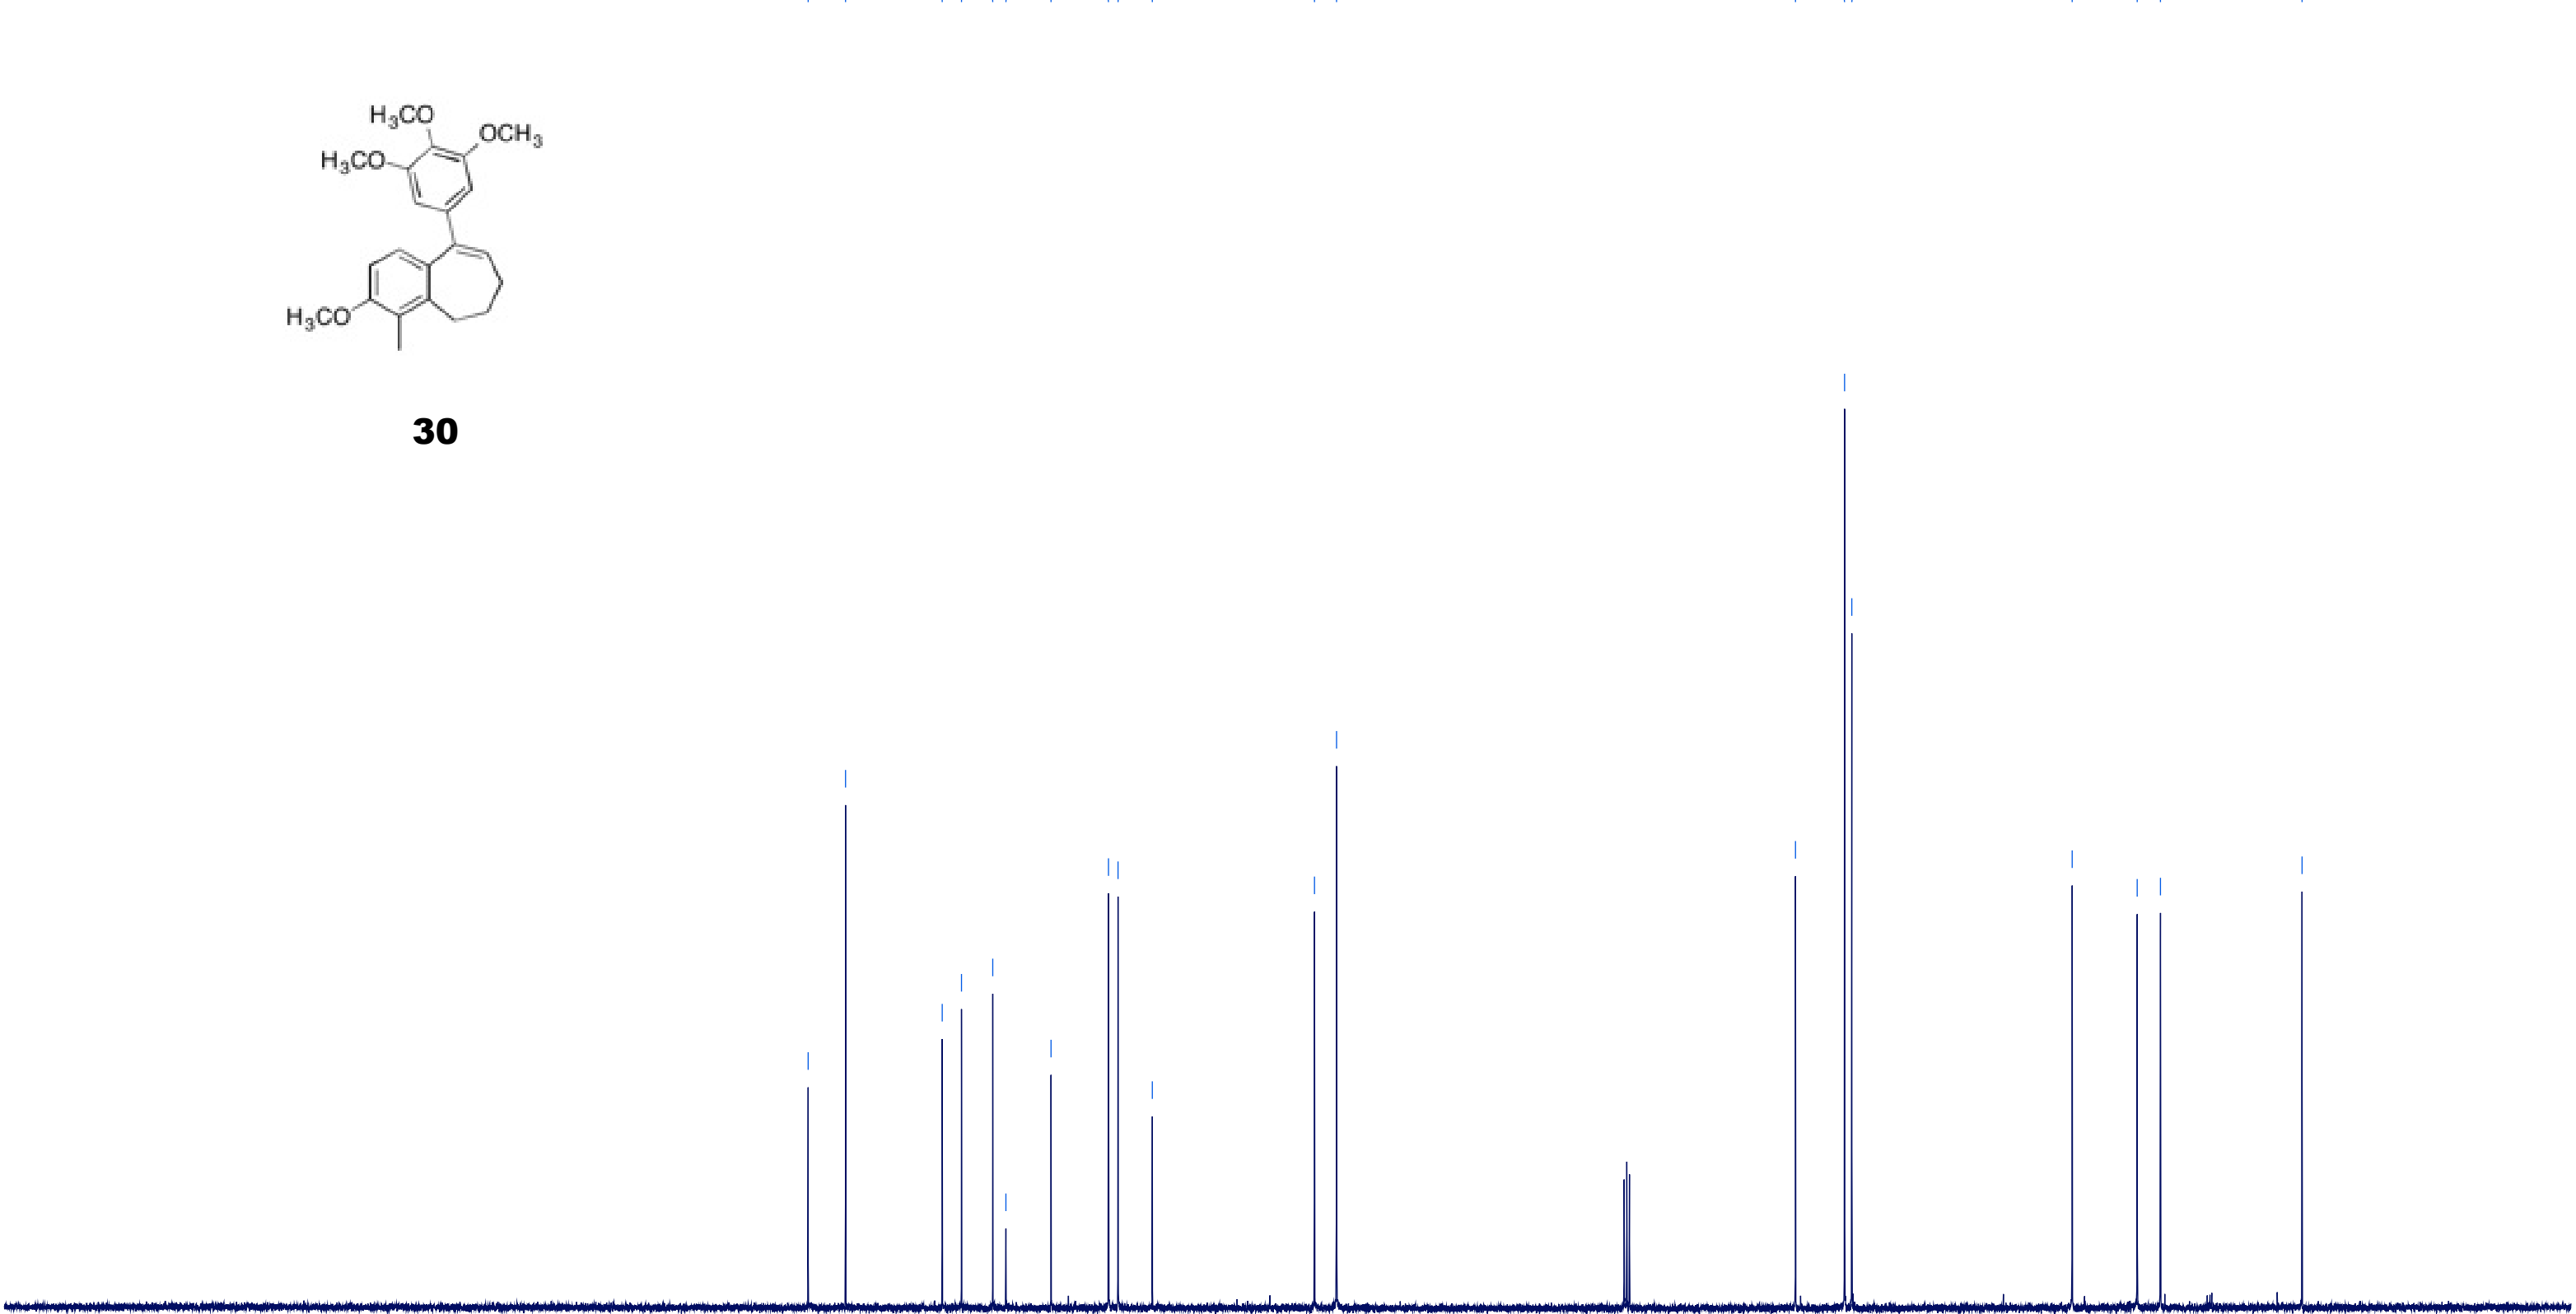

**S56**

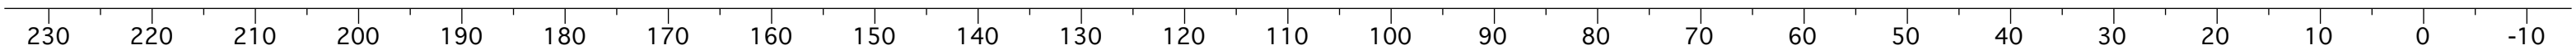



**HPLC for compound 30**

=====  
Acq. Operator : Christine  
Acq. Instrument : Instrument 1 Location : -  
Injection Date : 2/25/2014 9:28:56 AM  
Acq. Method : C:\CHEM32\1\METHODS\MASTERMETHOD.M  
Last changed : 8/6/2013 10:18:10 PM by Blake  
Analysis Method : C:\CHEM32\1\DATA\CHRISTINE\CAH\_4\_1300001.D\DA.M (MASTERMETHOD.M)  
Last changed : 2/25/2014 10:59:23 AM by Christine

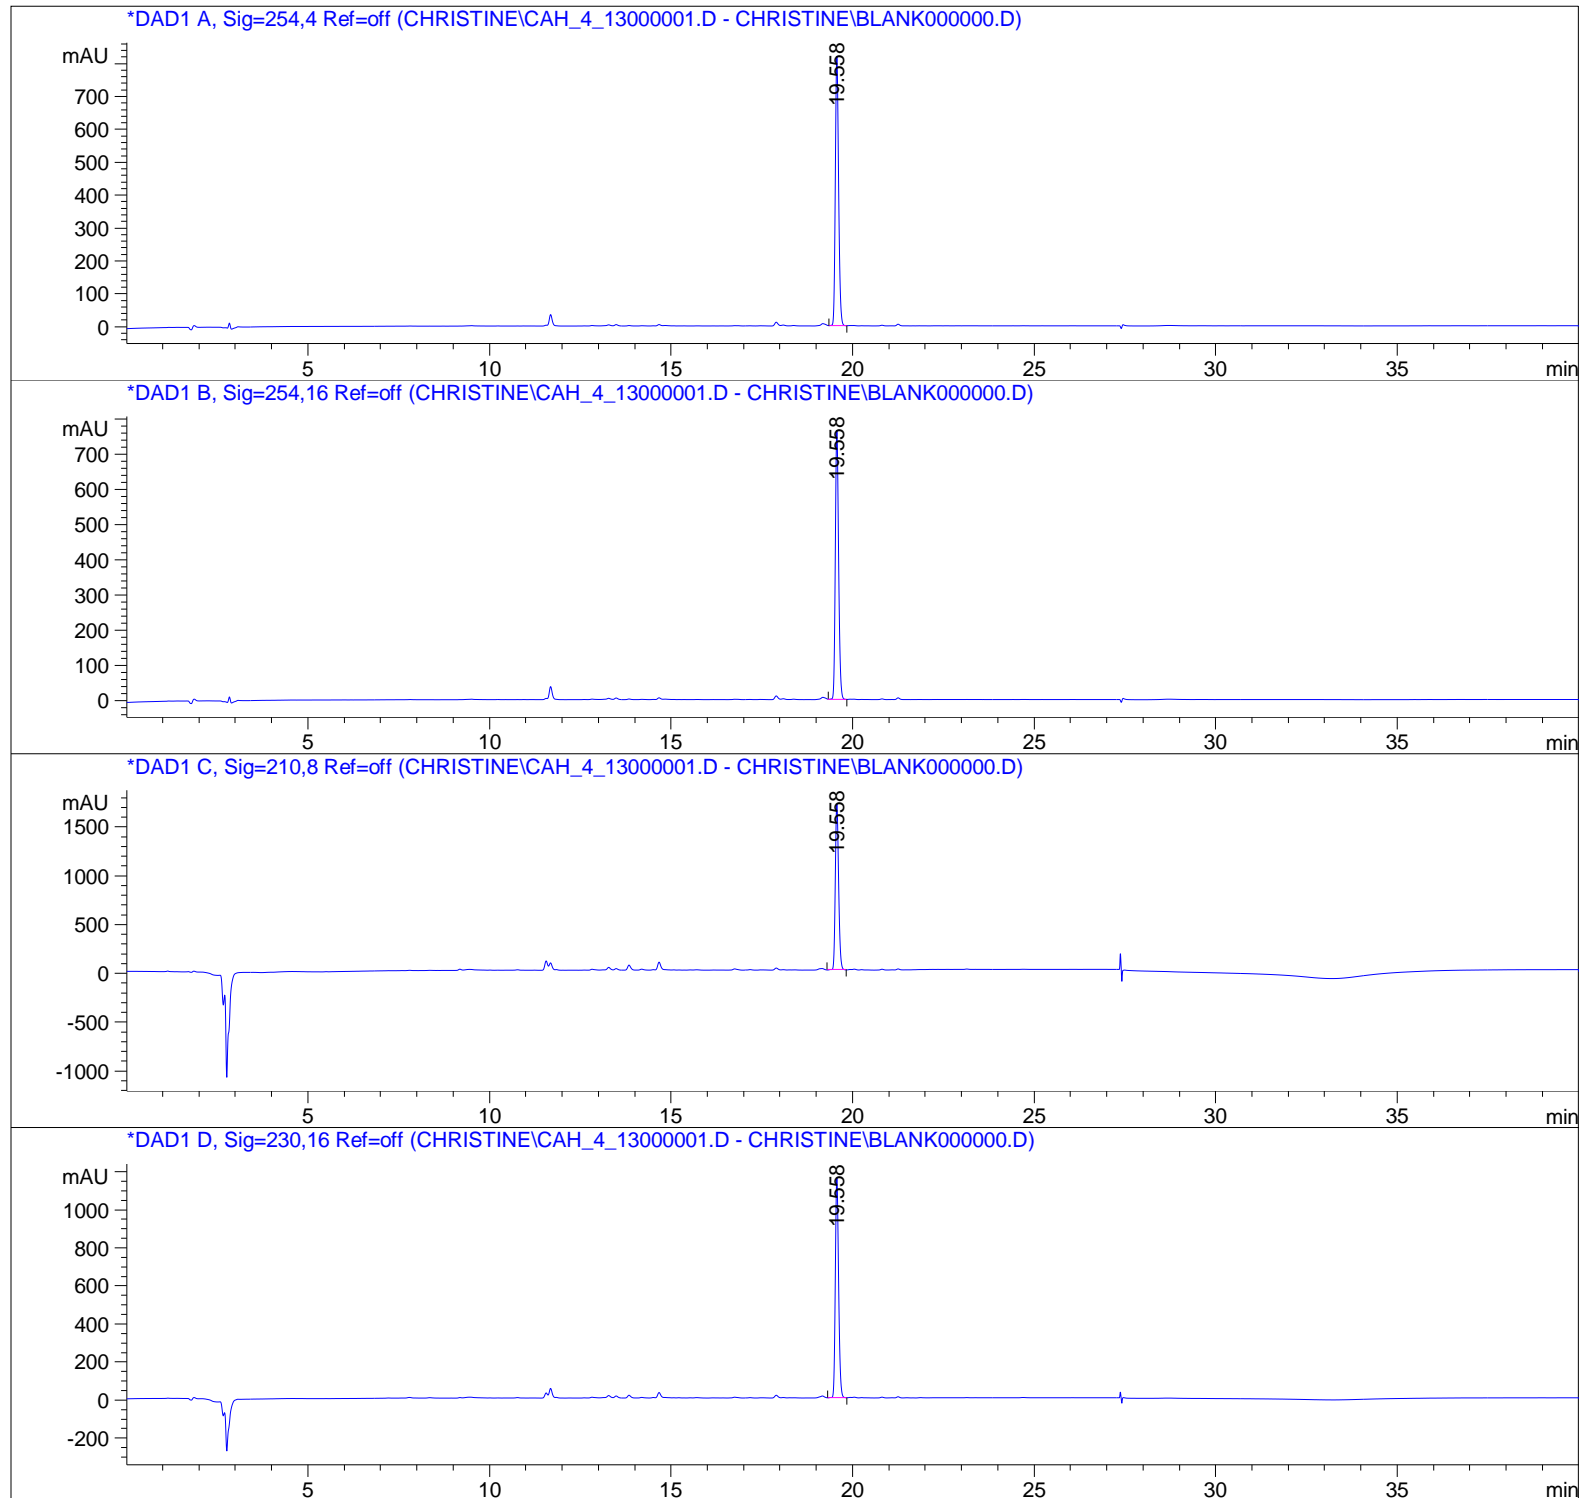**S57**

Sample Name: CAH\_4\_13

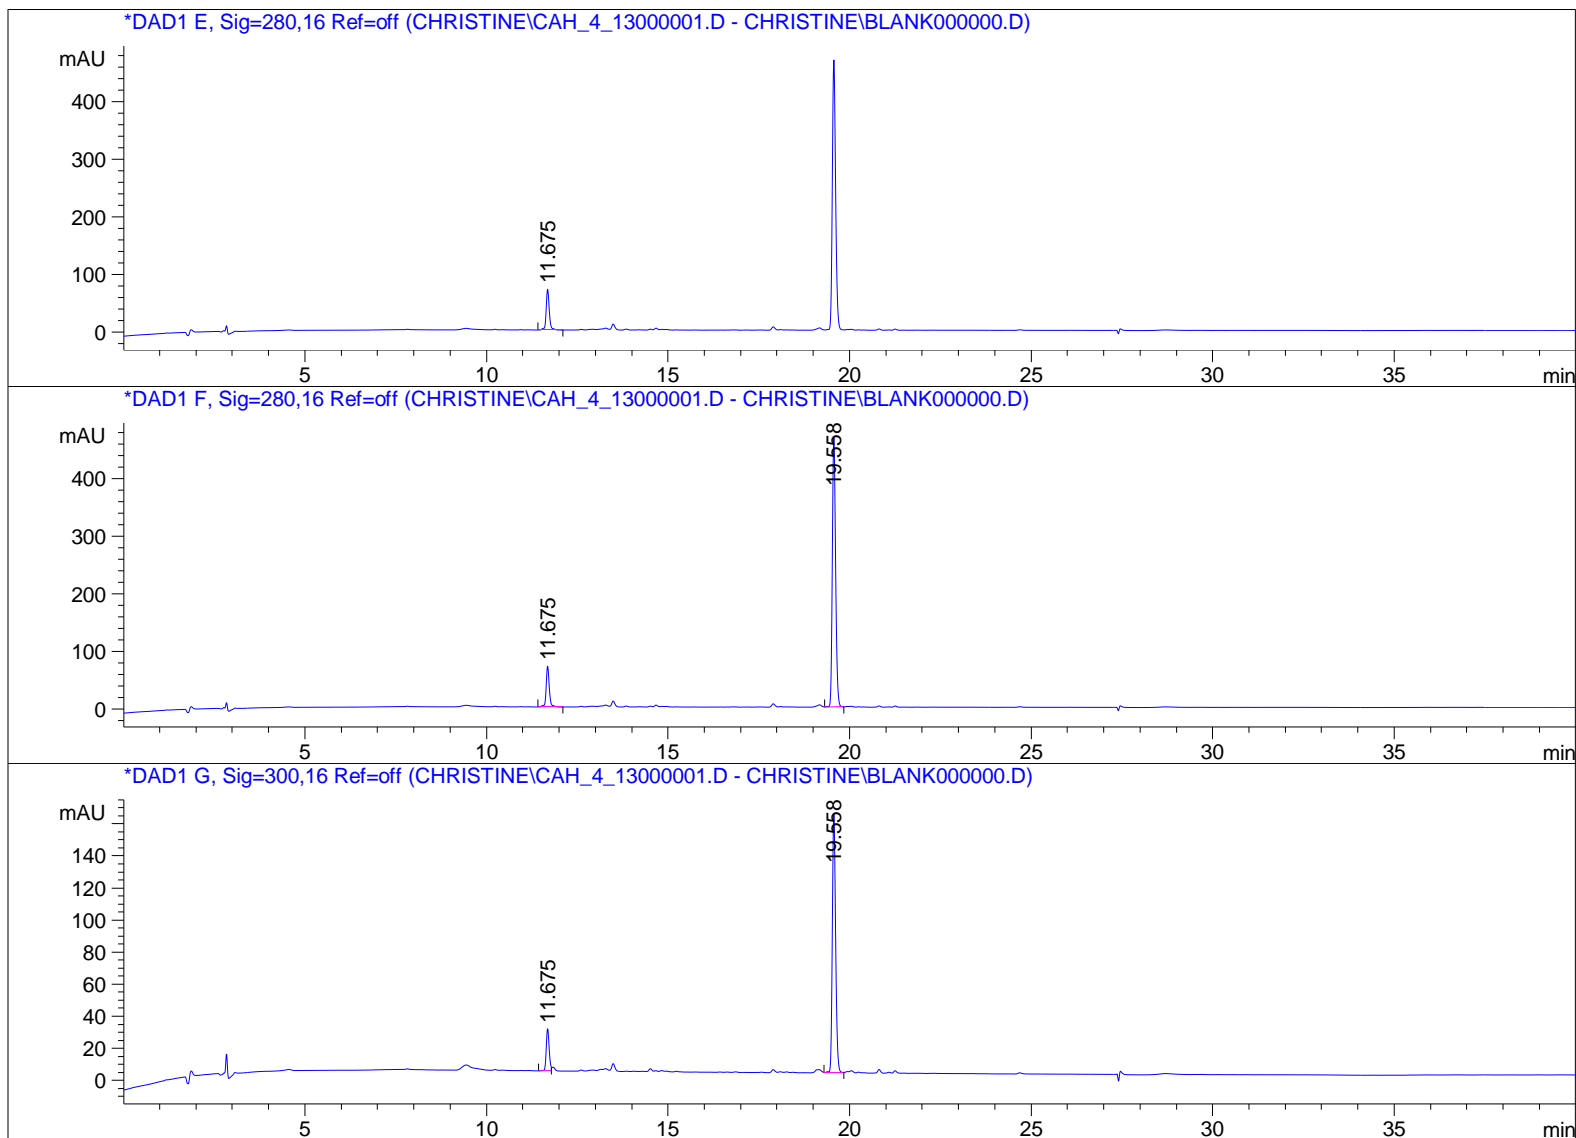

=====  
 Area Percent Report  
 =====

Sorted By : Signal  
 Multiplier : 1.0000  
 Dilution : 1.0000  
 Use Multiplier & Dilution Factor with ISTDs

Signal 1: DAD1 A, Sig=254,4 Ref=off  
 Signal has been modified after loading from rawdata file!

| Peak # | RetTime [min] | Type | Width [min] | Area [mAU*s] | Height [mAU] | Area %   |
|--------|---------------|------|-------------|--------------|--------------|----------|
| 1      | 19.558        | VV   | 0.0950      | 5127.37158   | 819.62360    | 100.0000 |

Totals : 5127.37158 819.62360

**S58**

Sample Name: CAH\_4\_13

Signal 2: DAD1 B, Sig=254,16 Ref=off

Signal has been modified after loading from rawdata file!

| Peak # | RetTime [min] | Type | Width [min] | Area [mAU*s] | Height [mAU] | Area %   |
|--------|---------------|------|-------------|--------------|--------------|----------|
| 1      | 19.558        | VV   | 0.0950      | 4792.61084   | 765.89771    | 100.0000 |

Totals : 4792.61084 765.89771

Signal 3: DAD1 C, Sig=210,8 Ref=off

Signal has been modified after loading from rawdata file!

| Peak # | RetTime [min] | Type | Width [min] | Area [mAU*s] | Height [mAU] | Area %   |
|--------|---------------|------|-------------|--------------|--------------|----------|
| 1      | 19.558        | VV   | 0.0978      | 1.07562e4    | 1701.31848   | 100.0000 |

Totals : 1.07562e4 1701.31848

Signal 4: DAD1 D, Sig=230,16 Ref=off

Signal has been modified after loading from rawdata file!

| Peak # | RetTime [min] | Type | Width [min] | Area [mAU*s] | Height [mAU] | Area %   |
|--------|---------------|------|-------------|--------------|--------------|----------|
| 1      | 19.558        | VV   | 0.0952      | 7260.10791   | 1157.33716   | 100.0000 |

Totals : 7260.10791 1157.33716

Signal 5: DAD1 E, Sig=280,16 Ref=off

Signal has been modified after loading from rawdata file!

| Peak # | RetTime [min] | Type | Width [min] | Area [mAU*s] | Height [mAU] | Area %   |
|--------|---------------|------|-------------|--------------|--------------|----------|
| 1      | 11.675        | BB   | 0.0895      | 420.21866    | 70.51888     | 100.0000 |

Totals : 420.21866 70.51888

**S59**

Sample Name: CAH\_4\_13

Signal 6: DAD1 F, Sig=280,16 Ref=off

Signal has been modified after loading from rawdata file!

| Peak # | RetTime [min] | Type | Width [min] | Area [mAU*s] | Height [mAU] | Area %  |
|--------|---------------|------|-------------|--------------|--------------|---------|
| 1      | 11.675        | BB   | 0.0895      | 420.21866    | 70.51888     | 12.5043 |
| 2      | 19.558        | VV   | 0.0950      | 2940.38770   | 469.76230    | 87.4957 |

Totals : 3360.60635 540.28118

Signal 7: DAD1 G, Sig=300,16 Ref=off

Signal has been modified after loading from rawdata file!

| Peak # | RetTime [min] | Type | Width [min] | Area [mAU*s] | Height [mAU] | Area %  |
|--------|---------------|------|-------------|--------------|--------------|---------|
| 1      | 11.675        | BV   | 0.0861      | 149.43964    | 26.37713     | 12.7927 |
| 2      | 19.558        | VV   | 0.0955      | 1018.72174   | 161.60686    | 87.2073 |

Totals : 1168.16138 187.98399

=====  
\*\*\* End of Report \*\*\***S60**

# HRMS for compound 30

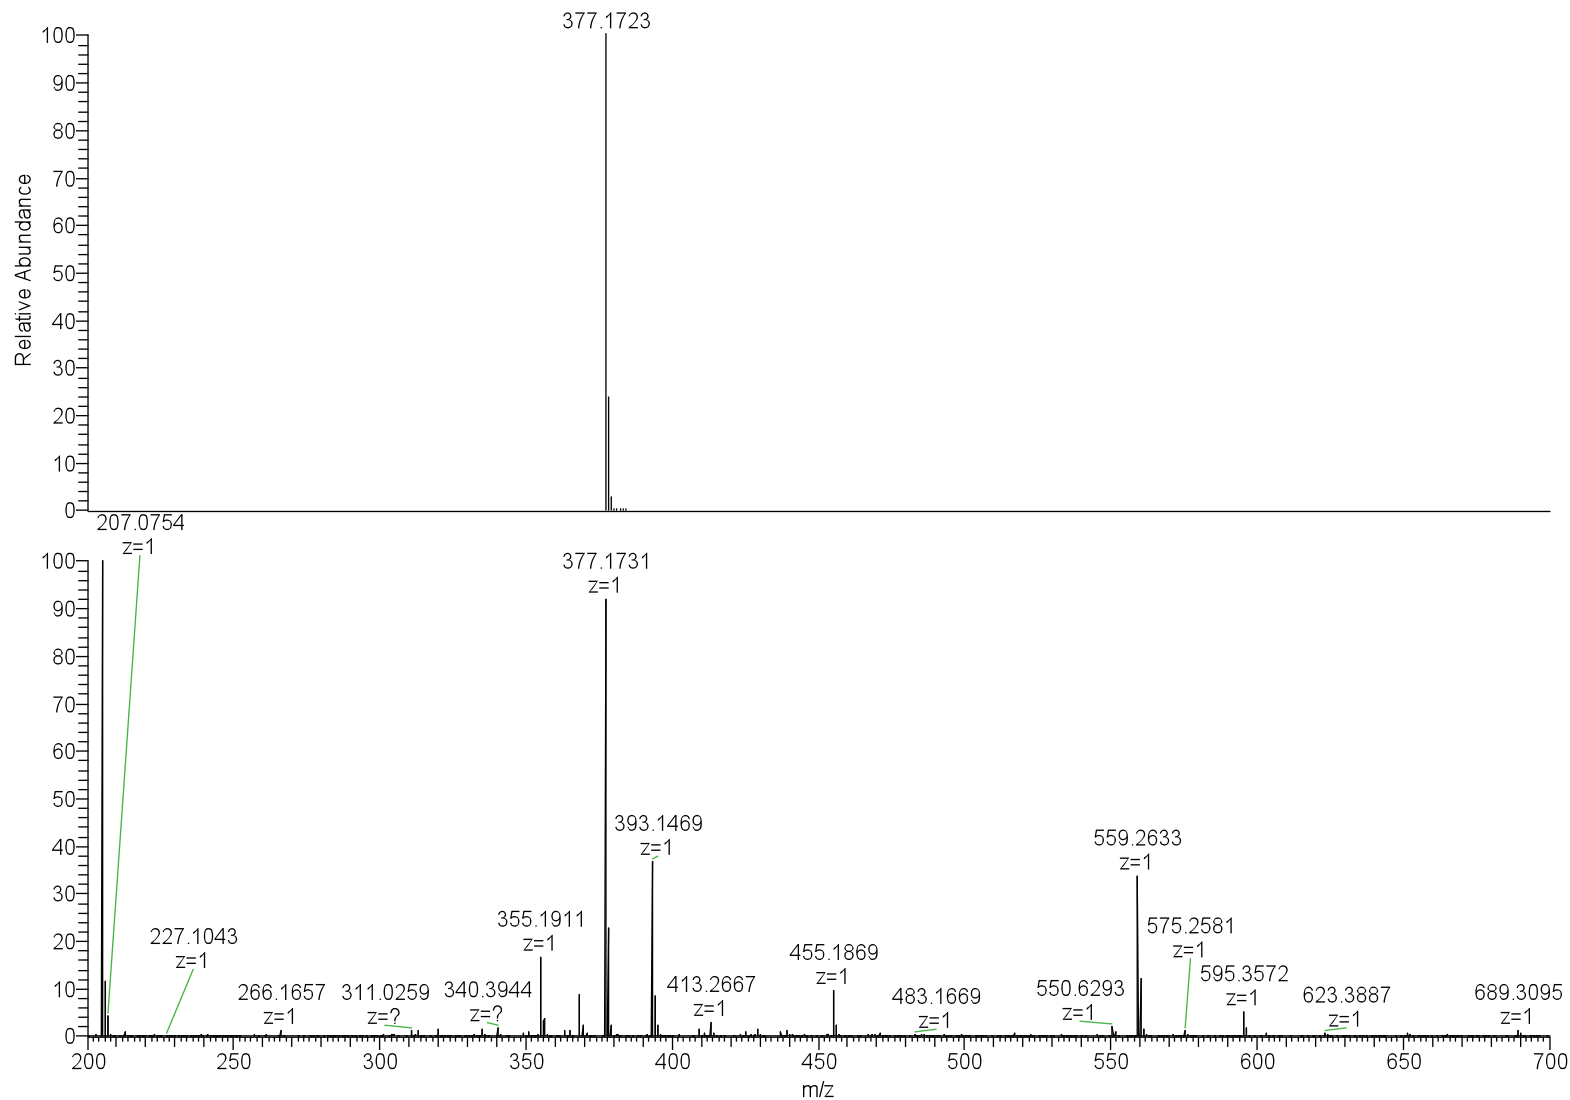

NL:  
7.79E5  
C<sub>22</sub>H<sub>26</sub>O<sub>4</sub>Na:  
C<sub>22</sub>H<sub>26</sub>O<sub>4</sub>Na<sub>1</sub>  
pa Chrg 1

NL:  
1.45E8  
CAH\_4\_18\_Orbi\_+  
ESI#1 RT: 0.00  
AV: 1 T: FTMS + p  
ESI Full ms  
[200.00-700.00]

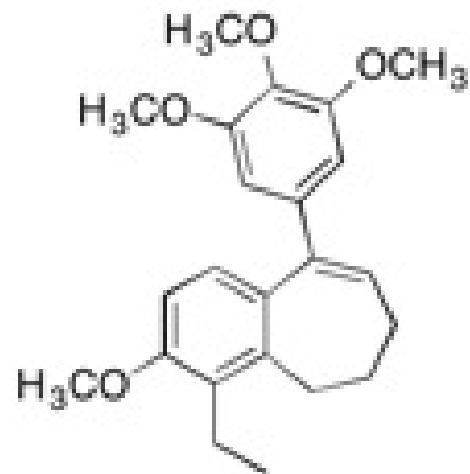

**31**

6.860  
6.843  
6.705  
6.688  
6.522  
6.336  
6.321  
6.307

3.863  
3.831  
3.805

2.808  
2.793  
2.778  
2.763  
2.704  
2.691  
2.677  
2.164  
2.150  
2.136  
2.122  
2.108  
2.092  
1.942  
1.928  
1.914  
1.899

1.198  
1.183  
1.168

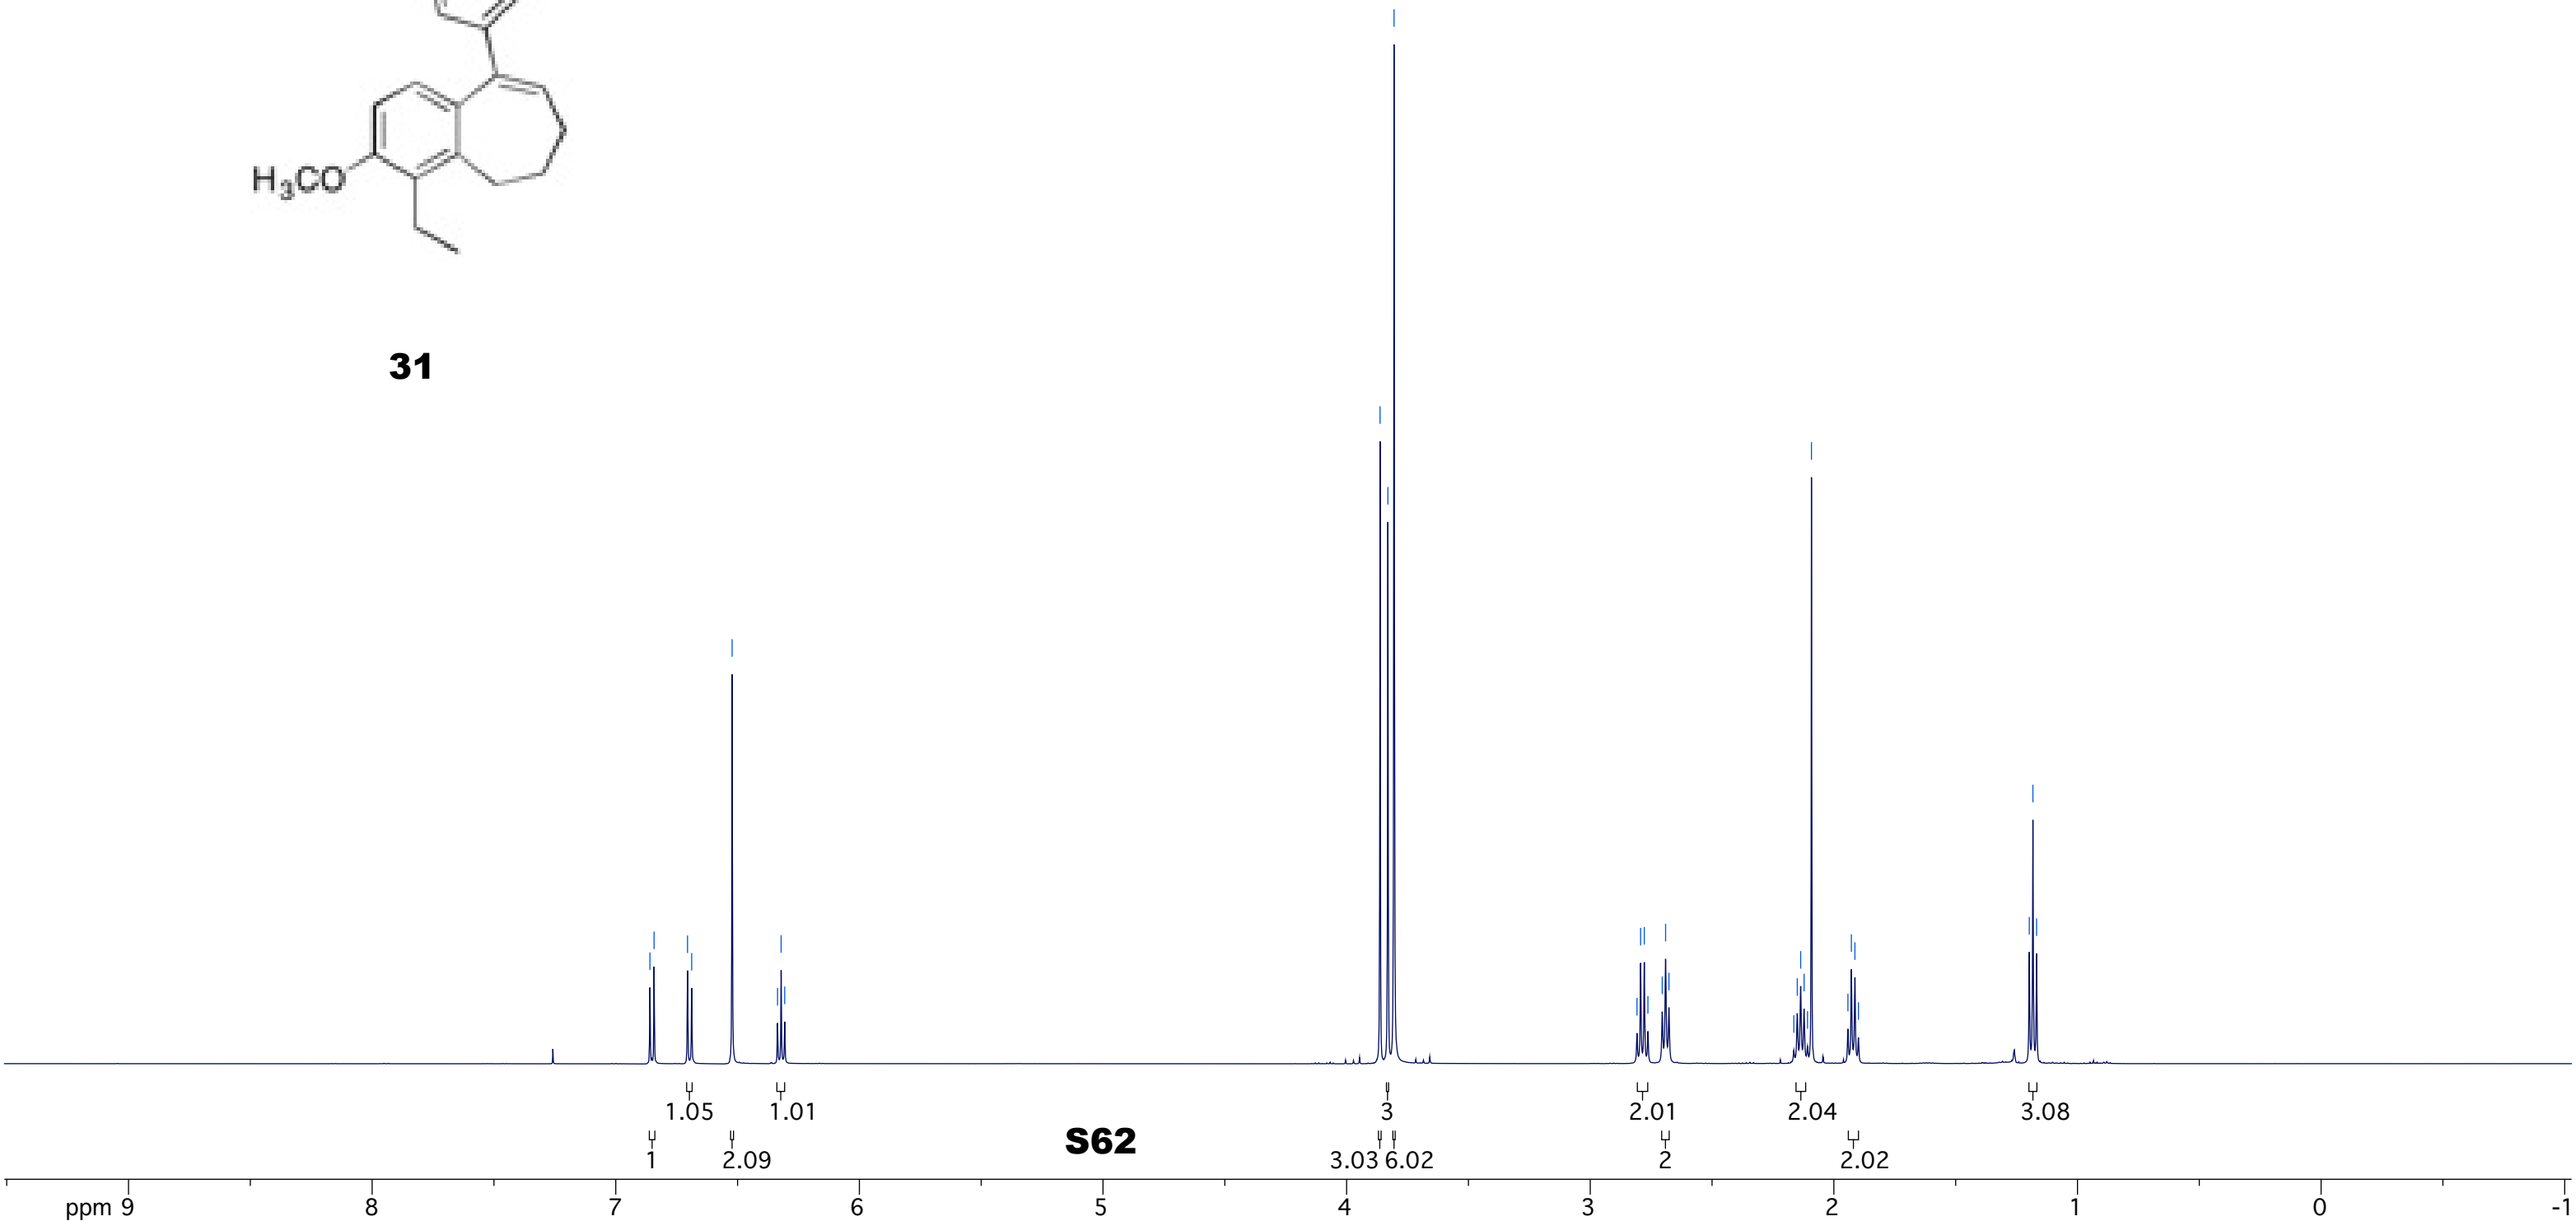

**S62**

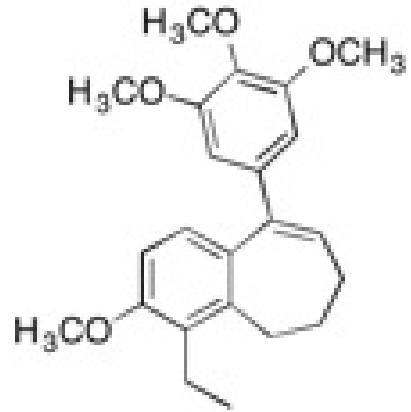

**31**

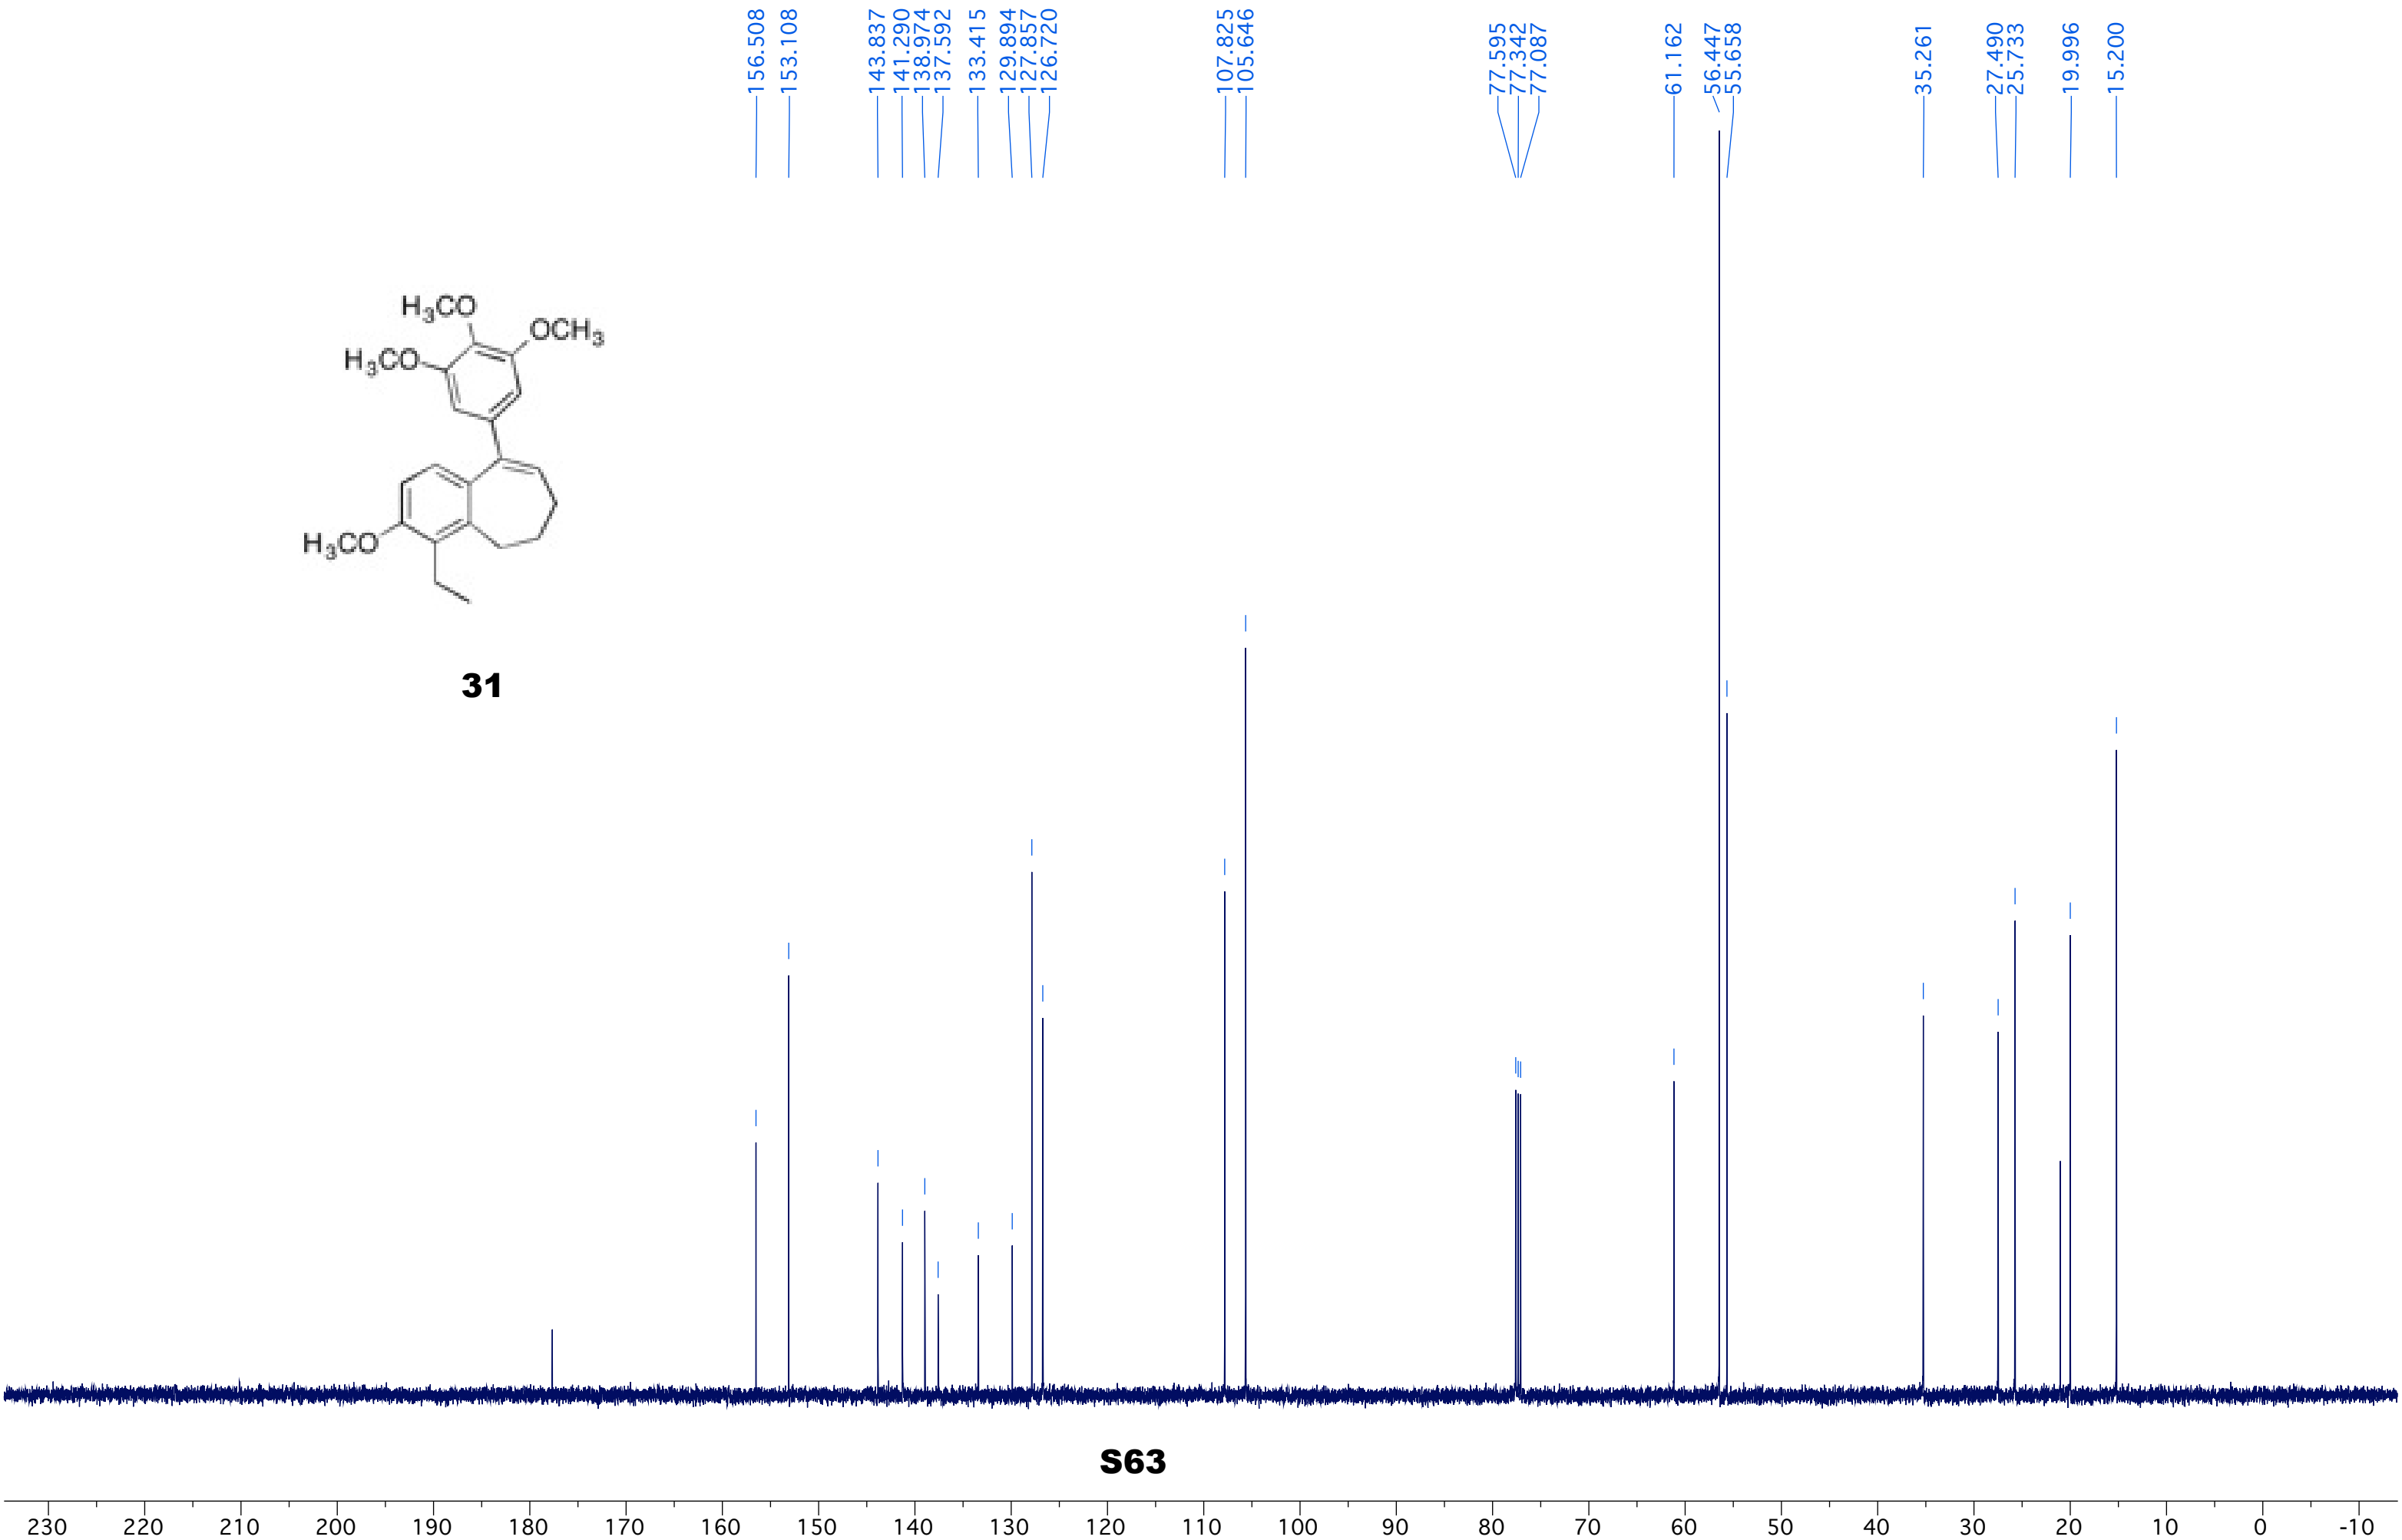

# HPLC for compound 31

=====  
Acq. Operator : Christine  
Acq. Instrument : Instrument 1 Location : -  
Injection Date : 2/25/2014 1:47:25 PM  
Acq. Method : C:\CHEM32\1\METHODS\MASTERMETHOD.M  
Last changed : 2/25/2014 1:25:25 PM by Christine  
Analysis Method : C:\CHEM32\1\DATA\CHRISTINE\CAH\_4\_21000000.D\DA.M (MASTERMETHOD.M)  
Last changed : 2/25/2014 2:37:40 PM by Christine

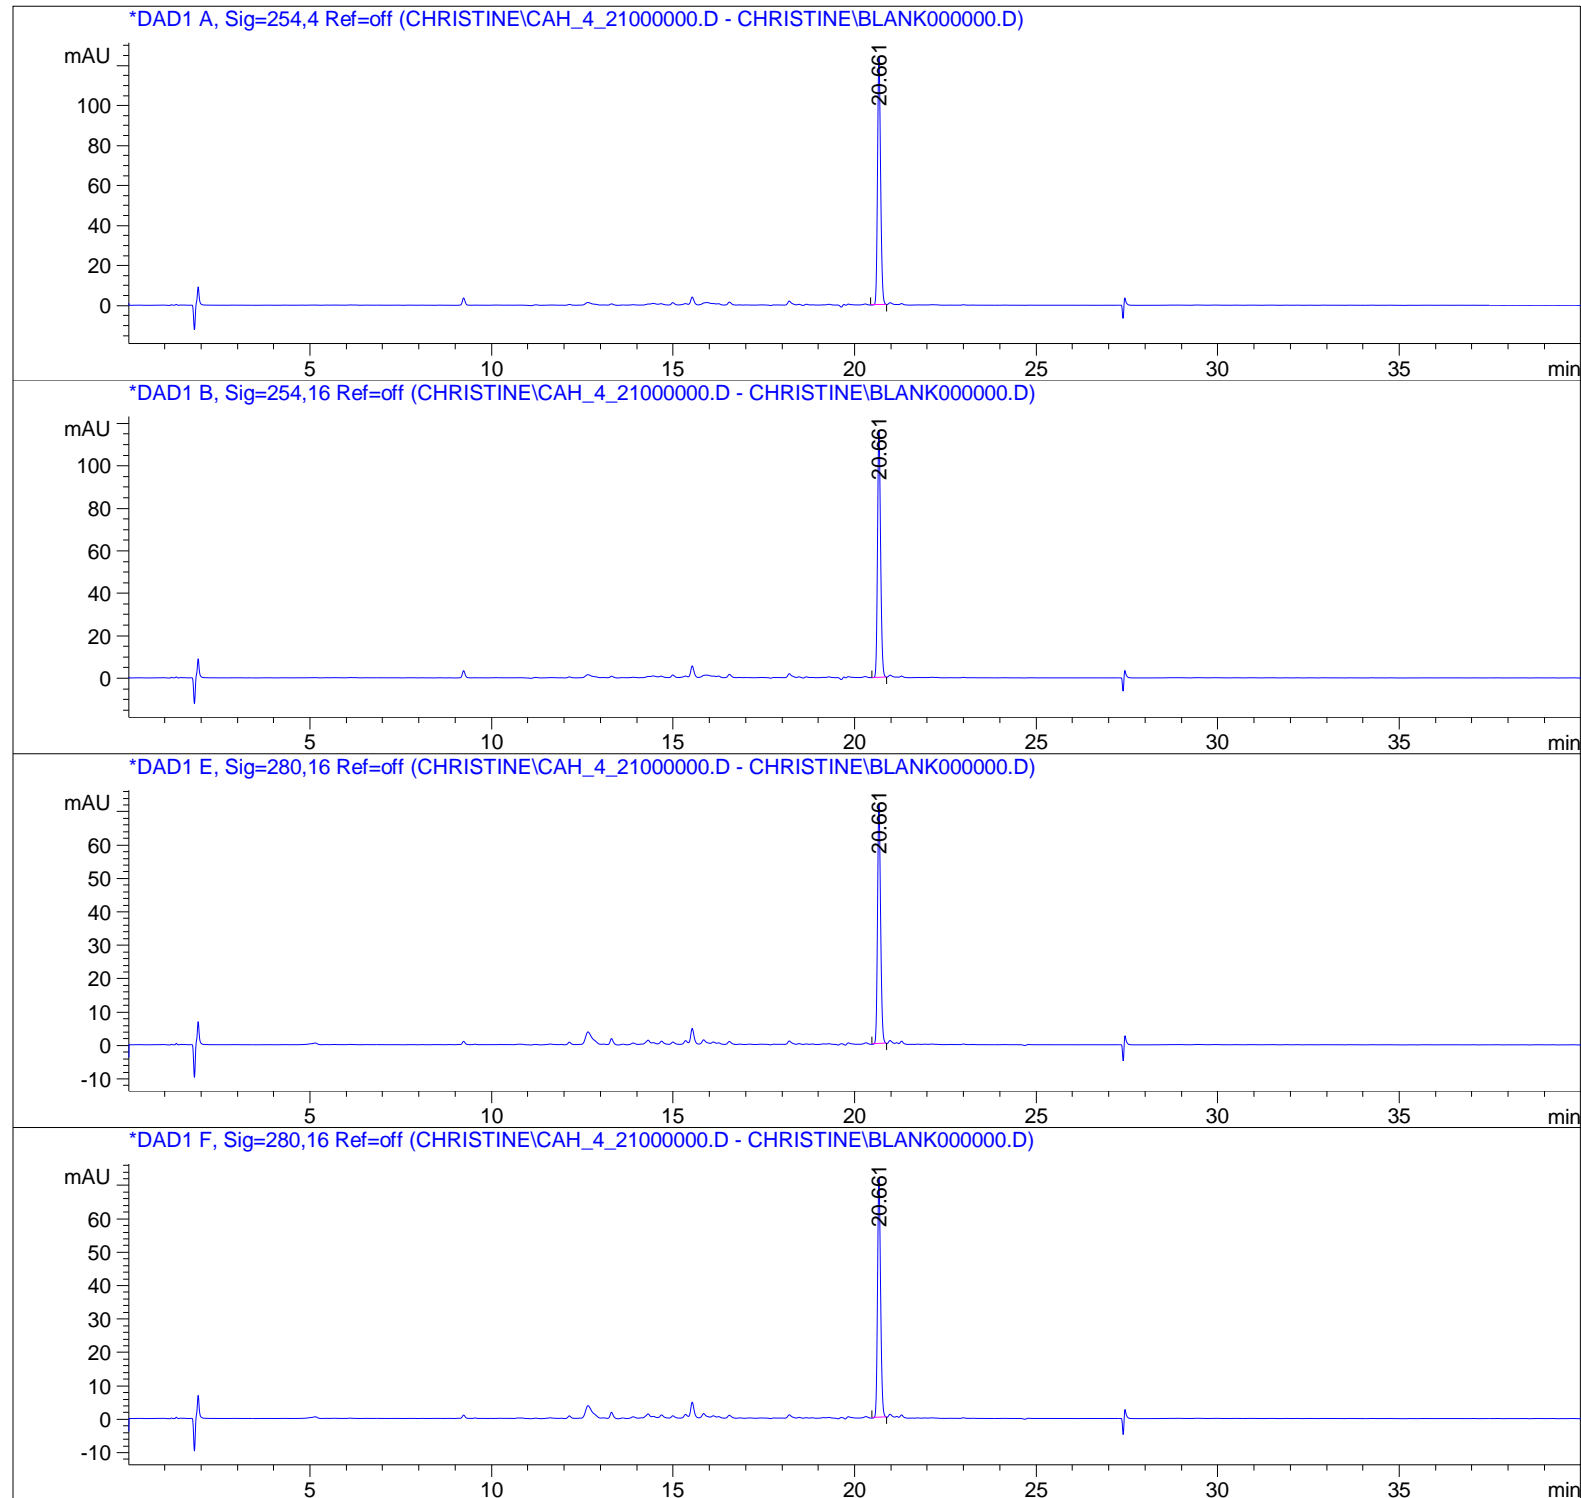**S64**



Sample Name: CAH\_4\_21

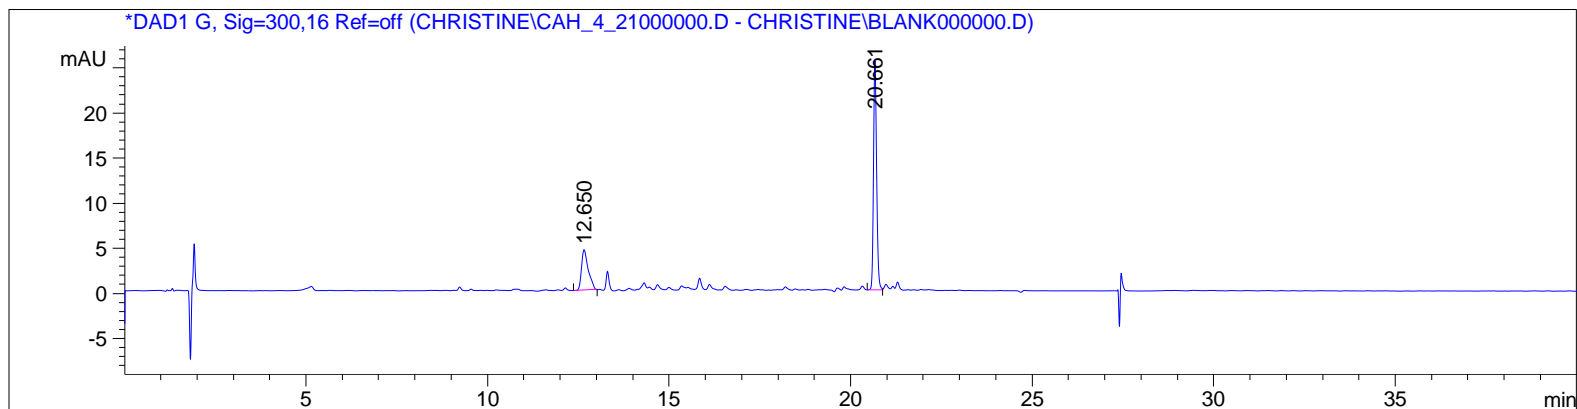

```
=====
                          Area Percent Report
=====
```

```
Sorted By           :      Signal
Multiplier          :      1.0000
Dilution            :      1.0000
Use Multiplier & Dilution Factor with ISTDs
```

Signal 1: DAD1 A, Sig=254,4 Ref=off

Signal has been modified after loading from rawdata file!

| Peak # | RetTime [min] | Type | Width [min] | Area [mAU*s] | Height [mAU] | Area %   |
|--------|---------------|------|-------------|--------------|--------------|----------|
| 1      | 20.661        | BV   | 0.0908      | 733.27759    | 124.40224    | 100.0000 |

```
Totals :                733.27759  124.40224
```

Signal 2: DAD1 B, Sig=254,16 Ref=off

Signal has been modified after loading from rawdata file!

| Peak # | RetTime [min] | Type | Width [min] | Area [mAU*s] | Height [mAU] | Area %   |
|--------|---------------|------|-------------|--------------|--------------|----------|
| 1      | 20.661        | BV   | 0.0906      | 685.97784    | 116.60737    | 100.0000 |

```
Totals :                685.97784  116.60737
```

Signal 3: DAD1 E, Sig=280,16 Ref=off

Signal has been modified after loading from rawdata file!

**S65**

Sample Name: CAH\_4\_21

| Peak # | RetTime [min] | Type | Width [min] | Area [mAU*s] | Height [mAU] | Area %   |
|--------|---------------|------|-------------|--------------|--------------|----------|
| 1      | 20.661        | BV   | 0.0908      | 424.10693    | 71.94486     | 100.0000 |

Totals :                                   424.10693   71.94486

Signal 4: DAD1 F, Sig=280,16 Ref=off

Signal has been modified after loading from rawdata file!

| Peak # | RetTime [min] | Type | Width [min] | Area [mAU*s] | Height [mAU] | Area %   |
|--------|---------------|------|-------------|--------------|--------------|----------|
| 1      | 20.661        | BV   | 0.0908      | 424.10693    | 71.94486     | 100.0000 |

Totals :                                   424.10693   71.94486

Signal 5: DAD1 G, Sig=300,16 Ref=off

Signal has been modified after loading from rawdata file!

| Peak # | RetTime [min] | Type | Width [min] | Area [mAU*s] | Height [mAU] | Area %  |
|--------|---------------|------|-------------|--------------|--------------|---------|
| 1      | 12.650        | BB   | 0.1914      | 58.18542     | 4.48376      | 27.7229 |
| 2      | 20.661        | BV   | 0.0916      | 151.69656    | 25.41301     | 72.2771 |

Totals :                                   209.88199   29.89677

=====  
\*\*\* End of Report \*\*\*

**S66**

# HRMS for compound 31

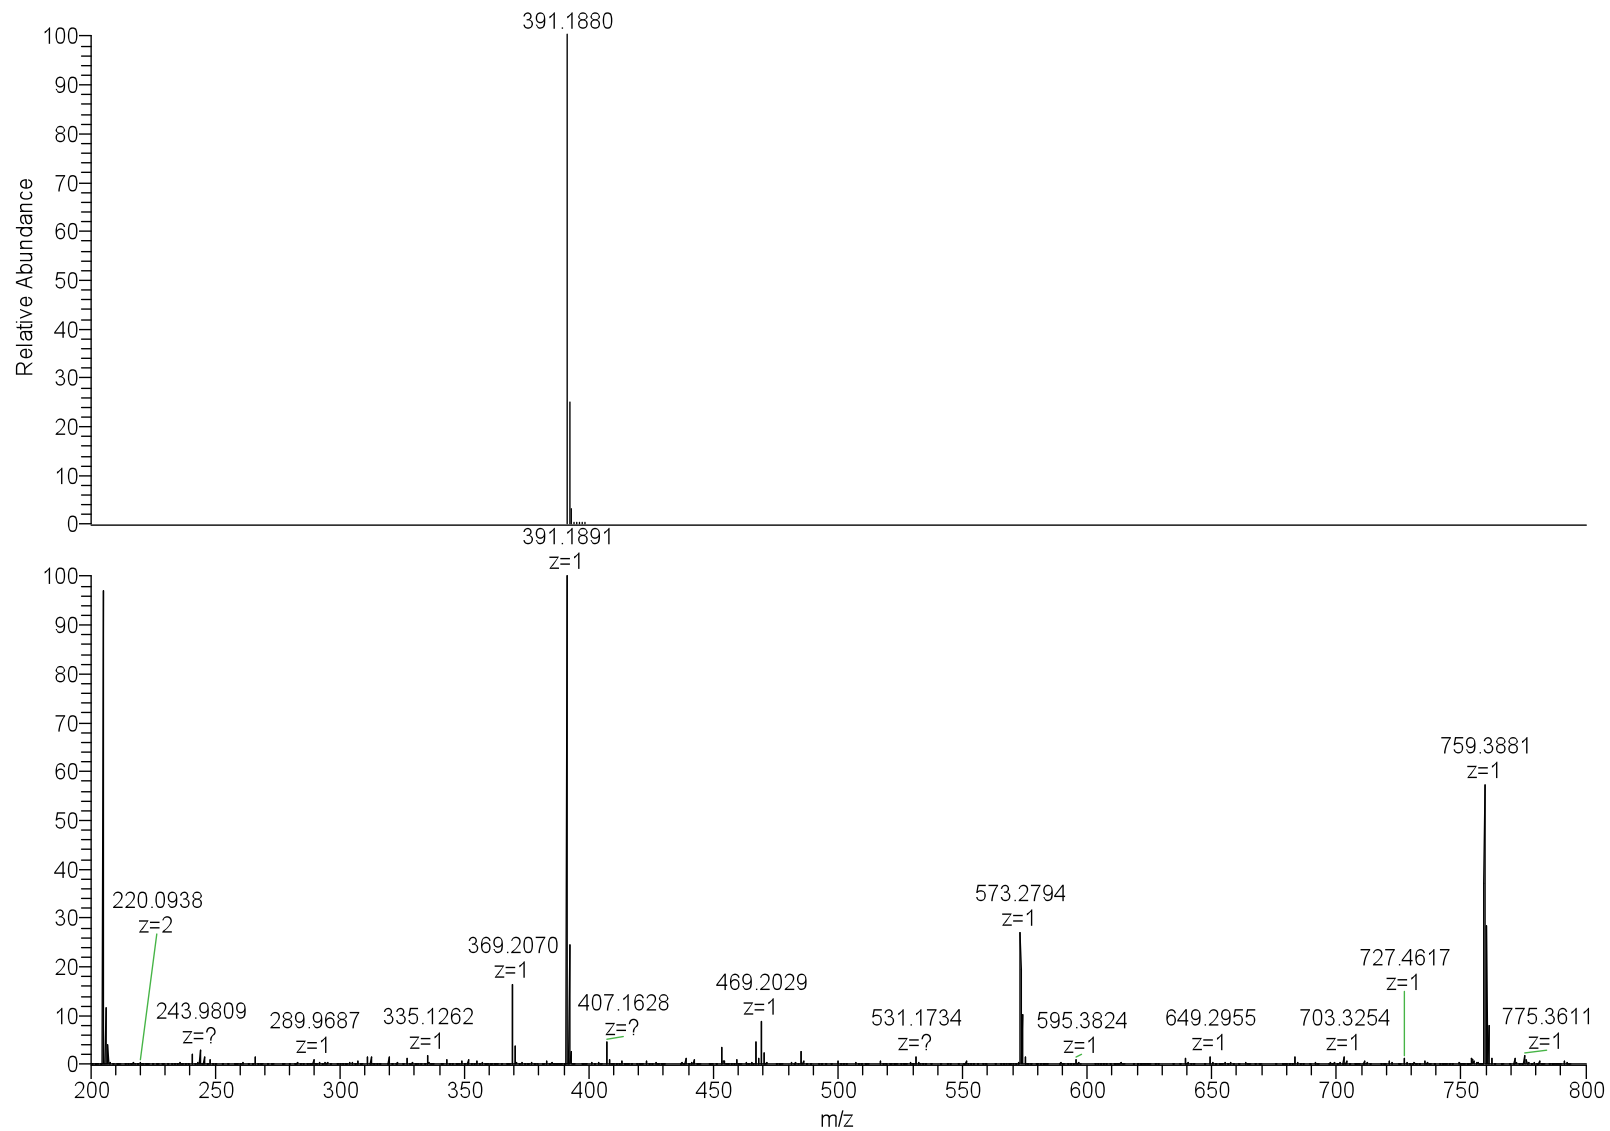

NL:  
7.71E5  
C<sub>23</sub>H<sub>28</sub>O<sub>4</sub>Na:  
C<sub>23</sub>H<sub>28</sub>O<sub>4</sub>Na<sub>1</sub>  
pa Chrg 1

NL:  
1.36E8  
CAH\_4\_21\_140304  
134739#1 RT: 0.01  
AV: 1 T: FTMS + p  
ESI Full ms  
[200.00-800.00]

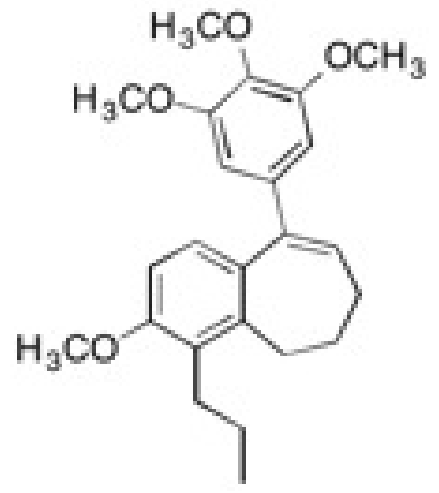

**32**

6.871  
6.854  
6.717  
6.700  
6.529  
6.348  
6.333  
6.318

3.876  
3.838  
3.820

2.754  
2.743  
2.738  
2.733  
2.722  
2.710  
2.696  
2.683  
2.174  
2.160  
2.146  
2.132  
2.118  
1.955  
1.941  
1.926  
1.912  
1.634  
1.620  
1.605  
1.589  
1.573  
1.559  
1.055  
1.040  
1.025

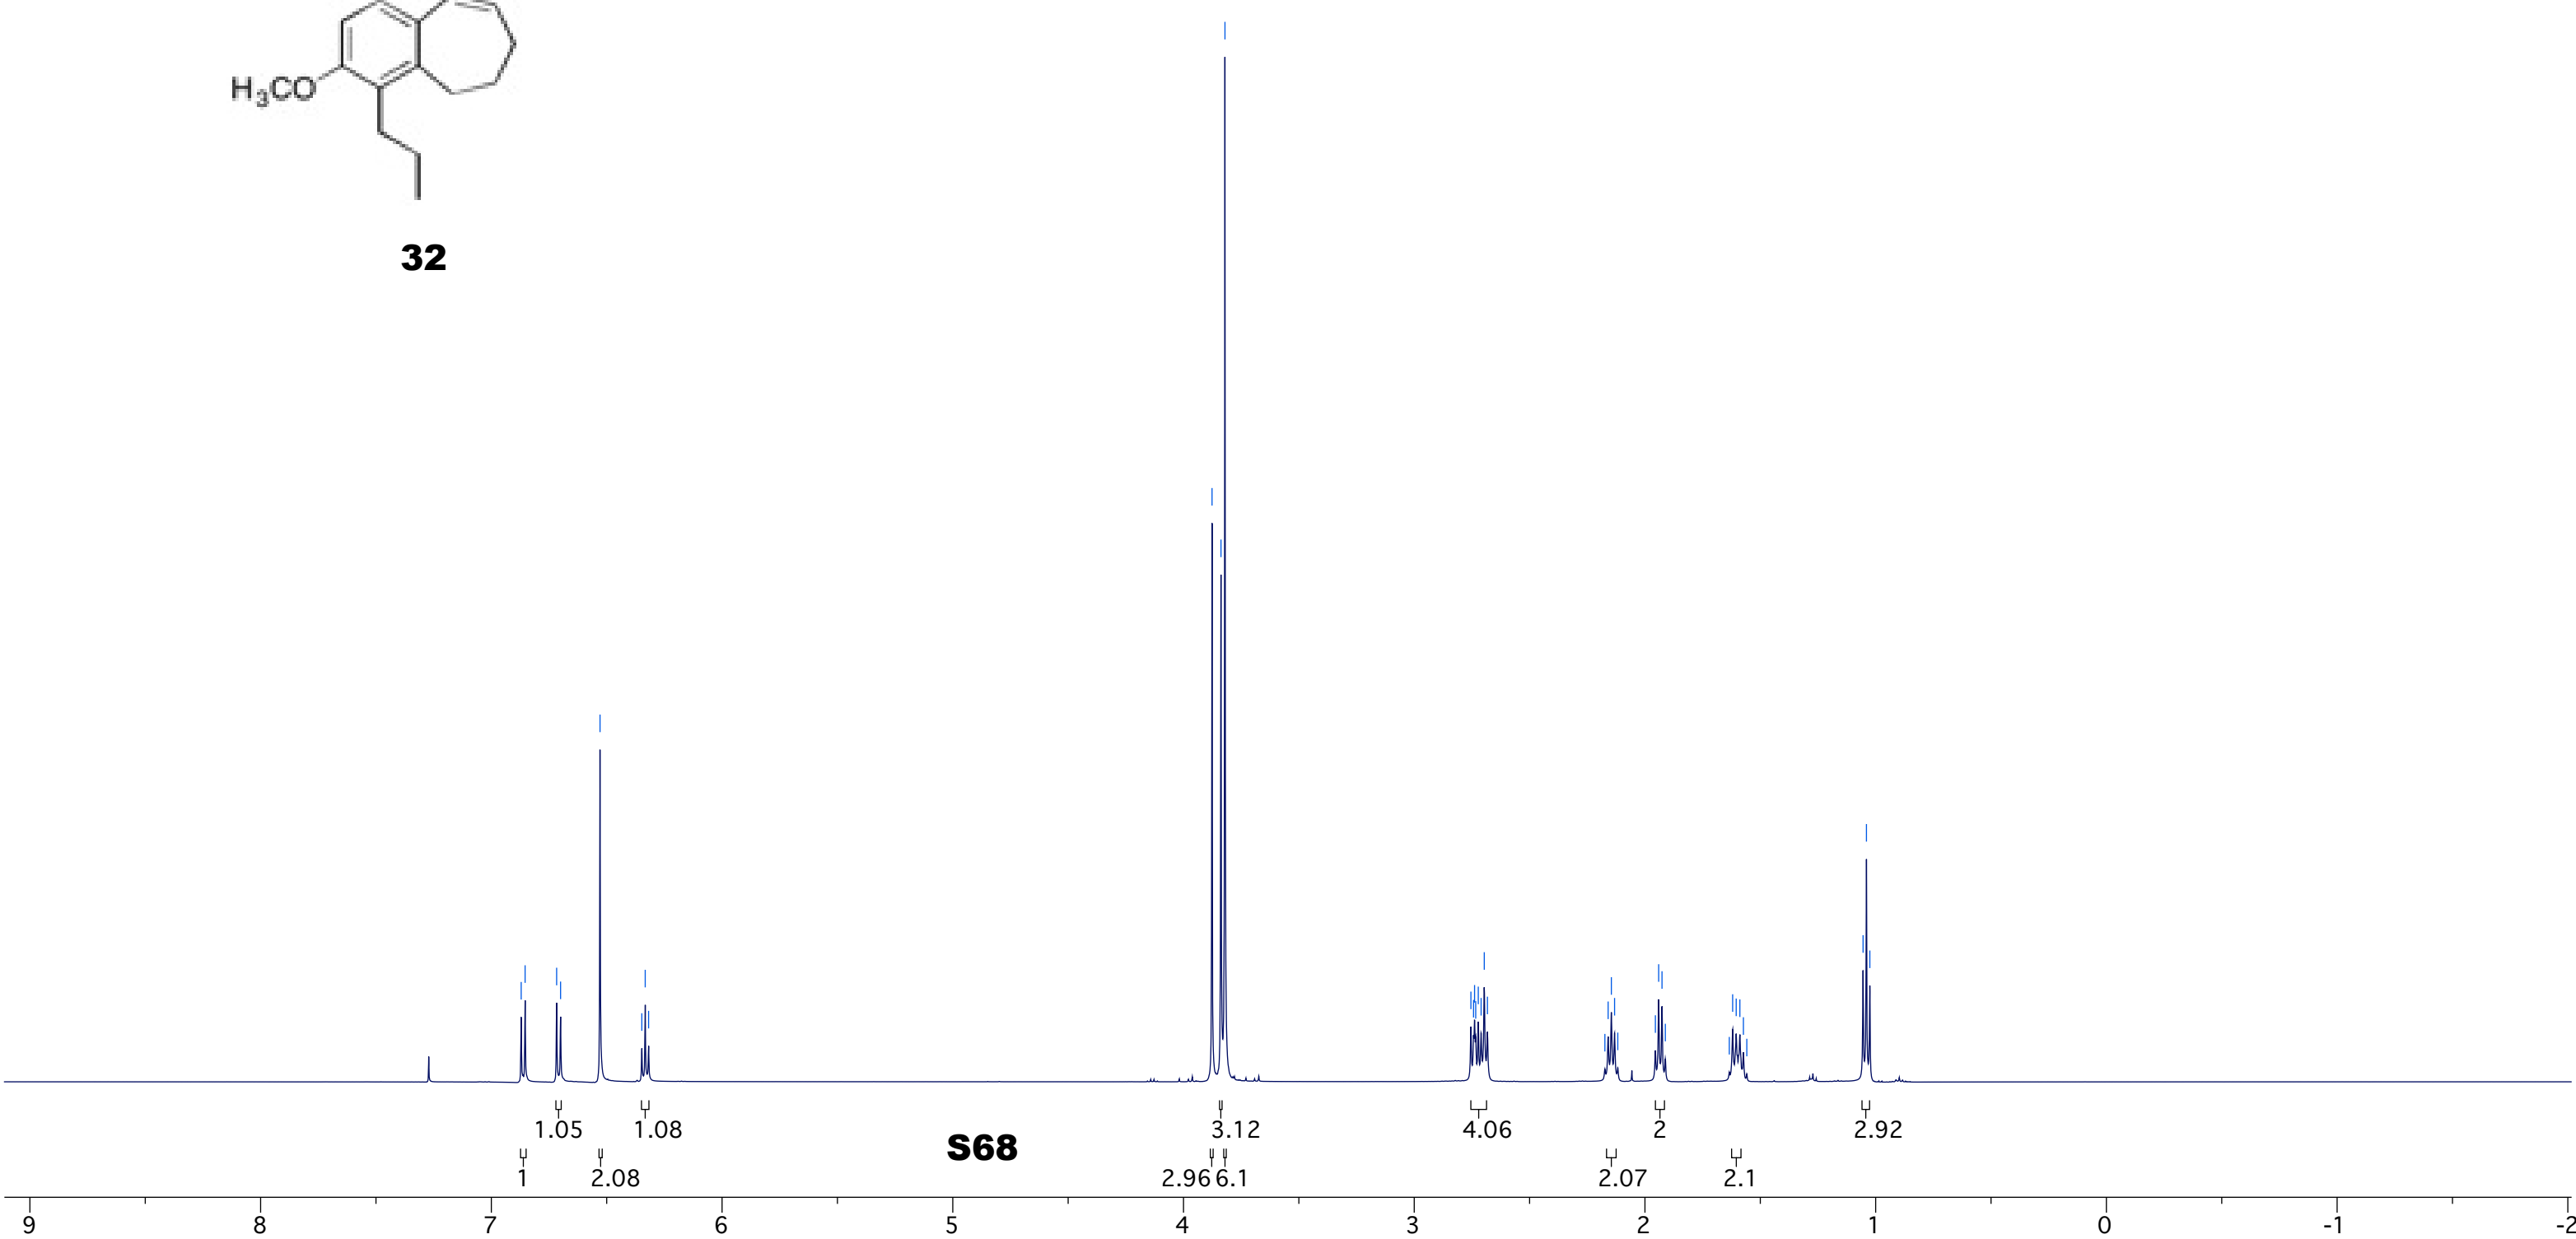

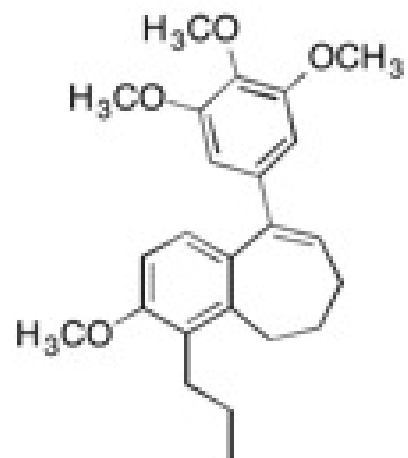

**32**

156.444  
152.831  
143.537  
141.269  
138.697  
137.309  
133.069  
128.256  
127.596  
126.430  
107.481  
105.325  
77.280  
77.025  
76.771  
60.899  
56.172  
55.367  
34.951  
28.608  
27.330  
25.455  
23.772  
14.545

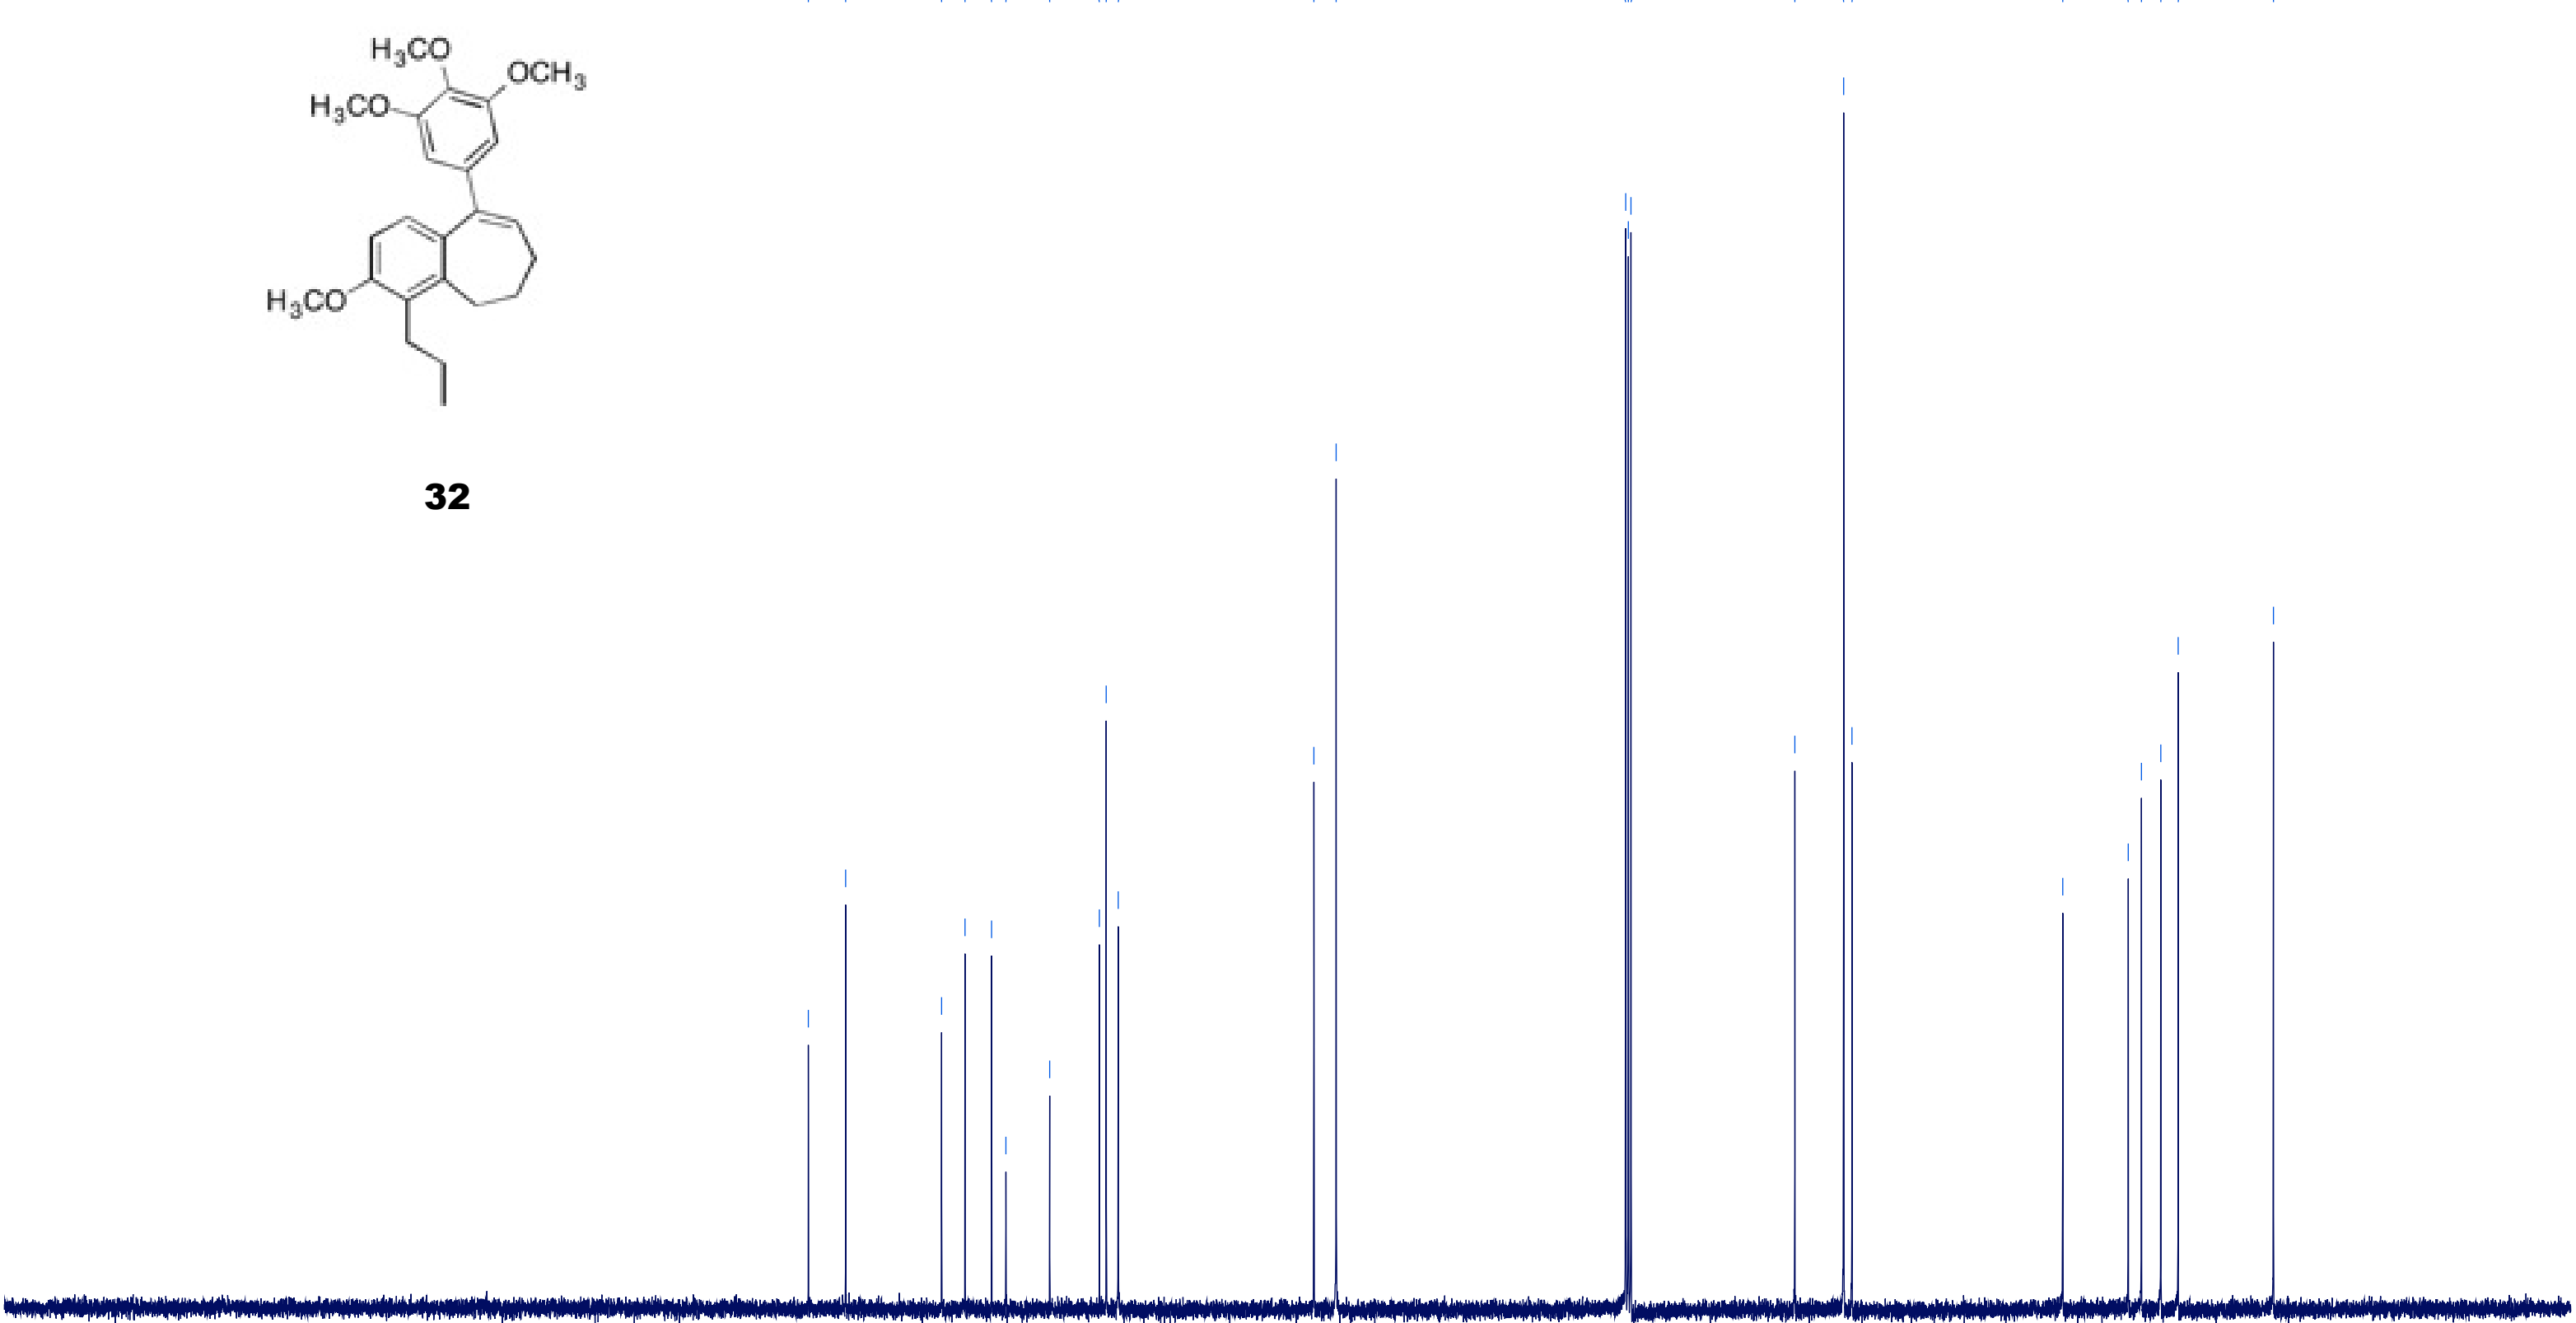

**S69**

230 220 210 200 190 180 170 160 150 140 130 120 110 100 90 80 70 60 50 40 30 20 10 0 -10

**HPLC for compound 32**

=====  
Acq. Operator : Christine  
Acq. Instrument : Instrument 1 Location : -  
Injection Date : 5/19/2014 3:07:57 PM  
Acq. Method : C:\CHEM32\1\METHODS\MASTERMETHOD.M  
Last changed : 5/19/2014 3:05:49 PM by Christine  
Analysis Method : C:\CHEM32\1\DATA\CHRISTINE\CAH\_4\_29000003.D\DA.M (MASTERMETHOD.M)  
Last changed : 5/19/2014 4:47:24 PM by Christine

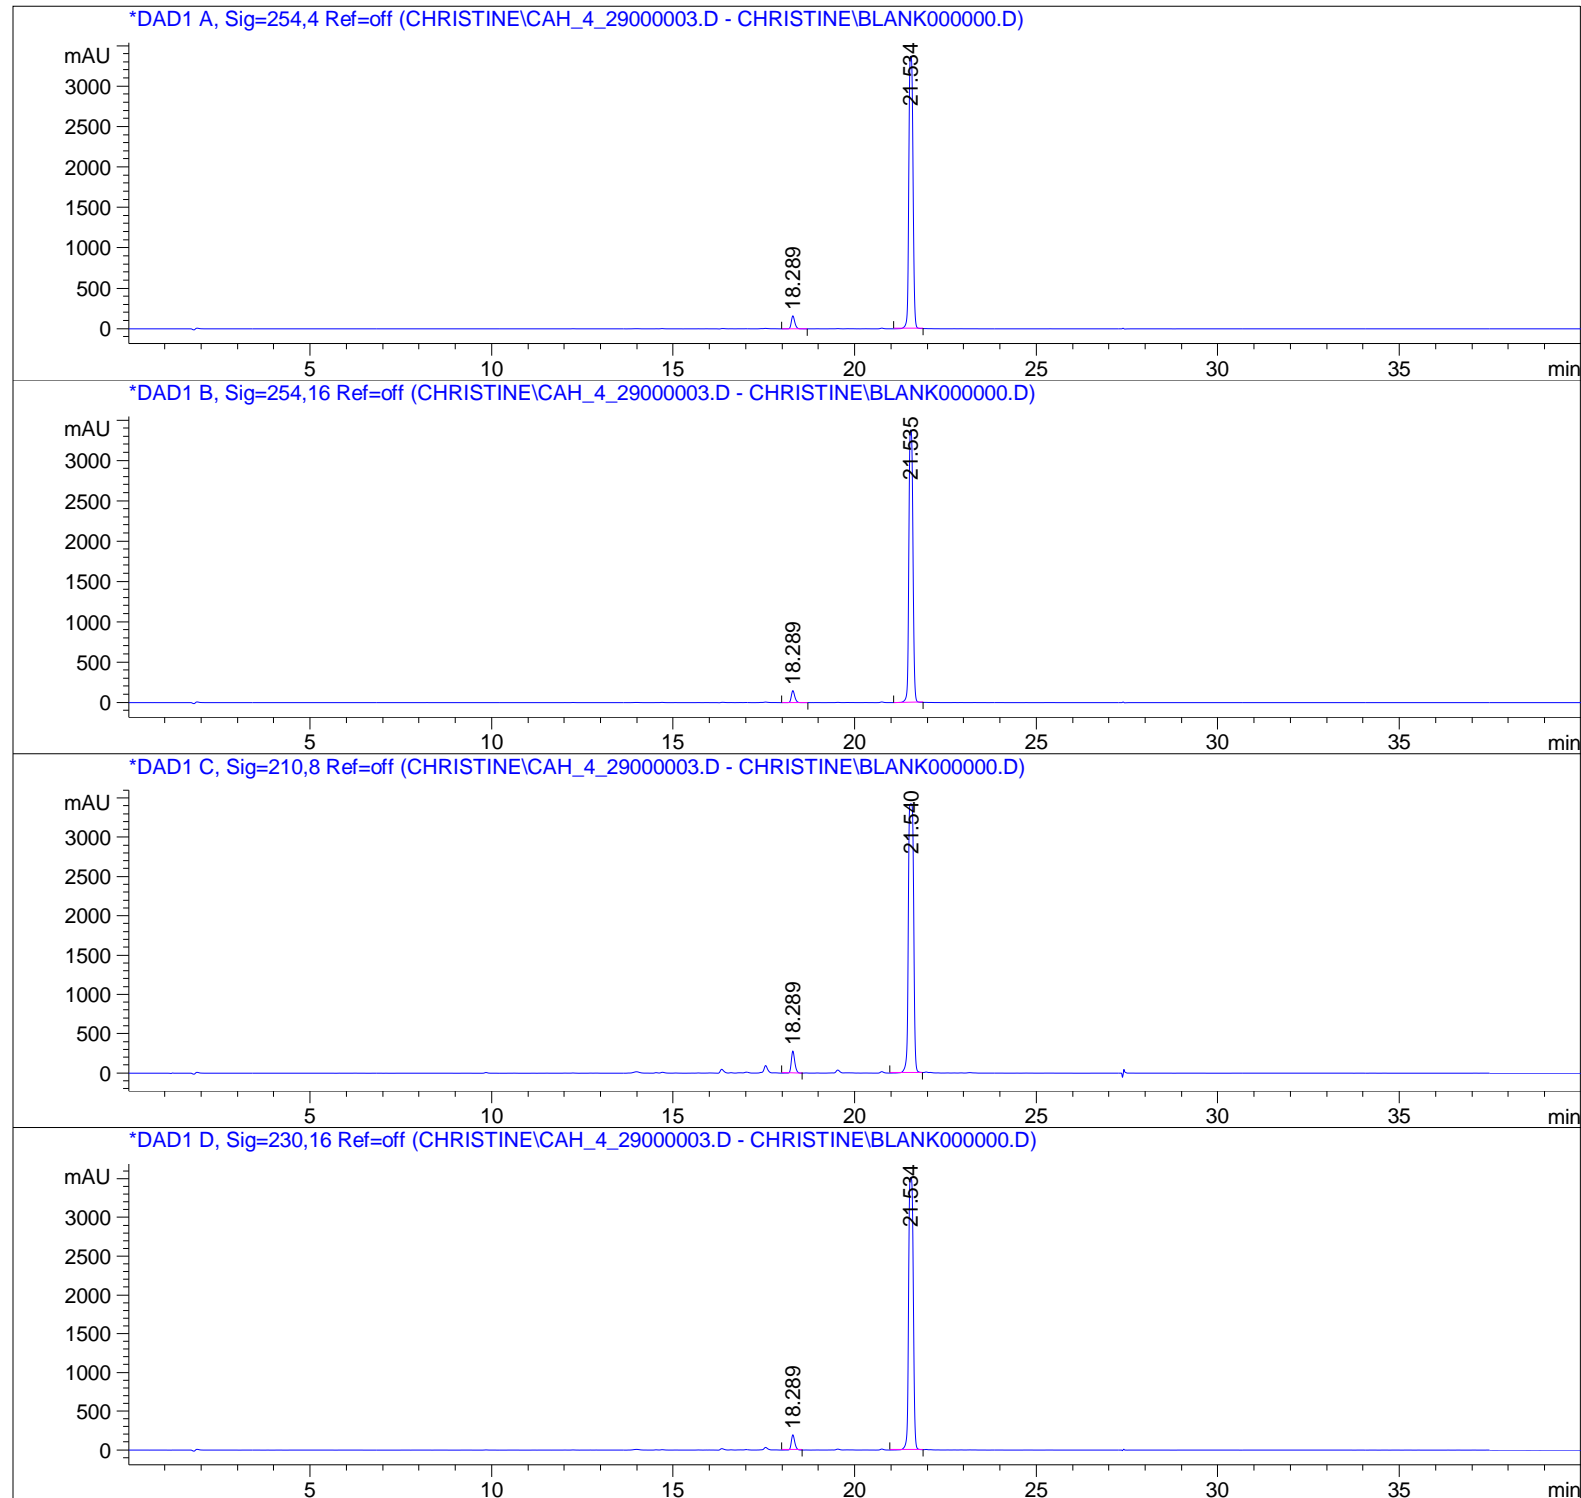**S70**

Sample Name: CAH\_4\_29

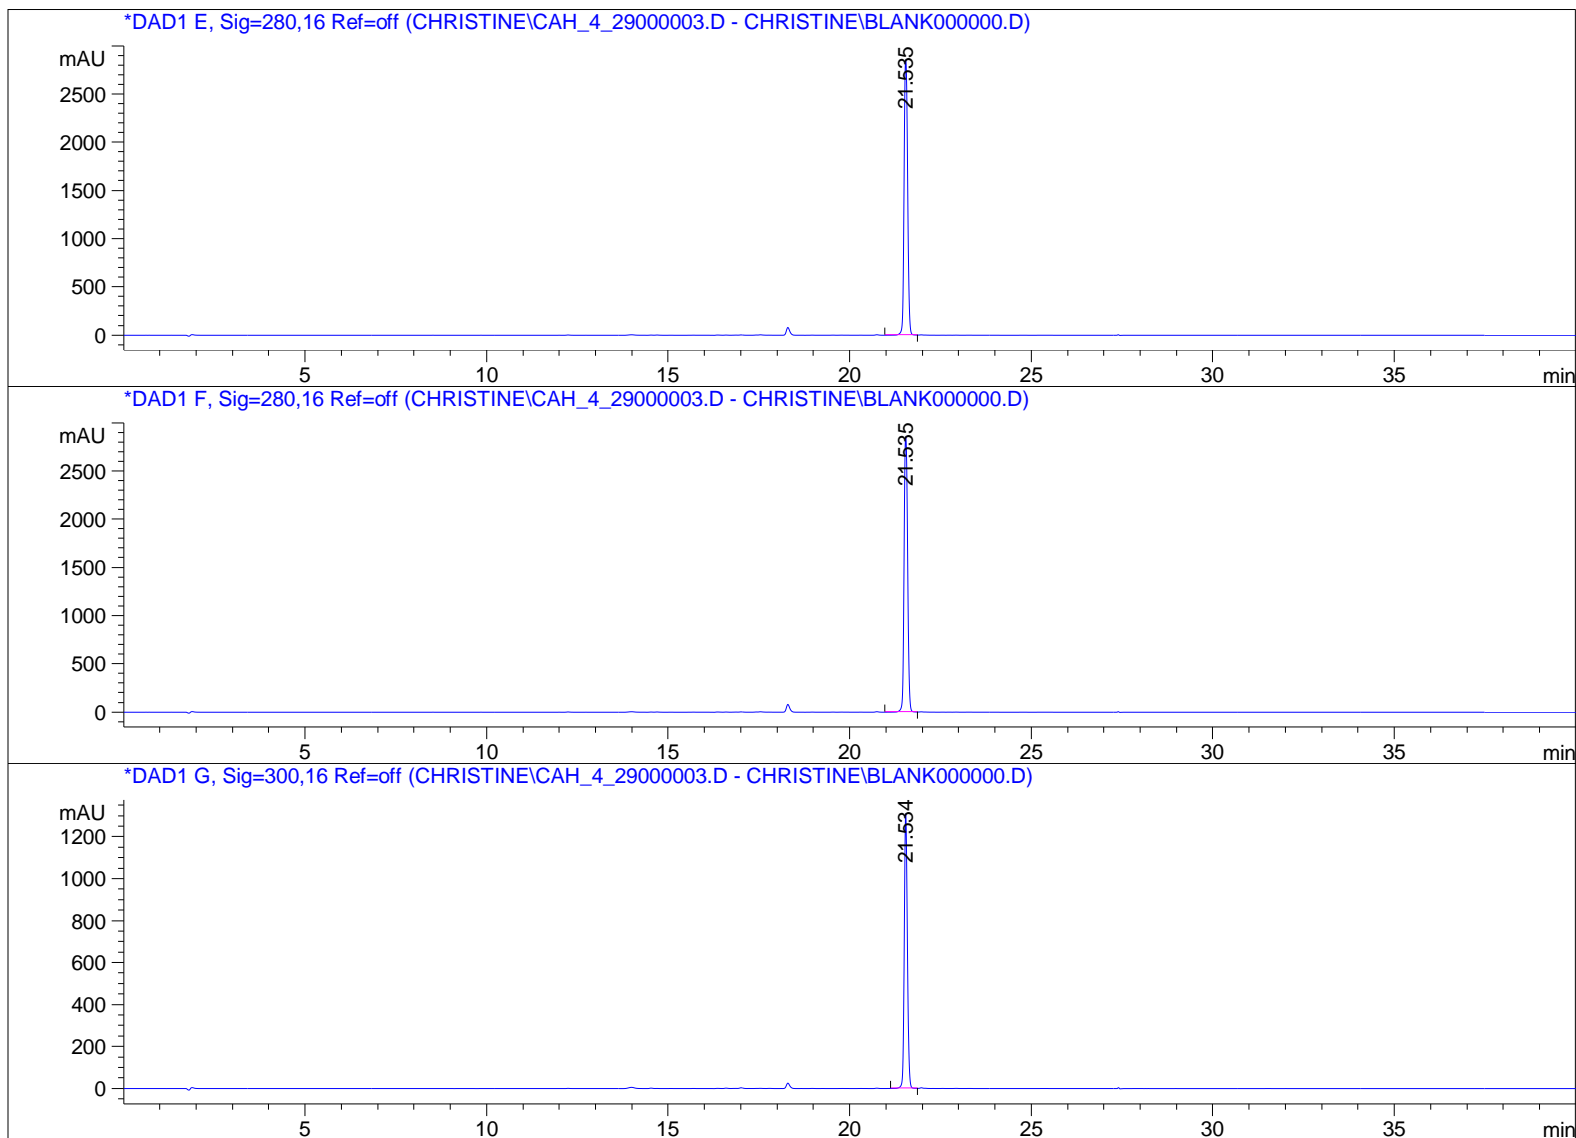

```
=====
                          Area Percent Report
=====
```

```
Sorted By      :      Signal
Multiplier     :      1.0000
Dilution      :      1.0000
Use Multiplier & Dilution Factor with ISTDs
```

```
Signal 1: DAD1 A, Sig=254,4 Ref=off
Signal has been modified after loading from rawdata file!
```

| Peak # | RetTime [min] | Type | Width [min] | Area [mAU*s] | Height [mAU] | Area %  |
|--------|---------------|------|-------------|--------------|--------------|---------|
| 1      | 18.289        | BB   | 0.0993      | 1064.28625   | 160.63548    | 3.8307  |
| 2      | 21.534        | BB   | 0.1285      | 2.67186e4    | 3368.47388   | 96.1693 |

```
Totals :                2.77828e4  3529.10936
```

Sample Name: CAH\_4\_29

Signal 2: DAD1 B, Sig=254,16 Ref=off

Signal has been modified after loading from rawdata file!

| Peak # | RetTime [min] | Type | Width [min] | Area [mAU*s] | Height [mAU] | Area %  |
|--------|---------------|------|-------------|--------------|--------------|---------|
| 1      | 18.289        | BB   | 0.1013      | 982.76642    | 148.33012    | 3.6253  |
| 2      | 21.535        | BB   | 0.1243      | 2.61255e4    | 3375.99023   | 96.3747 |

Totals :                                   2.71083e4 3524.32036

Signal 3: DAD1 C, Sig=210,8 Ref=off

Signal has been modified after loading from rawdata file!

| Peak # | RetTime [min] | Type | Width [min] | Area [mAU*s] | Height [mAU] | Area %  |
|--------|---------------|------|-------------|--------------|--------------|---------|
| 1      | 18.289        | BV   | 0.1015      | 1865.43298   | 280.66962    | 5.1837  |
| 2      | 21.540        | BV   | 0.1622      | 3.41209e4    | 3424.46191   | 94.8163 |

Totals :                                   3.59864e4 3705.13153

Signal 4: DAD1 D, Sig=230,16 Ref=off

Signal has been modified after loading from rawdata file!

| Peak # | RetTime [min] | Type | Width [min] | Area [mAU*s] | Height [mAU] | Area %  |
|--------|---------------|------|-------------|--------------|--------------|---------|
| 1      | 18.289        | BV   | 0.1014      | 1306.26282   | 196.81532    | 4.0403  |
| 2      | 21.534        | BV   | 0.1430      | 3.10247e4    | 3515.33618   | 95.9597 |

Totals :                                   3.23309e4 3712.15150

Signal 5: DAD1 E, Sig=280,16 Ref=off

Signal has been modified after loading from rawdata file!

| Peak # | RetTime [min] | Type | Width [min] | Area [mAU*s] | Height [mAU] | Area %   |
|--------|---------------|------|-------------|--------------|--------------|----------|
| 1      | 21.535        | BV   | 0.1074      | 1.94384e4    | 2855.78076   | 100.0000 |

Totals :                                   1.94384e4 2855.78076



Sample Name: CAH\_4\_29

Signal 6: DAD1 F, Sig=280,16 Ref=off

Signal has been modified after loading from rawdata file!

| Peak # | RetTime [min] | Type | Width [min] | Area [mAU*s] | Height [mAU] | Area %   |
|--------|---------------|------|-------------|--------------|--------------|----------|
| 1      | 21.535        | BV   | 0.1074      | 1.94384e4    | 2855.78076   | 100.0000 |

Totals : 1.94384e4 2855.78076

Signal 7: DAD1 G, Sig=300,16 Ref=off

Signal has been modified after loading from rawdata file!

| Peak # | RetTime [min] | Type | Width [min] | Area [mAU*s] | Height [mAU] | Area %   |
|--------|---------------|------|-------------|--------------|--------------|----------|
| 1      | 21.534        | BV   | 0.0938      | 7832.92432   | 1309.62927   | 100.0000 |

Totals : 7832.92432 1309.62927

=====  
\*\*\* End of Report \*\*\*

# HRMS for compound 32

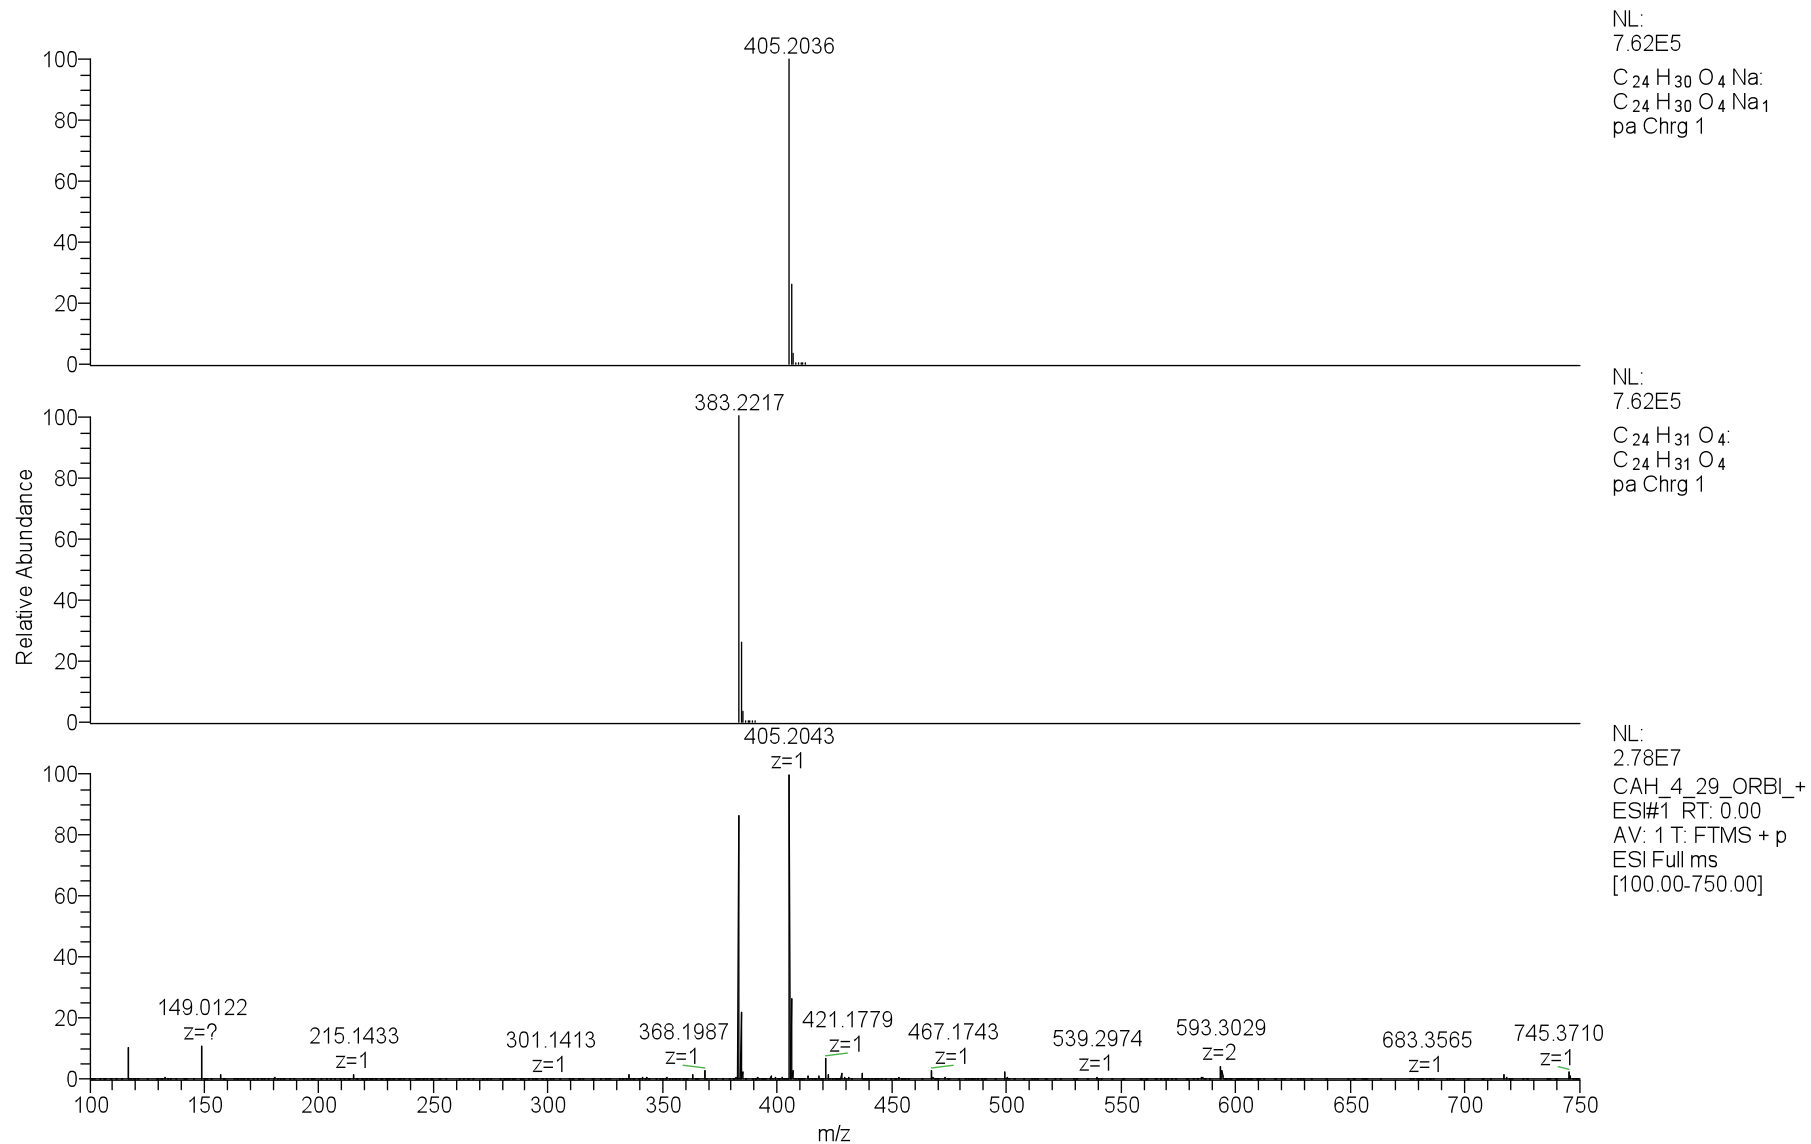

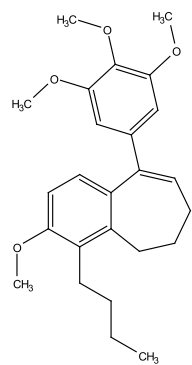

**33**

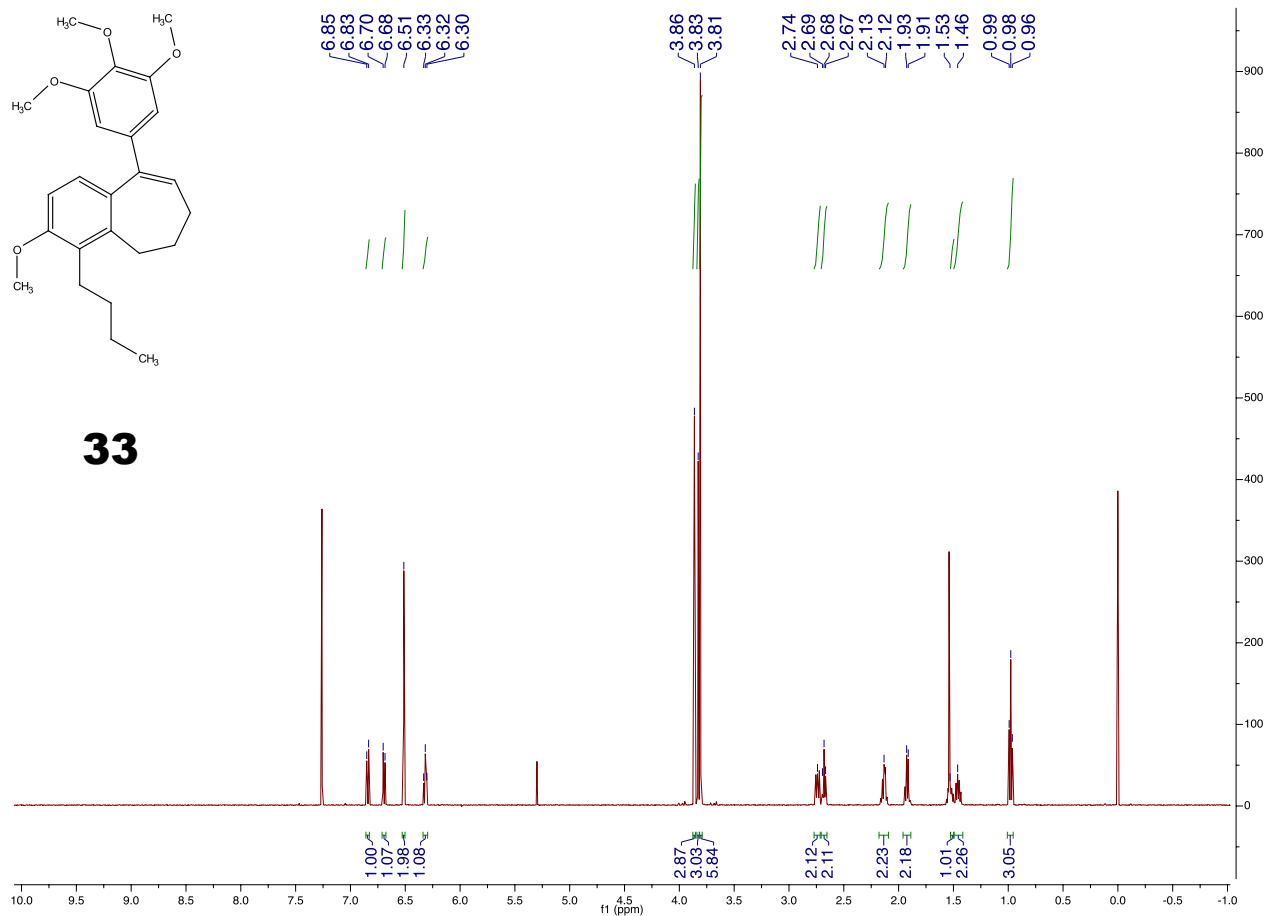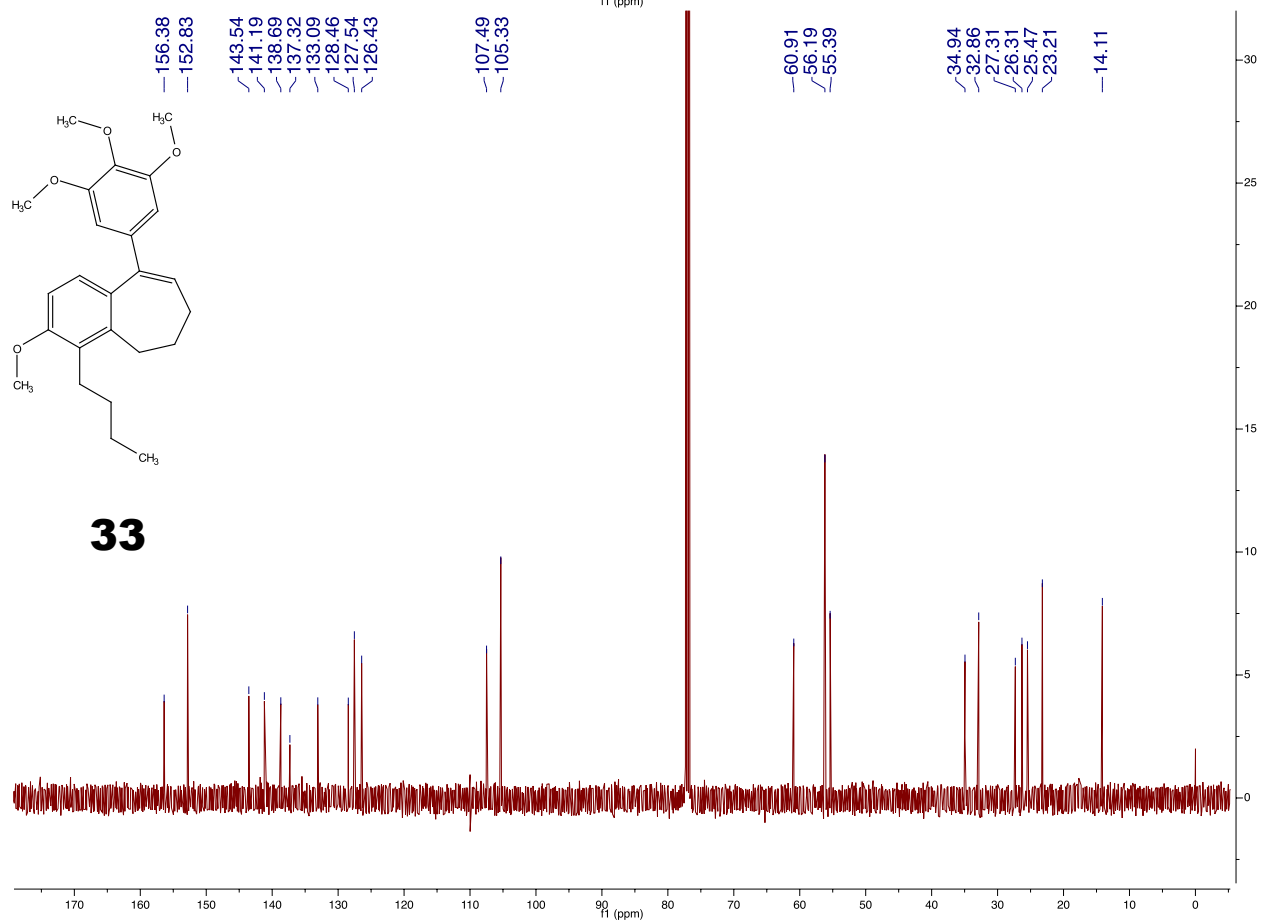

**33**

Sample Name: KGP407

**HPLC for compound 33**

=====

Acq. Operator : HAICHAN NIU  
 Acq. Instrument : Instrument 1 Location : -  
 Injection Date : 5/22/2014 5:52:09 PM  
 Acq. Method : C:\CHEM32\1\METHODS\MASTERMETHOD.M  
 Last changed : 5/22/2014 5:43:44 PM by HAICHAN NIU  
 Analysis Method : C:\CHEM32\1\DATA\HAICHAN NIU\KGP407000006.D\DA.M (MASTERMETHOD.M)  
 Last changed : 5/22/2014 7:08:38 PM by HAICHAN NIU

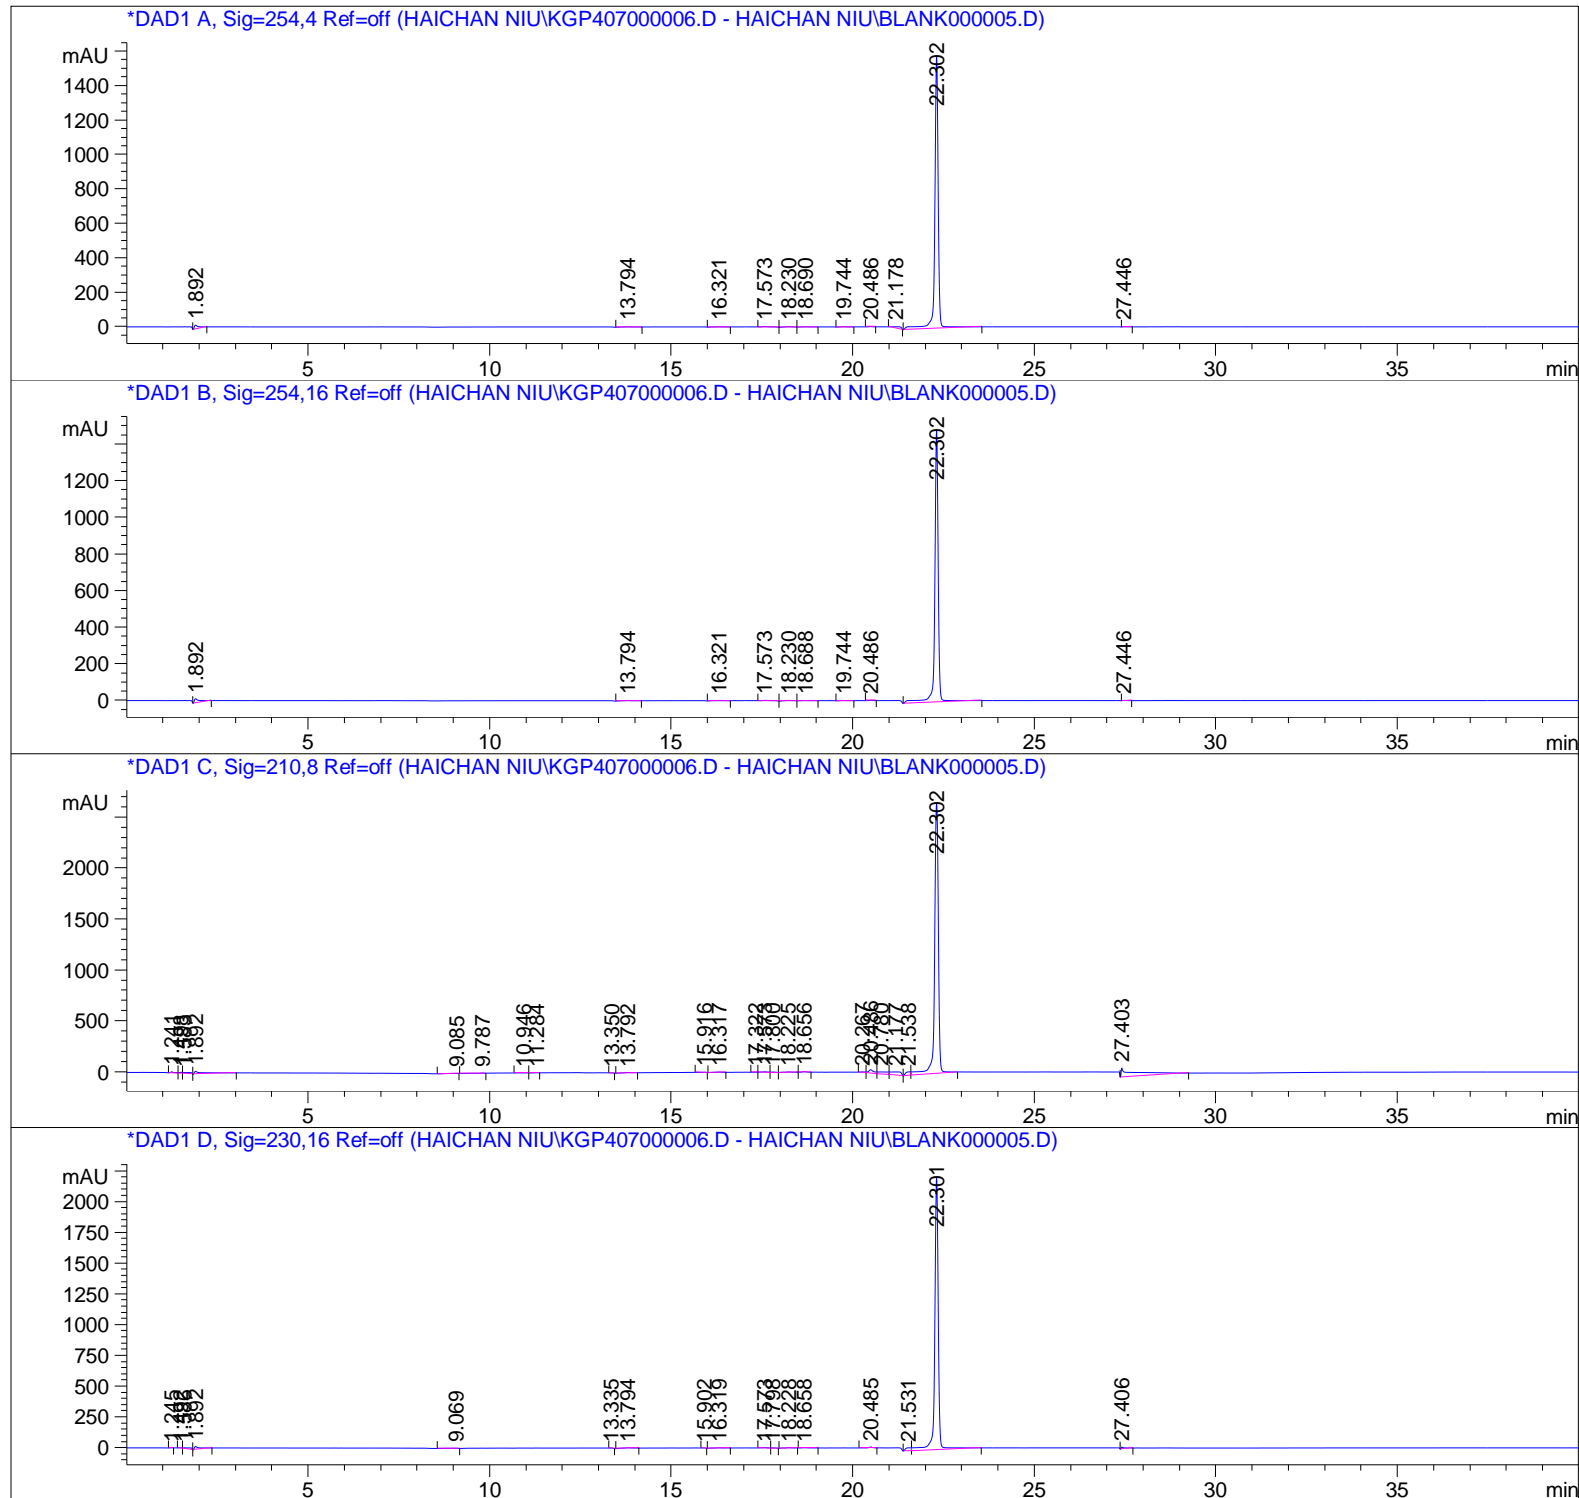**S76**

Sample Name: KGP407

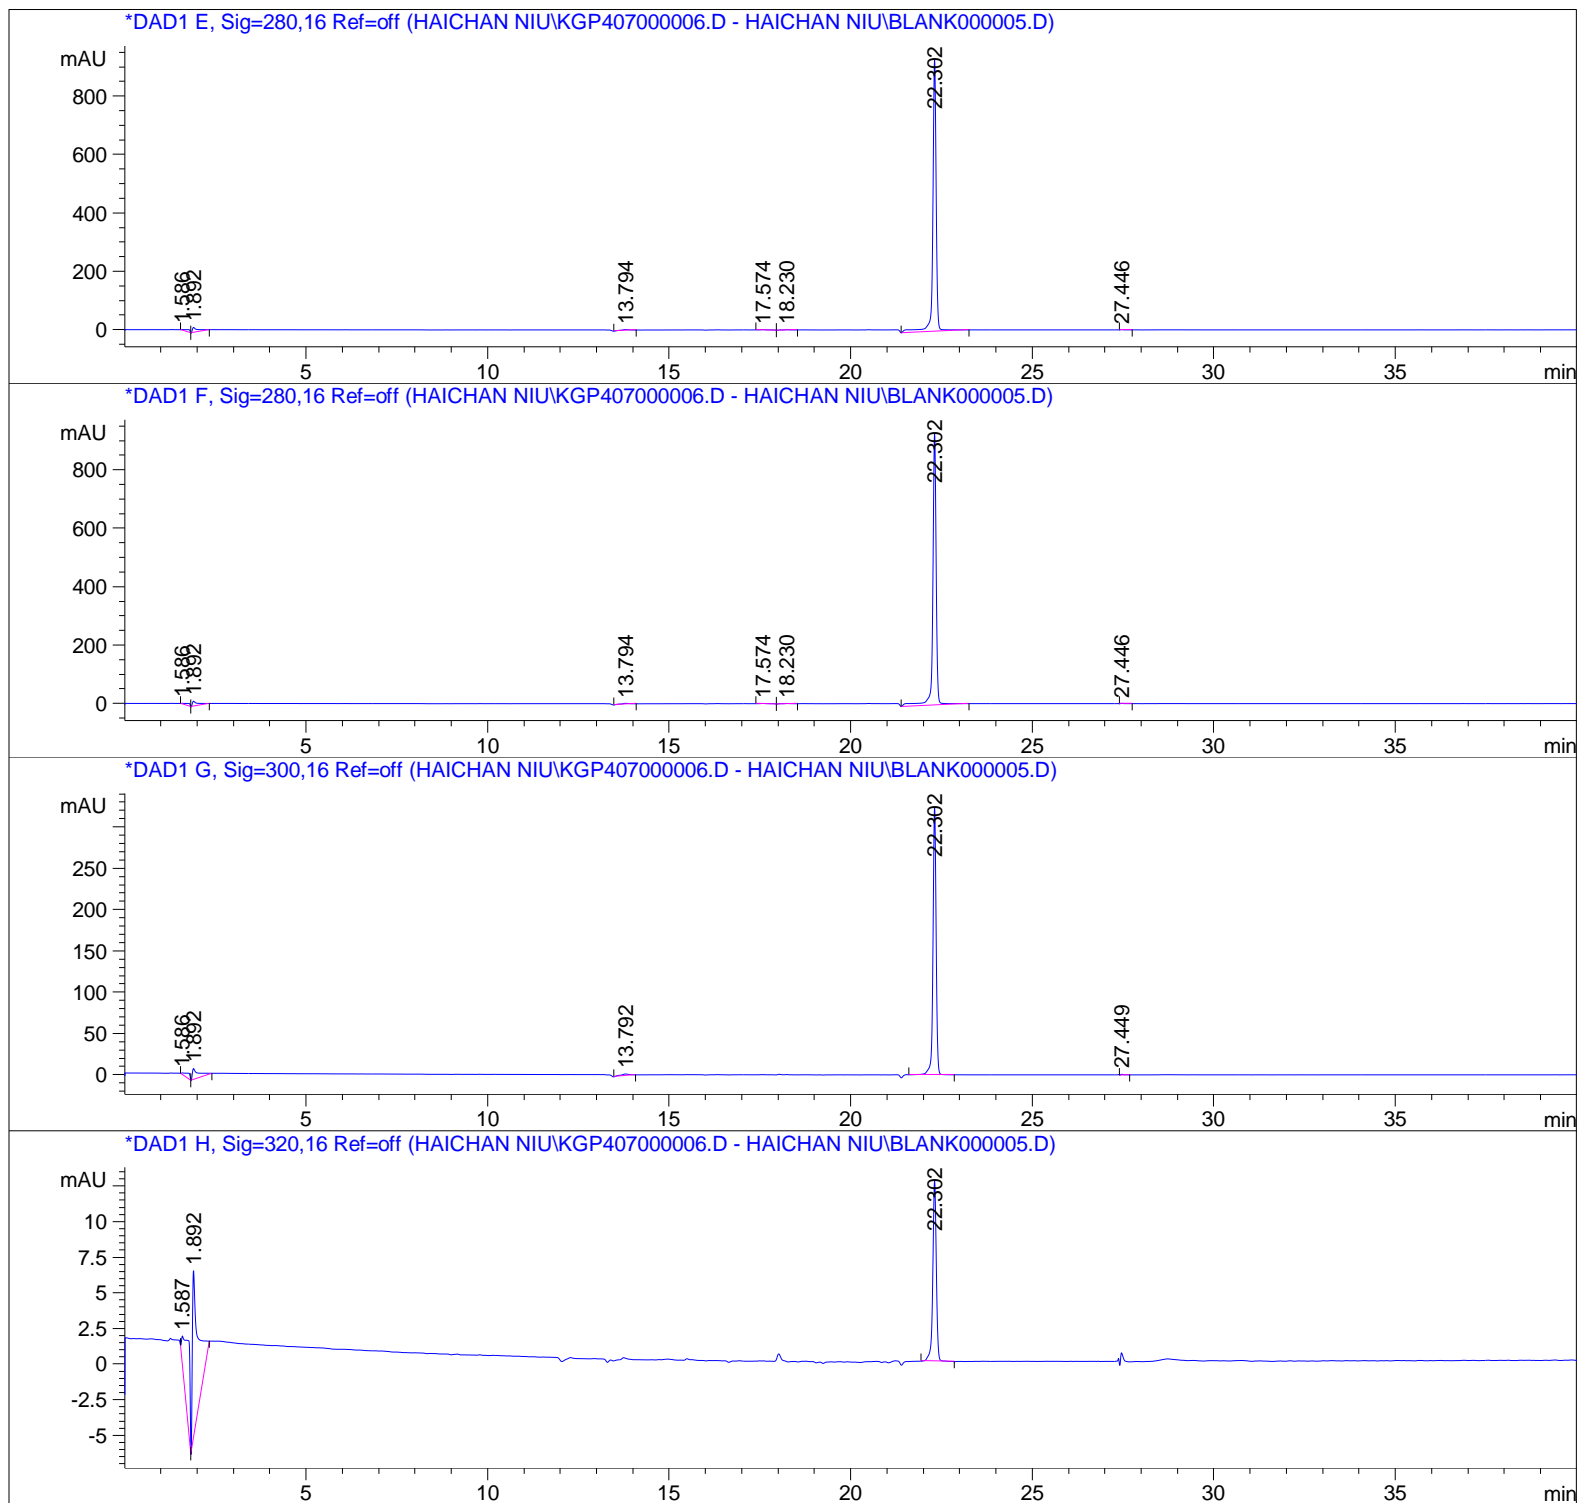=====  
Area Percent Report  
=====

Sorted By : Signal  
Multiplier : 1.0000  
Dilution : 1.0000  
Use Multiplier & Dilution Factor with ISTDs

**S77**

Sample Name: KGP407

Signal 1: DAD1 A, Sig=254,4 Ref=off

Signal has been modified after loading from rawdata file!

| Peak # | RetTime [min] | Type | Width [min] | Area [mAU*s] | Height [mAU] | Area %  |
|--------|---------------|------|-------------|--------------|--------------|---------|
| 1      | 1.892         | BB   | 0.1220      | 205.61472    | 23.05705     | 1.8377  |
| 2      | 13.794        | BB   | 0.2701      | 37.55608     | 1.82508      | 0.3357  |
| 3      | 16.321        | BB   | 0.2518      | 29.26817     | 1.48607      | 0.2616  |
| 4      | 17.573        | BB   | 0.2588      | 59.74598     | 2.94312      | 0.5340  |
| 5      | 18.230        | BV   | 0.2229      | 63.97398     | 3.75268      | 0.5718  |
| 6      | 18.690        | VB   | 0.2388      | 31.14396     | 1.72357      | 0.2784  |
| 7      | 19.744        | BB   | 0.1574      | 17.63064     | 1.54186      | 0.1576  |
| 8      | 20.486        | BB   | 0.0941      | 8.51472      | 1.41805      | 0.0761  |
| 9      | 21.178        | BB   | 0.2529      | 172.74390    | 8.96248      | 1.5439  |
| 10     | 22.302        | BB   | 0.0998      | 1.05476e4    | 1581.28418   | 94.2714 |
| 11     | 27.446        | BB   | 0.0992      | 14.75580     | 2.12002      | 0.1319  |

Totals : 1.11886e4 1630.11415

Signal 2: DAD1 B, Sig=254,16 Ref=off

Signal has been modified after loading from rawdata file!

| Peak # | RetTime [min] | Type | Width [min] | Area [mAU*s] | Height [mAU] | Area %  |
|--------|---------------|------|-------------|--------------|--------------|---------|
| 1      | 1.892         | BB   | 0.1472      | 257.07364    | 23.21323     | 2.4674  |
| 2      | 13.794        | BB   | 0.2658      | 42.60092     | 2.10777      | 0.4089  |
| 3      | 16.321        | BB   | 0.2519      | 29.39858     | 1.49186      | 0.2822  |
| 4      | 17.573        | BB   | 0.2544      | 55.46112     | 2.78468      | 0.5323  |
| 5      | 18.230        | BV   | 0.2228      | 58.92264     | 3.45830      | 0.5655  |
| 6      | 18.688        | VB   | 0.2361      | 29.00475     | 1.62596      | 0.2784  |
| 7      | 19.744        | BB   | 0.1552      | 15.84321     | 1.40894      | 0.1521  |
| 8      | 20.486        | BB   | 0.0947      | 10.03956     | 1.65767      | 0.0964  |
| 9      | 22.302        | BB   | 0.0997      | 9906.66016   | 1486.84314   | 95.0838 |
| 10     | 27.446        | BB   | 0.0952      | 13.86449     | 2.04266      | 0.1331  |

Totals : 1.04189e4 1526.63420

Signal 3: DAD1 C, Sig=210,8 Ref=off

Signal has been modified after loading from rawdata file!

| Peak # | RetTime [min] | Type | Width [min] | Area [mAU*s] | Height [mAU] | Area % |
|--------|---------------|------|-------------|--------------|--------------|--------|
| 1      | 1.241         | BV   | 0.1166      | 112.43739    | 12.53983     | 0.4377 |
| 2      | 1.498         | VV   | 0.0978      | 86.76828     | 12.38144     | 0.3378 |
| 3      | 1.583         | VB   | 0.2030      | 212.25829    | 12.96423     | 0.8263 |

Sample Name: KGP407

| Peak # | RetTime [min] | Type | Width [min] | Area [mAU*s] | Height [mAU] | Area %  |
|--------|---------------|------|-------------|--------------|--------------|---------|
| 4      | 1.892         | BB   | 0.2722      | 610.39325    | 28.00976     | 2.3763  |
| 5      | 9.085         | BB   | 0.3602      | 37.33203     | 1.28795      | 0.1453  |
| 6      | 9.787         | BB   | 0.2183      | 29.35772     | 1.72761      | 0.1143  |
| 7      | 10.946        | BB   | 0.2118      | 16.74347     | 1.06277      | 0.0652  |
| 8      | 11.284        | BB   | 0.0998      | 9.72657      | 1.45764      | 0.0379  |
| 9      | 13.350        | BB   | 0.0951      | 9.75790      | 1.69781      | 0.0380  |
| 10     | 13.792        | BB   | 0.2570      | 68.78865     | 3.59853      | 0.2678  |
| 11     | 15.916        | BB   | 0.1142      | 30.48277     | 3.85870      | 0.1187  |
| 12     | 16.317        | BB   | 0.1950      | 49.96380     | 3.36880      | 0.1945  |
| 13     | 17.322        | BV   | 0.1185      | 11.81782     | 1.52267      | 0.0460  |
| 14     | 17.573        | VV   | 0.1797      | 82.90123     | 6.05778      | 0.3227  |
| 15     | 17.800        | VB   | 0.1581      | 45.04564     | 4.68686      | 0.1754  |
| 16     | 18.225        | BV   | 0.2371      | 97.94218     | 5.36237      | 0.3813  |
| 17     | 18.656        | VB   | 0.1299      | 51.54269     | 5.90078      | 0.2007  |
| 18     | 20.267        | BV   | 0.1402      | 54.50468     | 5.57007      | 0.2122  |
| 19     | 20.486        | VV   | 0.1512      | 369.62842    | 33.90767     | 1.4390  |
| 20     | 20.780        | VV   | 0.2662      | 439.56110    | 21.00230     | 1.7112  |
| 21     | 21.177        | VB   | 0.2569      | 660.56427    | 32.80515     | 2.5716  |
| 22     | 21.538        | BV   | 0.1592      | 361.84375    | 36.00524     | 1.4087  |
| 23     | 22.302        | VB   | 0.1133      | 1.93617e4    | 2647.61377   | 75.3753 |
| 24     | 27.403        | BB   | 0.3710      | 2875.97852   | 92.43199     | 11.1962 |

Totals : 2.56870e4 2976.82171

Signal 4: DAD1 D, Sig=230,16 Ref=off

Signal has been modified after loading from rawdata file!

| Peak # | RetTime [min] | Type | Width [min] | Area [mAU*s] | Height [mAU] | Area %  |
|--------|---------------|------|-------------|--------------|--------------|---------|
| 1      | 1.245         | BB   | 0.0525      | 6.08144      | 1.75071      | 0.0372  |
| 2      | 1.492         | BV   | 0.0864      | 23.75330     | 3.93887      | 0.1453  |
| 3      | 1.586         | VB   | 0.2551      | 169.37418    | 8.12729      | 1.0359  |
| 4      | 1.892         | BB   | 0.1505      | 300.81332    | 26.48990     | 1.8398  |
| 5      | 9.069         | BB   | 0.3211      | 40.21803     | 1.57932      | 0.2460  |
| 6      | 13.335        | BB   | 0.1097      | 11.15828     | 1.59429      | 0.0682  |
| 7      | 13.794        | BB   | 0.2532      | 86.28983     | 4.55197      | 0.5277  |
| 8      | 15.902        | BB   | 0.0896      | 8.10509      | 1.39794      | 0.0496  |
| 9      | 16.319        | BB   | 0.2450      | 47.99840     | 2.51118      | 0.2936  |
| 10     | 17.573        | BV   | 0.1604      | 43.86290     | 3.69786      | 0.2683  |
| 11     | 17.798        | VB   | 0.1637      | 28.22668     | 2.79859      | 0.1726  |
| 12     | 18.228        | BB   | 0.2038      | 54.62132     | 3.54339      | 0.3341  |
| 13     | 18.658        | BB   | 0.1438      | 20.38937     | 2.05419      | 0.1247  |
| 14     | 20.485        | BB   | 0.1017      | 46.16708     | 6.93190      | 0.2824  |
| 15     | 21.531        | BV   | 0.1647      | 265.59775    | 25.25007     | 1.6244  |
| 16     | 22.301        | VB   | 0.1035      | 1.50731e4    | 2211.43604   | 92.1866 |
| 17     | 27.406        | BB   | 0.0975      | 124.87911    | 16.64479     | 0.7638  |

**S79**

Sample Name: KGP407

Totals : 1.63506e4 2324.29829

Signal 5: DAD1 E, Sig=280,16 Ref=off

Signal has been modified after loading from rawdata file!

| Peak # | RetTime [min] | Type | Width [min] | Area [mAU*s] | Height [mAU] | Area %  |
|--------|---------------|------|-------------|--------------|--------------|---------|
| 1      | 1.586         | BB   | 0.3822      | 88.06649     | 2.77503      | 1.3521  |
| 2      | 1.892         | BB   | 0.1496      | 198.73843    | 17.89013     | 3.0512  |
| 3      | 13.794        | BB   | 0.2504      | 67.00623     | 3.57945      | 1.0287  |
| 4      | 17.574        | BB   | 0.2352      | 23.93932     | 1.31028      | 0.3675  |
| 5      | 18.230        | BB   | 0.2013      | 23.77900     | 1.54734      | 0.3651  |
| 6      | 22.302        | BB   | 0.0984      | 6101.15137   | 931.20624    | 93.6697 |
| 7      | 27.446        | BB   | 0.1011      | 10.79483     | 1.48062      | 0.1657  |

Totals : 6513.47568 959.78909

Signal 6: DAD1 F, Sig=280,16 Ref=off

Signal has been modified after loading from rawdata file!

| Peak # | RetTime [min] | Type | Width [min] | Area [mAU*s] | Height [mAU] | Area %  |
|--------|---------------|------|-------------|--------------|--------------|---------|
| 1      | 1.586         | BB   | 0.3822      | 88.06649     | 2.77503      | 1.3521  |
| 2      | 1.892         | BB   | 0.1496      | 198.73843    | 17.89013     | 3.0512  |
| 3      | 13.794        | BB   | 0.2504      | 67.00623     | 3.57945      | 1.0287  |
| 4      | 17.574        | BB   | 0.2352      | 23.93932     | 1.31028      | 0.3675  |
| 5      | 18.230        | BB   | 0.2013      | 23.77900     | 1.54734      | 0.3651  |
| 6      | 22.302        | BB   | 0.0984      | 6101.15137   | 931.20624    | 93.6697 |
| 7      | 27.446        | BB   | 0.1011      | 10.79483     | 1.48062      | 0.1657  |

Totals : 6513.47568 959.78909

Signal 7: DAD1 G, Sig=300,16 Ref=off

Signal has been modified after loading from rawdata file!

| Peak # | RetTime [min] | Type | Width [min] | Area [mAU*s] | Height [mAU] | Area %  |
|--------|---------------|------|-------------|--------------|--------------|---------|
| 1      | 1.586         | BB   | 0.3828      | 66.66472     | 2.09758      | 2.9911  |
| 2      | 1.892         | BB   | 0.1638      | 167.54794    | 13.59008     | 7.5176  |
| 3      | 13.792        | BB   | 0.2464      | 39.83583     | 2.16750      | 1.7874  |
| 4      | 22.302        | BB   | 0.0922      | 1948.63611   | 324.06201    | 87.4318 |
| 5      | 27.449        | BB   | 0.0828      | 6.06465      | 1.02903      | 0.2721  |

Totals : 2228.74926 342.94620



Sample Name: KGP407

Signal 8: DAD1 H, Sig=320,16 Ref=off

Signal has been modified after loading from rawdata file!

| Peak # | RetTime [min] | Type | Width [min] | Area [mAU*s] | Height [mAU] | Area %  |
|--------|---------------|------|-------------|--------------|--------------|---------|
| 1      | 1.587         | BB   | 0.3806      | 59.15536     | 1.87249      | 21.4918 |
| 2      | 1.892         | BB   | 0.1479      | 130.22919    | 11.87656     | 47.3137 |
| 3      | 22.302        | BB   | 0.1031      | 85.86178     | 12.66659     | 31.1945 |

Totals :                                   275.24632   26.41563

=====  
\*\*\* End of Report \*\*\*

# HRMS for compound 33

1\_125\_KGP407\_1\_125\_KGP407 #500 RT: 3.99 AV: 1 T: FTMS + p ESI Full ms [200.00-700.00] E8

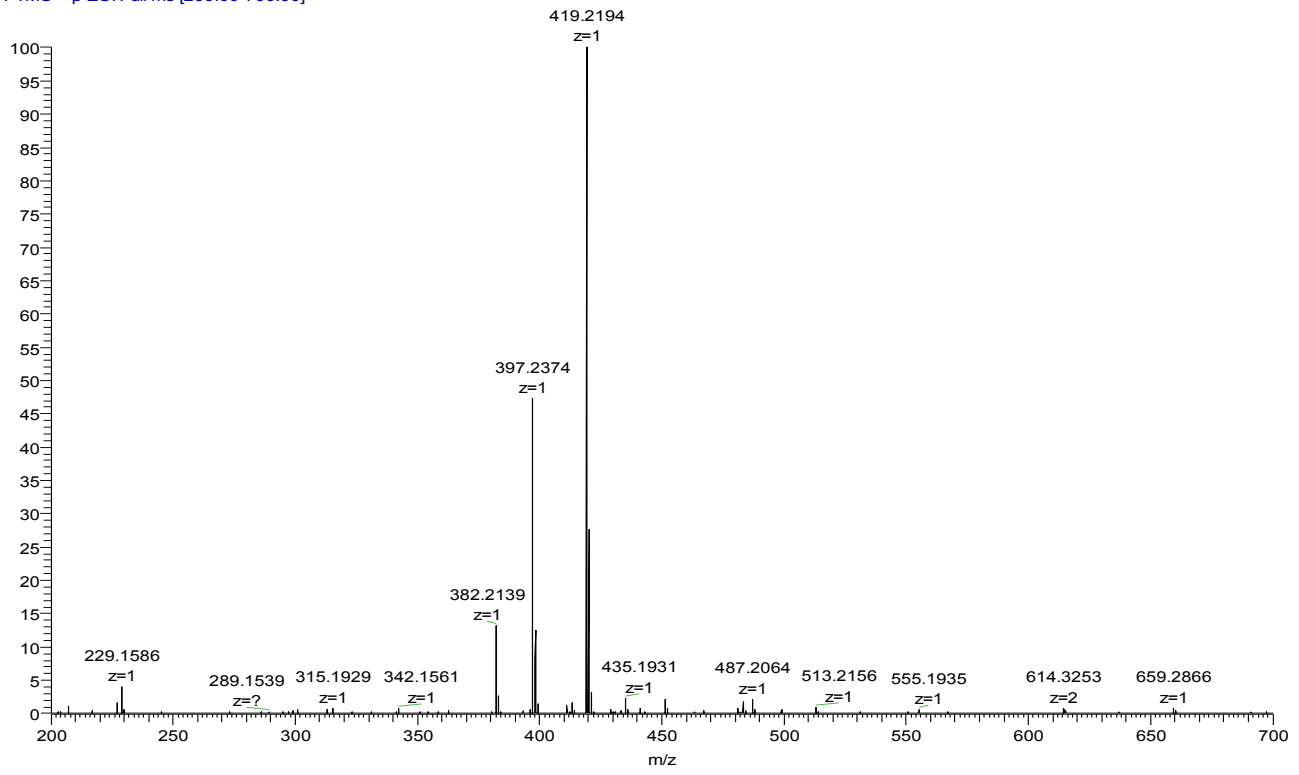

7.75  
7.71

7.26

6.78  
6.76  
6.64  
6.62  
6.51  
6.49  
6.48

3.90  
3.88

2.77  
2.76  
2.74  
2.21  
2.19  
2.18  
2.17  
2.15  
2.05  
2.03  
2.02  
2.01

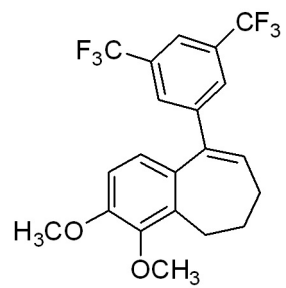

**34**

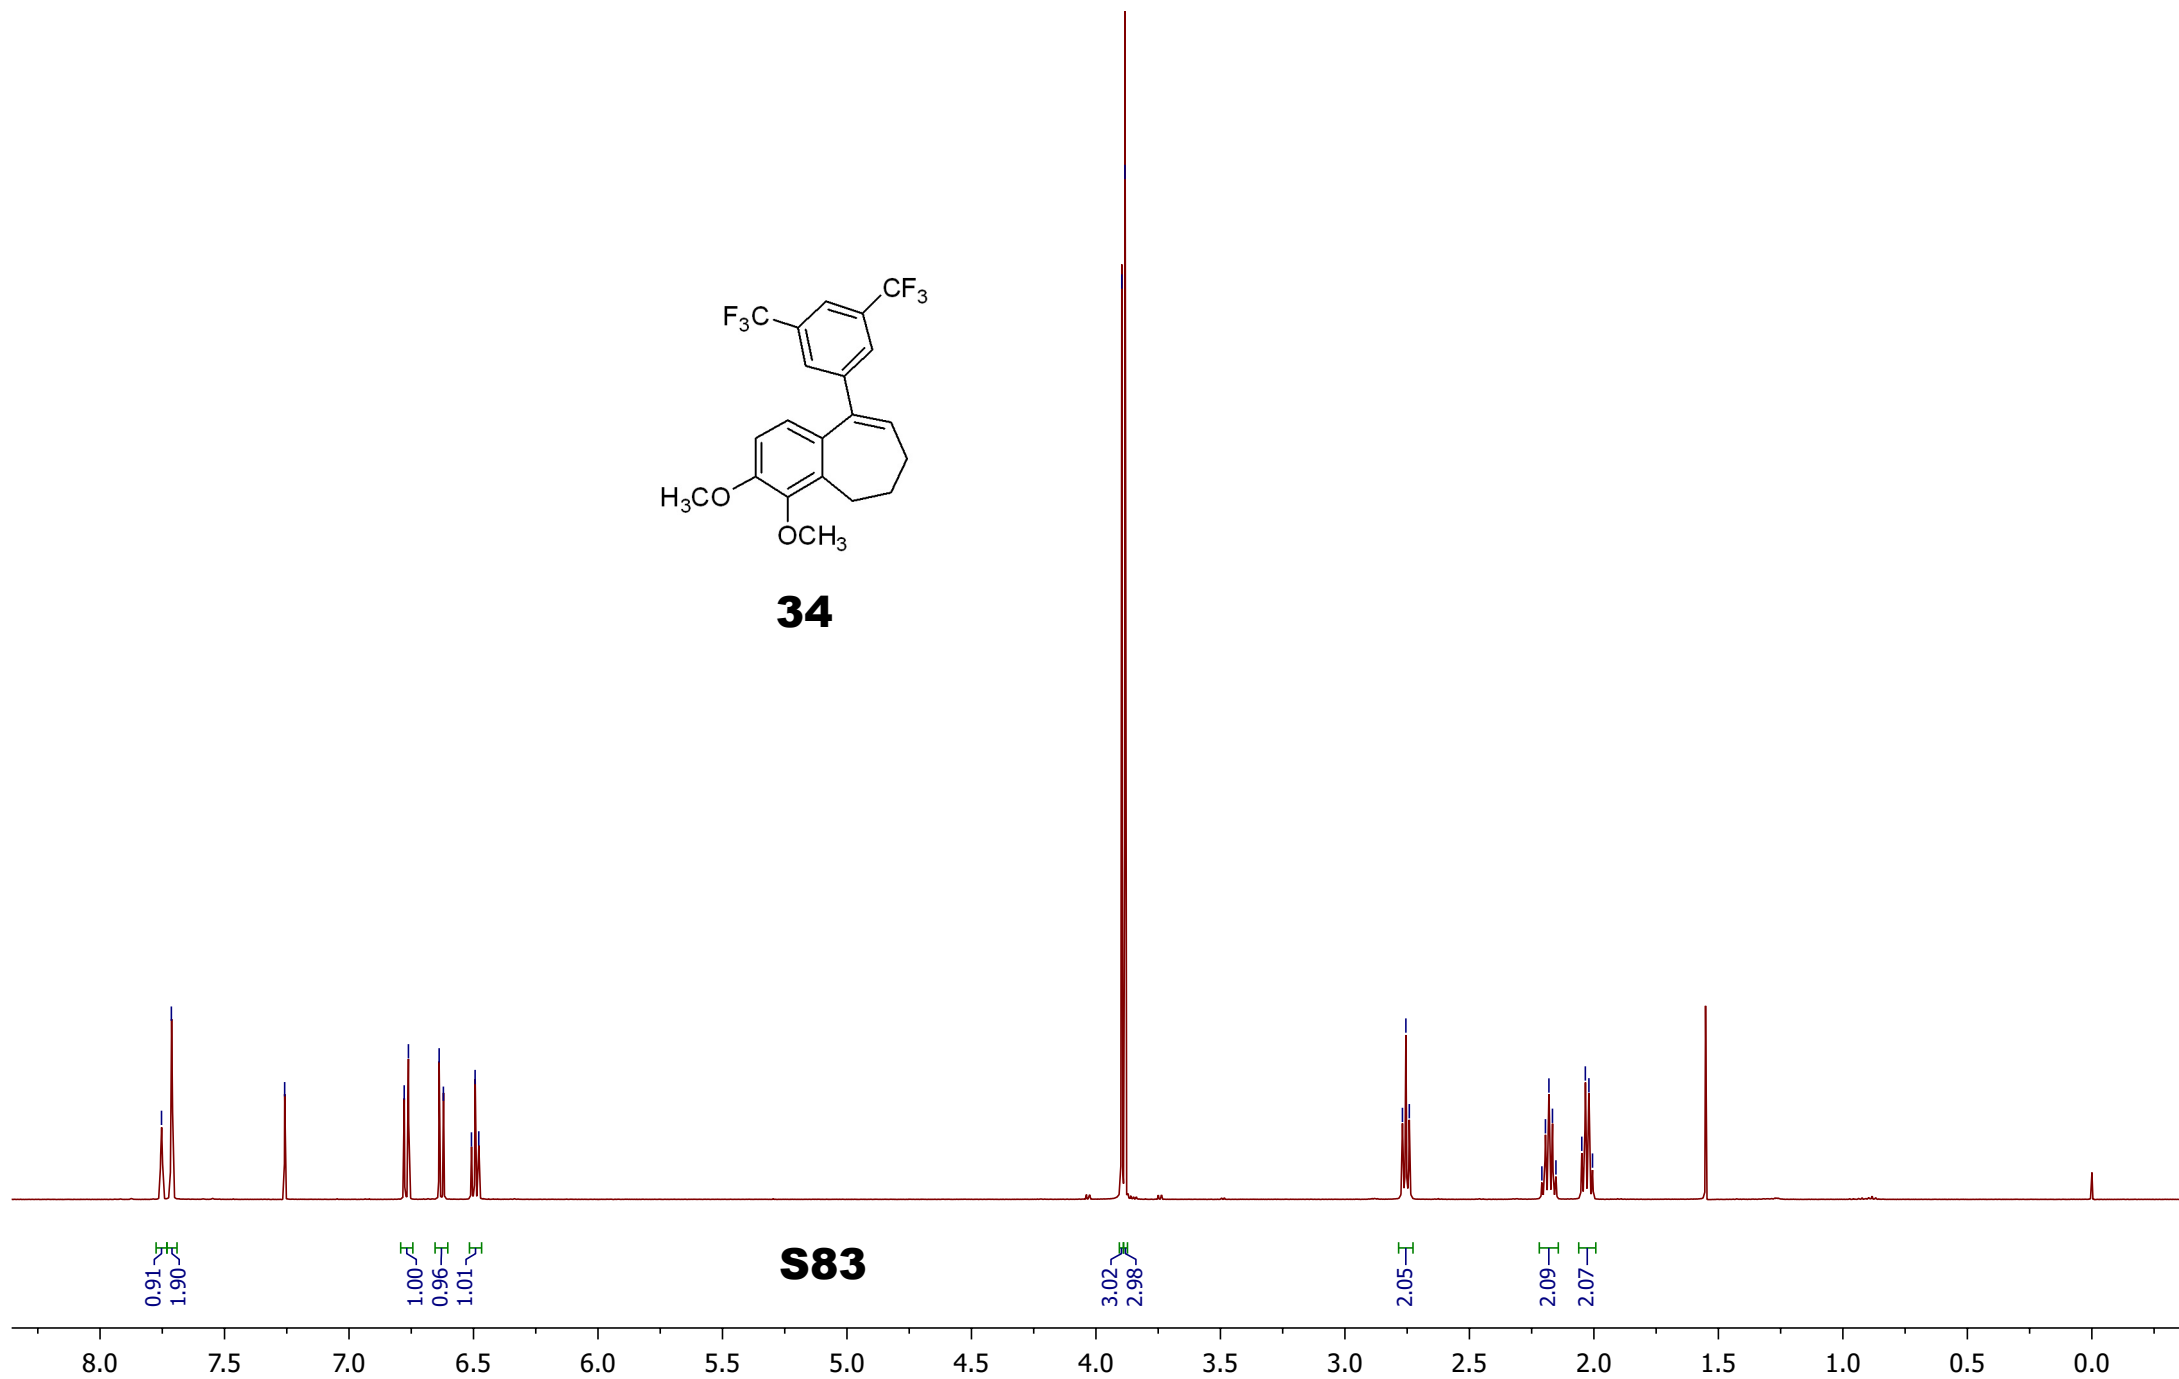

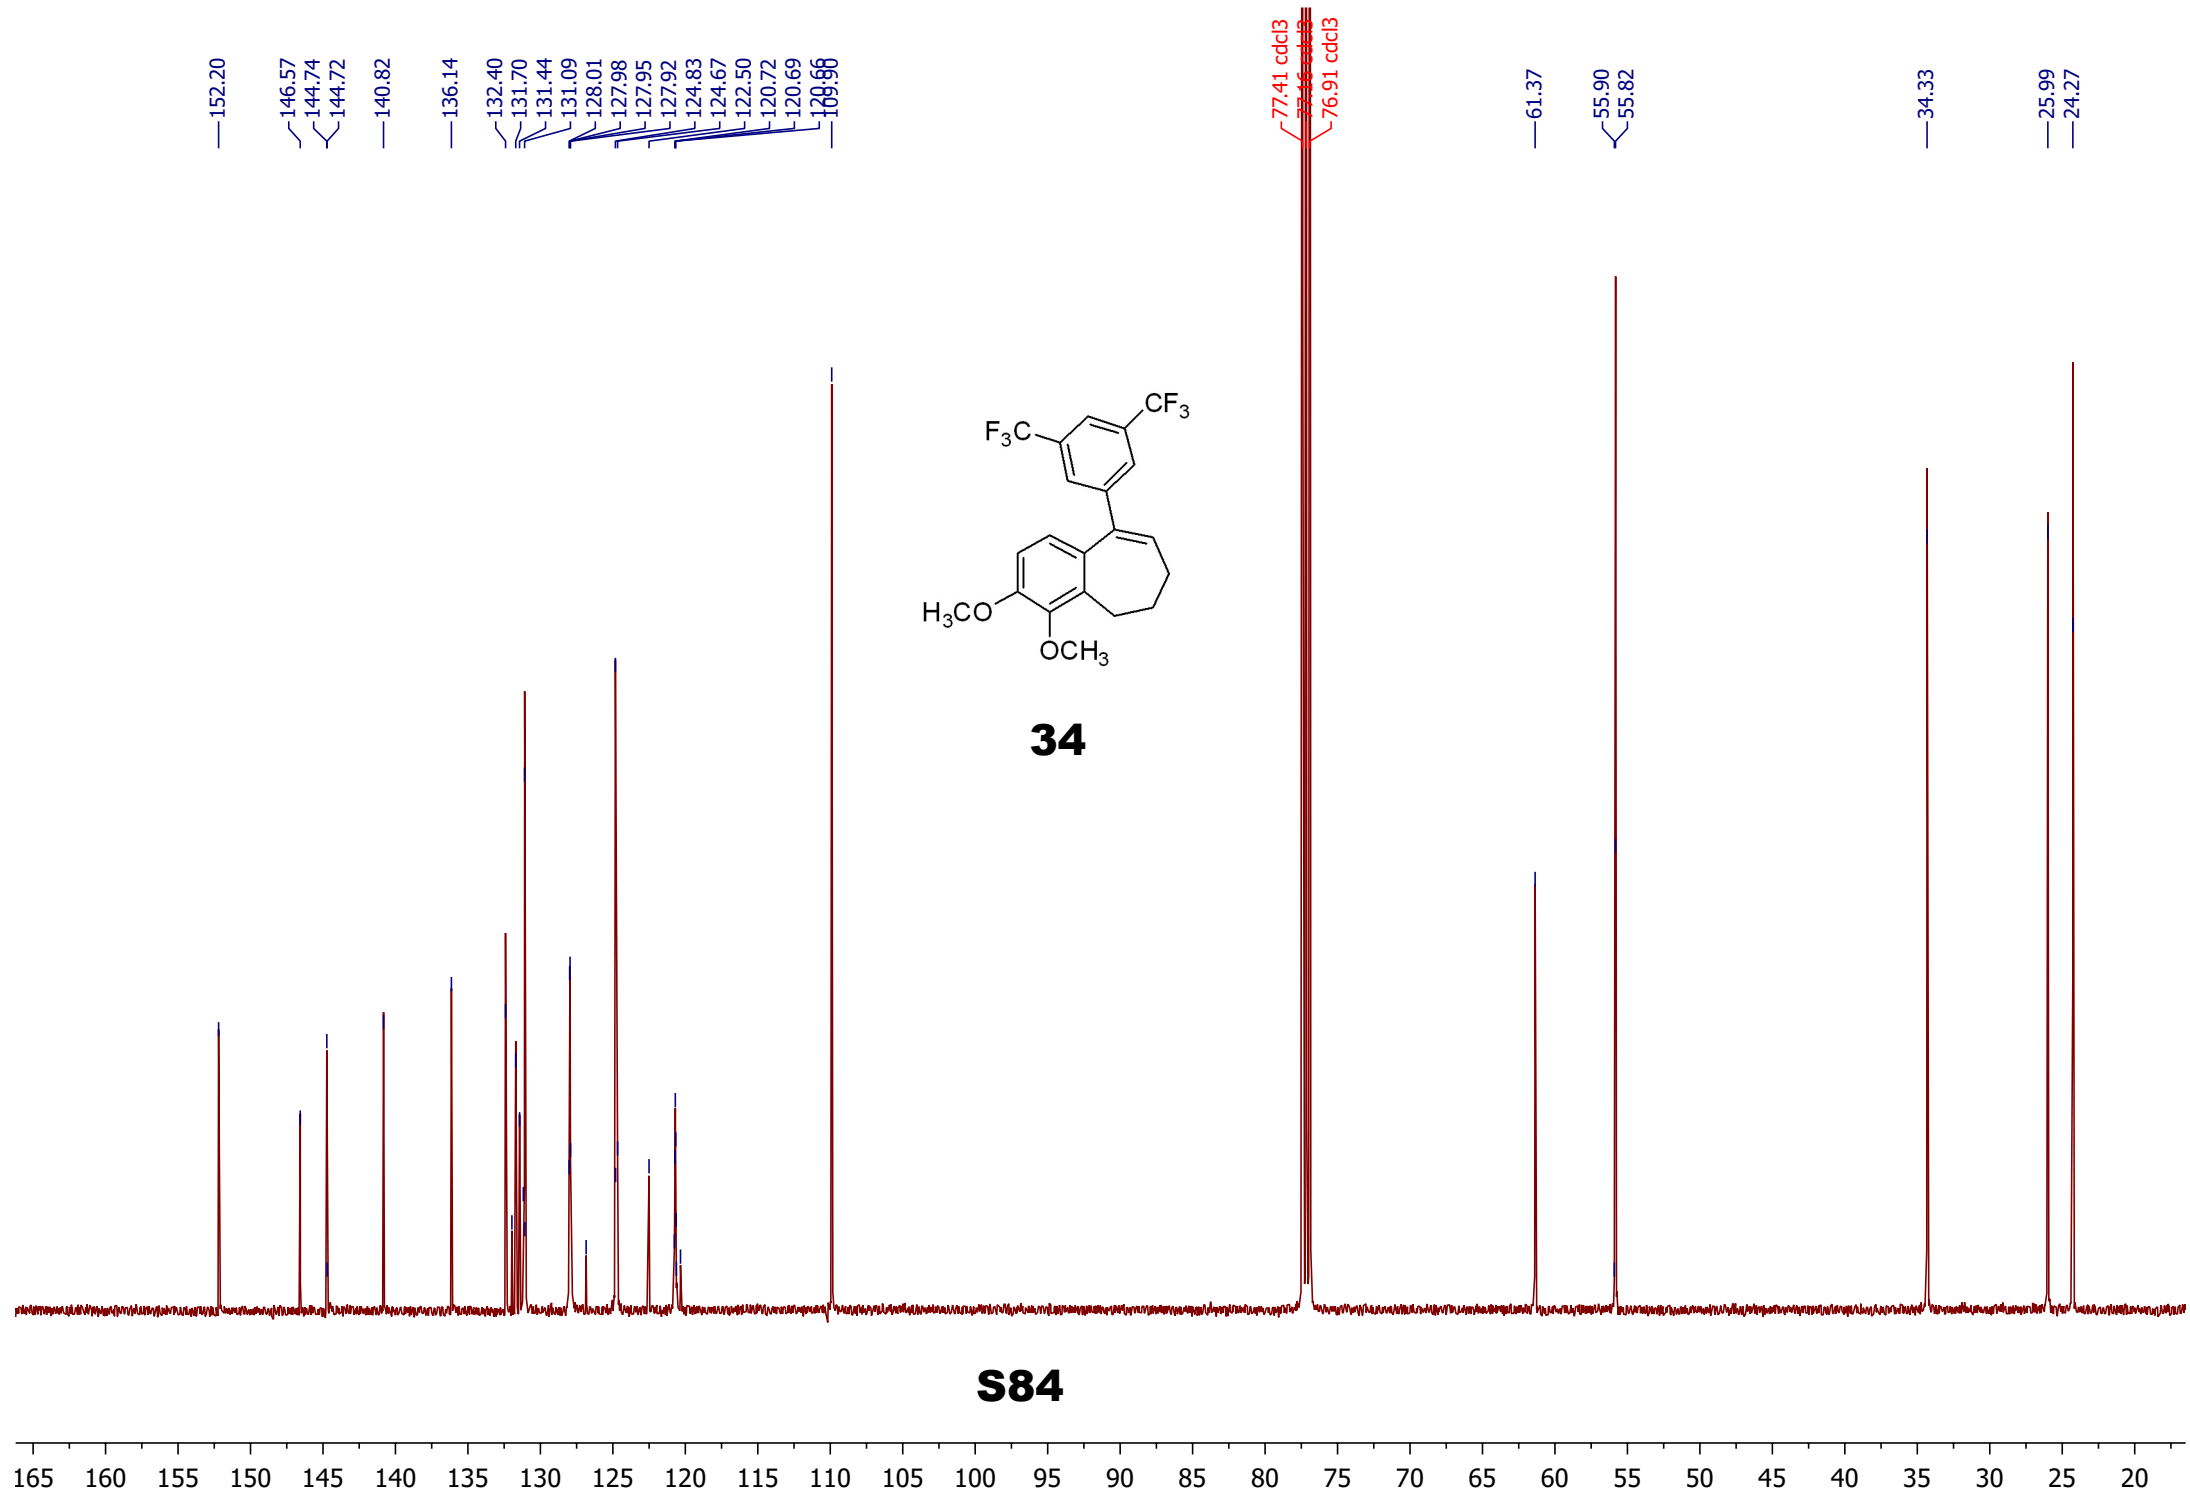

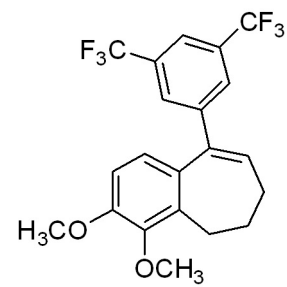

**34**

62.81

**S85**

30 20 10 0 -10 -20 -30 -40 -50 -60 -70 -80 -90 -100 -110 -120 -130 -140 -150 -160 -170 -180 -190 -200

**HPLC for compound 34**

=====

Acq. Operator : Eric Lin  
Acq. Instrument : Instrument 1 Location : -  
Injection Date : 3/11/2014 1:58:36 PM  
Acq. Method : C:\CHEM32\1\METHODS\MASTERMETHOD.M  
Last changed : 3/11/2014 1:55:06 PM by Eric Lin  
Analysis Method : C:\CHEM32\1\DATA\ERIC LIN\CML\_III\_101\_R15.D\DA.M (MASTERMETHOD.M)  
Last changed : 3/11/2014 2:57:57 PM by Eric Lin  
Sample Info : wash

## Method:

0-25 min. (50:50 to 100:0) ACN:Water  
25-30 min. (100:0) ACN:Water  
30-35 min. (100:0 to 50:50) ACN:Water  
35-40 min. (50:50) ACN:Water

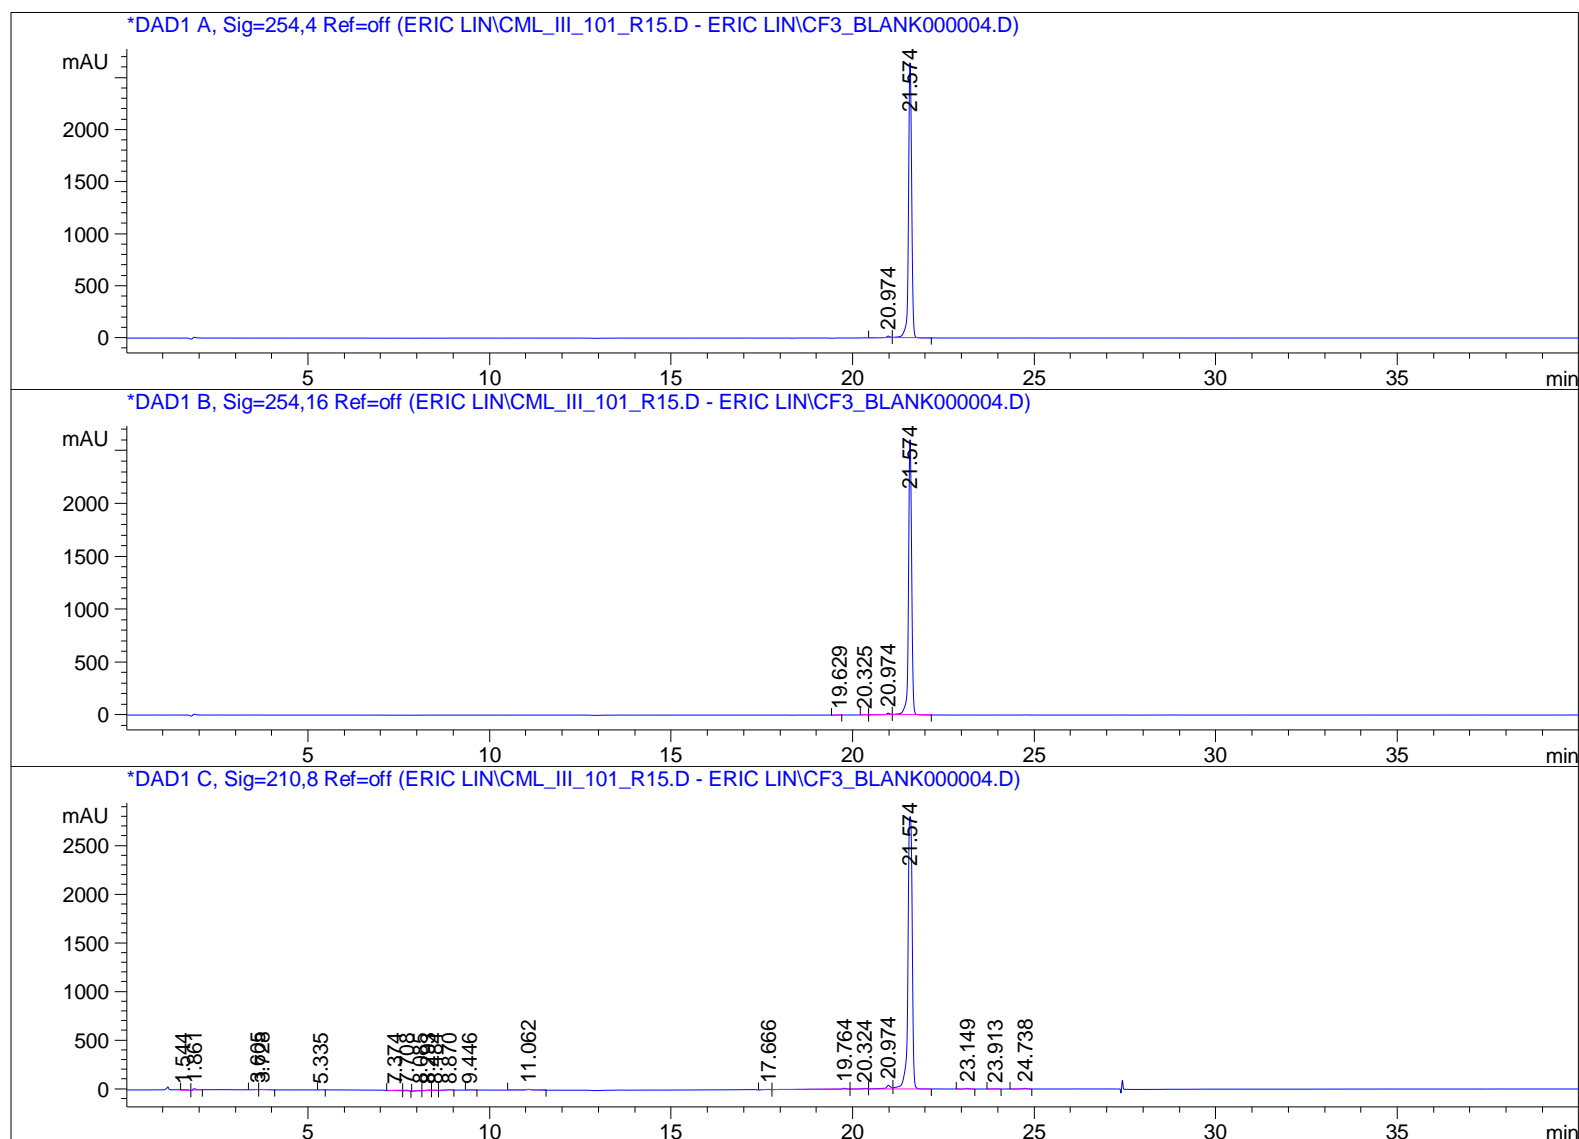**S86**

Sample Name: CML\_III\_101\_r1

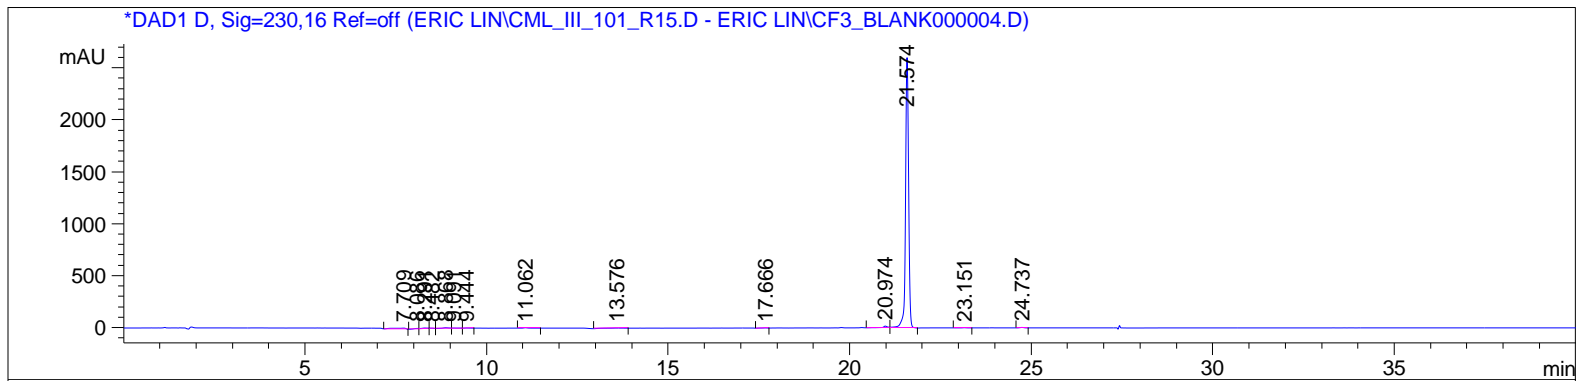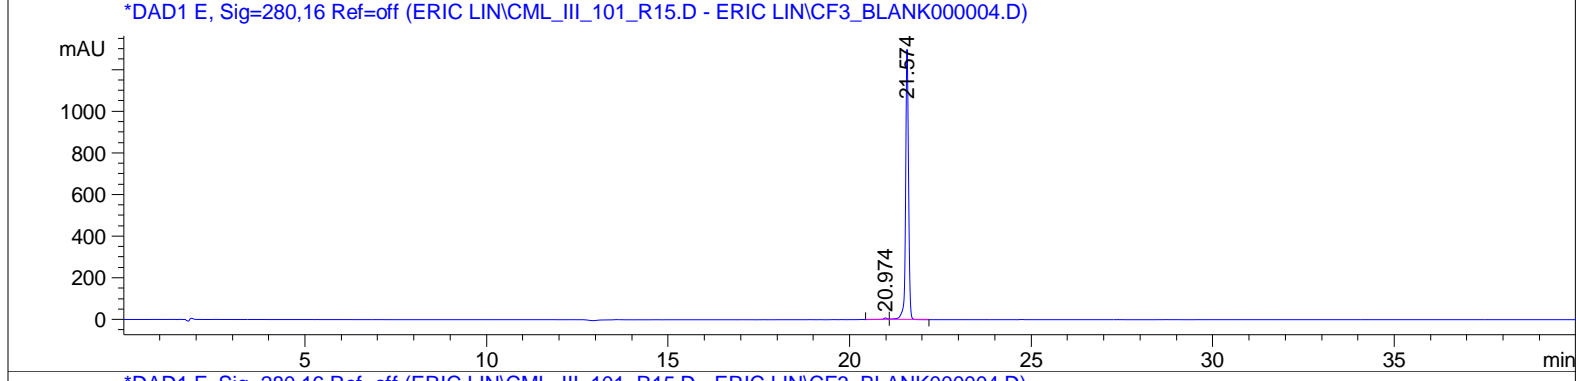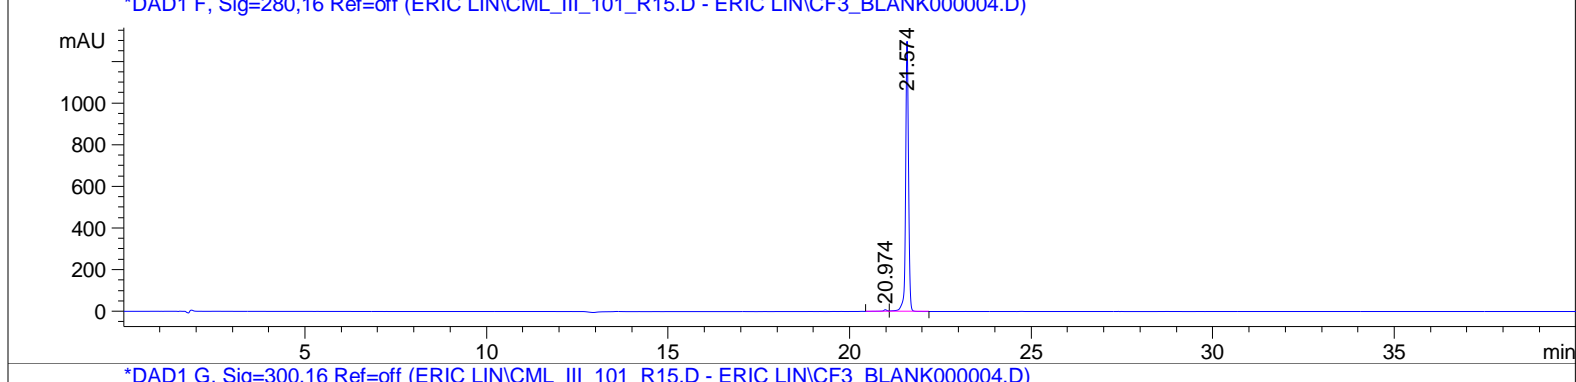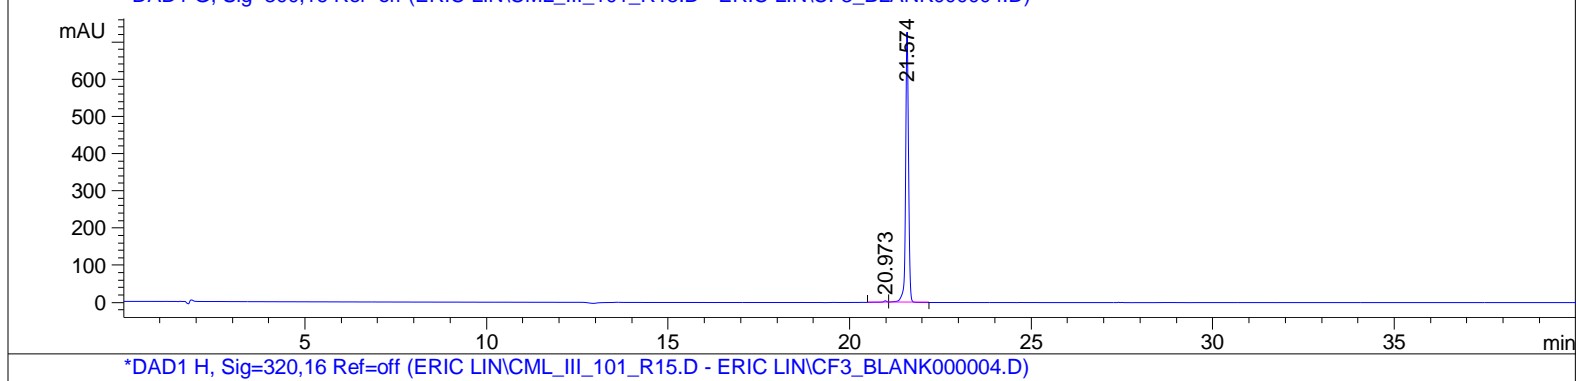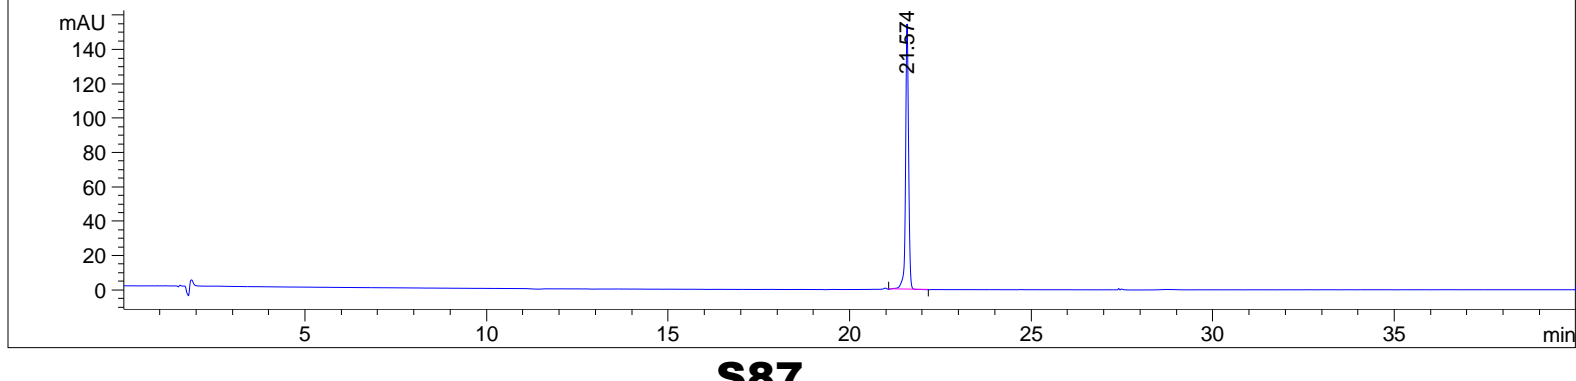

**S87**

Sample Name: CML\_III\_101\_r1

```

=====
                          Area Percent Report
=====

```

```

Sorted By      :      Signal
Multiplier     :      1.0000
Dilution      :      1.0000
Use Multiplier & Dilution Factor with ISTDs

```

Signal 1: DAD1 A, Sig=254,4 Ref=off

Signal has been modified after loading from rawdata file!

| Peak # | RetTime [min] | Type | Width [min] | Area [mAU*s] | Height [mAU] | Area %  |
|--------|---------------|------|-------------|--------------|--------------|---------|
| 1      | 20.974        | BV   | 0.1266      | 162.18532    | 17.74556     | 0.9957  |
| 2      | 21.574        | VB   | 0.0950      | 1.61269e4    | 2649.16064   | 99.0043 |

```
Totals :                      1.62891e4  2666.90621
```

Signal 2: DAD1 B, Sig=254,16 Ref=off

Signal has been modified after loading from rawdata file!

| Peak # | RetTime [min] | Type | Width [min] | Area [mAU*s] | Height [mAU] | Area %  |
|--------|---------------|------|-------------|--------------|--------------|---------|
| 1      | 19.629        | BV   | 0.1434      | 15.67968     | 1.50705      | 0.0984  |
| 2      | 20.325        | BB   | 0.0837      | 7.84197      | 1.48258      | 0.0492  |
| 3      | 20.974        | BV   | 0.1269      | 156.03926    | 17.03149     | 0.9797  |
| 4      | 21.574        | VB   | 0.0944      | 1.57484e4    | 2610.57349   | 98.8727 |

```
Totals :                      1.59279e4  2630.59461
```

Signal 3: DAD1 C, Sig=210,8 Ref=off

Signal has been modified after loading from rawdata file!

| Peak # | RetTime [min] | Type | Width [min] | Area [mAU*s] | Height [mAU] | Area % |
|--------|---------------|------|-------------|--------------|--------------|--------|
| 1      | 1.544         | VB   | 0.1616      | 91.00436     | 7.09602      | 0.3682 |
| 2      | 1.861         | BB   | 0.1195      | 129.13742    | 16.46471     | 0.5225 |
| 3      | 3.605         | BV   | 0.1238      | 19.76291     | 2.22098      | 0.0800 |
| 4      | 3.728         | VB   | 0.1876      | 36.14043     | 2.74495      | 0.1462 |
| 5      | 5.335         | BV   | 0.0699      | 7.31299      | 1.58168      | 0.0296 |
| 6      | 7.374         | BV   | 0.3155      | 131.54974    | 5.77983      | 0.5323 |
| 7      | 7.708         | VB   | 0.1477      | 82.41358     | 8.61145      | 0.3335 |
| 8      | 8.085         | BV   | 0.1492      | 48.02391     | 5.04047      | 0.1943 |
| 9      | 8.293         | VV   | 0.1788      | 82.41489     | 6.46100      | 0.3335 |



| Peak # | RetTime [min] | Type | Width [min] | Area [mAU*s] | Height [mAU] | Area %  |
|--------|---------------|------|-------------|--------------|--------------|---------|
| 10     | 8.484         | VB   | 0.1196      | 28.29939     | 3.60454      | 0.1145  |
| 11     | 8.870         | BB   | 0.1467      | 40.12056     | 4.08138      | 0.1623  |
| 12     | 9.446         | BB   | 0.1206      | 8.52363      | 1.05068      | 0.0345  |
| 13     | 11.062        | BB   | 0.1804      | 111.10935    | 8.28815      | 0.4496  |
| 14     | 17.666        | BV   | 0.1830      | 76.52775     | 5.76194      | 0.3097  |
| 15     | 19.764        | VB   | 0.3768      | 263.92871    | 8.67955      | 1.0680  |
| 16     | 20.324        | BV   | 0.1196      | 57.96089     | 6.93019      | 0.2345  |
| 17     | 20.974        | VV   | 0.1513      | 427.89676    | 38.00670     | 1.7314  |
| 18     | 21.574        | VB   | 0.1296      | 2.29555e4    | 2800.36768   | 92.8875 |
| 19     | 23.149        | BB   | 0.0962      | 46.80672     | 7.35477      | 0.1894  |
| 20     | 23.913        | BB   | 0.1068      | 15.62614     | 2.20080      | 0.0632  |
| 21     | 24.738        | BB   | 0.1166      | 53.17654     | 7.00522      | 0.2152  |

Totals : 2.47132e4 2949.33269

Signal 4: DAD1 D, Sig=230,16 Ref=off

Signal has been modified after loading from rawdata file!

| Peak # | RetTime [min] | Type | Width [min] | Area [mAU*s] | Height [mAU] | Area %  |
|--------|---------------|------|-------------|--------------|--------------|---------|
| 1      | 7.709         | BB   | 0.3239      | 249.13312    | 10.09571     | 1.5249  |
| 2      | 8.086         | BV   | 0.1551      | 57.38152     | 5.81611      | 0.3512  |
| 3      | 8.291         | VV   | 0.1863      | 98.30637     | 7.43379      | 0.6017  |
| 4      | 8.482         | VB   | 0.1140      | 29.62998     | 4.01957      | 0.1814  |
| 5      | 8.868         | BV   | 0.1762      | 75.49585     | 6.10649      | 0.4621  |
| 6      | 9.091         | VV   | 0.1764      | 31.43843     | 2.34578      | 0.1924  |
| 7      | 9.444         | VB   | 0.1488      | 19.71043     | 1.84204      | 0.1206  |
| 8      | 11.062        | BB   | 0.1049      | 24.78027     | 3.57223      | 0.1517  |
| 9      | 13.576        | BB   | 0.5029      | 106.49190    | 2.63814      | 0.6518  |
| 10     | 17.666        | BB   | 0.1714      | 20.12987     | 1.66064      | 0.1232  |
| 11     | 20.974        | BV   | 0.1380      | 173.49957    | 17.14832     | 1.0620  |
| 12     | 21.574        | VB   | 0.0909      | 1.54119e4    | 2608.66772   | 94.3329 |
| 13     | 23.151        | BB   | 0.1007      | 10.27145     | 1.52356      | 0.0629  |
| 14     | 24.737        | BB   | 0.1105      | 29.60491     | 4.18738      | 0.1812  |

Totals : 1.63378e4 2677.05750

Signal 5: DAD1 E, Sig=280,16 Ref=off

Signal has been modified after loading from rawdata file!

| Peak # | RetTime [min] | Type | Width [min] | Area [mAU*s] | Height [mAU] | Area %  |
|--------|---------------|------|-------------|--------------|--------------|---------|
| 1      | 20.974        | BV   | 0.1231      | 72.74569     | 8.22962      | 0.9803  |
| 2      | 21.574        | VB   | 0.0858      | 7347.78955   | 1302.42627   | 99.0197 |

Sample Name: CML\_III\_101\_r1

| Peak #   | RetTime [min] | Type | Width [min] | Area [mAU*s] | Height [mAU] | Area % |
|----------|---------------|------|-------------|--------------|--------------|--------|
| Totals : |               |      |             |              |              |        |
|          |               |      |             | 7420.53524   | 1310.65589   |        |

Signal 6: DAD1 F, Sig=280,16 Ref=off

Signal has been modified after loading from rawdata file!

| Peak #   | RetTime [min] | Type | Width [min] | Area [mAU*s] | Height [mAU] | Area %  |
|----------|---------------|------|-------------|--------------|--------------|---------|
| 1        | 20.974        | BV   | 0.1231      | 72.74569     | 8.22962      | 0.9803  |
| 2        | 21.574        | VB   | 0.0858      | 7347.78955   | 1302.42627   | 99.0197 |
| Totals : |               |      |             |              |              |         |
|          |               |      |             | 7420.53524   | 1310.65589   |         |

Signal 7: DAD1 G, Sig=300,16 Ref=off

Signal has been modified after loading from rawdata file!

| Peak #   | RetTime [min] | Type | Width [min] | Area [mAU*s] | Height [mAU] | Area %  |
|----------|---------------|------|-------------|--------------|--------------|---------|
| 1        | 20.973        | BV   | 0.1175      | 35.49311     | 4.24565      | 0.8536  |
| 2        | 21.574        | VB   | 0.0860      | 4122.53955   | 729.12970    | 99.1464 |
| Totals : |               |      |             |              |              |         |
|          |               |      |             | 4158.03266   | 733.37535    |         |

Signal 8: DAD1 H, Sig=320,16 Ref=off

Signal has been modified after loading from rawdata file!

| Peak #   | RetTime [min] | Type | Width [min] | Area [mAU*s] | Height [mAU] | Area %   |
|----------|---------------|------|-------------|--------------|--------------|----------|
| 1        | 21.574        | BB   | 0.0878      | 901.81482    | 155.12813    | 100.0000 |
| Totals : |               |      |             |              |              |          |
|          |               |      |             | 901.81482    | 155.12813    |          |

=====  
 \*\*\* End of Report \*\*\*

# HRMS for compound 34

C:\Xcalibur\...\CML\_III\_101\_Orbi\_-ESI

3/17/2014 3:21:06 PM

CML\_III\_101

CML\_III\_101\_Orbi\_-ESI #12 RT: 0.09 AV: 1 NL:  
T: FTMS - p ESI Full ms [150.00-2000.00]

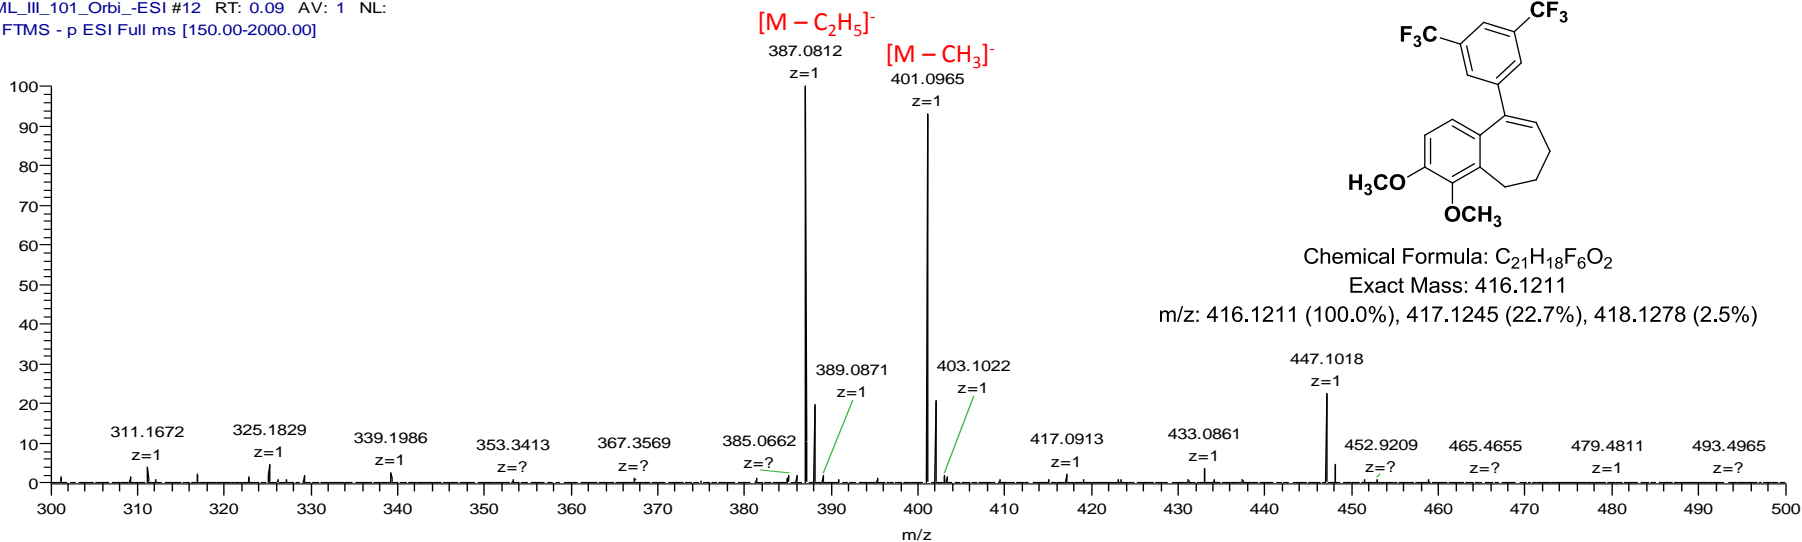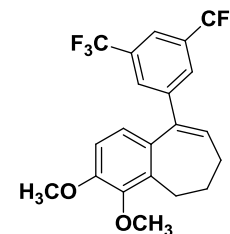

Chemical Formula: C<sub>21</sub>H<sub>18</sub>F<sub>6</sub>O<sub>2</sub>  
Exact Mass: 416.1211  
m/z: 416.1211 (100.0%), 417.1245 (22.7%), 418.1278 (2.5%)

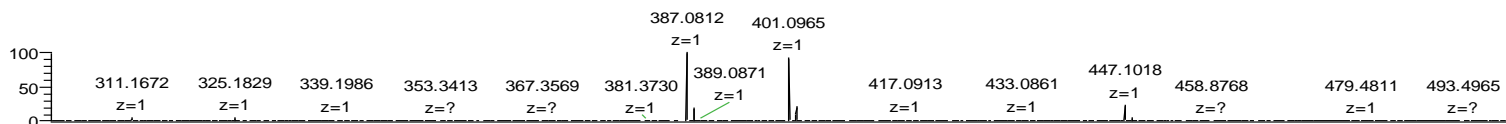

NL:  
3.66E7  
CML\_III\_101\_Orbi\_-ESI#12 RT:  
0.09 AV: 1 T: FTMS - p ESI Full  
ms [150.00-2000.00]

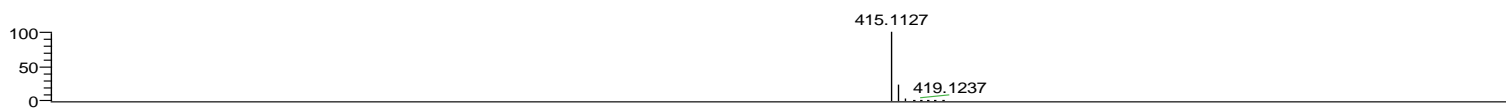

NL:  
7.92E5  
C<sub>21</sub>H<sub>17</sub>F<sub>6</sub>O<sub>2</sub>:  
C<sub>21</sub>H<sub>17</sub>F<sub>6</sub>O<sub>2</sub>  
pa Chrg 1

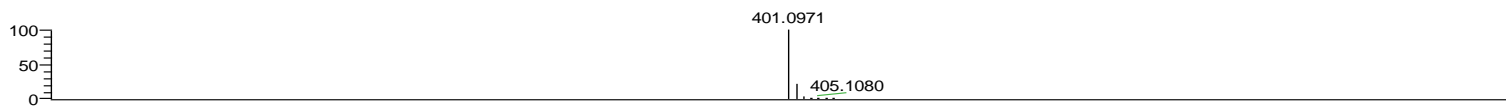

NL:  
8.01E5  
C<sub>20</sub>H<sub>15</sub>F<sub>6</sub>O<sub>2</sub>:  
C<sub>20</sub>H<sub>15</sub>F<sub>6</sub>O<sub>2</sub>  
pa Chrg 1

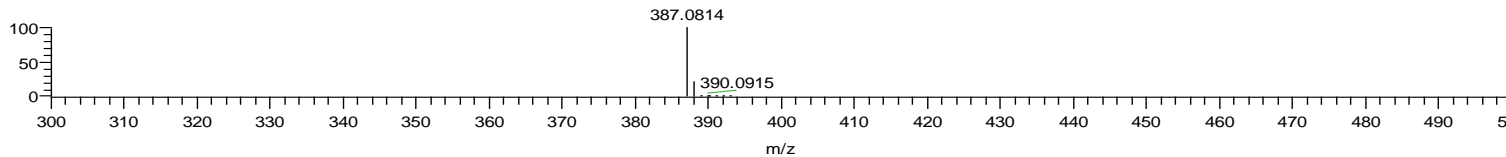

NL:  
8.10E5  
C<sub>19</sub>H<sub>13</sub>F<sub>6</sub>O<sub>2</sub>:  
C<sub>19</sub>H<sub>13</sub>F<sub>6</sub>O<sub>2</sub>  
pa Chrg 1

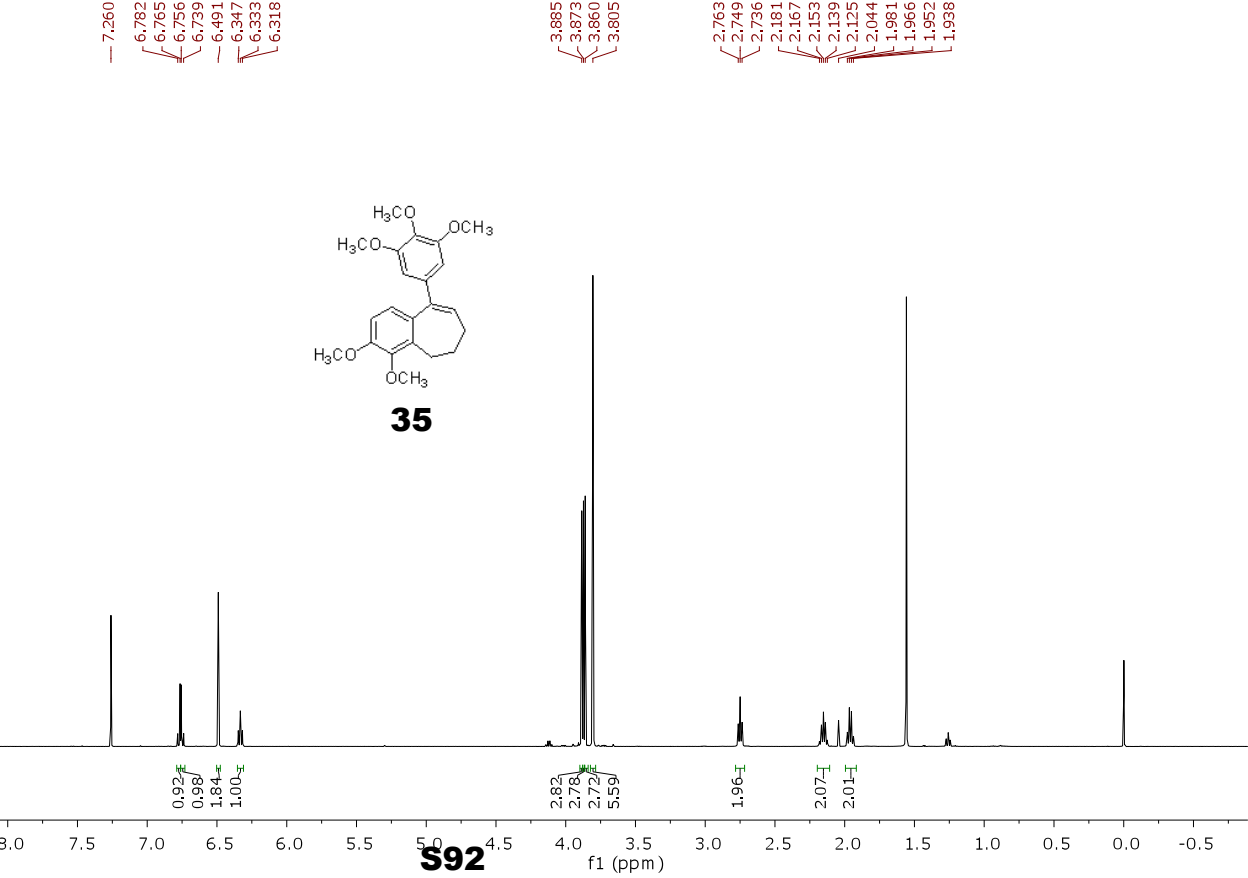

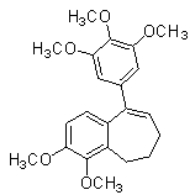

**35**

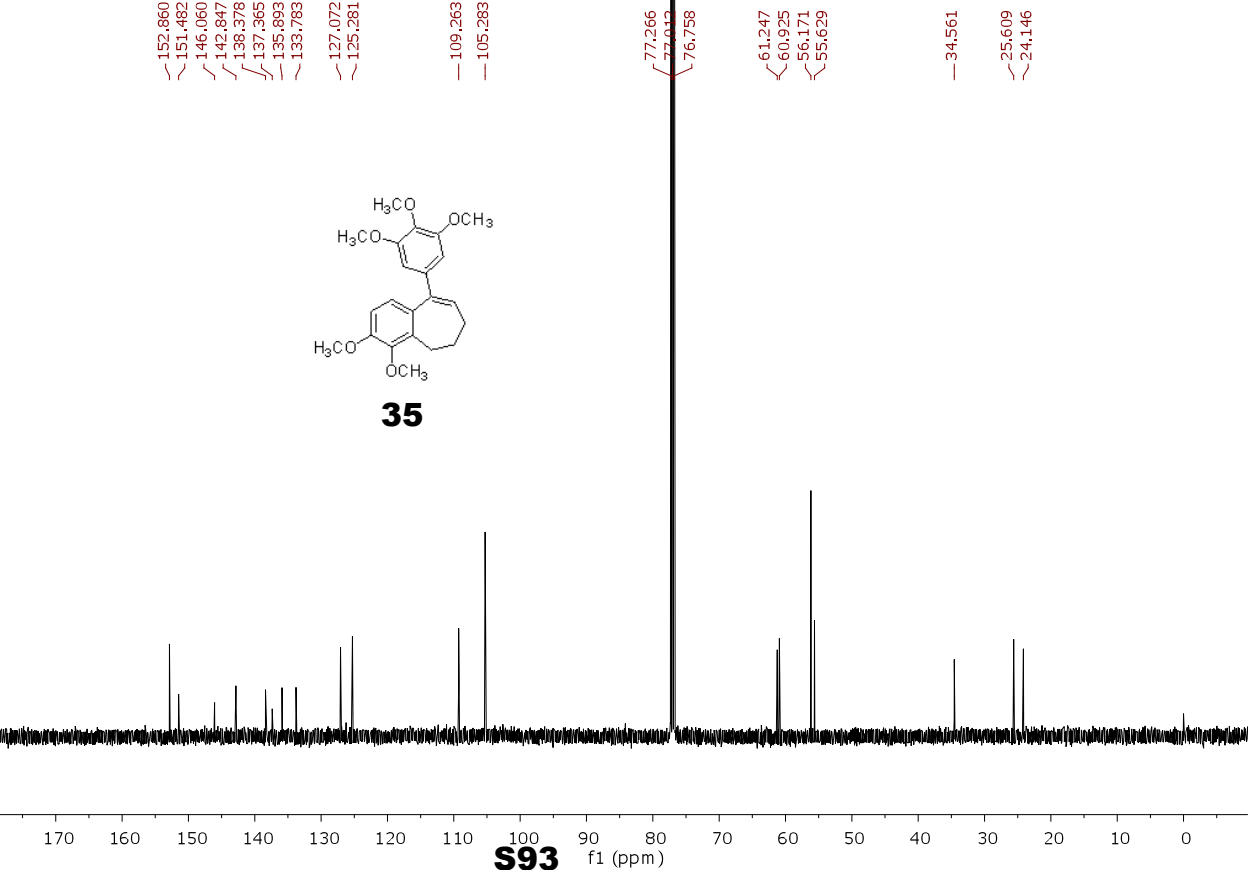

# HPLC for compound 35

=====

Acq. Operator : Laxman  
Acq. Instrument : Instrument 1 Location : -  
Injection Date : 1/28/2014 4:36:52 PM  
Acq. Method : C:\CHEM32\1\METHODS\MASTERMETHOD.M  
Last changed : 1/28/2014 4:31:37 PM by Laxman  
Analysis Method : C:\CHEM32\1\DATA\LAXMAN\LDIV53-1RUN2002.D\DA.M (MASTERMETHOD.M)  
Last changed : 1/28/2014 5:32:55 PM by Laxman  
Sample Info : run2

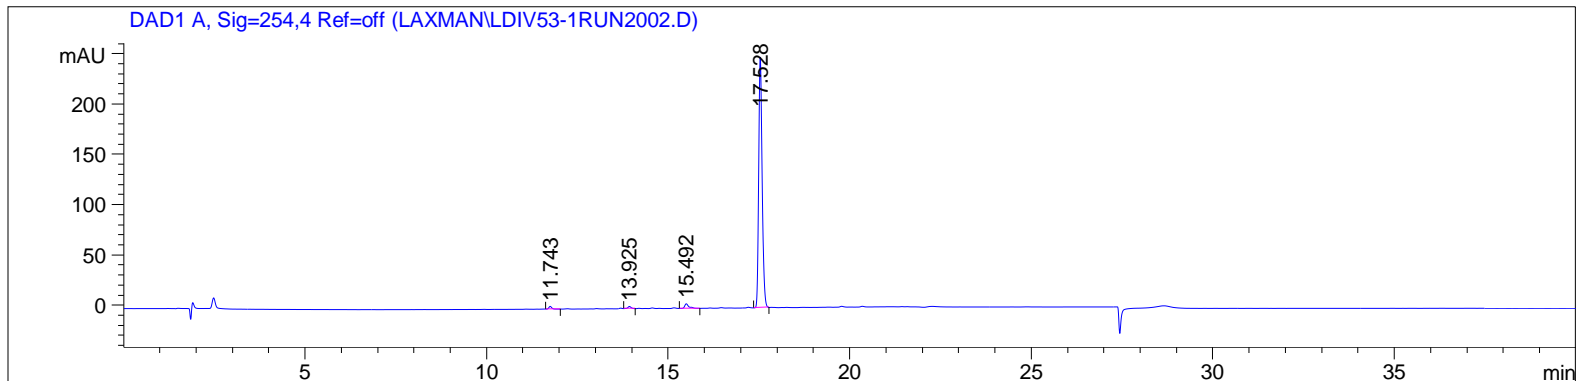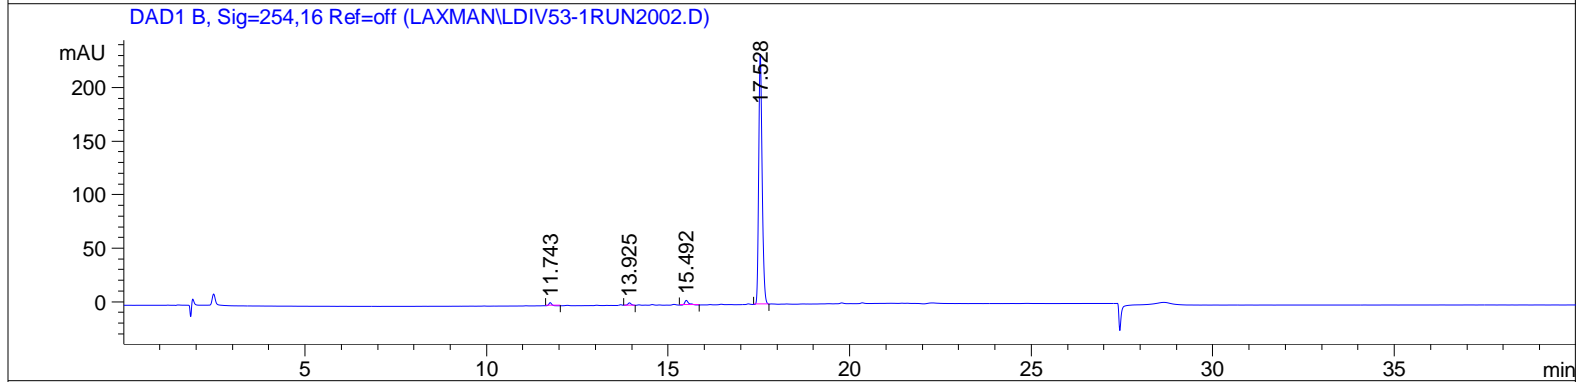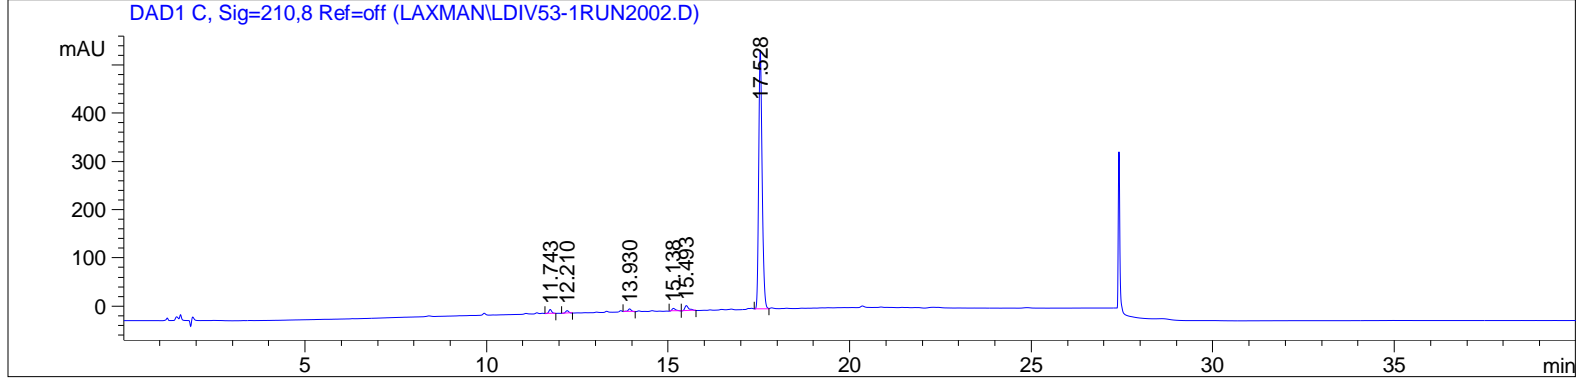

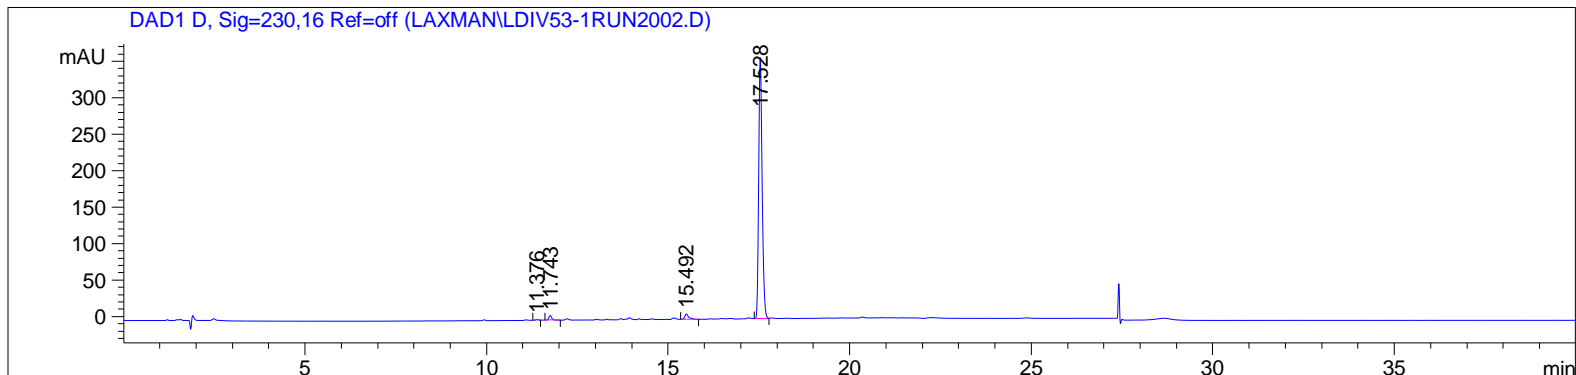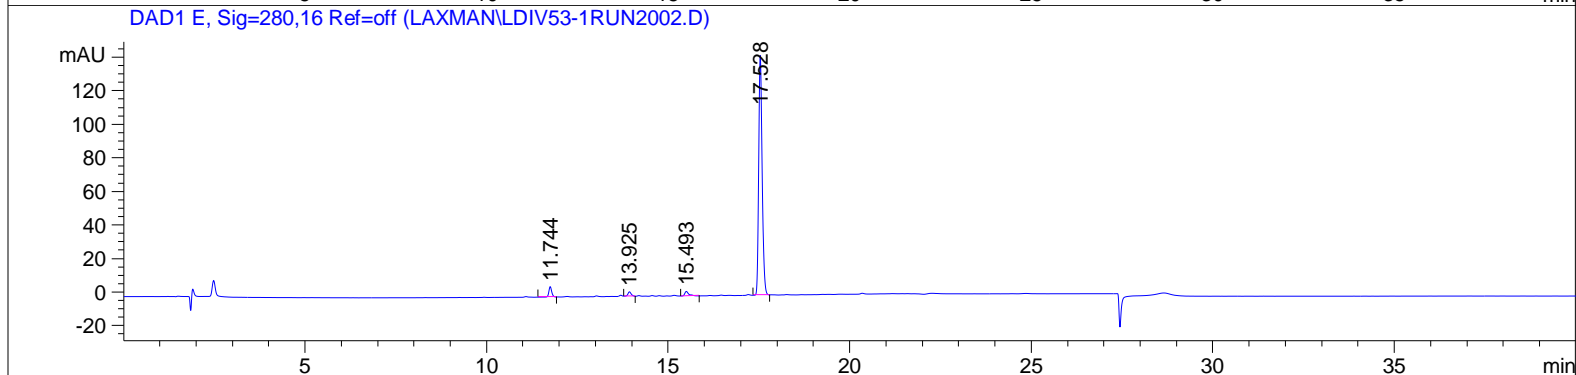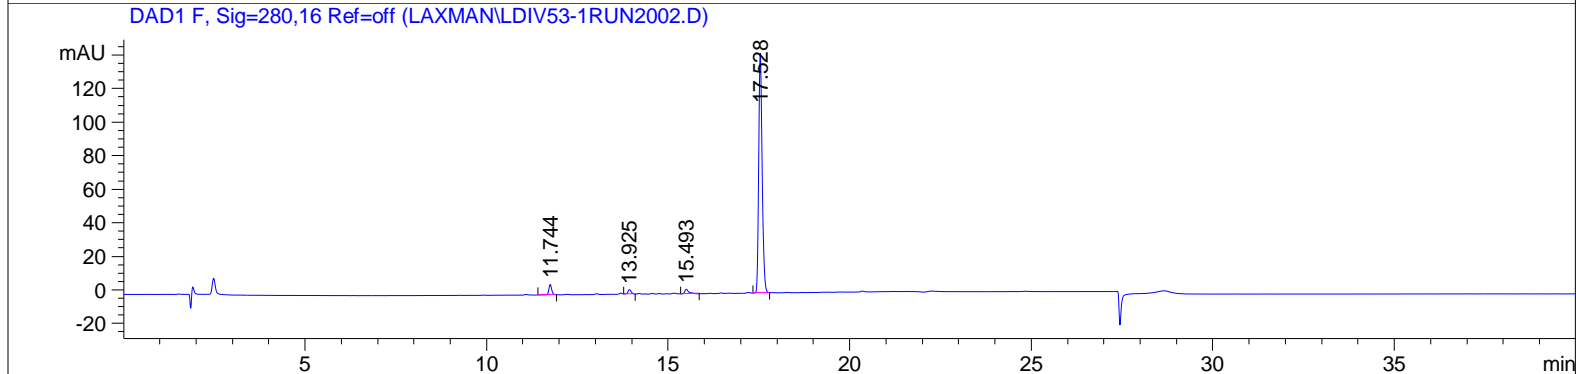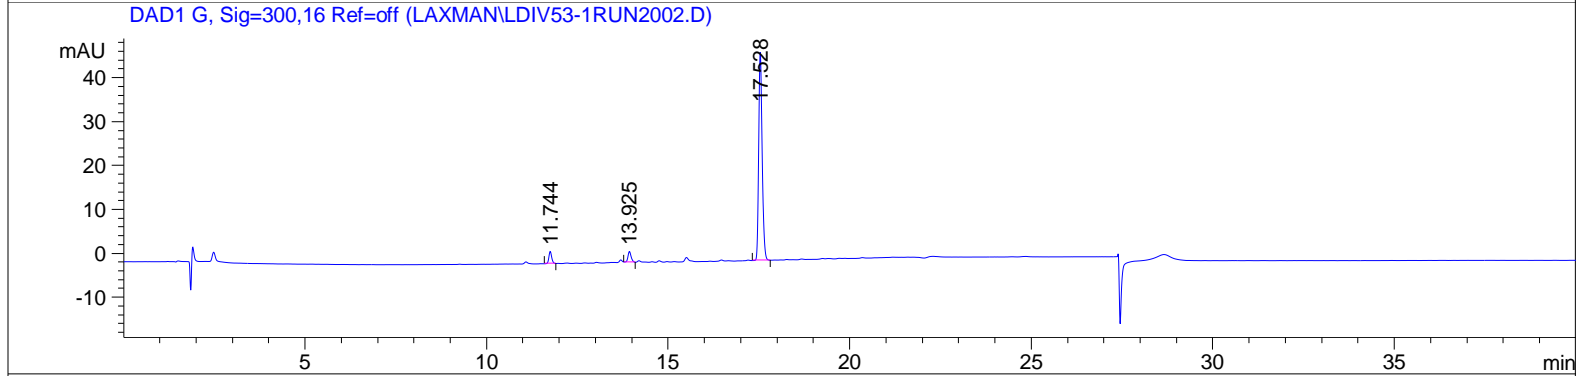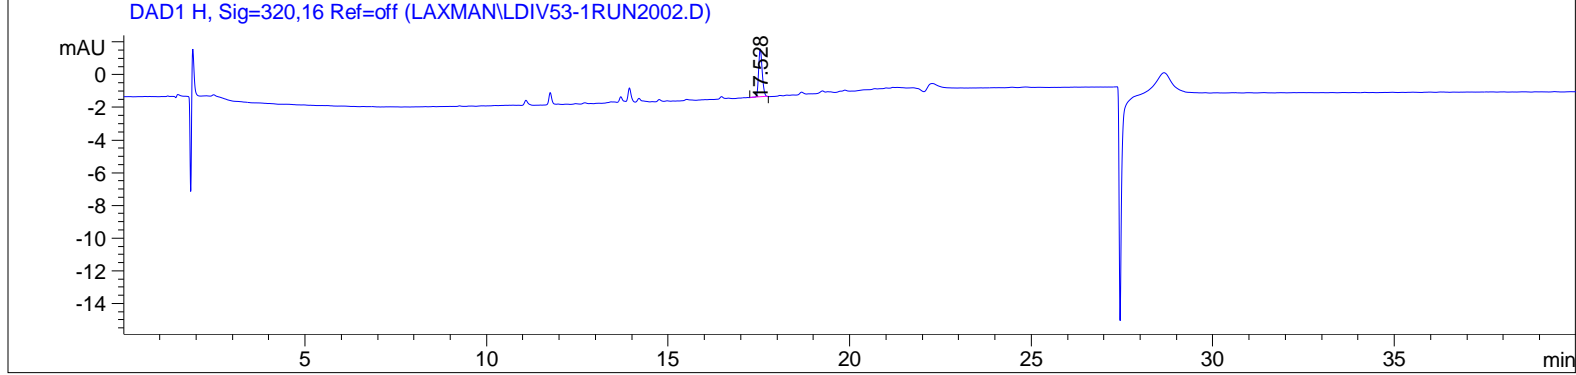

=====  
Area Percent Report  
=====

Sorted By : Signal  
Multiplier : 1.0000  
Dilution : 1.0000  
Use Multiplier & Dilution Factor with ISTDs

Signal 1: DAD1 A, Sig=254,4 Ref=off

| Peak # | RetTime [min] | Type | Width [min] | Area [mAU*s] | Height [mAU] | Area %  |
|--------|---------------|------|-------------|--------------|--------------|---------|
| 1      | 11.743        | BB   | 0.0826      | 14.26201     | 2.65778      | 0.8361  |
| 2      | 13.925        | BB   | 0.0929      | 13.40179     | 2.14591      | 0.7857  |
| 3      | 15.492        | BB   | 0.1162      | 36.18954     | 4.57916      | 2.1215  |
| 4      | 17.528        | BB   | 0.1009      | 1641.95728   | 249.16393    | 96.2567 |

Totals : 1705.81062 258.54678

Signal 2: DAD1 B, Sig=254,16 Ref=off

| Peak # | RetTime [min] | Type | Width [min] | Area [mAU*s] | Height [mAU] | Area %  |
|--------|---------------|------|-------------|--------------|--------------|---------|
| 1      | 11.743        | BB   | 0.0825      | 15.31448     | 2.85651      | 0.9551  |
| 2      | 13.925        | BB   | 0.0930      | 13.93967     | 2.22854      | 0.8693  |
| 3      | 15.492        | BB   | 0.1162      | 34.20804     | 4.32975      | 2.1333  |
| 4      | 17.528        | BB   | 0.1009      | 1540.03906   | 233.65747    | 96.0423 |

Totals : 1603.50126 243.07228

Signal 3: DAD1 C, Sig=210,8 Ref=off

| Peak # | RetTime [min] | Type | Width [min] | Area [mAU*s] | Height [mAU] | Area %  |
|--------|---------------|------|-------------|--------------|--------------|---------|
| 1      | 11.743        | VB   | 0.0846      | 46.10949     | 8.32722      | 1.2122  |
| 2      | 12.210        | BB   | 0.0942      | 31.44279     | 5.22819      | 0.8266  |
| 3      | 13.930        | VB   | 0.1058      | 44.68492     | 6.07767      | 1.1747  |
| 4      | 15.138        | BB   | 0.1074      | 40.66746     | 5.55600      | 1.0691  |
| 5      | 15.493        | BB   | 0.1166      | 84.69407     | 10.67318     | 2.2265  |
| 6      | 17.528        | VV   | 0.1012      | 3556.32837   | 537.31000    | 93.4910 |

Totals : 3803.92710 573.17226

**S96**



Signal 4: DAD1 D, Sig=230,16 Ref=off

| Peak # | RetTime [min] | Type | Width [min] | Area [mAU*s] | Height [mAU] | Area %  |
|--------|---------------|------|-------------|--------------|--------------|---------|
| 1      | 11.376        | BB   | 0.0778      | 5.07398      | 1.02429      | 0.2062  |
| 2      | 11.743        | BB   | 0.0837      | 34.19037     | 6.25711      | 1.3895  |
| 3      | 15.492        | VB   | 0.1148      | 57.49661     | 7.38936      | 2.3366  |
| 4      | 17.528        | VV   | 0.1010      | 2363.93970   | 358.03088    | 96.0677 |

Totals : 2460.70065 372.70165

Signal 5: DAD1 E, Sig=280,16 Ref=off

| Peak # | RetTime [min] | Type | Width [min] | Area [mAU*s] | Height [mAU] | Area %  |
|--------|---------------|------|-------------|--------------|--------------|---------|
| 1      | 11.744        | BB   | 0.0836      | 33.69853     | 6.18095      | 3.3237  |
| 2      | 13.925        | BB   | 0.0929      | 16.22744     | 2.59767      | 1.6005  |
| 3      | 15.493        | BB   | 0.1161      | 21.33865     | 2.70186      | 2.1046  |
| 4      | 17.528        | BB   | 0.1010      | 942.63556    | 142.84668    | 92.9712 |

Totals : 1013.90018 154.32717

Signal 6: DAD1 F, Sig=280,16 Ref=off

| Peak # | RetTime [min] | Type | Width [min] | Area [mAU*s] | Height [mAU] | Area %  |
|--------|---------------|------|-------------|--------------|--------------|---------|
| 1      | 11.744        | BB   | 0.0836      | 33.69853     | 6.18095      | 3.3237  |
| 2      | 13.925        | BB   | 0.0929      | 16.22744     | 2.59767      | 1.6005  |
| 3      | 15.493        | BB   | 0.1161      | 21.33865     | 2.70186      | 2.1046  |
| 4      | 17.528        | BB   | 0.1010      | 942.63556    | 142.84668    | 92.9712 |

Totals : 1013.90018 154.32717

Signal 7: DAD1 G, Sig=300,16 Ref=off

| Peak # | RetTime [min] | Type | Width [min] | Area [mAU*s] | Height [mAU] | Area %  |
|--------|---------------|------|-------------|--------------|--------------|---------|
| 1      | 11.744        | BB   | 0.0831      | 15.00270     | 2.77378      | 4.3629  |
| 2      | 13.925        | BB   | 0.0900      | 14.52386     | 2.41986      | 4.2237  |
| 3      | 17.528        | BB   | 0.1013      | 314.33951    | 47.44872     | 91.4134 |

Totals : 343.86607 52.64236

Signal 8: DAD1 H, Sig=320,16 Ref=off

| Peak # | RetTime [min] | Type | Width [min] | Area [mAU*s] | Height [mAU] | Area %   |
|--------|---------------|------|-------------|--------------|--------------|----------|
| 1      | 17.528        | BB   | 0.1072      | 20.50176     | 2.94557      | 100.0000 |

Totals :                                   20.50176     2.94557

=====  
\*\*\* End of Report \*\*\*

**S98**

# HRMS for compound 35

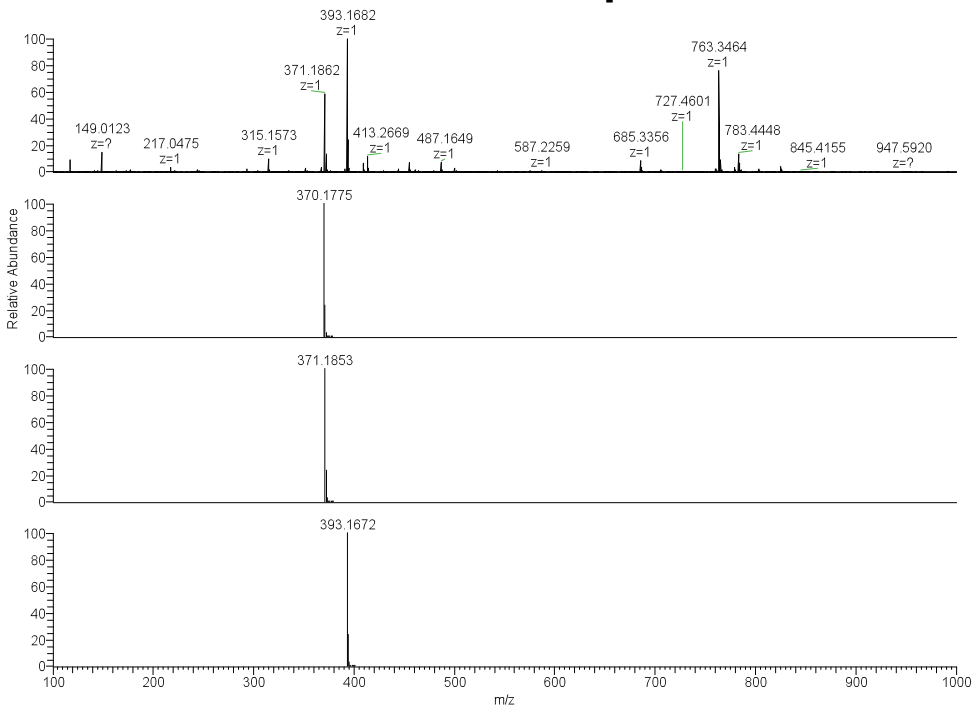

NL:  
3.83E8  
LD-III-53-1A-  
run1\_Orbi\_+ESI#11  
RT: 0.10 AV: 1 T:  
FTMS + p ESI Full ms  
[100.00-1000.00]

NL:  
7.77E5

C<sub>22</sub>H<sub>26</sub>O<sub>5</sub>  
C<sub>22</sub>H<sub>26</sub>O<sub>5</sub>  
pa Chrg 1

NL:  
7.77E5

C<sub>22</sub>H<sub>26</sub>O<sub>5</sub>+H  
C<sub>22</sub>H<sub>27</sub>O<sub>5</sub>  
pa Chrg 1

NL:  
7.77E5

C<sub>22</sub>H<sub>26</sub>O<sub>5</sub>+Na  
C<sub>22</sub>H<sub>26</sub>O<sub>5</sub>Na<sub>1</sub>  
pa Chrg 1

**S99**

7.183  
7.165  
6.881  
6.874  
6.864  
6.856  
6.717  
6.700  
6.313  
6.298  
6.284

3.888  
3.850  
3.814  
3.336

2.753  
2.739  
2.725  
2.178  
2.163  
2.149  
2.135  
2.121  
1.962  
1.947  
1.933  
1.918

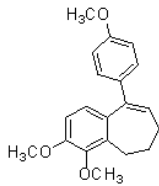

**36**

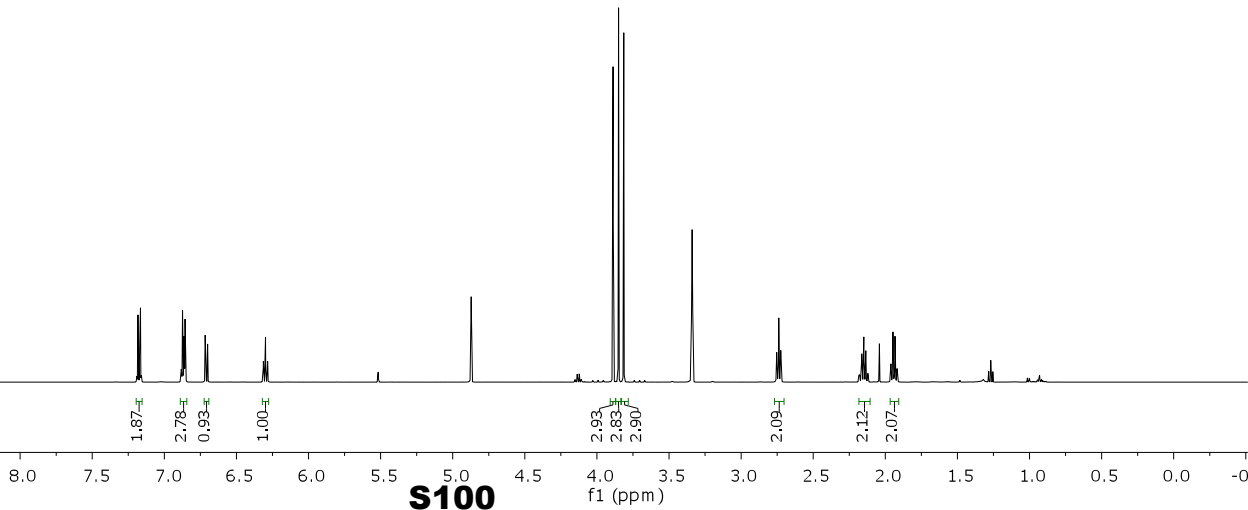

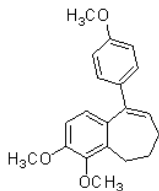

**36**

158.783  
151.337  
146.080  
142.195

135.883  
135.226  
134.344  
128.985  
125.896  
125.014

113.457  
109.231

77.242 cdd3  
76.988 cdd3  
76.734 cdd3

61.181  
55.621  
55.280

34.561

25.490  
24.039

**S101** f1 (ppm)

# HPLC for compound 36

=====  
Acq. Operator : Laxman  
Acq. Instrument : Instrument 1 Location : -  
Injection Date : 1/30/2014 10:16:04 AM  
Acq. Method : C:\CHEM32\1\METHODS\MASTERMETHOD.M  
Last changed : 1/30/2014 9:43:27 AM by Laxman  
Analysis Method : C:\CHEM32\1\METHODS\MASTERMETHOD.M  
Last changed : 1/30/2014 11:06:05 AM by Laxman  
Sample Info : Run1

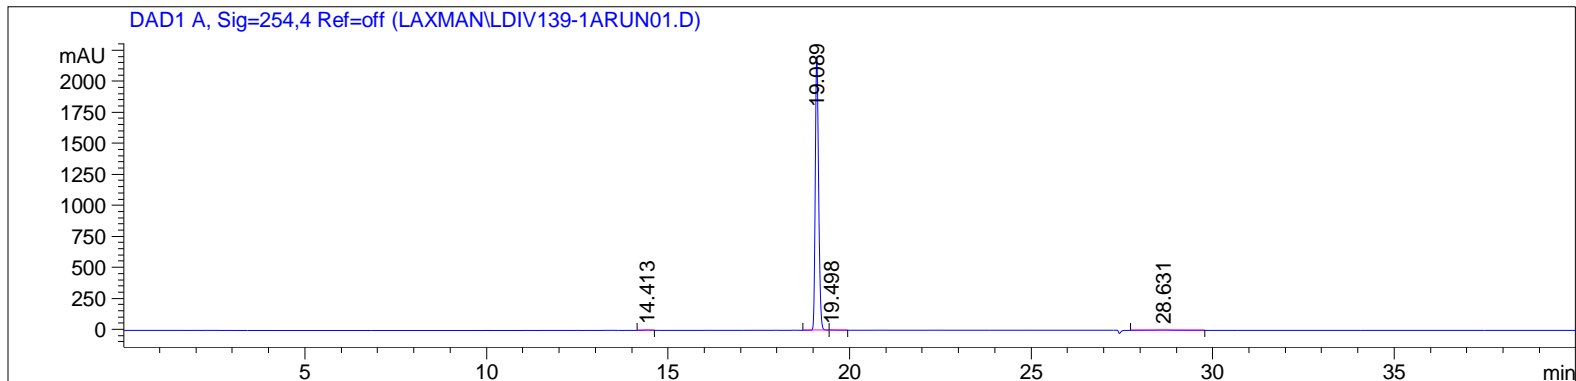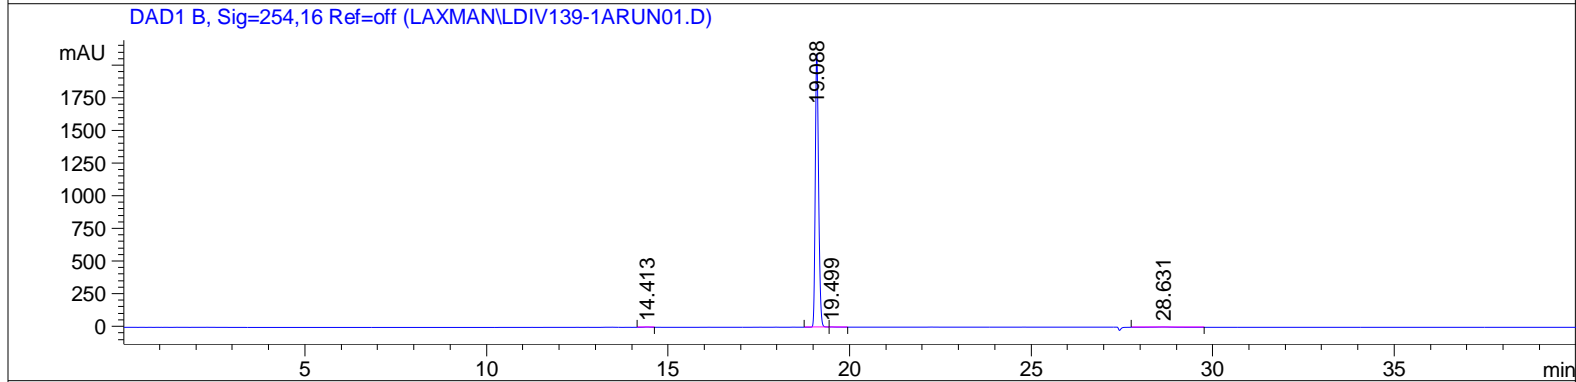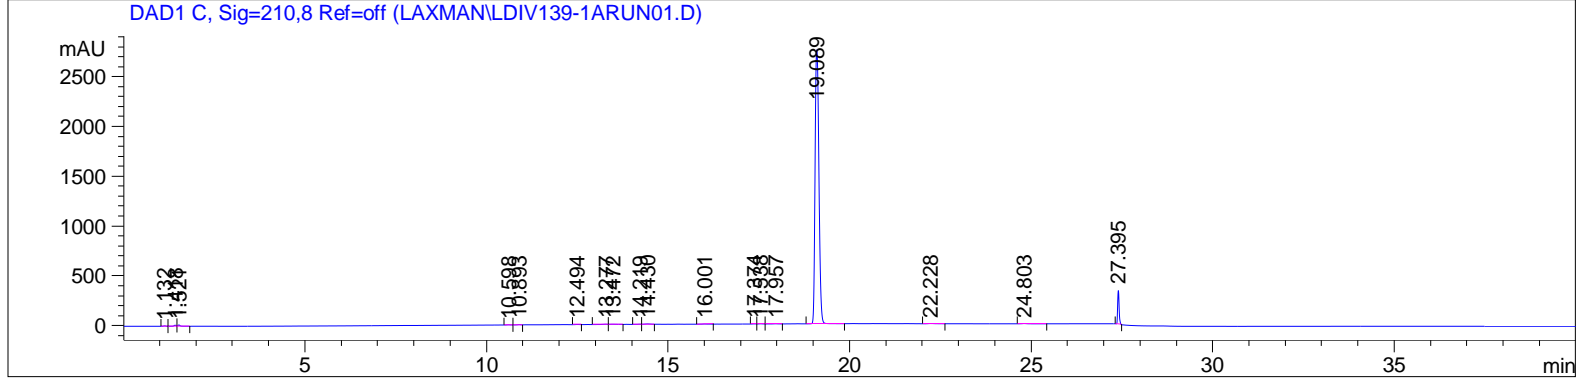

**S102**

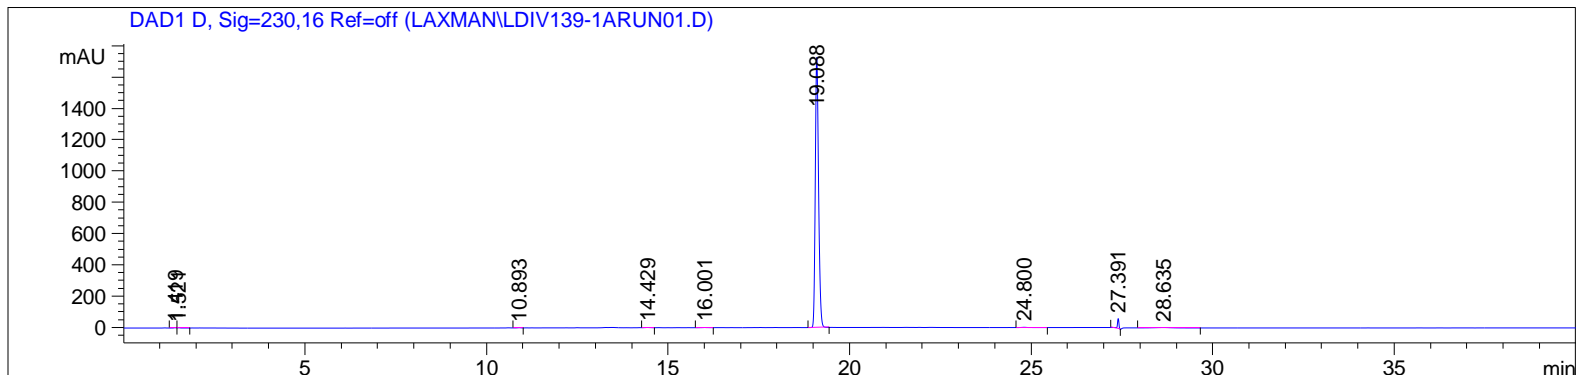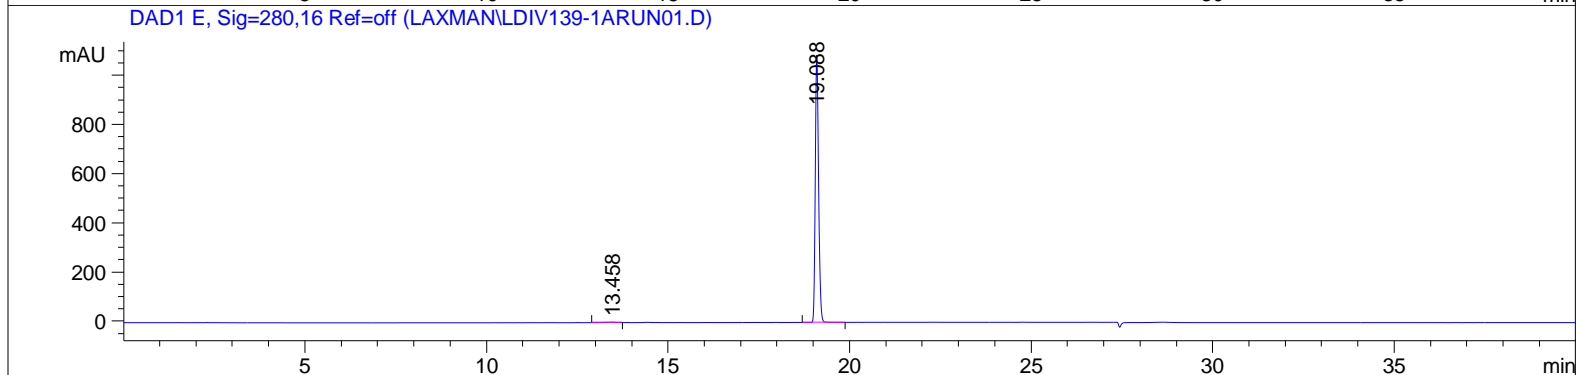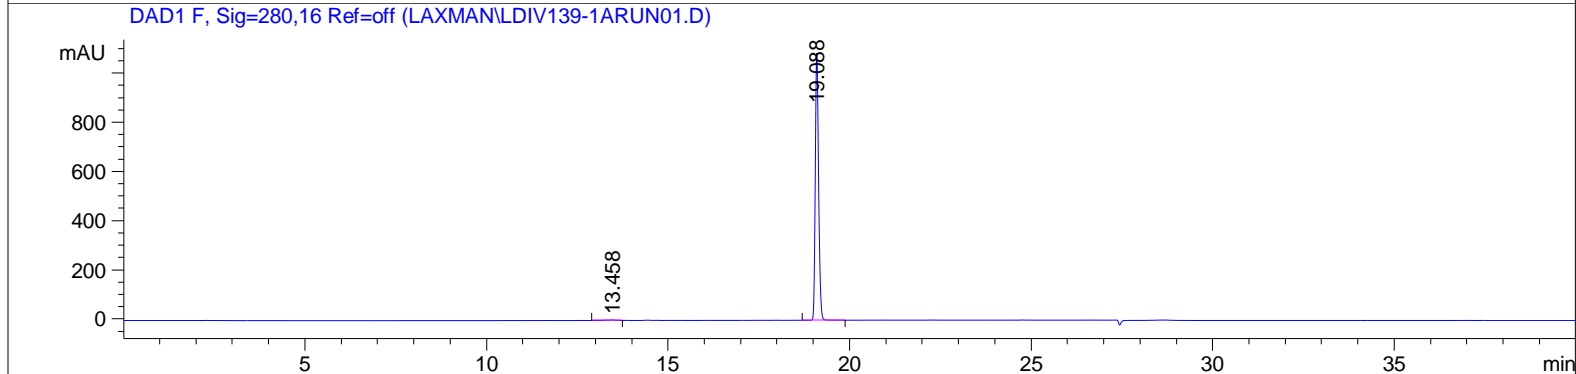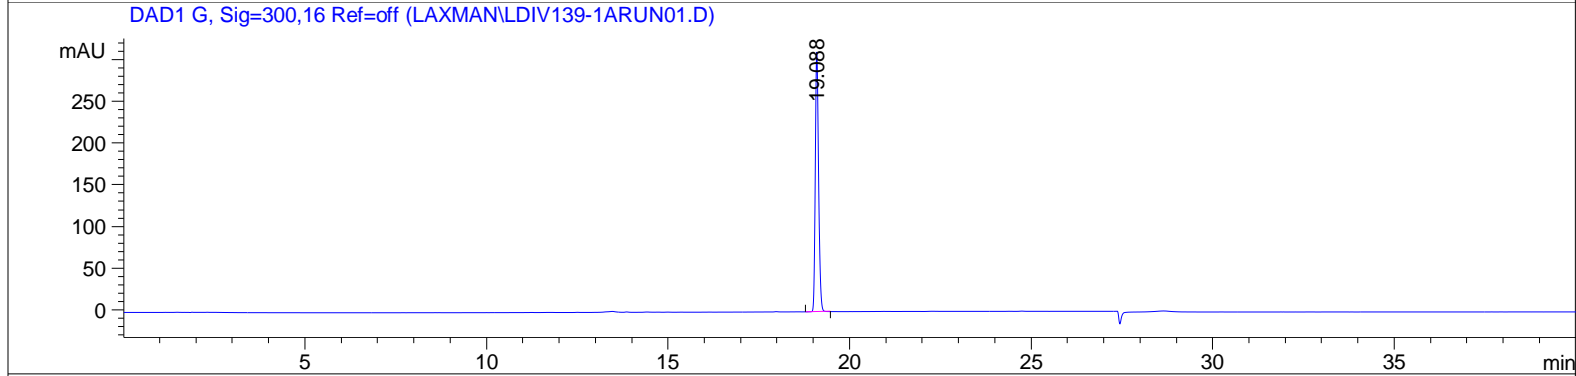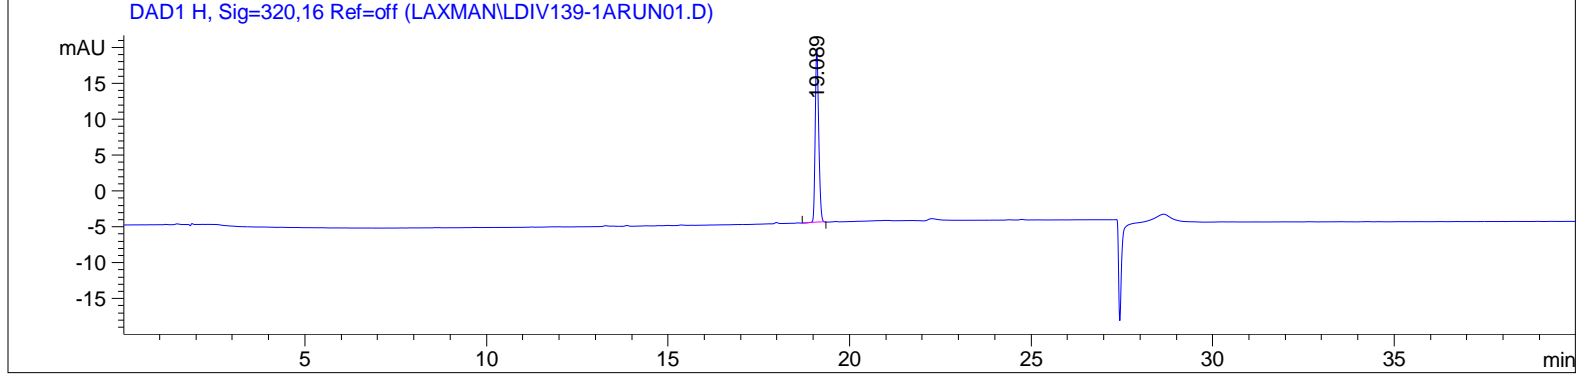

=====  
Area Percent Report  
=====

Sorted By : Signal  
Multiplier : 1.0000  
Dilution : 1.0000  
Use Multiplier & Dilution Factor with ISTDs

Signal 1: DAD1 A, Sig=254,4 Ref=off

| Peak # | RetTime [min] | Type | Width [min] | Area [mAU*s] | Height [mAU] | Area %  |
|--------|---------------|------|-------------|--------------|--------------|---------|
| 1      | 14.413        | BB   | 0.1604      | 21.42000     | 2.07520      | 0.1499  |
| 2      | 19.089        | BV   | 0.0989      | 1.41765e4    | 2207.01196   | 99.1916 |
| 3      | 19.498        | VB   | 0.1340      | 18.92470     | 1.93655      | 0.1324  |
| 4      | 28.631        | BB   | 0.4860      | 75.18730     | 2.19272      | 0.5261  |

Totals : 1.42921e4 2213.21642

Signal 2: DAD1 B, Sig=254,16 Ref=off

| Peak # | RetTime [min] | Type | Width [min] | Area [mAU*s] | Height [mAU] | Area %  |
|--------|---------------|------|-------------|--------------|--------------|---------|
| 1      | 14.413        | BB   | 0.1601      | 19.95540     | 1.93899      | 0.1477  |
| 2      | 19.088        | BV   | 0.0986      | 1.34034e4    | 2097.21265   | 99.1985 |
| 3      | 19.499        | VB   | 0.1348      | 17.67035     | 1.79536      | 0.1308  |
| 4      | 28.631        | BB   | 0.4580      | 70.67089     | 2.11384      | 0.5230  |

Totals : 1.35117e4 2103.06084

Signal 3: DAD1 C, Sig=210,8 Ref=off

| Peak # | RetTime [min] | Type | Width [min] | Area [mAU*s] | Height [mAU] | Area % |
|--------|---------------|------|-------------|--------------|--------------|--------|
| 1      | 1.132         | BB   | 0.0614      | 14.57730     | 3.58883      | 0.0679 |
| 2      | 1.418         | BV   | 0.0759      | 48.01664     | 10.02032     | 0.2238 |
| 3      | 1.521         | VB   | 0.0610      | 54.63629     | 13.01121     | 0.2547 |
| 4      | 10.598        | BB   | 0.0938      | 8.46140      | 1.41429      | 0.0394 |
| 5      | 10.893        | BB   | 0.0874      | 14.87960     | 2.57484      | 0.0694 |
| 6      | 12.494        | BB   | 0.1000      | 8.76446      | 1.38110      | 0.0409 |
| 7      | 13.277        | BV   | 0.1336      | 24.42828     | 2.55433      | 0.1139 |
| 8      | 13.472        | VV   | 0.2102      | 32.02443     | 2.02785      | 0.1493 |
| 9      | 14.219        | BV   | 0.0878      | 7.31985      | 1.29744      | 0.0341 |
| 10     | 14.430        | VB   | 0.1658      | 35.88203     | 3.38270      | 0.1673 |

**S104**



Sample Name: LD-IV-139-1A-1

| Peak # | RetTime [min] | Type | Width [min] | Area [mAU*s] | Height [mAU] | Area %  |
|--------|---------------|------|-------------|--------------|--------------|---------|
| 11     | 16.001        | BB   | 0.1367      | 17.37272     | 1.73647      | 0.0810  |
| 12     | 17.374        | BV   | 0.0930      | 7.81489      | 1.32111      | 0.0364  |
| 13     | 17.538        | VB   | 0.0939      | 12.18892     | 1.97756      | 0.0568  |
| 14     | 17.957        | BB   | 0.1325      | 13.73361     | 1.53351      | 0.0640  |
| 15     | 19.089        | BB   | 0.1154      | 2.01518e4    | 2751.83130   | 93.9339 |
| 16     | 22.228        | BB   | 0.1848      | 28.84549     | 2.29175      | 0.1345  |
| 17     | 24.803        | BB   | 0.1325      | 21.64288     | 2.41514      | 0.1009  |
| 18     | 27.395        | BB   | 0.0445      | 950.77936    | 341.76141    | 4.4319  |

Totals : 2.14531e4 3146.12117

Signal 4: DAD1 D, Sig=230,16 Ref=off

| Peak # | RetTime [min] | Type | Width [min] | Area [mAU*s] | Height [mAU] | Area %  |
|--------|---------------|------|-------------|--------------|--------------|---------|
| 1      | 1.419         | BV   | 0.0785      | 8.55047      | 1.64809      | 0.0759  |
| 2      | 1.521         | VB   | 0.0891      | 11.86712     | 1.79461      | 0.1053  |
| 3      | 10.893        | BB   | 0.0867      | 7.44412      | 1.30266      | 0.0661  |
| 4      | 14.429        | VB   | 0.1630      | 15.97235     | 1.53950      | 0.1418  |
| 5      | 16.001        | BB   | 0.1503      | 12.82694     | 1.16594      | 0.1138  |
| 6      | 19.088        | BB   | 0.0976      | 1.09185e4    | 1729.82043   | 96.9030 |
| 7      | 24.800        | BB   | 0.1450      | 15.16185     | 1.53794      | 0.1346  |
| 8      | 27.391        | BB   | 0.0488      | 207.03316    | 65.66882     | 1.8374  |
| 9      | 28.635        | BB   | 0.4285      | 70.09544     | 2.34659      | 0.6221  |

Totals : 1.12674e4 1806.82458

Signal 5: DAD1 E, Sig=280,16 Ref=off

| Peak # | RetTime [min] | Type | Width [min] | Area [mAU*s] | Height [mAU] | Area %  |
|--------|---------------|------|-------------|--------------|--------------|---------|
| 1      | 13.458        | BB   | 0.2502      | 33.25743     | 1.77782      | 0.4806  |
| 2      | 19.088        | BB   | 0.0978      | 6887.35742   | 1088.69373   | 99.5194 |

Totals : 6920.61486 1090.47154

Signal 6: DAD1 F, Sig=280,16 Ref=off

# S105

Sample Name: LD-IV-139-1A-1

| Peak # | RetTime [min] | Type | Width [min] | Area [mAU*s] | Height [mAU] | Area %  |
|--------|---------------|------|-------------|--------------|--------------|---------|
| 1      | 13.458        | BB   | 0.2502      | 33.25743     | 1.77782      | 0.4806  |
| 2      | 19.088        | BB   | 0.0978      | 6887.35742   | 1088.69373   | 99.5194 |

Totals : 6920.61486 1090.47154

Signal 7: DAD1 G, Sig=300,16 Ref=off

| Peak # | RetTime [min] | Type | Width [min] | Area [mAU*s] | Height [mAU] | Area %   |
|--------|---------------|------|-------------|--------------|--------------|----------|
| 1      | 19.088        | BB   | 0.0978      | 1975.91748   | 312.50003    | 100.0000 |

Totals : 1975.91748 312.50003

Signal 8: DAD1 H, Sig=320,16 Ref=off

| Peak # | RetTime [min] | Type | Width [min] | Area [mAU*s] | Height [mAU] | Area %   |
|--------|---------------|------|-------------|--------------|--------------|----------|
| 1      | 19.089        | BB   | 0.1021      | 162.21338    | 24.24150     | 100.0000 |

Totals : 162.21338 24.24150

=====  
\*\*\* End of Report \*\*\*

# HRMS for Compound 36

NL:  
2.06E8  
LD-IV-139-1A-Orbi  
+ESI#10 R1: 0.09 AV:  
1 T; FTMS + p ESI  
sid=35.00 Full ms  
[100.00-1000.00]

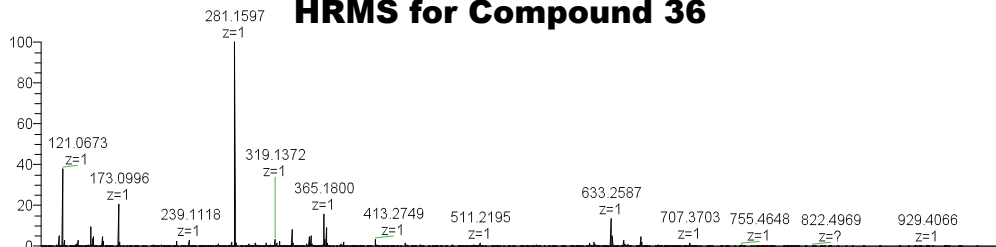

NL:  
8.09E5  
C<sub>19</sub>H<sub>20</sub>O<sub>2</sub>:  
C<sub>19</sub>H<sub>20</sub>O<sub>2</sub>  
pa Chrg 1

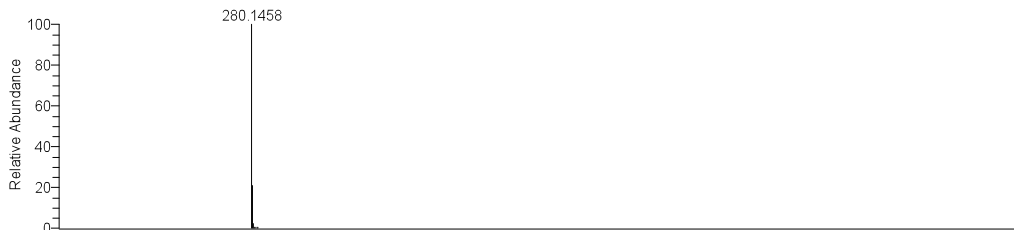

NL:  
8.09E5  
C<sub>19</sub>H<sub>20</sub>O<sub>2</sub> +H:  
C<sub>19</sub>H<sub>21</sub>O<sub>2</sub>  
pa Chrg 1

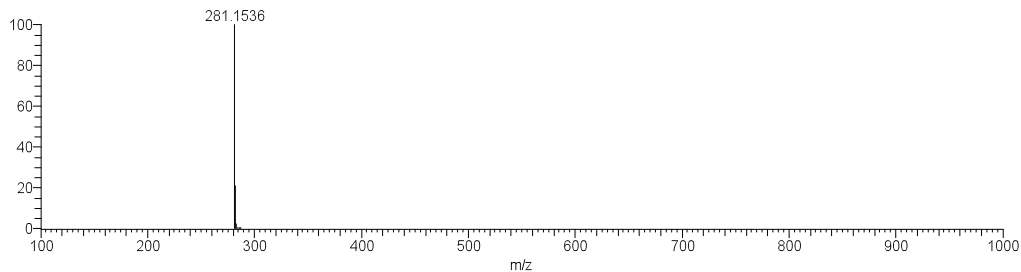

**S107**

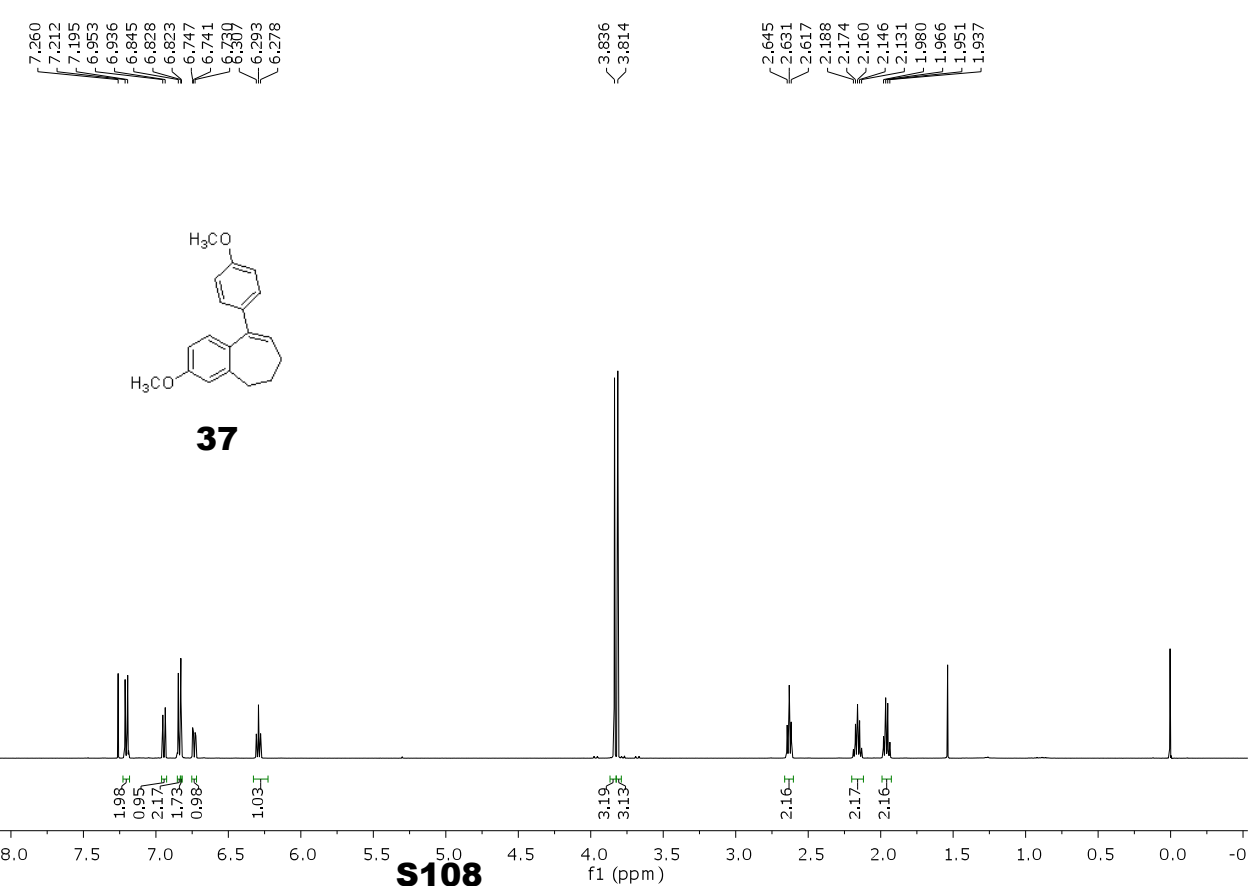

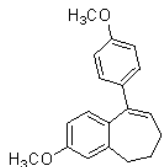

**37**

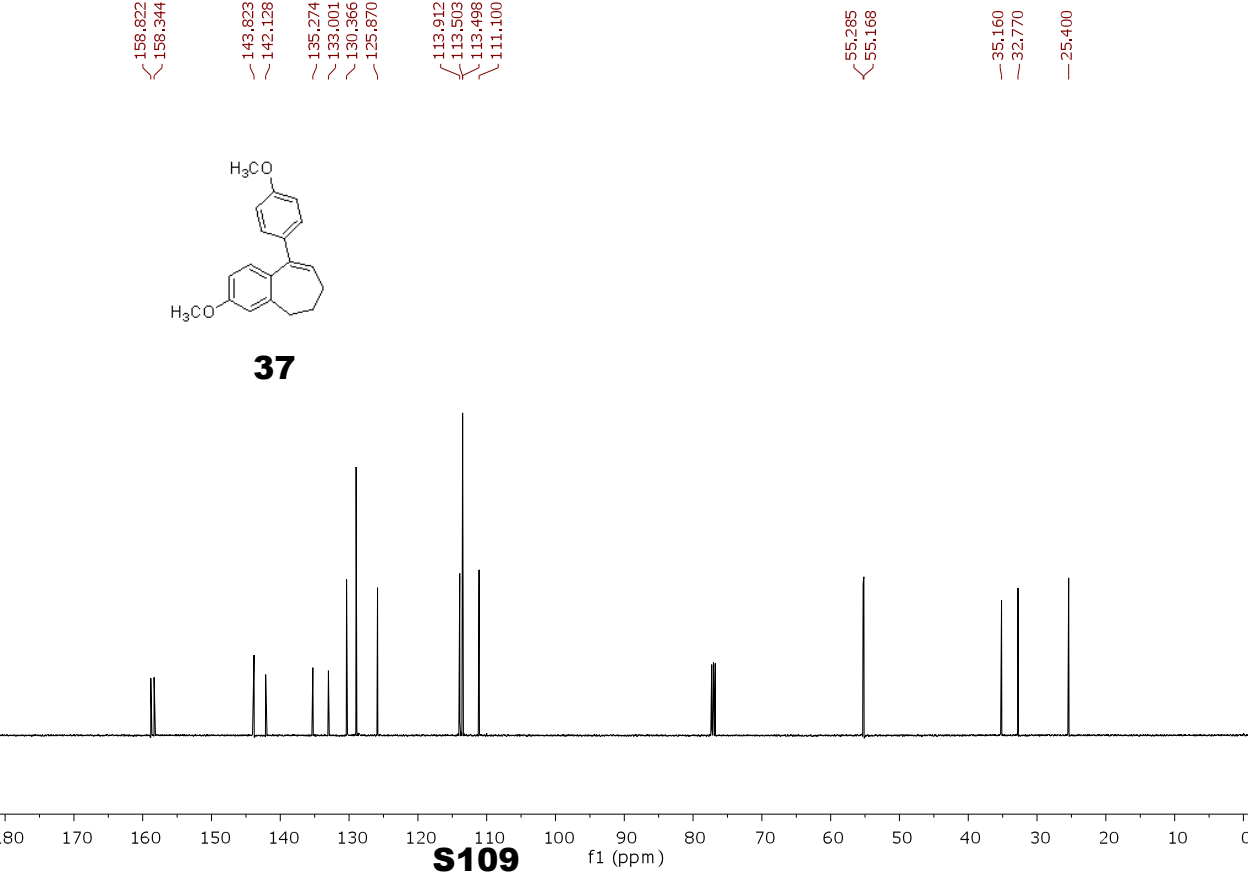

# HPLC for compound 37

=====  
Acq. Operator : Laxman  
Acq. Instrument : Instrument 1 Location : -  
Injection Date : 1/24/2014 4:55:16 PM  
Acq. Method : C:\CHEM32\1\METHODS\MASTERMETHOD.M  
Last changed : 1/24/2014 4:30:40 PM by Laxman  
Analysis Method : C:\CHEM32\1\DATA\LAXMAN\LDIV137-1A-RUN1.D\DA.M (MASTERMETHOD.M)  
Last changed : 1/24/2014 6:21:25 PM by Laxman  
Sample Info : Run1-Mastermethod

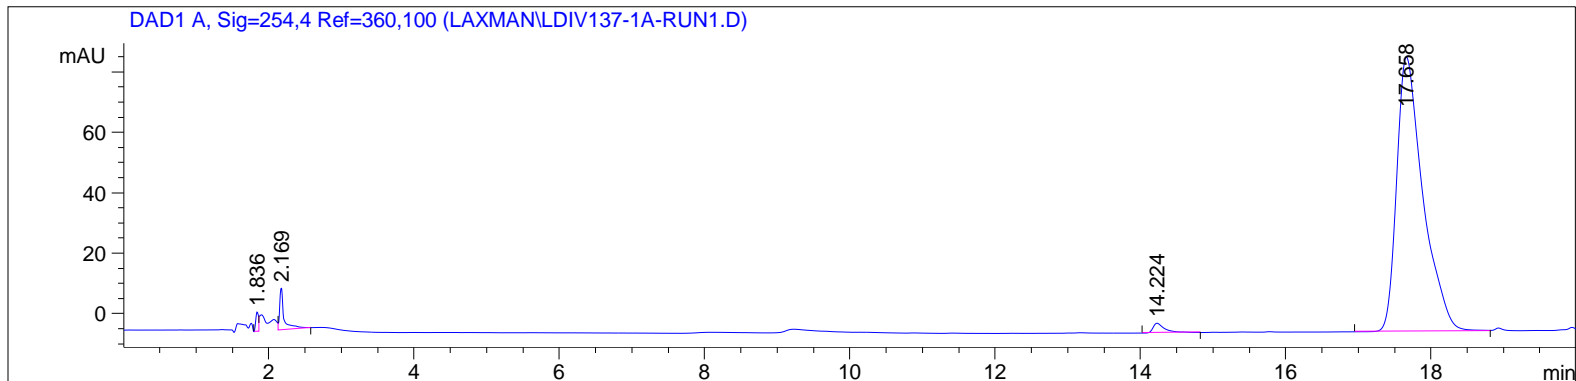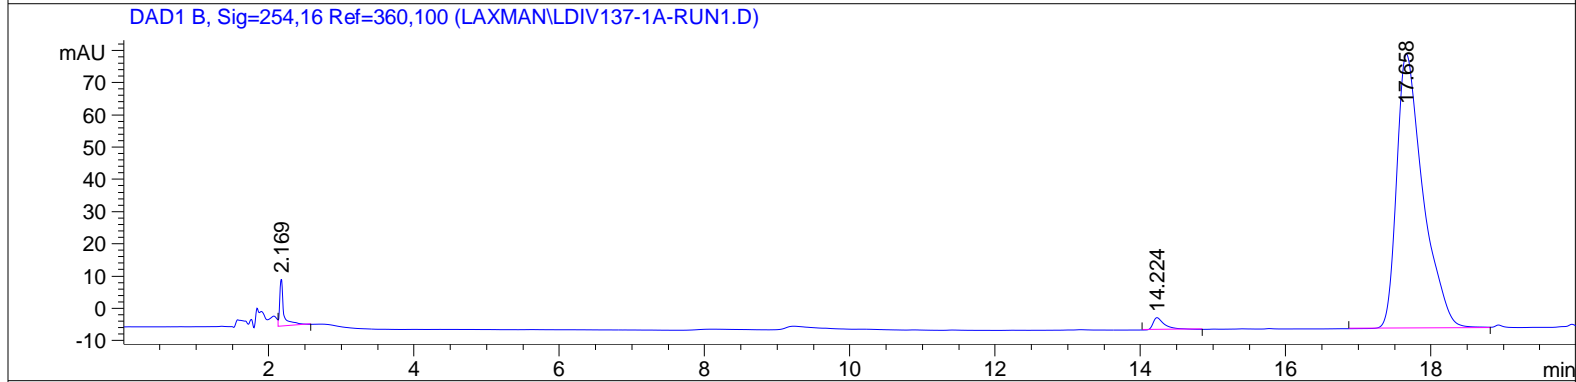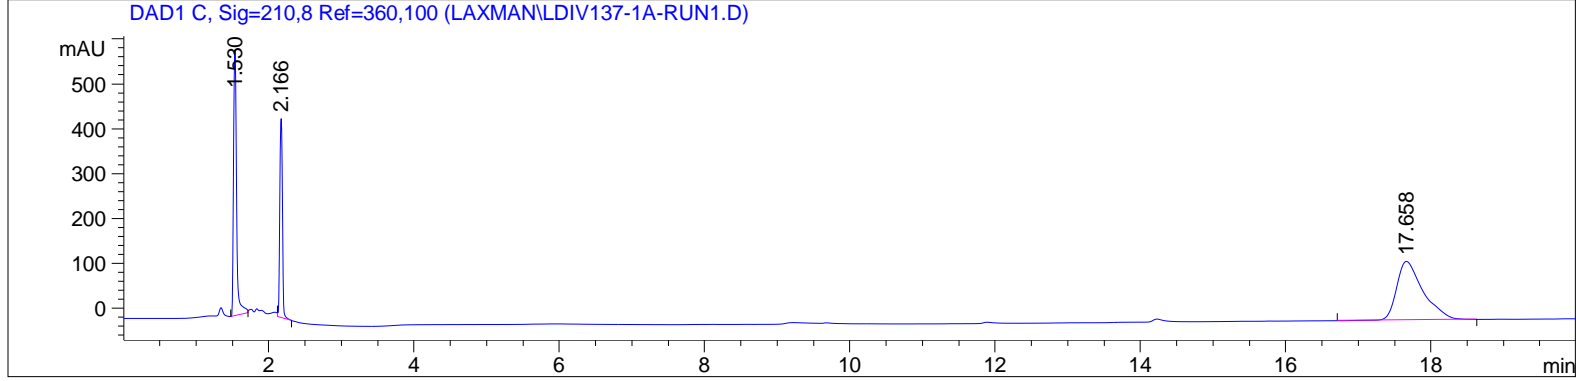

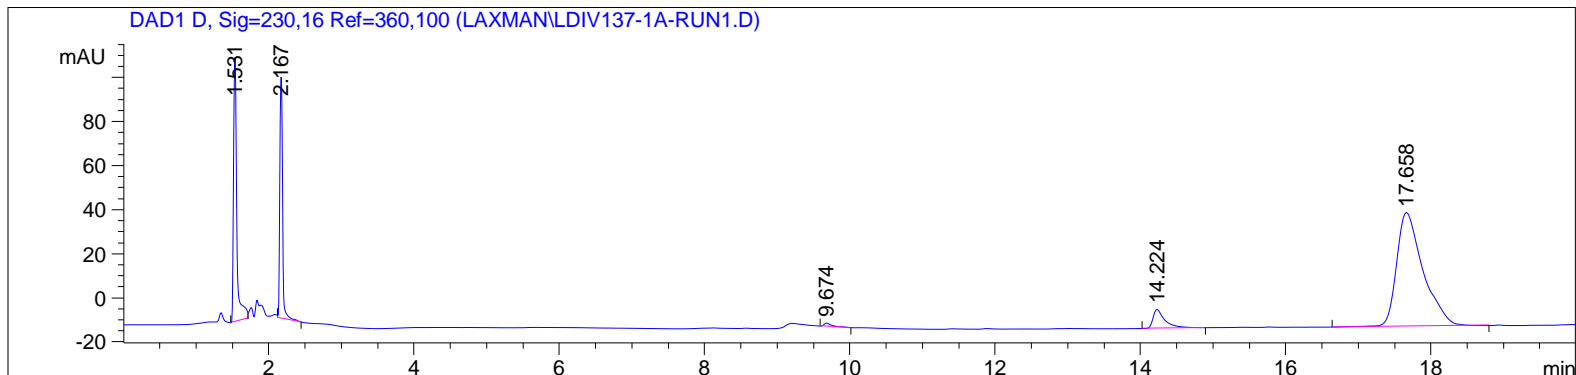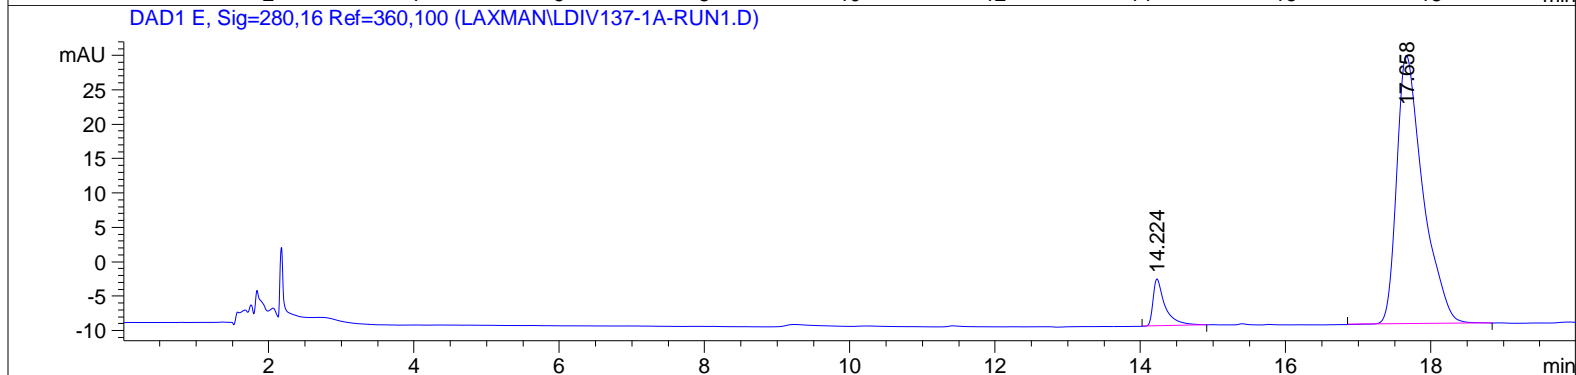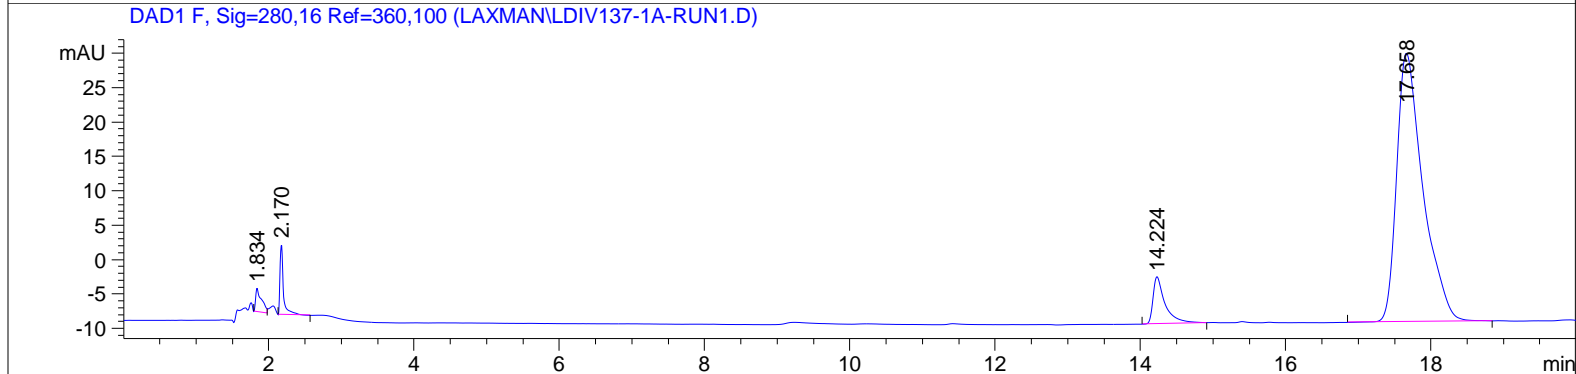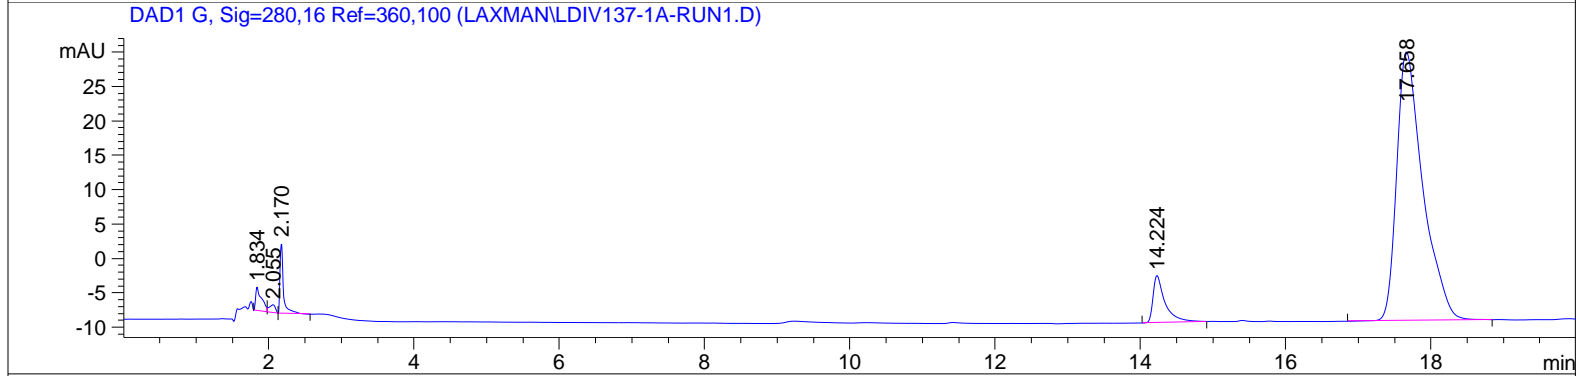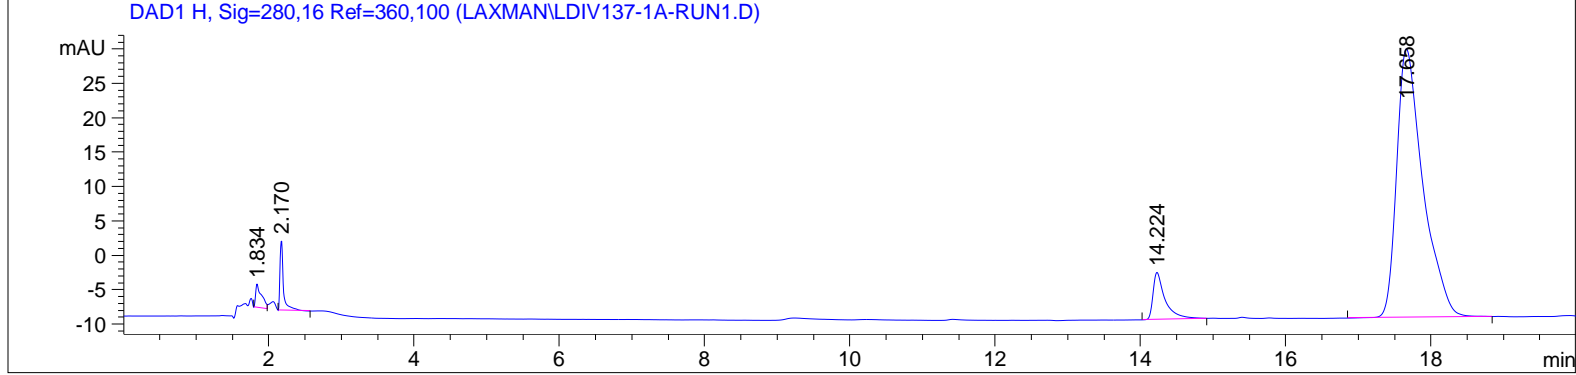

=====  
Area Percent Report  
=====

Sorted By : Signal  
Multiplier : 1.0000  
Dilution : 1.0000  
Use Multiplier & Dilution Factor with ISTDs

Signal 1: DAD1 A, Sig=254,4 Ref=360,100

| Peak # | RetTime [min] | Type | Width [min] | Area [mAU*s] | Height [mAU] | Area %  |
|--------|---------------|------|-------------|--------------|--------------|---------|
| 1      | 1.836         | BV   | 0.0409      | 18.19539     | 6.45327      | 0.7590  |
| 2      | 2.169         | VB   | 0.0613      | 58.36508     | 13.82253     | 2.4345  |
| 3      | 14.224        | BB   | 0.1651      | 36.58915     | 3.20765      | 1.5262  |
| 4      | 17.658        | BV   | 0.3693      | 2284.27368   | 90.85317     | 95.2804 |

Totals : 2397.42330 114.33662

Signal 2: DAD1 B, Sig=254,16 Ref=360,100

| Peak # | RetTime [min] | Type | Width [min] | Area [mAU*s] | Height [mAU] | Area %  |
|--------|---------------|------|-------------|--------------|--------------|---------|
| 1      | 2.169         | VB   | 0.0590      | 58.52003     | 14.53531     | 2.6126  |
| 2      | 14.224        | BB   | 0.1630      | 43.06221     | 3.77694      | 1.9225  |
| 3      | 17.658        | BV   | 0.3693      | 2138.35132   | 85.04366     | 95.4649 |

Totals : 2239.93356 103.35591

Signal 3: DAD1 C, Sig=210,8 Ref=360,100

| Peak # | RetTime [min] | Type | Width [min] | Area [mAU*s] | Height [mAU] | Area %  |
|--------|---------------|------|-------------|--------------|--------------|---------|
| 1      | 1.530         | BV   | 0.0460      | 1748.86523   | 600.82697    | 28.3435 |
| 2      | 2.166         | VB   | 0.0416      | 1125.40662   | 444.25931    | 18.2392 |
| 3      | 17.658        | BB   | 0.3717      | 3295.98486   | 130.90834    | 53.4173 |

Totals : 6170.25671 1175.99461



Signal 4: DAD1 D, Sig=230,16 Ref=360,100

| Peak #   | RetTime [min] | Type | Width [min] | Area [mAU*s] | Height [mAU] | Area %  |
|----------|---------------|------|-------------|--------------|--------------|---------|
| 1        | 1.531         | BV   | 0.0484      | 378.01849    | 121.24623    | 18.1187 |
| 2        | 2.167         | VB   | 0.0430      | 291.49344    | 109.53181    | 13.9715 |
| 3        | 9.674         | BB   | 0.1070      | 11.05938     | 1.48353      | 0.5301  |
| 4        | 14.224        | BB   | 0.1651      | 97.43915     | 8.54247      | 4.6703  |
| 5        | 17.658        | BB   | 0.3736      | 1308.33740   | 51.63680     | 62.7095 |
| Totals : |               |      |             | 2086.34786   | 292.44084    |         |

Signal 5: DAD1 E, Sig=280,16 Ref=360,100

| Peak #   | RetTime [min] | Type | Width [min] | Area [mAU*s] | Height [mAU] | Area %  |
|----------|---------------|------|-------------|--------------|--------------|---------|
| 1        | 14.224        | BB   | 0.1659      | 78.54280     | 6.84231      | 7.4125  |
| 2        | 17.658        | BB   | 0.3691      | 981.05591    | 39.04969     | 92.5875 |
| Totals : |               |      |             | 1059.59871   | 45.89200     |         |

Signal 6: DAD1 F, Sig=280,16 Ref=360,100

| Peak #   | RetTime [min] | Type | Width [min] | Area [mAU*s] | Height [mAU] | Area %  |
|----------|---------------|------|-------------|--------------|--------------|---------|
| 1        | 1.834         | BV   | 0.0789      | 19.77675     | 3.44678      | 1.7756  |
| 2        | 2.170         | BB   | 0.0512      | 34.41515     | 10.23419     | 3.0899  |
| 3        | 14.224        | BB   | 0.1659      | 78.54280     | 6.84231      | 7.0518  |
| 4        | 17.658        | BB   | 0.3691      | 981.05591    | 39.04969     | 88.0826 |
| Totals : |               |      |             | 1113.79061   | 59.57297     |         |

Signal 7: DAD1 G, Sig=280,16 Ref=360,100

| Peak # | RetTime [min] | Type | Width [min] | Area [mAU*s] | Height [mAU] | Area %  |
|--------|---------------|------|-------------|--------------|--------------|---------|
| 1      | 1.834         | BV   | 0.0789      | 19.77675     | 3.44678      | 1.7652  |
| 2      | 2.055         | VB   | 0.0840      | 6.56384      | 1.16043      | 0.5859  |
| 3      | 2.170         | BB   | 0.0512      | 34.41515     | 10.23419     | 3.0718  |
| 4      | 14.224        | BB   | 0.1659      | 78.54280     | 6.84231      | 7.0105  |
| 5      | 17.658        | BB   | 0.3691      | 981.05591    | 39.04969     | 87.5666 |

Sample Name: LD-IV-137-1A-Run1

Totals : 1120.35444 60.73339

Signal 8: DAD1 H, Sig=280,16 Ref=360,100

| Peak # | RetTime [min] | Type | Width [min] | Area [mAU*s] | Height [mAU] | Area %  |
|--------|---------------|------|-------------|--------------|--------------|---------|
| 1      | 1.834         | BV   | 0.0789      | 19.77675     | 3.44678      | 1.7756  |
| 2      | 2.170         | BB   | 0.0512      | 34.41515     | 10.23419     | 3.0899  |
| 3      | 14.224        | BB   | 0.1659      | 78.54280     | 6.84231      | 7.0518  |
| 4      | 17.658        | BB   | 0.3691      | 981.05591    | 39.04969     | 88.0826 |

Totals : 1113.79061 59.57297

=====  
\*\*\* End of Report \*\*\*

# HRMS for compound 37

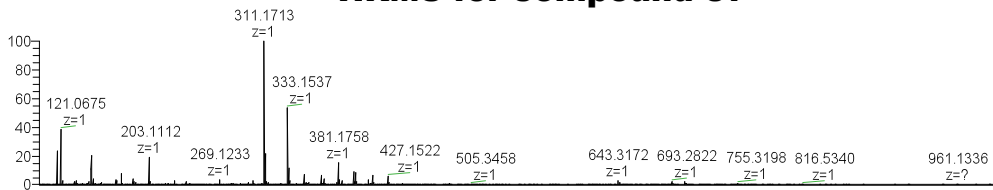

NL:  
1.10E8  
LD-IV-137-1A-Orbi  
+ESI#12 R1: 0.11 AV:  
1 T: FTMS + p ESI  
sid=35.00 Full ms  
[100.00-1000.00]

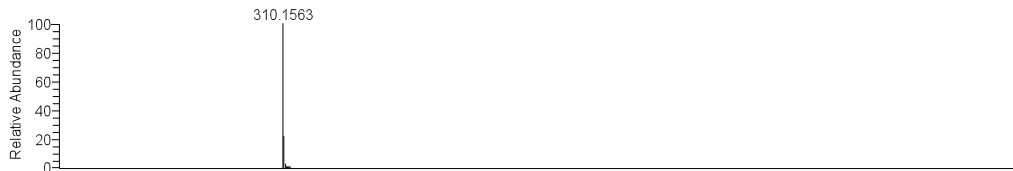

NL:  
7.99E5  
C<sub>20</sub>H<sub>22</sub>O<sub>3</sub>  
C<sub>20</sub>H<sub>22</sub>O<sub>3</sub>  
pa Chrg 1

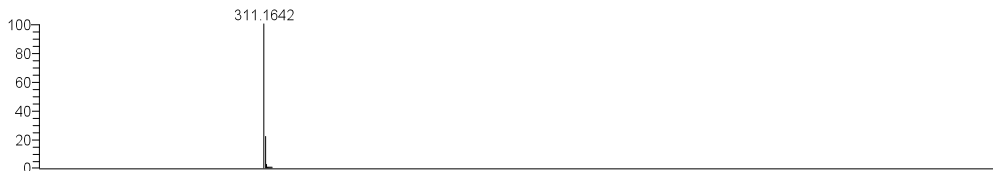

NL:  
7.98E5  
C<sub>20</sub>H<sub>22</sub>O<sub>3</sub>+H  
C<sub>20</sub>H<sub>23</sub>O<sub>3</sub>  
pa Chrg 1

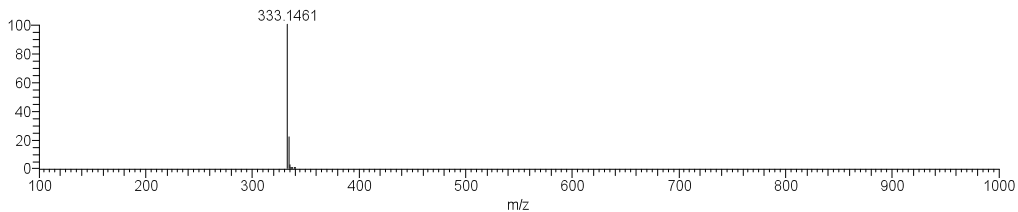

NL:  
7.99E5  
C<sub>20</sub>H<sub>22</sub>O<sub>3</sub>+Na  
C<sub>20</sub>H<sub>22</sub>O<sub>3</sub>Na<sub>1</sub>  
pa Chrg 1

**S115**

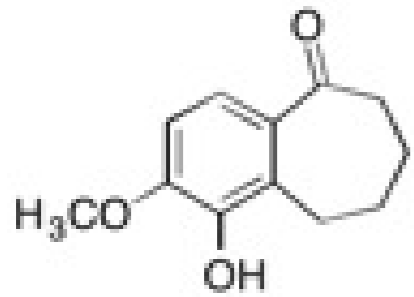

**38**

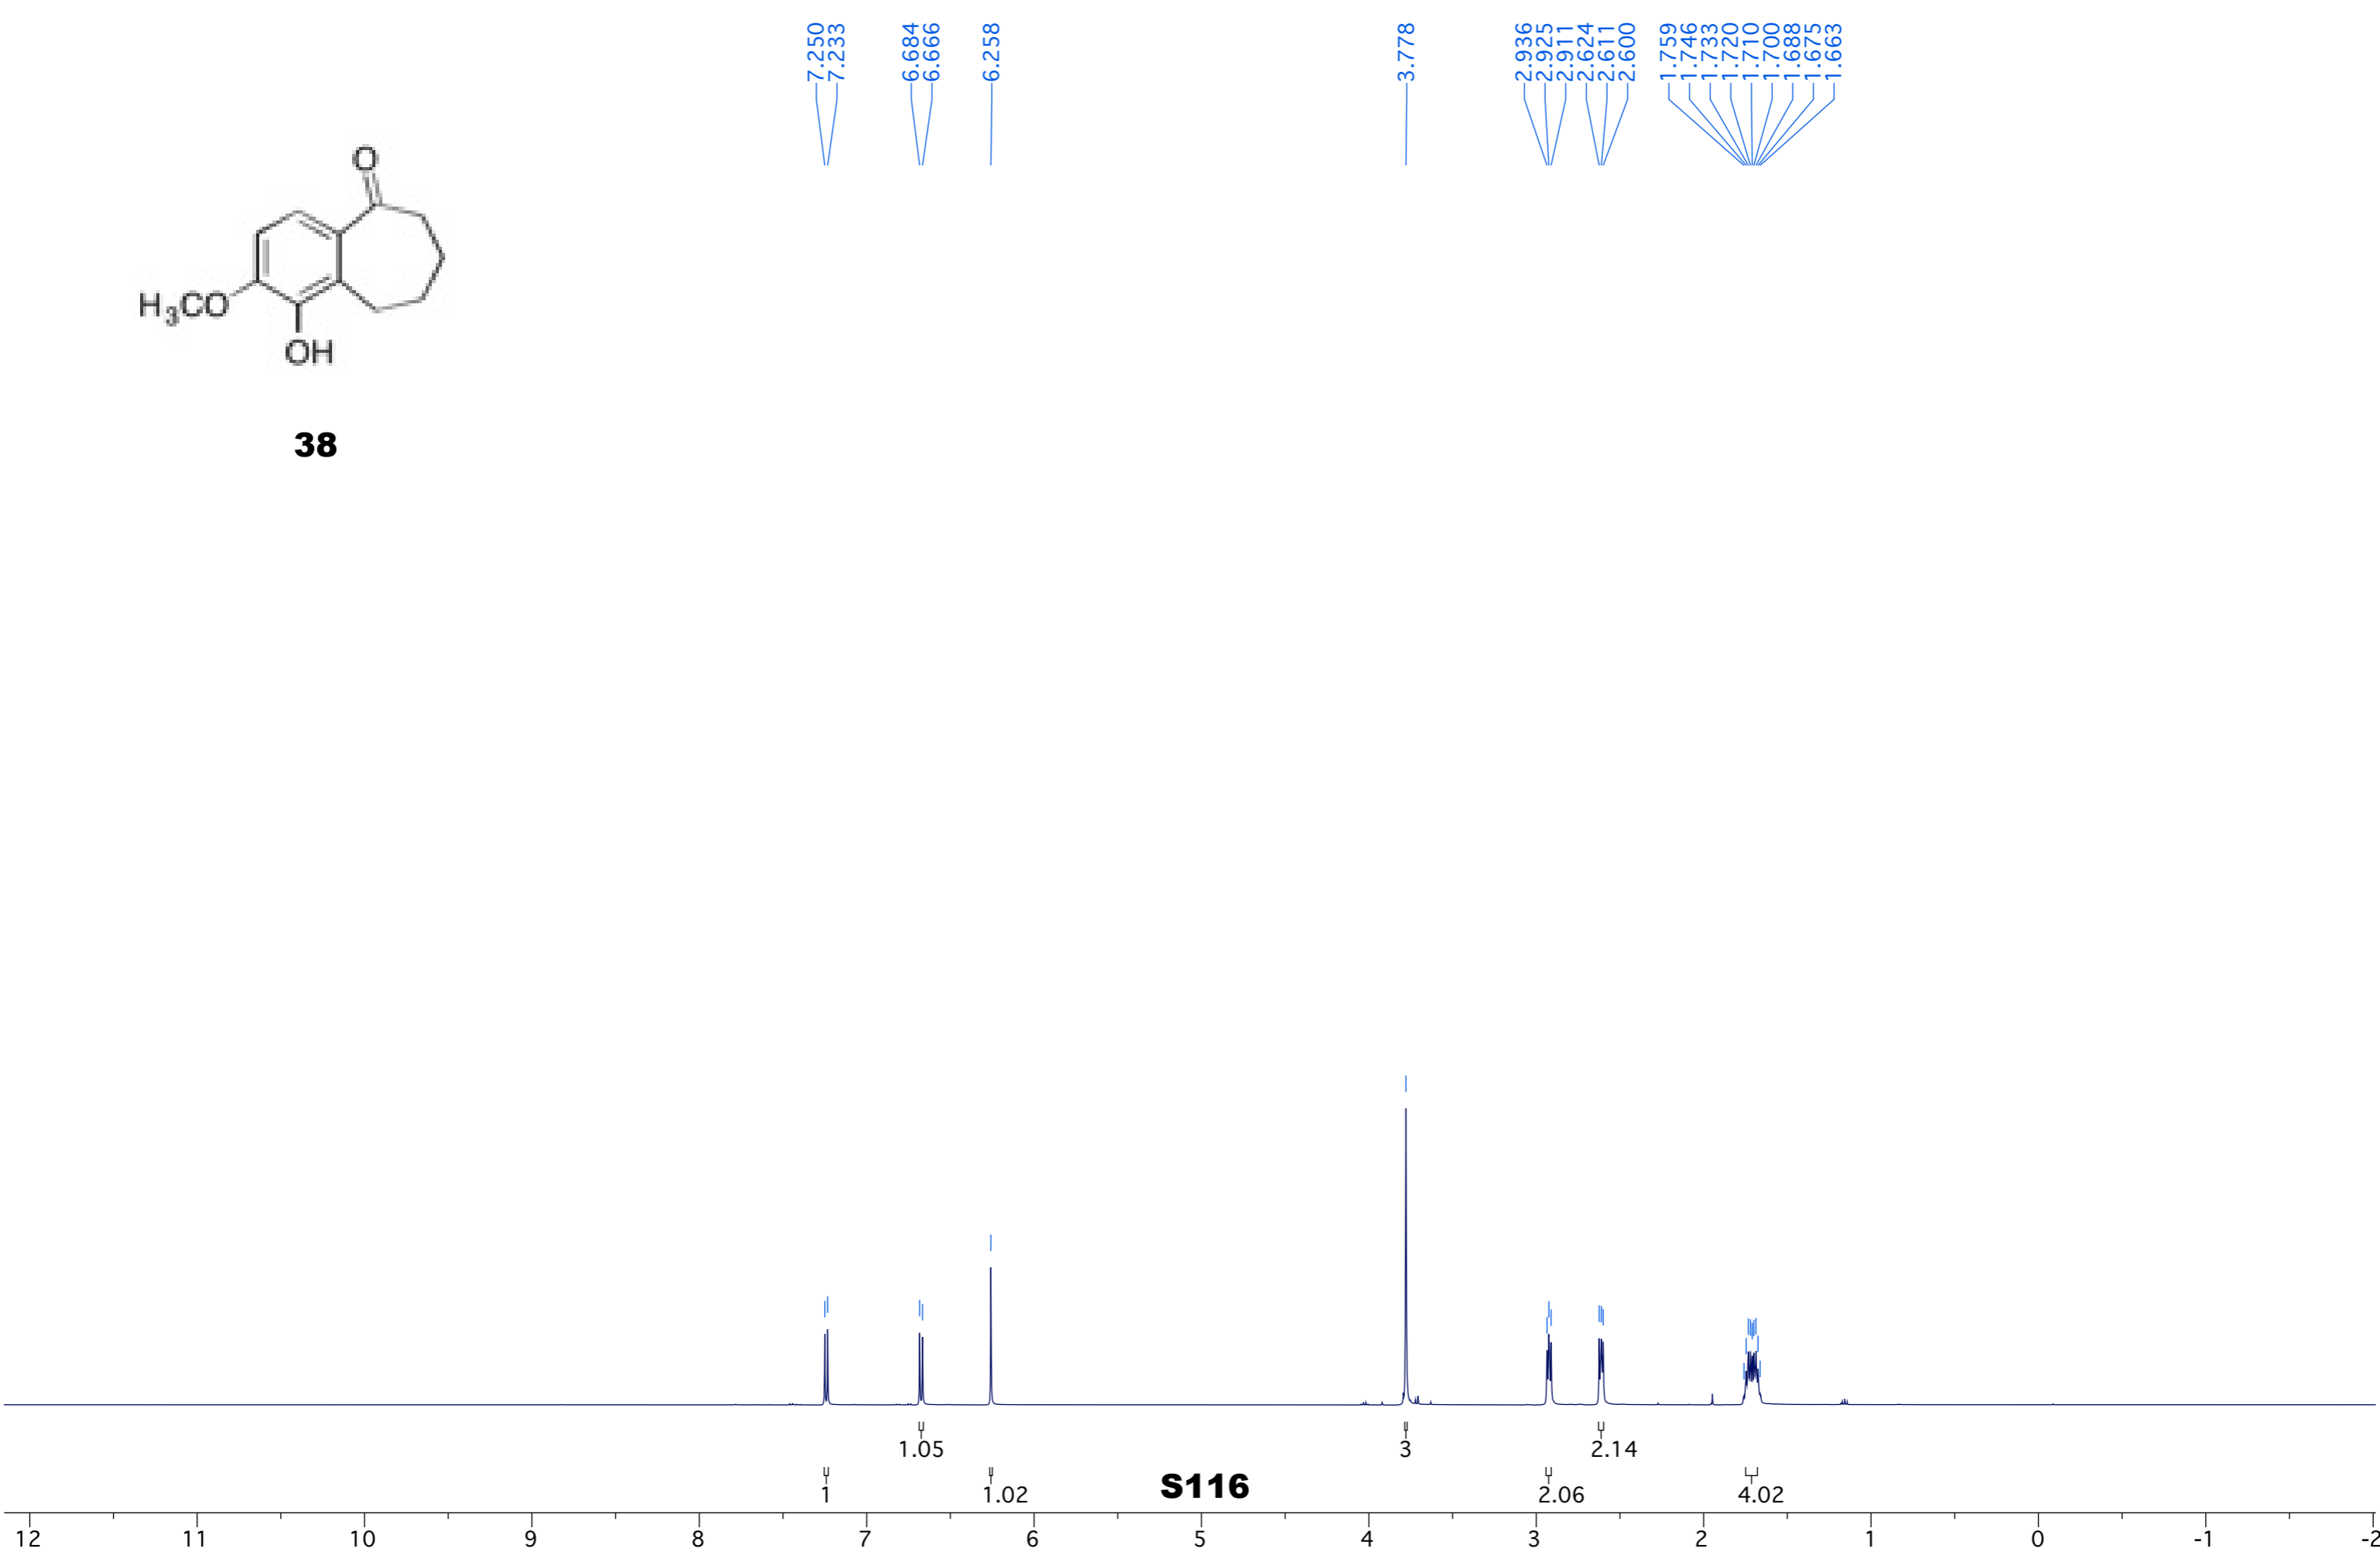

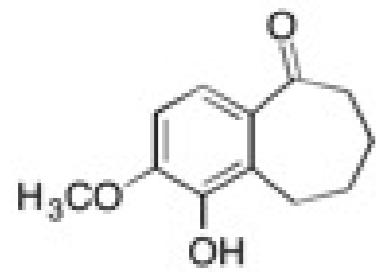

**38**

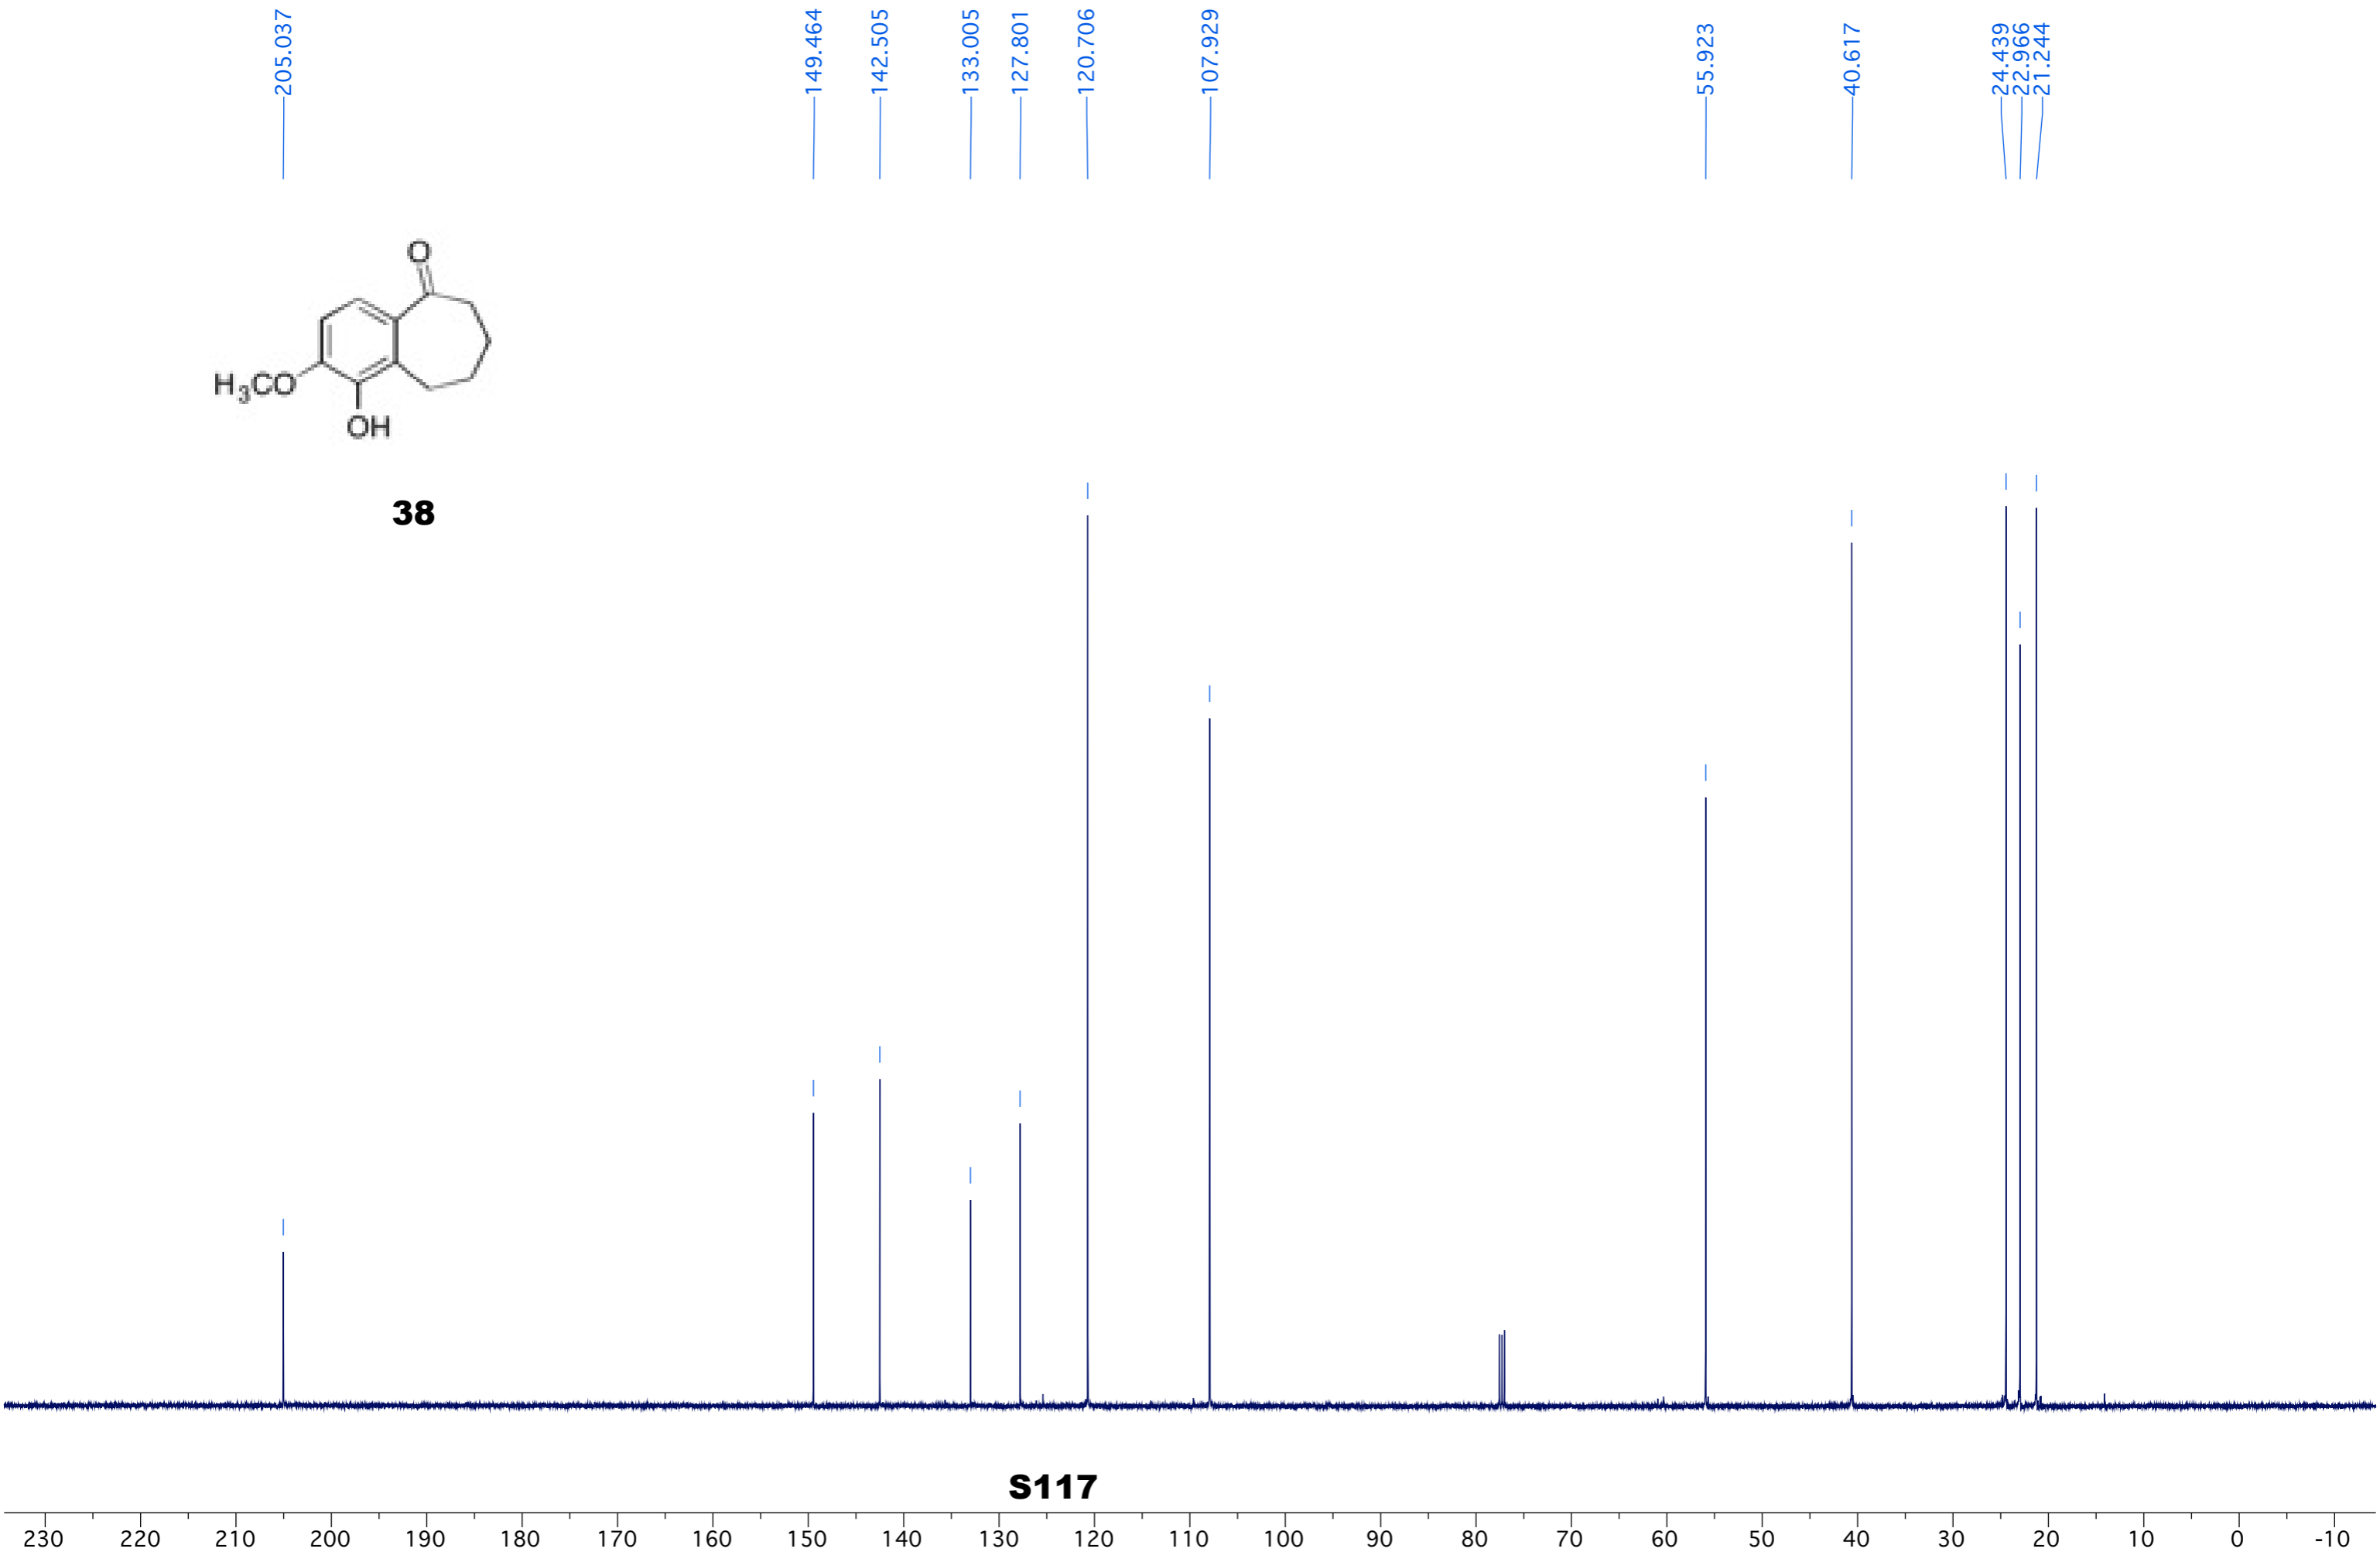

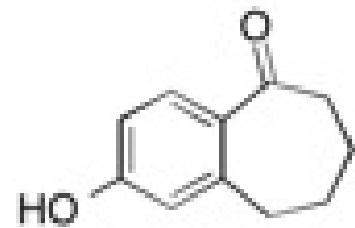

**39**

7.740  
7.723

7.258

6.769  
6.764  
6.752  
6.747  
6.675

3.843

2.883  
2.871  
2.858  
2.724  
2.712  
2.700

1.870  
1.858  
1.845  
1.832  
1.814  
1.803  
1.791  
1.779

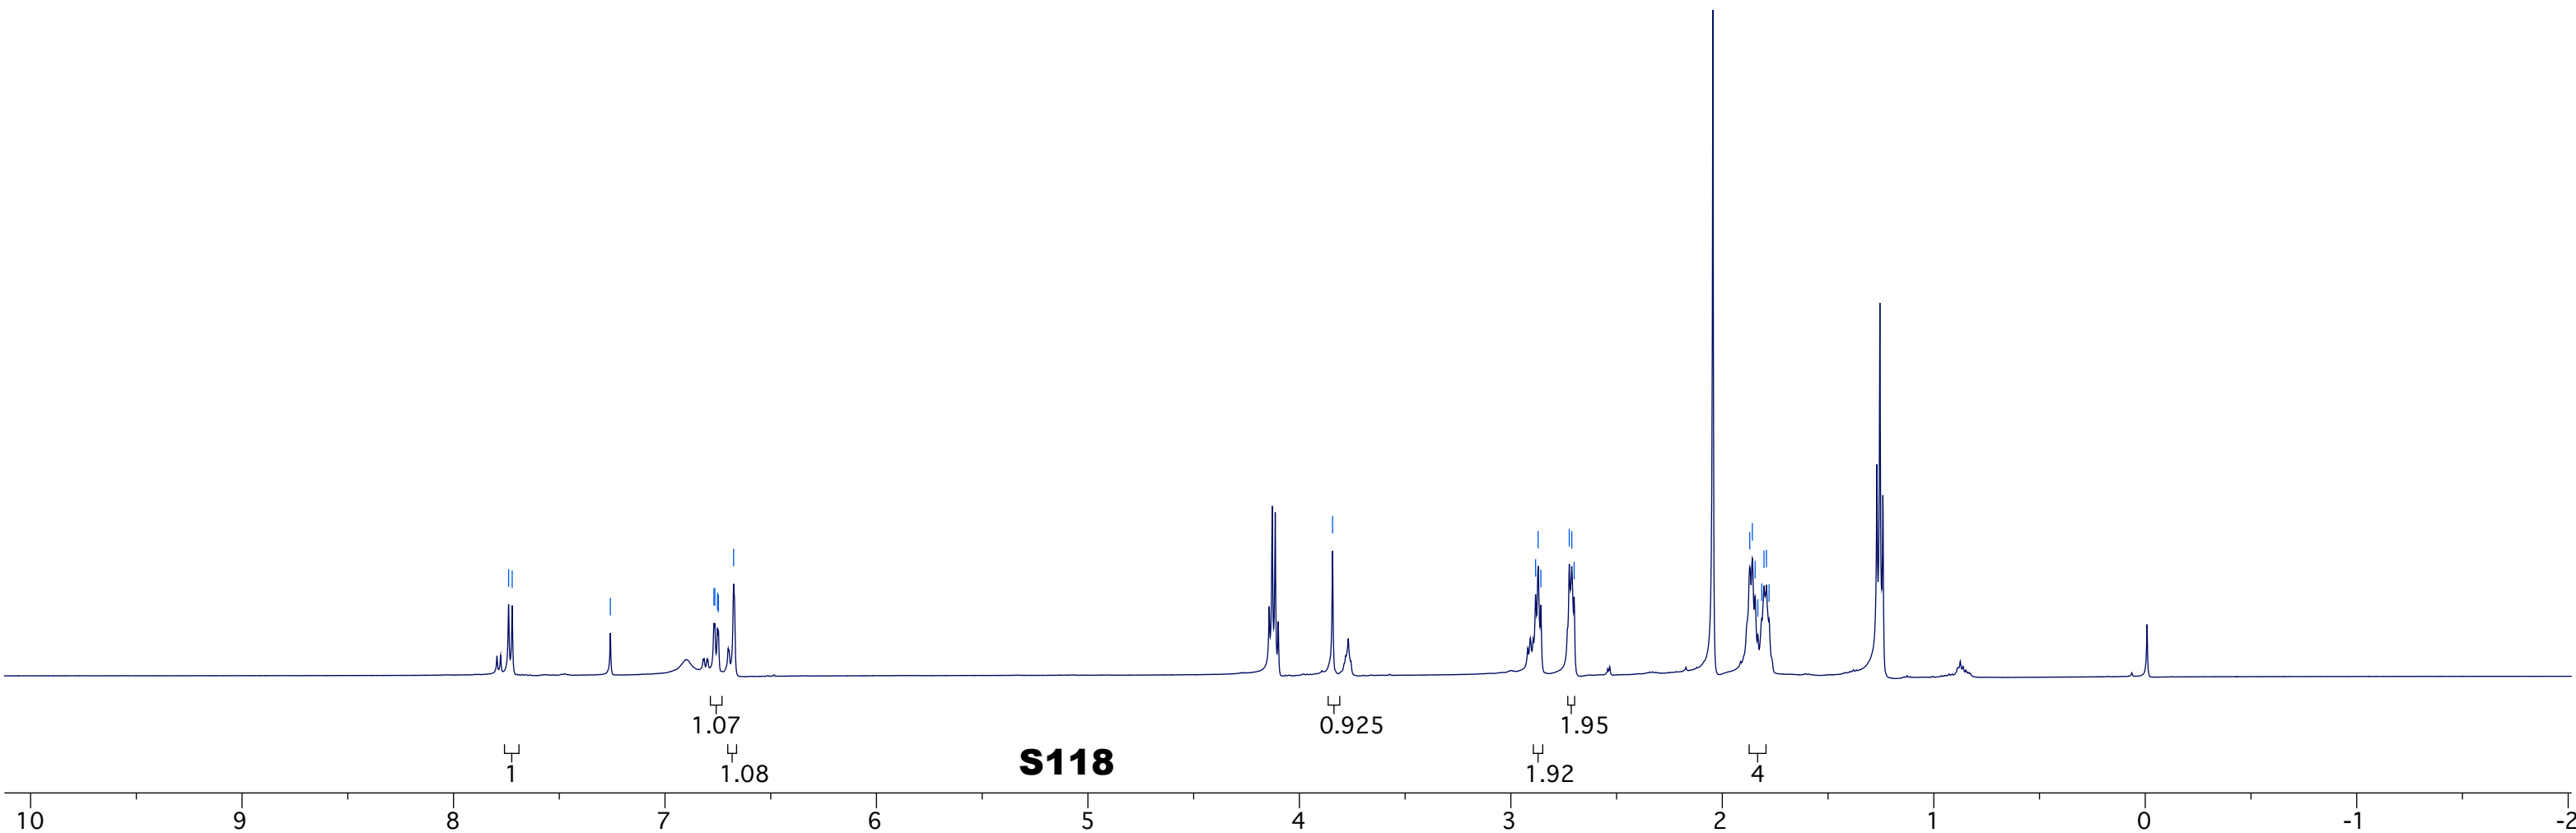

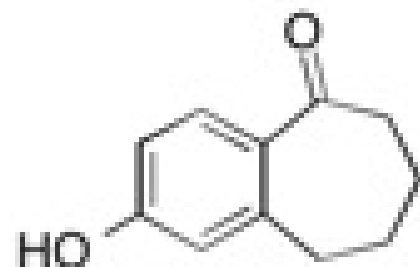

**39**

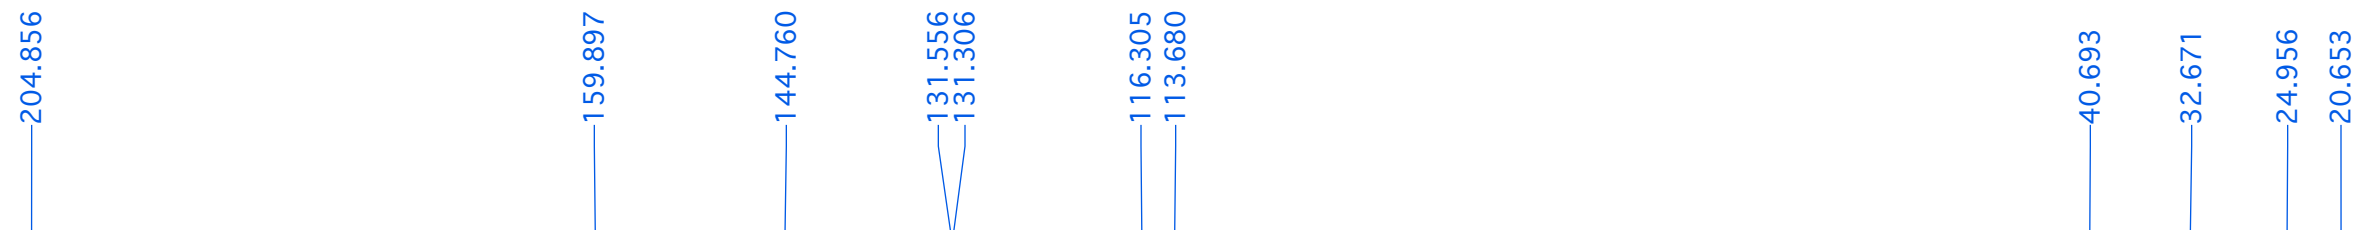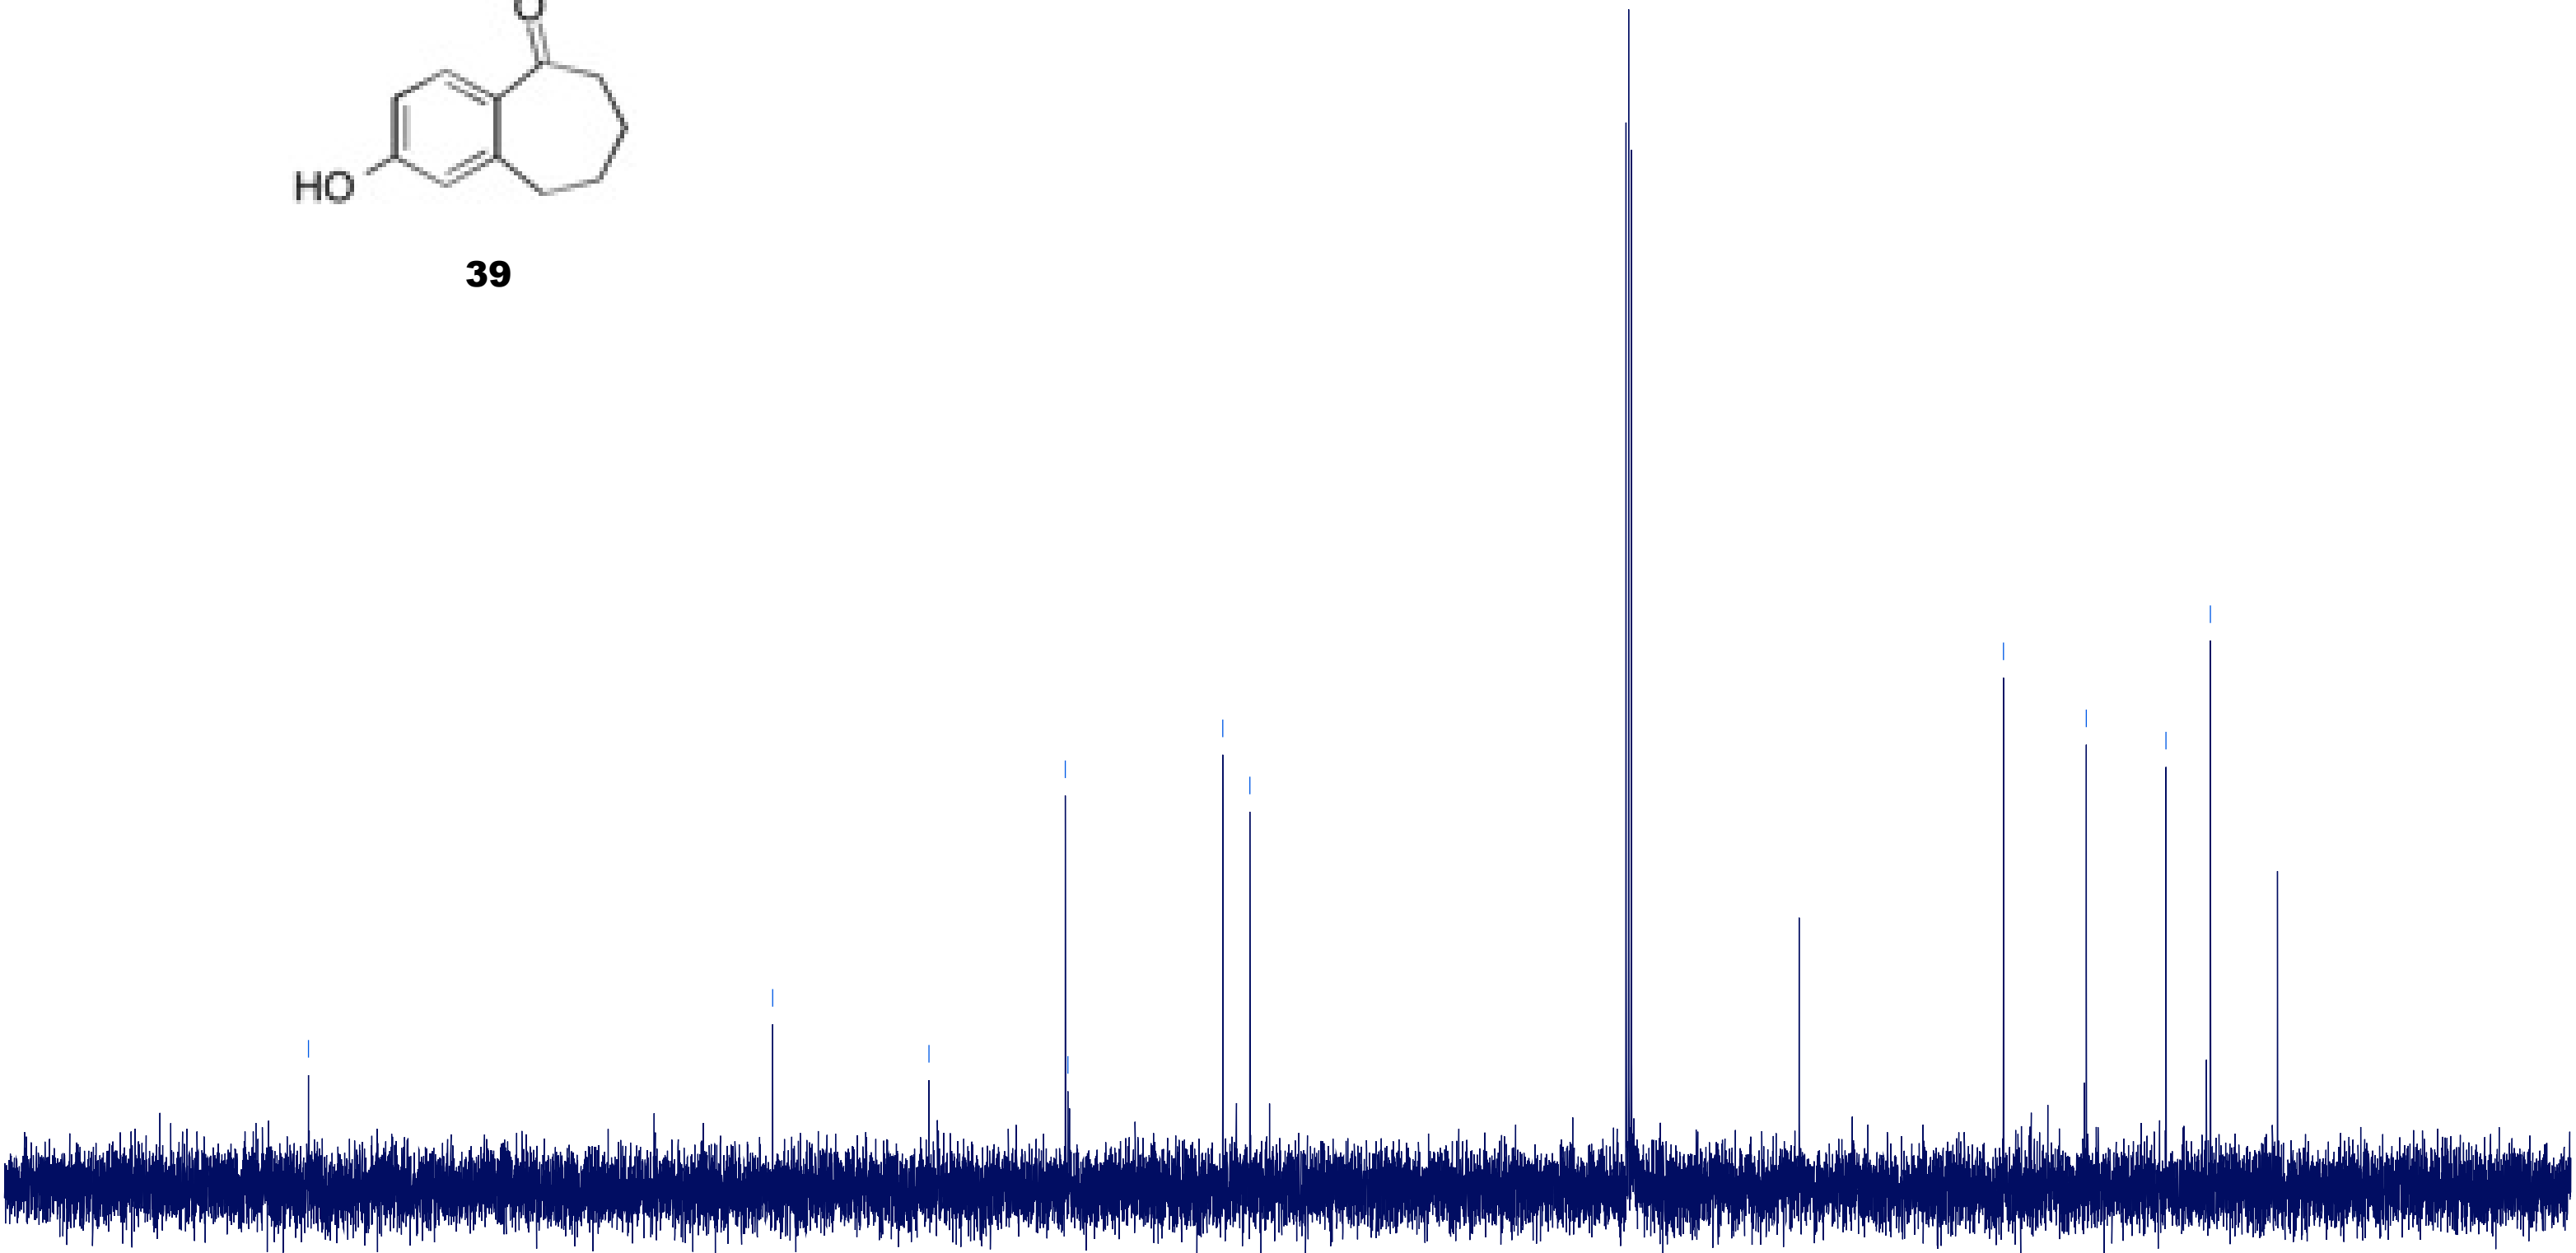

**S119**

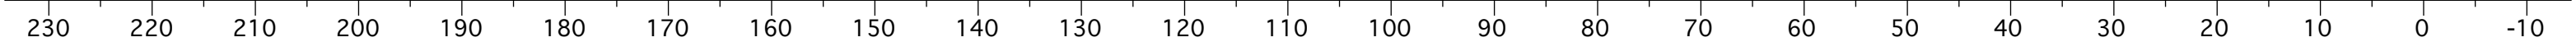

7.14  
7.13

6.79  
6.78

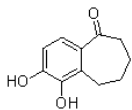

**40**

3.04  
3.03  
3.03  
3.02  
2.64  
2.63  
2.63  
2.62  
2.62  
1.83  
1.83  
1.82  
1.82  
1.81  
1.80  
1.79  
1.78  
1.77  
1.76  
1.76  
1.75  
1.74  
1.74  
1.73  
1.73  
1.72  
1.72

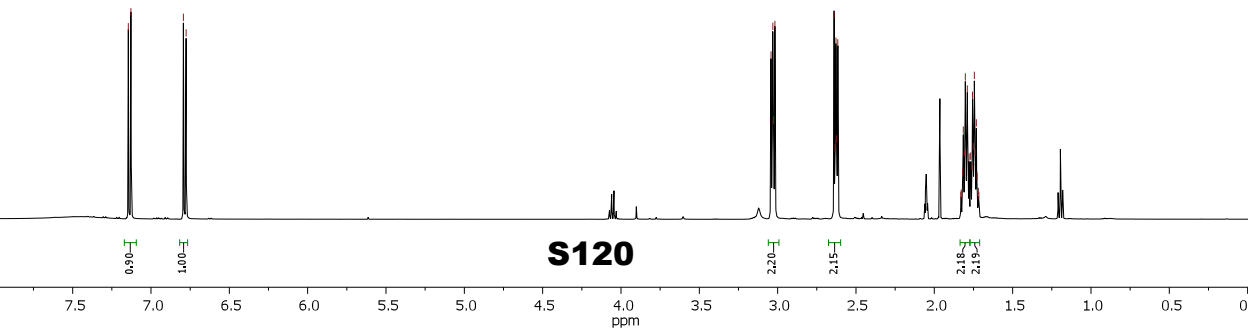



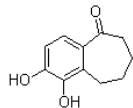

**40**

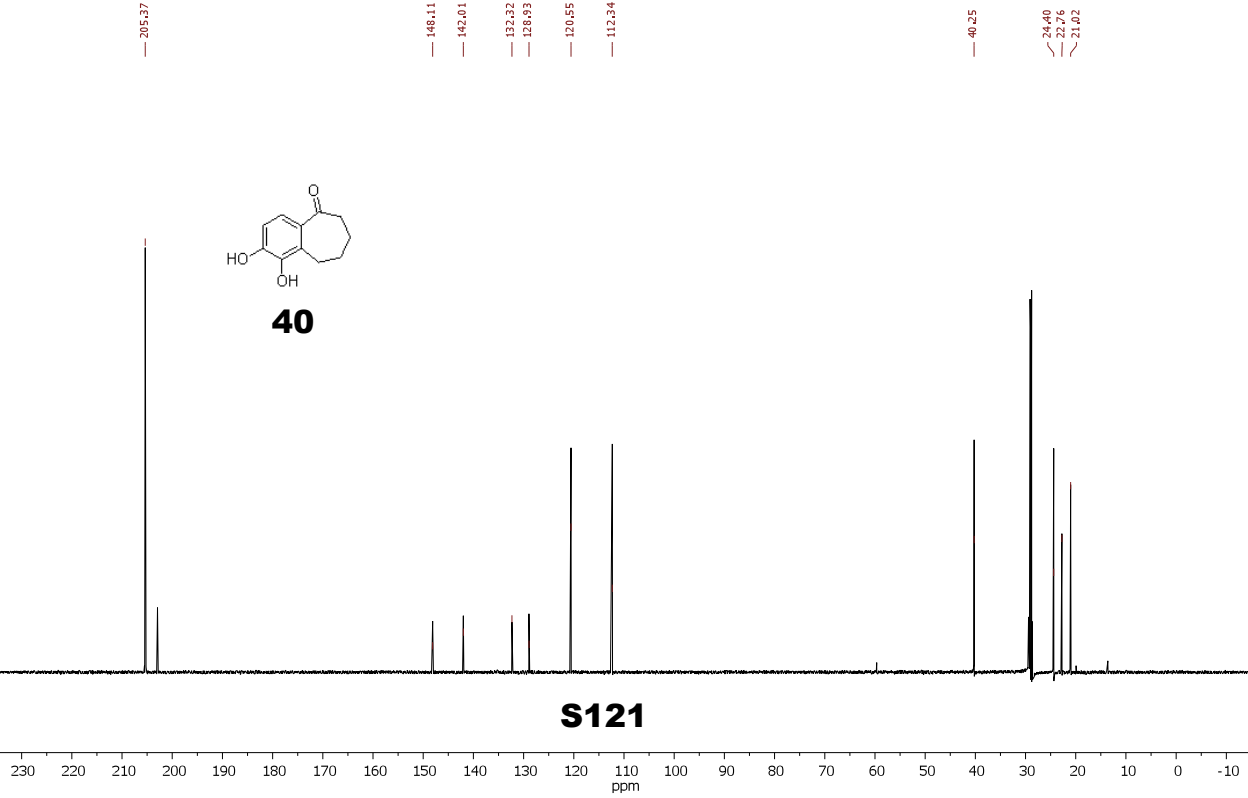

**S121**

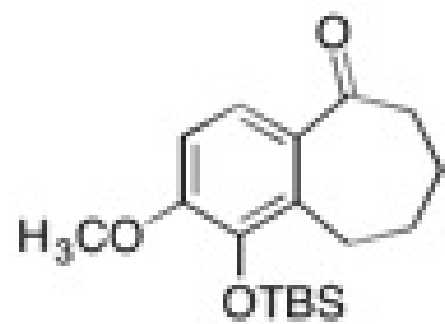

**41**

ppm 8

7

6

5

4

3

2

1

0

-1

-2

7.244  
7.227

6.632  
6.614

3.672

2.886  
2.875  
2.862

2.544  
2.532  
2.521

1.678  
1.666  
1.653  
1.644  
1.635  
1.622  
1.610

0.892  
0.796

0.061  
-0.046

1

1.01

**S122**

2.96

1.98

2.08

4.09

9.01

5.98

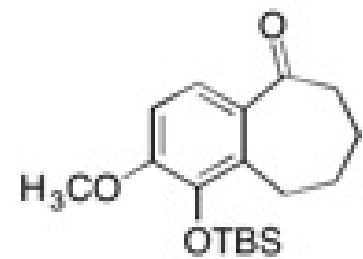

**41**

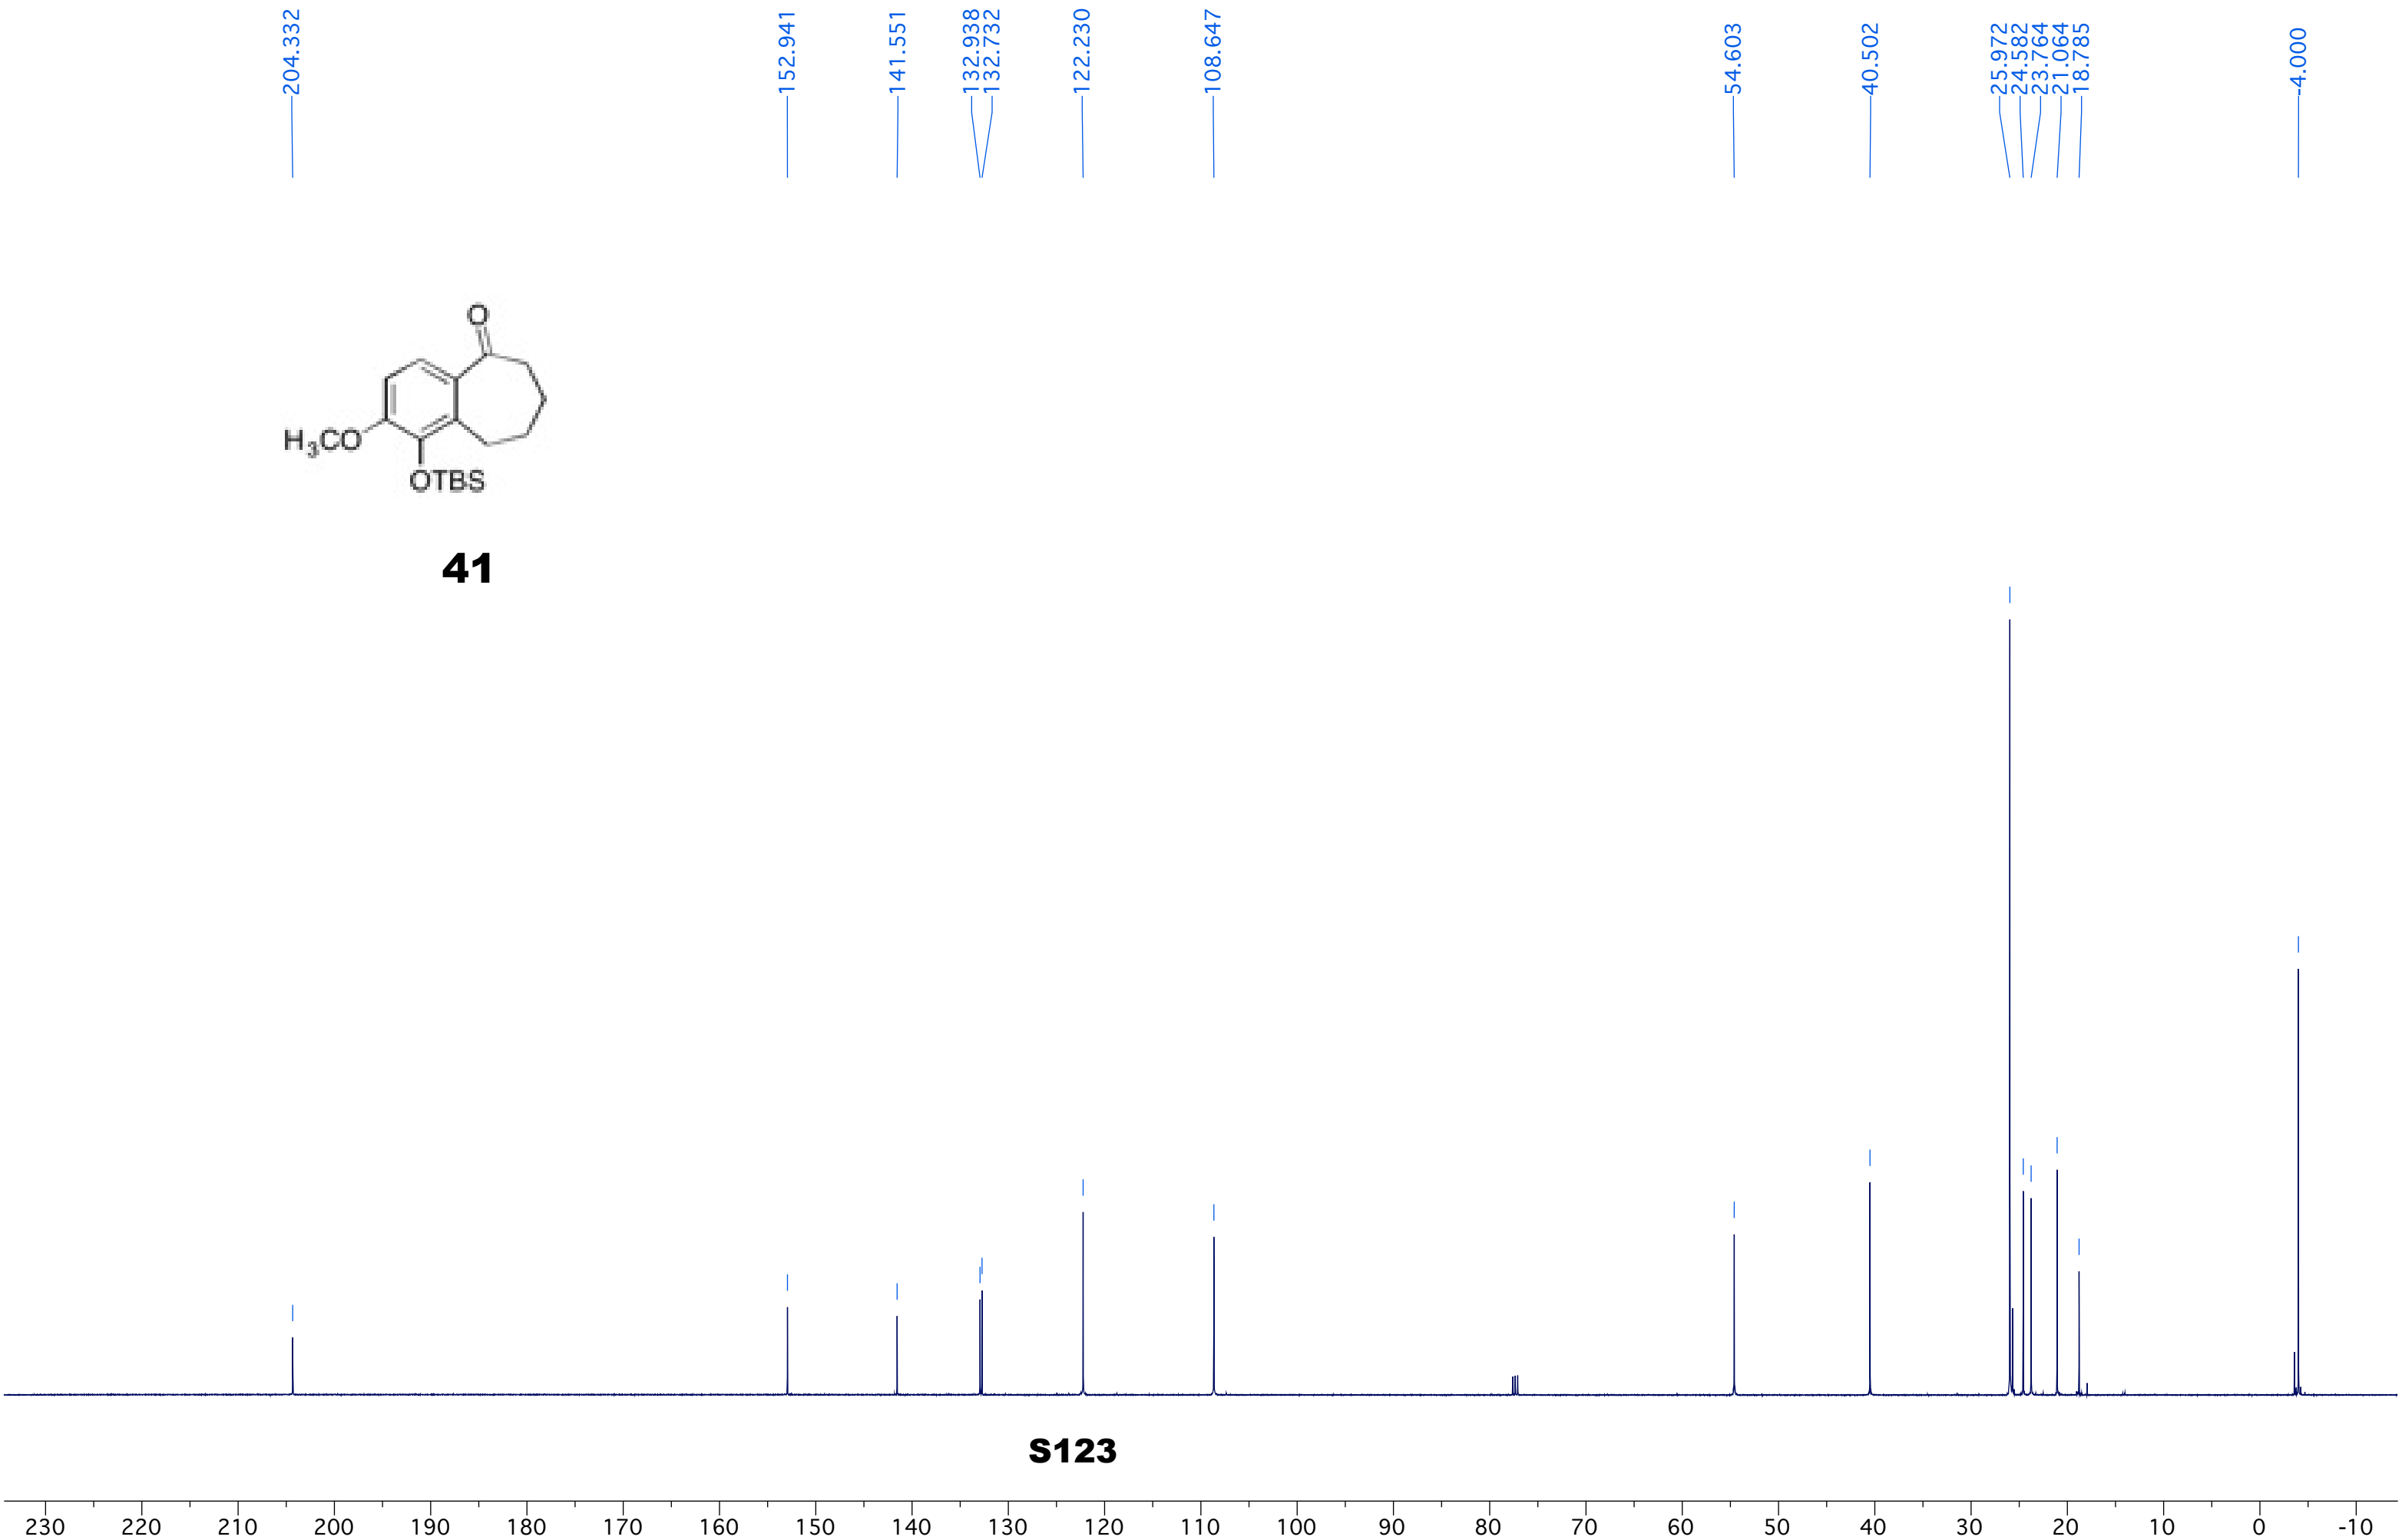

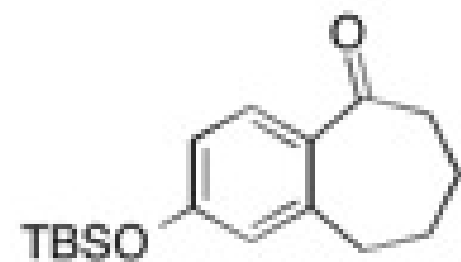

**42**

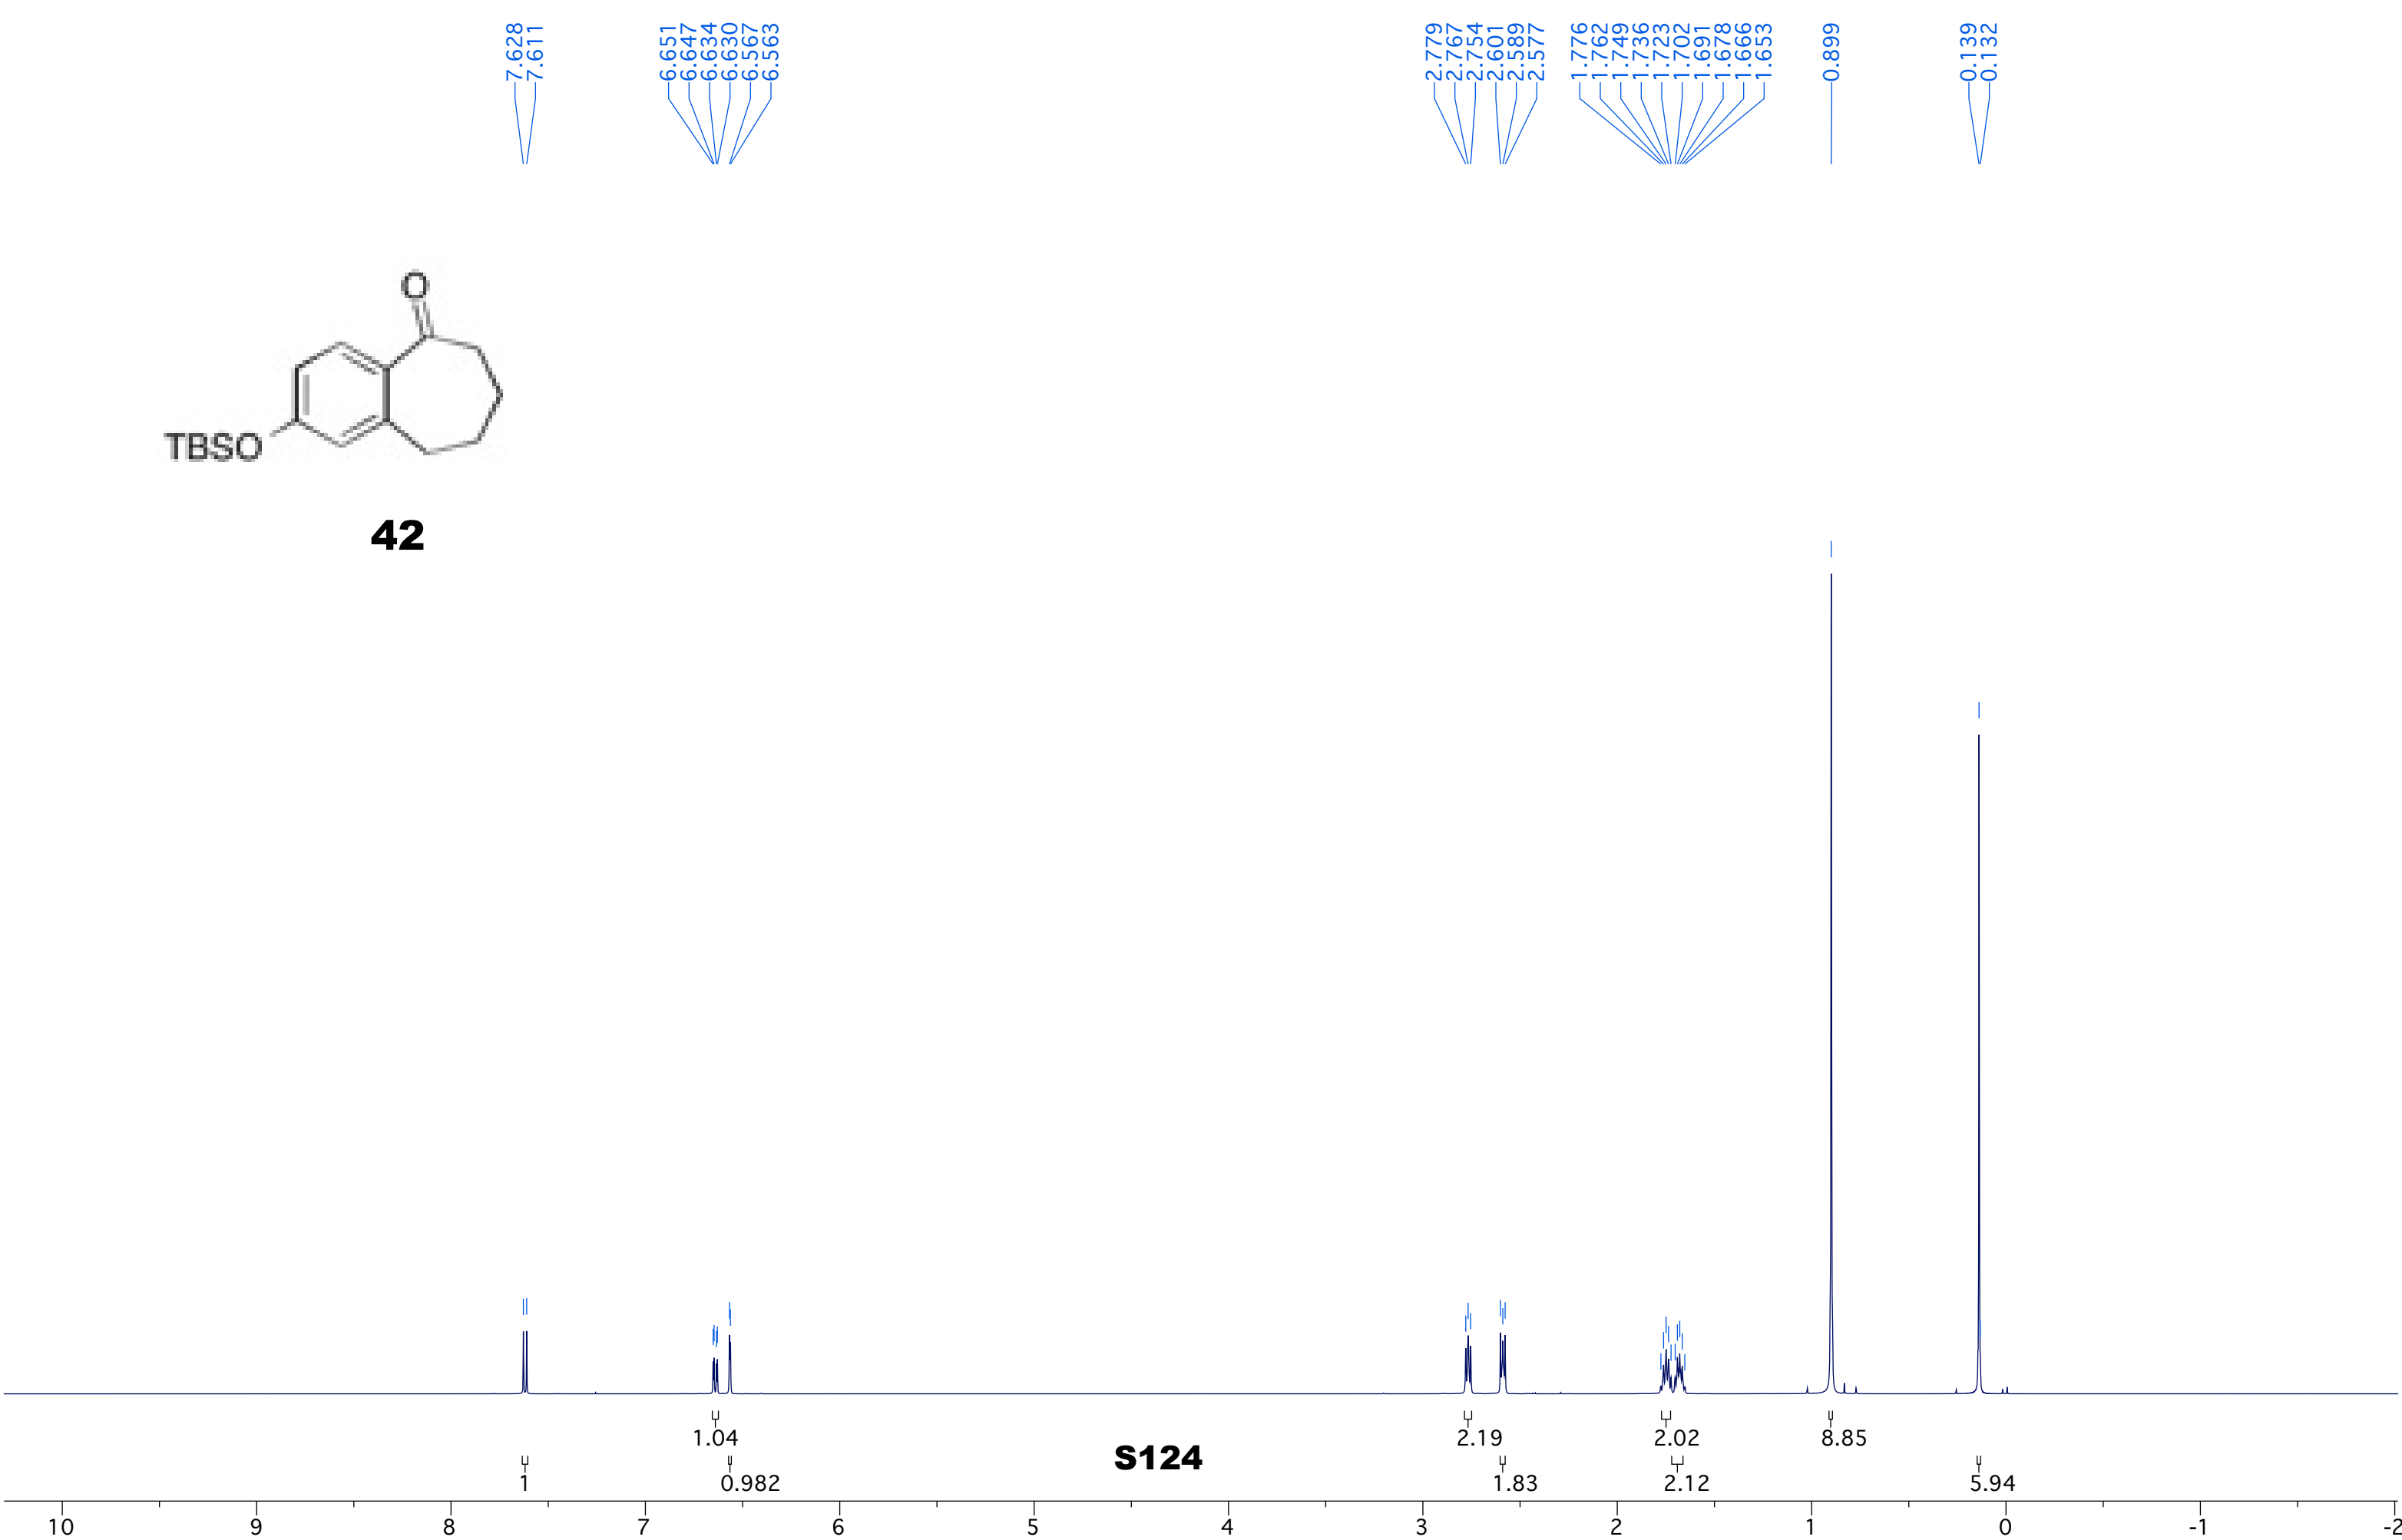

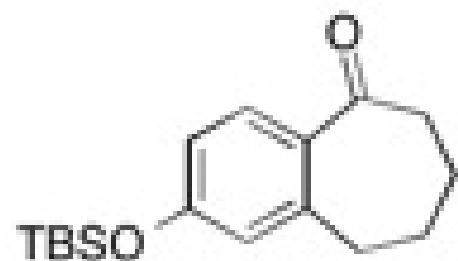

**42**

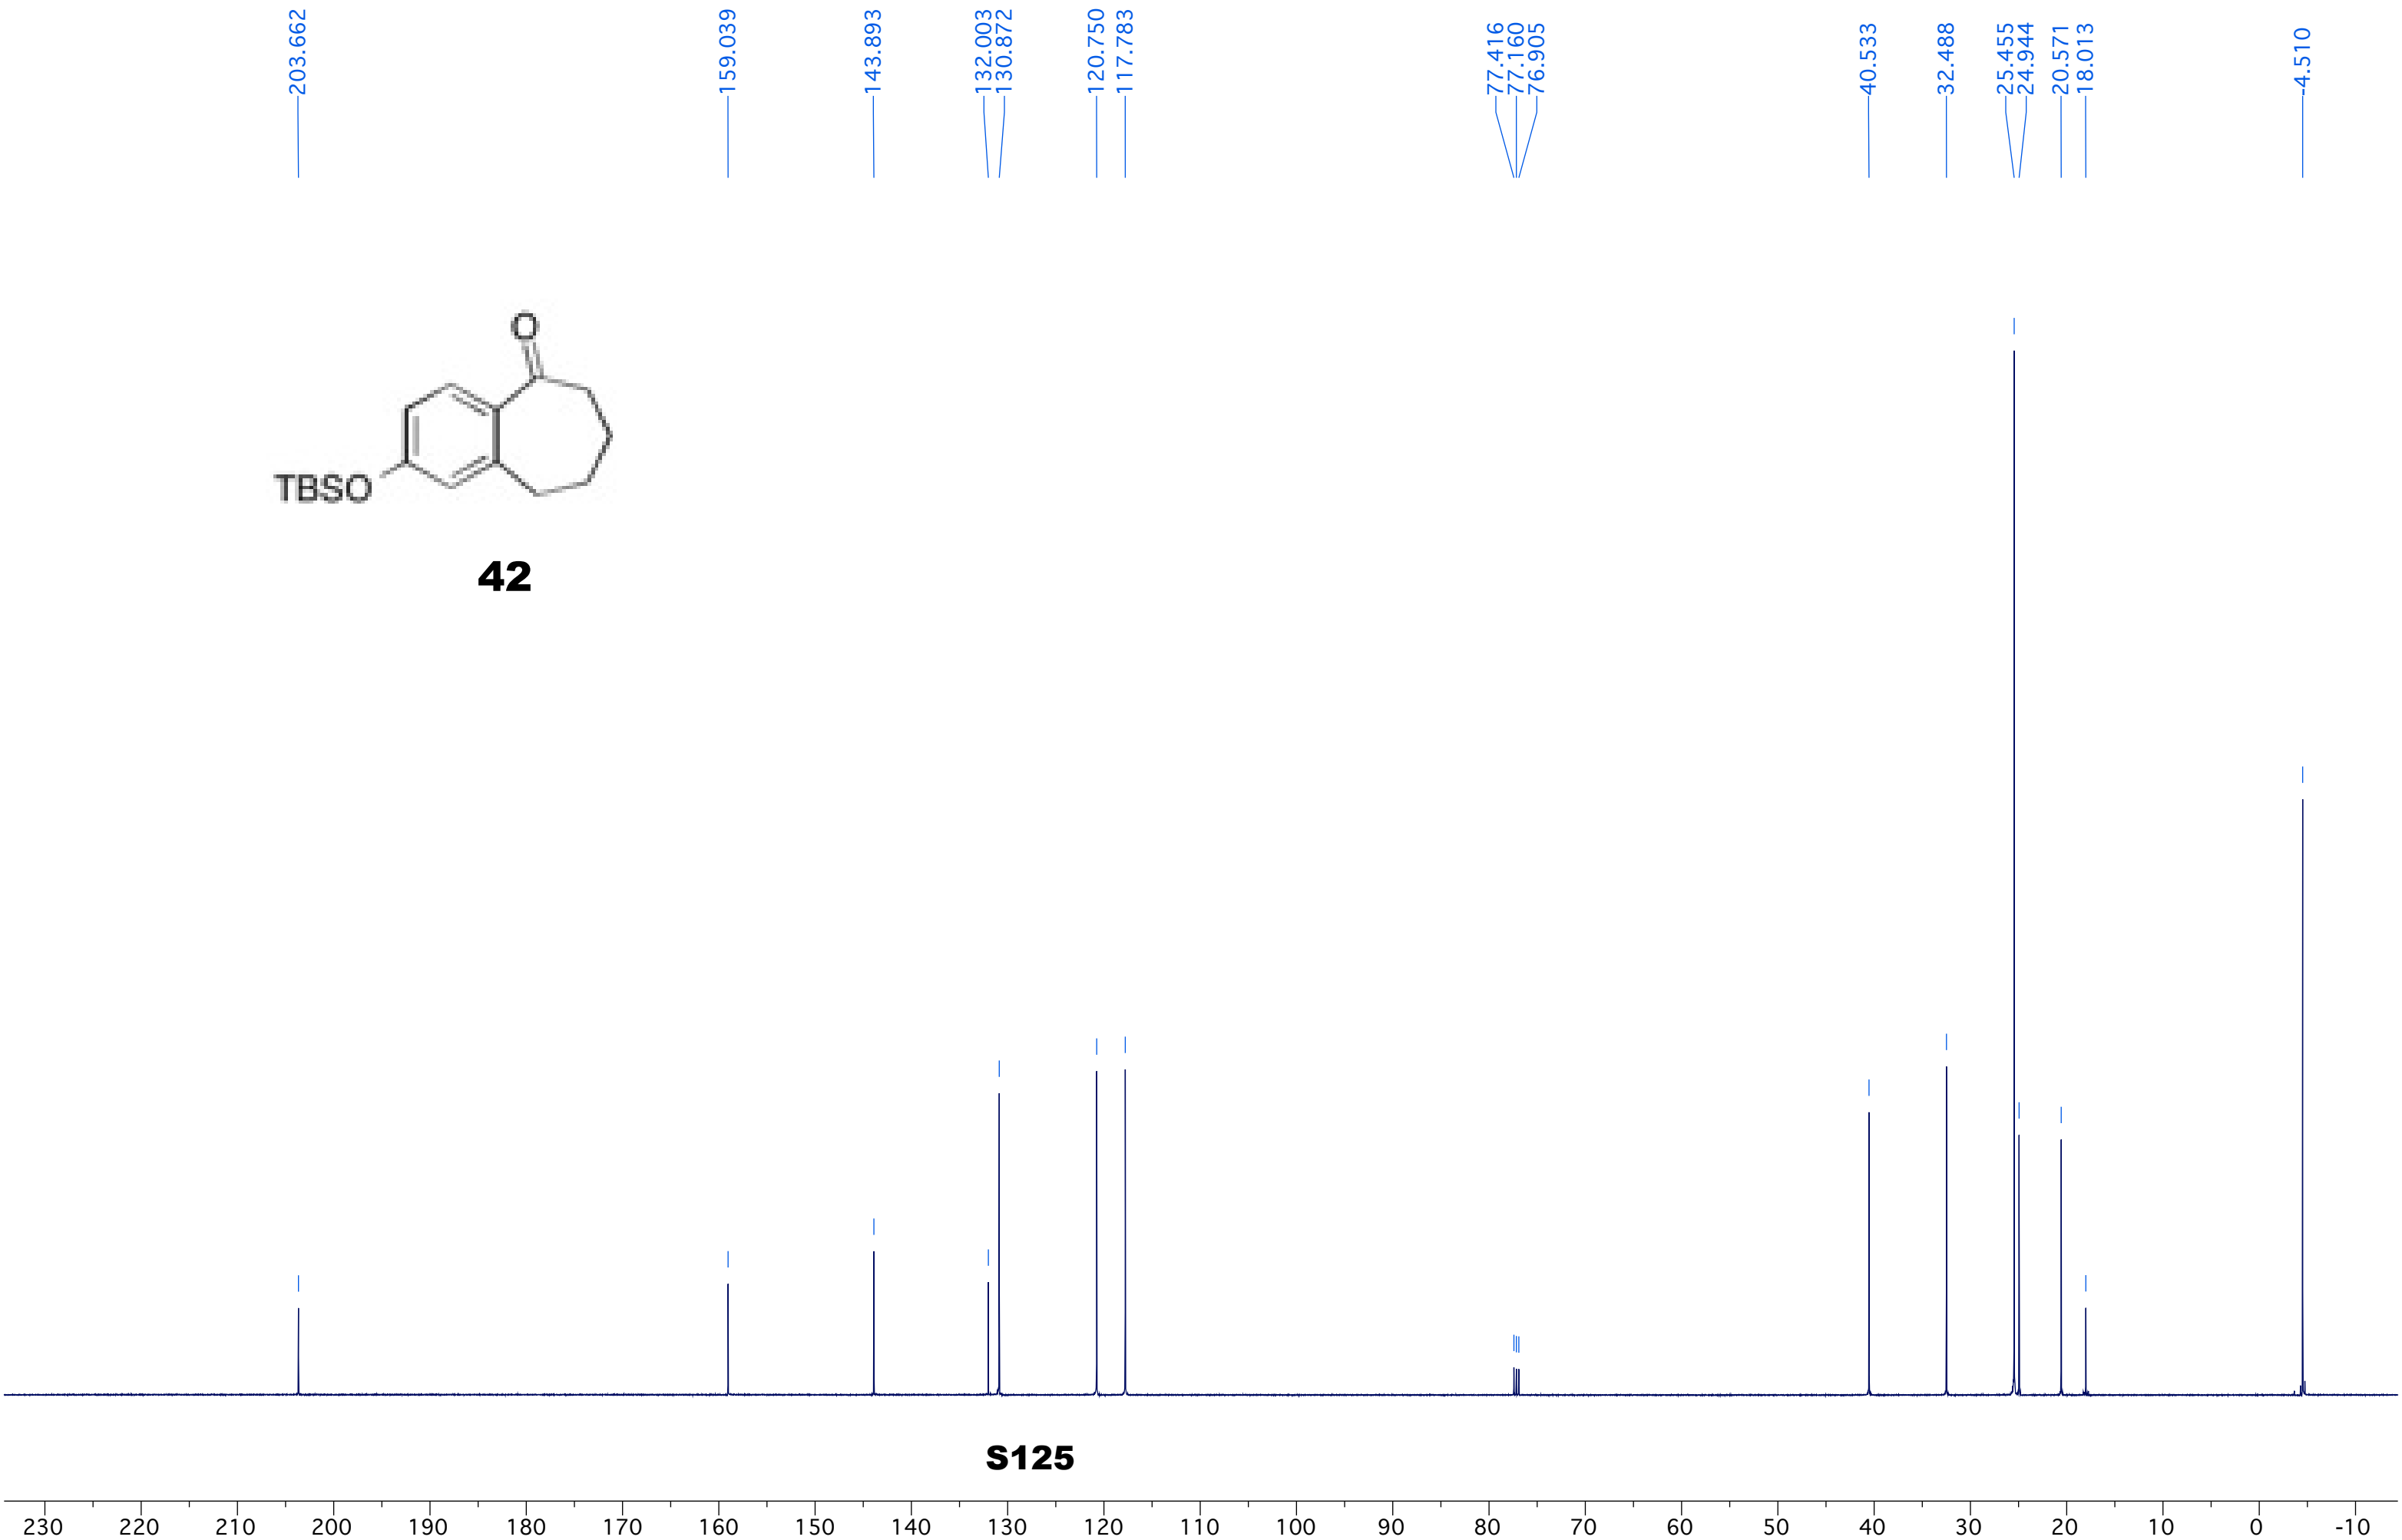

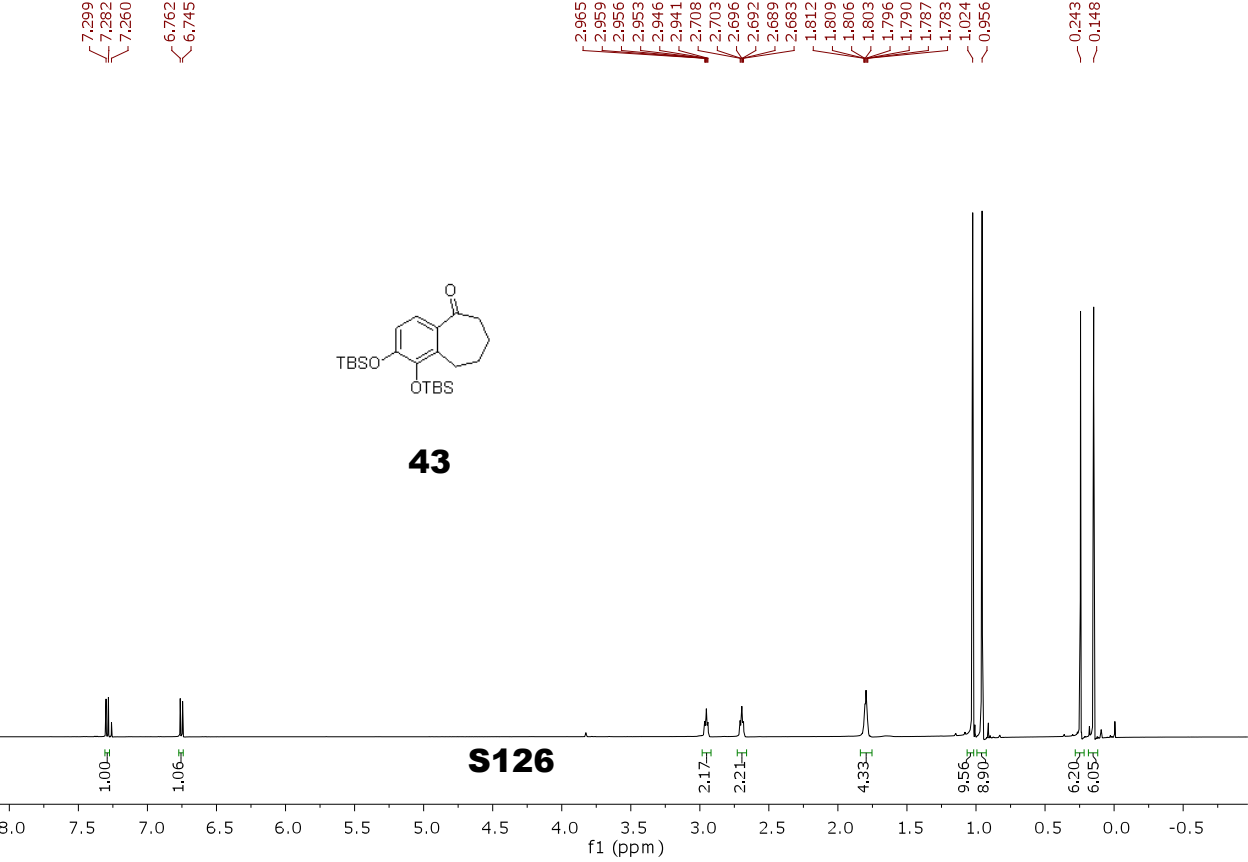

<sup>13</sup>C NMR (CDCl<sub>3</sub>, 126 MHz) of Compound LD-IV-63-1A

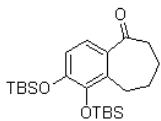

**43**

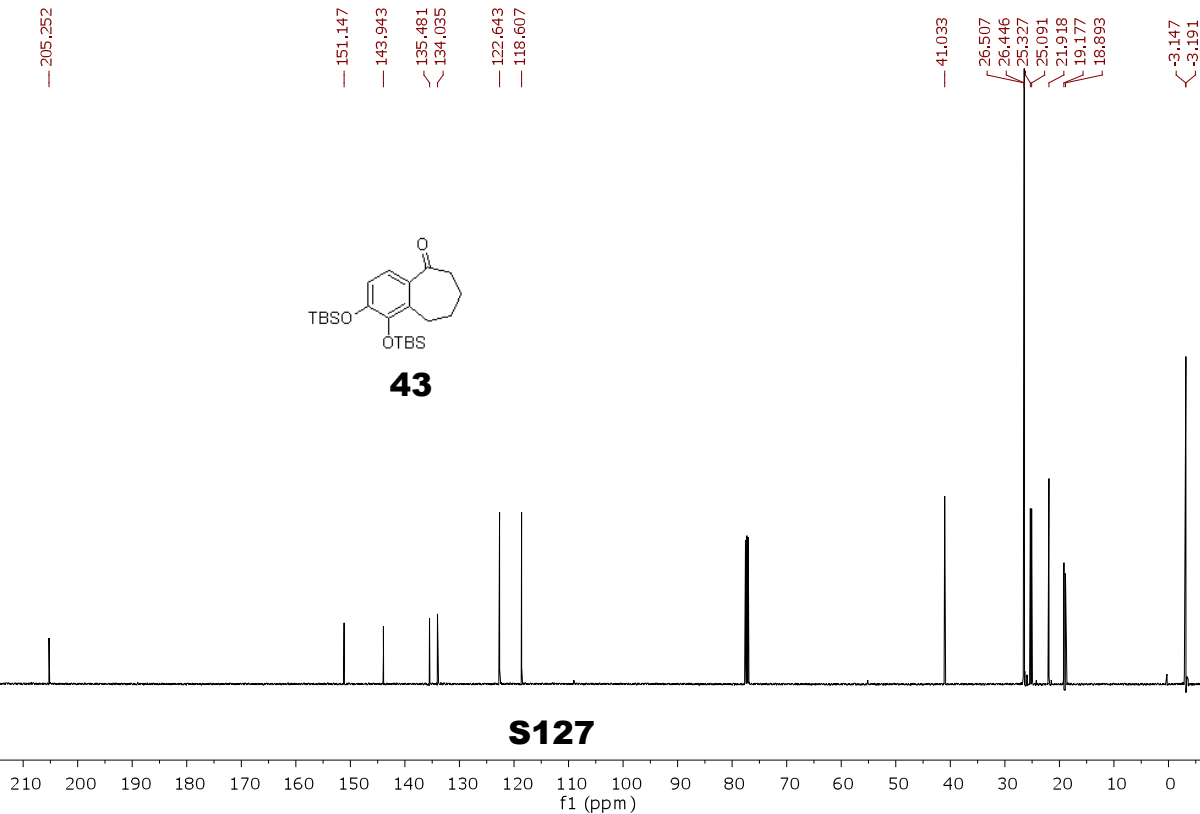

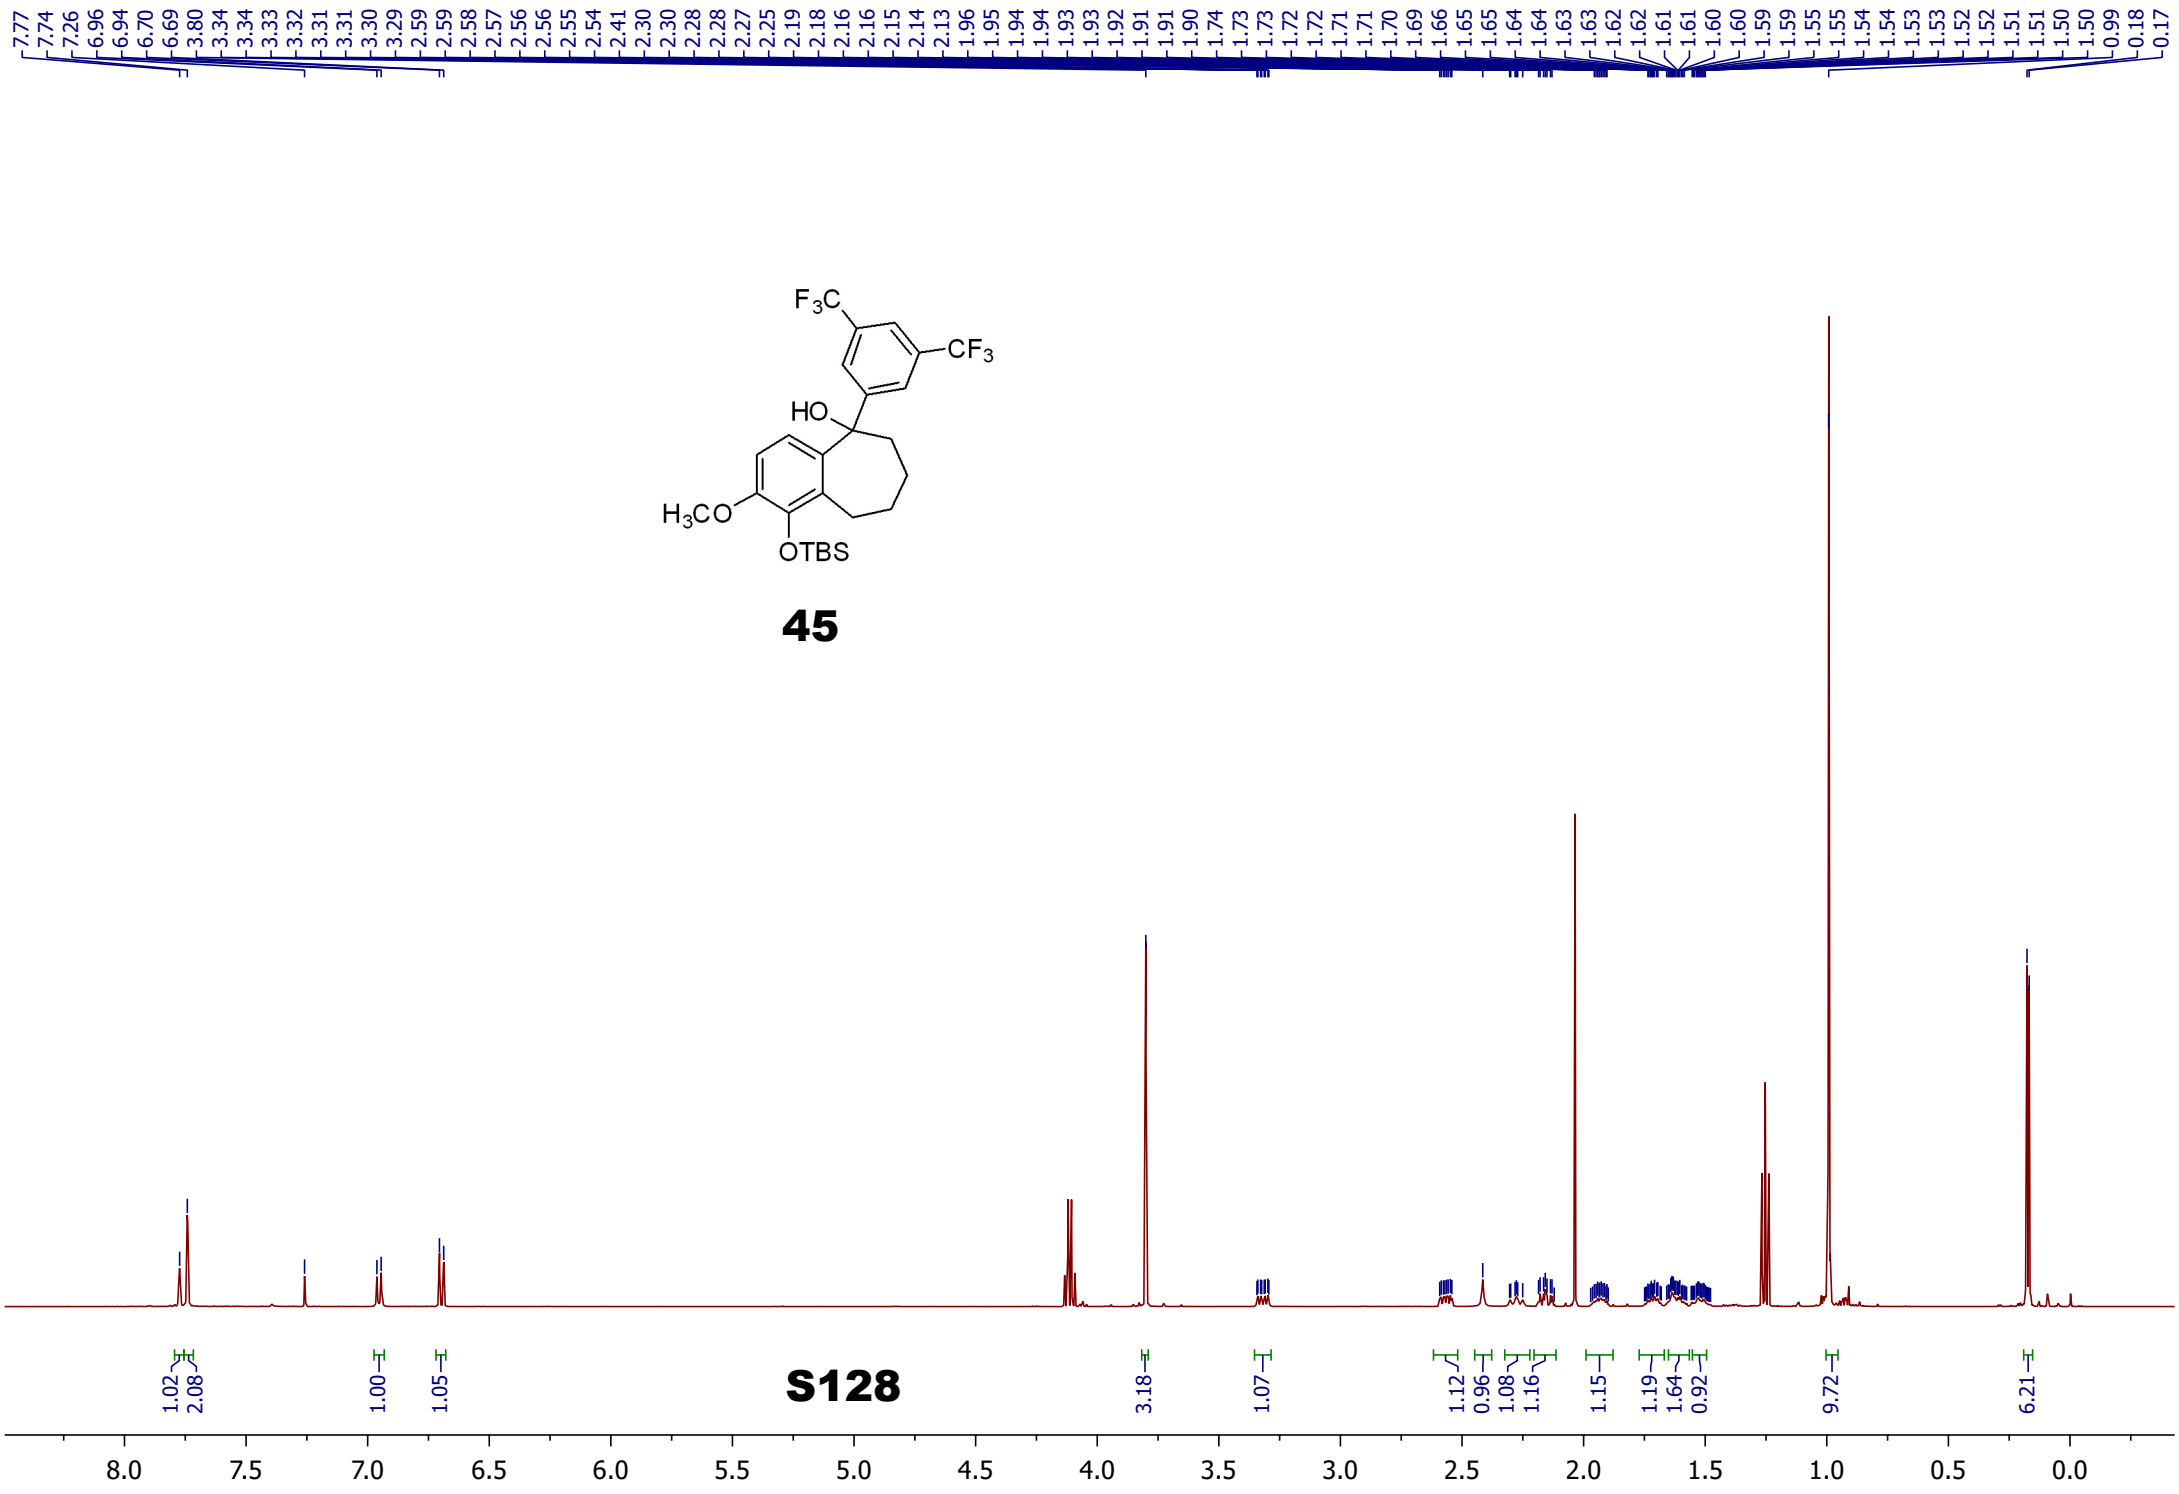

**S128**



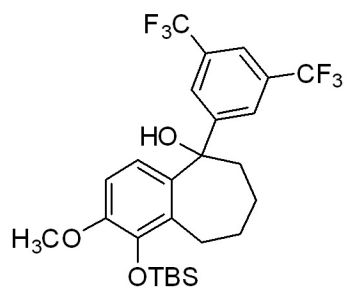

**45**

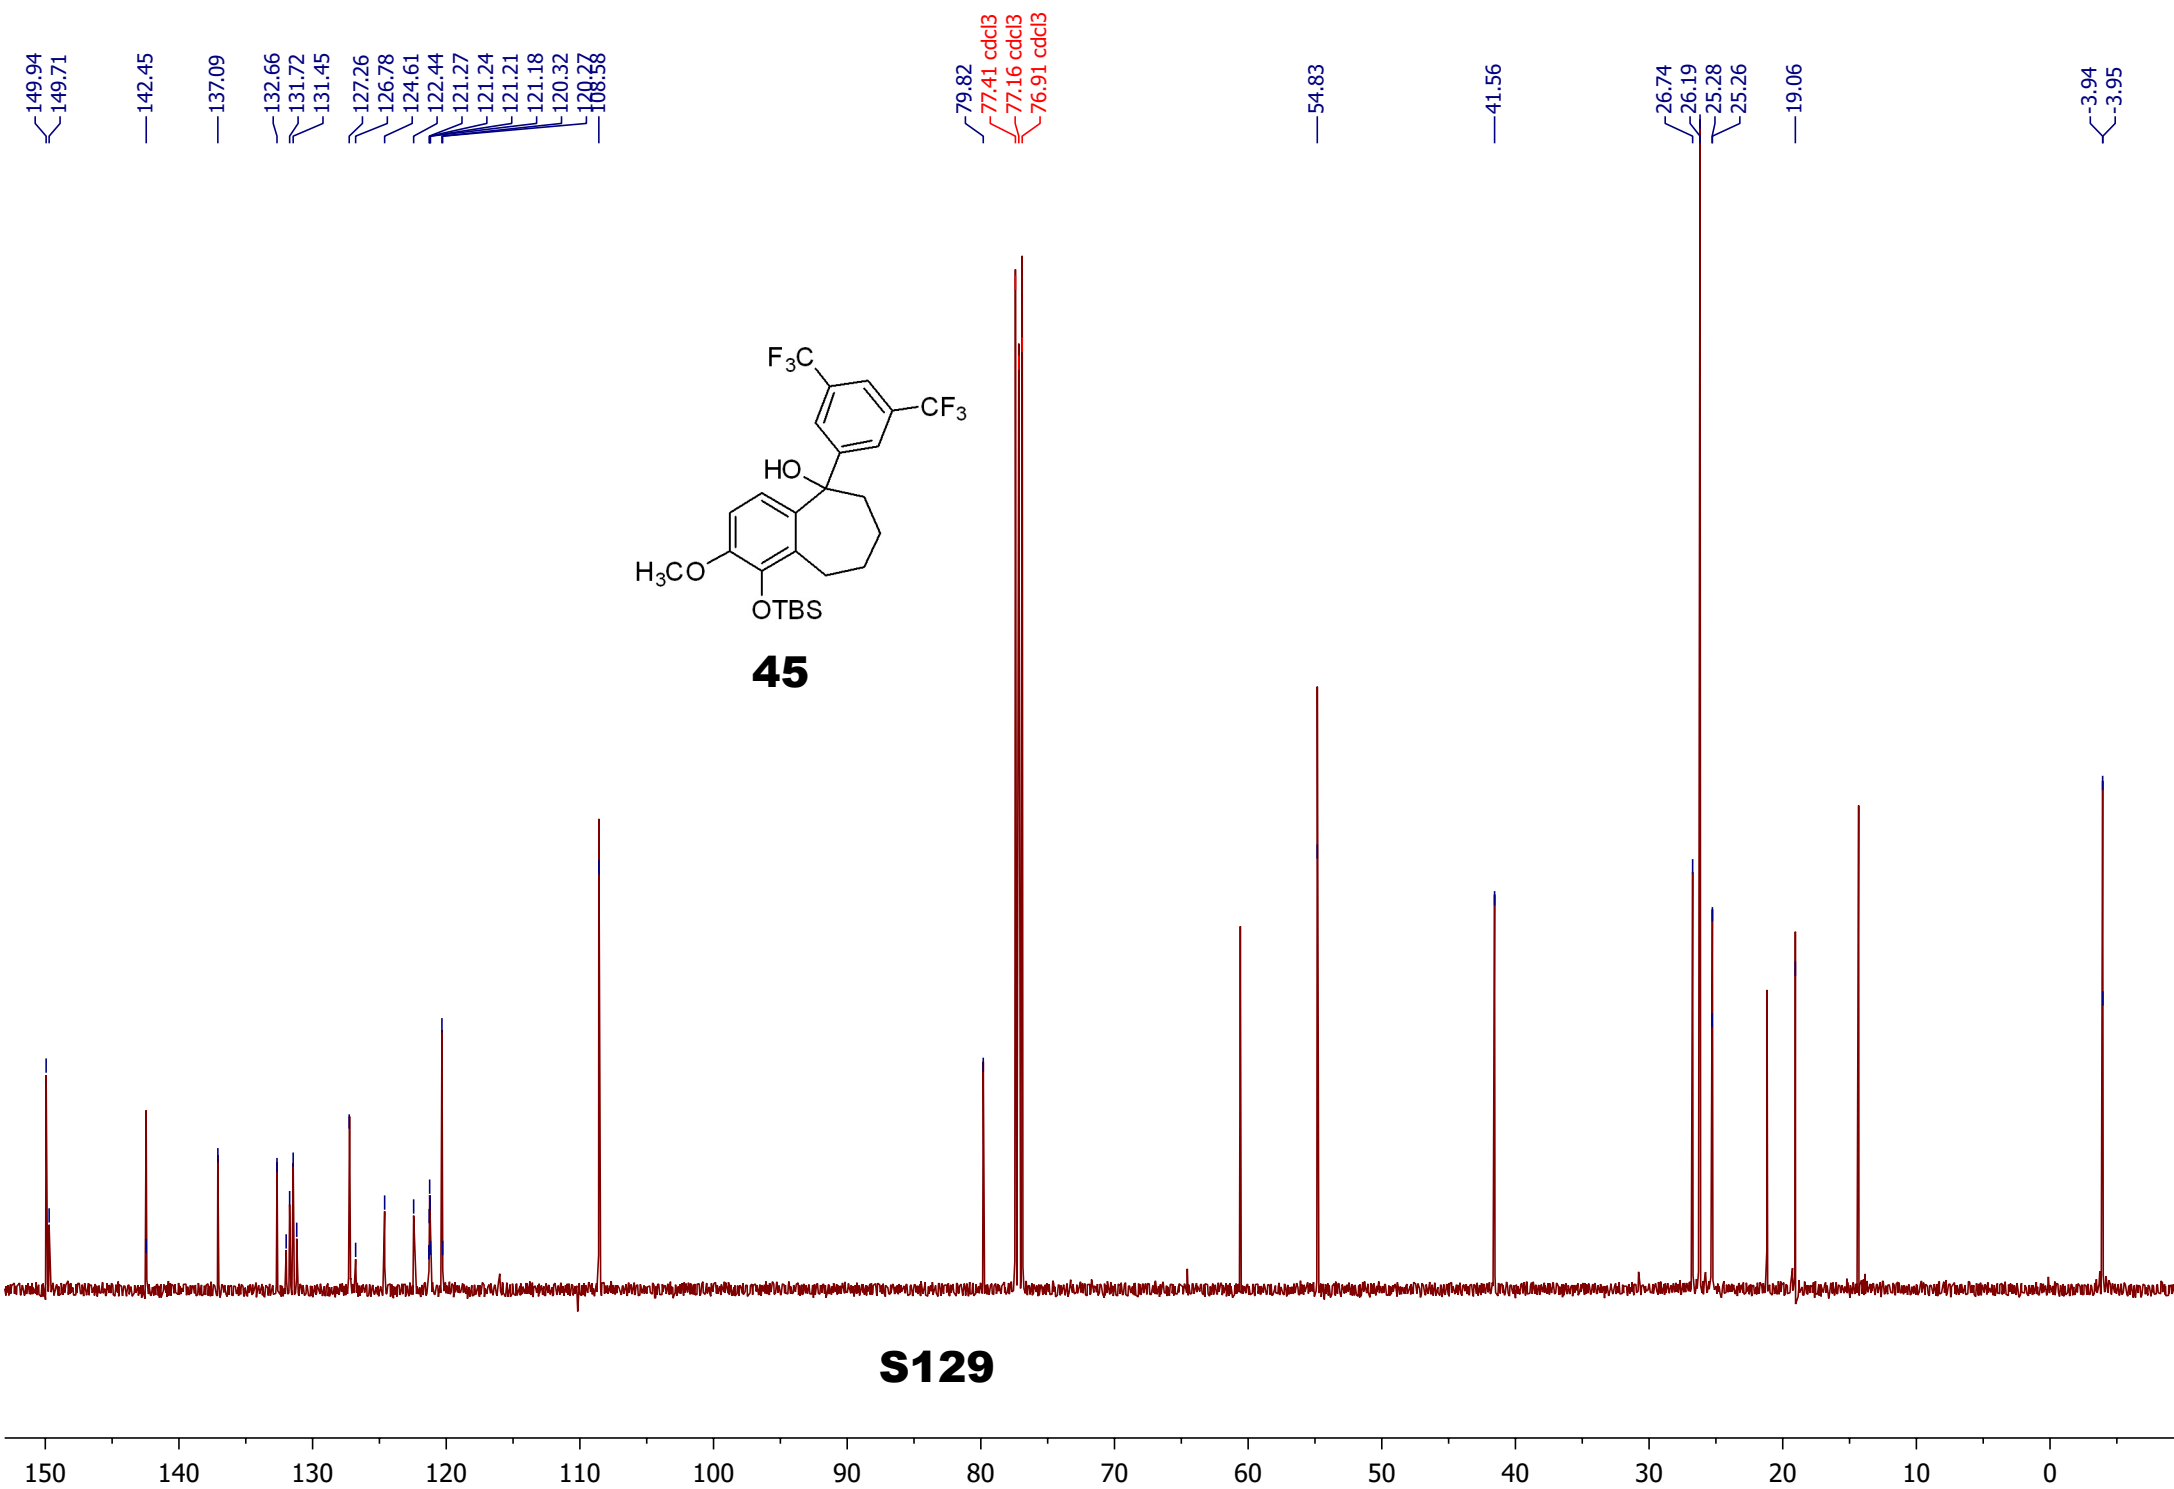

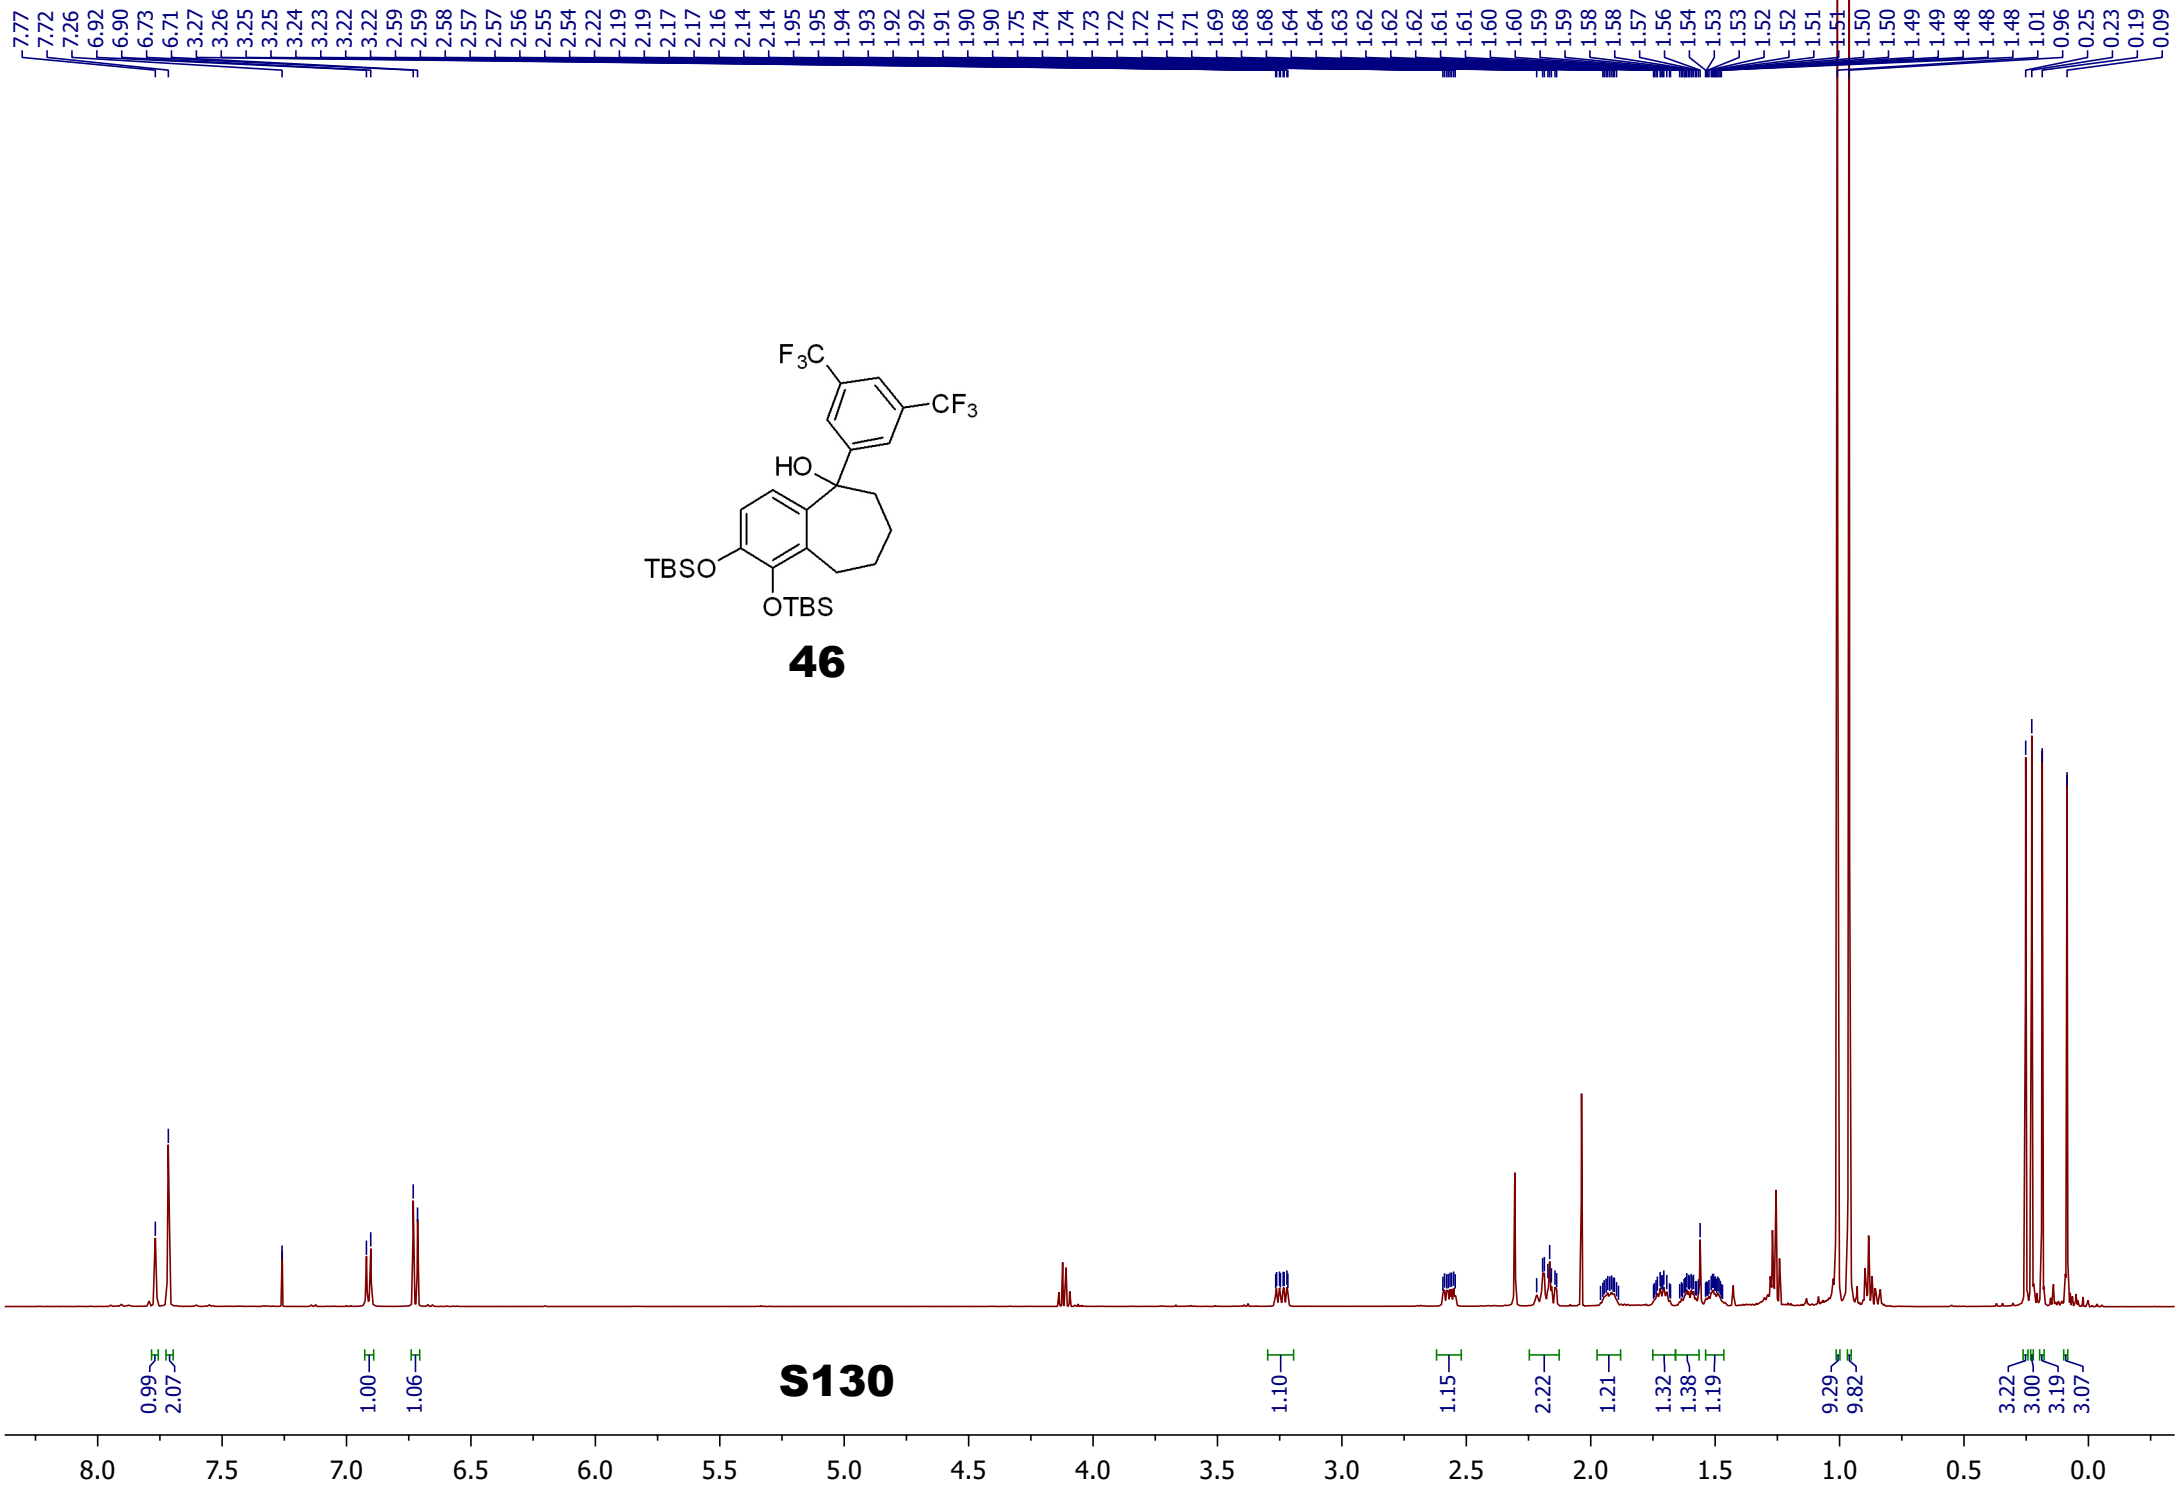

149.72  
147.15  
144.29

137.59  
133.94  
132.01  
131.75  
131.49  
131.22  
127.23  
126.77  
124.60  
122.43  
121.35  
121.32  
121.29  
121.26  
121.23  
120.63  
120.26  
118.24

79.82  
77.41 cdc13  
77.16 cdc13  
76.91 cdc13

41.22

26.74  
26.39  
26.35  
25.86  
25.17  
19.03  
18.73

-3.13  
-3.21  
-3.45  
-3.91

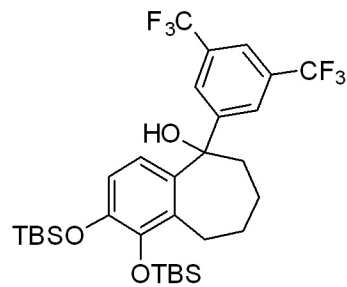

**46**

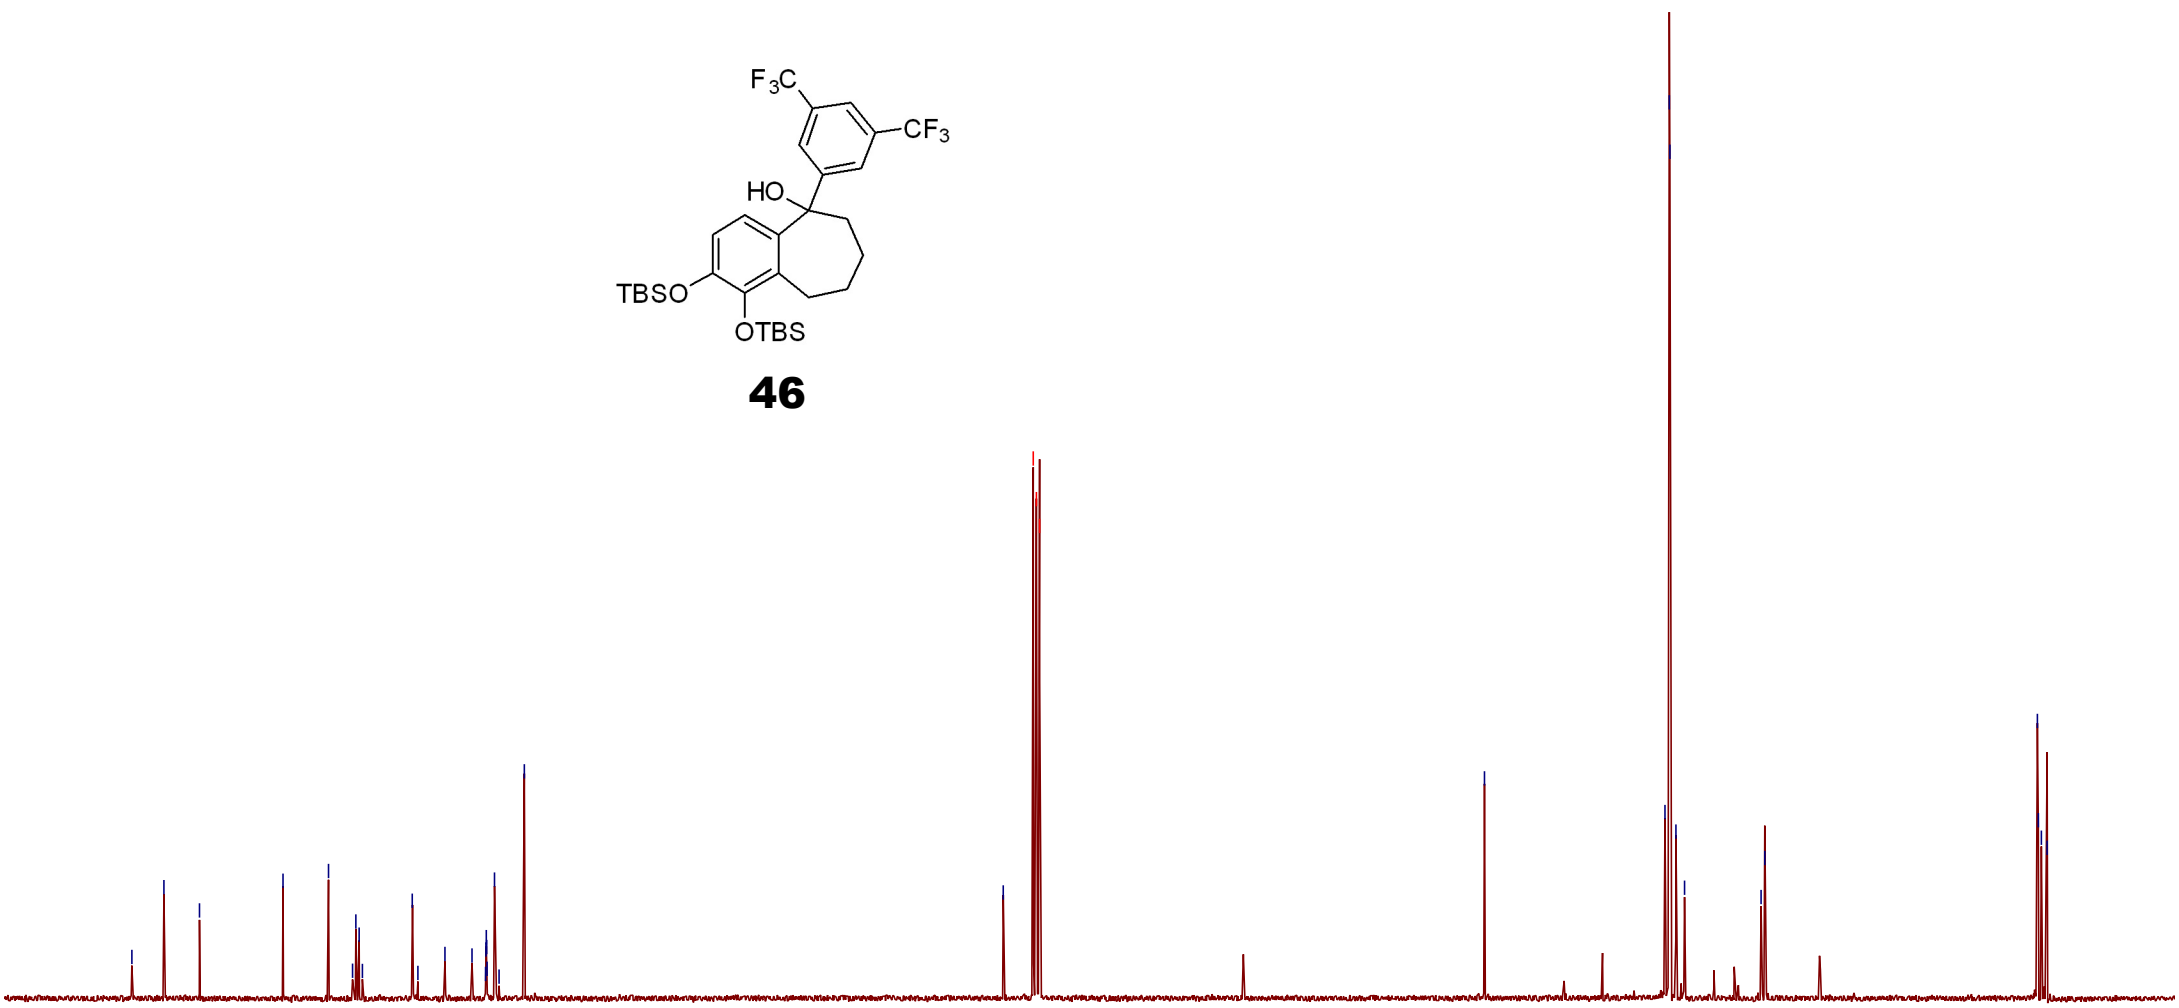

**S131**

150 140 130 120 110 100 90 80 70 60 50 40 30 20 10 0 -10

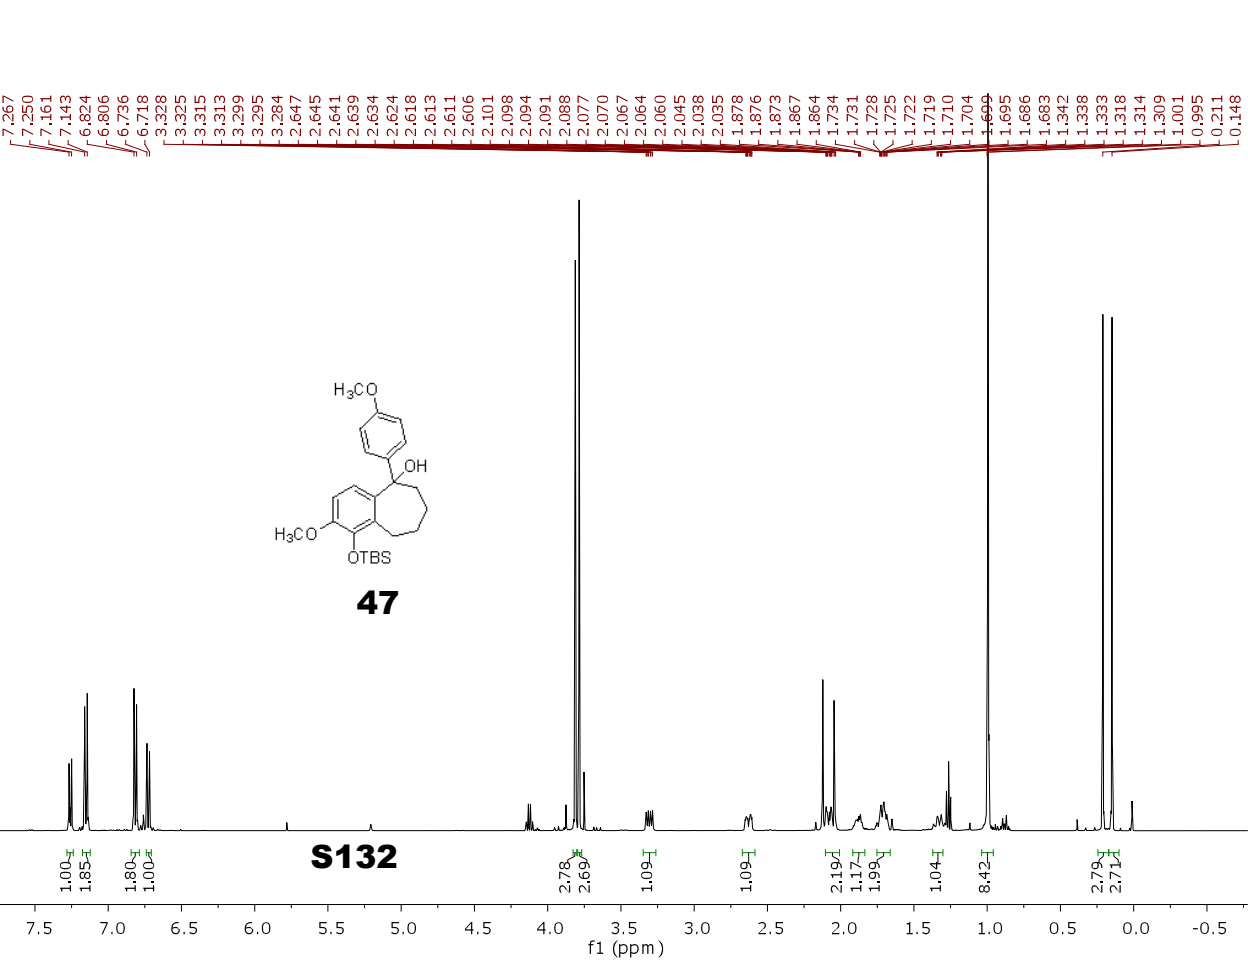

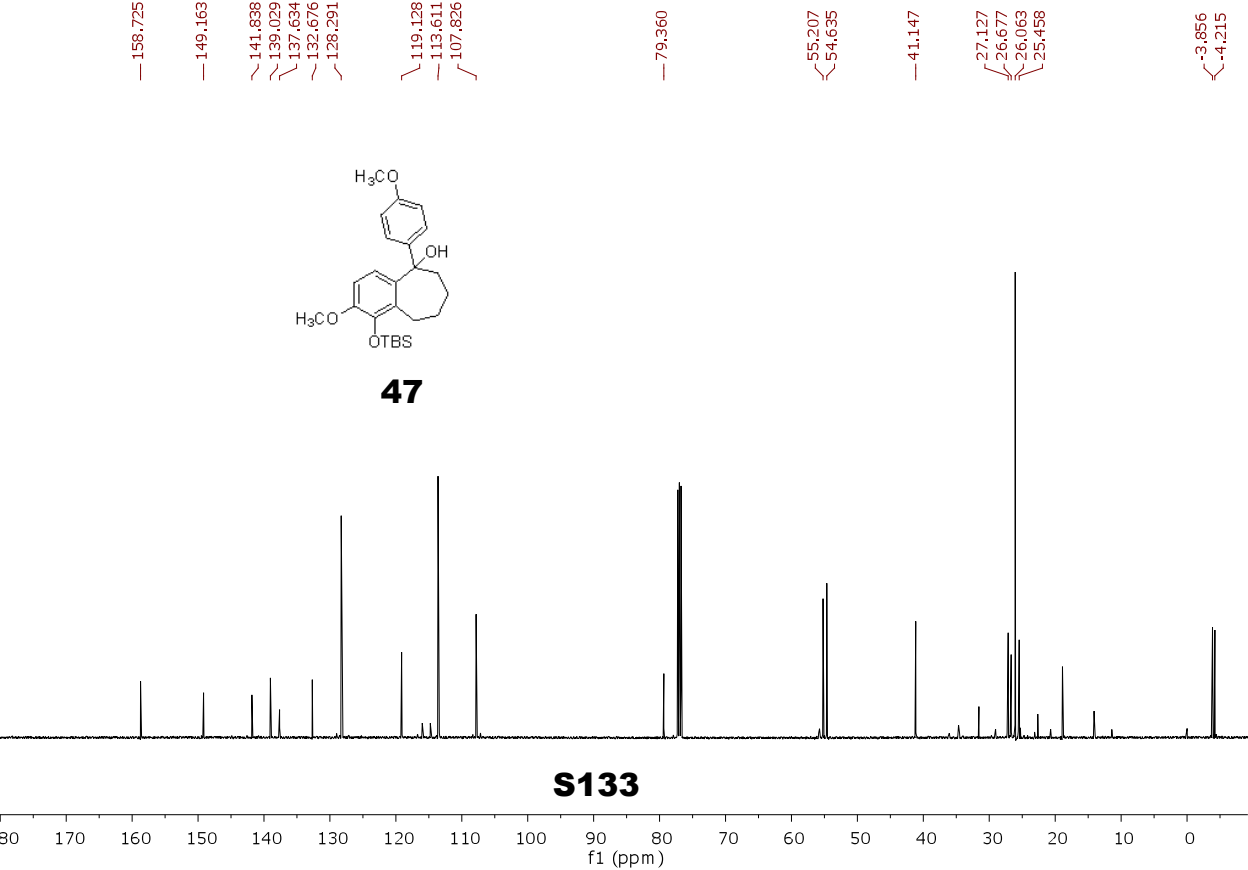

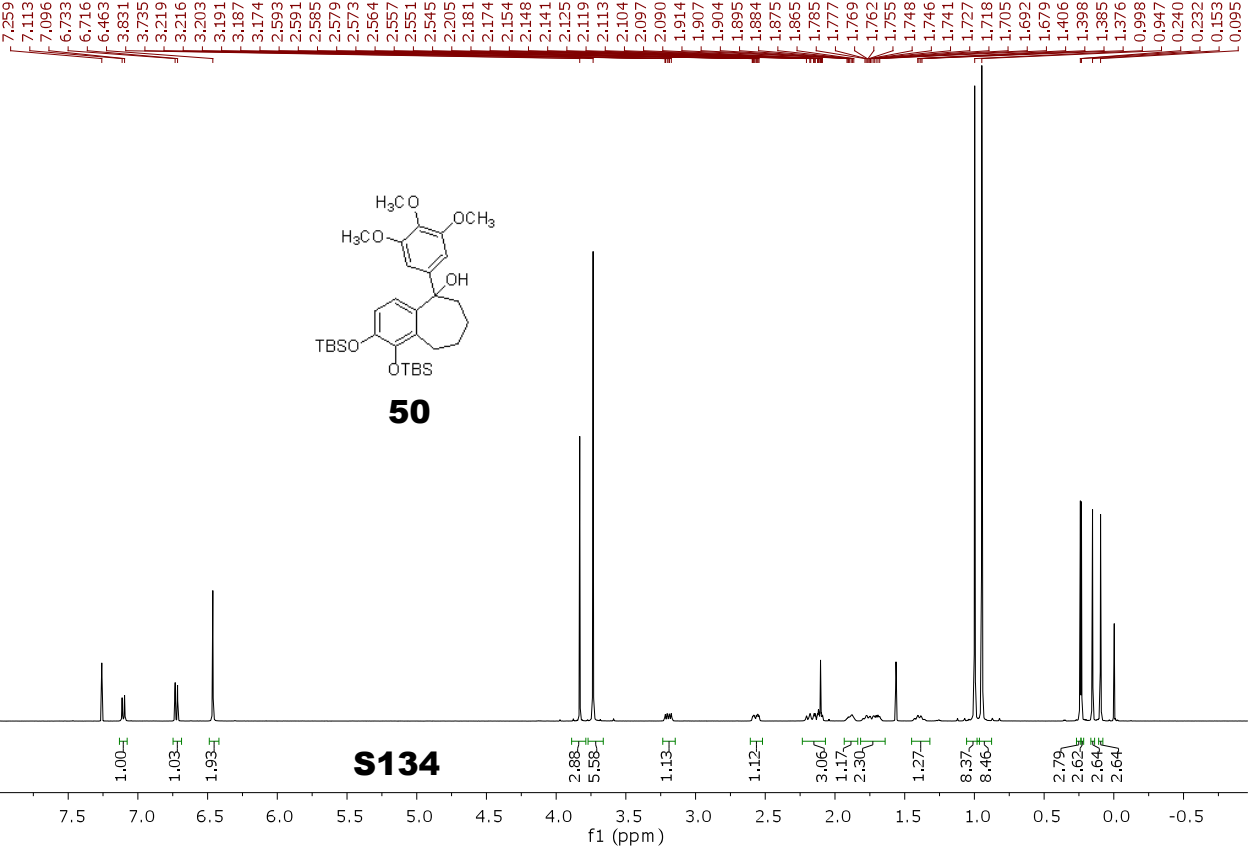

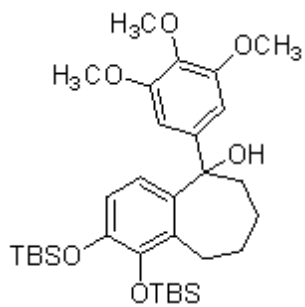

**50**

— 152.920  
— 146.370  
— 143.675  
— 141.764  
— 139.131  
— 137.066  
— 133.912

— 120.000  
— 117.457

— 104.119

— 79.965

— 60.808

— 55.960

— 40.867

— 26.841  
— 26.301  
— 26.226  
— 26.124  
— 25.864  
— 18.912  
— 18.595

— 3.381  
— 3.397  
— 3.606

**S135**

f1 (ppm)

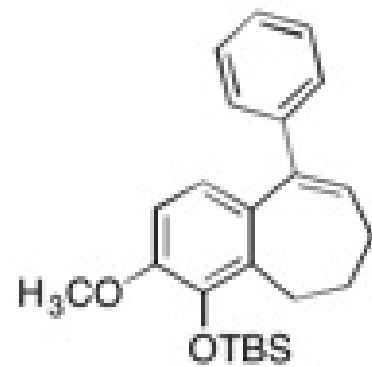

**51**

7.303  
7.294  
7.272  
7.263  
7.254  
6.705  
6.689  
6.601  
6.584  
6.383  
6.368  
6.354

3.843  
3.812

2.807  
2.793  
2.779

2.156  
2.142  
2.128  
2.114  
2.100  
2.005  
1.990  
1.976  
1.962

1.070

0.257

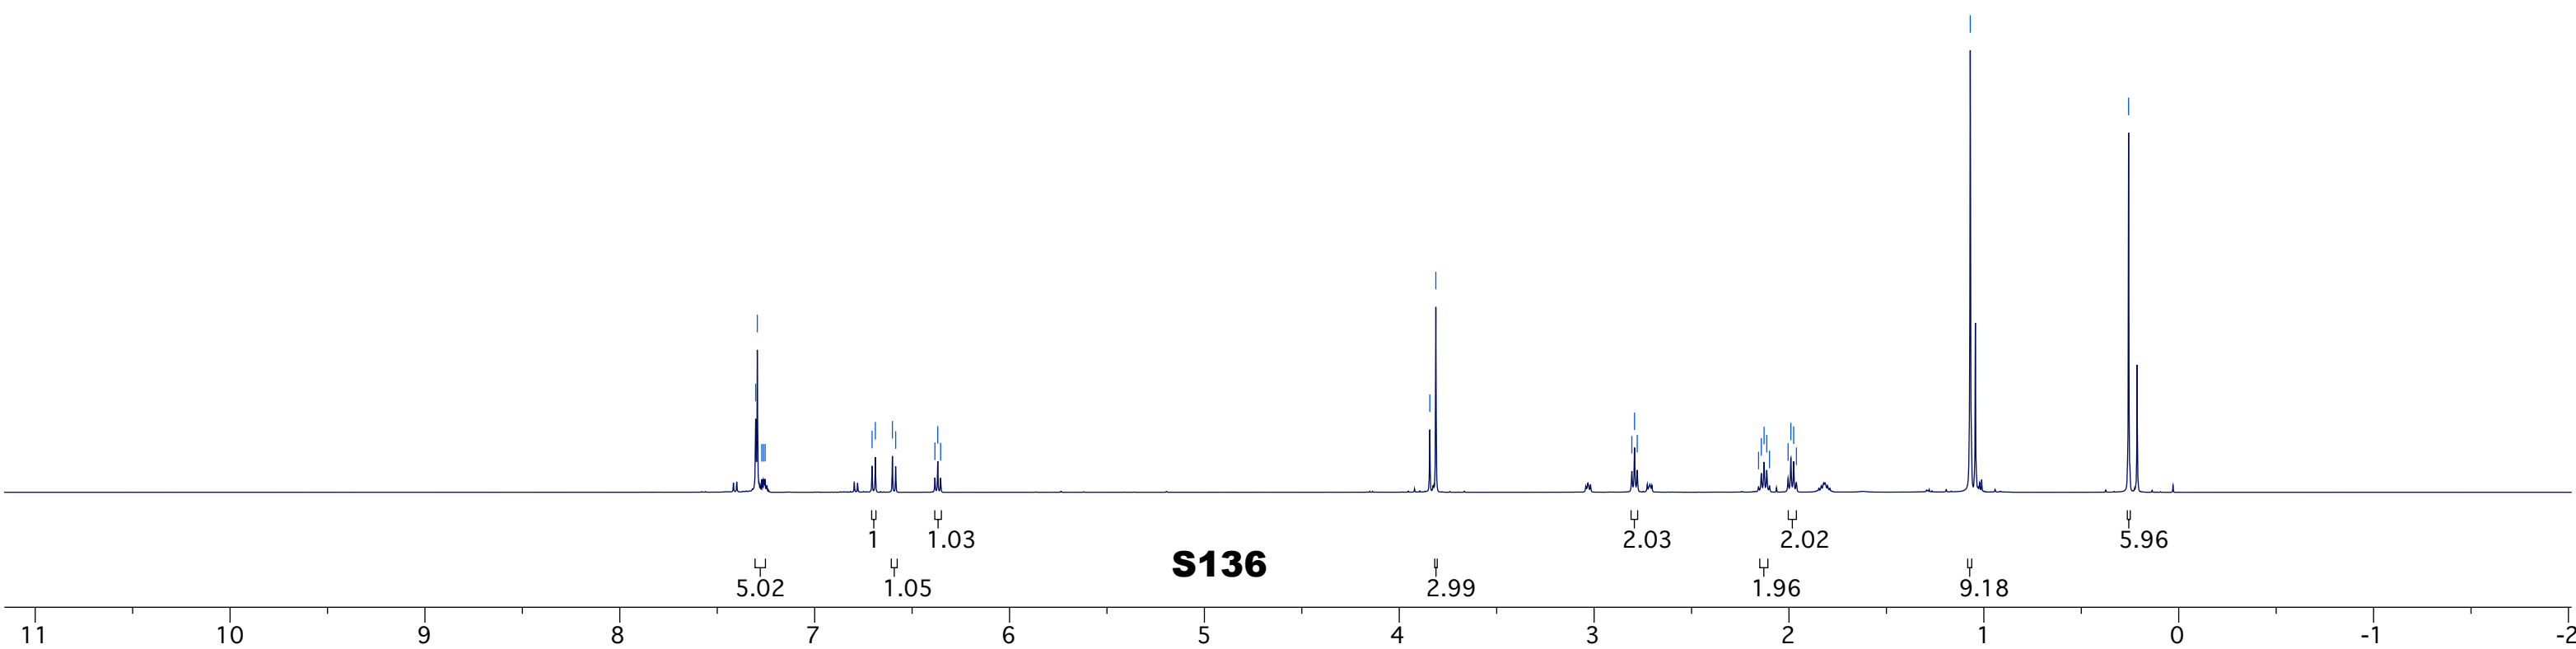



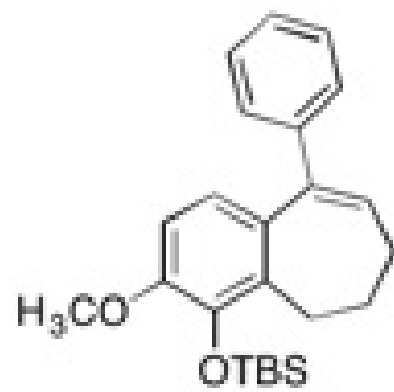

**51**

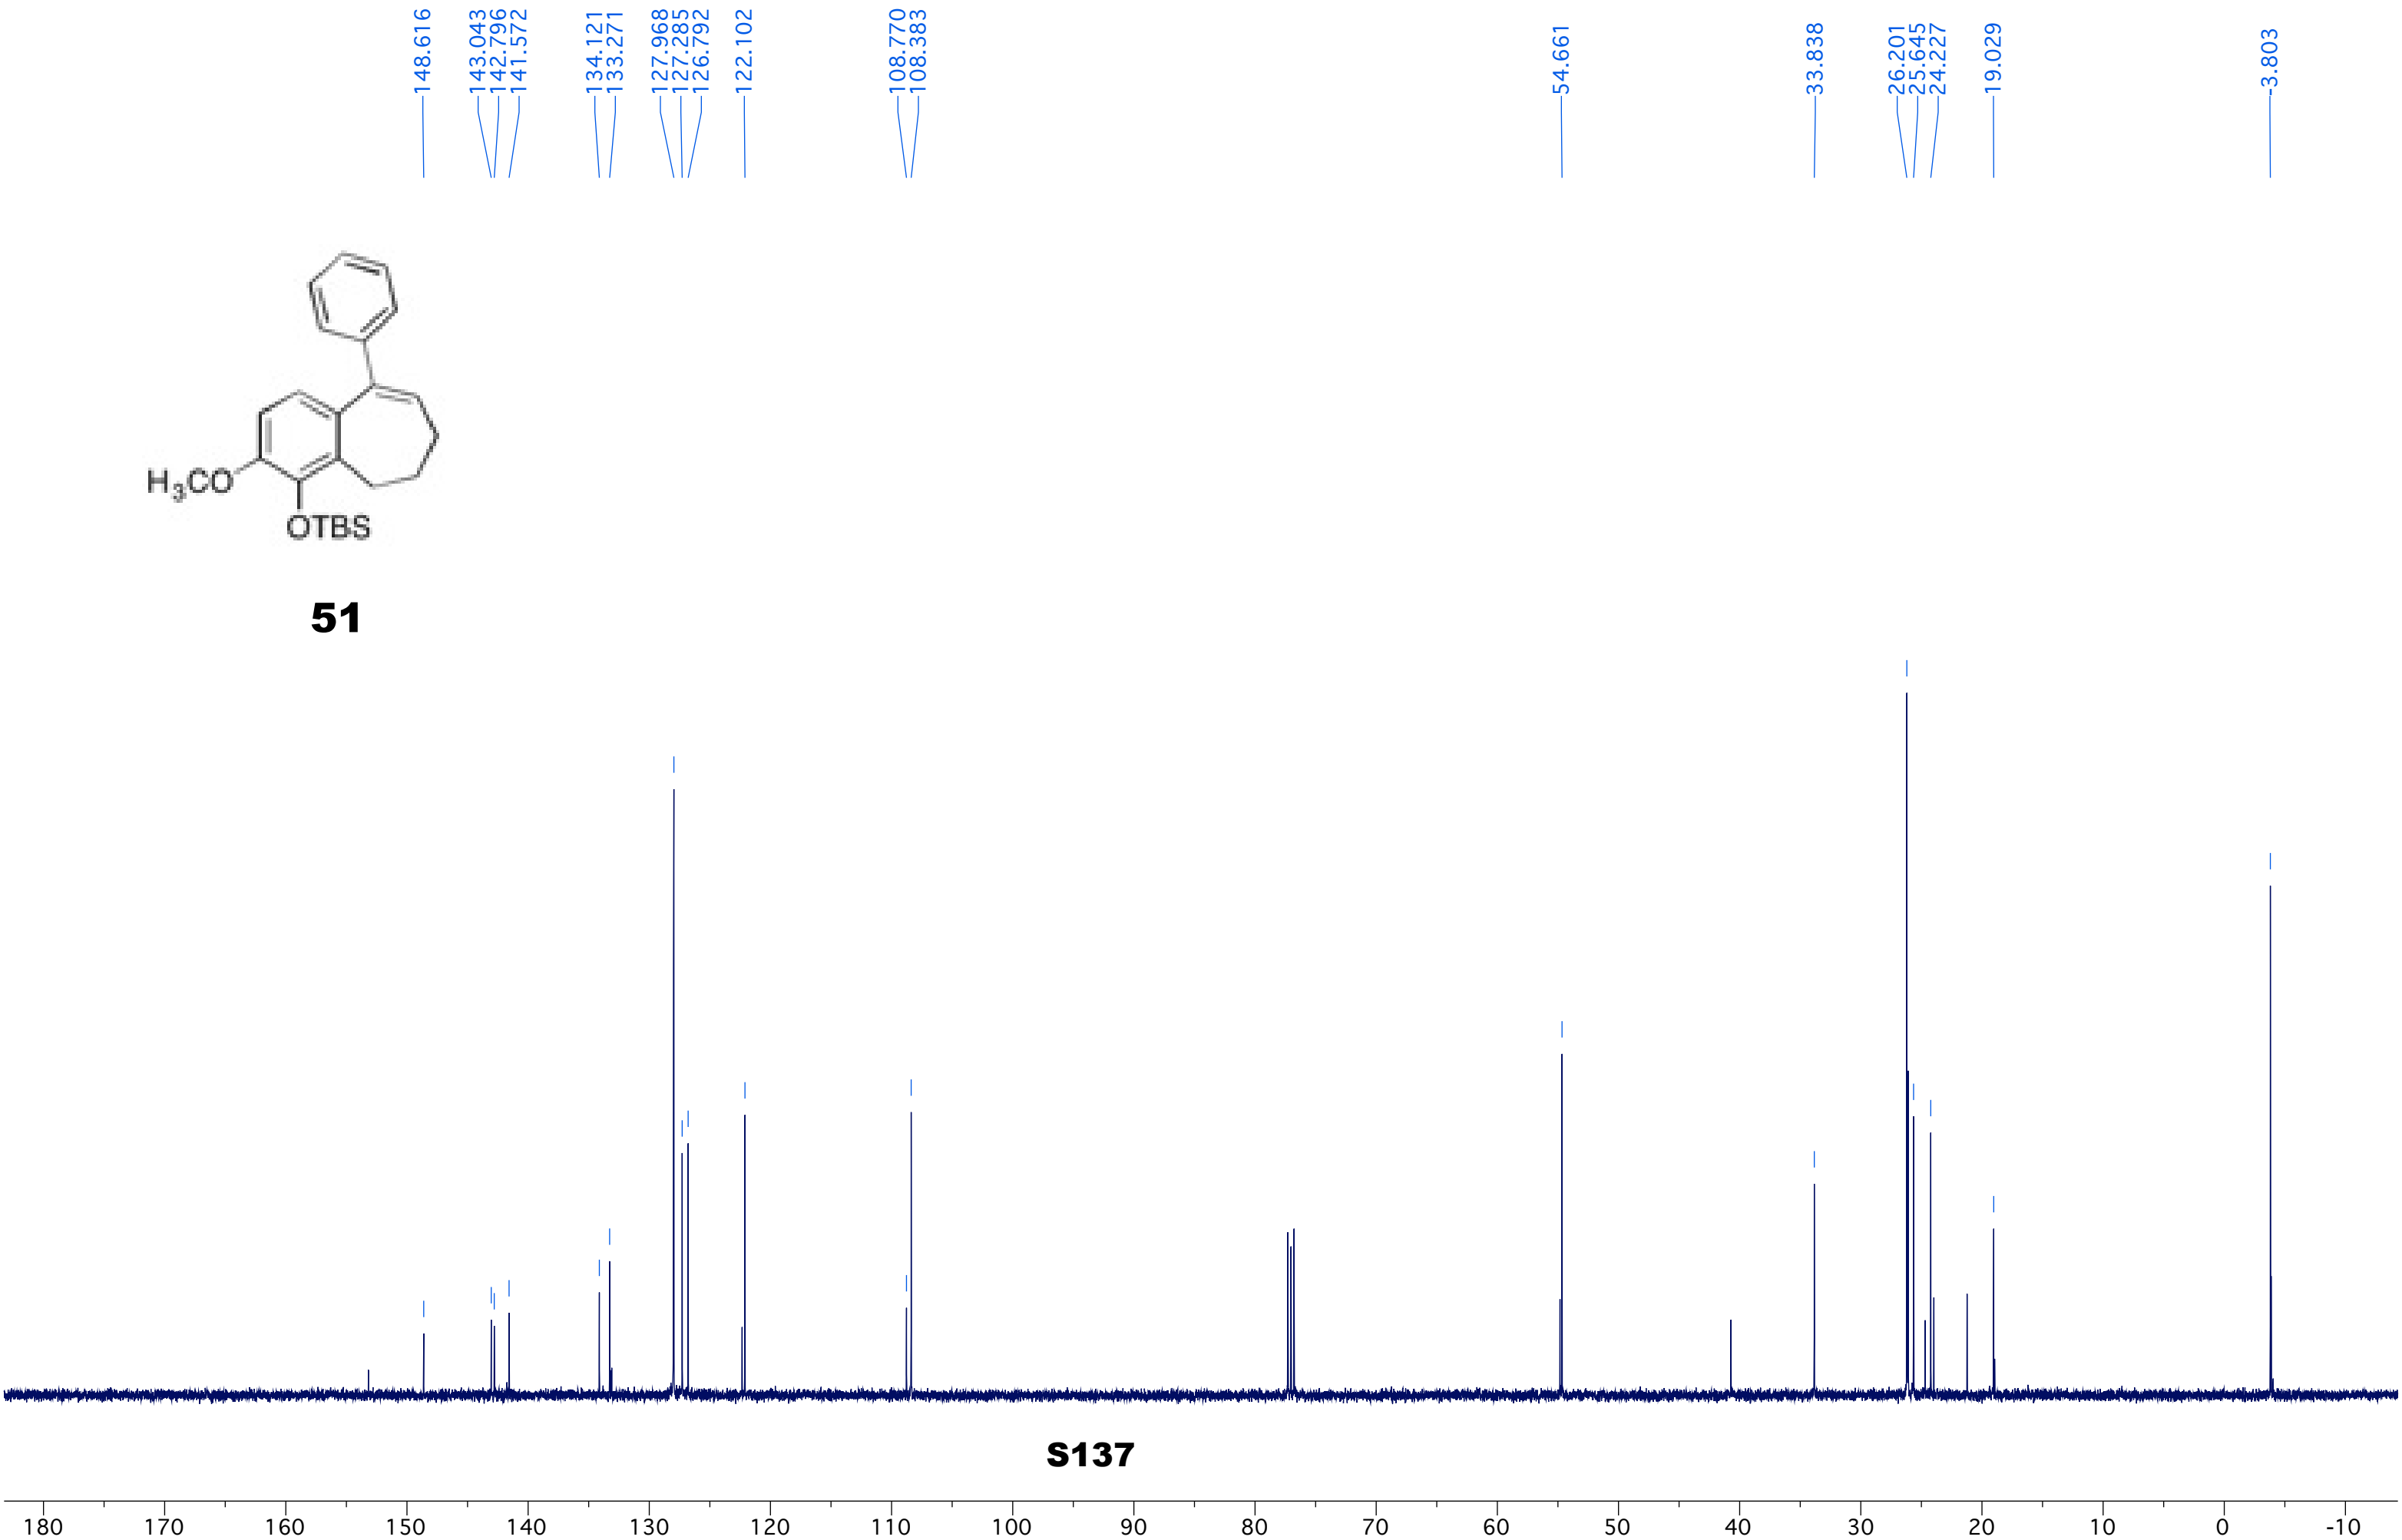

7.77  
7.74

6.74  
6.72  
6.51  
6.50  
6.50  
6.49

3.84

2.82  
2.80  
2.79  
2.19  
2.18  
2.16  
2.15  
2.13  
2.06  
2.05  
2.04  
2.02

1.07

0.27

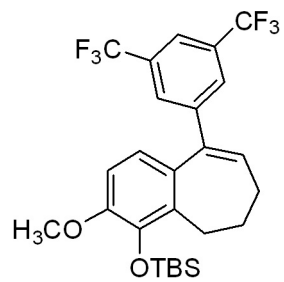

**52**

0.95  
2.01

1.00  
0.99  
1.04

3.17

2.10

2.14  
2.11

9.56

6.19

**S138**

8.5 8.0 7.5 7.0 6.5 6.0 5.5 5.0 4.5 4.0 3.5 3.0 2.5 2.0 1.5 1.0 0.5 0.0

149.34  
145.02  
142.14  
141.12  
133.47  
132.52  
131.67  
131.41  
131.14  
130.84  
128.01  
127.98  
127.95  
124.74  
122.57  
121.87  
121.86  
120.62  
120.59  
119.56

77.41 cdcl3  
77.16 cdcl3  
76.90 cdcl3

54.83

33.79

26.31  
26.04  
24.43

-3.64

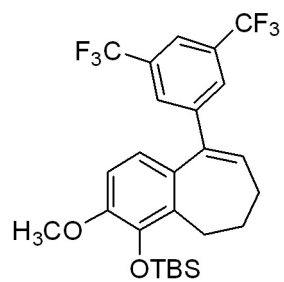

**52**

**S139**

150 140 130 120 110 100 90 80 70 60 50 40 30 20 10 0

7.75  
7.69

6.73  
6.71  
6.50  
6.49  
6.47  
6.41  
6.39

2.75  
2.73  
2.72  
2.18  
2.16  
2.15  
2.14  
2.12  
2.05  
2.04  
2.03  
2.01

1.07  
0.98

0.26  
0.23

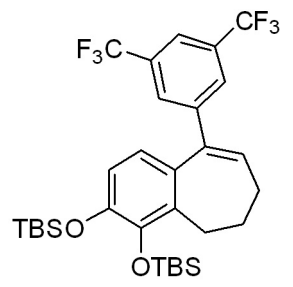

**53**

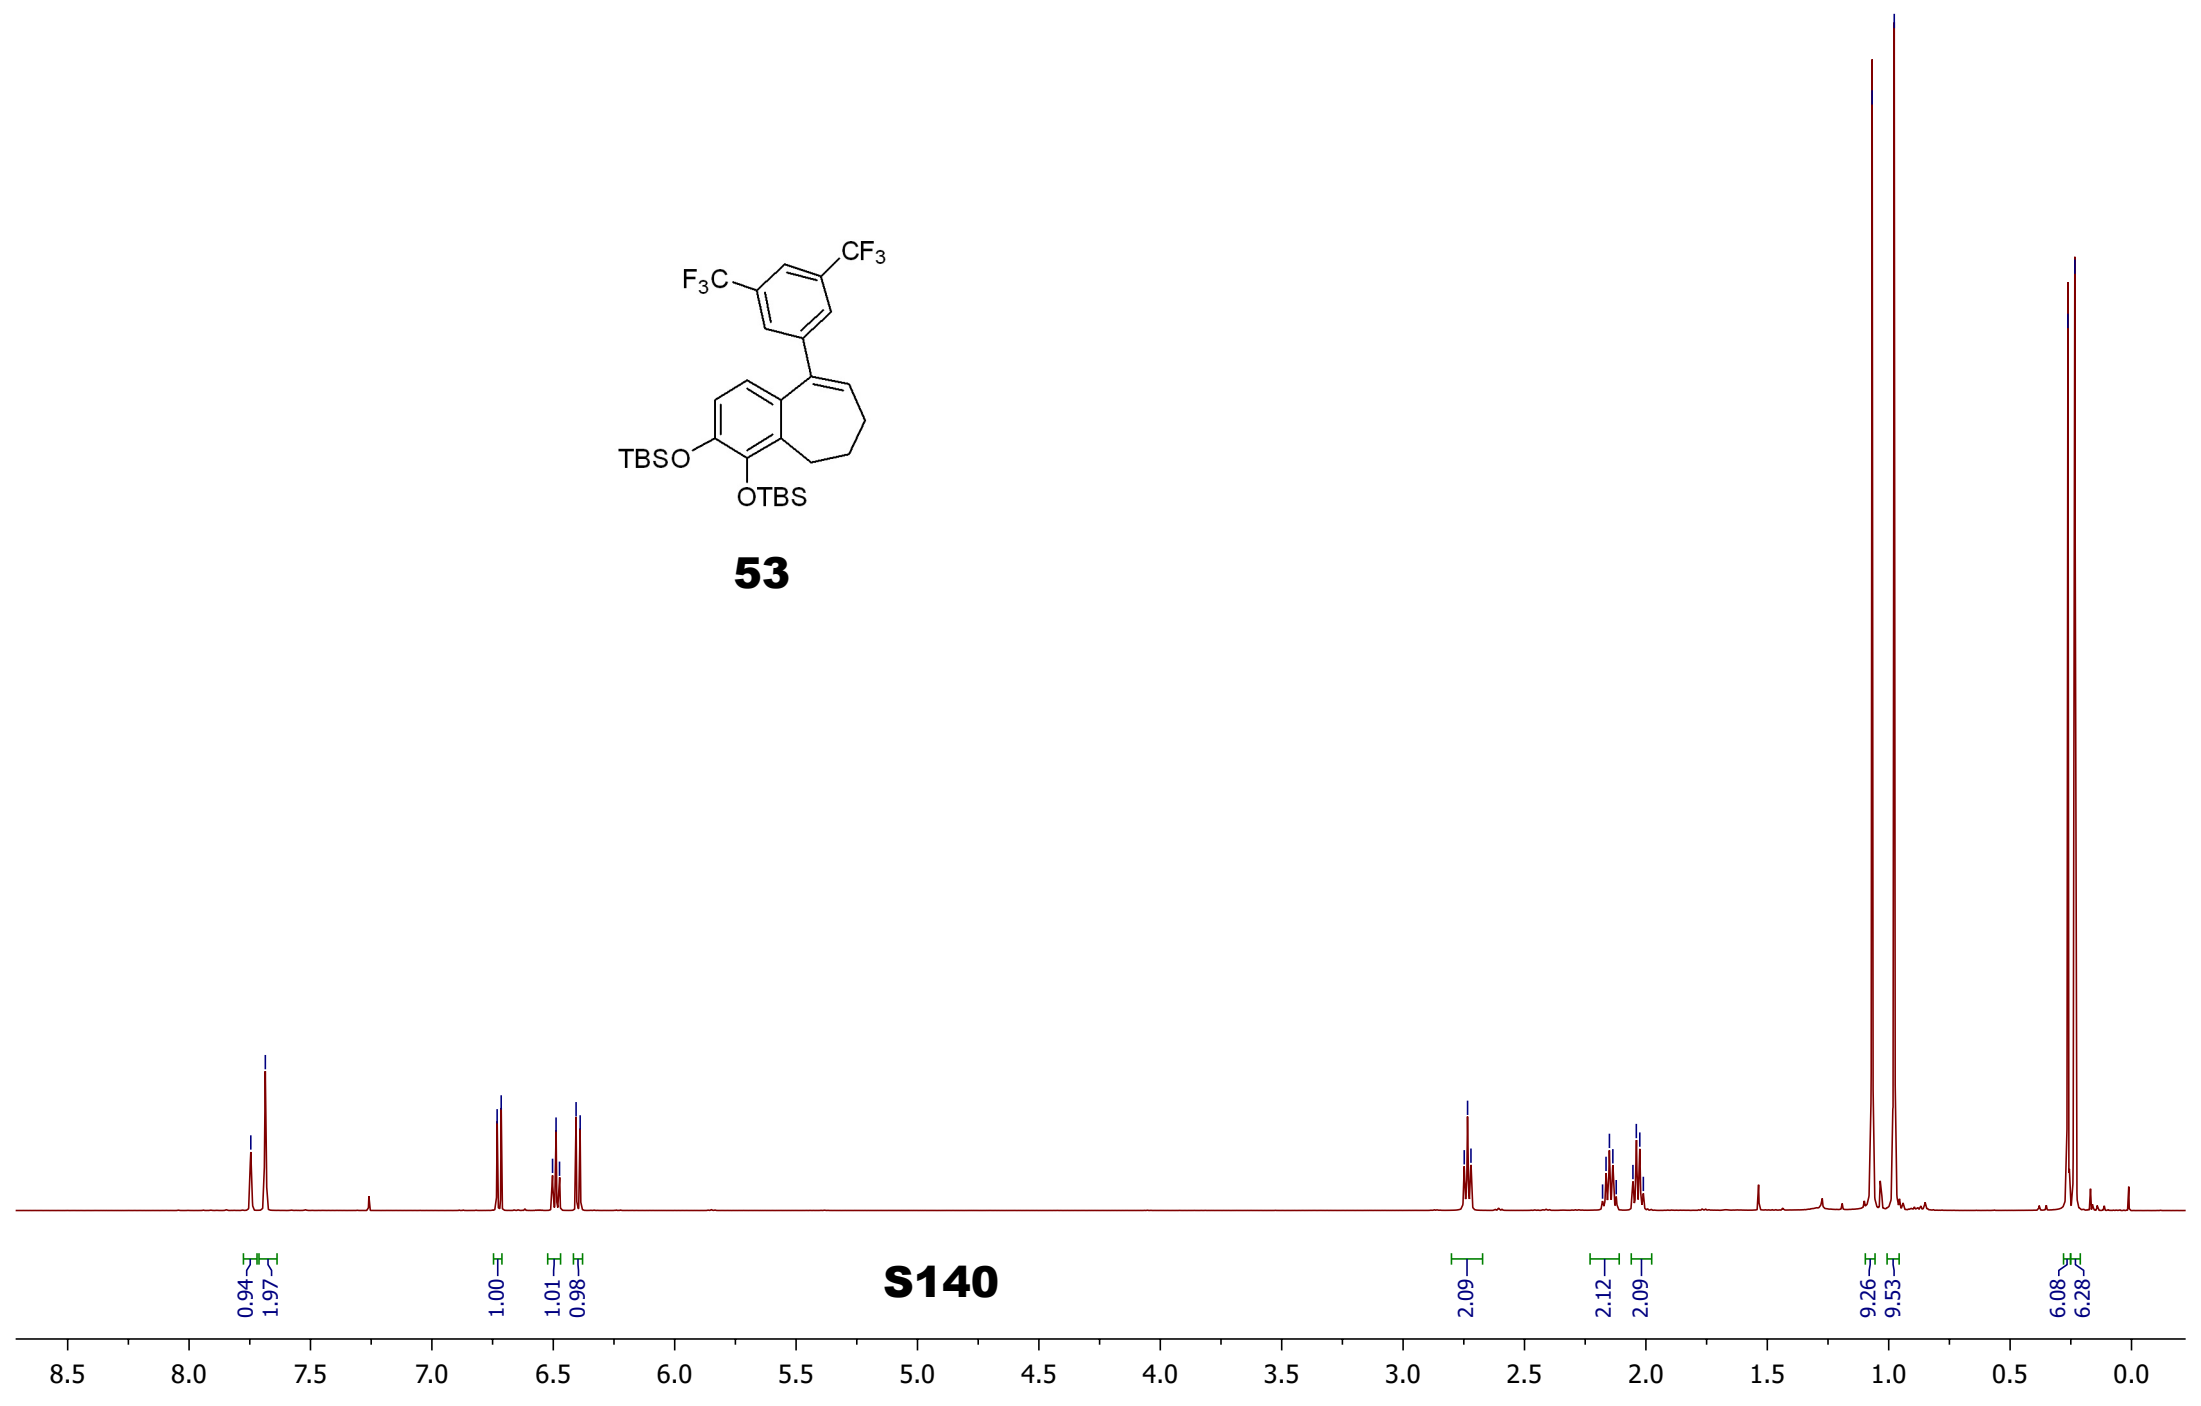

146.78  
145.01  
143.97  
141.13  
134.73  
132.96  
131.92  
131.65  
131.39  
131.13  
130.75  
127.94  
126.88  
124.71  
122.54  
122.25  
120.62  
120.59  
120.55  
120.52  
120.49  
120.37  
118.50

77.41 cdcl3  
77.16 cdcl3  
76.91 cdcl3

33.78  
26.43  
26.39  
26.07  
24.79  
19.08  
18.86

3.12  
3.21

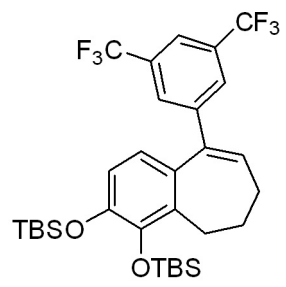

**53**

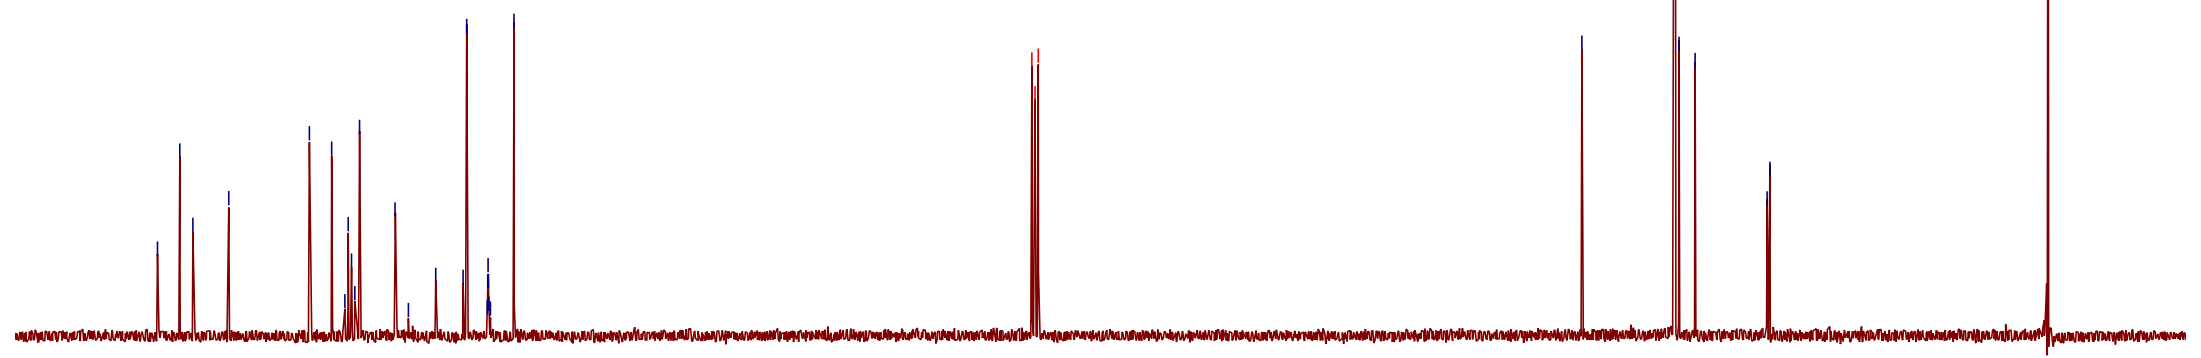

**S141**

150 140 130 120 110 100 90 80 70 60 50 40 30 20 10 0 -10

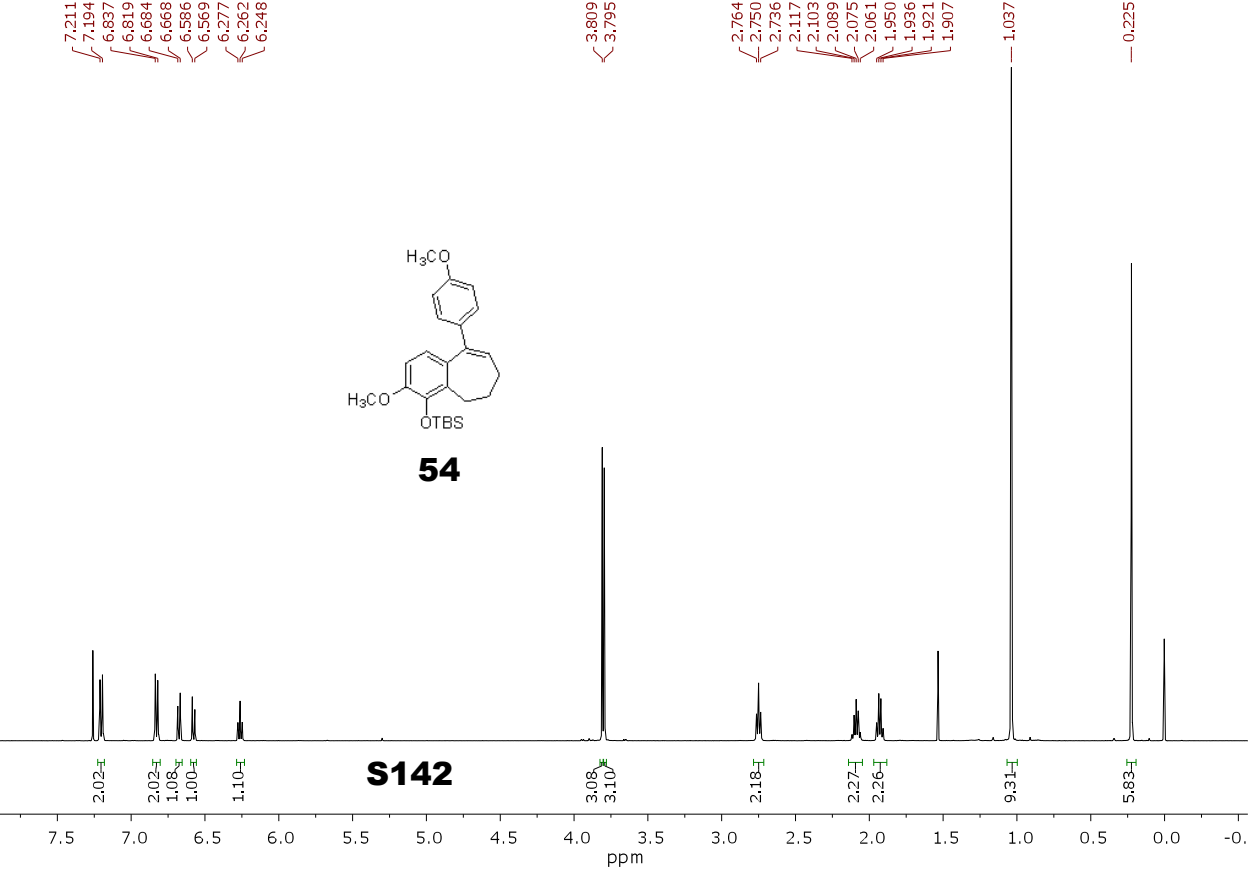

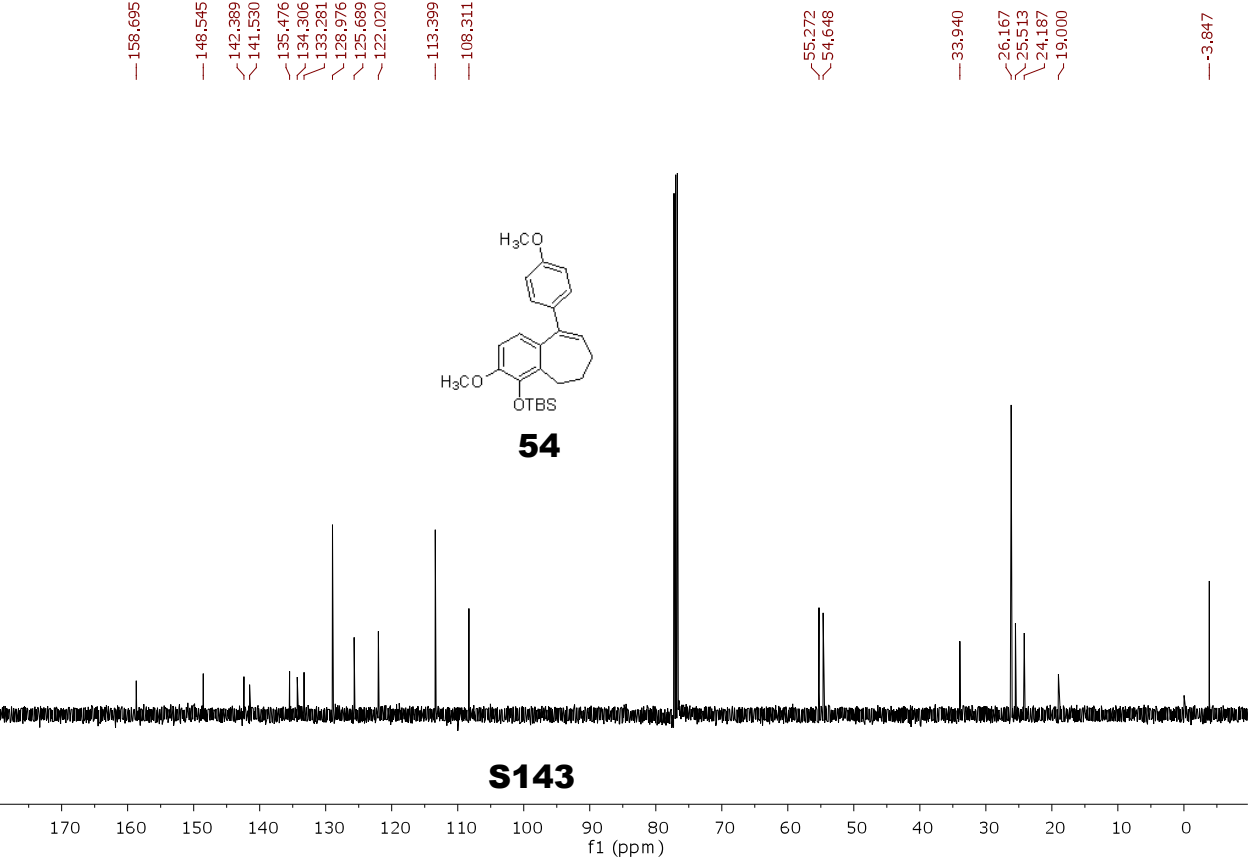

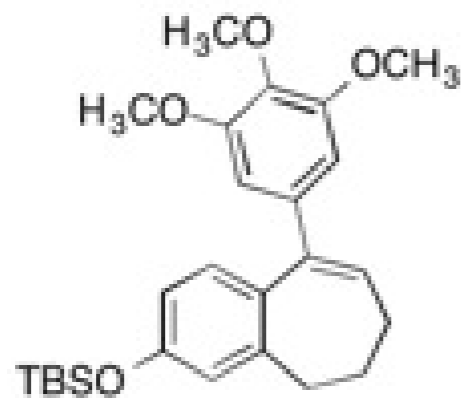

**55**

6.914  
6.898  
6.771  
6.766  
6.687  
6.682  
6.670  
6.665  
6.486  
6.354  
6.339  
6.325

3.859  
3.793

2.612  
2.598  
2.584  
2.181  
2.166  
2.152  
2.138  
2.124  
1.987  
1.973  
1.959  
1.944

1.002  
0.996

0.232  
0.226

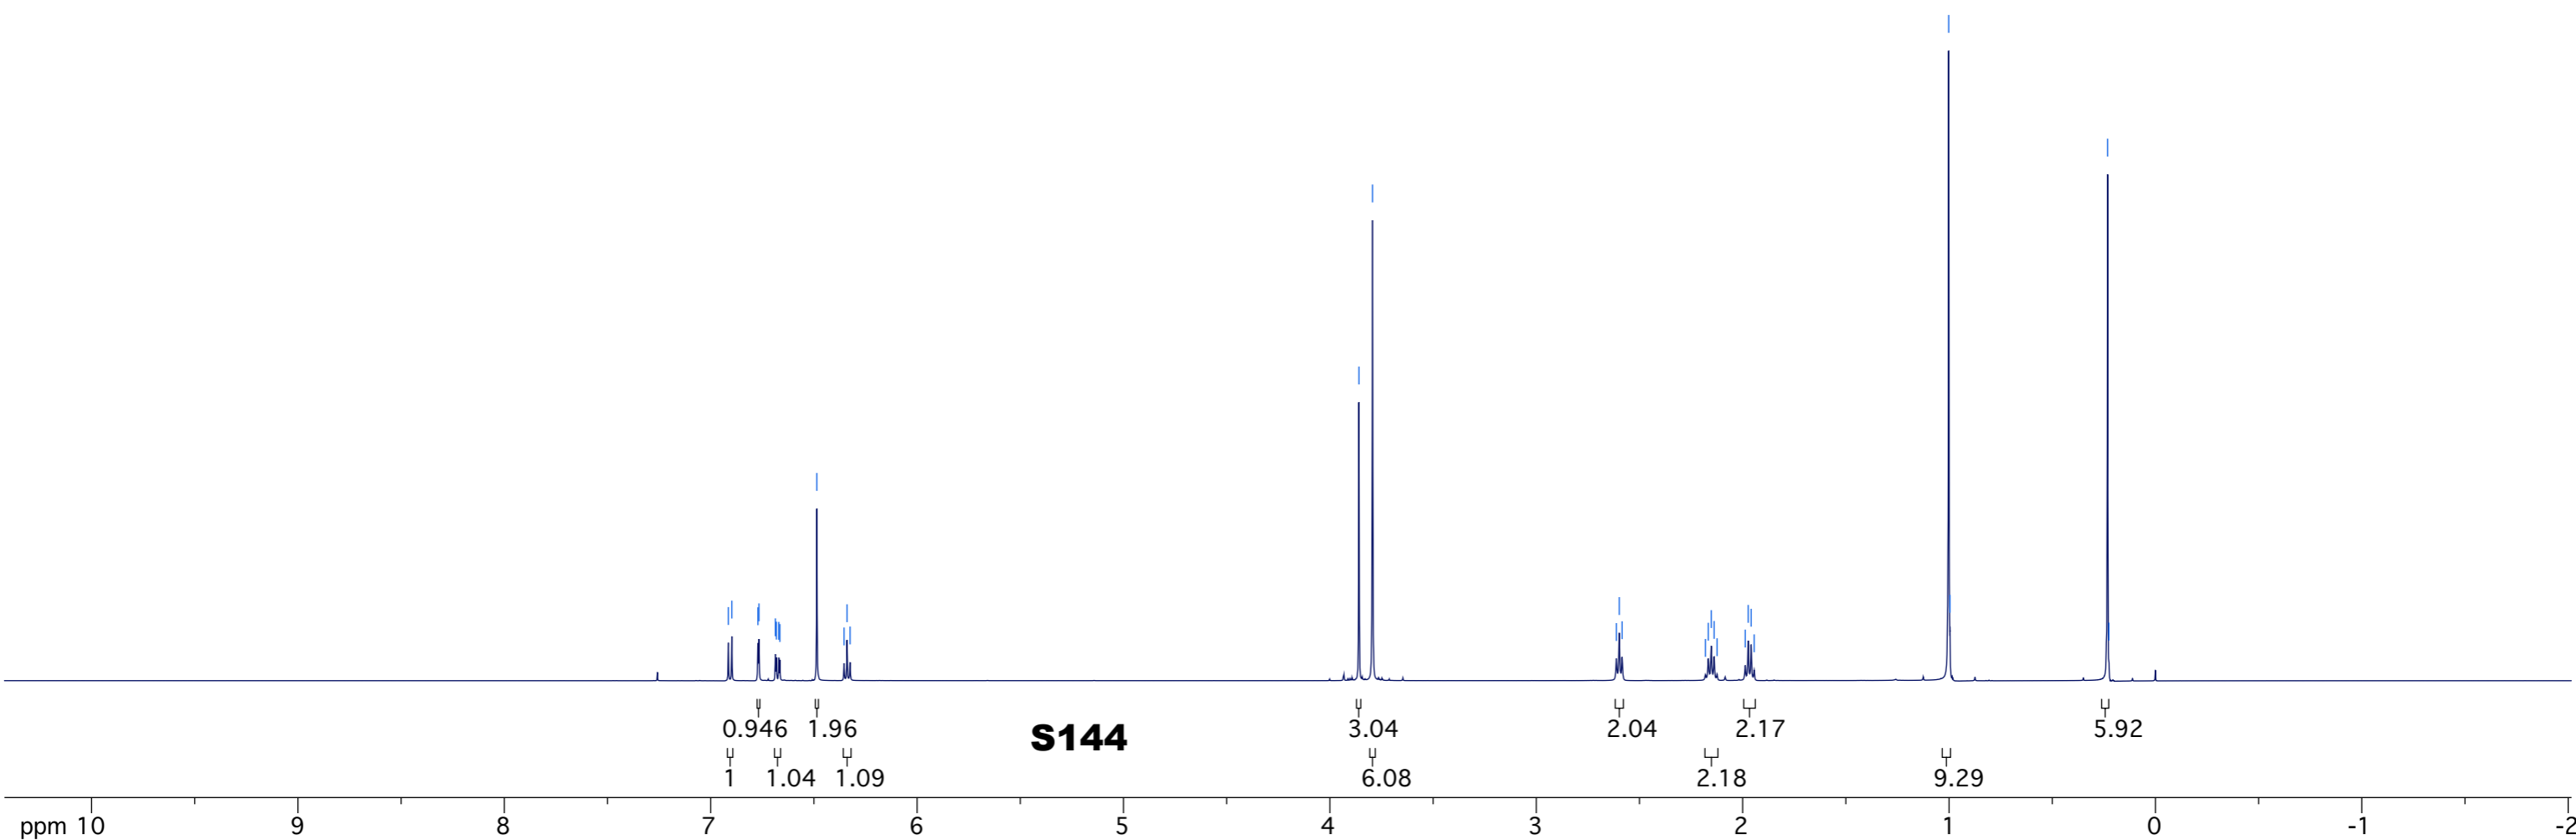

**S144**



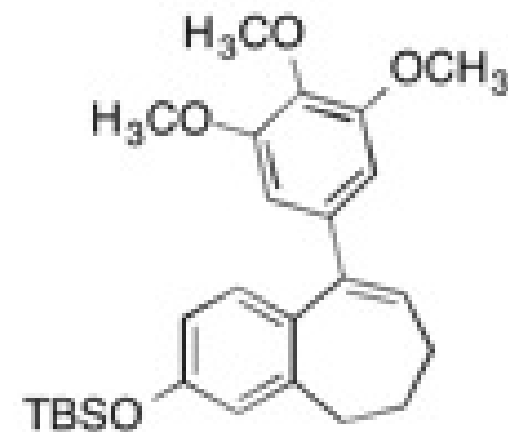

**55**

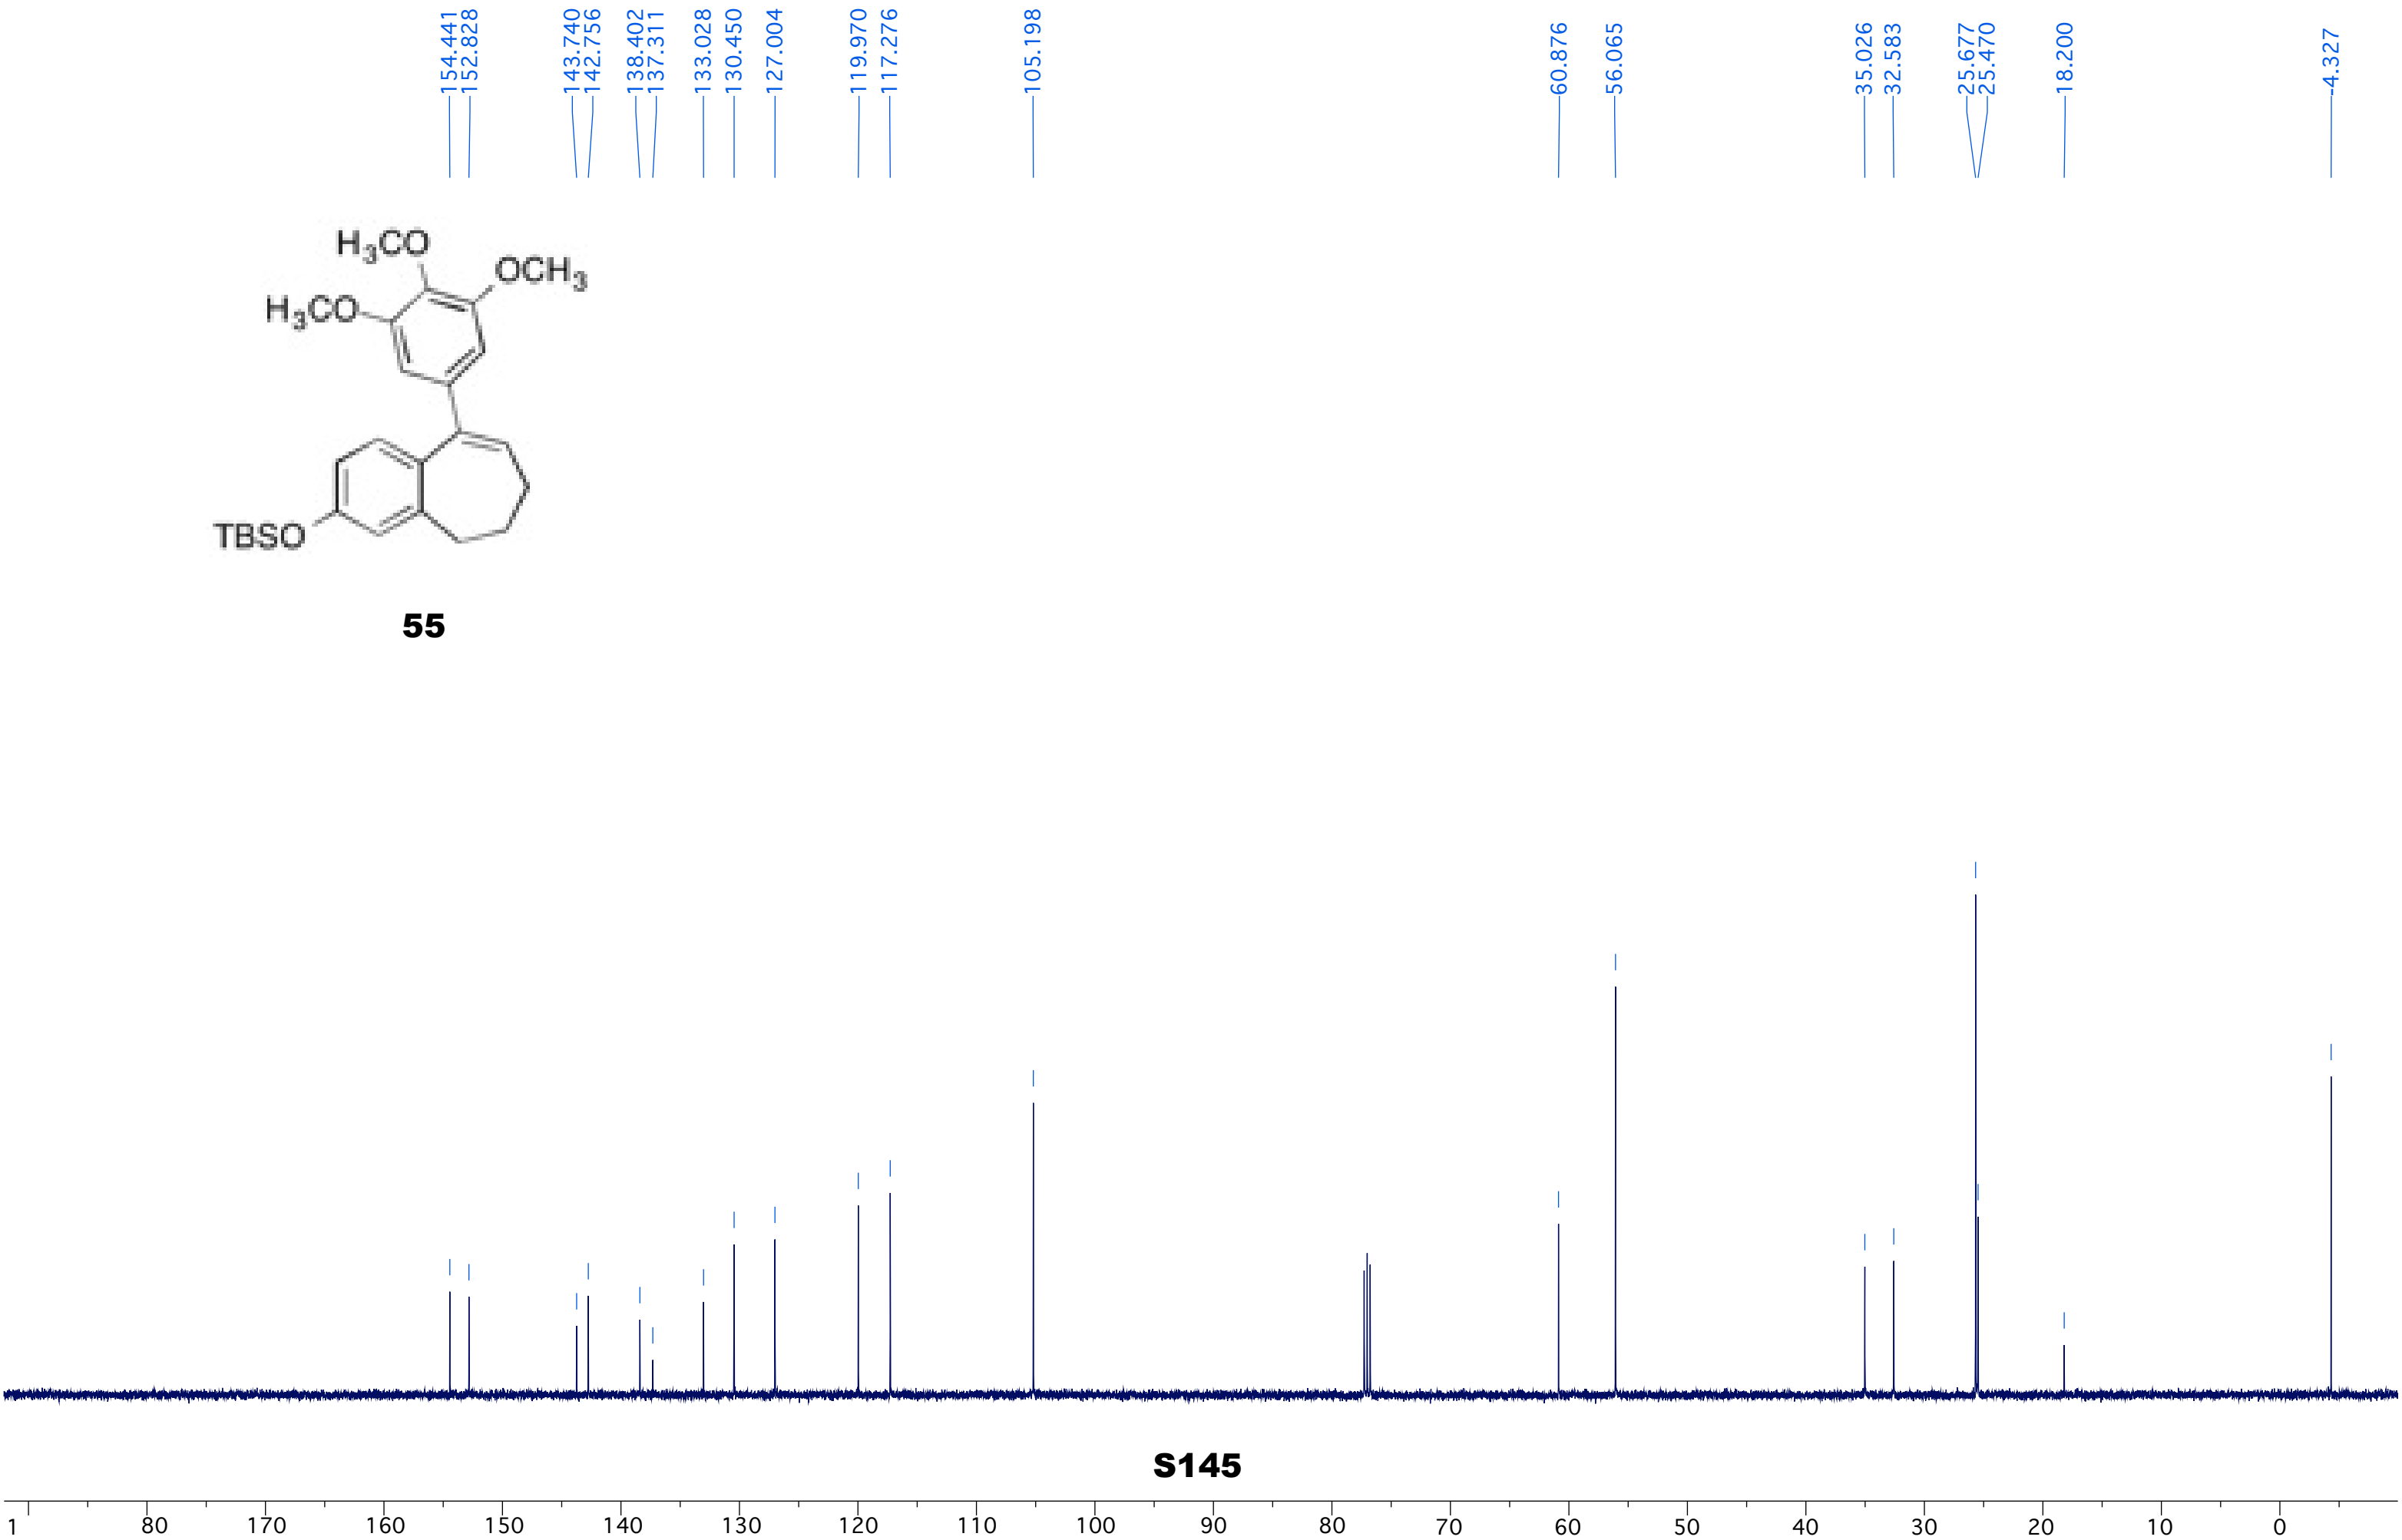

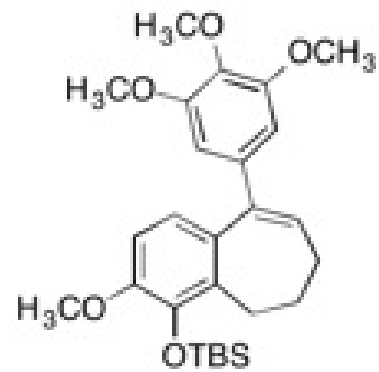

**56**

6.677  
6.660  
6.625  
6.608  
6.504  
6.332  
6.318  
6.303

3.846  
3.779  
3.767

2.798  
2.784  
2.770

2.142  
2.128  
2.114  
2.101  
2.087  
1.971  
1.957  
1.943  
1.928

1.055

0.249  
0.243

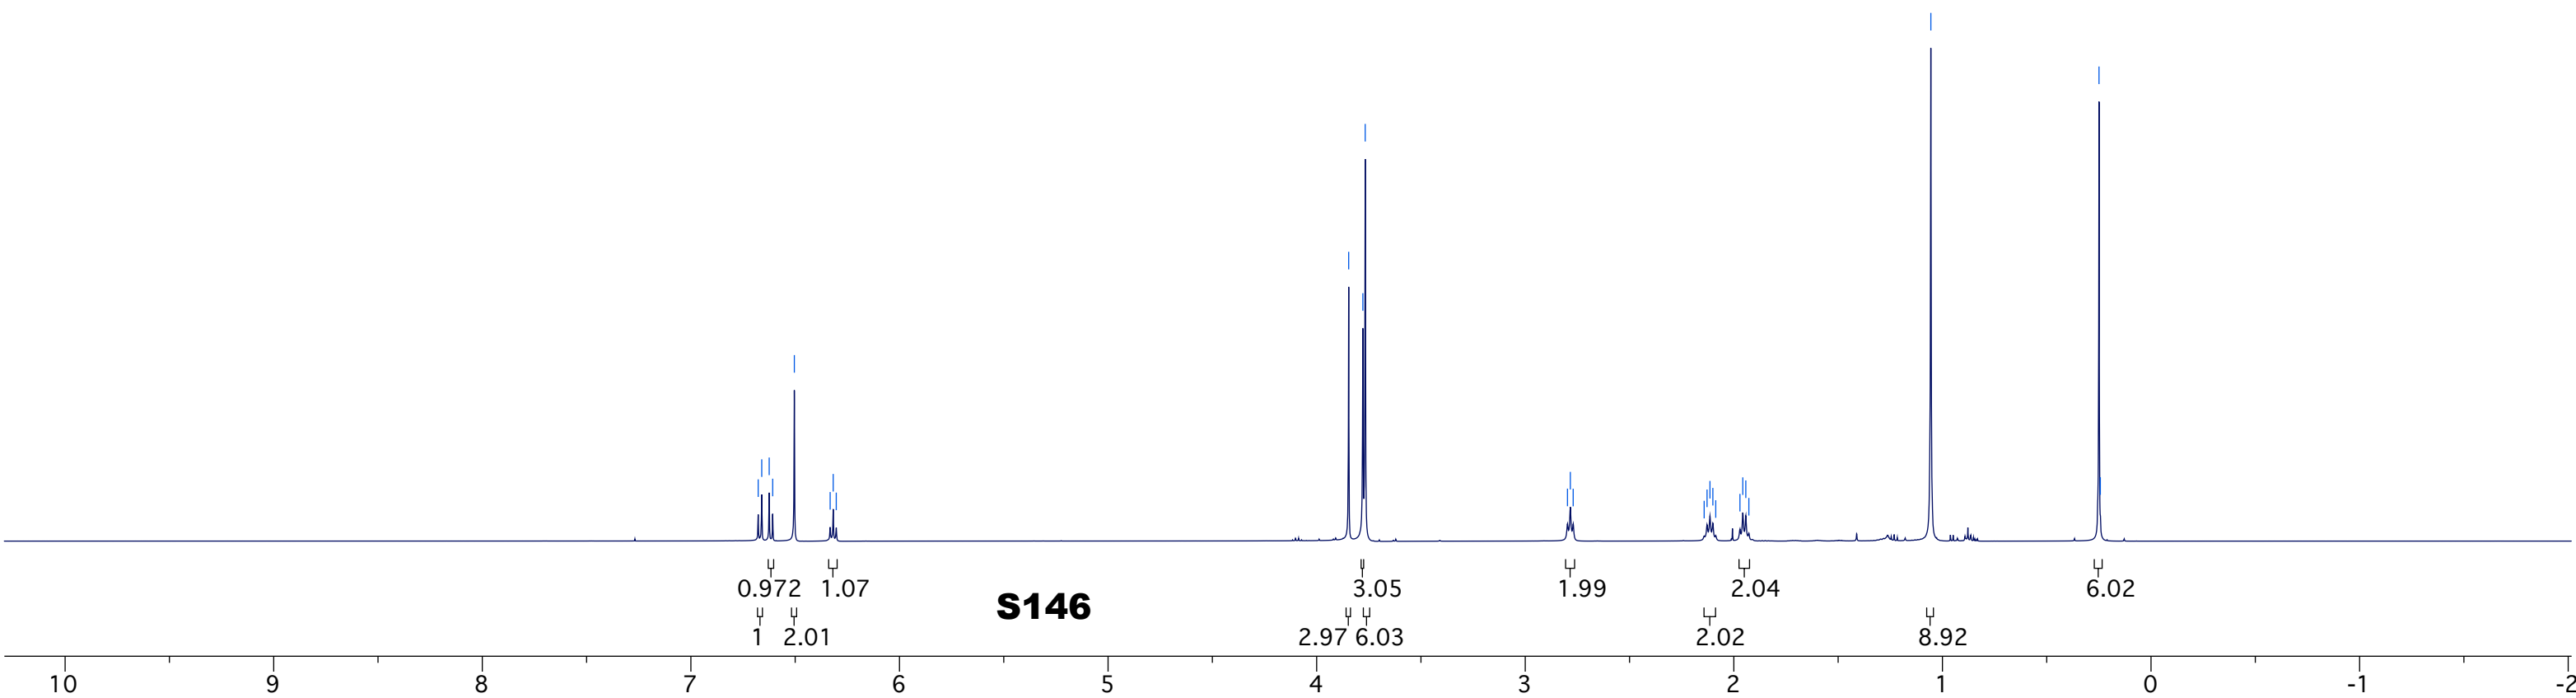

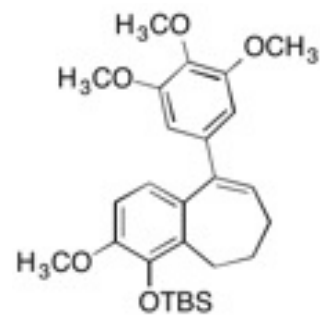

**56**

152.818  
148.622  
143.096  
141.473  
138.591  
137.325  
133.797  
133.151  
126.700  
122.384  
108.385  
105.279  
60.746  
55.989  
54.542  
33.952  
26.194  
25.606  
24.241  
19.000  
-3.796

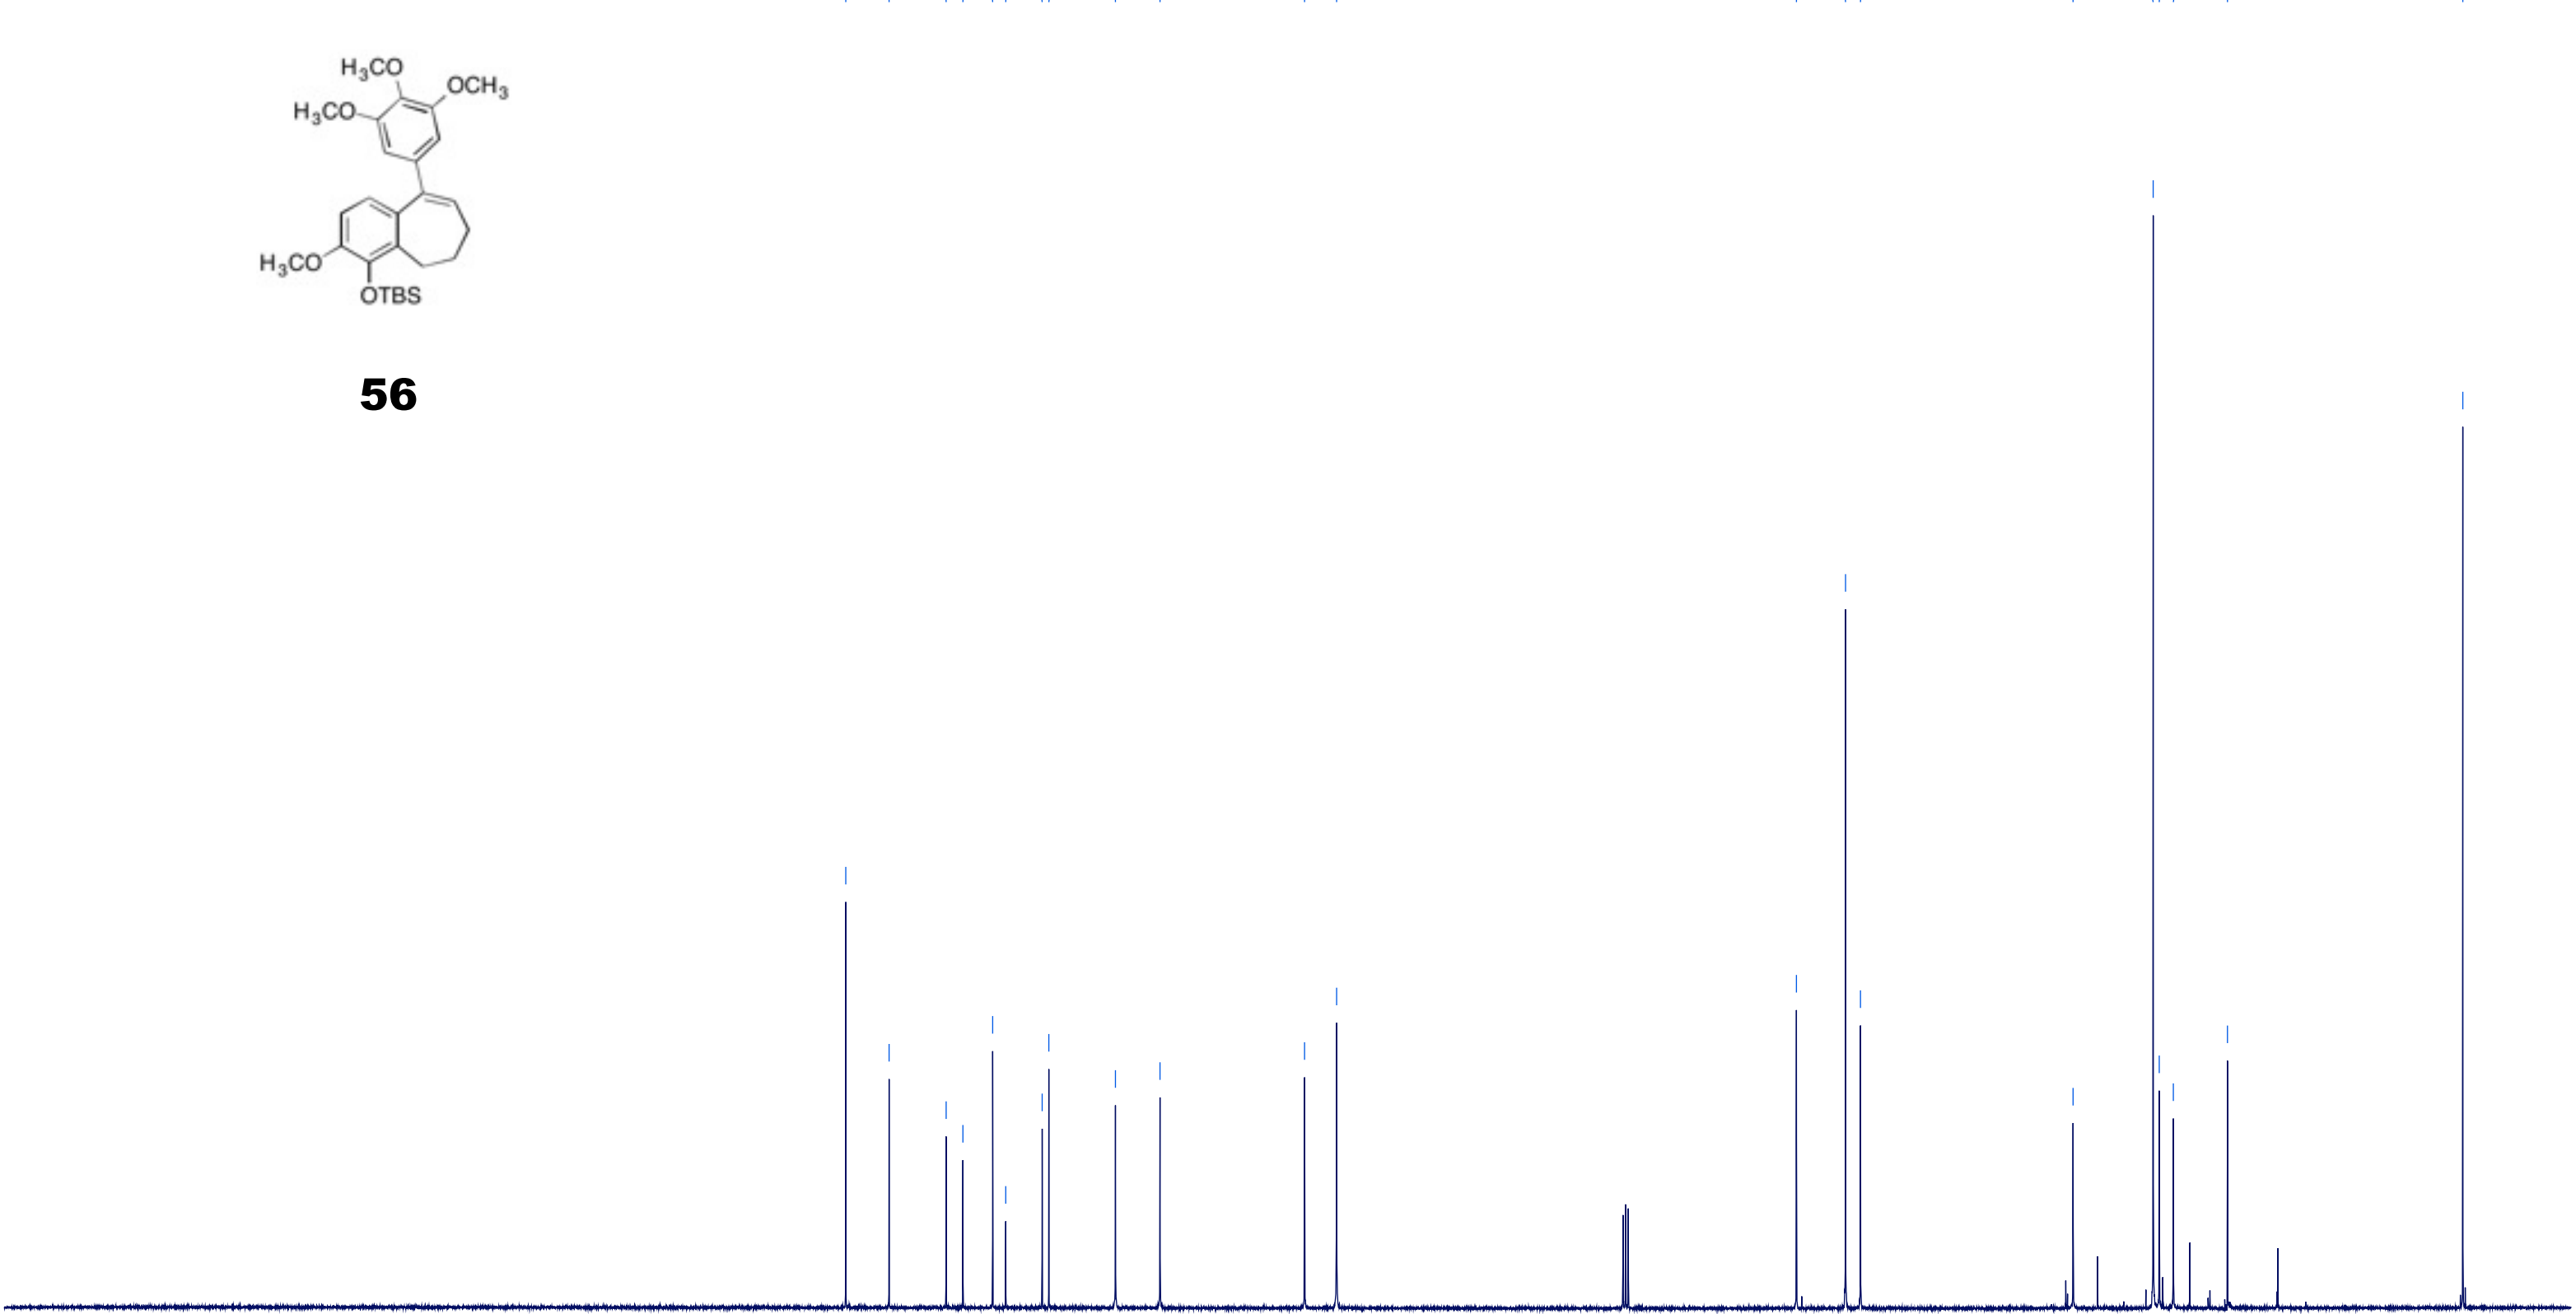

**S147**

230 220 210 200 190 180 170 160 150 140 130 120 110 100 90 80 70 60 50 40 30 20 10 0 -10

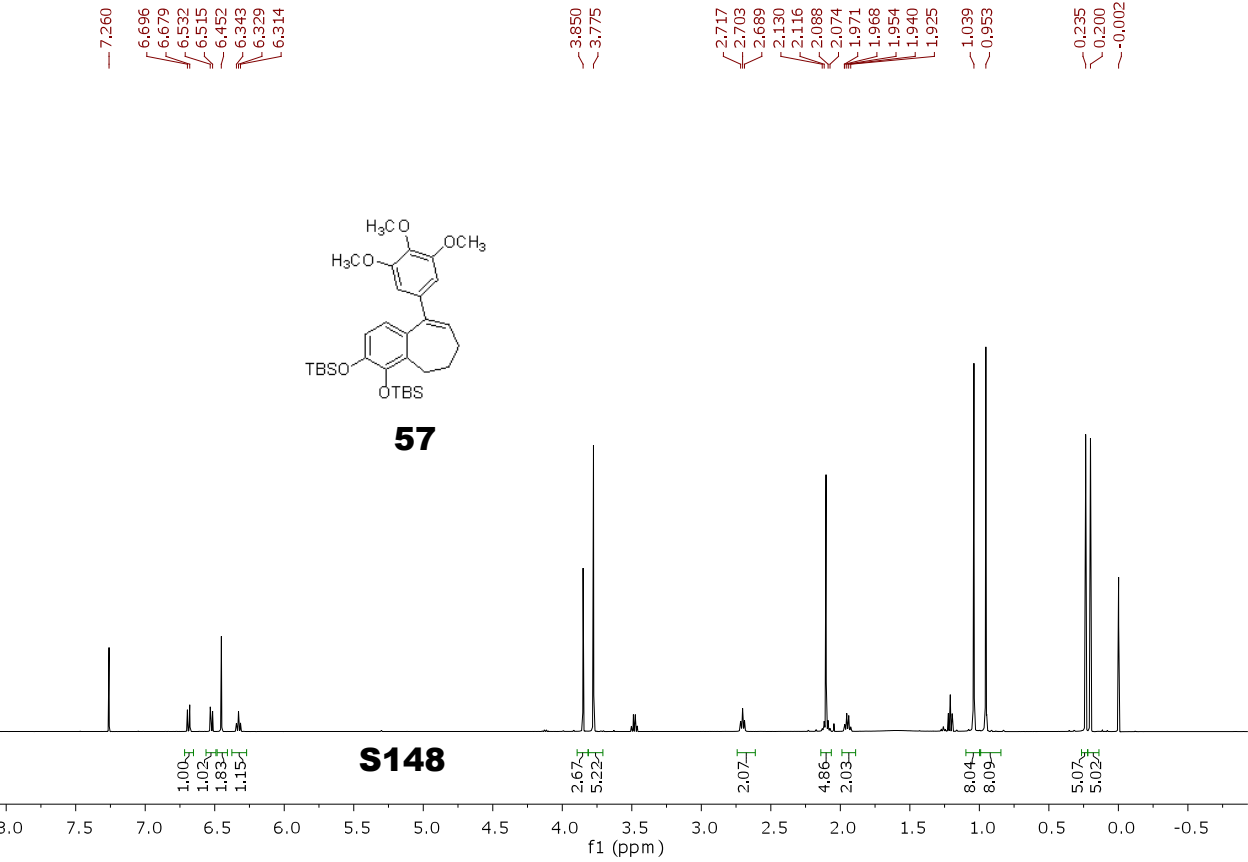

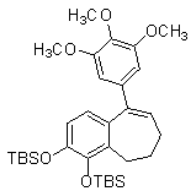

**57**

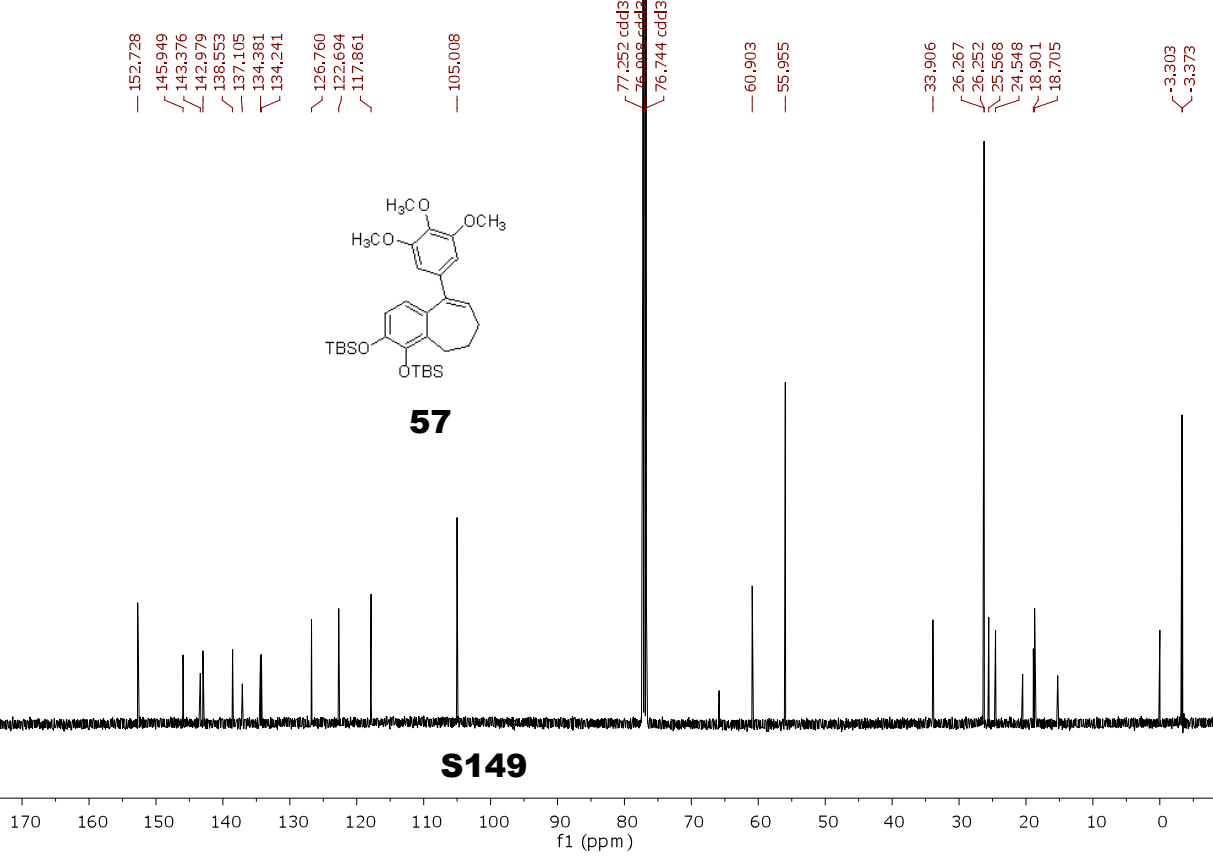

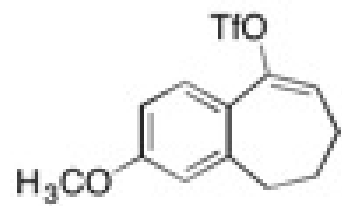

**59**

7.527  
7.509  
6.874  
6.869  
6.857  
6.852  
6.819  
6.813  
6.159  
6.147  
6.135  
3.792  
2.785  
2.772  
2.760  
2.224  
2.210  
2.197  
2.184  
2.064  
2.050  
2.038  
2.025  
2.011

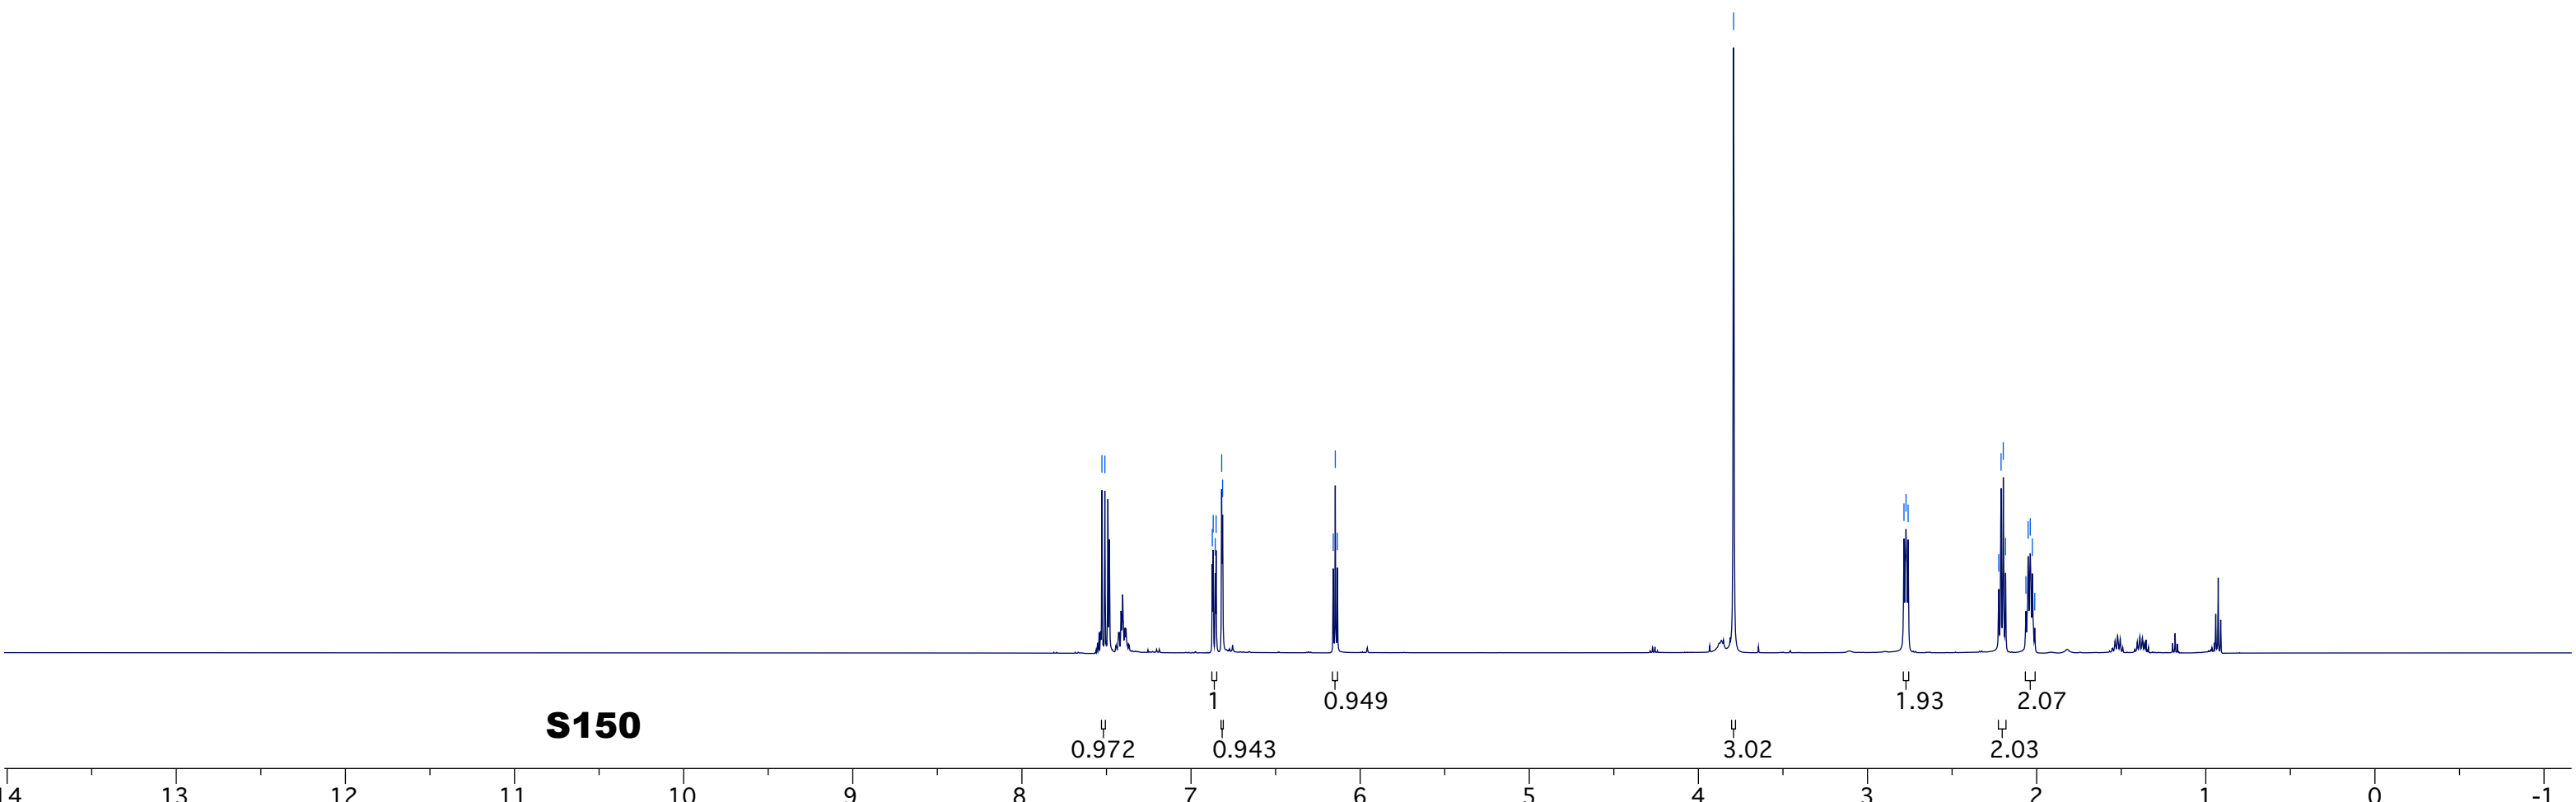

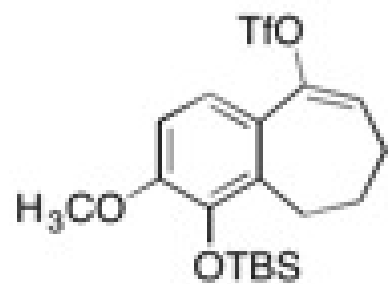

**60**

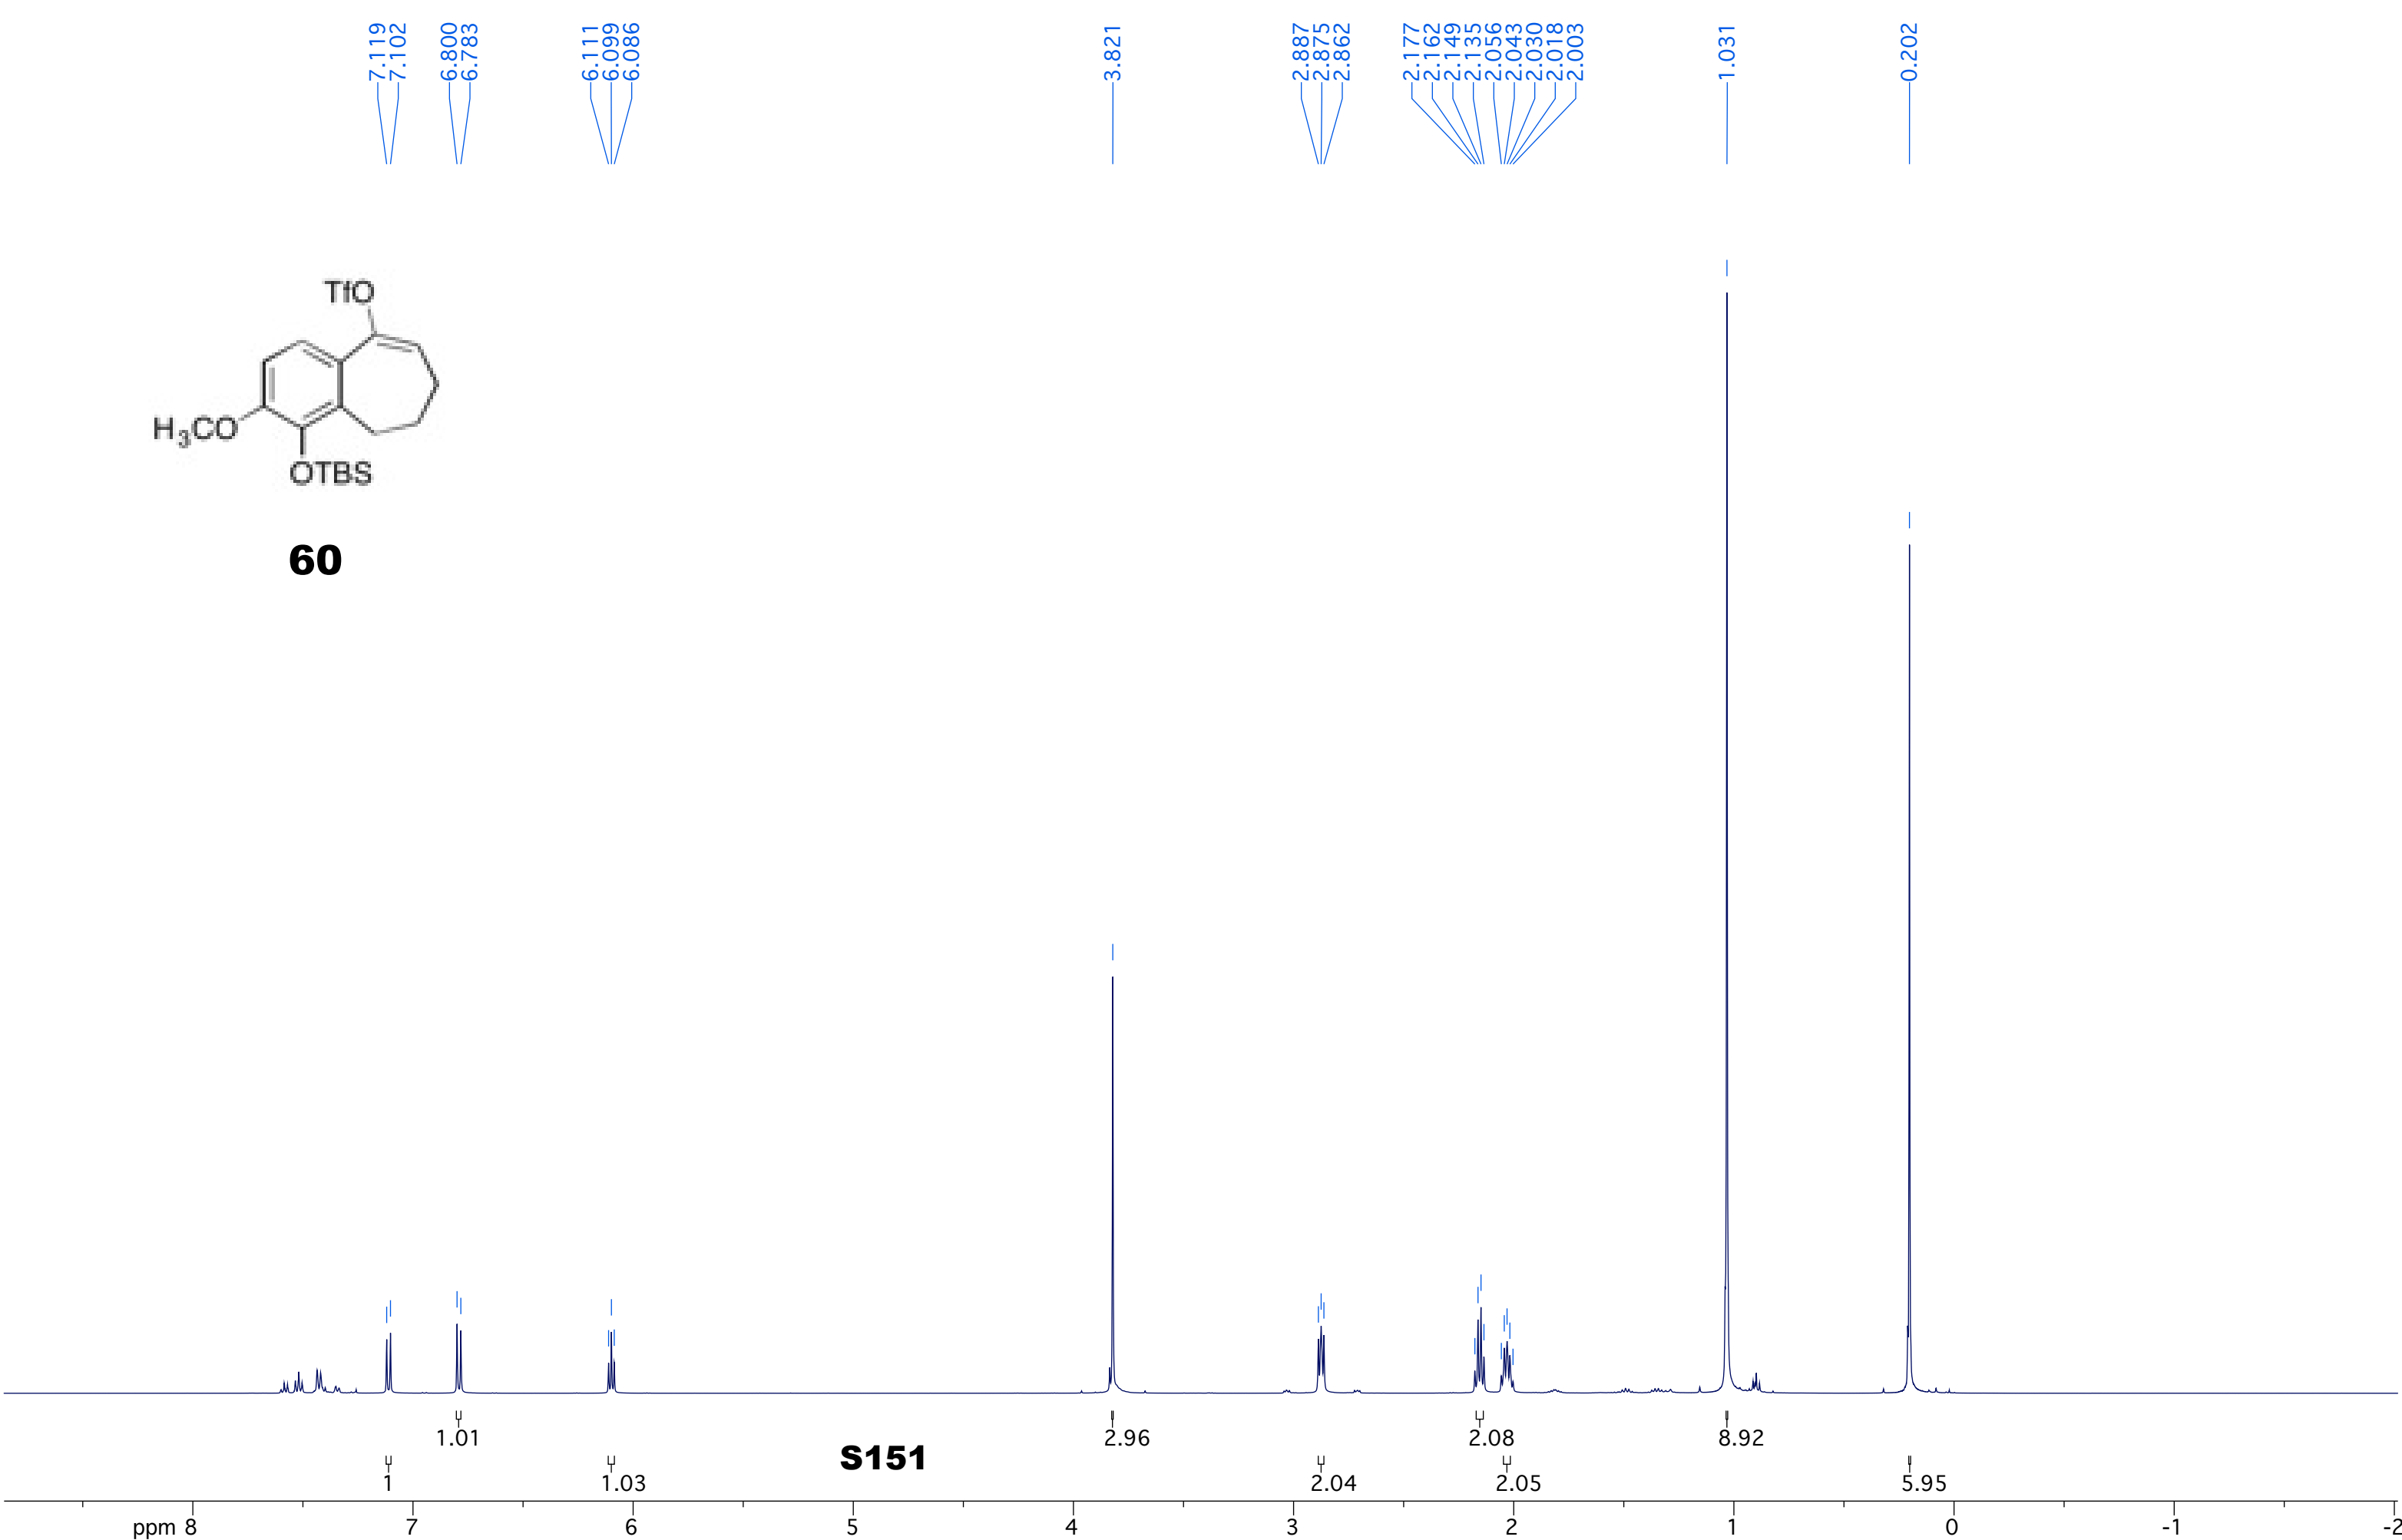

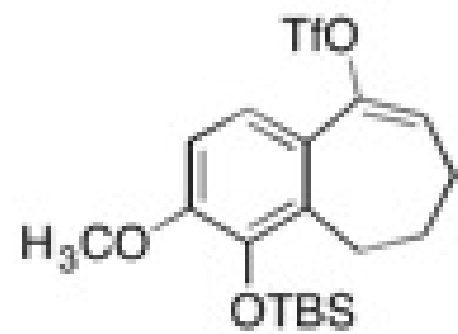

**60**

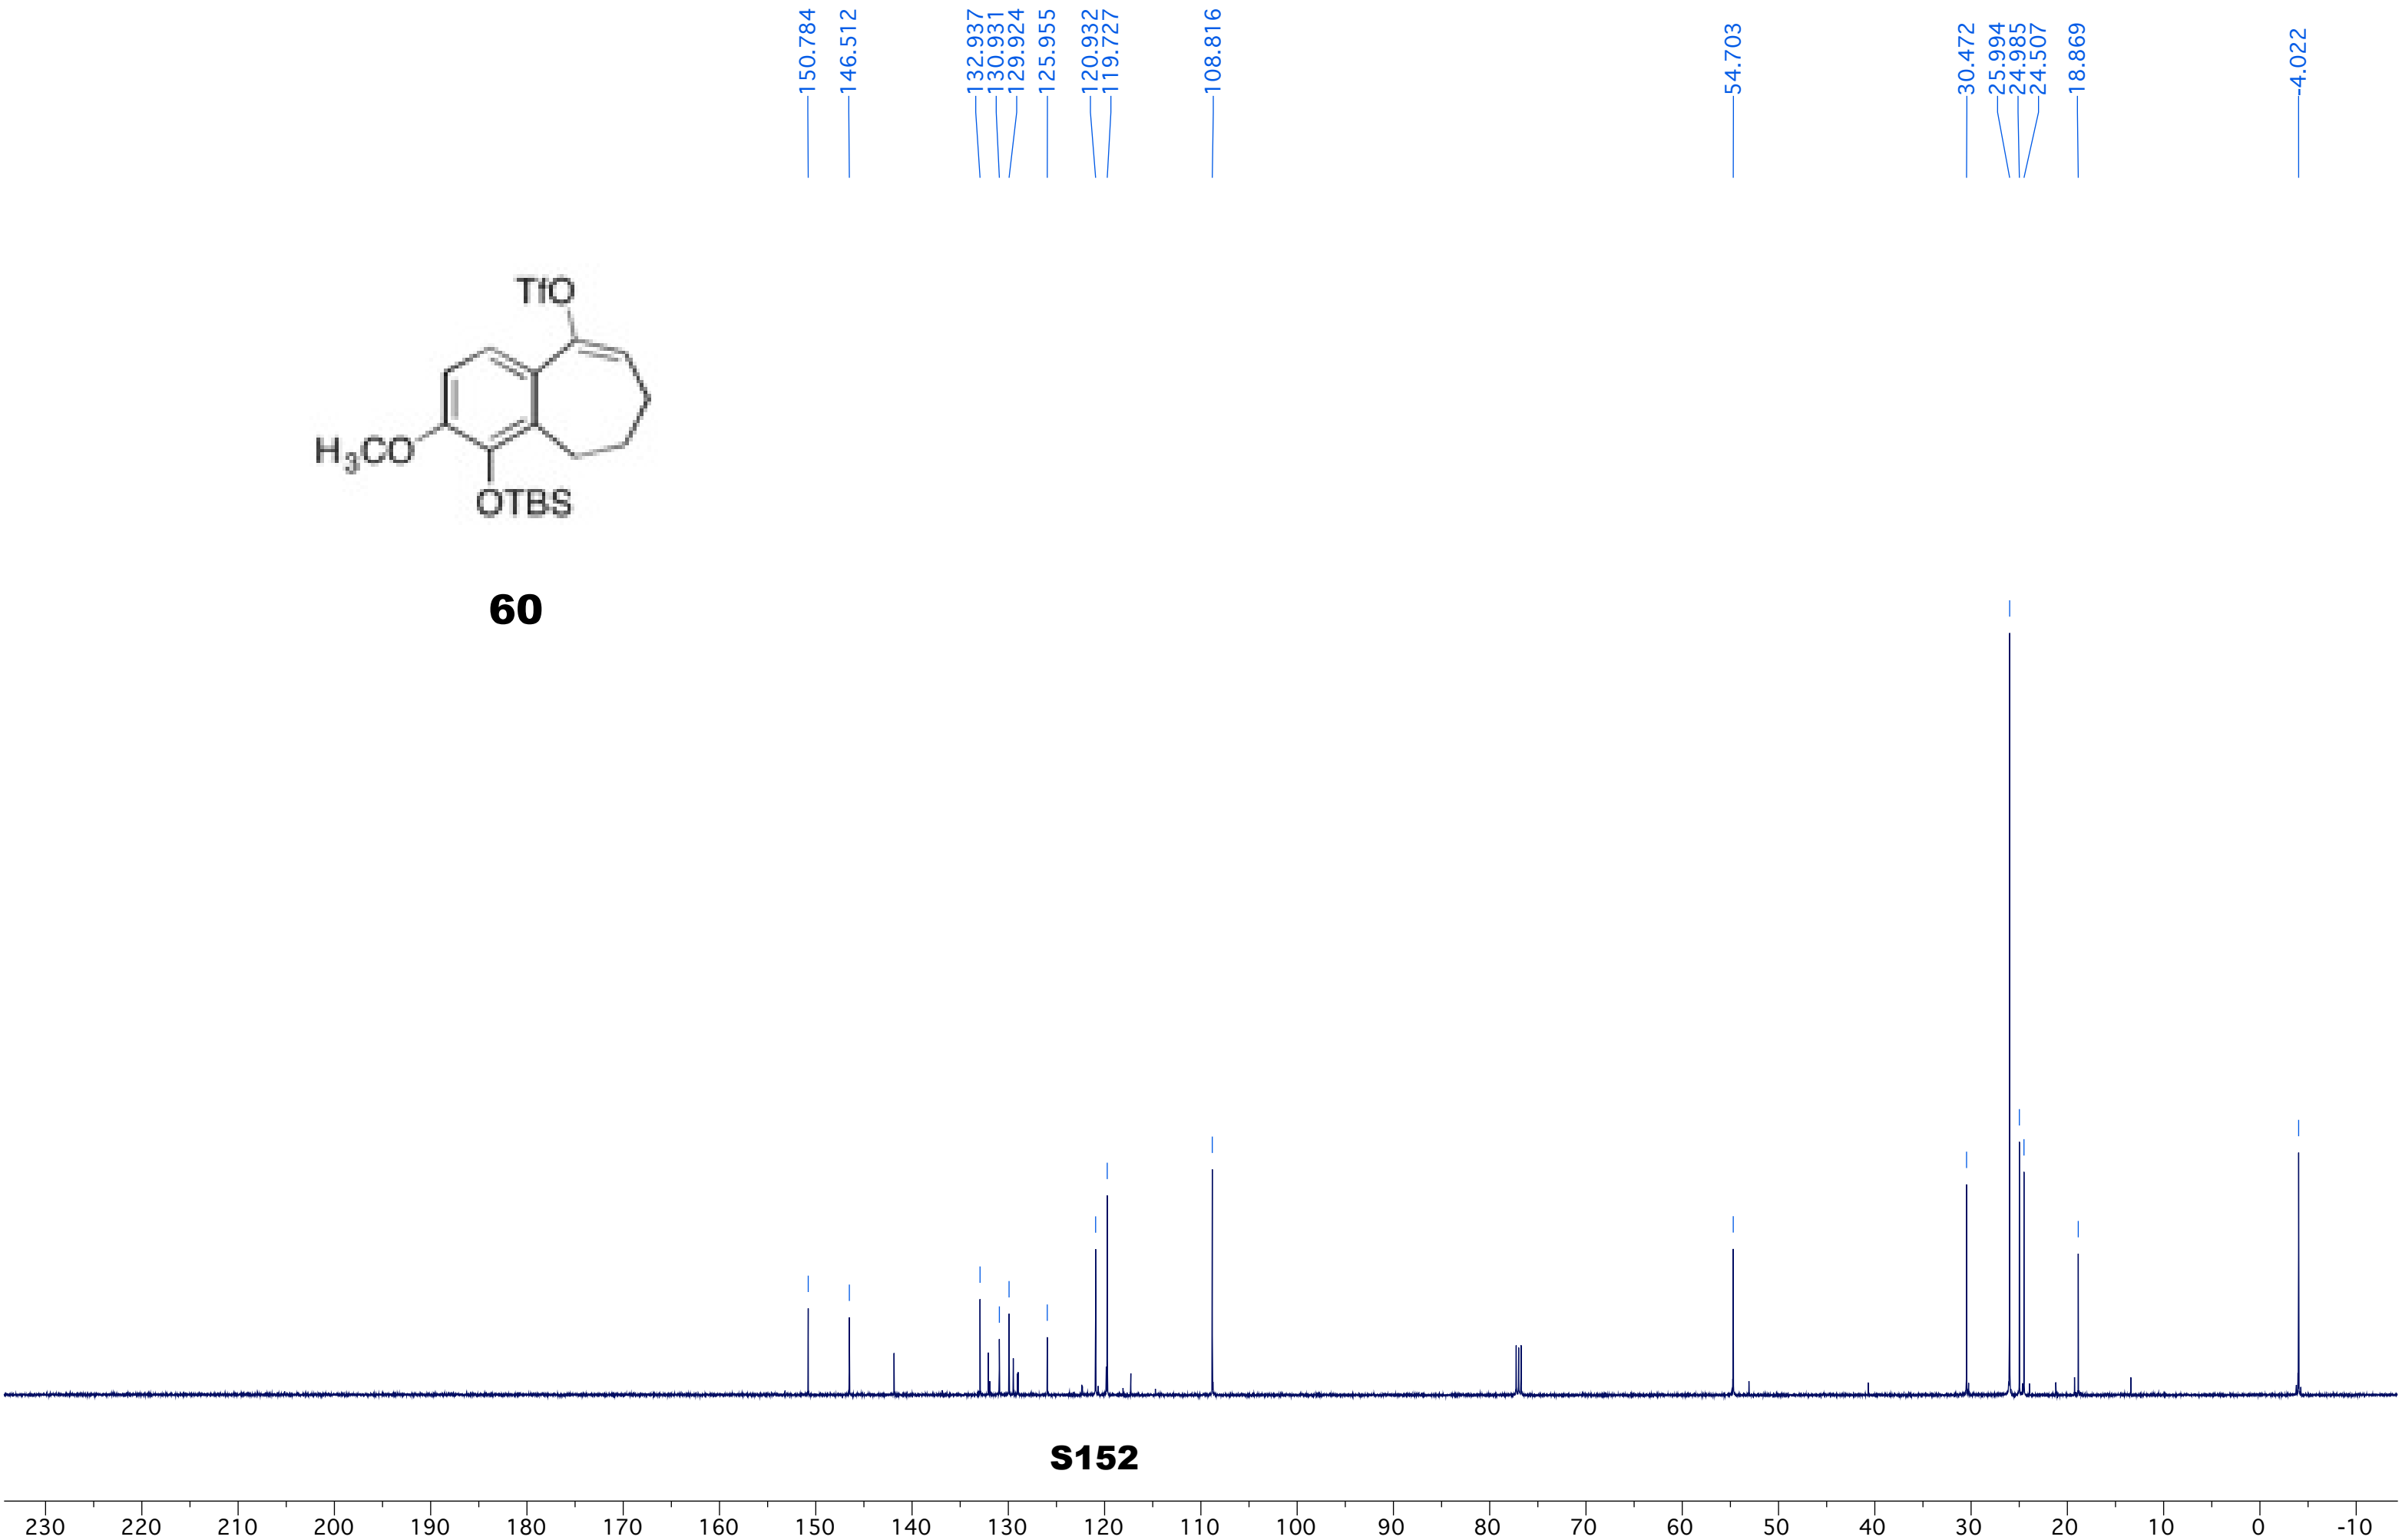



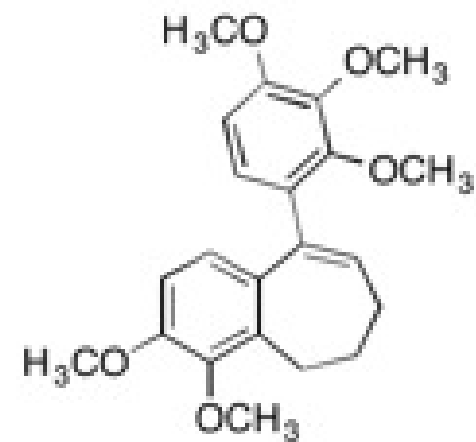

**61**

6.921  
6.904  
6.660  
6.643  
6.625  
6.590  
6.573  
6.119  
6.105  
6.090

3.856  
3.836  
3.820  
3.813

3.375

2.869  
2.855  
2.841

2.175  
2.163  
2.149  
2.134  
2.121  
1.977  
1.963  
1.949  
1.935

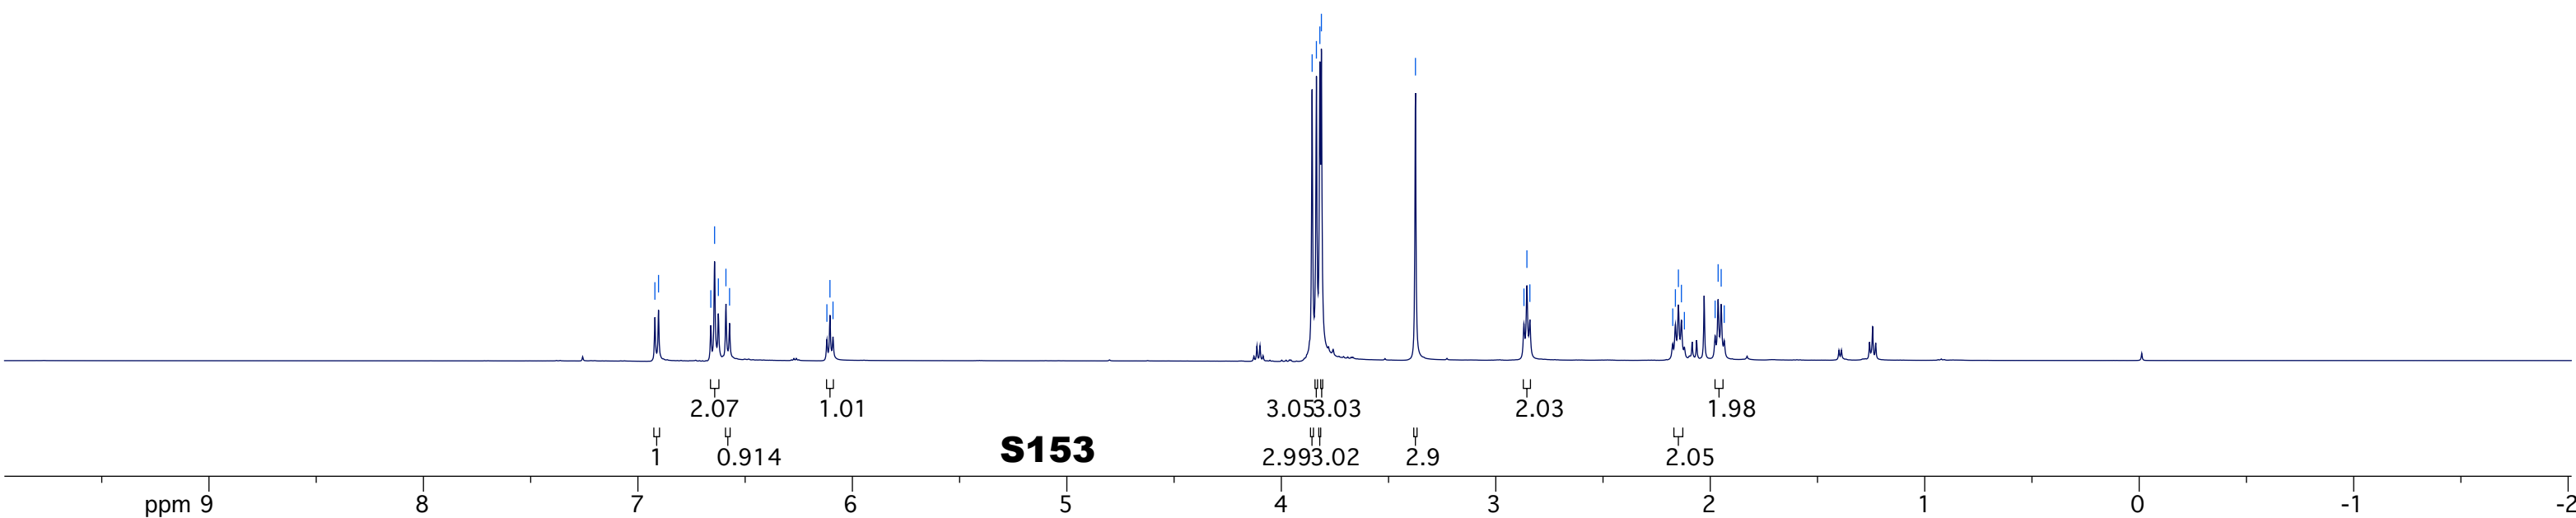

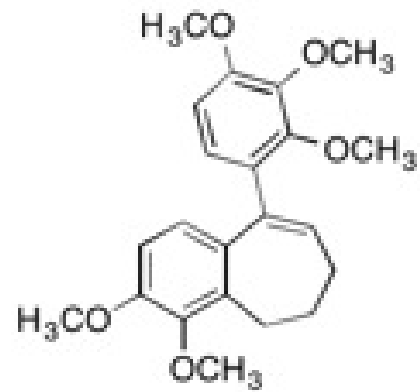

**61**

153.089  
151.660  
151.003  
146.194  
142.389  
140.092  
135.857  
134.864  
130.835  
128.354  
124.926  
123.467  
108.885  
106.679  
61.246  
60.648  
60.329  
55.929  
55.550  
34.392  
25.419  
23.932

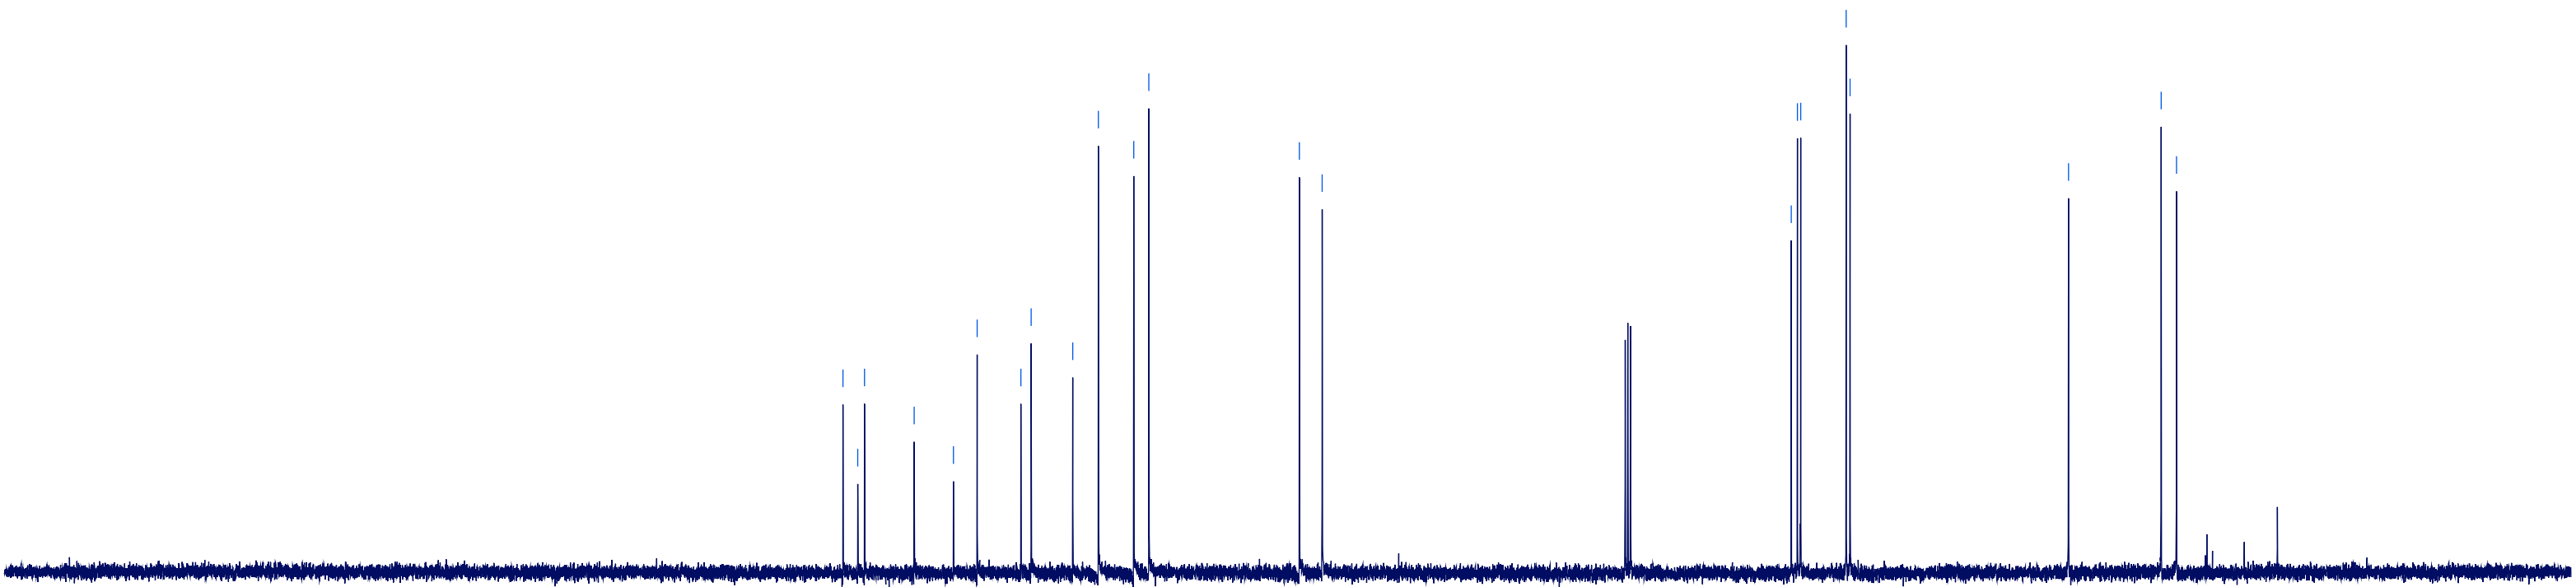

**S154**

230 220 210 200 190 180 170 160 150 140 130 120 110 100 90 80 70 60 50 40 30 20 10 0 -10

**HPLC for compound 61**

=====  
Acq. Operator : Christine  
Acq. Instrument : Instrument 1 Location : -  
Injection Date : 7/18/2013 10:11:00 AM  
Acq. Method : C:\CHEM32\1\METHODS\MASTERMETHOD.M  
Last changed : 7/18/2013 10:07:07 AM by Christine  
Analysis Method : C:\CHEM32\1\DATA\CHRISTINE\CAH\_3\_51\_CLEAN2.D\DA.M (MASTERMETHOD.M)  
Last changed : 7/18/2013 11:01:15 AM by Christine  
Sample Info :

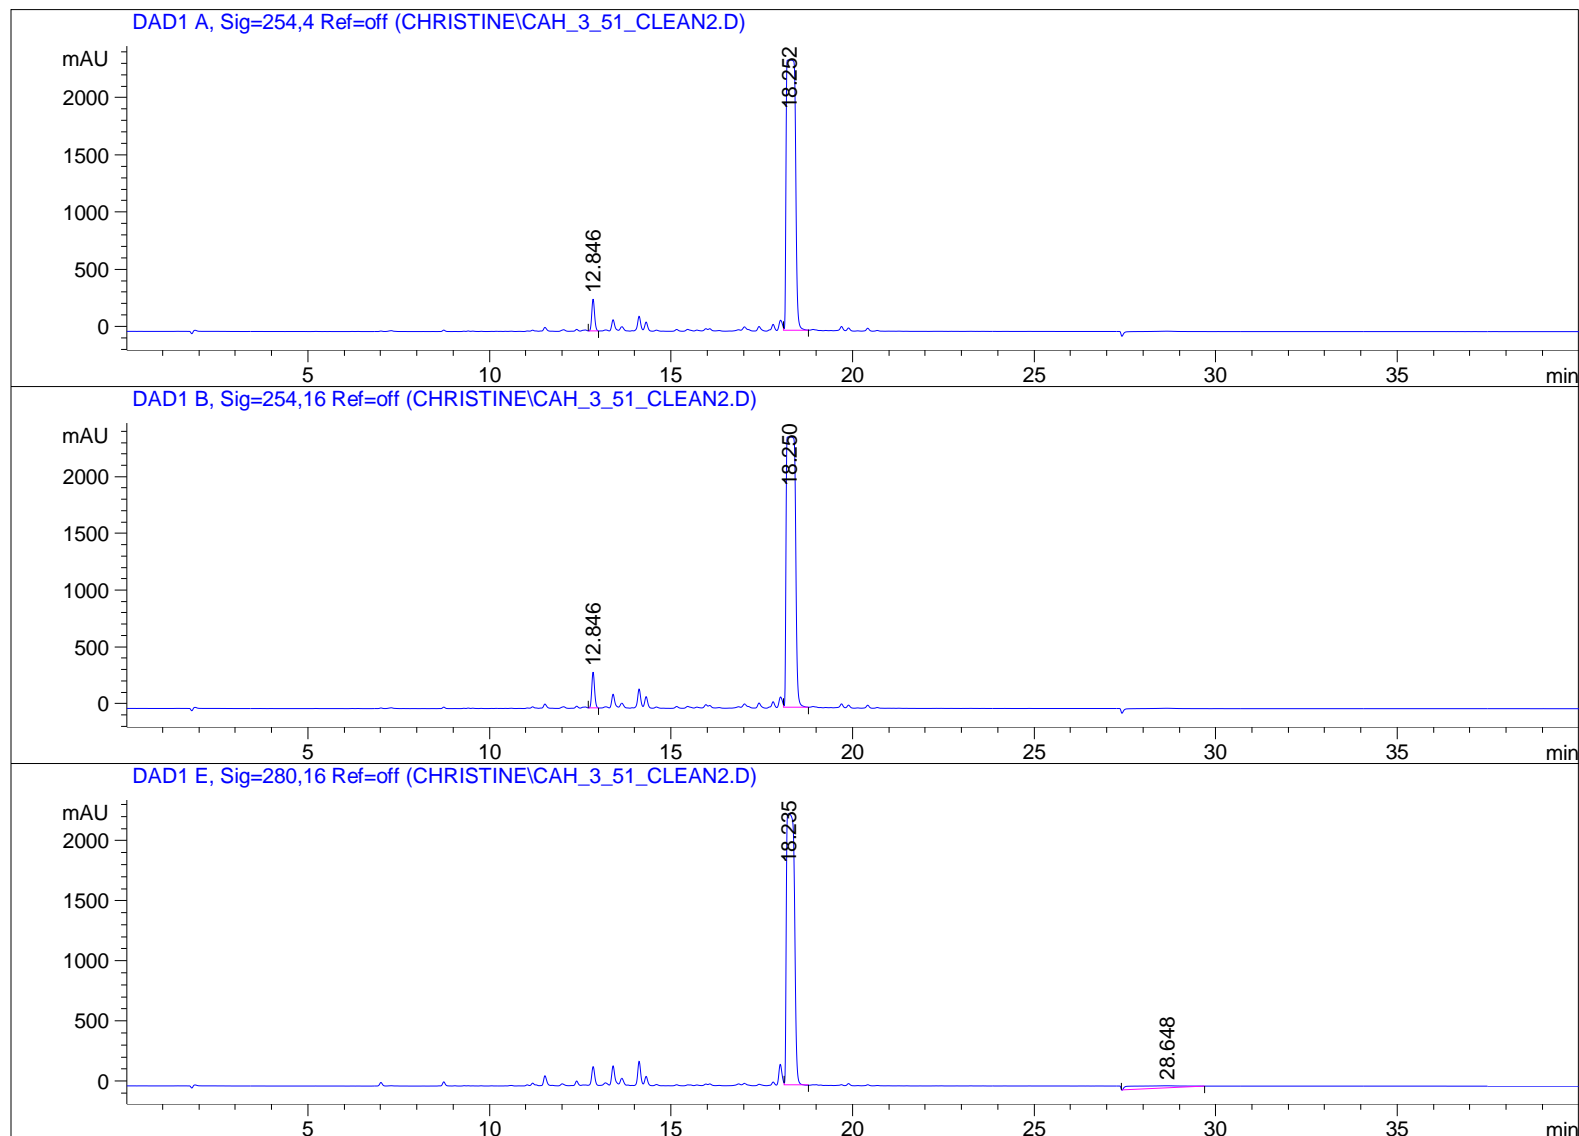**S155**

Sample Name: CAH\_3\_51\_Clean

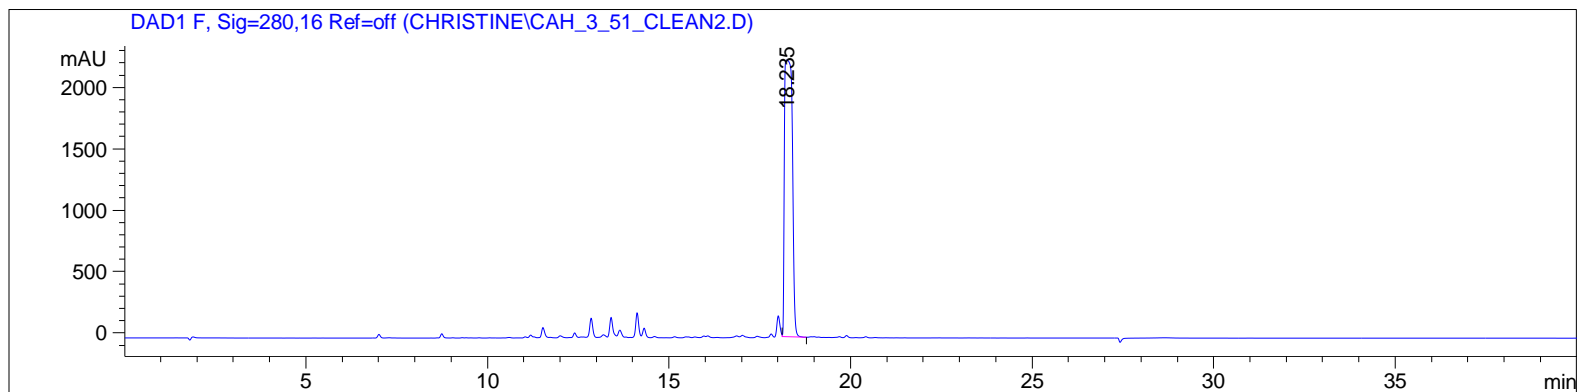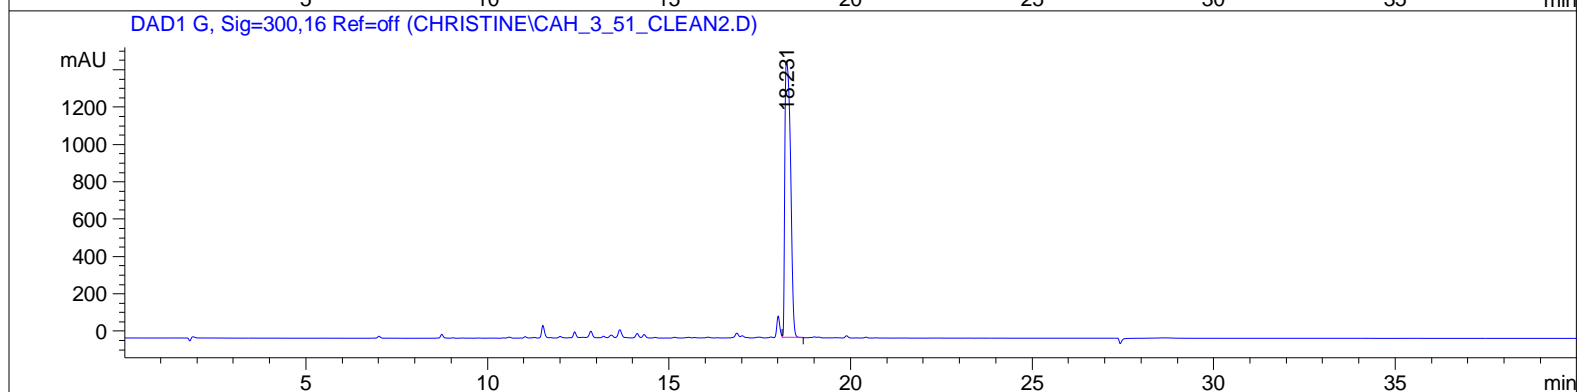

=====  
 Area Percent Report  
 =====

Sorted By : Signal  
 Multiplier : 1.0000  
 Dilution : 1.0000  
 Use Multiplier & Dilution Factor with ISTDs

Signal 1: DAD1 A, Sig=254,4 Ref=off

| Peak # | RetTime [min] | Type | Width [min] | Area [mAU*s] | Height [mAU] | Area %  |
|--------|---------------|------|-------------|--------------|--------------|---------|
| 1      | 12.846        | VB   | 0.0826      | 1498.54224   | 279.23978    | 3.5576  |
| 2      | 18.252        | VV   | 0.2144      | 4.06234e4    | 2365.51514   | 96.4424 |

Totals : 4.21219e4 2644.75491

Signal 2: DAD1 B, Sig=254,16 Ref=off

| Peak # | RetTime [min] | Type | Width [min] | Area [mAU*s] | Height [mAU] | Area %  |
|--------|---------------|------|-------------|--------------|--------------|---------|
| 1      | 12.846        | VB   | 0.0826      | 1700.93689   | 317.25293    | 3.9841  |
| 2      | 18.250        | VV   | 0.2824      | 4.09918e4    | 2386.45435   | 96.0159 |

**S156**

Sample Name: CAH\_3\_51\_Clean

Totals : 4.26927e4 2703.70728

Signal 3: DAD1 E, Sig=280,16 Ref=off

| Peak # | RetTime [min] | Type | Width [min] | Area [mAU*s] | Height [mAU] | Area %  |
|--------|---------------|------|-------------|--------------|--------------|---------|
| 1      | 18.235        | VB   | 0.2472      | 3.38849e4    | 2256.16064   | 93.6335 |
| 2      | 28.648        | BB   | 1.5395      | 2303.96753   | 18.24143     | 6.3665  |

Totals : 3.61888e4 2274.40207

Signal 4: DAD1 F, Sig=280,16 Ref=off

| Peak # | RetTime [min] | Type | Width [min] | Area [mAU*s] | Height [mAU] | Area %   |
|--------|---------------|------|-------------|--------------|--------------|----------|
| 1      | 18.235        | VB   | 0.2472      | 3.38849e4    | 2256.16064   | 100.0000 |

Totals : 3.38849e4 2256.16064

Signal 5: DAD1 G, Sig=300,16 Ref=off

| Peak # | RetTime [min] | Type | Width [min] | Area [mAU*s] | Height [mAU] | Area %   |
|--------|---------------|------|-------------|--------------|--------------|----------|
| 1      | 18.231        | VB   | 0.1840      | 1.62398e4    | 1479.67639   | 100.0000 |

Totals : 1.62398e4 1479.67639

=====  
\*\*\* End of Report \*\*\***S157**

# HRMS for compound 61

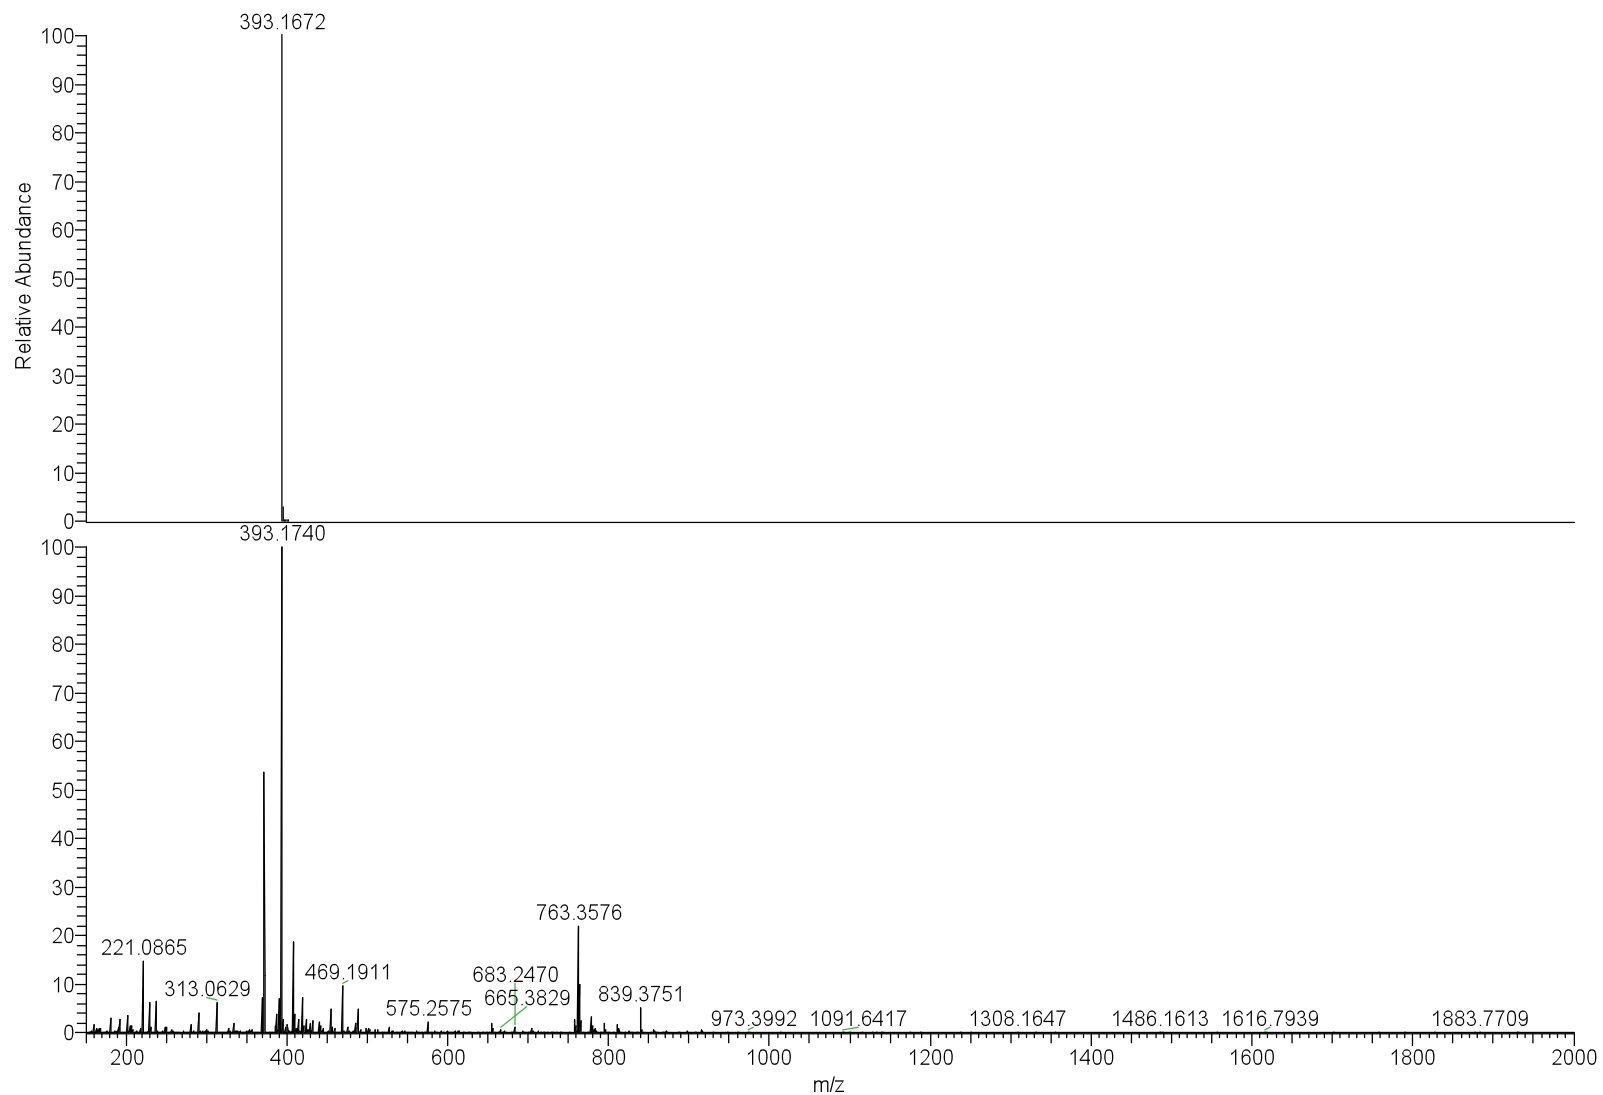

NL:  
7.77E5  
C<sub>22</sub>H<sub>26</sub>O<sub>5</sub>Na:  
C<sub>22</sub>H<sub>26</sub>O<sub>5</sub>Na<sub>1</sub>  
pa Chrg 1

NL:  
1.13E8  
CAH\_3\_51\_+  
ESI\_Orbi#13 RT:  
0.10 AV: 1 T: FTMS  
+ p ESI Full ms  
[150.00-2000.00]

**S158**

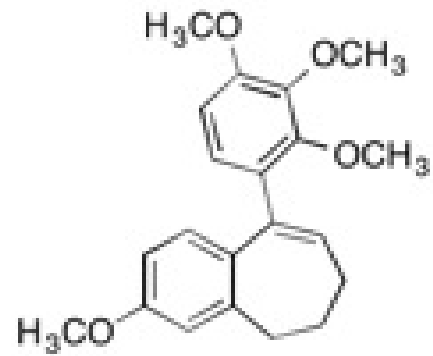

**62**

7.039  
7.022  
6.882  
6.877  
6.780  
6.775  
6.763  
6.758  
6.580  
6.421  
6.406  
6.392

4.144  
4.130  
3.906  
3.831  
3.816

2.699  
2.685  
2.671  
2.233  
2.219  
2.205  
2.191  
2.177  
2.050  
2.032  
2.018  
2.004  
1.989

1.290  
1.276  
1.262

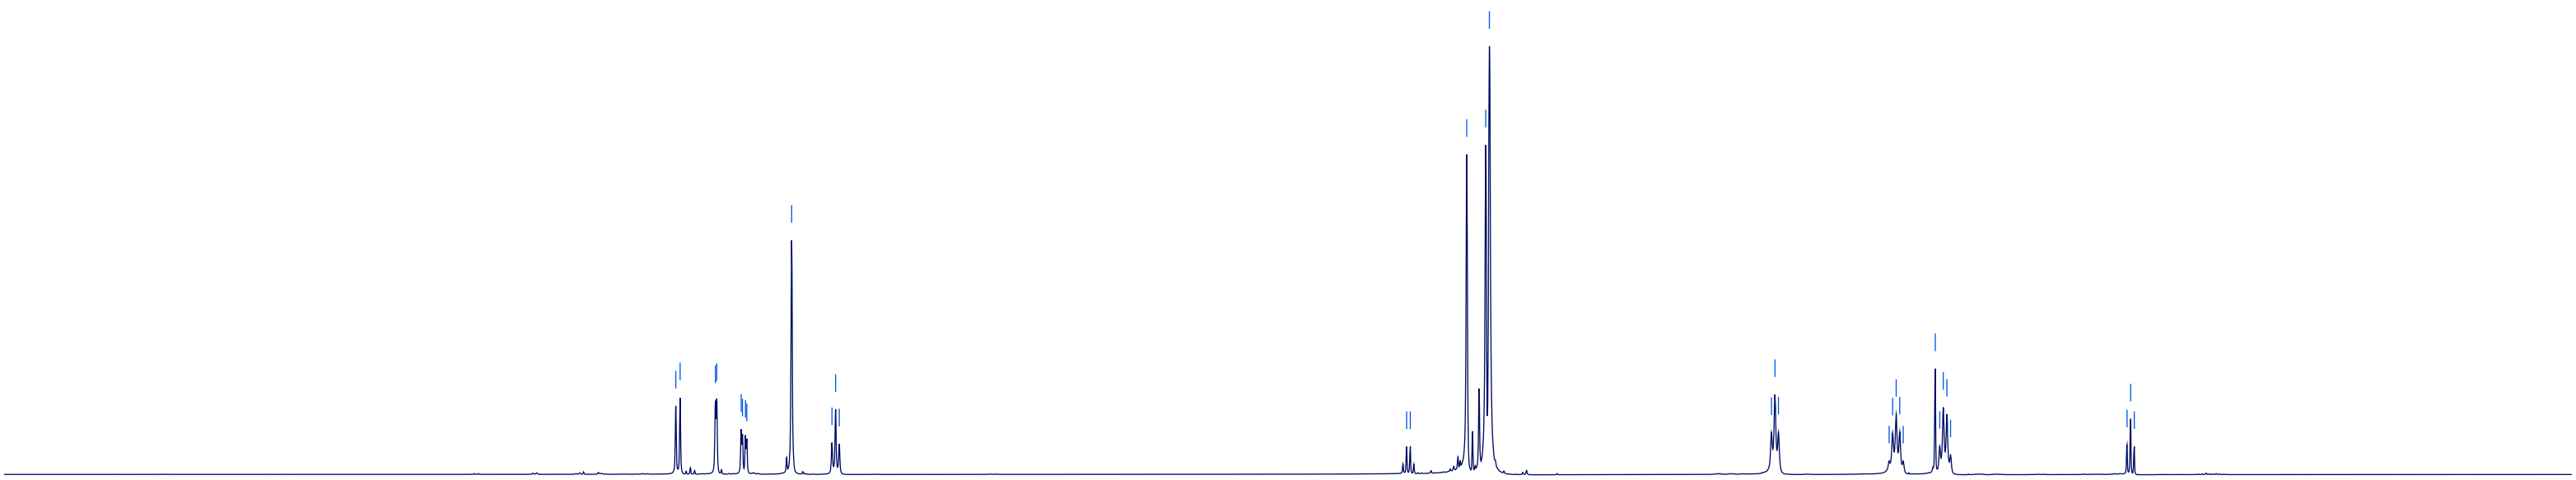

0.989  
1  
1.03  
2.03  
1.04

**S159**

2.94  
5.9  
3.01

1.89  
2.02  
1.97

ppm 9 8 7 6 5 4 3 2 1 0

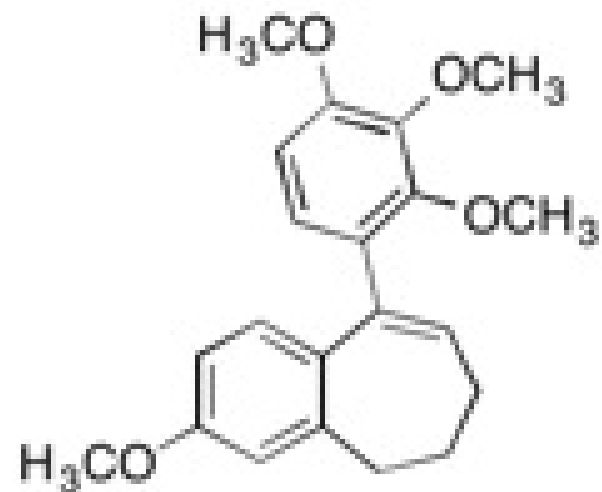

**62**

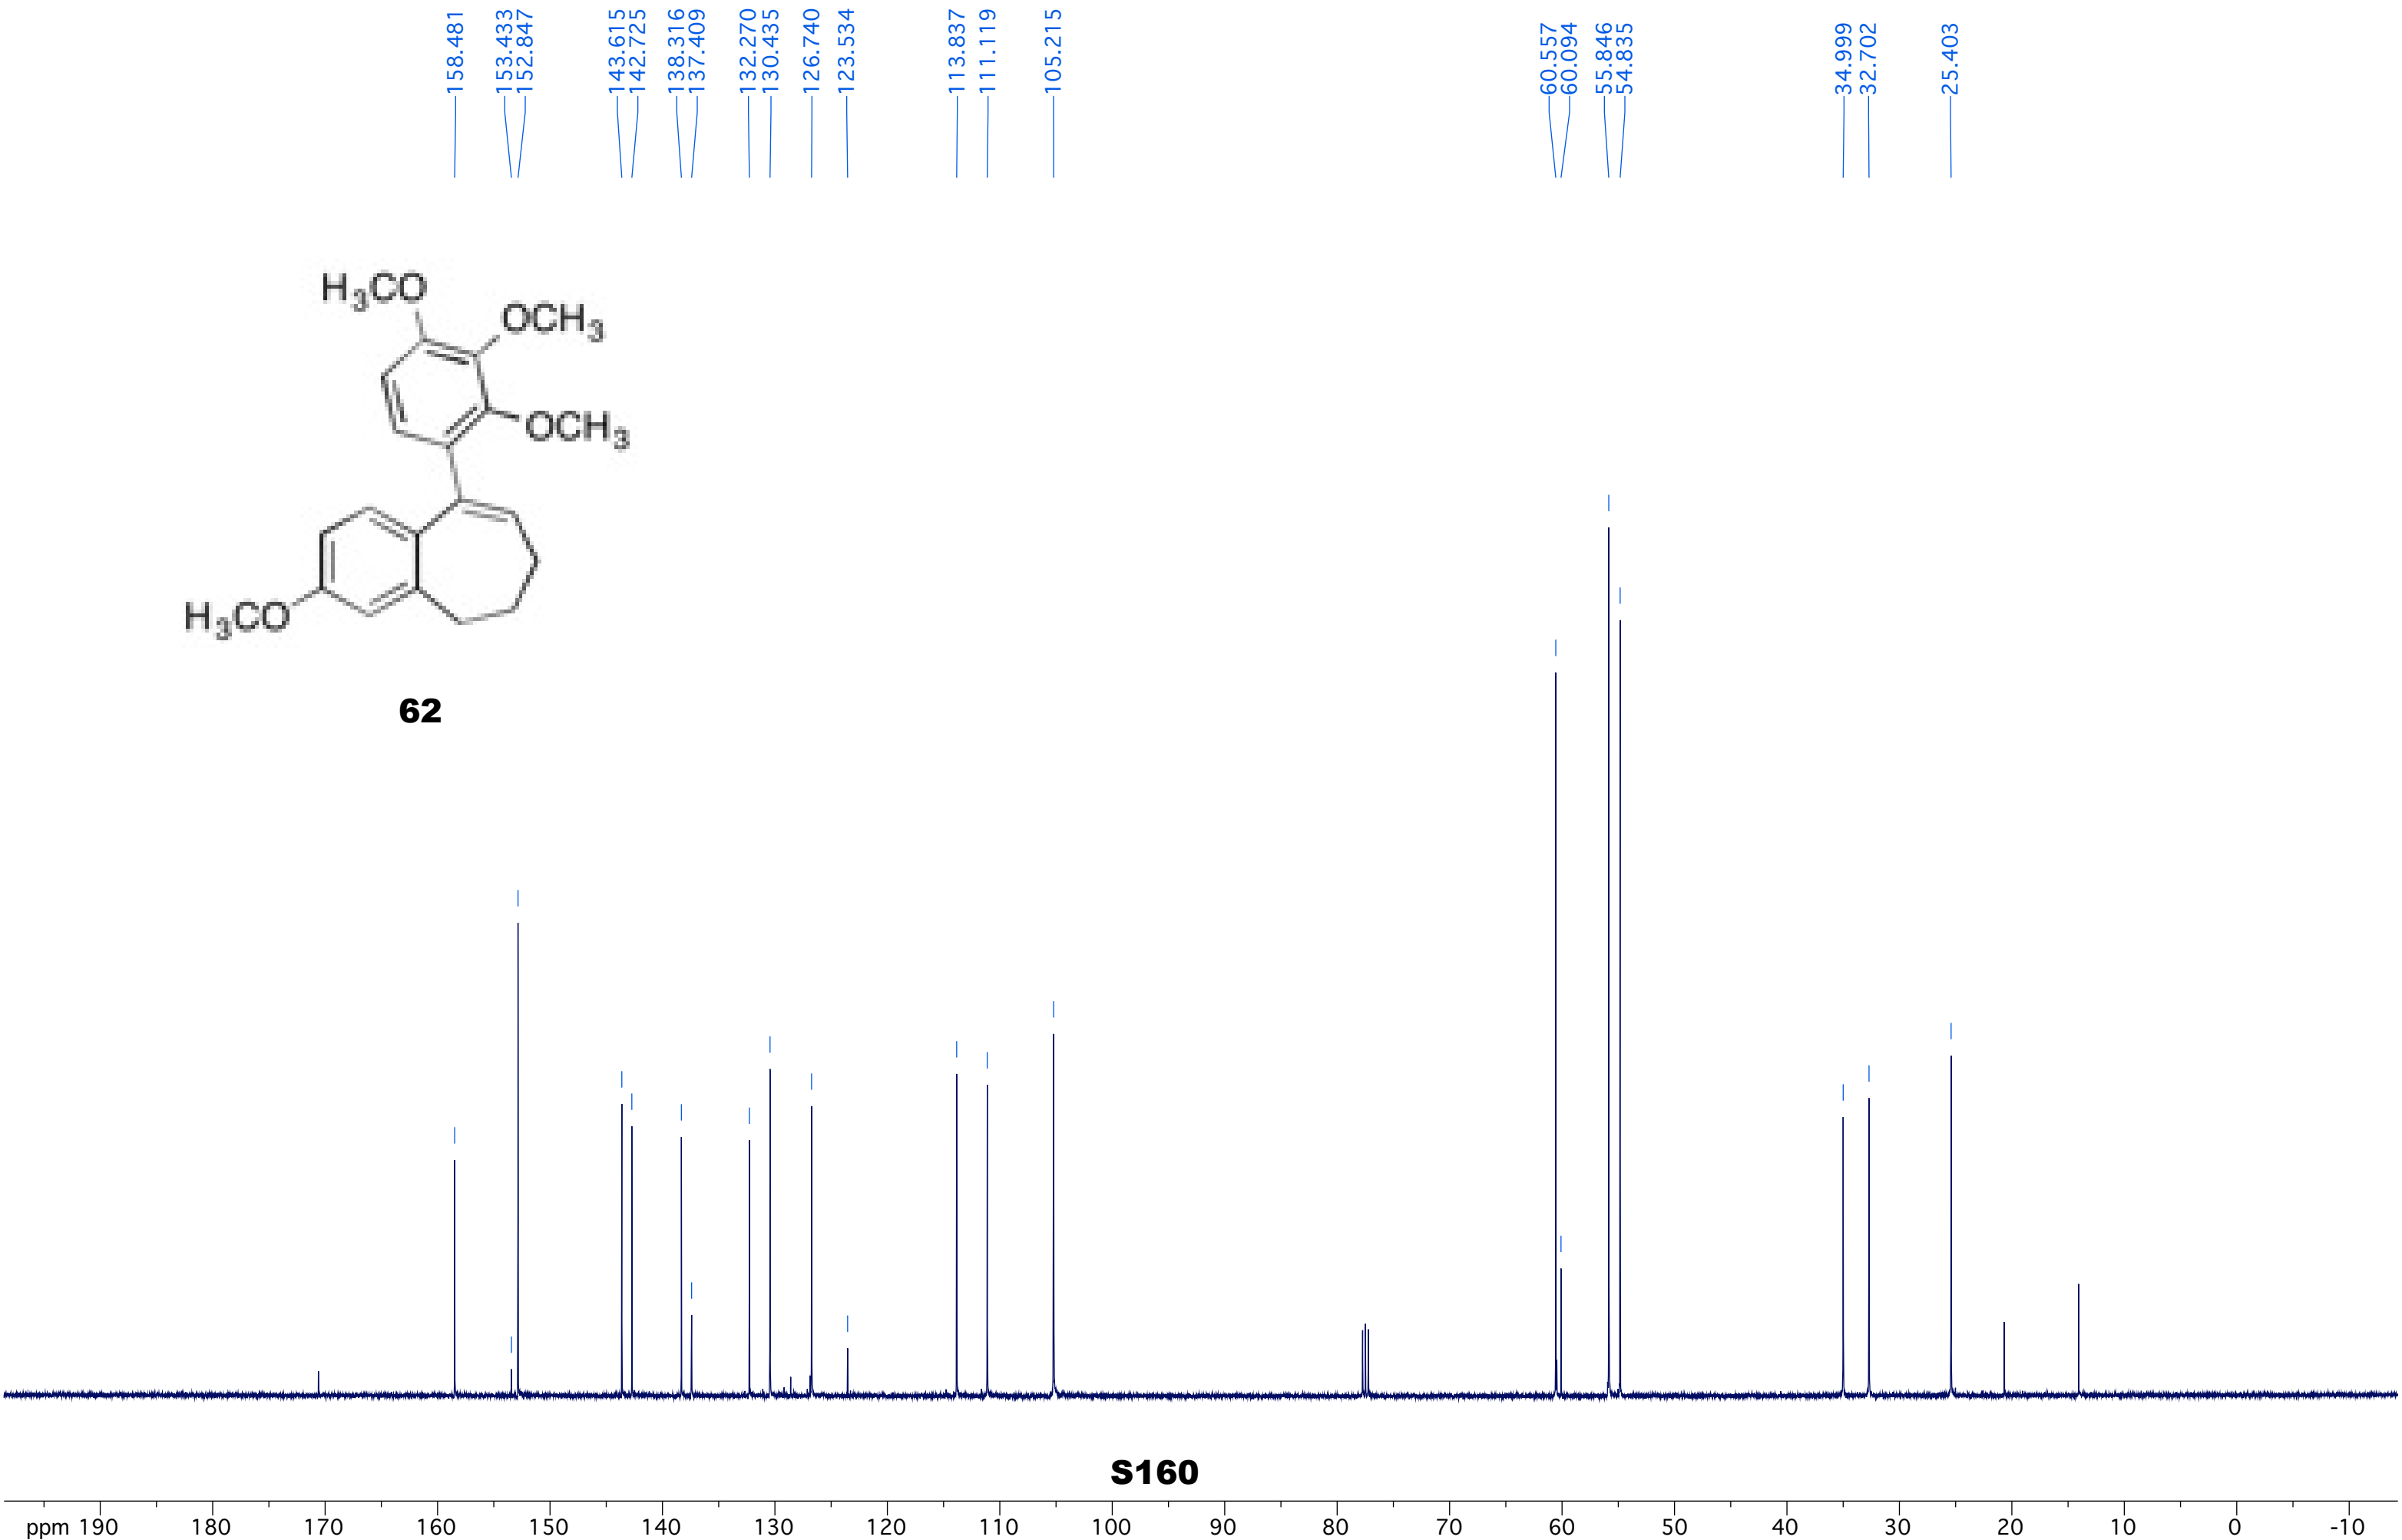



**HPLC for compound 62**

=====  
Acq. Operator : Christine  
Acq. Instrument : Instrument 1 Location : -  
Injection Date : 5/19/2014 1:03:12 PM  
Acq. Method : C:\CHEM32\1\METHODS\MASTERMETHOD.M  
Last changed : 5/19/2014 1:01:32 PM by Christine  
Analysis Method : C:\CHEM32\1\DATA\CHRISTINE\CAH\_4\_1800001.D\DA.M (MASTERMETHOD.M)  
Last changed : 5/19/2014 2:14:01 PM by Christine

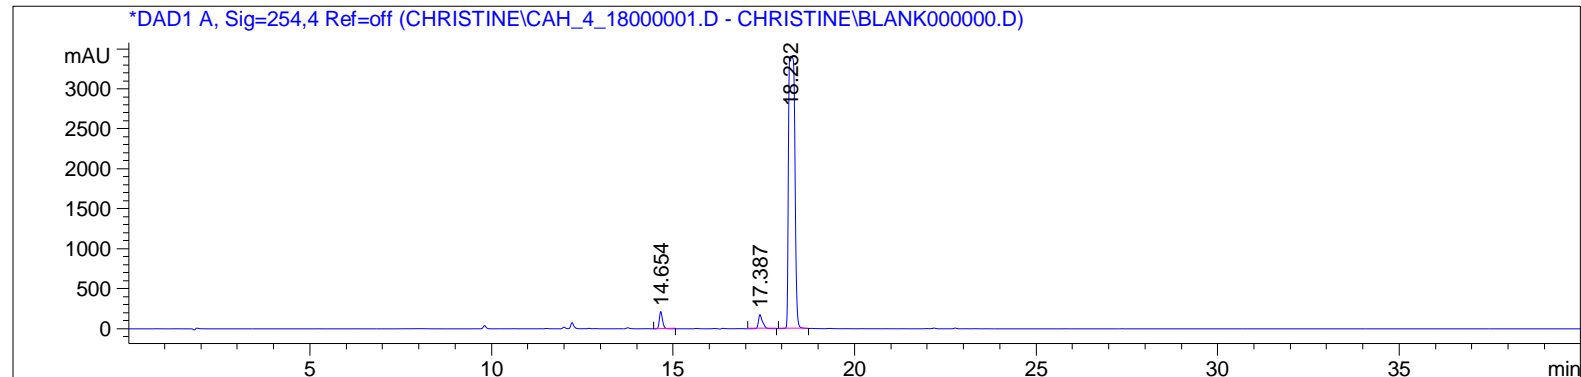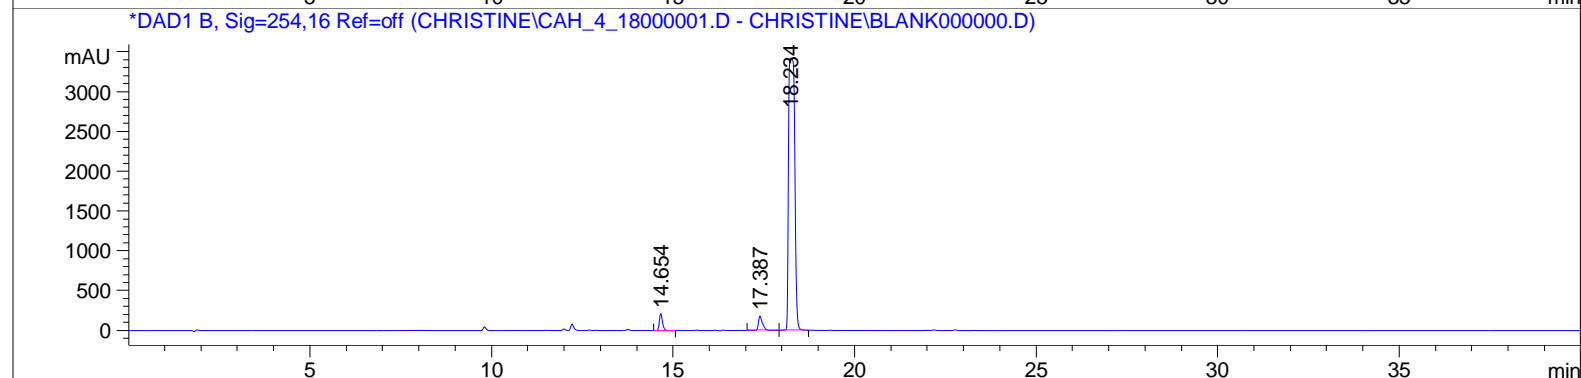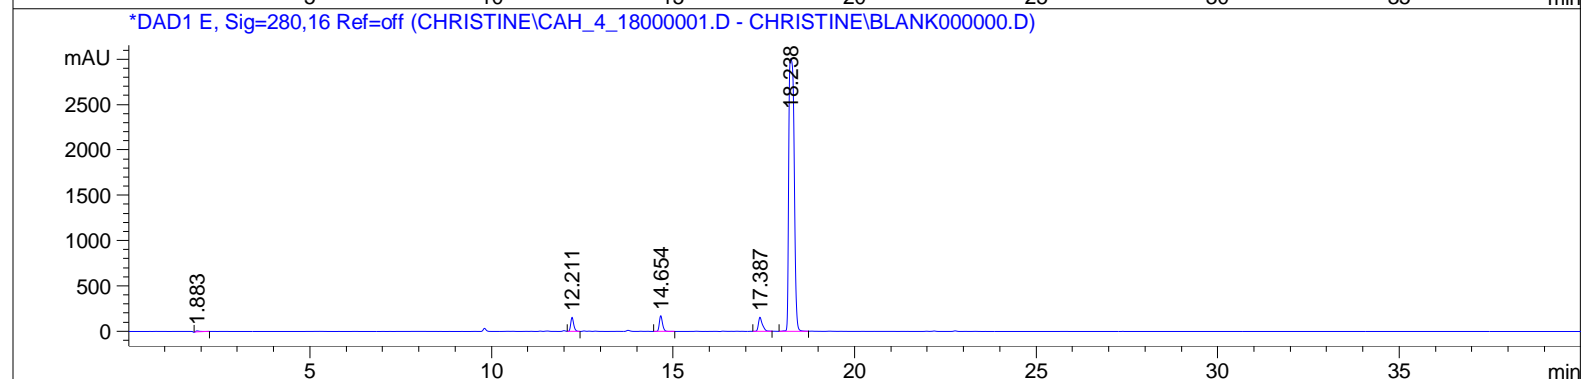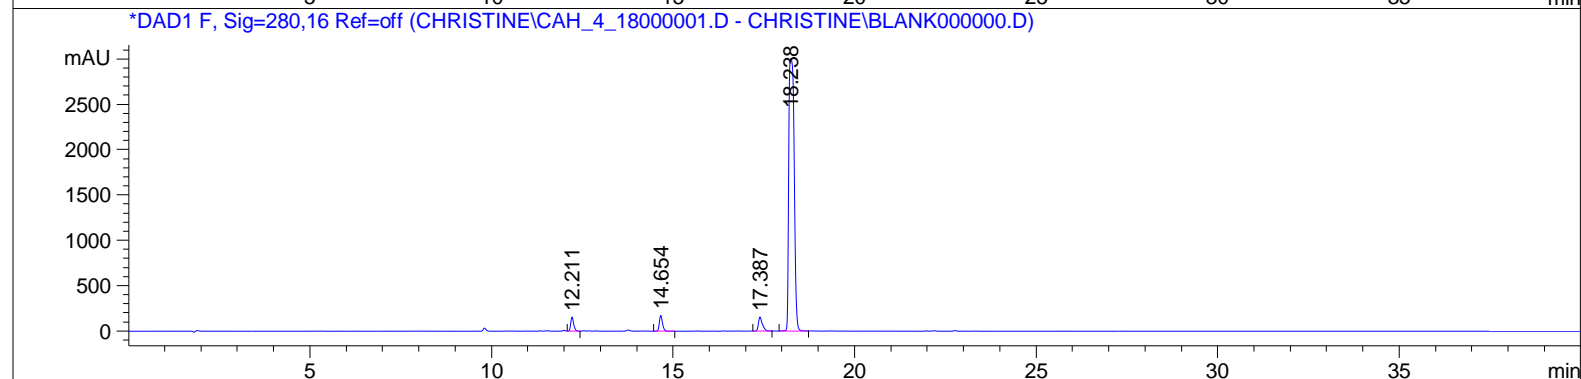**S161**

Sample Name: CAH\_4\_18

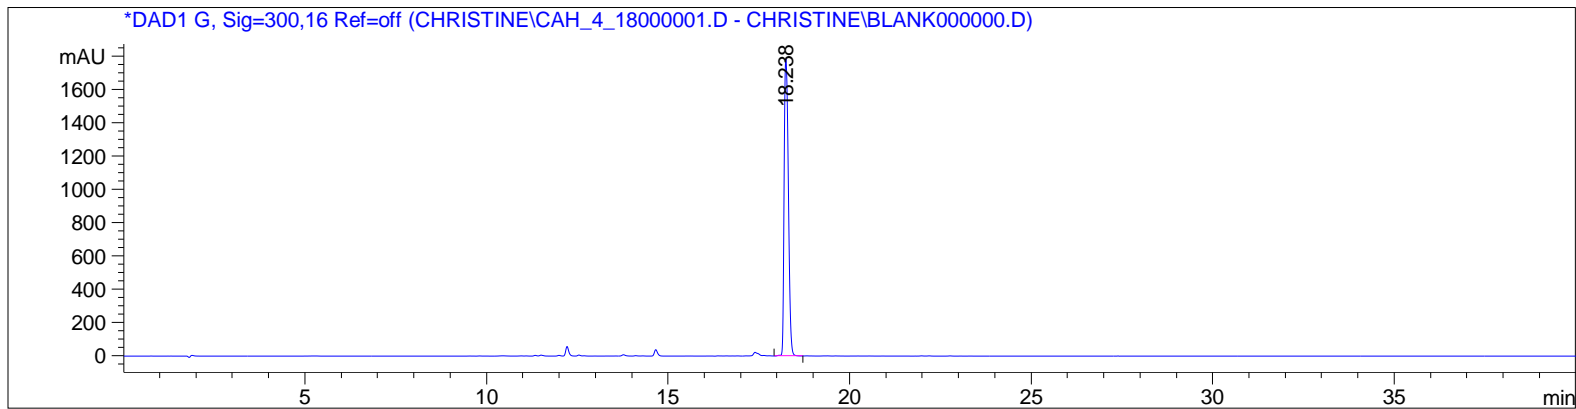

```
=====
                          Area Percent Report
=====
```

```
Sorted By           :      Signal
Multiplier          :      1.0000
Dilution            :      1.0000
Use Multiplier & Dilution Factor with ISTDs
```

Signal 1: DAD1 A, Sig=254,4 Ref=off

Signal has been modified after loading from rawdata file!

| Peak # | RetTime [min] | Type | Width [min] | Area [mAU*s] | Height [mAU] | Area %  |
|--------|---------------|------|-------------|--------------|--------------|---------|
| 1      | 14.654        | BB   | 0.0924      | 1296.31226   | 214.94673    | 2.9570  |
| 2      | 17.387        | BB   | 0.1137      | 1383.36279   | 176.06273    | 3.1556  |
| 3      | 18.232        | BV   | 0.1989      | 4.11593e4    | 3408.02661   | 93.8875 |

```
Totals :                      4.38390e4  3799.03607
```

Signal 2: DAD1 B, Sig=254,16 Ref=off

Signal has been modified after loading from rawdata file!

| Peak # | RetTime [min] | Type | Width [min] | Area [mAU*s] | Height [mAU] | Area %  |
|--------|---------------|------|-------------|--------------|--------------|---------|
| 1      | 14.654        | BB   | 0.0924      | 1277.60864   | 211.86137    | 2.9561  |
| 2      | 17.387        | BB   | 0.1133      | 1417.87061   | 181.21844    | 3.2806  |
| 3      | 18.234        | BV   | 0.1921      | 4.05239e4    | 3422.38574   | 93.7633 |

```
Totals :                      4.32194e4  3815.46556
```

**S162**



# HRMS for compound 62

CAH-4-18

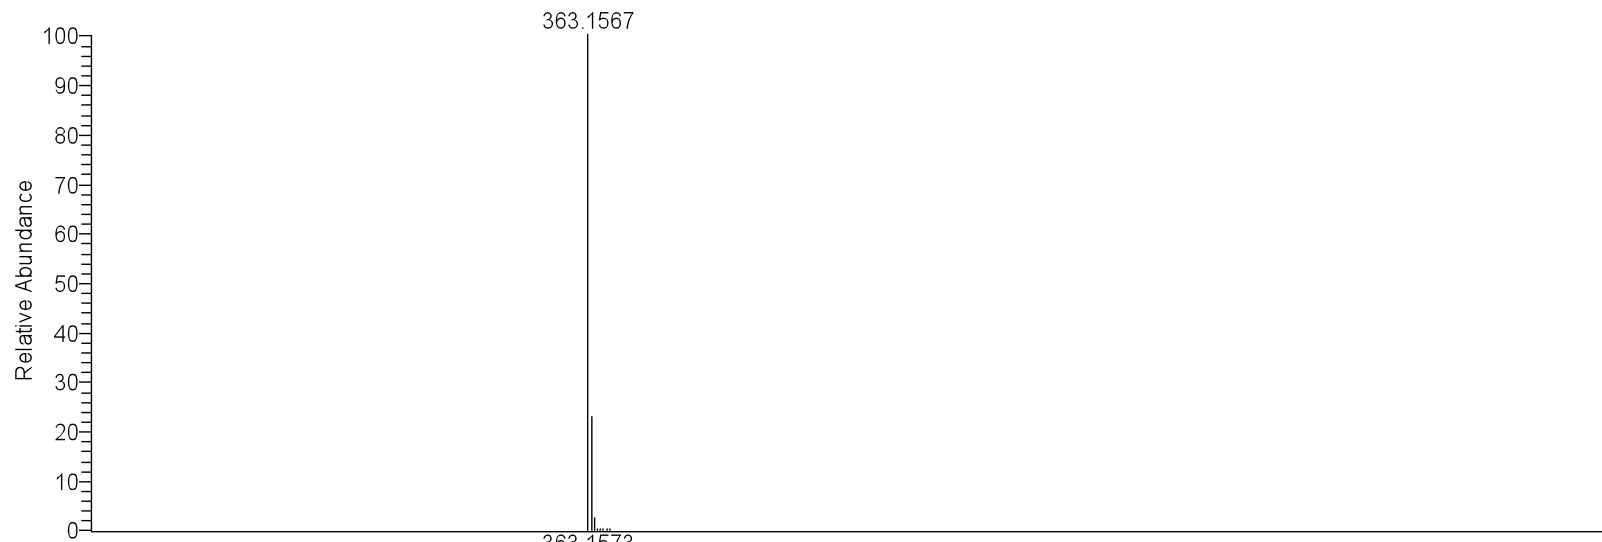

NL:  
7.88E5  
C<sub>21</sub>H<sub>24</sub>O<sub>4</sub>Na:  
C<sub>21</sub>H<sub>24</sub>O<sub>4</sub>Na<sub>1</sub>  
pa Chrg 1

NL:  
4.21E8  
CAH\_4\_13\_orbi  
pos#1 RT: 0.00  
AV: 1 T: FTMS + p  
ESI Full ms  
[200.00-700.00]

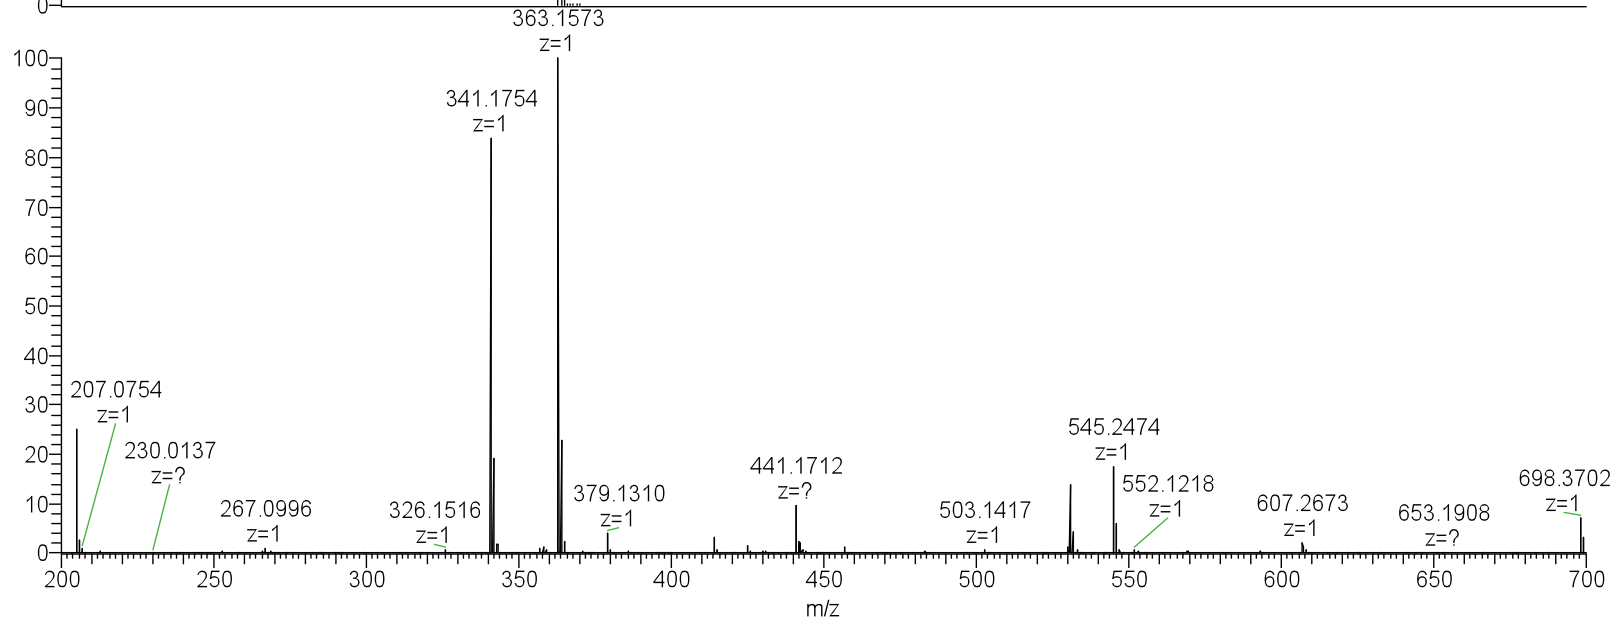

S164

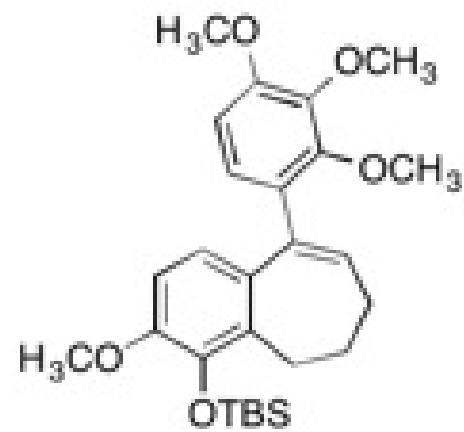

**63**

6.926  
6.909  
6.649  
6.632  
6.604  
6.588  
6.454  
6.438  
6.115  
6.101  
6.087

3.870  
3.832  
3.757

3.383

2.898  
2.885  
2.871

2.151  
2.137  
2.123  
2.109  
2.095  
1.981  
1.967  
1.952  
1.938

1.046

0.215

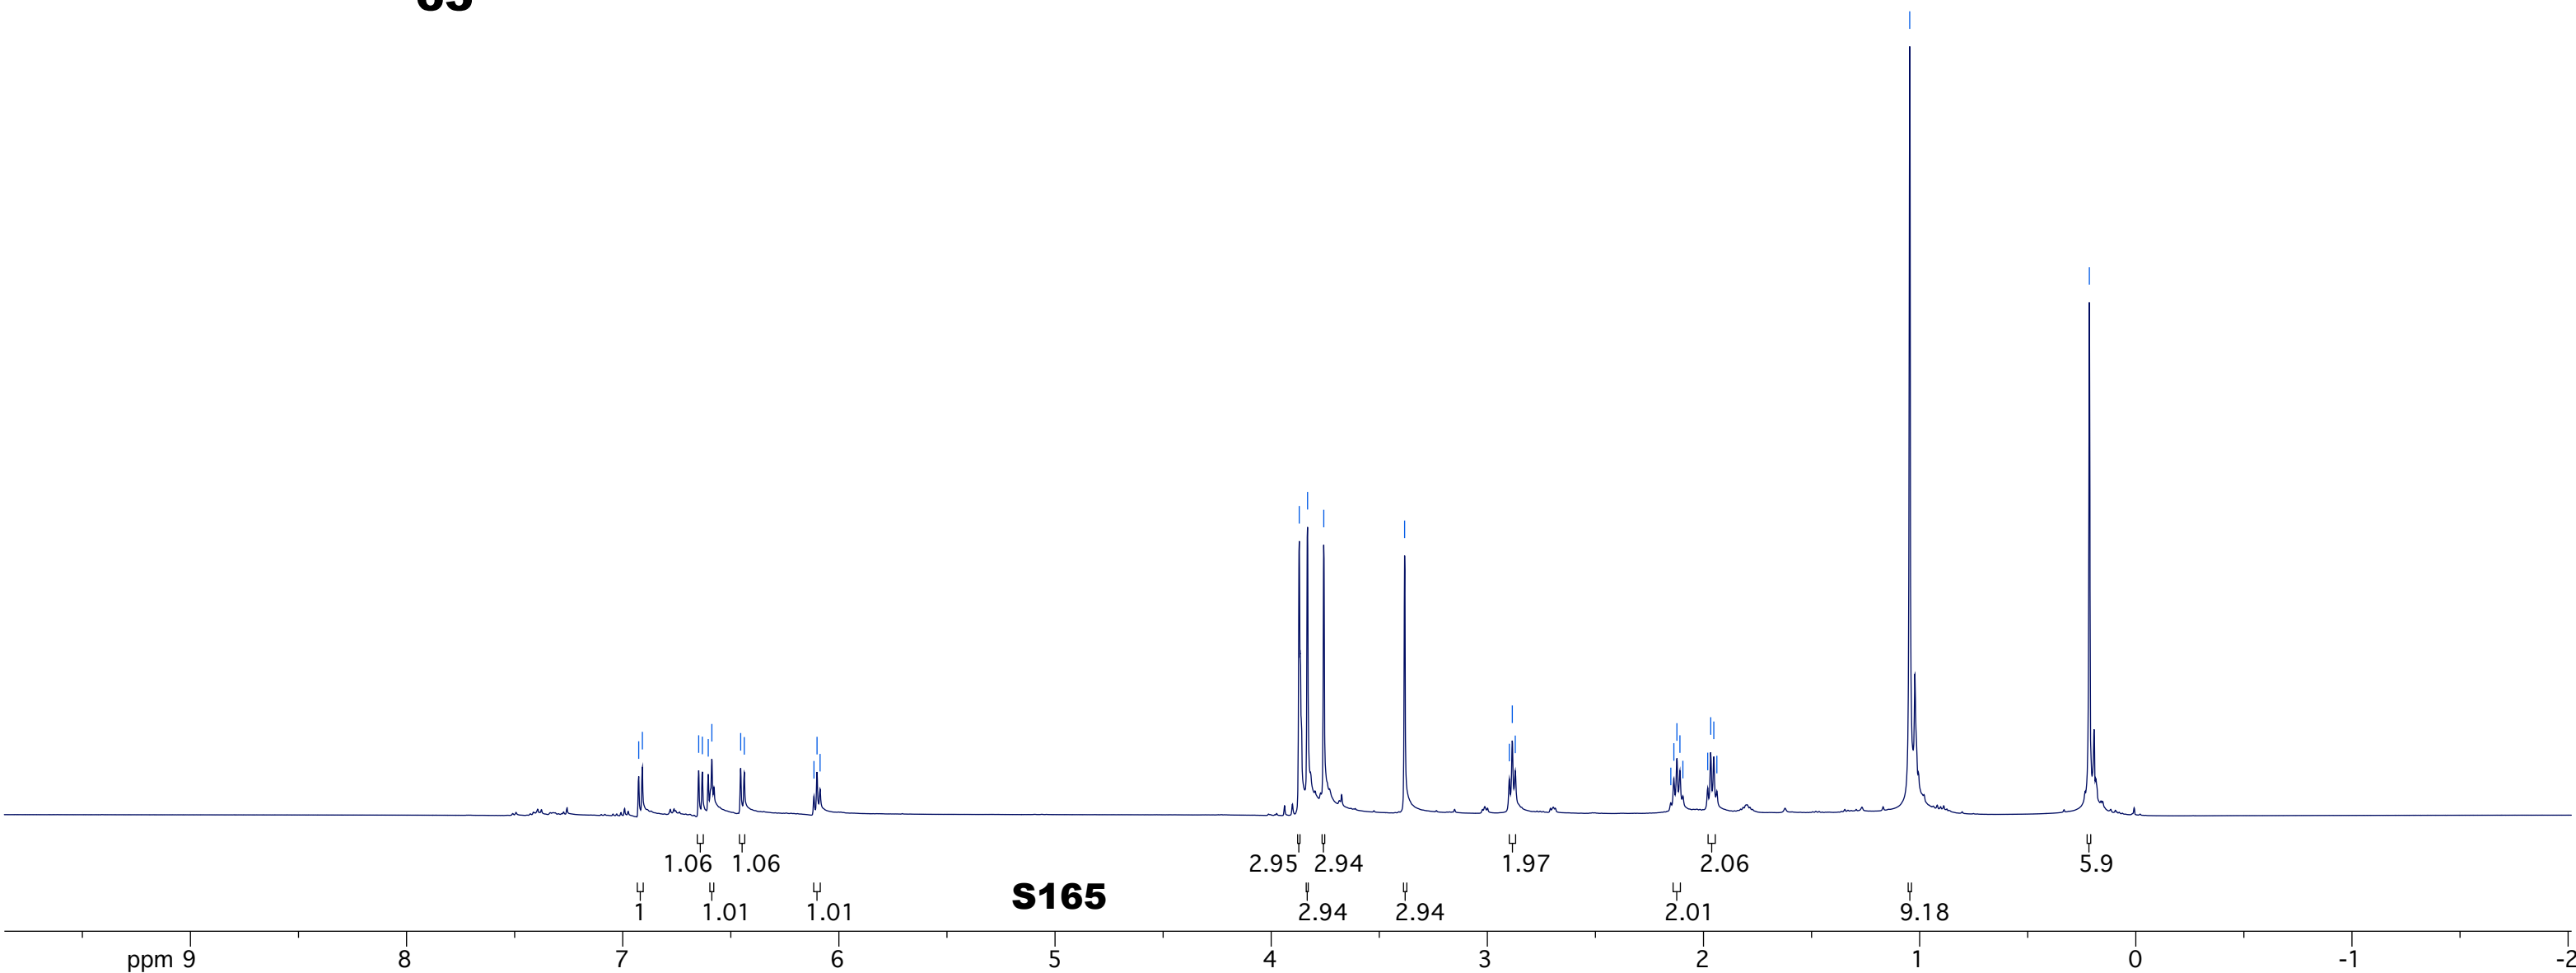

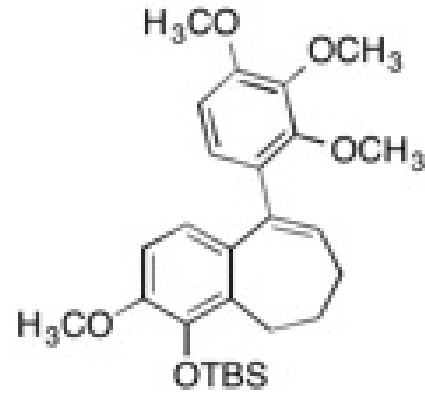

**63**

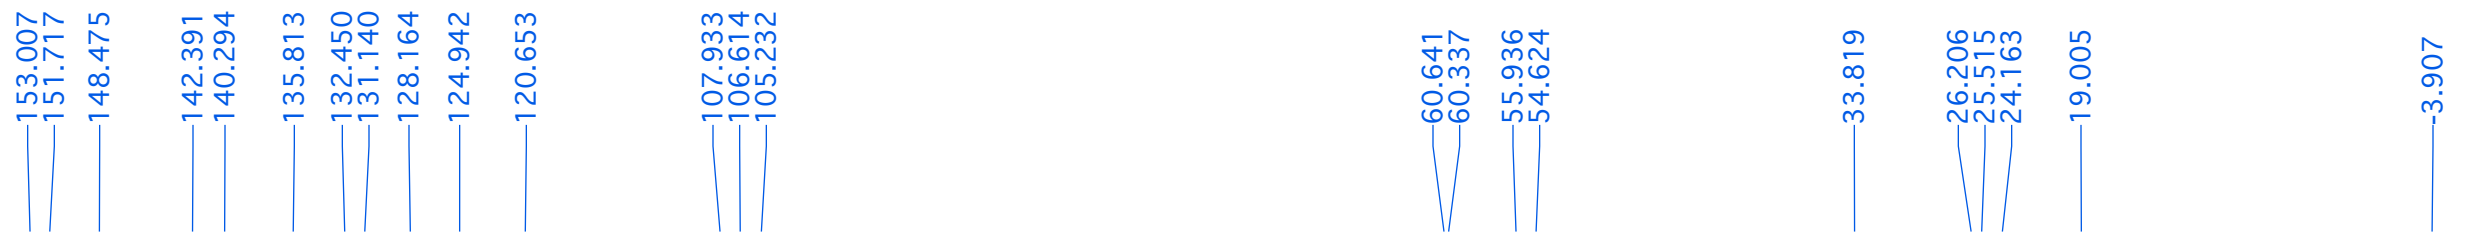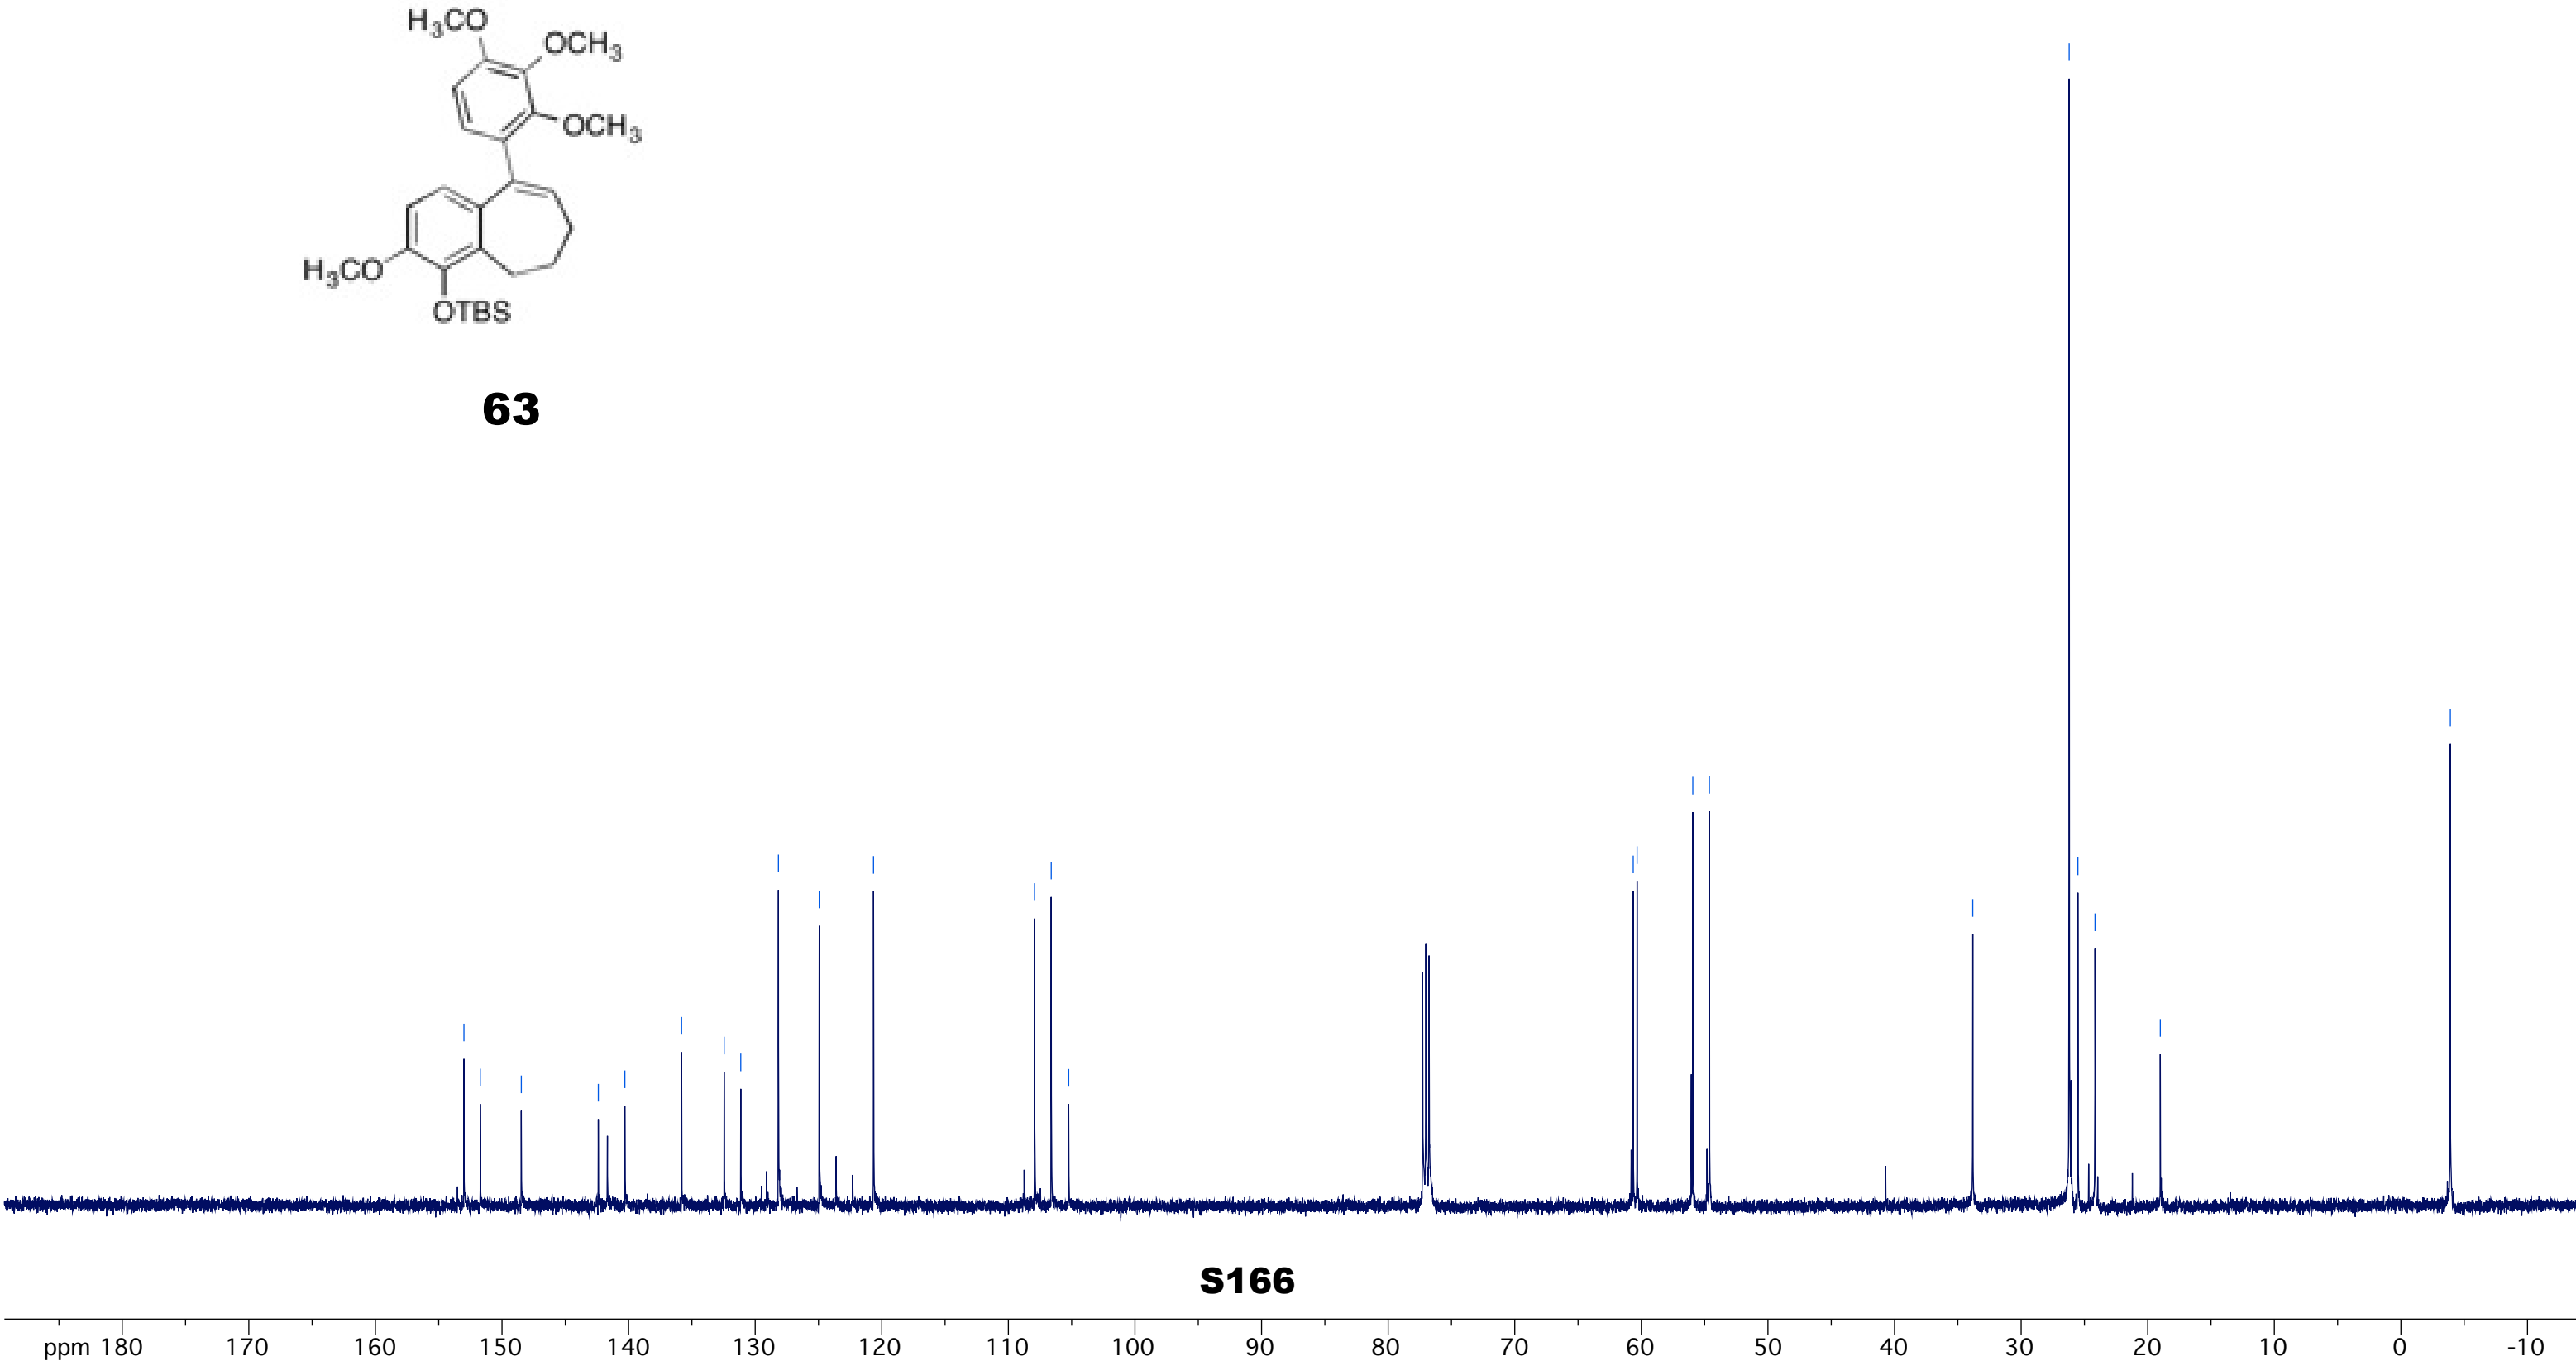

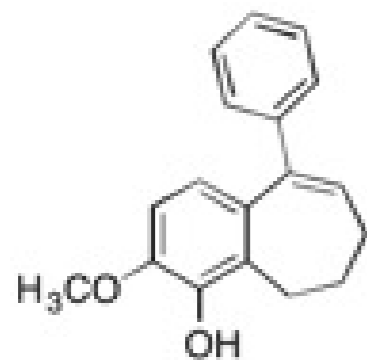

**64**

7.305  
7.297  
7.288  
7.285  
7.277  
7.270  
7.268  
7.259  
6.723  
6.706  
6.554  
6.537  
6.397  
6.382  
6.367

5.765

3.911

2.799  
2.785  
2.771  
2.186  
2.172  
2.157  
2.143  
2.129  
2.018  
2.004  
1.989  
1.975

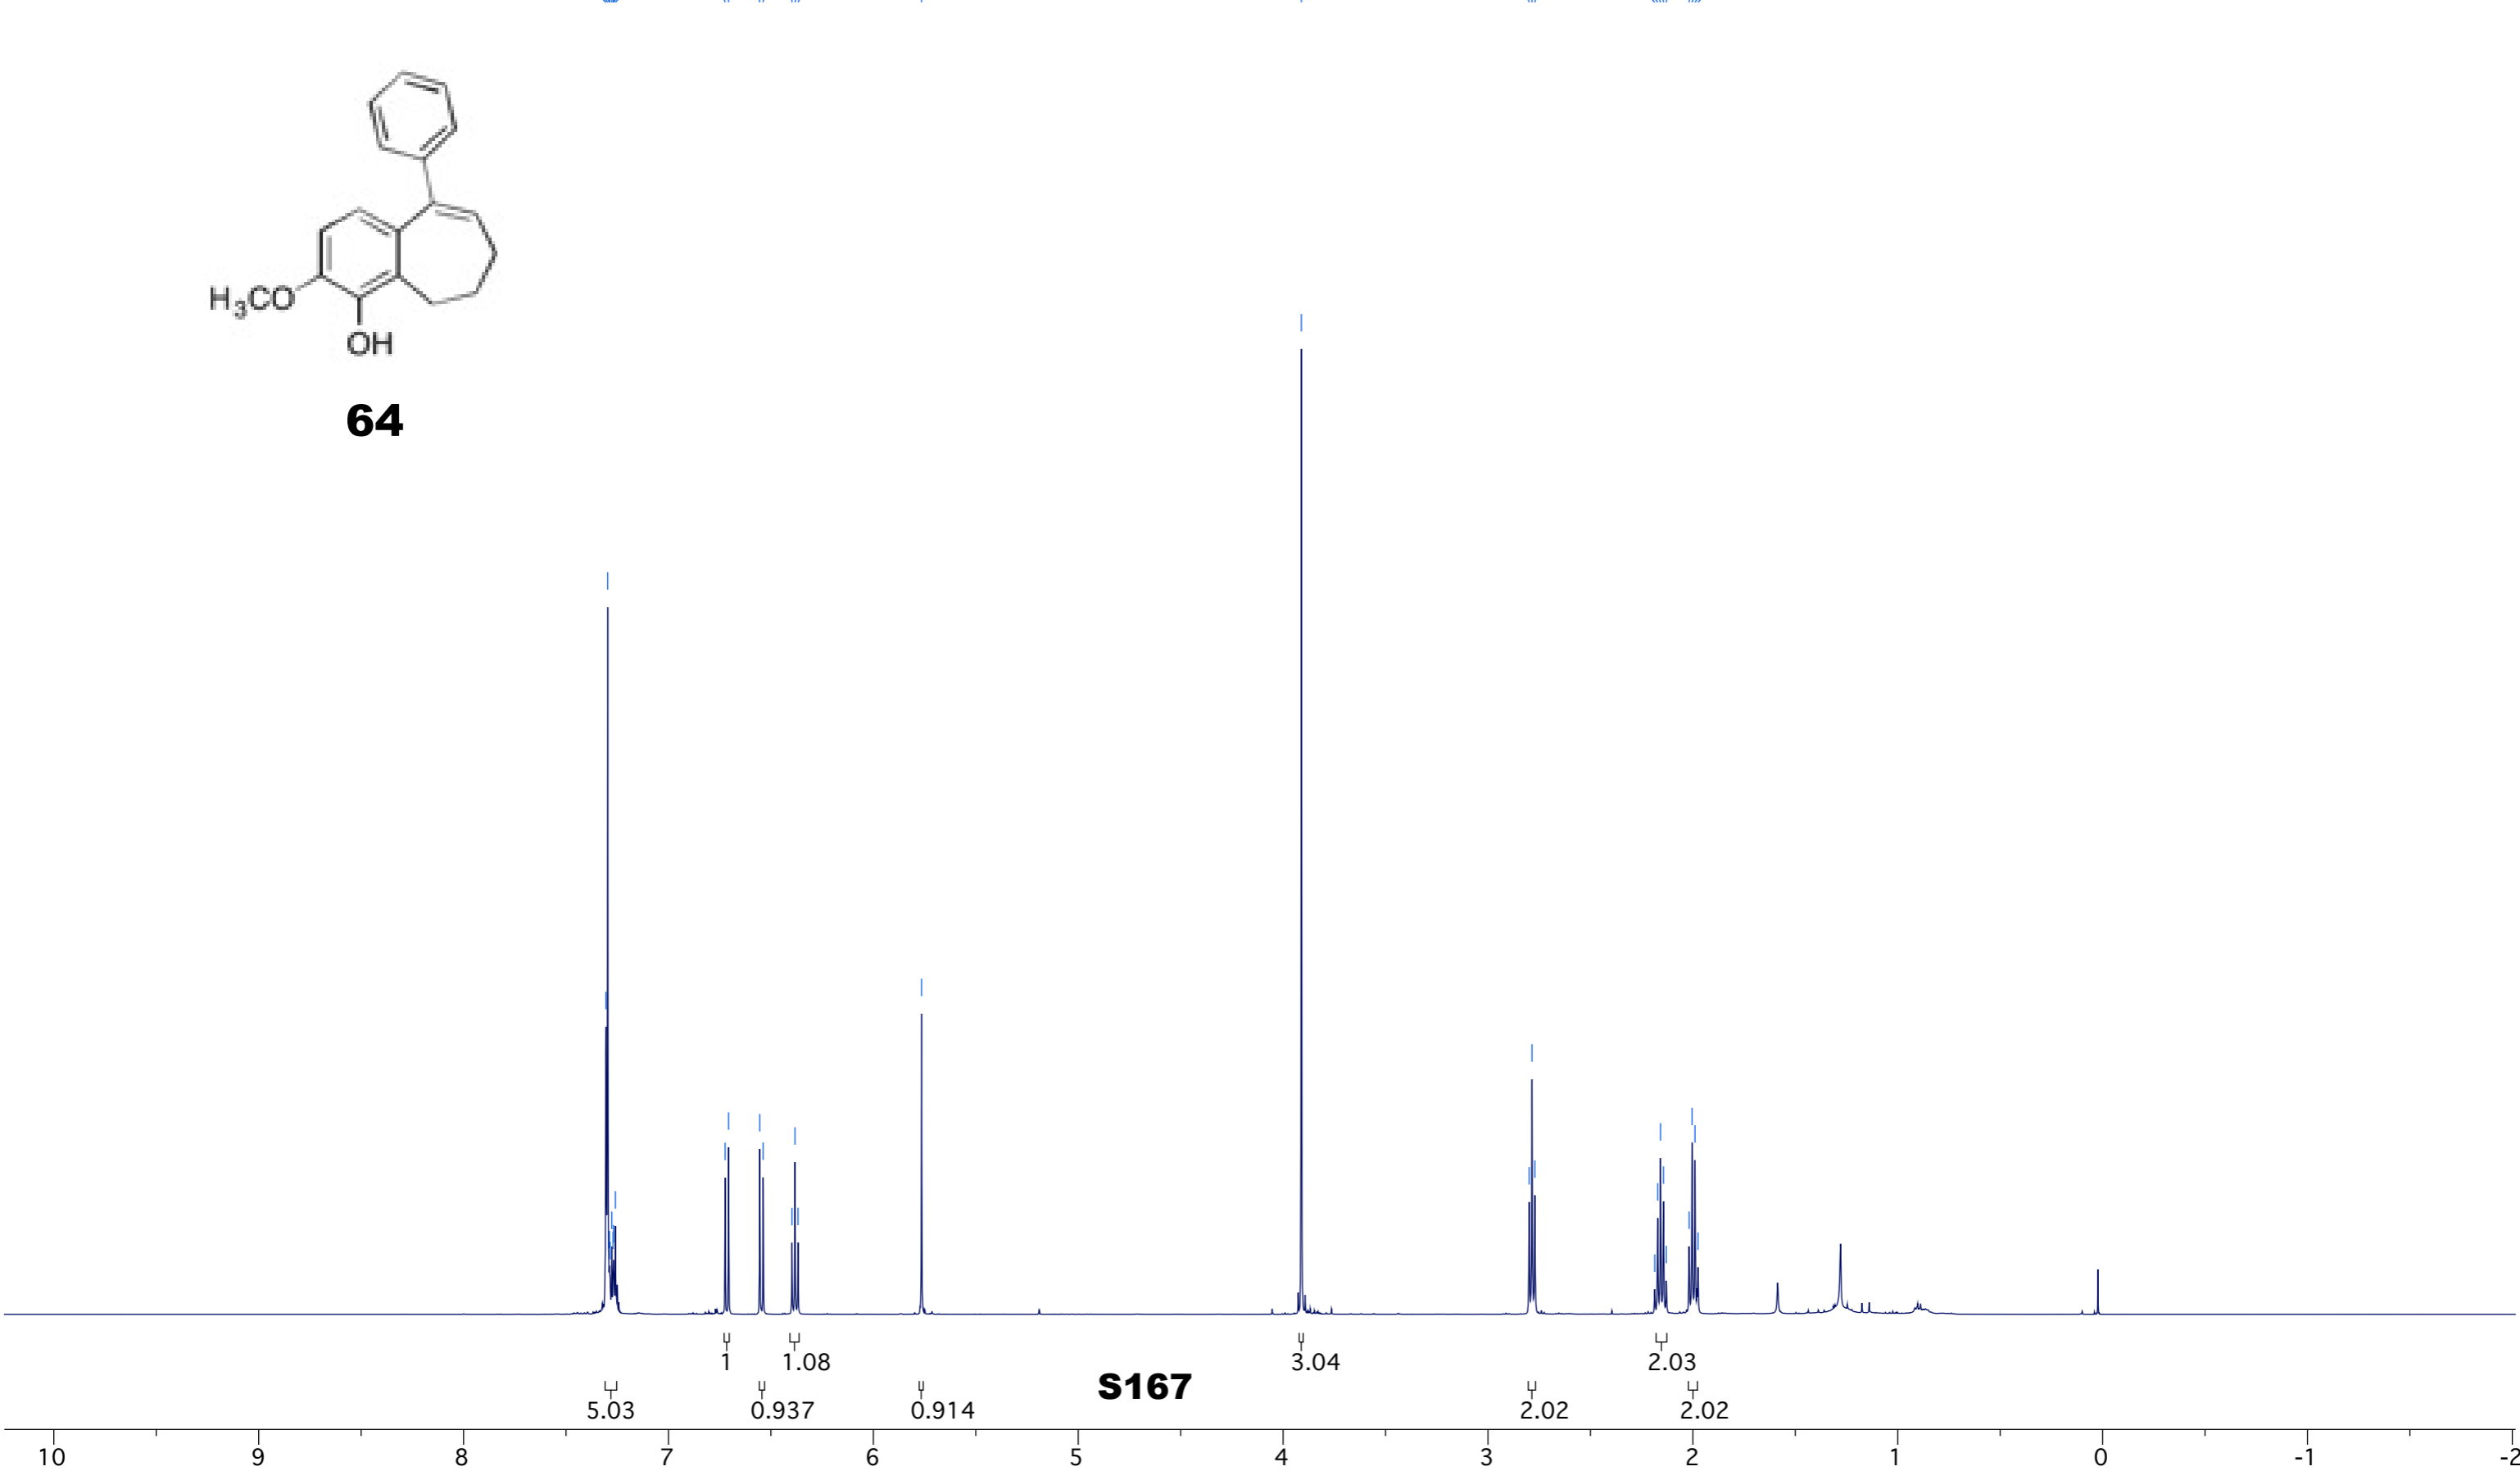

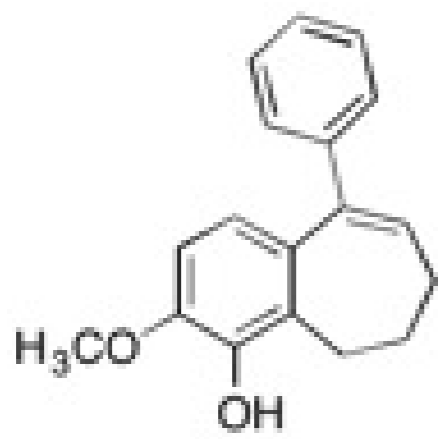

**64**

144.995  
142.764  
142.663  
142.362  
134.584  
128.022  
127.998  
127.778  
127.649  
126.851  
120.614  
107.663  
55.944  
33.547  
25.729  
23.497

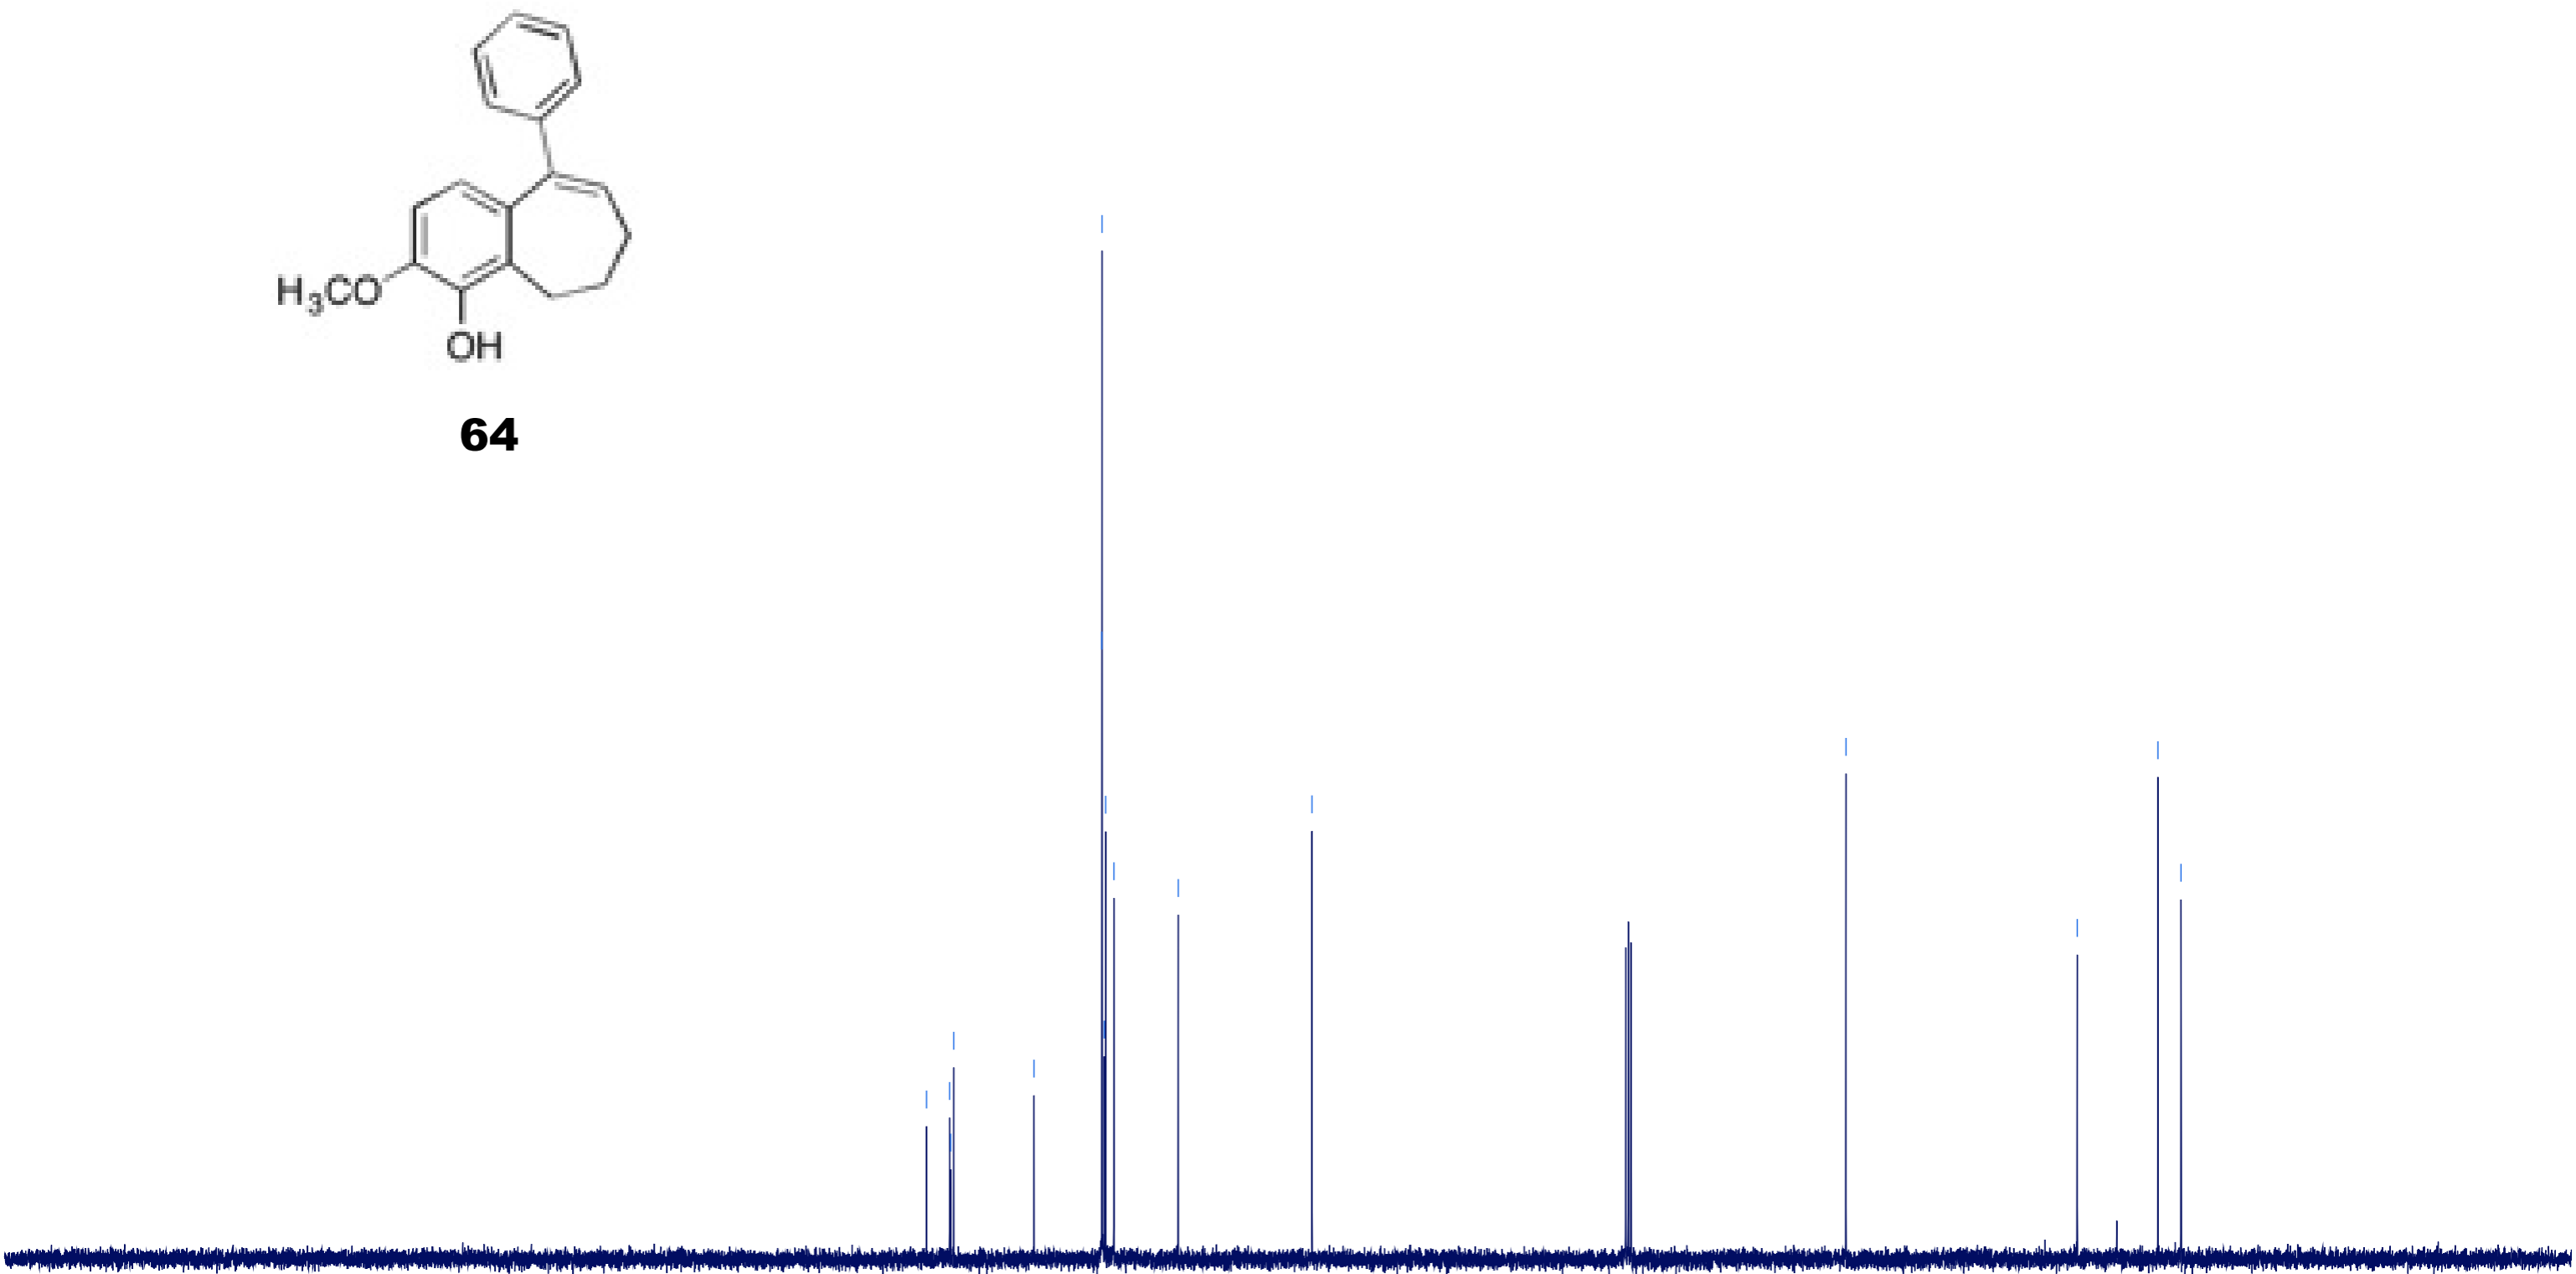

**S168**

230 220 210 200 190 180 170 160 150 140 130 120 110 100 90 80 70 60 50 40 30 20 10 0 -10



**HPLC for compound 64**

=====

Acq. Operator : Christine  
Acq. Instrument : Instrument 1 Location : -  
Injection Date : 12/30/2013 10:46:04 AM  
Acq. Method : C:\CHEM32\1\METHODS\MASTERMETHOD.M  
Last changed : 12/30/2013 10:42:27 AM by Christine  
Analysis Method : C:\CHEM32\1\DATA\CHRISTINE\TG\_1\_77000003.D\DA.M (MASTERMETHOD.M)  
Last changed : 5/19/2014 12:27:06 PM by Christine

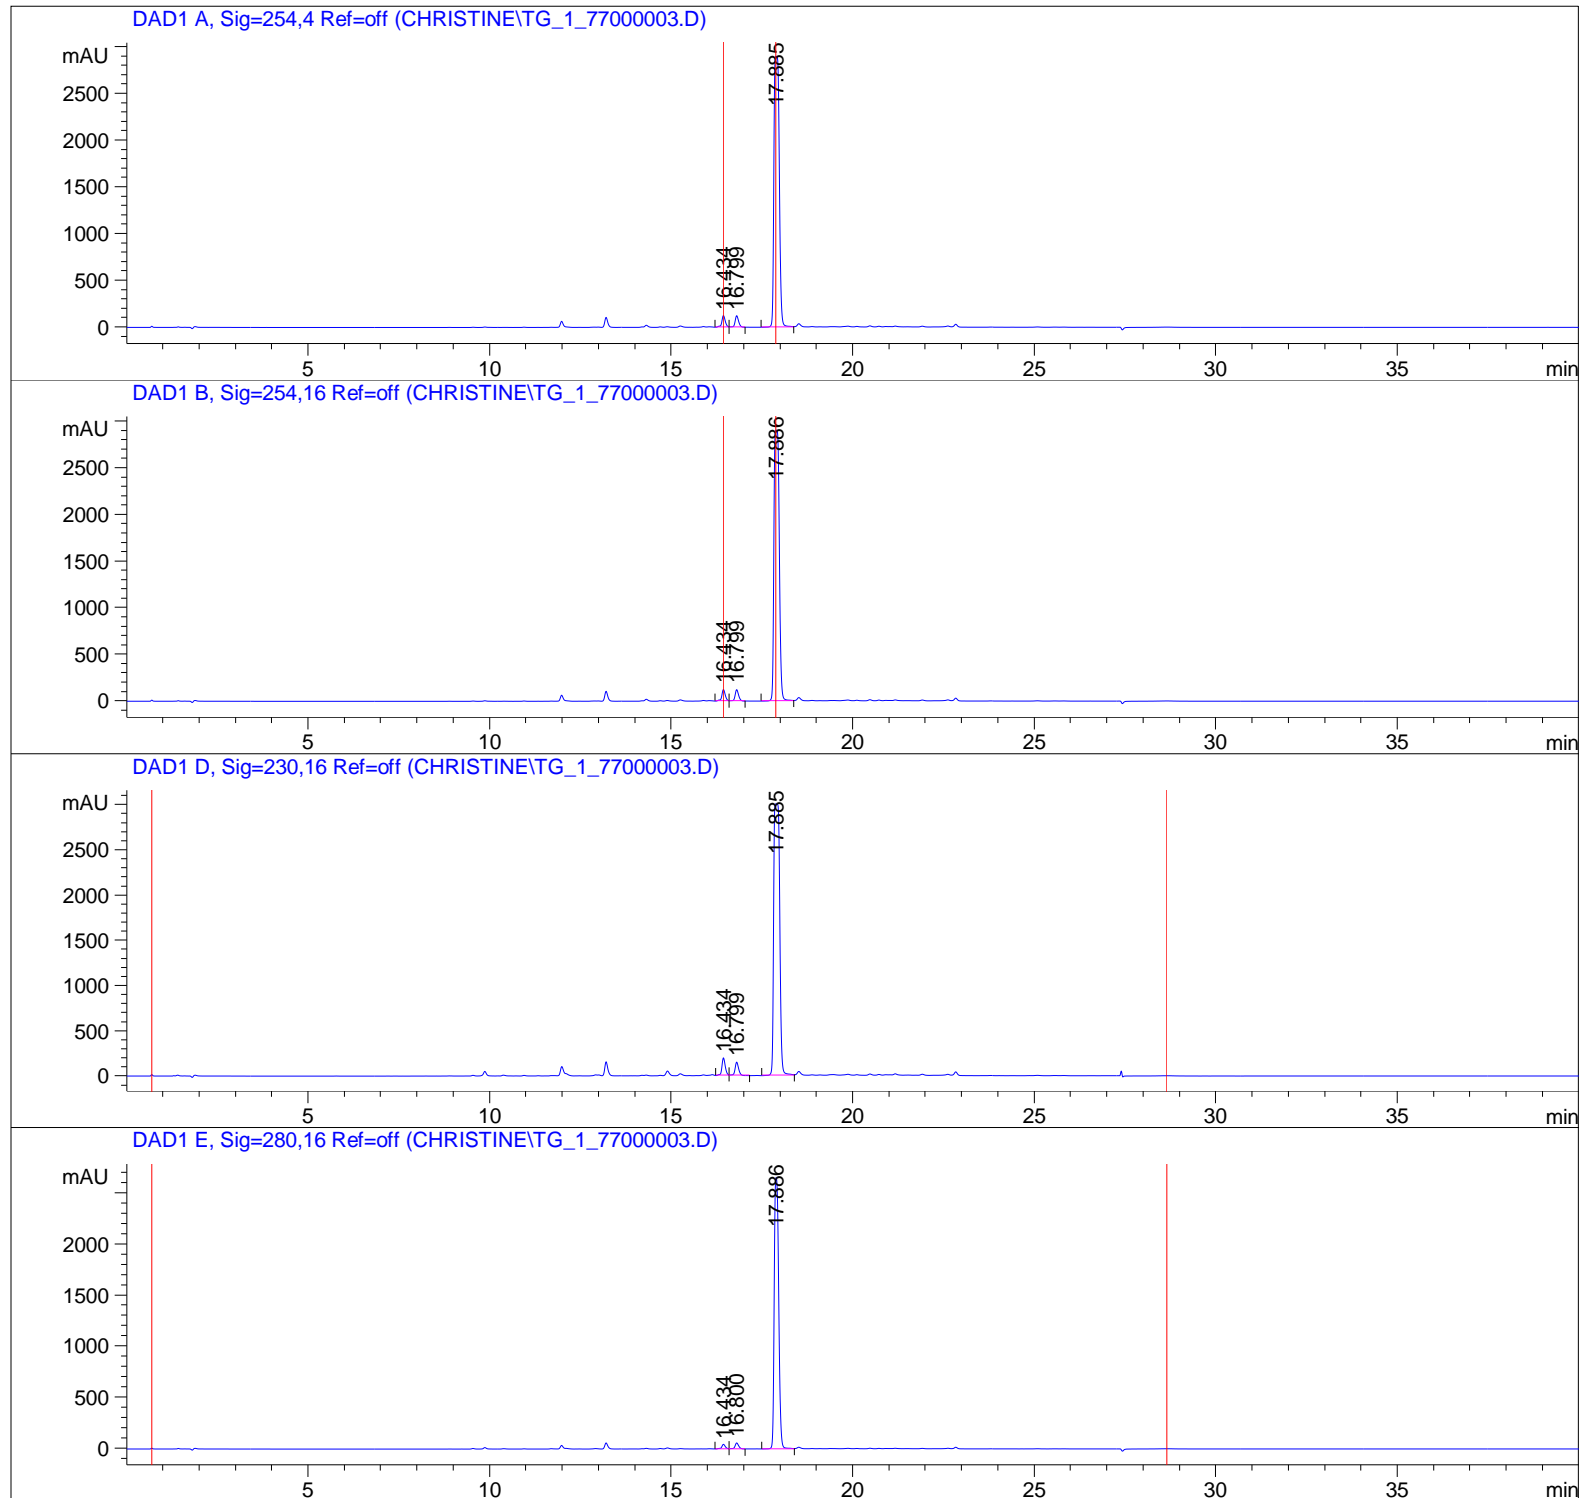**S169**

Sample Name: TG-1-77

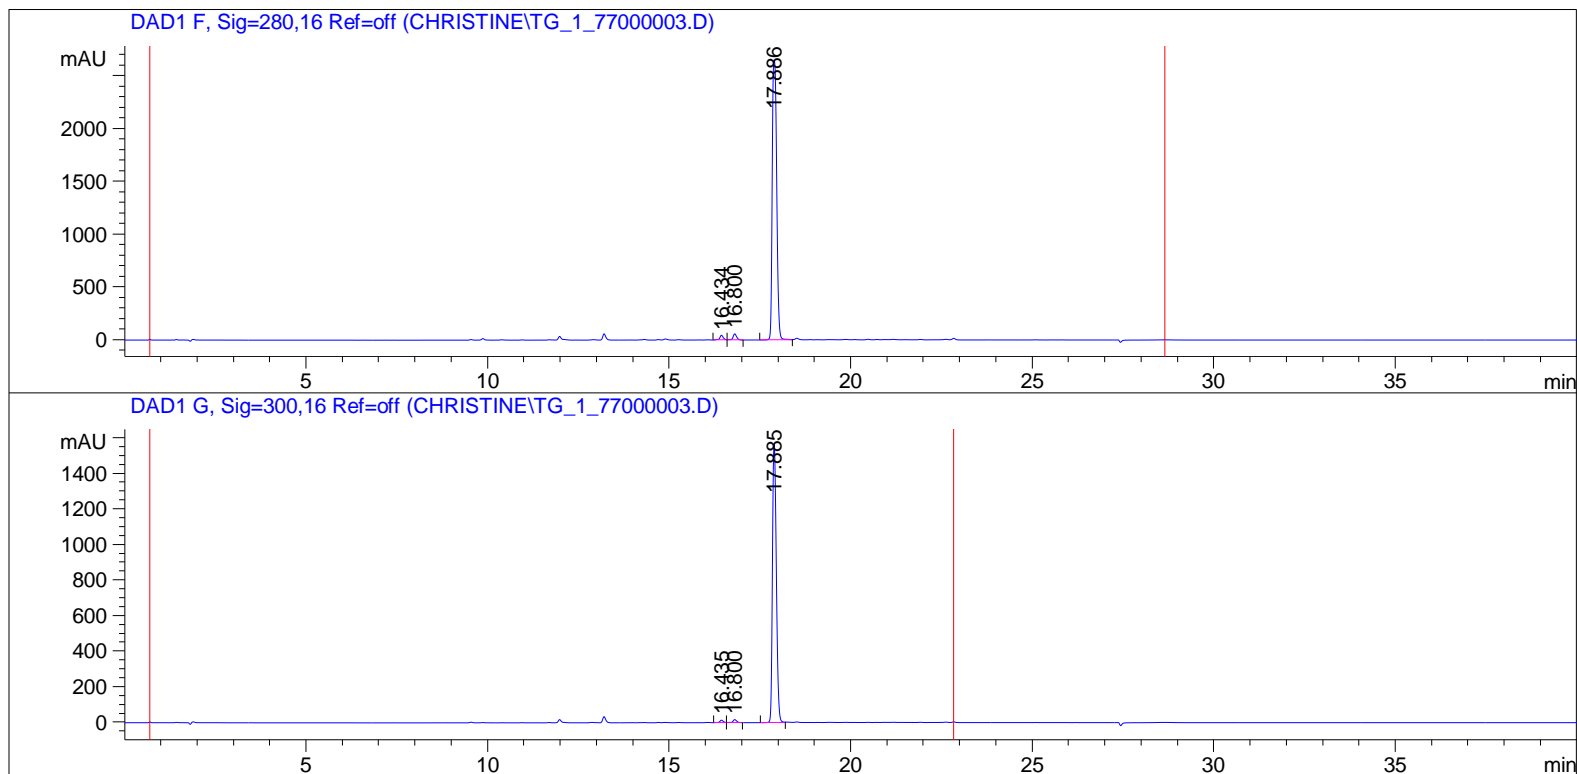

=====  
 Area Percent Report  
 =====

Sorted By : Signal  
 Multiplier : 1.0000  
 Dilution : 1.0000  
 Use Multiplier & Dilution Factor with ISTDs

Signal 1: DAD1 A, Sig=254,4 Ref=off

| Peak # | RetTime [min] | Type | Width [min] | Area [mAU*s] | Height [mAU] | Area %  |
|--------|---------------|------|-------------|--------------|--------------|---------|
| 1      | 16.434        | BV   | 0.1007      | 842.14648    | 124.77140    | 2.7087  |
| 2      | 16.799        | VB   | 0.1029      | 830.52429    | 122.81729    | 2.6713  |
| 3      | 17.885        | BV   | 0.1644      | 2.94180e4    | 2897.86890   | 94.6200 |

Totals : 3.10907e4 3145.45759

Signal 2: DAD1 B, Sig=254,16 Ref=off

| Peak # | RetTime [min] | Type | Width [min] | Area [mAU*s] | Height [mAU] | Area % |
|--------|---------------|------|-------------|--------------|--------------|--------|
| 1      | 16.434        | BV   | 0.1008      | 833.83966    | 123.42804    | 2.6899 |
| 2      | 16.799        | VB   | 0.1030      | 826.67096    | 122.01691    | 2.6668 |

Sample Name: TG-1-77

| Peak #   | RetTime [min] | Type | Width [min] | Area [mAU*s] | Height [mAU] | Area %  |
|----------|---------------|------|-------------|--------------|--------------|---------|
| 3        | 17.886        | BV   | 0.1638      | 2.93381e4    | 2905.61011   | 94.6433 |
| Totals : |               |      |             | 3.09986e4    | 3151.05506   |         |

Signal 3: DAD1 D, Sig=230,16 Ref=off

| Peak #   | RetTime [min] | Type | Width [min] | Area [mAU*s] | Height [mAU] | Area %  |
|----------|---------------|------|-------------|--------------|--------------|---------|
| 1        | 16.434        | BV   | 0.0987      | 1284.22107   | 195.25409    | 3.5227  |
| 2        | 16.799        | VB   | 0.1065      | 1051.25366   | 148.74681    | 2.8837  |
| 3        | 17.885        | BV   | 0.1846      | 3.41199e4    | 3002.46069   | 93.5936 |
| Totals : |               |      |             | 3.64554e4    | 3346.46159   |         |

Signal 4: DAD1 E, Sig=280,16 Ref=off

| Peak #   | RetTime [min] | Type | Width [min] | Area [mAU*s] | Height [mAU] | Area %  |
|----------|---------------|------|-------------|--------------|--------------|---------|
| 1        | 16.434        | BV   | 0.1028      | 309.91739    | 44.74255     | 1.3397  |
| 2        | 16.800        | VB   | 0.1064      | 410.00235    | 58.08295     | 1.7723  |
| 3        | 17.886        | BV   | 0.1366      | 2.24138e4    | 2651.25903   | 96.8880 |
| Totals : |               |      |             | 2.31337e4    | 2754.08453   |         |

Signal 5: DAD1 F, Sig=280,16 Ref=off

| Peak #   | RetTime [min] | Type | Width [min] | Area [mAU*s] | Height [mAU] | Area %  |
|----------|---------------|------|-------------|--------------|--------------|---------|
| 1        | 16.434        | BV   | 0.1028      | 309.91739    | 44.74255     | 1.3397  |
| 2        | 16.800        | VB   | 0.1064      | 410.00235    | 58.08295     | 1.7723  |
| 3        | 17.886        | BV   | 0.1366      | 2.24138e4    | 2651.25903   | 96.8880 |
| Totals : |               |      |             | 2.31337e4    | 2754.08453   |         |

Sample Name: TG-1-77

Signal 6: DAD1 G, Sig=300,16 Ref=off

| Peak # | RetTime [min] | Type | Width [min] | Area [mAU*s] | Height [mAU] | Area %  |
|--------|---------------|------|-------------|--------------|--------------|---------|
| 1      | 16.435        | VV   | 0.1028      | 98.29136     | 14.19804     | 0.8305  |
| 2      | 16.800        | VB   | 0.1115      | 128.30803    | 17.11167     | 1.0841  |
| 3      | 17.885        | BV   | 0.1162      | 1.16091e4    | 1572.00085   | 98.0855 |

Totals : 1.18357e4 1603.31057

=====  
\*\*\* End of Report \*\*\*

**S172**

# HRMS for compound 64

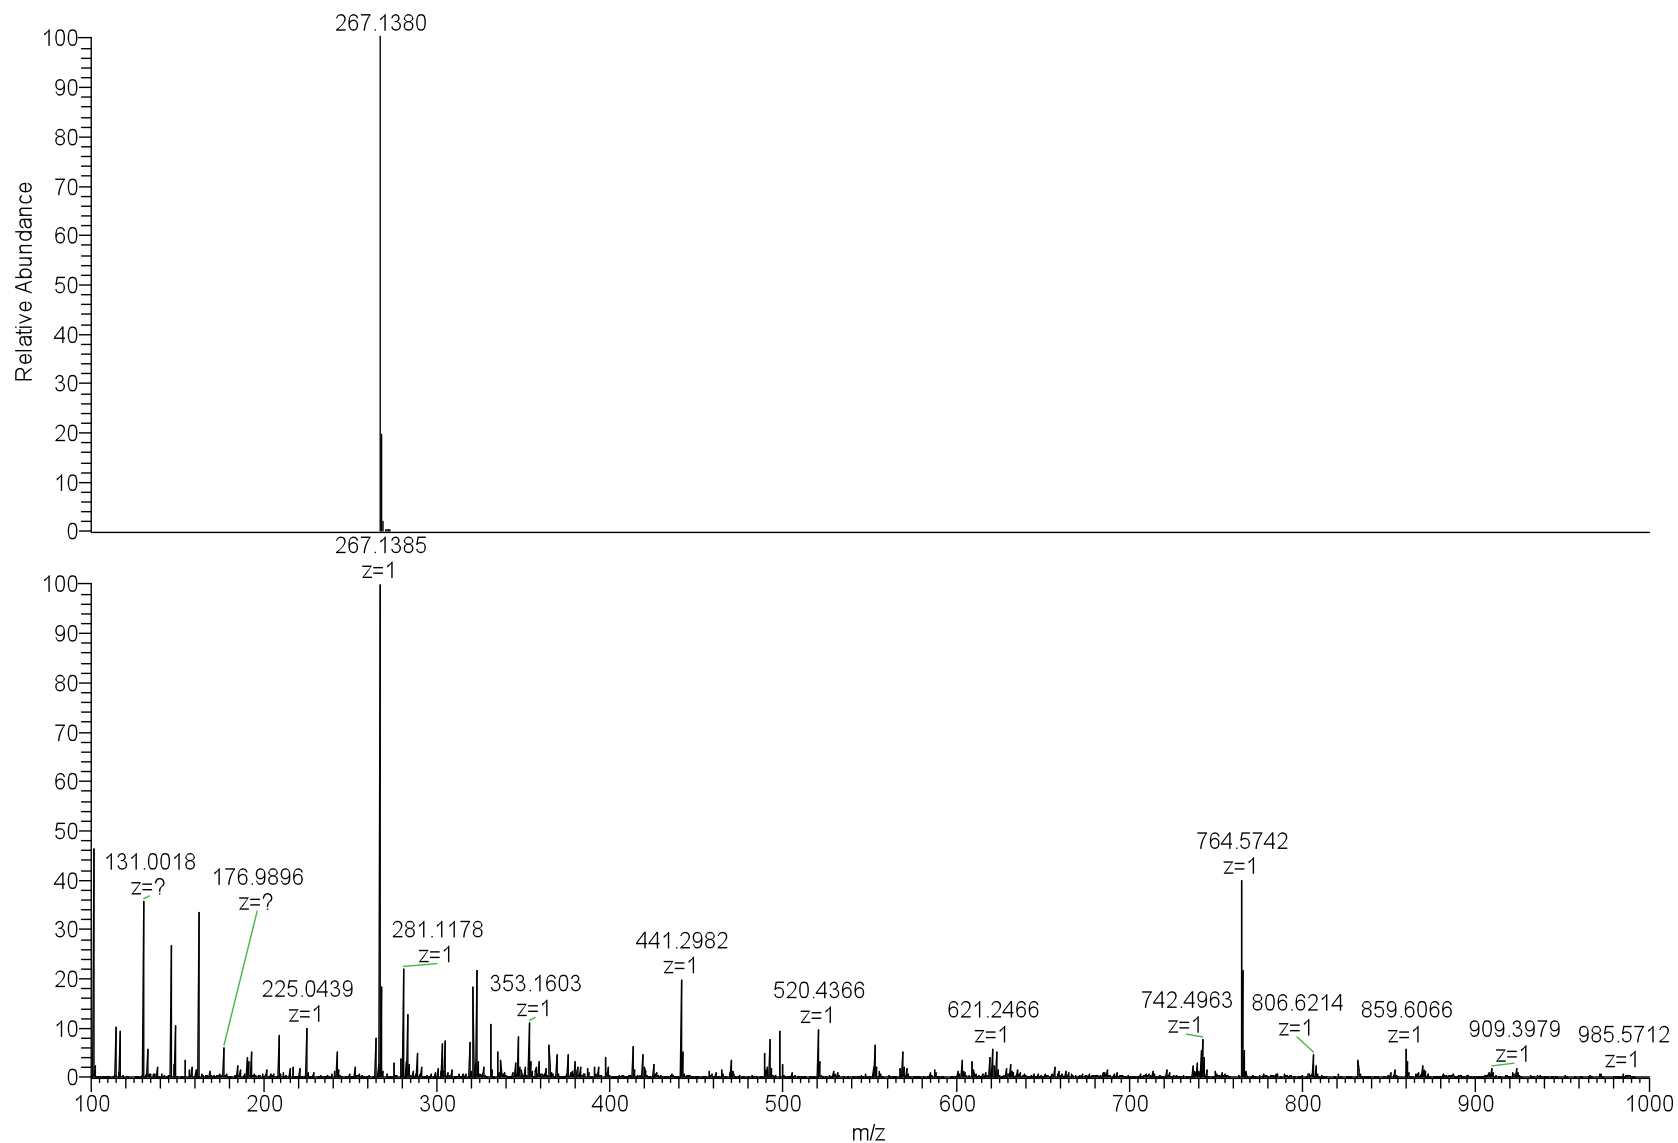

NL:  
8.18E5  
C<sub>18</sub>H<sub>19</sub>O<sub>2</sub>  
C<sub>18</sub>H<sub>19</sub>O<sub>2</sub>  
pa Chrg 1

NL:  
5.91E7  
TG\_1\_77\_ESI\_+  
Orbi#1 RT: 0.00  
AV: 1 T: FTMS + p  
ESI Full ms  
[100.00-1000.00]

**S173**

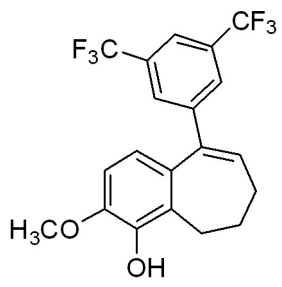

**65**

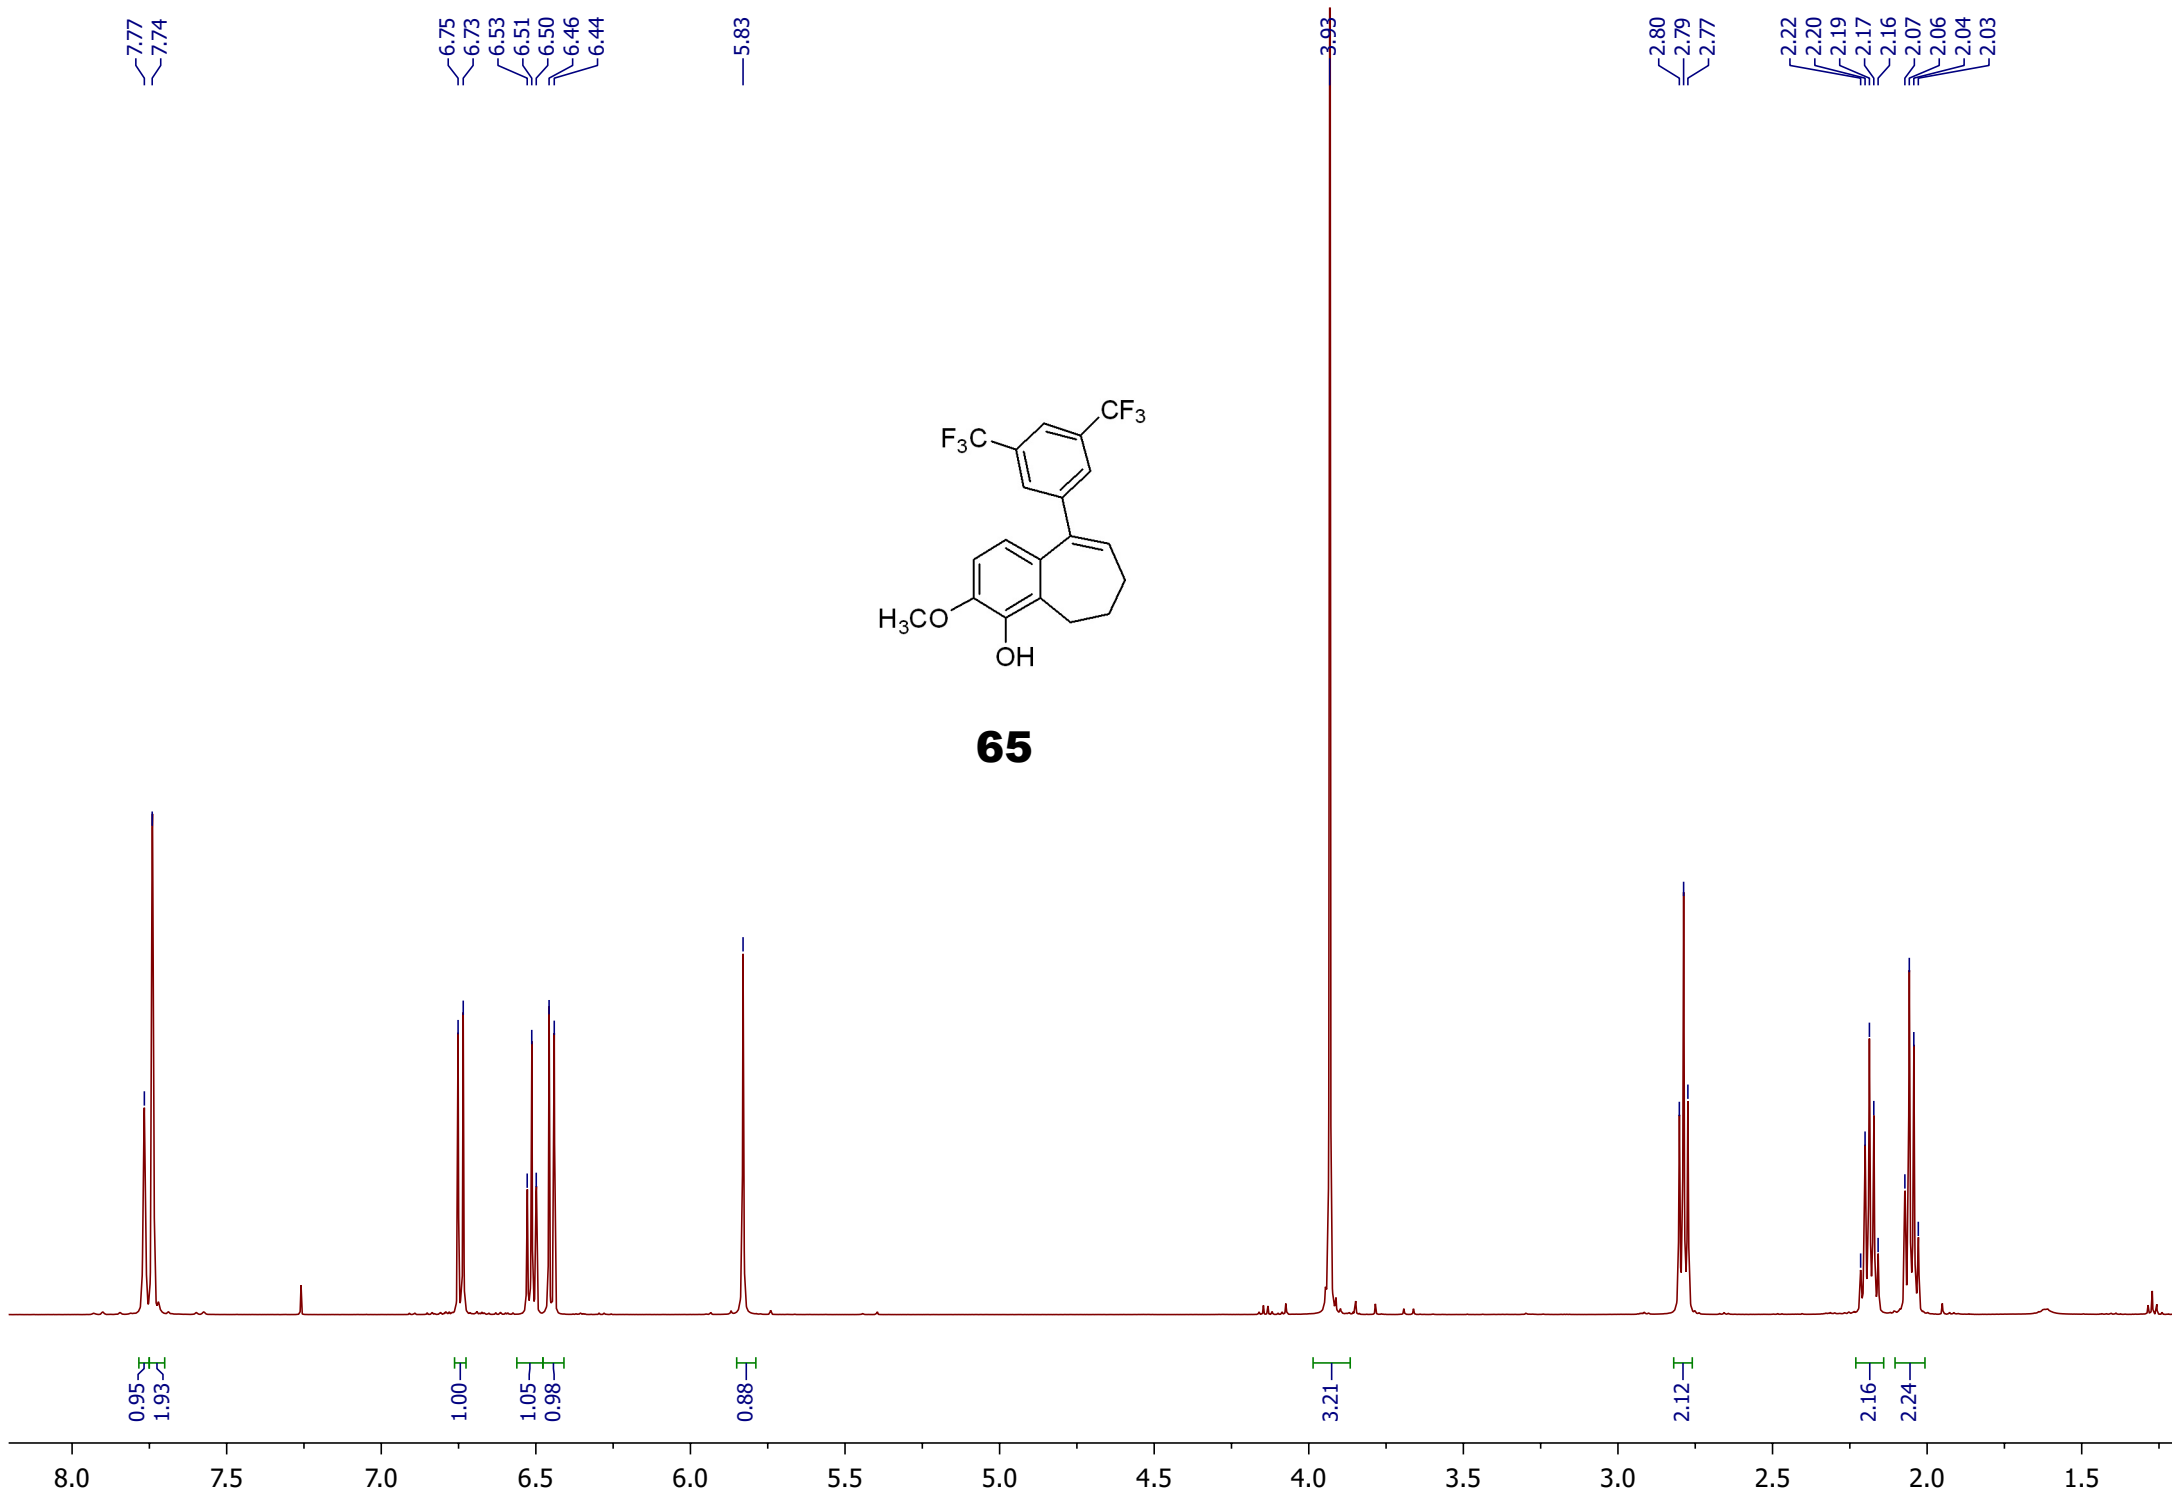

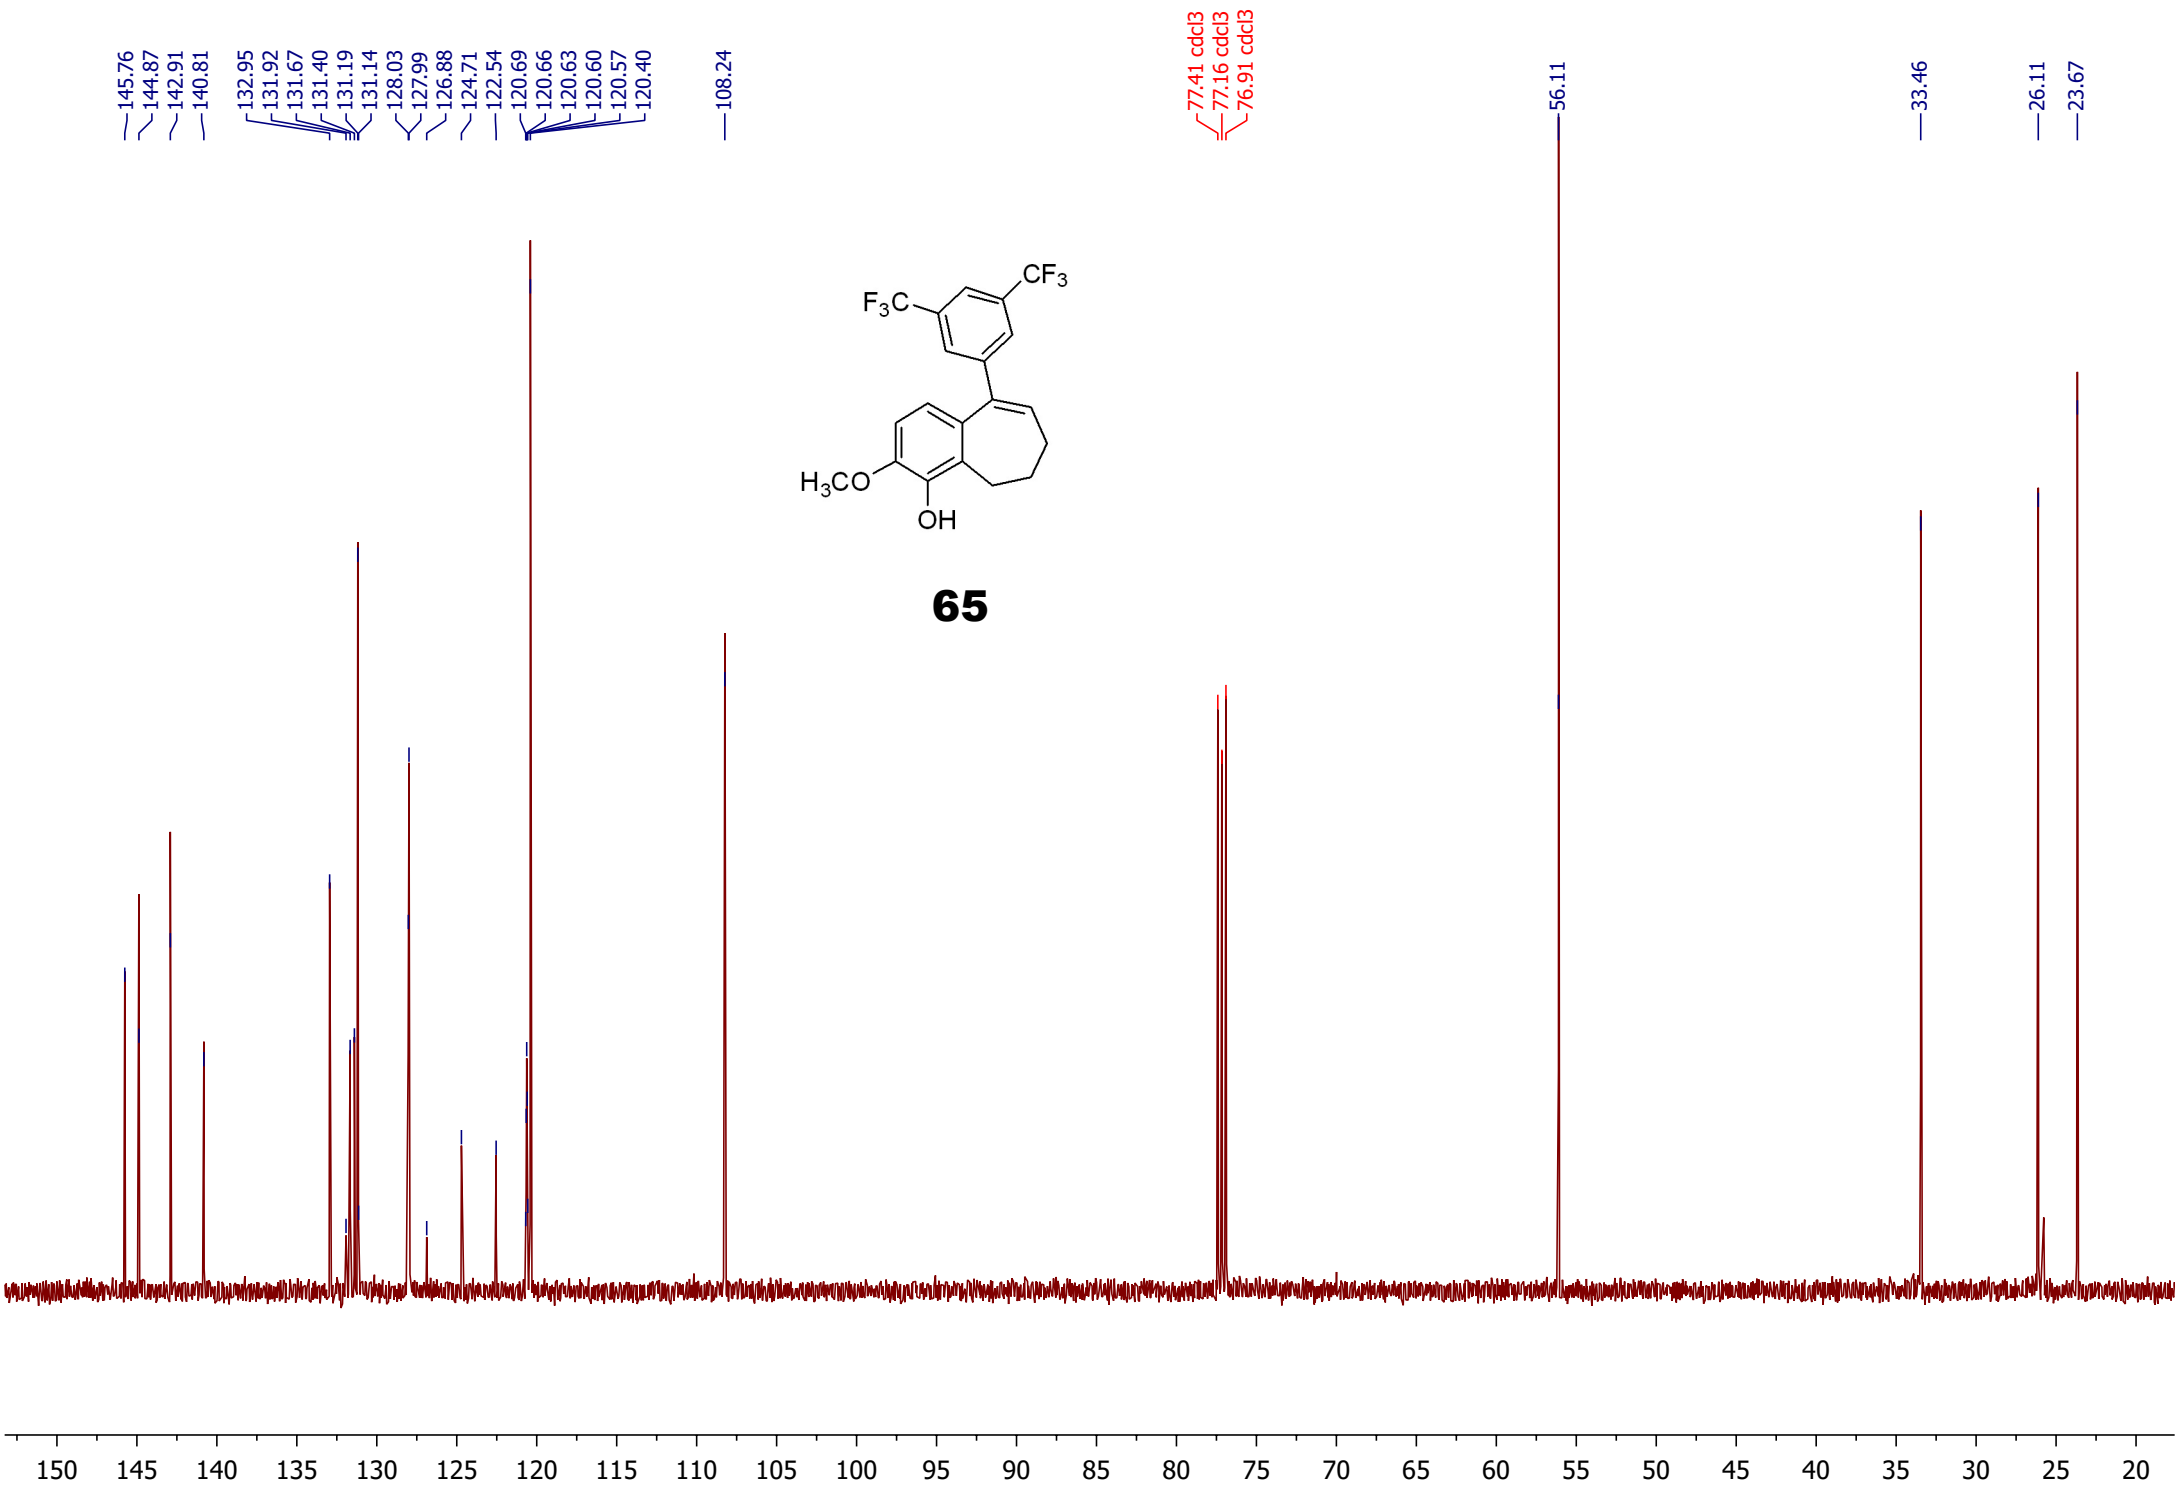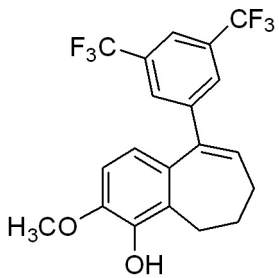

**65**

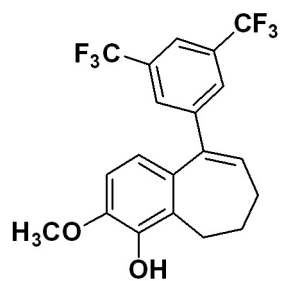

**65**

62.80

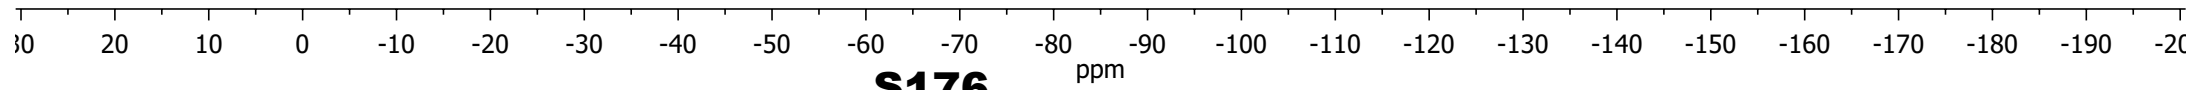

**S176**



Sample Name: CML\_III\_095\_r1

**HPLC for compound 65**

```

=====
Acq. Operator   : Eric Lin
Acq. Instrument : Instrument 1                Location : -
Injection Date  : 3/11/2014 2:51:58 PM
Acq. Method    : C:\CHEM32\1\METHODS\MASTERMETHOD.M
Last changed   : 3/11/2014 2:48:52 PM by Eric Lin
Analysis Method: C:\CHEM32\1\DATA\ERIC LIN\CML_III_095_R16.D\DA.M (MASTERMETHOD.M)
Last changed   : 3/11/2014 3:54:40 PM by Eric Lin
Sample Info    : wash
  
```

## Method:

```

0-25 min. (50:50 to 100:0) ACN:Water
25-30 min. (100:0) ACN:Water
30-35 min. (100:0 to 50:50) ACN:Water
35-40 min. (50:50) ACN:Water
  
```

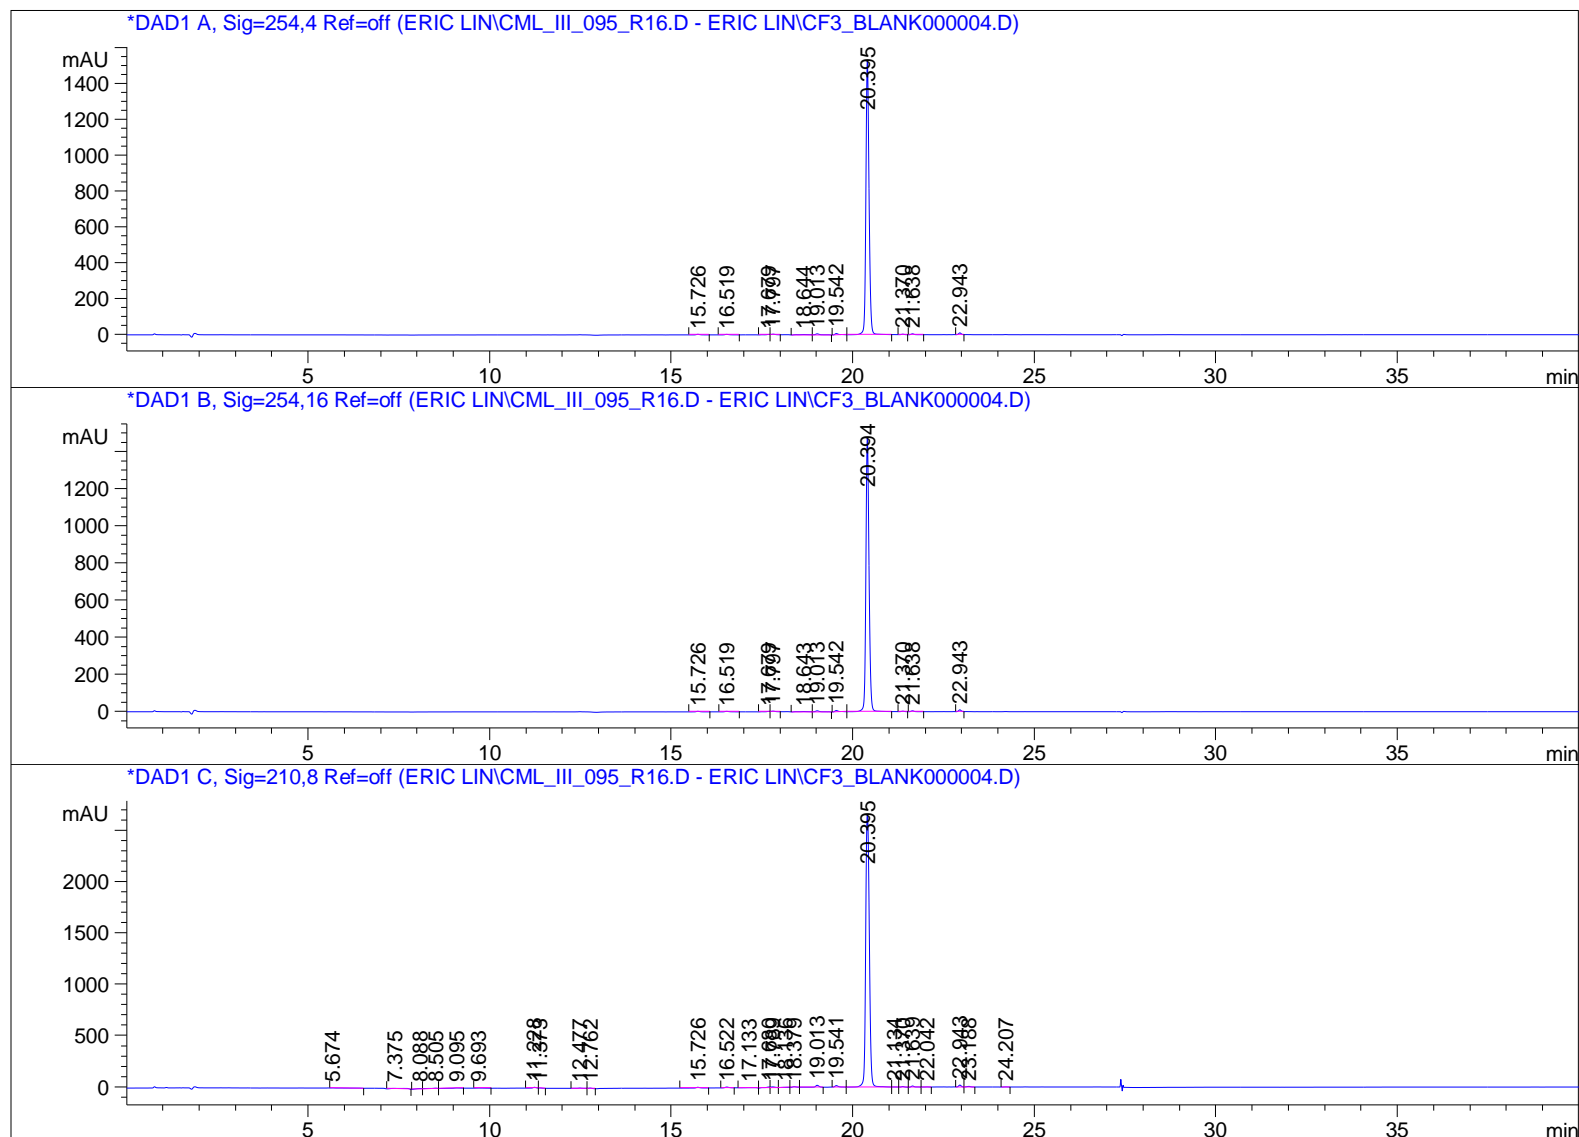

Sample Name: CML\_III\_095\_r1

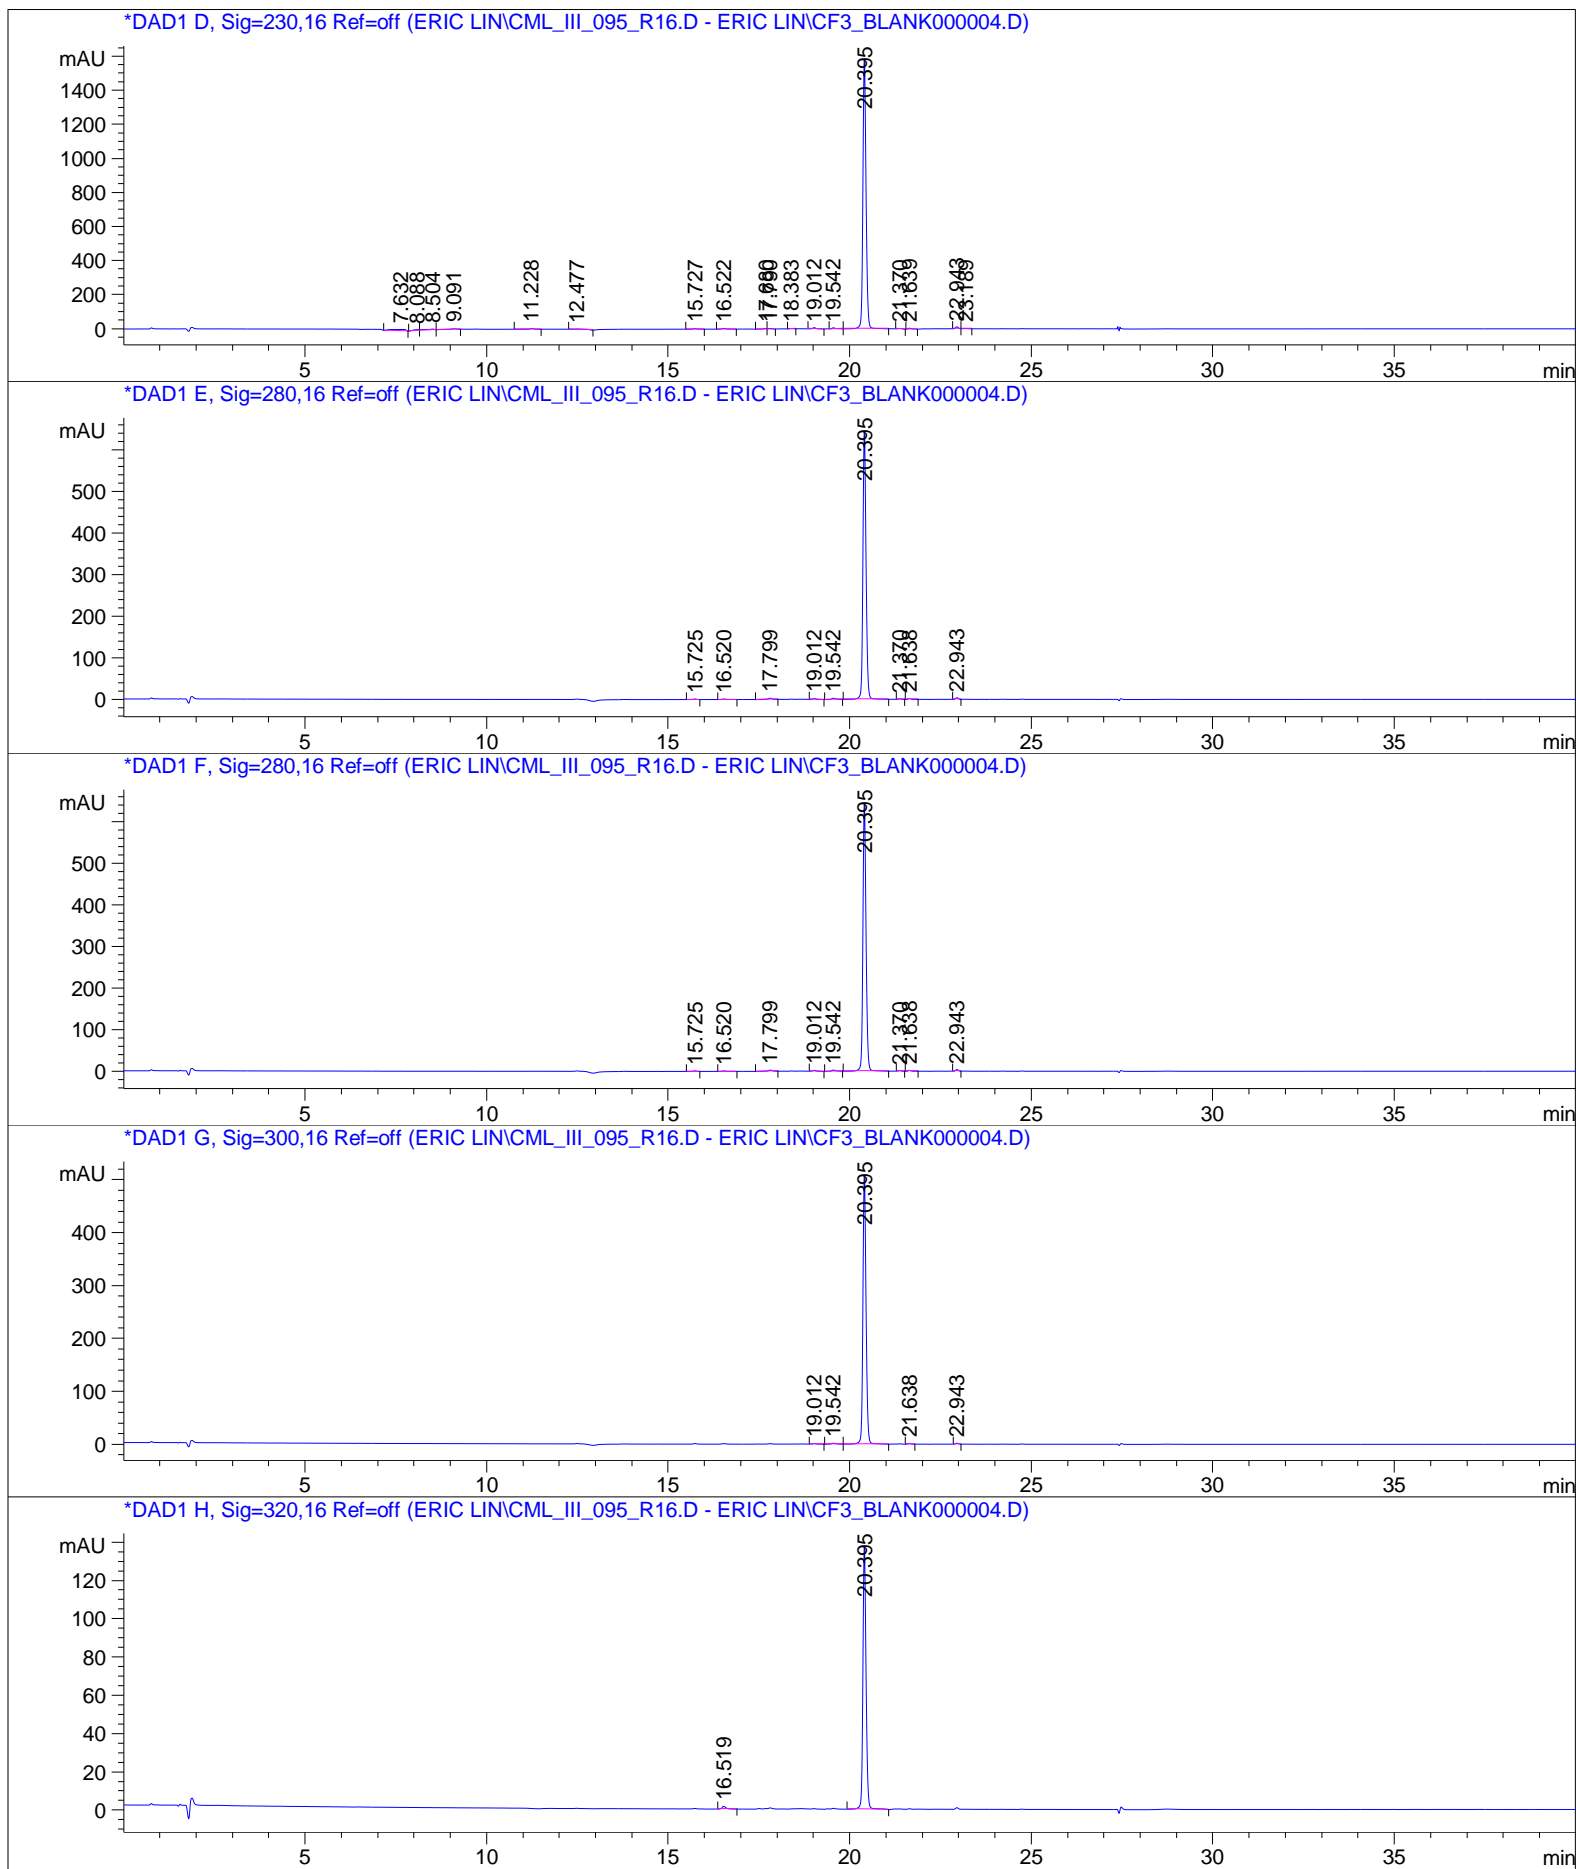

Sample Name: CML\_III\_095\_r1

```

=====
                          Area Percent Report
=====

```

```

Sorted By      :      Signal
Multiplier     :      1.0000
Dilution      :      1.0000
Use Multiplier & Dilution Factor with ISTDs

```

Signal 1: DAD1 A, Sig=254,4 Ref=off

Signal has been modified after loading from rawdata file!

| Peak # | RetTime [min] | Type | Width [min] | Area [mAU*s] | Height [mAU] | Area %  |
|--------|---------------|------|-------------|--------------|--------------|---------|
| 1      | 15.726        | BB   | 0.0982      | 20.13693     | 3.08261      | 0.2106  |
| 2      | 16.519        | BB   | 0.1184      | 21.30018     | 2.68834      | 0.2227  |
| 3      | 17.679        | BV   | 0.1106      | 17.70028     | 2.27860      | 0.1851  |
| 4      | 17.797        | VB   | 0.1132      | 25.49945     | 3.33327      | 0.2667  |
| 5      | 18.644        | BV   | 0.3221      | 61.30715     | 2.46542      | 0.6411  |
| 6      | 19.013        | VB   | 0.1513      | 70.46623     | 6.35964      | 0.7369  |
| 7      | 19.542        | BB   | 0.1120      | 57.89999     | 7.50579      | 0.6055  |
| 8      | 20.395        | BB   | 0.0922      | 9198.03418   | 1528.99988   | 96.1876 |
| 9      | 21.370        | BB   | 0.0791      | 13.52444     | 2.66984      | 0.1414  |
| 10     | 21.638        | BB   | 0.0835      | 26.06196     | 4.78922      | 0.2725  |
| 11     | 22.943        | VV   | 0.0783      | 50.66928     | 10.13774     | 0.5299  |

```
Totals :                      9562.60008 1574.31034
```

Signal 2: DAD1 B, Sig=254,16 Ref=off

Signal has been modified after loading from rawdata file!

| Peak # | RetTime [min] | Type | Width [min] | Area [mAU*s] | Height [mAU] | Area %  |
|--------|---------------|------|-------------|--------------|--------------|---------|
| 1      | 15.726        | BB   | 0.0983      | 19.38648     | 2.96598      | 0.2103  |
| 2      | 16.519        | BB   | 0.1190      | 20.82996     | 2.61210      | 0.2260  |
| 3      | 17.679        | BV   | 0.1112      | 17.47881     | 2.23609      | 0.1896  |
| 4      | 17.797        | VB   | 0.1132      | 25.27899     | 3.30642      | 0.2742  |
| 5      | 18.643        | BV   | 0.3208      | 56.03249     | 2.24808      | 0.6078  |
| 6      | 19.013        | VB   | 0.1471      | 65.22282     | 6.08367      | 0.7075  |
| 7      | 19.542        | BB   | 0.1113      | 54.82693     | 7.16507      | 0.5947  |
| 8      | 20.394        | BB   | 0.0921      | 8872.07324   | 1475.70349   | 96.2390 |
| 9      | 21.370        | BB   | 0.0791      | 12.99658     | 2.56620      | 0.1410  |
| 10     | 21.638        | BB   | 0.0836      | 25.24567     | 4.63317      | 0.2739  |
| 11     | 22.943        | VV   | 0.0783      | 49.41745     | 9.88459      | 0.5361  |

```
Totals :                      9218.78941 1519.40486
```

Sample Name: CML\_III\_095\_r1

Signal 3: DAD1 C, Sig=210,8 Ref=off

Signal has been modified after loading from rawdata file!

| Peak # | RetTime [min] | Type | Width [min] | Area [mAU*s] | Height [mAU] | Area %  |
|--------|---------------|------|-------------|--------------|--------------|---------|
| 1      | 5.674         | VB   | 0.3926      | 44.06831     | 1.38739      | 0.2177  |
| 2      | 7.375         | BB   | 0.4786      | 214.54793    | 5.86683      | 1.0599  |
| 3      | 8.088         | BV   | 0.1815      | 70.84110     | 6.00896      | 0.3500  |
| 4      | 8.505         | VV   | 0.2886      | 131.47398    | 5.84208      | 0.6495  |
| 5      | 9.095         | VB   | 0.3278      | 81.57391     | 3.28358      | 0.4030  |
| 6      | 9.693         | BB   | 0.2099      | 17.39349     | 1.11562      | 0.0859  |
| 7      | 11.228        | BV   | 0.1006      | 57.96552     | 8.60018      | 0.2864  |
| 8      | 11.373        | VB   | 0.0894      | 14.11614     | 2.37216      | 0.0697  |
| 9      | 12.477        | BV   | 0.1629      | 46.31915     | 3.78189      | 0.2288  |
| 10     | 12.762        | VB   | 0.1005      | 34.67432     | 5.15360      | 0.1713  |
| 11     | 15.726        | BB   | 0.1044      | 51.22066     | 7.24781      | 0.2530  |
| 12     | 16.522        | BB   | 0.1089      | 55.50475     | 7.80679      | 0.2742  |
| 13     | 17.133        | BB   | 0.2957      | 60.25353     | 2.56871      | 0.2977  |
| 14     | 17.680        | BV   | 0.1381      | 80.84849     | 7.85592      | 0.3994  |
| 15     | 17.789        | VV   | 0.1288      | 75.16172     | 8.37082      | 0.3713  |
| 16     | 18.136        | VB   | 0.2330      | 26.68663     | 1.61339      | 0.1318  |
| 17     | 18.379        | BV   | 0.1083      | 47.17024     | 6.52840      | 0.2330  |
| 18     | 19.013        | VB   | 0.1081      | 139.61841    | 18.91397     | 0.6897  |
| 19     | 19.541        | VB   | 0.0978      | 95.36326     | 14.67350     | 0.4711  |
| 20     | 20.395        | BV   | 0.1118      | 1.86236e4    | 2657.28906   | 92.0020 |
| 21     | 21.134        | VV   | 0.1510      | 20.76570     | 2.03656      | 0.1026  |
| 22     | 21.370        | VB   | 0.0898      | 37.02381     | 6.19101      | 0.1829  |
| 23     | 21.639        | BB   | 0.0880      | 63.57571     | 10.91086     | 0.3141  |
| 24     | 22.042        | BB   | 0.1008      | 7.01408      | 1.01333      | 0.0347  |
| 25     | 22.943        | VV   | 0.0789      | 94.95434     | 18.80930     | 0.4691  |
| 26     | 23.188        | VB   | 0.1056      | 43.21199     | 6.03252      | 0.2135  |
| 27     | 24.207        | BB   | 0.1019      | 7.66240      | 1.17747      | 0.0379  |

Totals : 2.02426e4 2822.45171

Signal 4: DAD1 D, Sig=230,16 Ref=off

Signal has been modified after loading from rawdata file!

| Peak # | RetTime [min] | Type | Width [min] | Area [mAU*s] | Height [mAU] | Area % |
|--------|---------------|------|-------------|--------------|--------------|--------|
| 1      | 7.632         | BB   | 0.3457      | 244.82117    | 8.66334      | 2.3247 |
| 2      | 8.088         | BV   | 0.1865      | 83.24166     | 6.91353      | 0.7904 |
| 3      | 8.504         | VV   | 0.2903      | 155.94417    | 6.88412      | 1.4808 |
| 4      | 9.091         | VB   | 0.3319      | 95.37034     | 3.78608      | 0.9056 |
| 5      | 11.228        | BB   | 0.0986      | 26.37656     | 4.01844      | 0.2505 |
| 6      | 12.477        | BB   | 0.3337      | 77.63901     | 2.88735      | 0.7372 |
| 7      | 15.727        | BB   | 0.1022      | 20.69559     | 3.00905      | 0.1965 |
| 8      | 16.522        | BB   | 0.1230      | 29.73312     | 3.57454      | 0.2823 |

Sample Name: CML\_III\_095\_r1

| Peak # | RetTime [min] | Type | Width [min] | Area [mAU*s] | Height [mAU] | Area %  |
|--------|---------------|------|-------------|--------------|--------------|---------|
| 9      | 17.680        | BV   | 0.1323      | 34.43248     | 3.57857      | 0.3270  |
| 10     | 17.790        | VB   | 0.1142      | 25.67534     | 3.39784      | 0.2438  |
| 11     | 18.383        | BB   | 0.1008      | 12.53002     | 1.95390      | 0.1190  |
| 12     | 19.012        | BB   | 0.0930      | 42.09318     | 6.91282      | 0.3997  |
| 13     | 19.542        | VB   | 0.1016      | 41.41371     | 6.06741      | 0.3932  |
| 14     | 20.395        | BB   | 0.0922      | 9513.58496   | 1581.17224   | 90.3374 |
| 15     | 21.370        | BB   | 0.0906      | 17.37347     | 2.87103      | 0.1650  |
| 16     | 21.639        | BB   | 0.1049      | 40.14706     | 5.51546      | 0.3812  |
| 17     | 22.943        | VV   | 0.0787      | 58.11080     | 11.55836     | 0.5518  |
| 18     | 23.189        | VB   | 0.1223      | 11.98790     | 1.39506      | 0.1138  |

Totals : 1.05312e4 1664.15915

Signal 5: DAD1 E, Sig=280,16 Ref=off

Signal has been modified after loading from rawdata file!

| Peak # | RetTime [min] | Type | Width [min] | Area [mAU*s] | Height [mAU] | Area %  |
|--------|---------------|------|-------------|--------------|--------------|---------|
| 1      | 15.725        | BB   | 0.0922      | 7.46464      | 1.24071      | 0.1873  |
| 2      | 16.520        | BB   | 0.1243      | 9.99923      | 1.18650      | 0.2509  |
| 3      | 17.799        | BB   | 0.1403      | 28.14871     | 2.87234      | 0.7064  |
| 4      | 19.012        | BB   | 0.1053      | 13.62076     | 1.90712      | 0.3418  |
| 5      | 19.542        | BB   | 0.1191      | 24.31960     | 2.92321      | 0.6103  |
| 6      | 20.395        | BB   | 0.0920      | 3864.91748   | 643.91962    | 96.9896 |
| 7      | 21.370        | BB   | 0.0796      | 5.79338      | 1.13348      | 0.1454  |
| 8      | 21.638        | BB   | 0.0838      | 11.43022     | 2.08863      | 0.2868  |
| 9      | 22.943        | VB   | 0.0768      | 19.18251     | 3.93981      | 0.4814  |

Totals : 3984.87653 661.21142

Signal 6: DAD1 F, Sig=280,16 Ref=off

Signal has been modified after loading from rawdata file!

| Peak # | RetTime [min] | Type | Width [min] | Area [mAU*s] | Height [mAU] | Area %  |
|--------|---------------|------|-------------|--------------|--------------|---------|
| 1      | 15.725        | BB   | 0.0922      | 7.46464      | 1.24071      | 0.1873  |
| 2      | 16.520        | BB   | 0.1243      | 9.99923      | 1.18650      | 0.2509  |
| 3      | 17.799        | BB   | 0.1403      | 28.14871     | 2.87234      | 0.7064  |
| 4      | 19.012        | BB   | 0.1053      | 13.62076     | 1.90712      | 0.3418  |
| 5      | 19.542        | BB   | 0.1191      | 24.31960     | 2.92321      | 0.6103  |
| 6      | 20.395        | BB   | 0.0920      | 3864.91748   | 643.91962    | 96.9896 |
| 7      | 21.370        | BB   | 0.0796      | 5.79338      | 1.13348      | 0.1454  |
| 8      | 21.638        | BB   | 0.0838      | 11.43022     | 2.08863      | 0.2868  |
| 9      | 22.943        | VB   | 0.0768      | 19.18251     | 3.93981      | 0.4814  |

Sample Name: CML\_III\_095\_r1

| Peak #                                    | RetTime [min] | Type | Width [min] | Area [mAU*s] | Height [mAU] | Area % |
|-------------------------------------------|---------------|------|-------------|--------------|--------------|--------|
| ----- ----- ----- ----- ----- ----- ----- |               |      |             |              |              |        |
| Totals :                                  |               |      |             | 3984.87653   | 661.21142    |        |

Signal 7: DAD1 G, Sig=300,16 Ref=off

Signal has been modified after loading from rawdata file!

| Peak #                                    | RetTime [min] | Type | Width [min] | Area [mAU*s] | Height [mAU] | Area %  |
|-------------------------------------------|---------------|------|-------------|--------------|--------------|---------|
| ----- ----- ----- ----- ----- ----- ----- |               |      |             |              |              |         |
| 1                                         | 19.012        | BB   | 0.1139      | 8.24947      | 1.04762      | 0.2664  |
| 2                                         | 19.542        | BB   | 0.1270      | 16.53314     | 1.83632      | 0.5339  |
| 3                                         | 20.395        | BB   | 0.0921      | 3057.46191   | 508.62131    | 98.7265 |
| 4                                         | 21.638        | BB   | 0.0804      | 6.04191      | 1.16629      | 0.1951  |
| 5                                         | 22.943        | BB   | 0.0767      | 8.61605      | 1.77379      | 0.2782  |
| ----- ----- ----- ----- ----- ----- ----- |               |      |             |              |              |         |
| Totals :                                  |               |      |             | 3096.90248   | 514.44532    |         |

Signal 8: DAD1 H, Sig=320,16 Ref=off

Signal has been modified after loading from rawdata file!

| Peak #                                    | RetTime [min] | Type | Width [min] | Area [mAU*s] | Height [mAU] | Area %  |
|-------------------------------------------|---------------|------|-------------|--------------|--------------|---------|
| ----- ----- ----- ----- ----- ----- ----- |               |      |             |              |              |         |
| 1                                         | 16.519        | BB   | 0.1121      | 10.13603     | 1.37369      | 1.2035  |
| 2                                         | 20.395        | BB   | 0.0928      | 832.06708    | 137.10928    | 98.7965 |
| ----- ----- ----- ----- ----- ----- ----- |               |      |             |              |              |         |
| Totals :                                  |               |      |             | 842.20311    | 138.48297    |         |

=====  
\*\*\* End of Report \*\*\*

# HRMS for compound 65

C:\Xcalibur\...\CML\_III\_095\_Orbi\_-ESI

3/17/2014 2:52:06 PM

CML\_III\_095

CML\_III\_095\_Orbi\_-ESI #13 RT: 0.10 AV: 1 NL:  
T: FTMS - p ESI Full ms [100.00-500.00]

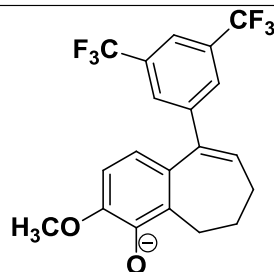

Chemical Formula:  $C_{20}H_{15}F_6O_2^-$

Exact Mass: 401.0982

m/z: 401.0981 (100.0%), 402.1015 (21.6%), 403.1048 (2.2%)

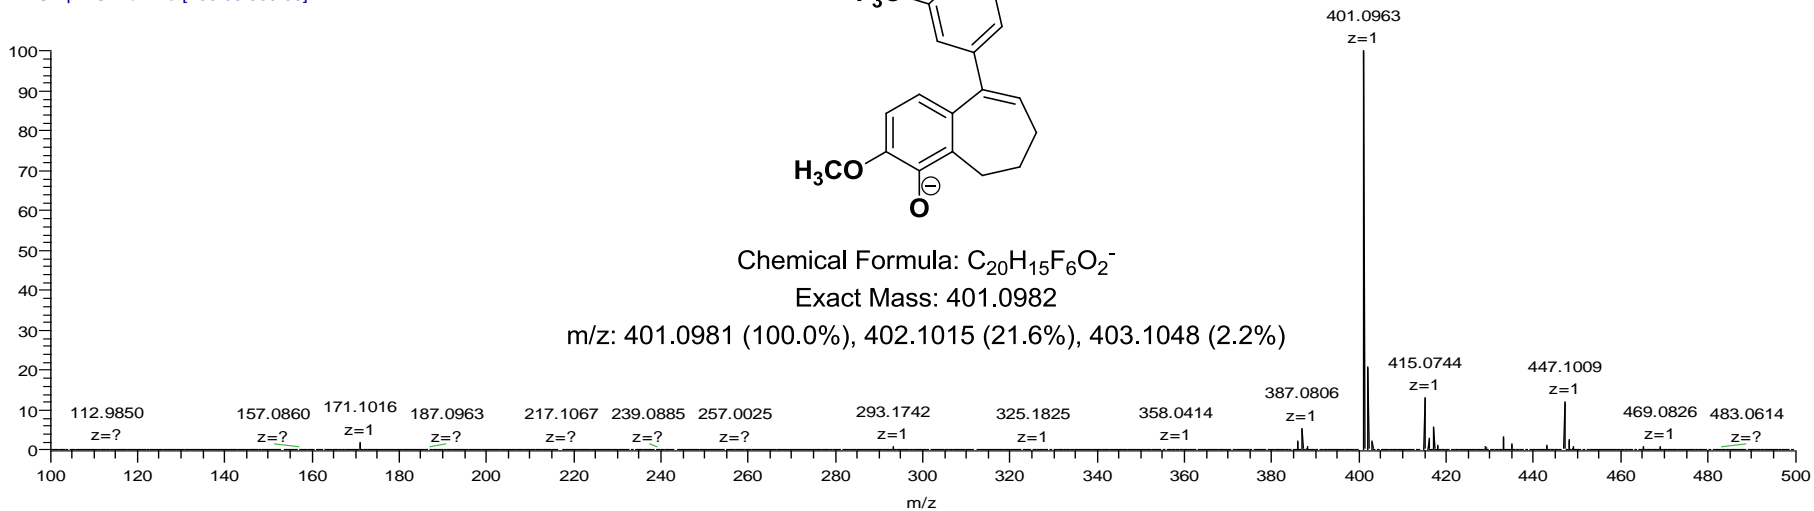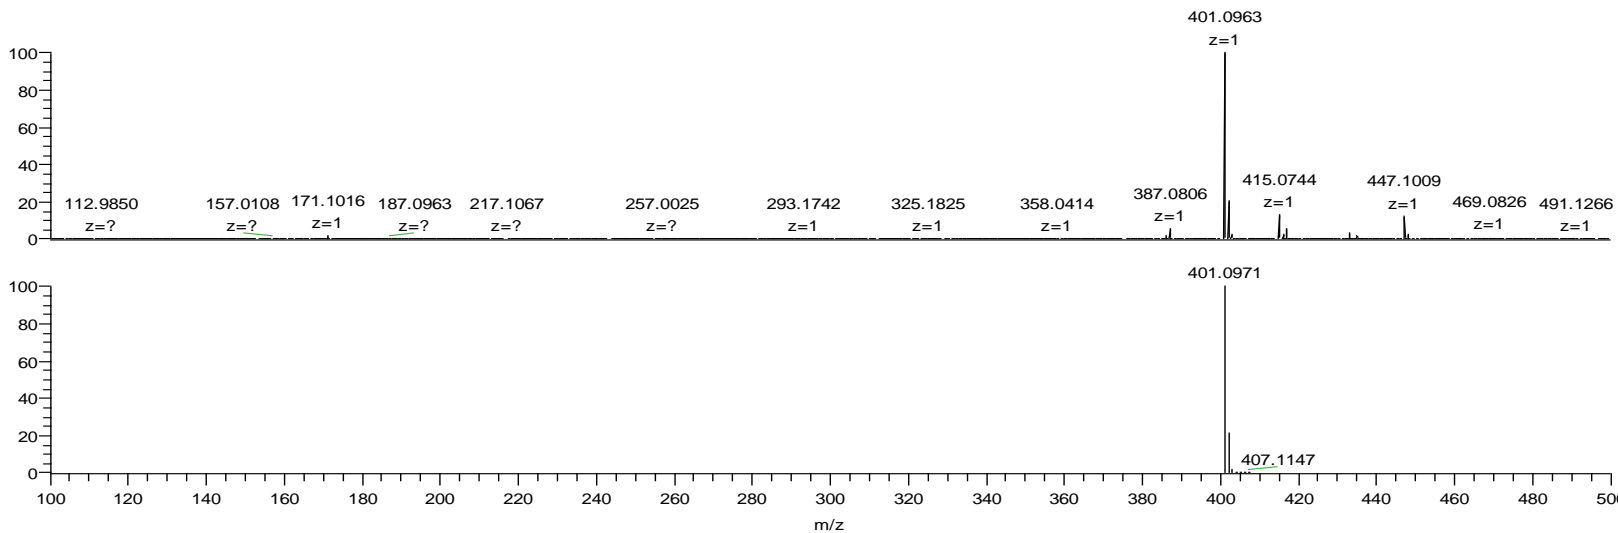

NL:  
1.27E9  
CML\_III\_095\_Orbi\_-  
ESI#13 RT: 0.10  
AV: 1 T: FTMS - p  
ESI Full ms  
[100.00-500.00]

NL:  
8.01E5  
 $C_{20}H_{15}F_6O_2^-$   
 $C_{20}H_{15}F_6O_2^-$   
pa Chrg 1

**S183**

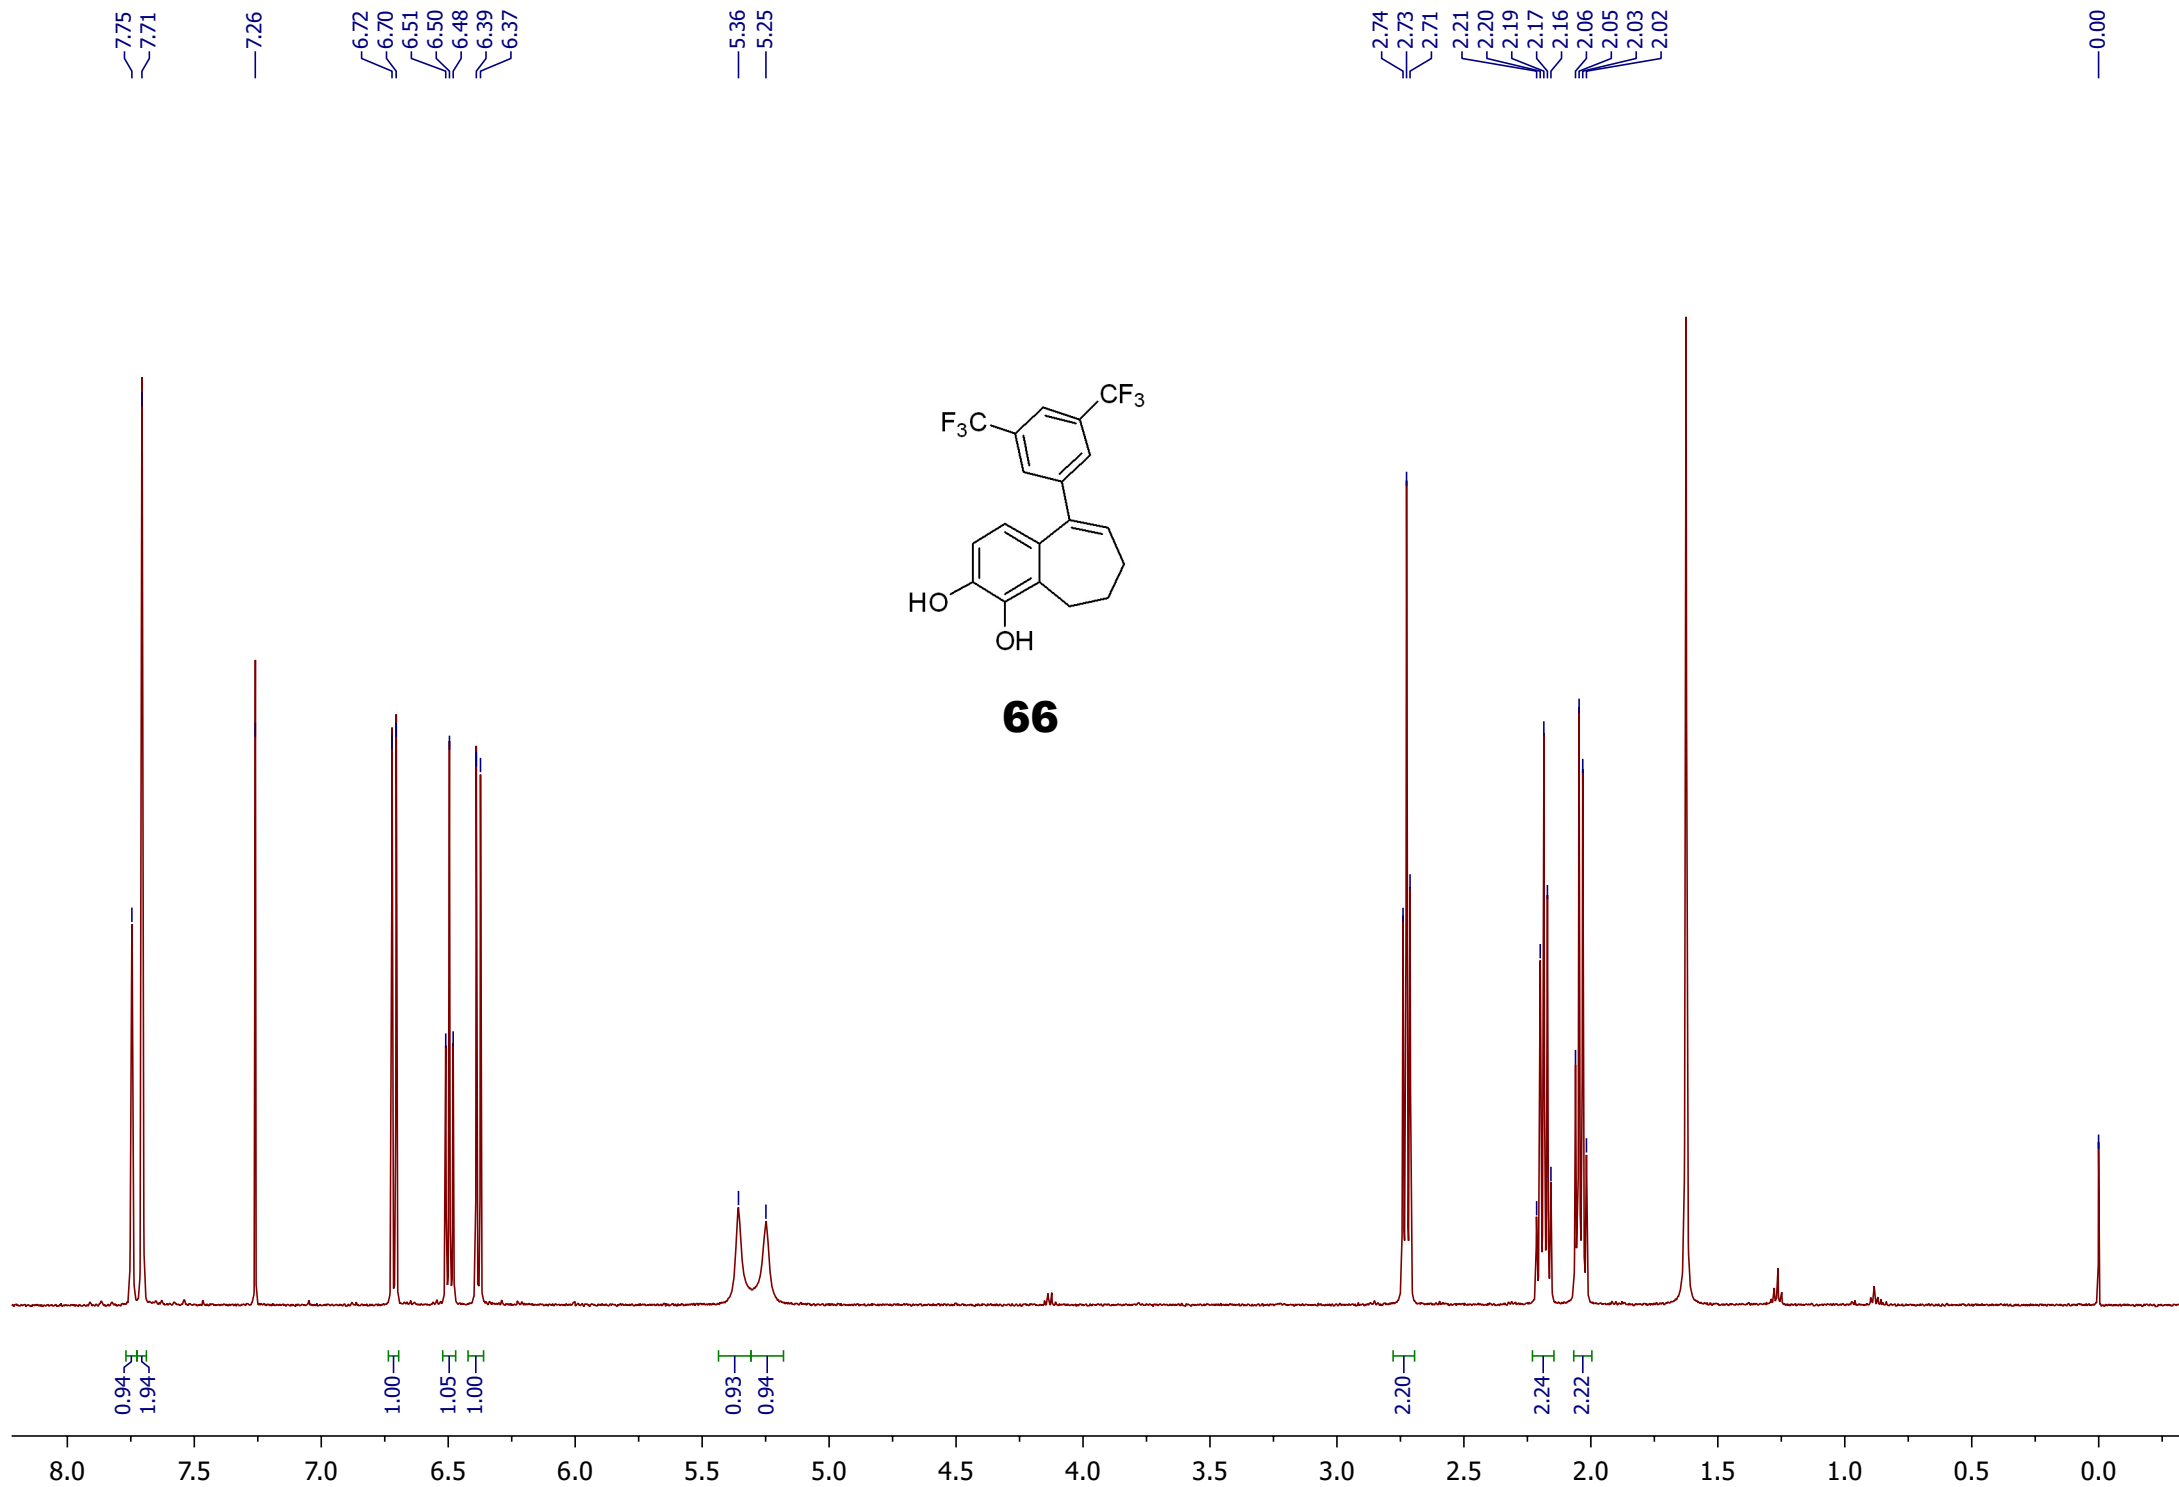



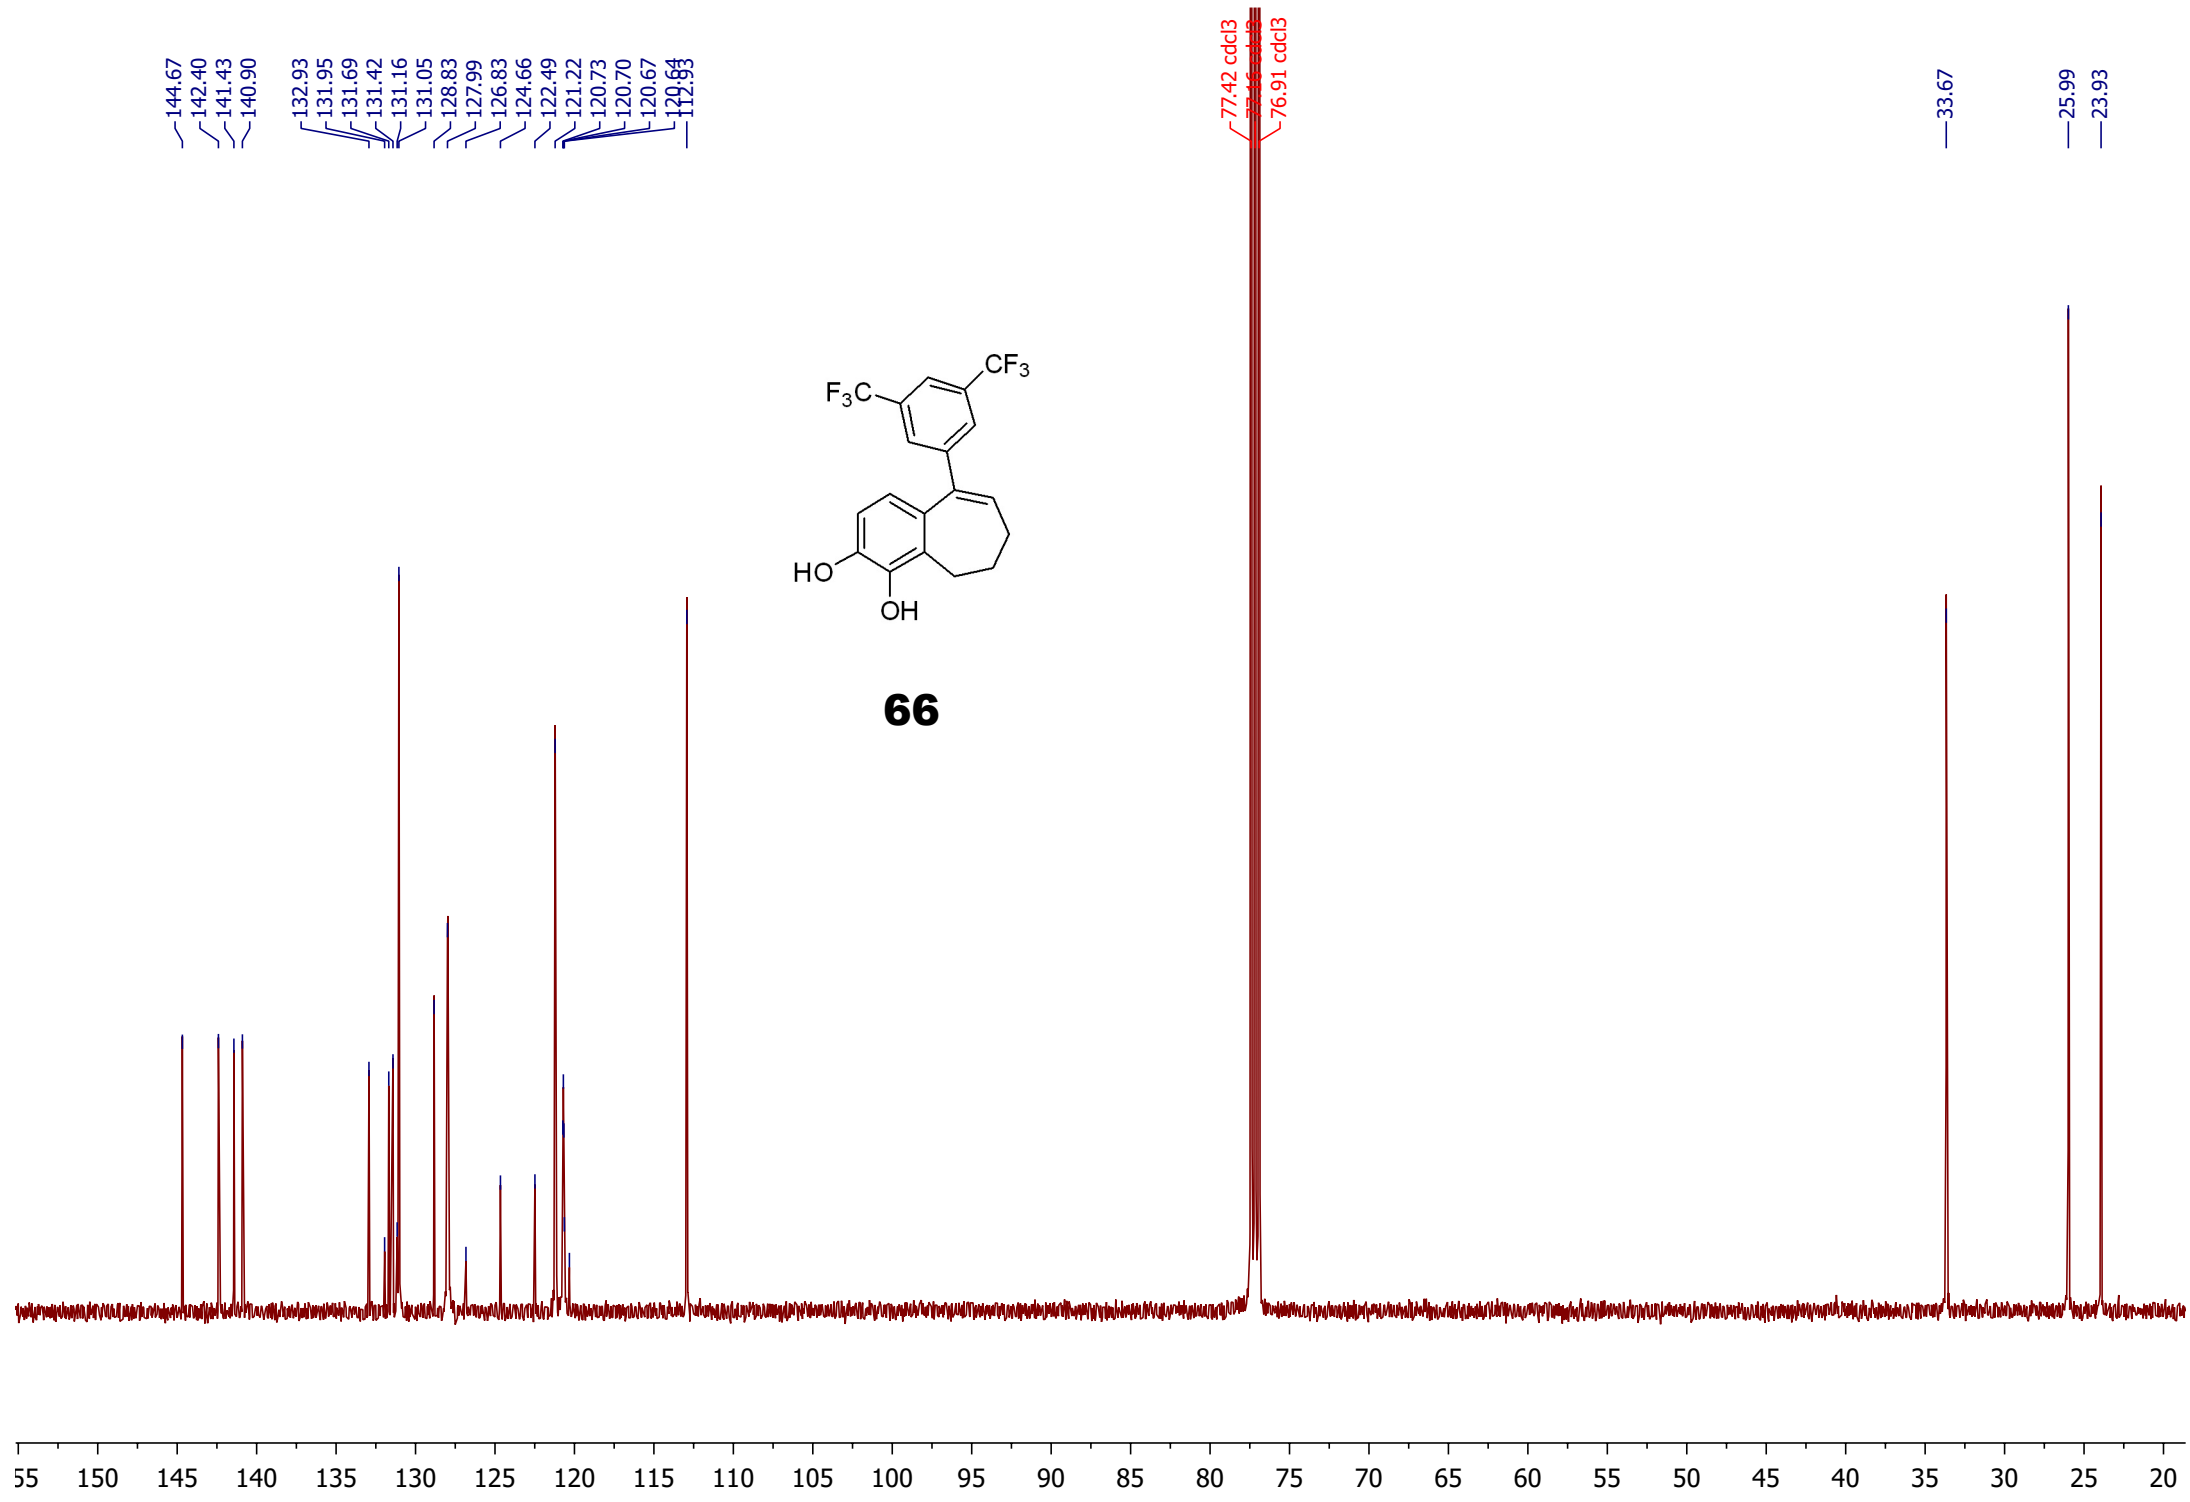

144.67  
142.40  
141.43  
140.90  
132.93  
131.95  
131.69  
131.42  
131.16  
131.05  
128.83  
127.99  
126.83  
124.66  
122.49  
121.22  
120.73  
120.70  
120.67  
119.64

77.42 cdcl3  
77.00 cdcl3  
76.91 cdcl3

33.67

25.99  
23.93

**S185**

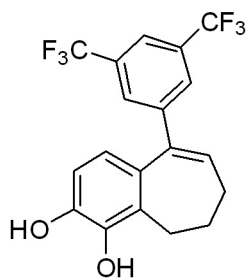

**66**

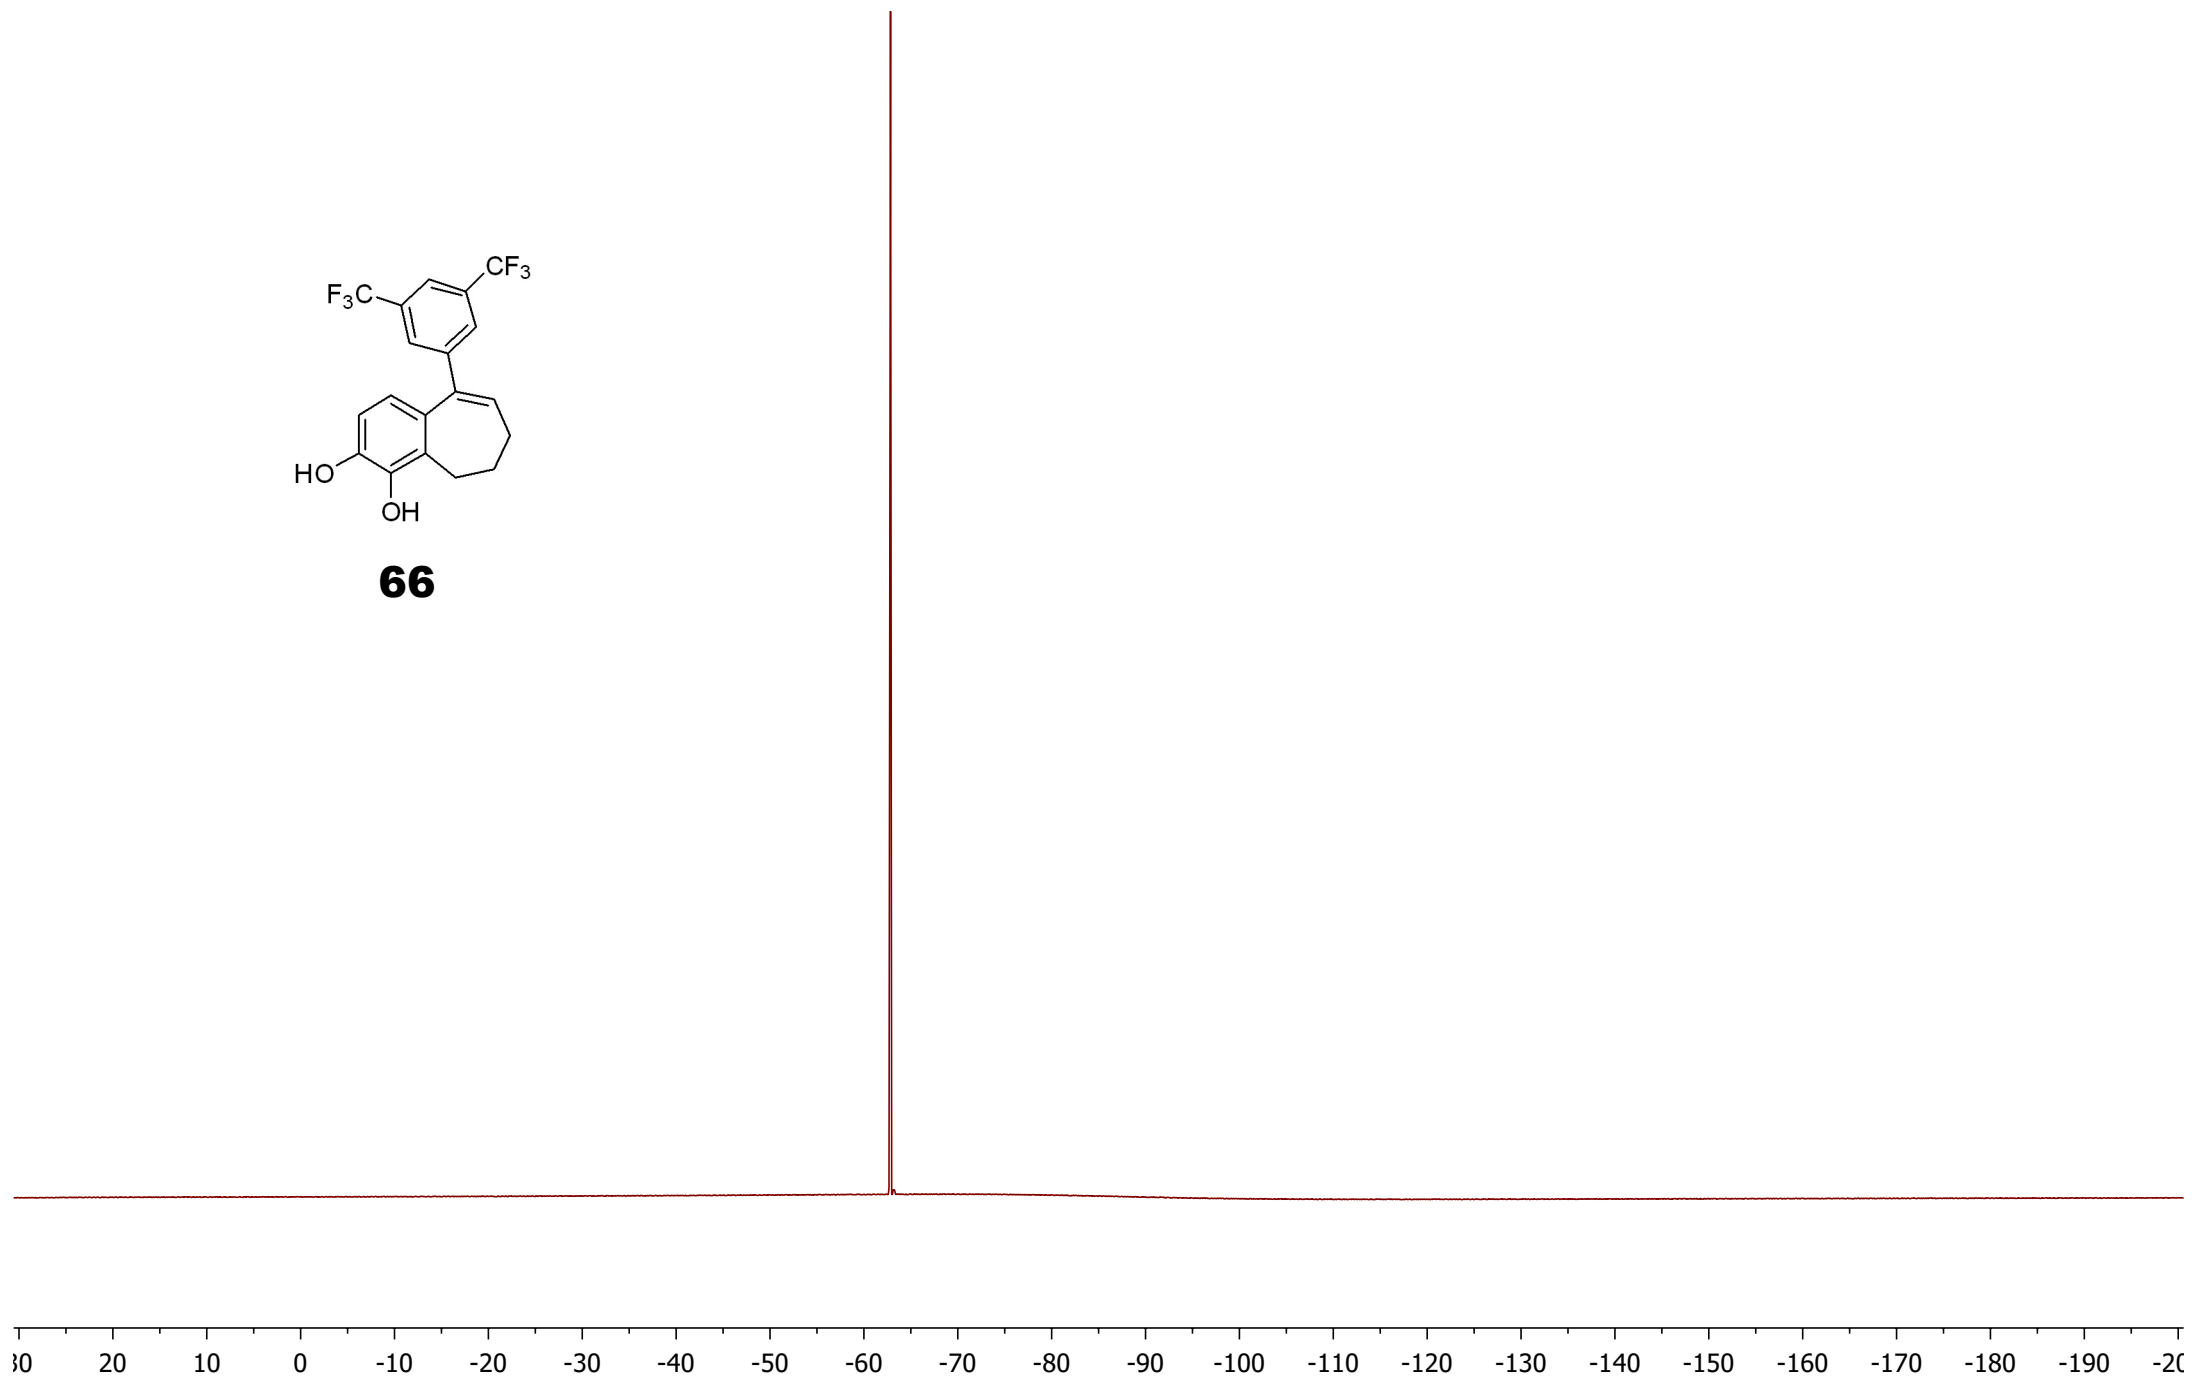

**S186**

**HPLC for compound 66**

=====  
Acq. Operator : Eric Lin  
Acq. Instrument : Instrument 1 Location : -  
Injection Date : 3/11/2014 3:54:22 PM  
Acq. Method : C:\CHEM32\1\METHODS\MASTERMETHOD.M  
Last changed : 3/11/2014 3:42:14 PM by Eric Lin  
Analysis Method : C:\CHEM32\1\DATA\ERIC LIN\CML\_III\_089\_R17.D\DA.M (MASTERMETHOD.M)  
Last changed : 3/11/2014 4:44:37 PM by Eric Lin  
Sample Info : wash

## Method:

0-25 min. (50:50 to 100:0) ACN:Water  
25-30 min. (100:0) ACN:Water  
30-35 min. (100:0 to 50:50) ACN:Water  
35-40 min. (50:50) ACN:Water

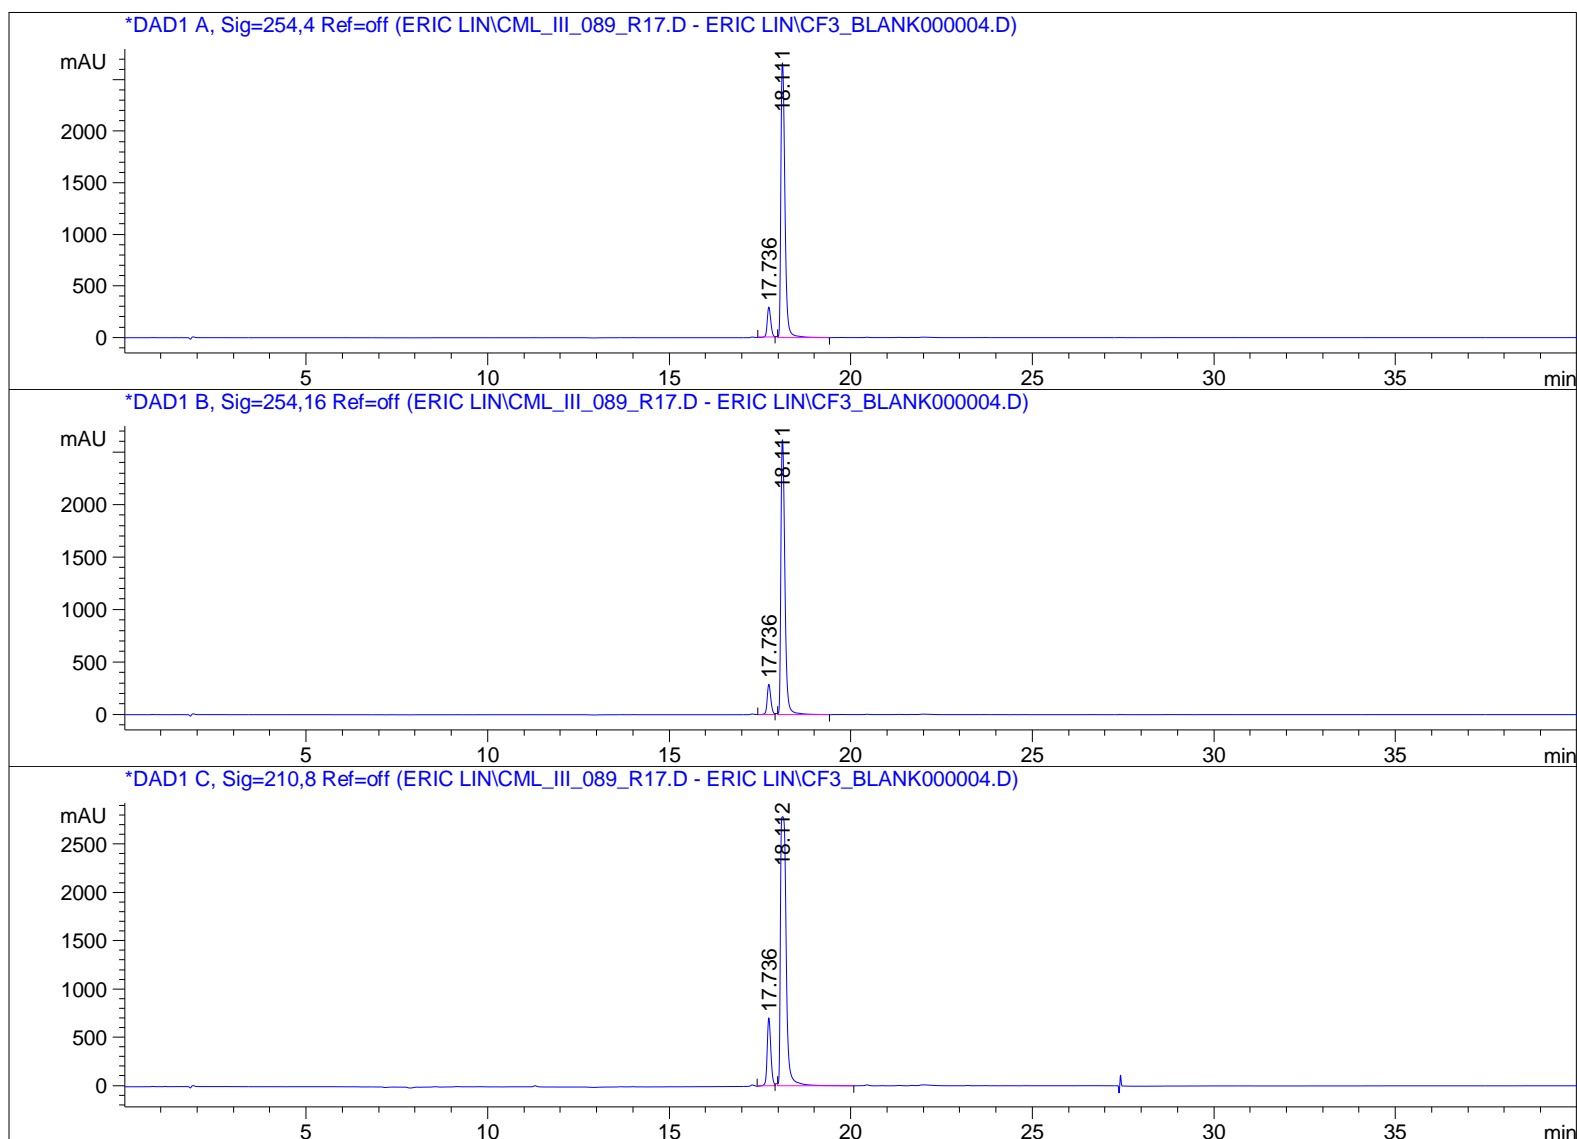

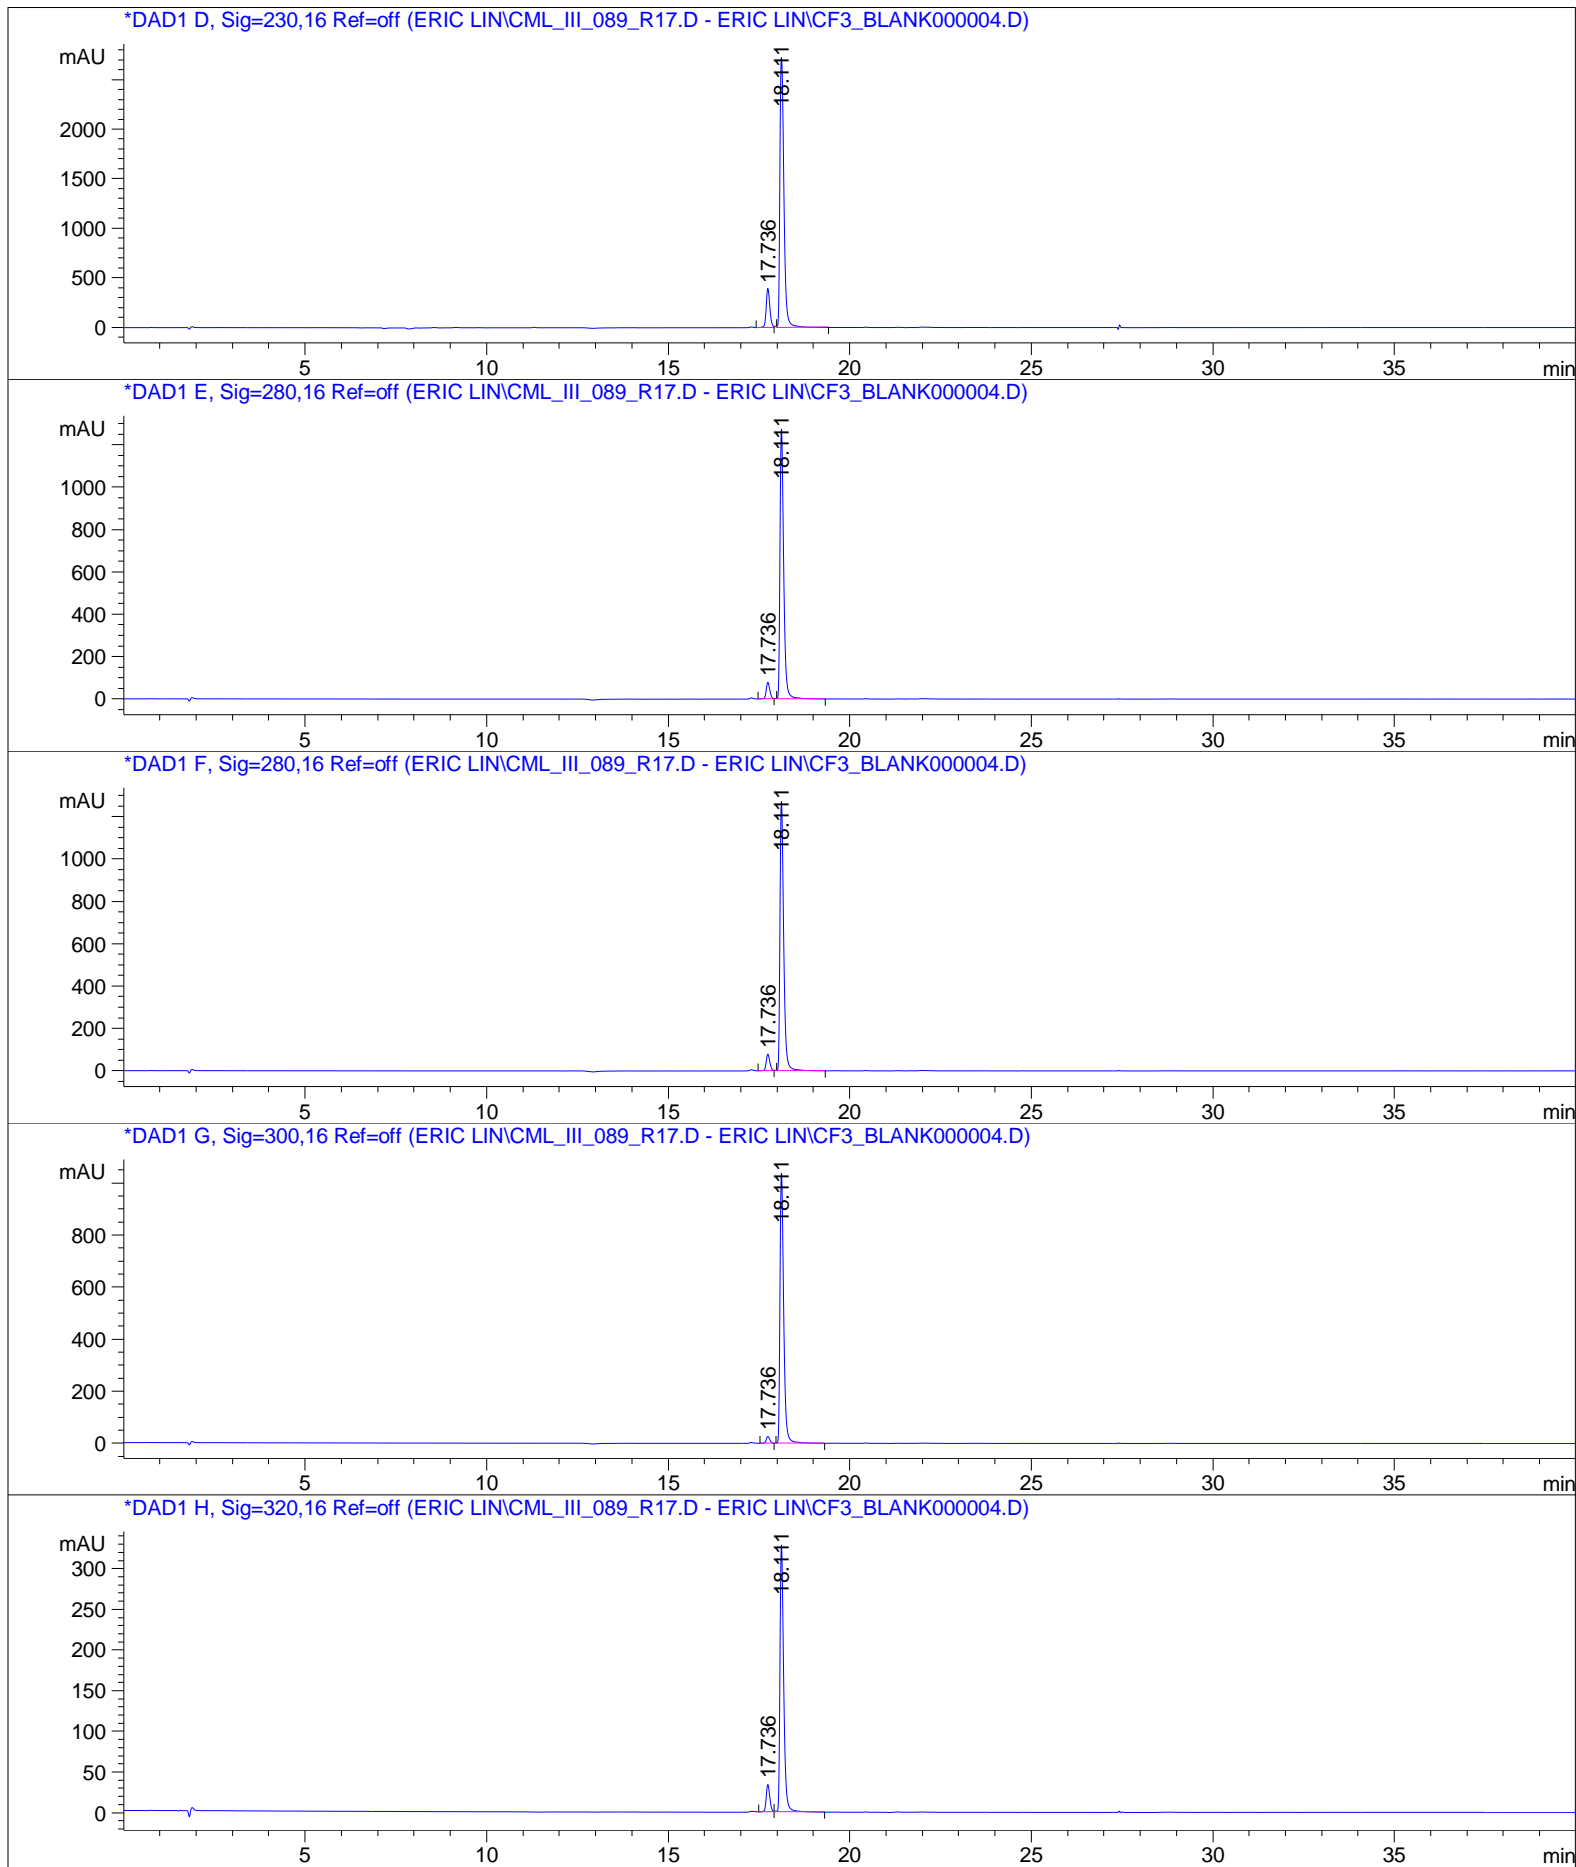

Sample Name: CML\_III\_089\_r1

```

=====
                          Area Percent Report
=====

```

```

Sorted By      :      Signal
Multiplier     :      1.0000
Dilution      :      1.0000
Use Multiplier & Dilution Factor with ISTDs

```

Signal 1: DAD1 A, Sig=254,4 Ref=off

Signal has been modified after loading from rawdata file!

| Peak # | RetTime [min] | Type | Width [min] | Area [mAU*s] | Height [mAU] | Area %  |
|--------|---------------|------|-------------|--------------|--------------|---------|
| 1      | 17.736        | BV   | 0.1074      | 2060.98120   | 295.51819    | 9.0361  |
| 2      | 18.111        | VB   | 0.1228      | 2.07474e4    | 2666.64331   | 90.9639 |

```
Totals :                2.28084e4  2962.16150
```

Signal 2: DAD1 B, Sig=254,16 Ref=off

Signal has been modified after loading from rawdata file!

| Peak # | RetTime [min] | Type | Width [min] | Area [mAU*s] | Height [mAU] | Area %  |
|--------|---------------|------|-------------|--------------|--------------|---------|
| 1      | 17.736        | BV   | 0.1074      | 2008.27014   | 287.96533    | 9.0541  |
| 2      | 18.111        | VB   | 0.1198      | 2.01725e4    | 2620.97852   | 90.9459 |

```
Totals :                2.21808e4  2908.94385
```

Signal 3: DAD1 C, Sig=210,8 Ref=off

Signal has been modified after loading from rawdata file!

| Peak # | RetTime [min] | Type | Width [min] | Area [mAU*s] | Height [mAU] | Area %  |
|--------|---------------|------|-------------|--------------|--------------|---------|
| 1      | 17.736        | BV   | 0.1083      | 4991.49316   | 707.71631    | 13.9556 |
| 2      | 18.112        | VB   | 0.1746      | 3.07754e4    | 2790.98706   | 86.0444 |

```
Totals :                3.57669e4  3498.70337
```

**S189**

Sample Name: CML\_III\_089\_r1

Signal 4: DAD1 D, Sig=230,16 Ref=off

Signal has been modified after loading from rawdata file!

| Peak # | RetTime [min] | Type | Width [min] | Area [mAU*s] | Height [mAU] | Area %  |
|--------|---------------|------|-------------|--------------|--------------|---------|
| 1      | 17.736        | BV   | 0.1078      | 2763.69995   | 394.30969    | 11.6487 |
| 2      | 18.111        | VB   | 0.1197      | 2.09617e4    | 2726.13794   | 88.3513 |

Totals : 2.37254e4 3120.44763

Signal 5: DAD1 E, Sig=280,16 Ref=off

Signal has been modified after loading from rawdata file!

| Peak # | RetTime [min] | Type | Width [min] | Area [mAU*s] | Height [mAU] | Area %  |
|--------|---------------|------|-------------|--------------|--------------|---------|
| 1      | 17.736        | BV   | 0.1070      | 546.02472    | 78.59853     | 5.7074  |
| 2      | 18.111        | VB   | 0.1085      | 9020.88184   | 1274.97351   | 94.2926 |

Totals : 9566.90656 1353.57204

Signal 6: DAD1 F, Sig=280,16 Ref=off

Signal has been modified after loading from rawdata file!

| Peak # | RetTime [min] | Type | Width [min] | Area [mAU*s] | Height [mAU] | Area %  |
|--------|---------------|------|-------------|--------------|--------------|---------|
| 1      | 17.736        | BV   | 0.1070      | 546.02472    | 78.59853     | 5.7074  |
| 2      | 18.111        | VB   | 0.1085      | 9020.88184   | 1274.97351   | 94.2926 |

Totals : 9566.90656 1353.57204

Signal 7: DAD1 G, Sig=300,16 Ref=off

Signal has been modified after loading from rawdata file!

| Peak # | RetTime [min] | Type | Width [min] | Area [mAU*s] | Height [mAU] | Area %  |
|--------|---------------|------|-------------|--------------|--------------|---------|
| 1      | 17.736        | BB   | 0.1042      | 170.52390    | 25.43328     | 2.2779  |
| 2      | 18.111        | BB   | 0.1082      | 7315.54199   | 1038.30994   | 97.7221 |

Totals : 7486.06589 1063.74322

**S190**

Sample Name: CML\_III\_089\_r1

Signal 8: DAD1 H, Sig=320,16 Ref=off

Signal has been modified after loading from rawdata file!

| Peak # | RetTime [min] | Type | Width [min] | Area [mAU*s] | Height [mAU] | Area %  |
|--------|---------------|------|-------------|--------------|--------------|---------|
| 1      | 17.736        | BV   | 0.1068      | 232.93462    | 33.65369     | 9.0931  |
| 2      | 18.111        | VB   | 0.1086      | 2328.72632   | 328.78772    | 90.9069 |

Totals : 2561.66093 362.44141

=====  
\*\*\* End of Report \*\*\*

**S191**

# HRMS for compound 66

C:\Xcalibur\...\CML\_III\_089\_Orbi\_-ESI

3/17/2014 2:37:16 PM

CML\_III\_089

CML\_III\_089\_Orbi\_-ESI #14 RT: 0.11 AV: 1 NL:  
T: FTMS - p ESI Full ms [200.00-600.00]

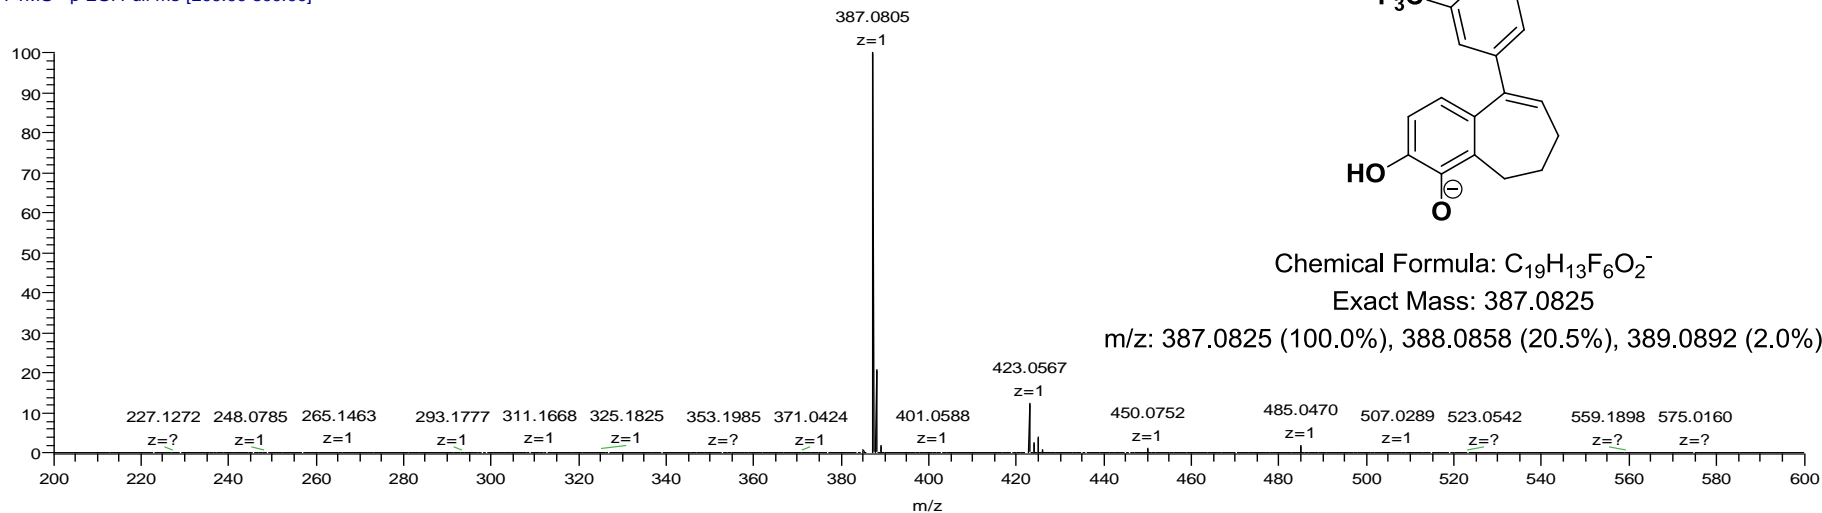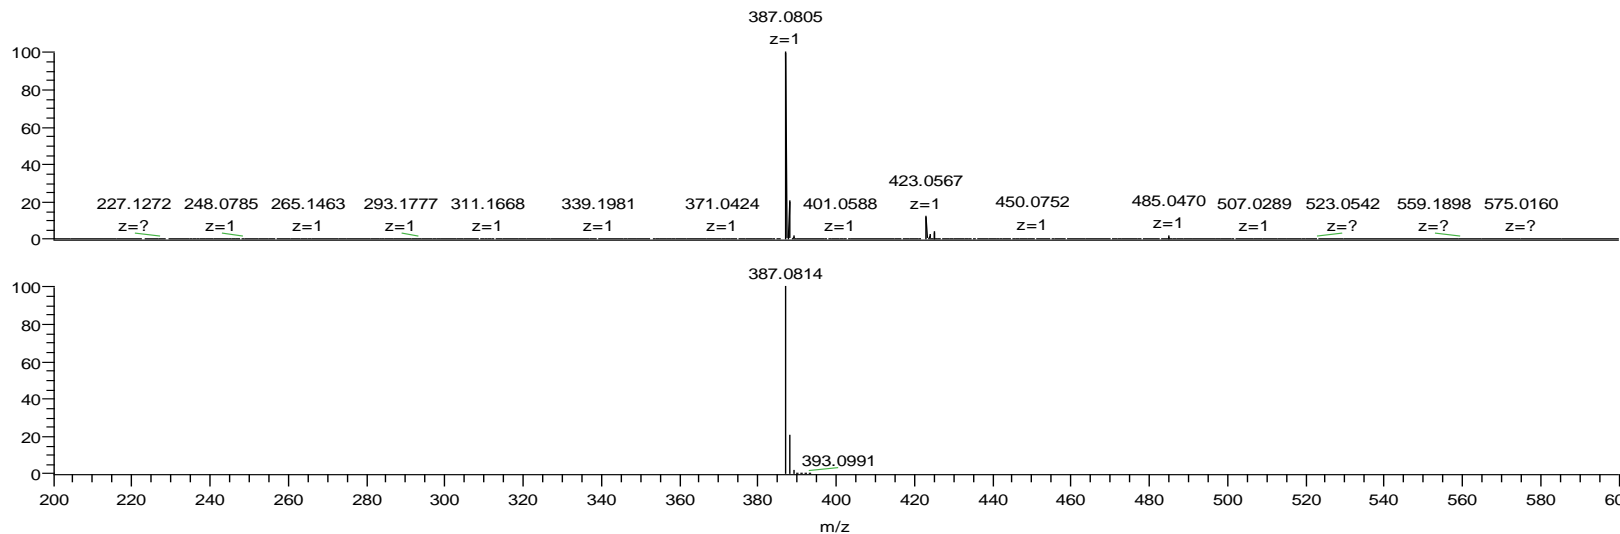

NL:  
2.12E8  
CML\_III\_089\_Orbi\_-  
ESI#14 RT: 0.11  
AV: 1 T: FTMS - p  
ESI Full ms  
[200.00-600.00]

NL:  
8.10E5  
 $C_{19}H_{13}F_6O_2^-$   
 $C_{19}H_{13}F_6O_2^-$   
pa Chrg 1



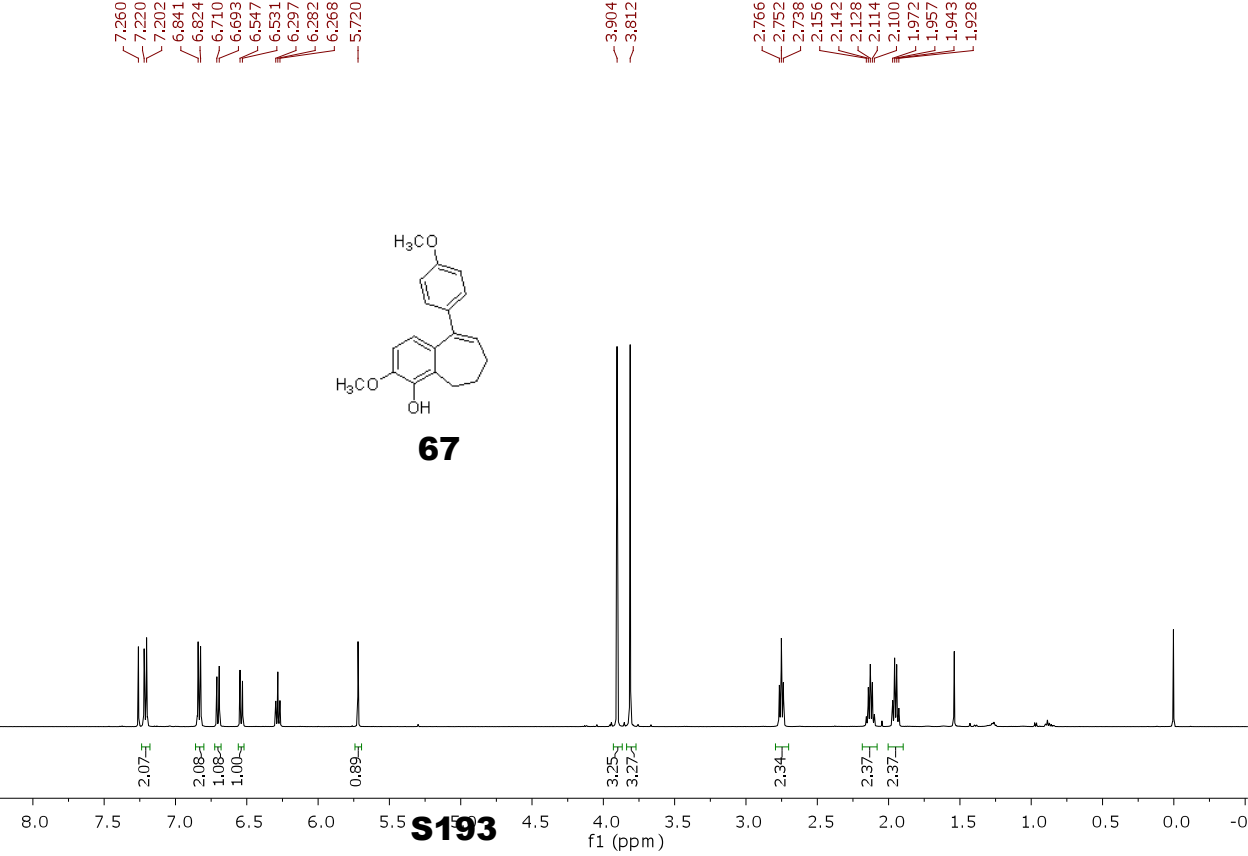

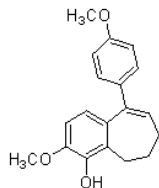

**67**

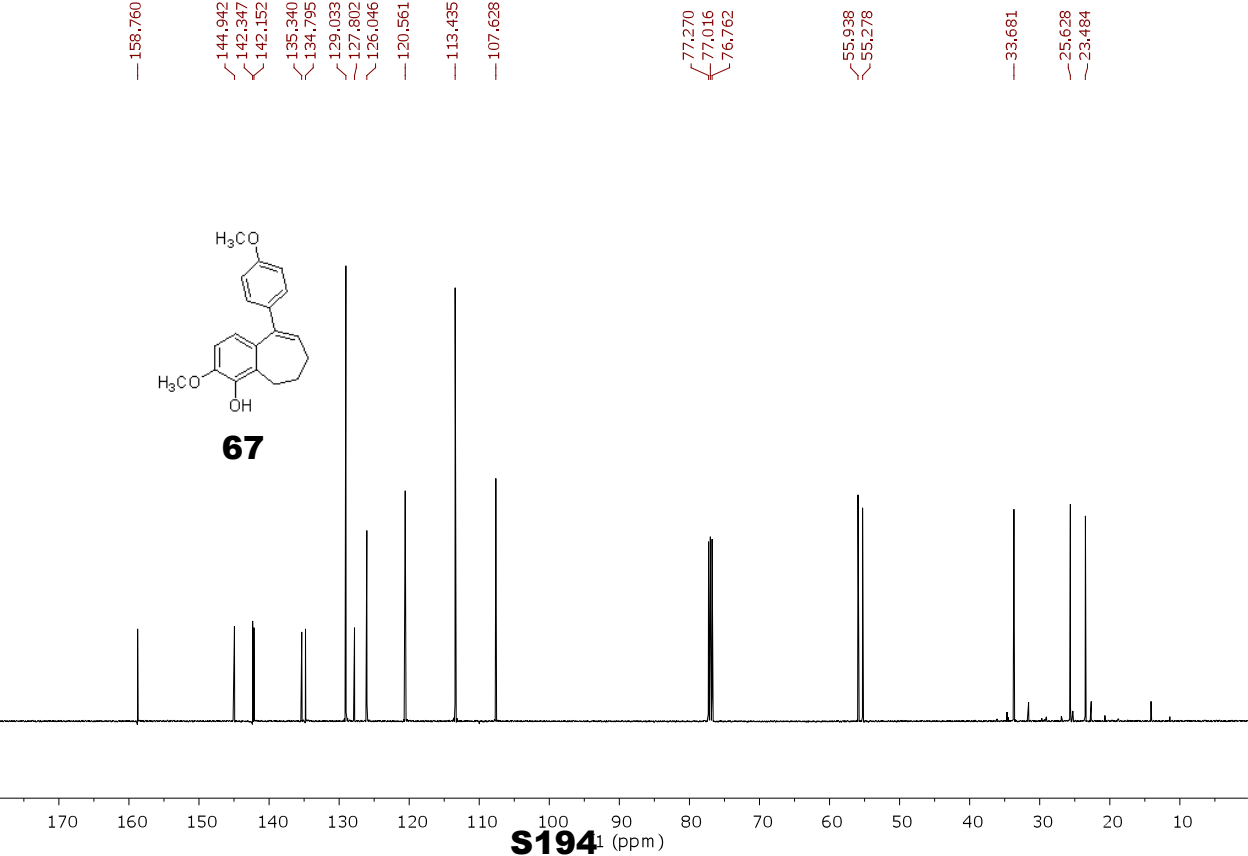

Sample Name: LD-IV-131-1A-rerun-run1

# HPLC for compound 67

=====  
Acq. Operator : Laxman  
Acq. Instrument : Instrument 1 Location : -  
Injection Date : 1/27/2014 5:37:35 PM  
Acq. Method : C:\CHEM32\1\METHODS\MASTERMETHOD.M  
Last changed : 1/27/2014 5:33:50 PM by Laxman  
Analysis Method : C:\CHEM32\1\DATA\LAXMAN\LD-IV-131-1A\LDIV131-1ARUN02.D\DA.M (MASTERMETHOD.M)  
Last changed : 1/28/2014 10:47:18 AM by Laxman  
(modified after loading)  
Sample Info : run1

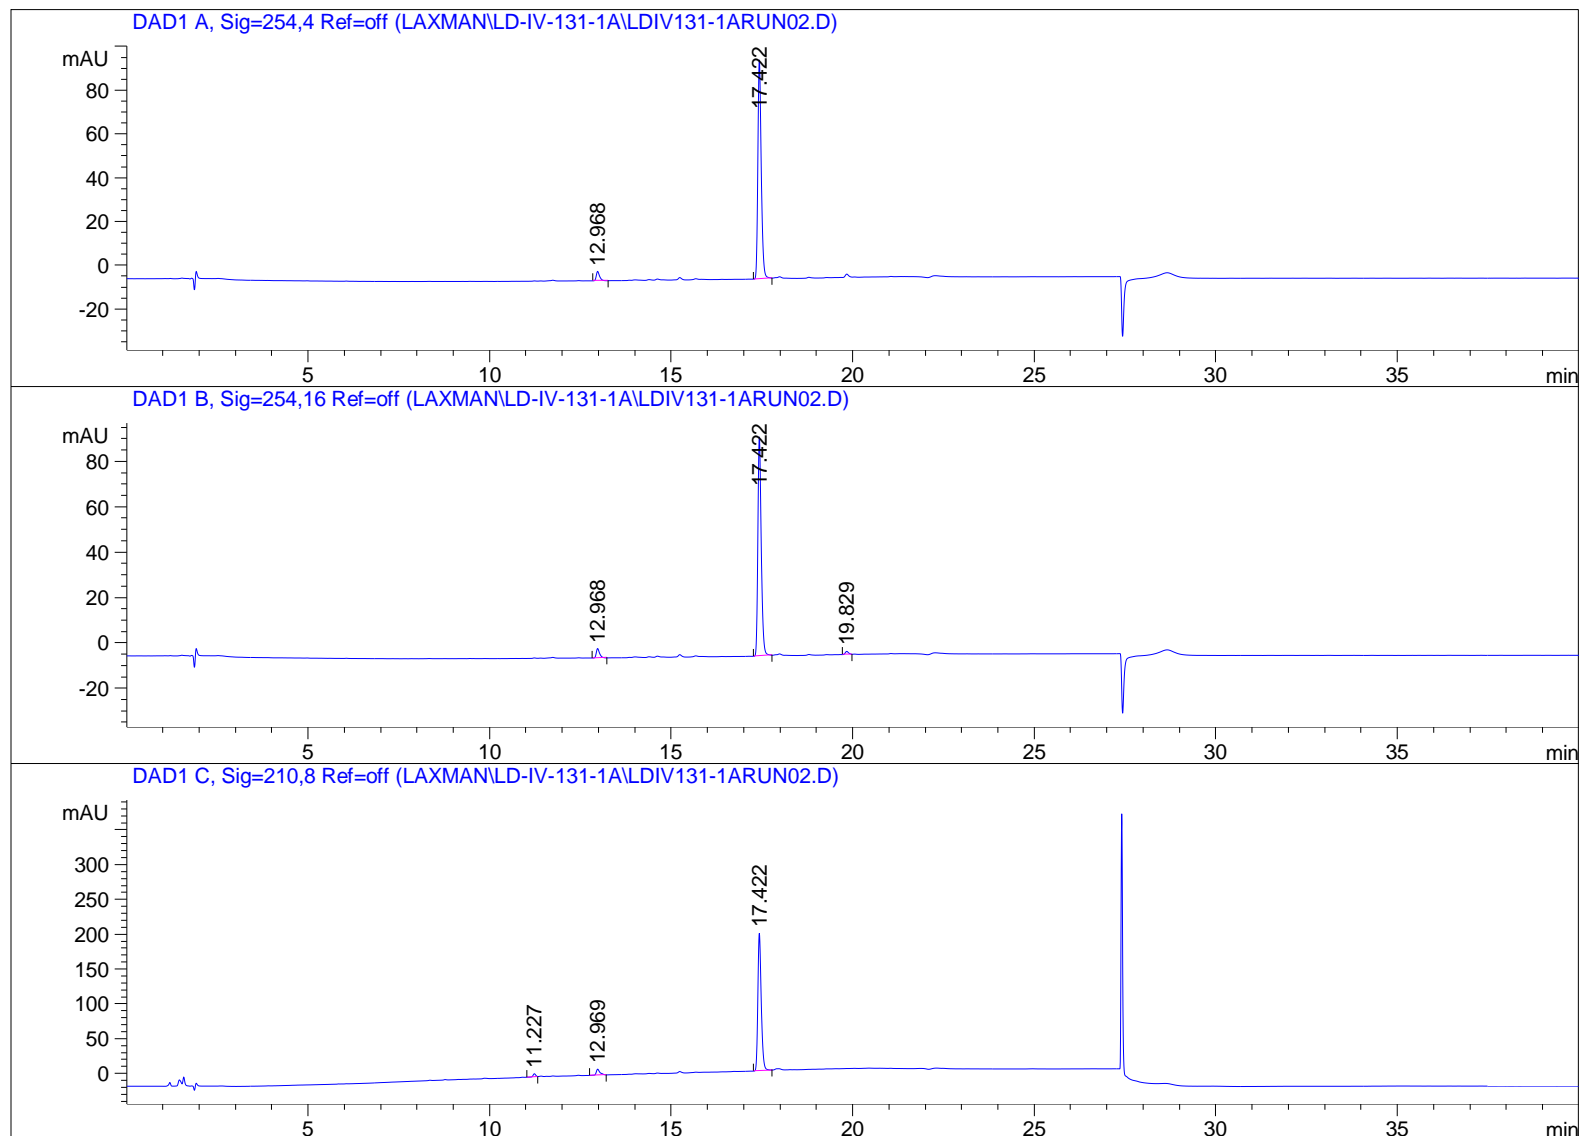

Sample Name: LD-IV-131-1A-rerun-run1

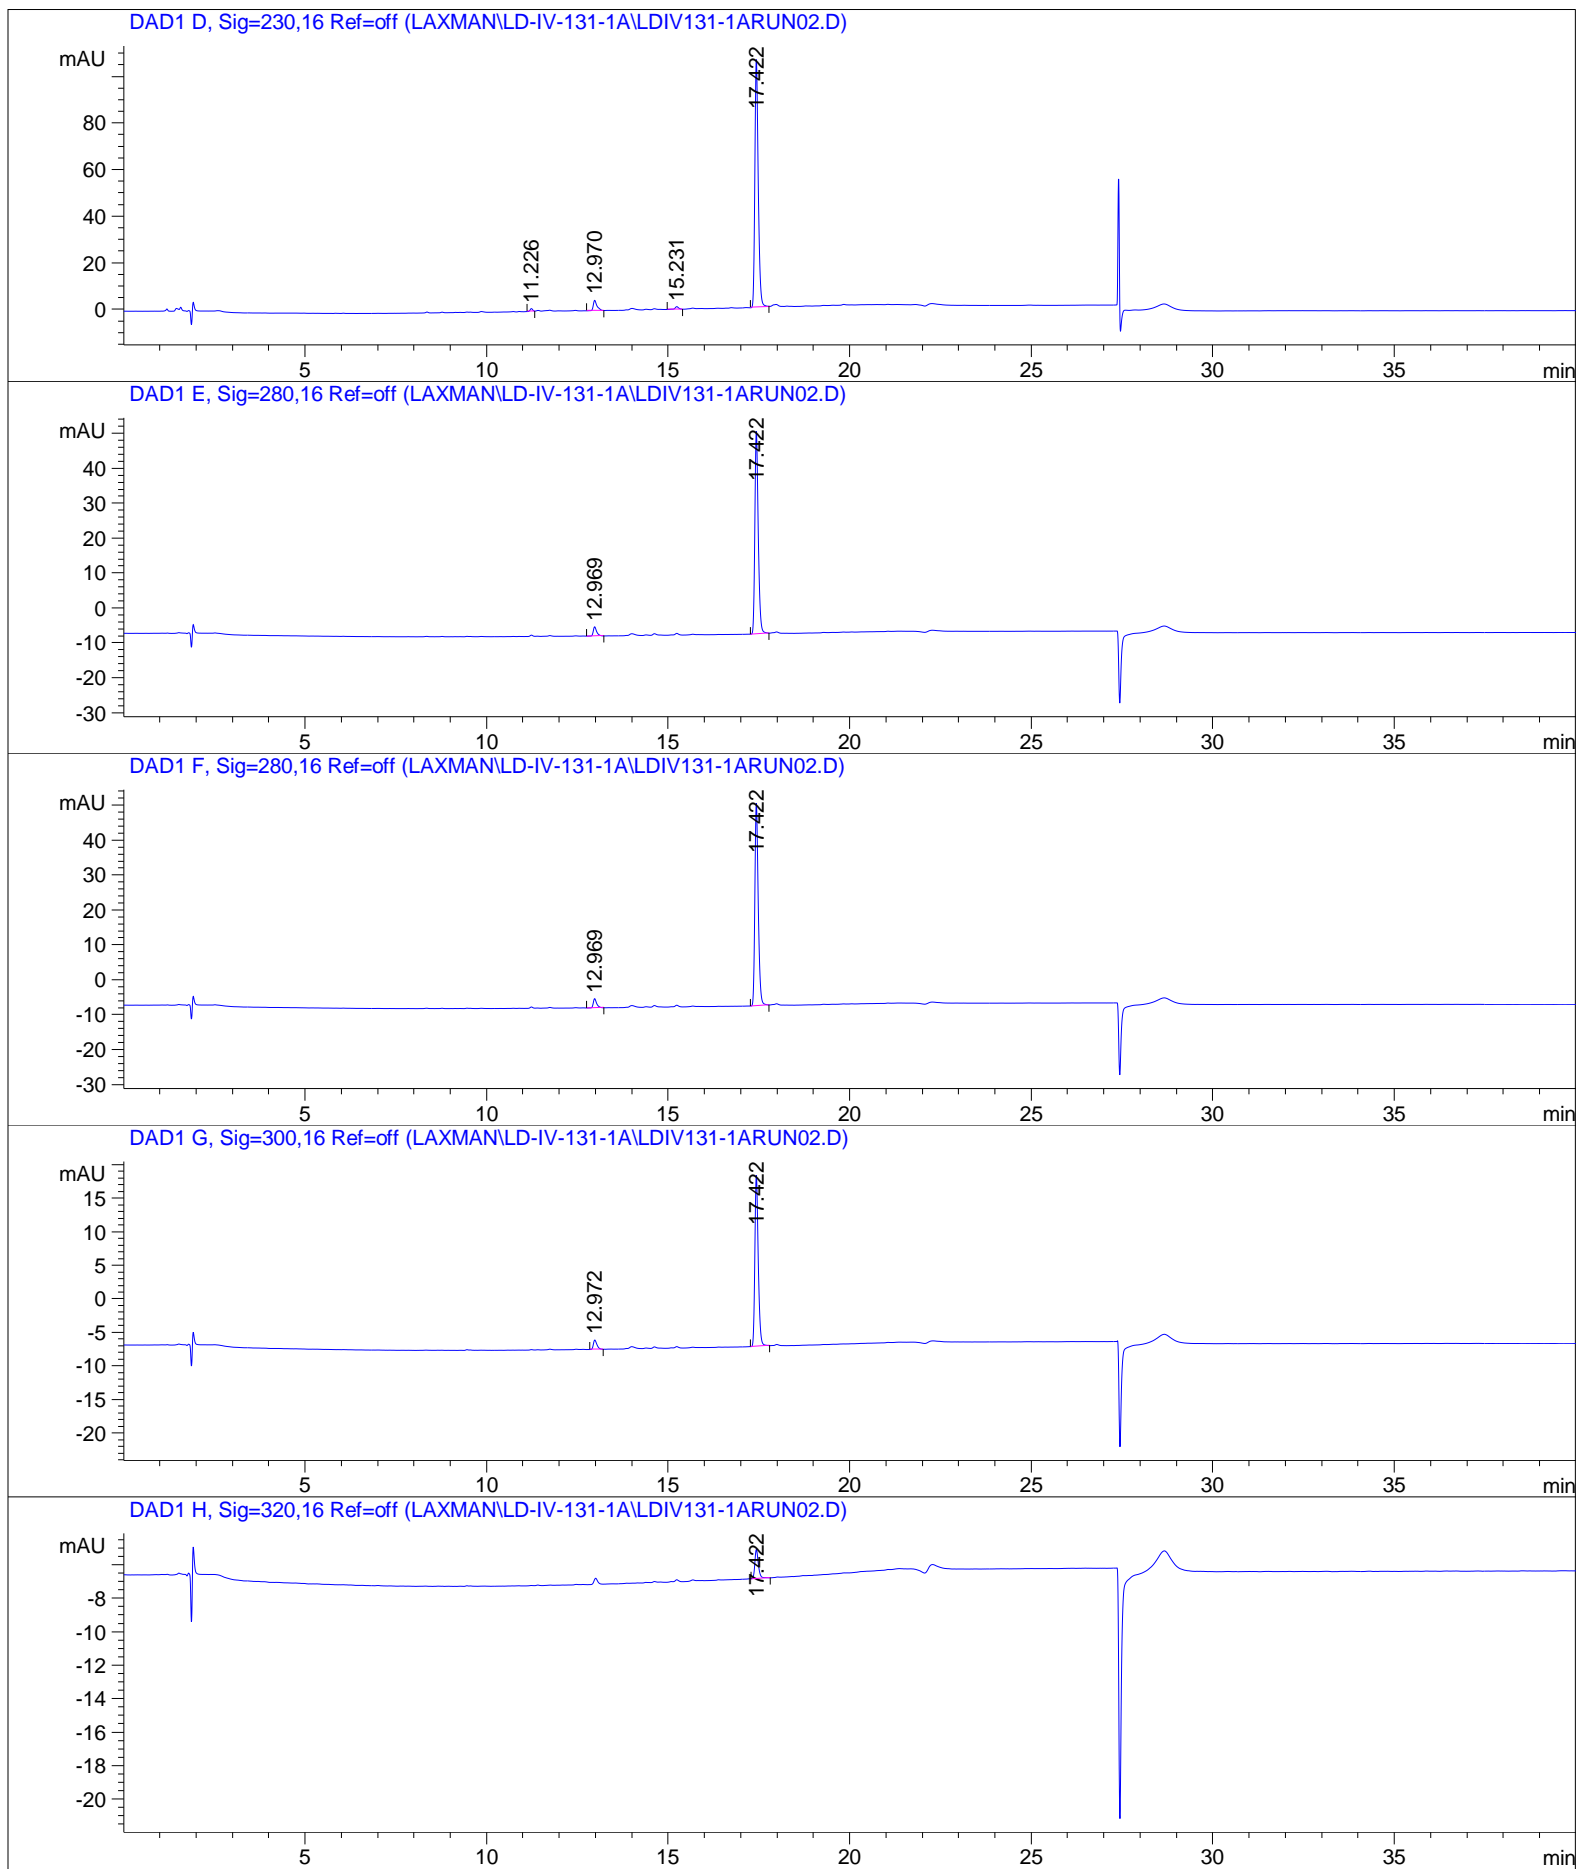

Sample Name: LD-IV-131-1A-rerun-run1

```

=====
                          Area Percent Report
=====

```

```

Sorted By           :      Signal
Multiplier          :      1.0000
Dilution           :      1.0000
Use Multiplier & Dilution Factor with ISTDs

```

Signal 1: DAD1 A, Sig=254,4 Ref=off

| Peak # | RetTime [min] | Type | Width [min] | Area [mAU*s] | Height [mAU] | Area %  |
|--------|---------------|------|-------------|--------------|--------------|---------|
| 1      | 12.968        | BB   | 0.0937      | 27.01311     | 4.27345      | 4.0000  |
| 2      | 17.422        | BB   | 0.0976      | 648.31488    | 100.04857    | 96.0000 |

```
Totals :                      675.32799  104.32202
```

Signal 2: DAD1 B, Sig=254,16 Ref=off

| Peak # | RetTime [min] | Type | Width [min] | Area [mAU*s] | Height [mAU] | Area %  |
|--------|---------------|------|-------------|--------------|--------------|---------|
| 1      | 12.968        | BB   | 0.0938      | 26.28994     | 4.15377      | 3.9796  |
| 2      | 17.422        | BB   | 0.0976      | 626.04687    | 96.60343     | 94.7661 |
| 3      | 19.829        | BB   | 0.0944      | 8.28639      | 1.33497      | 1.2543  |

```
Totals :                      660.62320  102.09217
```

Signal 3: DAD1 C, Sig=210,8 Ref=off

| Peak # | RetTime [min] | Type | Width [min] | Area [mAU*s] | Height [mAU] | Area %  |
|--------|---------------|------|-------------|--------------|--------------|---------|
| 1      | 11.227        | BV   | 0.0829      | 24.89905     | 4.61790      | 1.8119  |
| 2      | 12.969        | BB   | 0.1030      | 61.09814     | 8.58504      | 4.4460  |
| 3      | 17.422        | BV   | 0.1000      | 1288.22766   | 197.75839    | 93.7421 |

```
Totals :                      1374.22486  210.96132
```

Signal 4: DAD1 D, Sig=230,16 Ref=off

| Peak # | RetTime [min] | Type | Width [min] | Area [mAU*s] | Height [mAU] | Area %  |
|--------|---------------|------|-------------|--------------|--------------|---------|
| 1      | 11.226        | BB   | 0.0760      | 5.55864      | 1.15744      | 0.7525  |
| 2      | 12.970        | BB   | 0.1029      | 31.45657     | 4.42585      | 4.2583  |
| 3      | 15.231        | BB   | 0.1021      | 7.81155      | 1.13753      | 1.0575  |
| 4      | 17.422        | BV   | 0.0980      | 693.87982    | 106.45760    | 93.9317 |

Totals : 738.70657 113.17843

Signal 5: DAD1 E, Sig=280,16 Ref=off

| Peak # | RetTime [min] | Type | Width [min] | Area [mAU*s] | Height [mAU] | Area %  |
|--------|---------------|------|-------------|--------------|--------------|---------|
| 1      | 12.969        | BB   | 0.0958      | 17.15126     | 2.64083      | 4.3596  |
| 2      | 17.422        | BB   | 0.0977      | 376.26514    | 58.01117     | 95.6404 |

Totals : 393.41640 60.65200

Signal 6: DAD1 F, Sig=280,16 Ref=off

| Peak # | RetTime [min] | Type | Width [min] | Area [mAU*s] | Height [mAU] | Area %  |
|--------|---------------|------|-------------|--------------|--------------|---------|
| 1      | 12.969        | BB   | 0.0958      | 17.15126     | 2.64083      | 4.3596  |
| 2      | 17.422        | BB   | 0.0977      | 376.26514    | 58.01117     | 95.6404 |

Totals : 393.41640 60.65200

Signal 7: DAD1 G, Sig=300,16 Ref=off

| Peak # | RetTime [min] | Type | Width [min] | Area [mAU*s] | Height [mAU] | Area %  |
|--------|---------------|------|-------------|--------------|--------------|---------|
| 1      | 12.972        | BB   | 0.1010      | 9.45148      | 1.39534      | 5.3948  |
| 2      | 17.422        | BB   | 0.0977      | 165.74431    | 25.52812     | 94.6052 |

Totals : 175.19579 26.92346

**S198**

Sample Name: LD-IV-131-1A-rerun-run1

Signal 8: DAD1 H, Sig=320,16 Ref=off

| Peak # | RetTime [min] | Type | Width [min] | Area [mAU*s] | Height [mAU] | Area %   |
|--------|---------------|------|-------------|--------------|--------------|----------|
| 1      | 17.422        | BB   | 0.1003      | 11.65500     | 1.73621      | 100.0000 |

Totals :                            11.65500      1.73621

=====  
\*\*\* End of Report \*\*\*

**S199**

# HRMS for compound 67

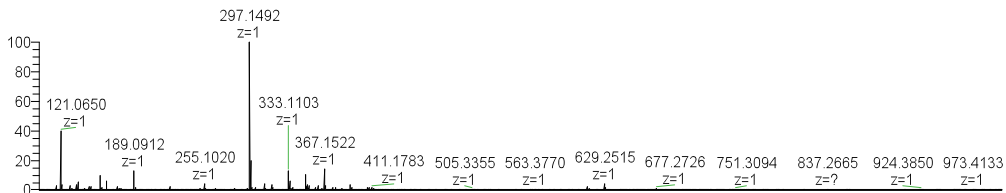

NL:  
2.73E8  
LD-IV-131-  
1A\_140325113955#12  
RT: 0.11 AV: 1 T: FTMS  
+ p ESI sid=35.00 Full  
ms [100.00-1000.00]

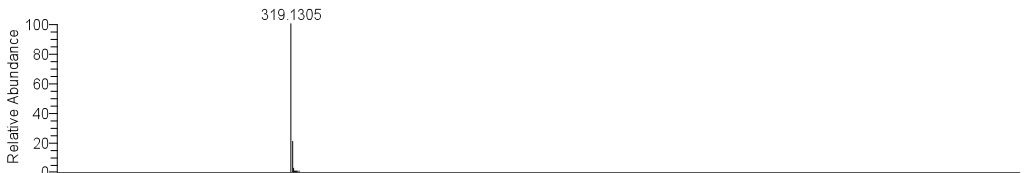

NL:  
8.07E5  
C19H20O3+Na  
C19H20O3Na1  
pa Chrg 1

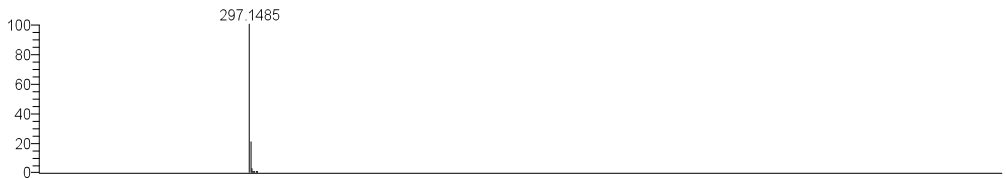

NL:  
8.07E5  
C19H20O3+H  
C19H21O3  
pa Chrg 1

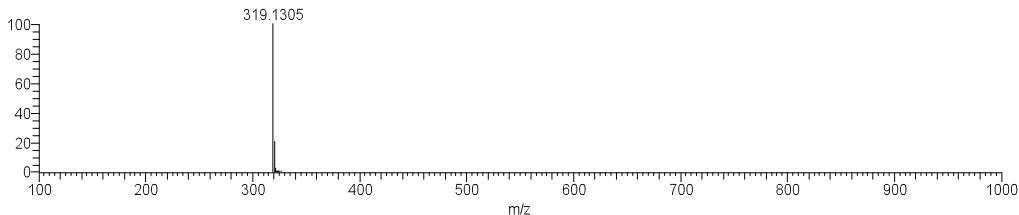

NL:  
8.07E5  
C19H20O3+Na  
C19H20O3Na1  
pa Chrg 1

**S200**



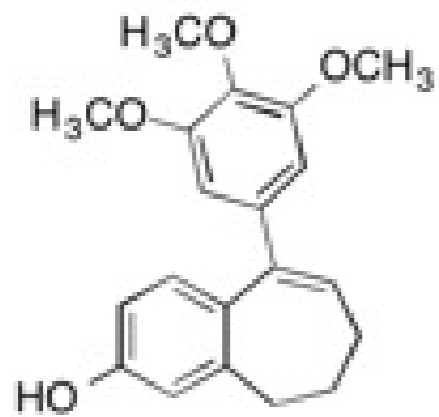

**68**

6.899  
6.883  
6.787  
6.781  
6.684  
6.679  
6.667  
6.662  
6.499  
6.345  
6.330  
6.316  
6.213

3.877  
3.786

2.600  
2.586  
2.572  
2.170  
2.156  
2.142  
2.127  
2.113  
1.982  
1.968  
1.953  
1.939

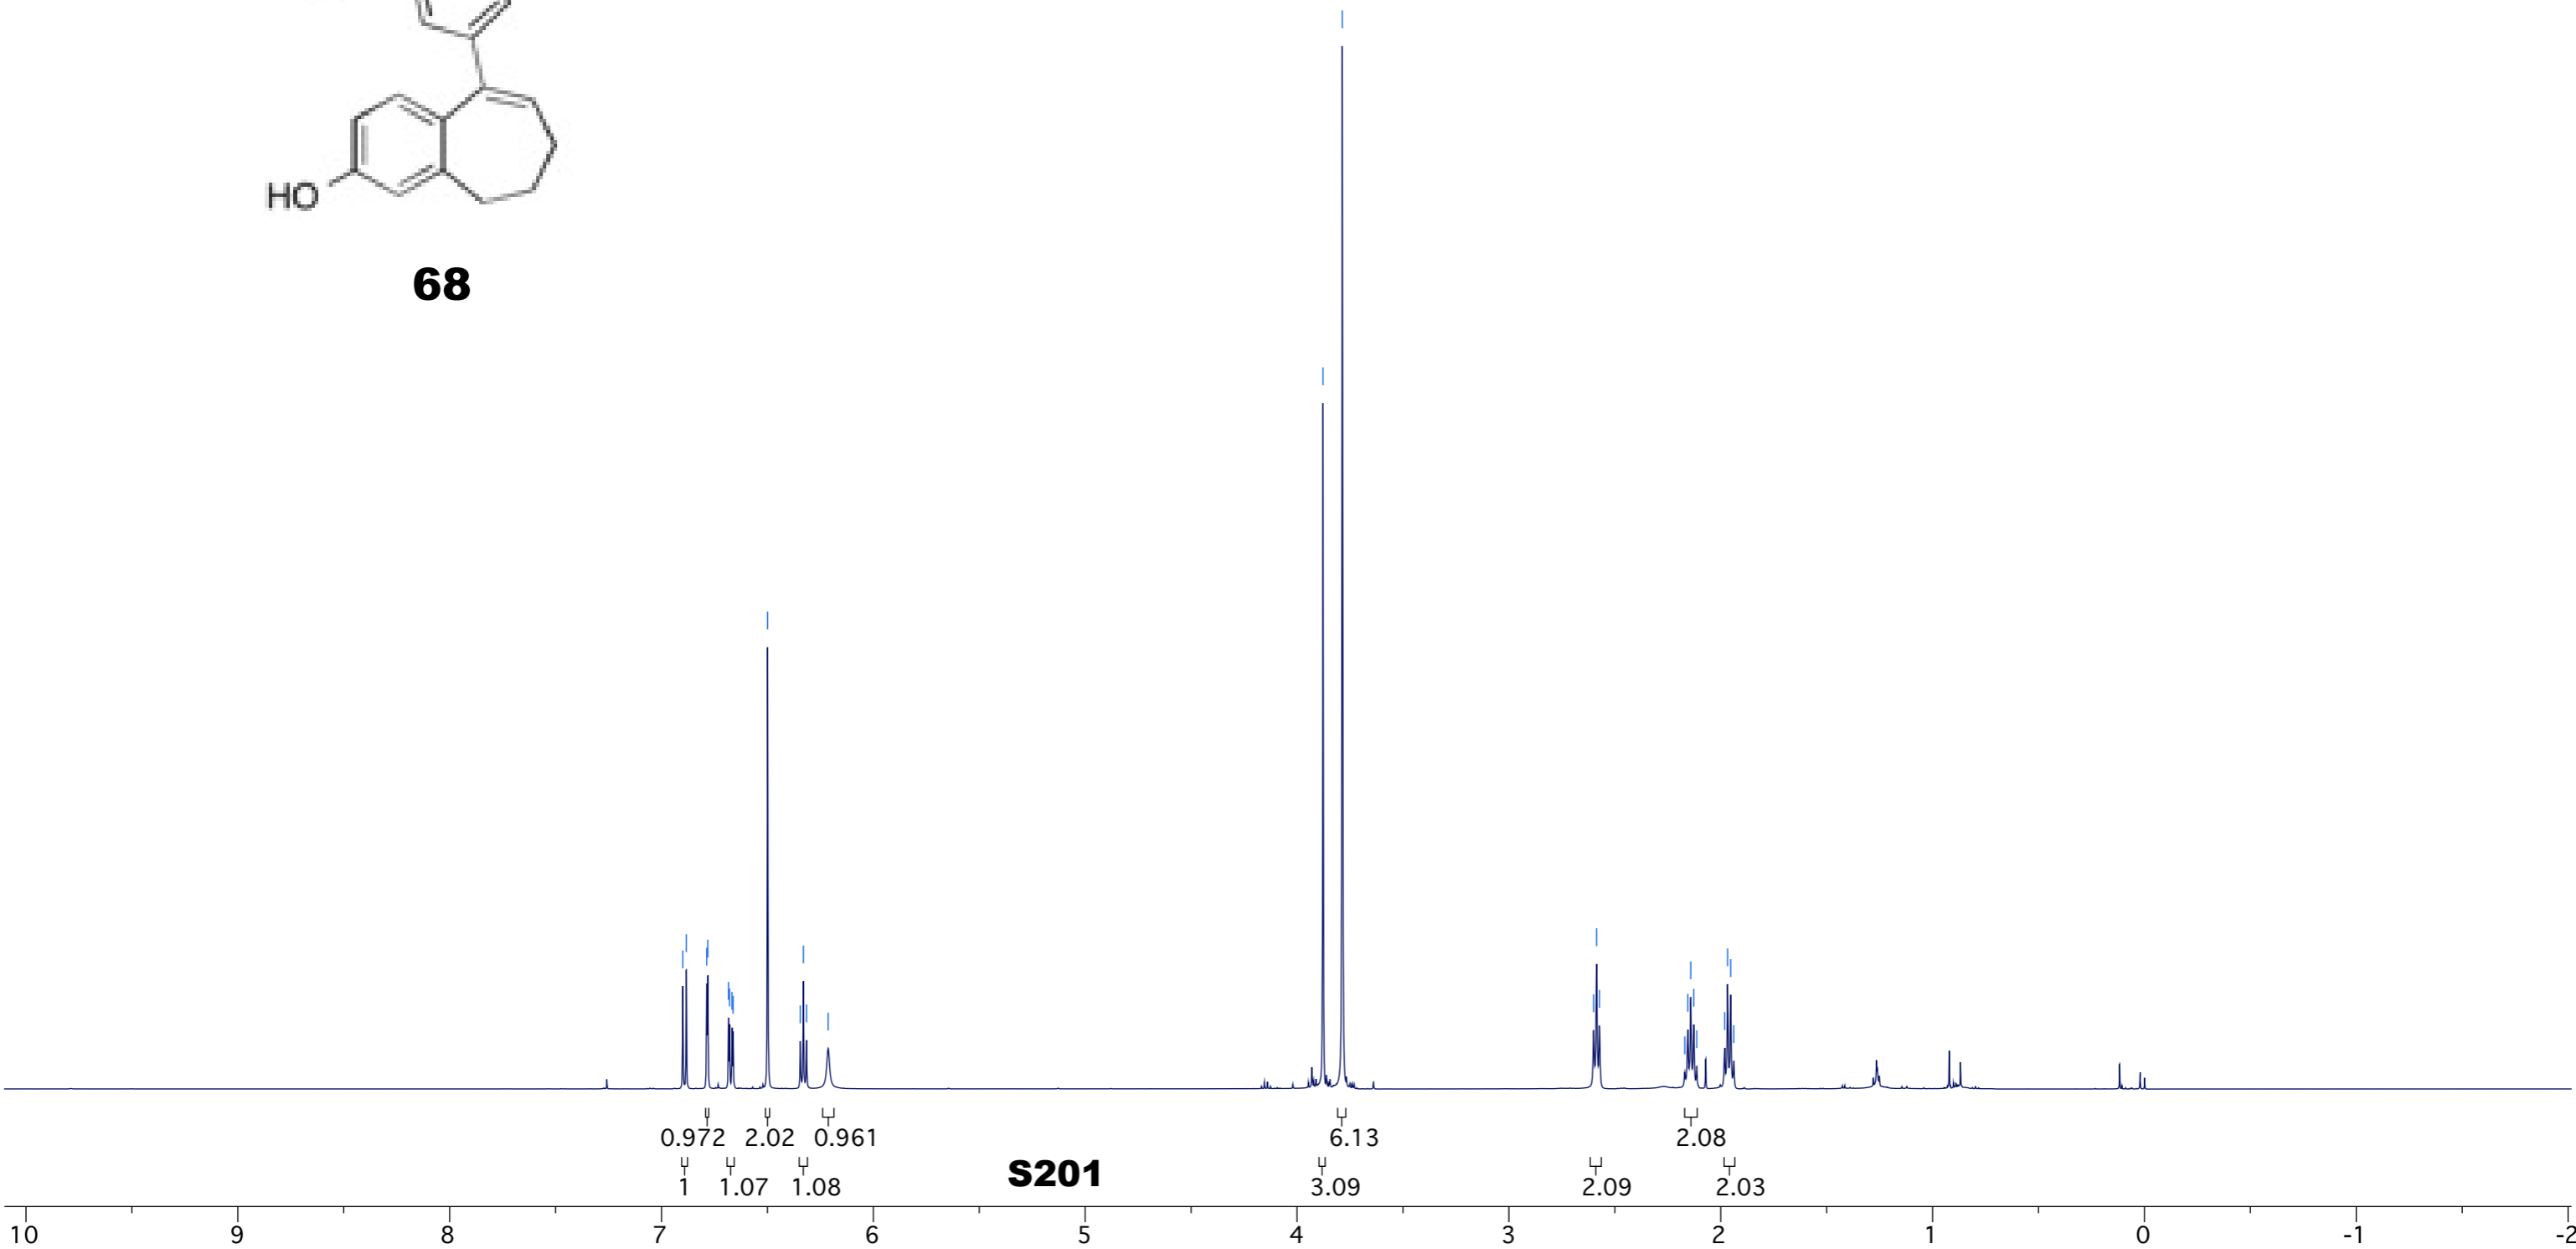

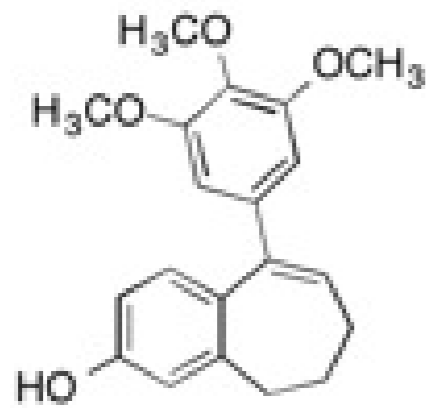

**68**

154.858  
152.758  
143.978  
142.680  
138.704  
137.036  
132.125  
130.654  
127.057  
115.409  
112.868  
105.280  
60.952  
56.099  
35.009  
32.597  
25.485

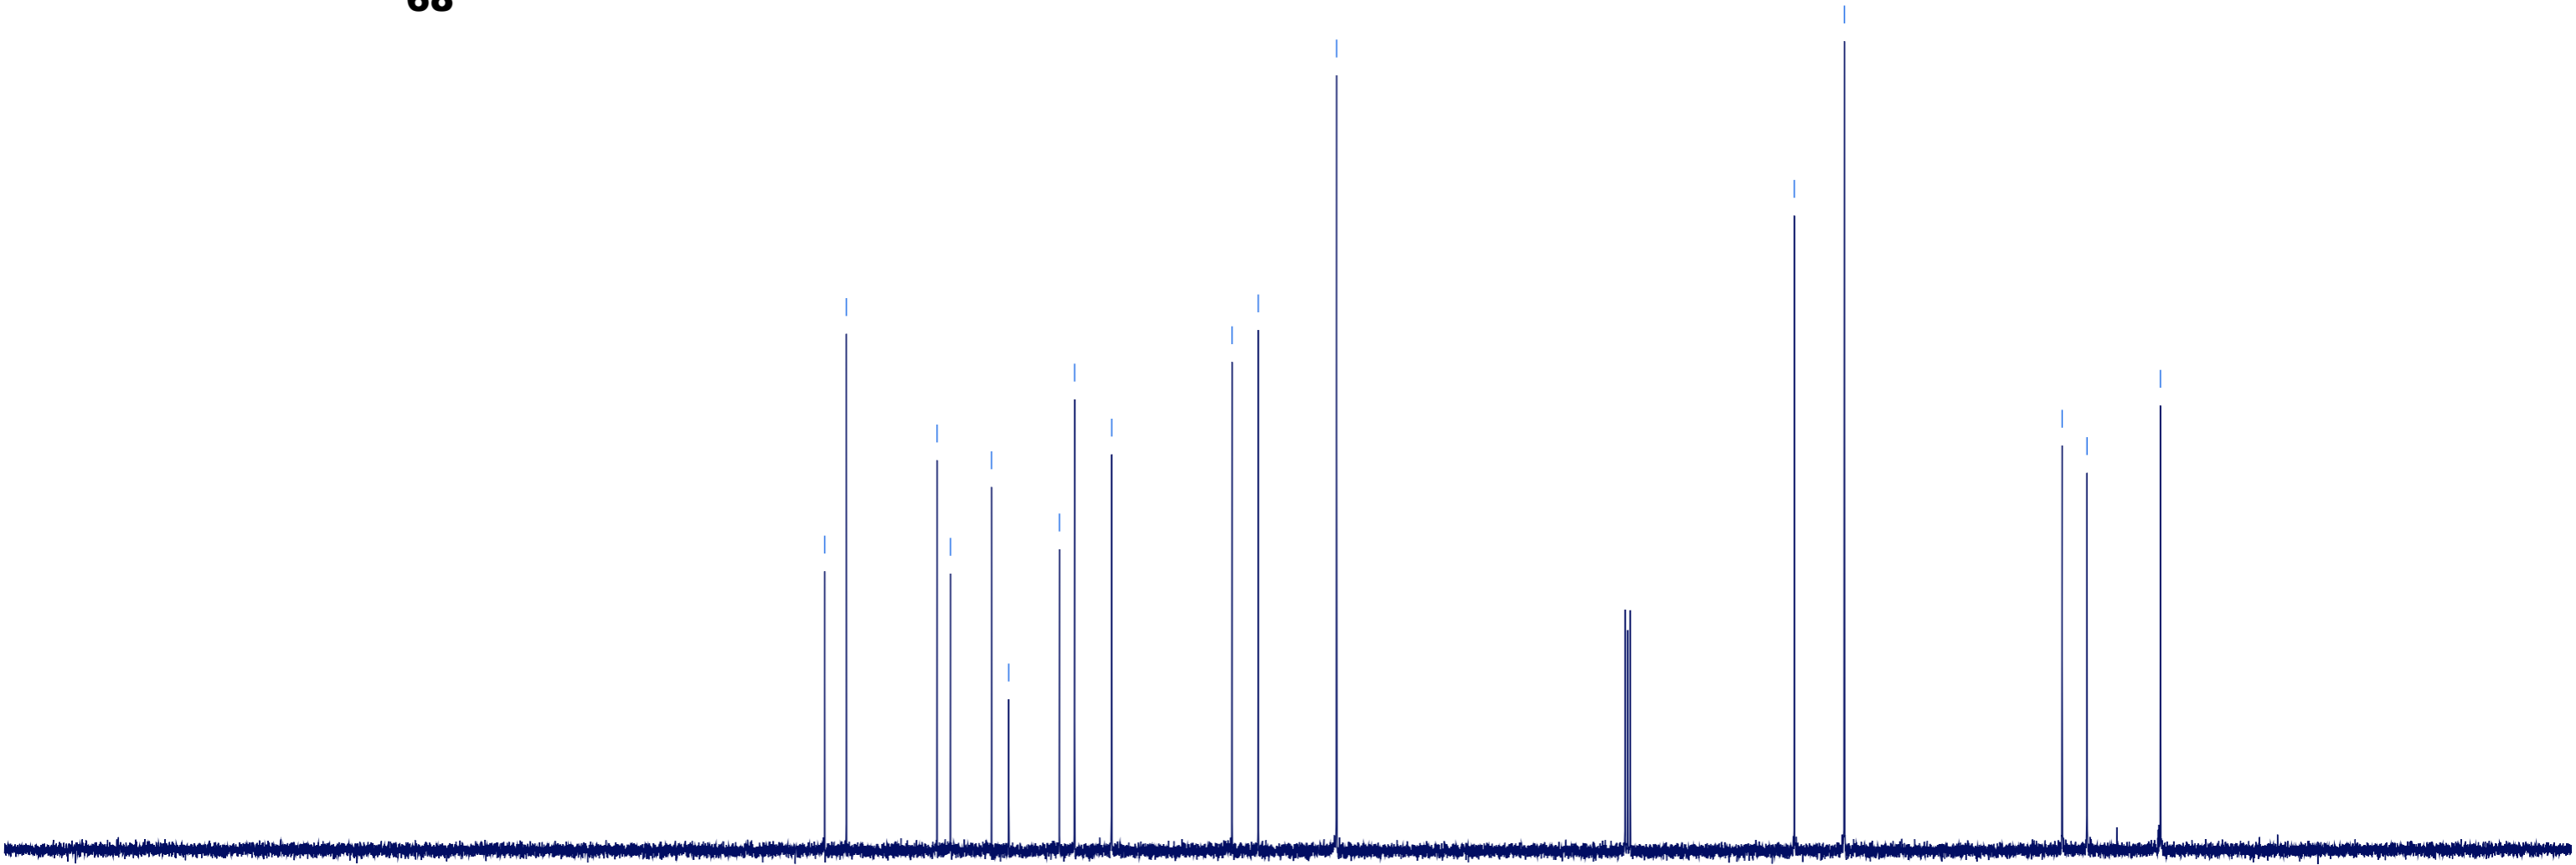

**S202**

230 220 210 200 190 180 170 160 150 140 130 120 110 100 90 80 70 60 50 40 30 20 10 0 -10

**HPLC for compound 68**

=====  
Acq. Operator : Christine  
Acq. Instrument : Instrument 1 Location : -  
Injection Date : 10/9/2013 1:55:20 PM  
Acq. Method : C:\CHEM32\1\METHODS\MASTERMETHOD.M  
Last changed : 10/9/2013 1:53:39 PM by Christine  
Analysis Method : C:\CHEM32\1\DATA\CHRISTINE\TG-1-78000007.D\DA.M (MASTERMETHOD.M)  
Last changed : 10/9/2013 3:34:35 PM by Christine

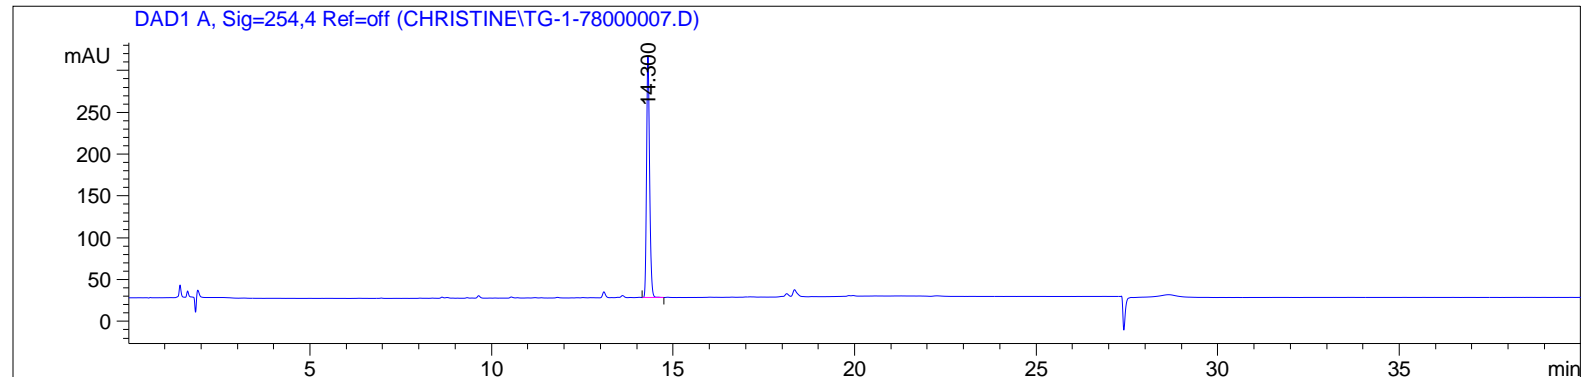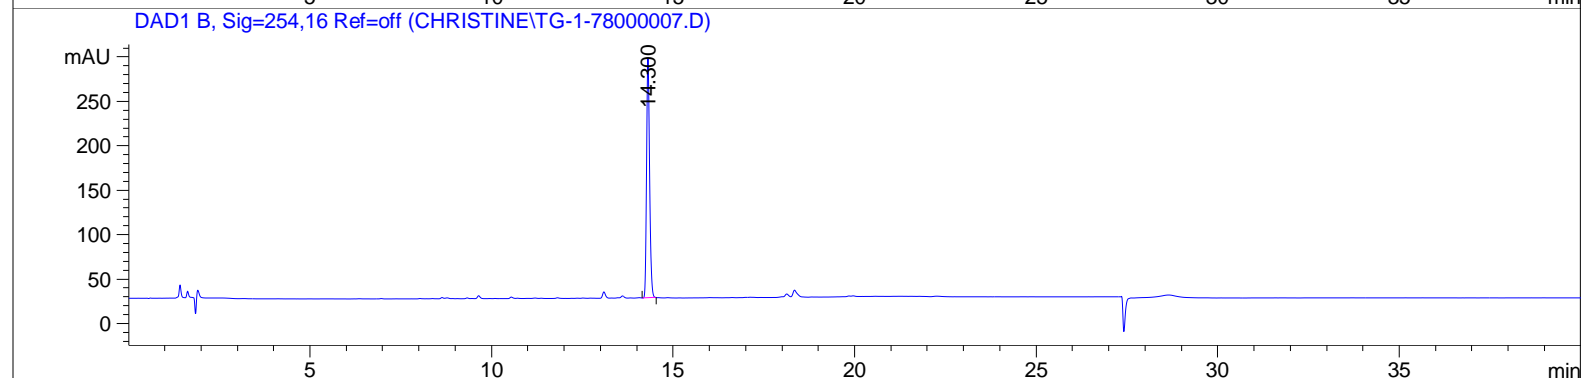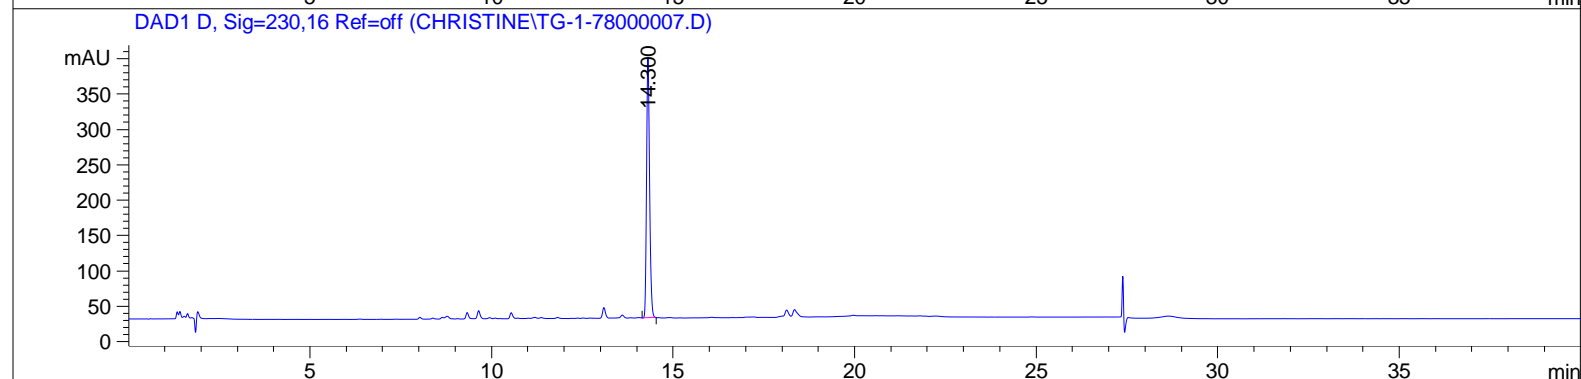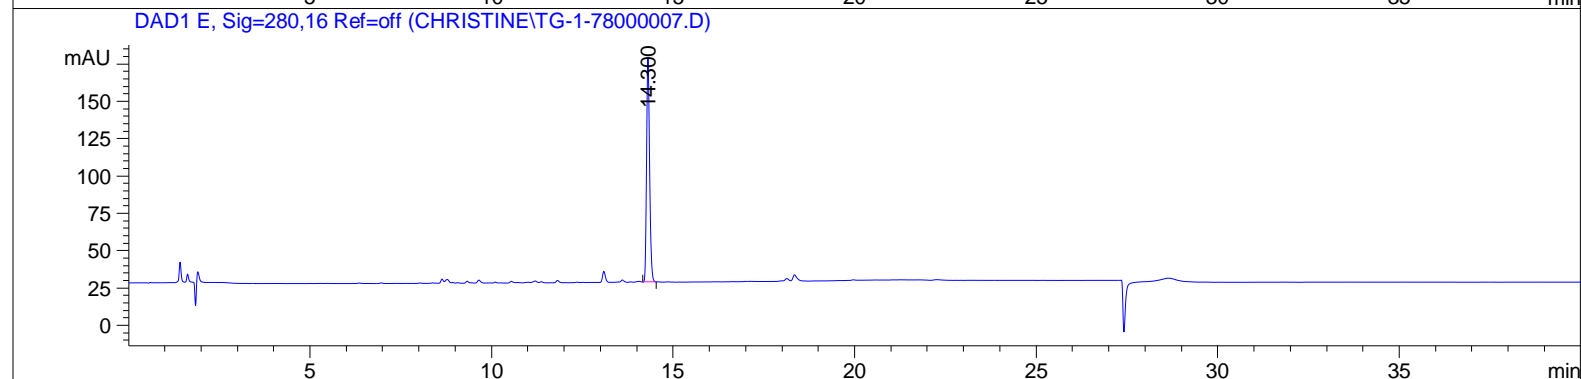**S203**

Sample Name: TG-1-78

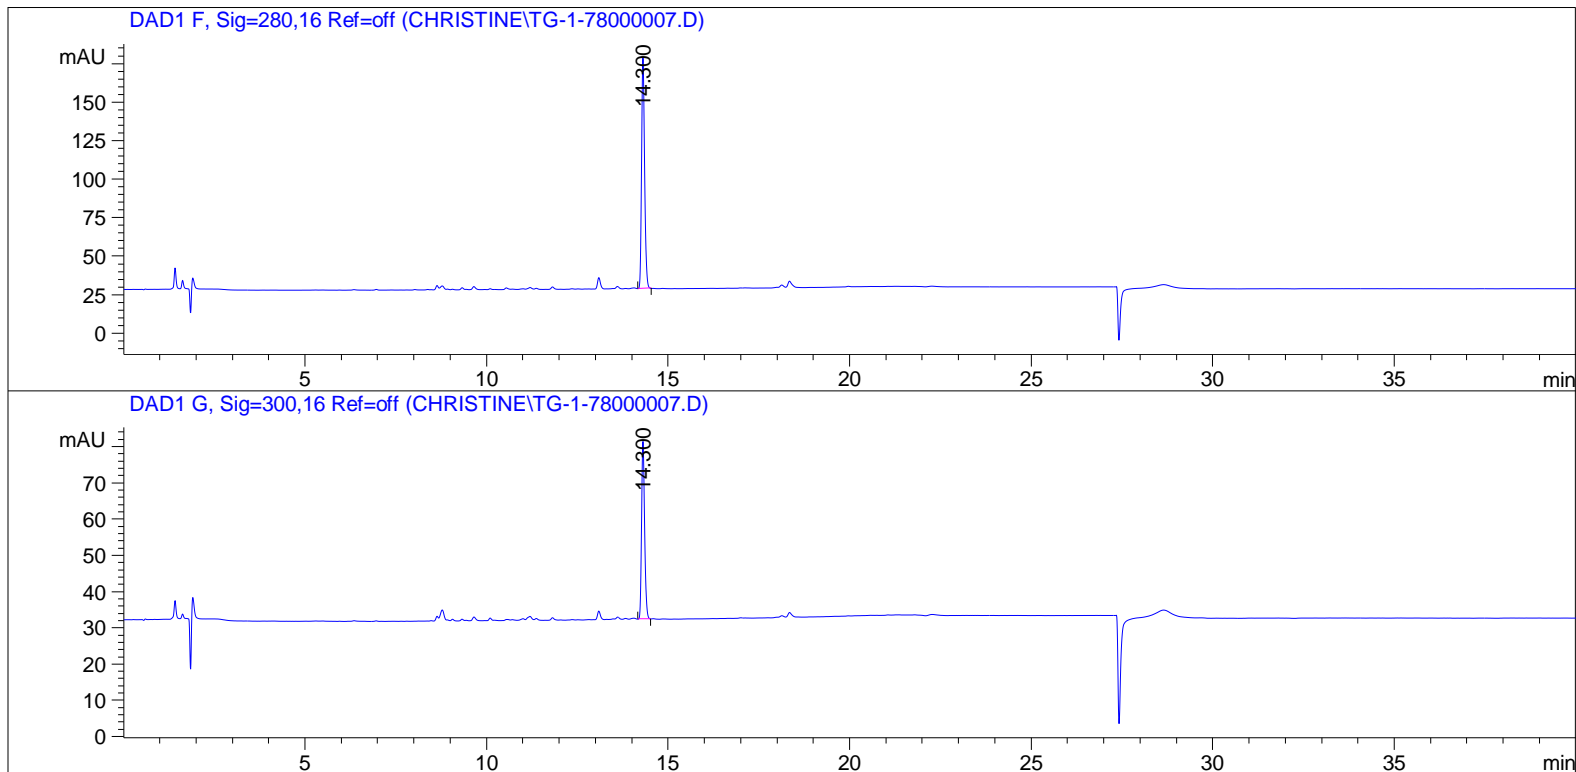

```
=====
                          Area Percent Report
=====
```

```
Sorted By           :      Signal
Multiplier          :      1.0000
Dilution            :      1.0000
Use Multiplier & Dilution Factor with ISTDs
```

Signal 1: DAD1 A, Sig=254,4 Ref=off

| Peak # | RetTime [min] | Type | Width [min] | Area [mAU*s] | Height [mAU] | Area %   |
|--------|---------------|------|-------------|--------------|--------------|----------|
| 1      | 14.300        | BB   | 0.0879      | 1684.01782   | 289.35425    | 100.0000 |

```
Totals :                1684.01782  289.35425
```

Signal 2: DAD1 B, Sig=254,16 Ref=off

| Peak # | RetTime [min] | Type | Width [min] | Area [mAU*s] | Height [mAU] | Area %   |
|--------|---------------|------|-------------|--------------|--------------|----------|
| 1      | 14.300        | BB   | 0.0877      | 1571.10010   | 270.80679    | 100.0000 |

```
Totals :                1571.10010  270.80679
```

**S204**

Signal 3: DAD1 D, Sig=230,16 Ref=off

| Peak # | RetTime [min] | Type | Width [min] | Area [mAU*s] | Height [mAU] | Area %   |
|--------|---------------|------|-------------|--------------|--------------|----------|
| 1      | 14.300        | BB   | 0.0878      | 2134.54639   | 367.43820    | 100.0000 |

Totals : 2134.54639 367.43820

Signal 4: DAD1 E, Sig=280,16 Ref=off

| Peak # | RetTime [min] | Type | Width [min] | Area [mAU*s] | Height [mAU] | Area %   |
|--------|---------------|------|-------------|--------------|--------------|----------|
| 1      | 14.300        | BB   | 0.0877      | 870.89191    | 150.12962    | 100.0000 |

Totals : 870.89191 150.12962

Signal 5: DAD1 F, Sig=280,16 Ref=off

| Peak # | RetTime [min] | Type | Width [min] | Area [mAU*s] | Height [mAU] | Area %   |
|--------|---------------|------|-------------|--------------|--------------|----------|
| 1      | 14.300        | BB   | 0.0877      | 870.89191    | 150.12962    | 100.0000 |

Totals : 870.89191 150.12962

Signal 6: DAD1 G, Sig=300,16 Ref=off

| Peak # | RetTime [min] | Type | Width [min] | Area [mAU*s] | Height [mAU] | Area %   |
|--------|---------------|------|-------------|--------------|--------------|----------|
| 1      | 14.300        | BB   | 0.0877      | 285.43219    | 49.20289     | 100.0000 |

Totals : 285.43219 49.20289

=====  
\*\*\* End of Report \*\*\*

**S205**

# HRMS for compound 68

NL:  
7.96E5  
C<sub>20</sub>H<sub>23</sub>O<sub>4</sub>  
C<sub>20</sub>H<sub>23</sub>O<sub>4</sub>  
pa Chrg 1

NL:  
7.97E5  
C<sub>20</sub>H<sub>22</sub>O<sub>4</sub>Na:  
C<sub>20</sub>H<sub>22</sub>O<sub>4</sub>Na<sub>1</sub>  
pa Chrg 1

NL:  
1.72E8  
TG\_1\_78\_ESI\_+  
Orbi#10 RT: 0.09  
AV: 1 T: FTMS + p  
ESI Full ms  
[100.00-600.00]

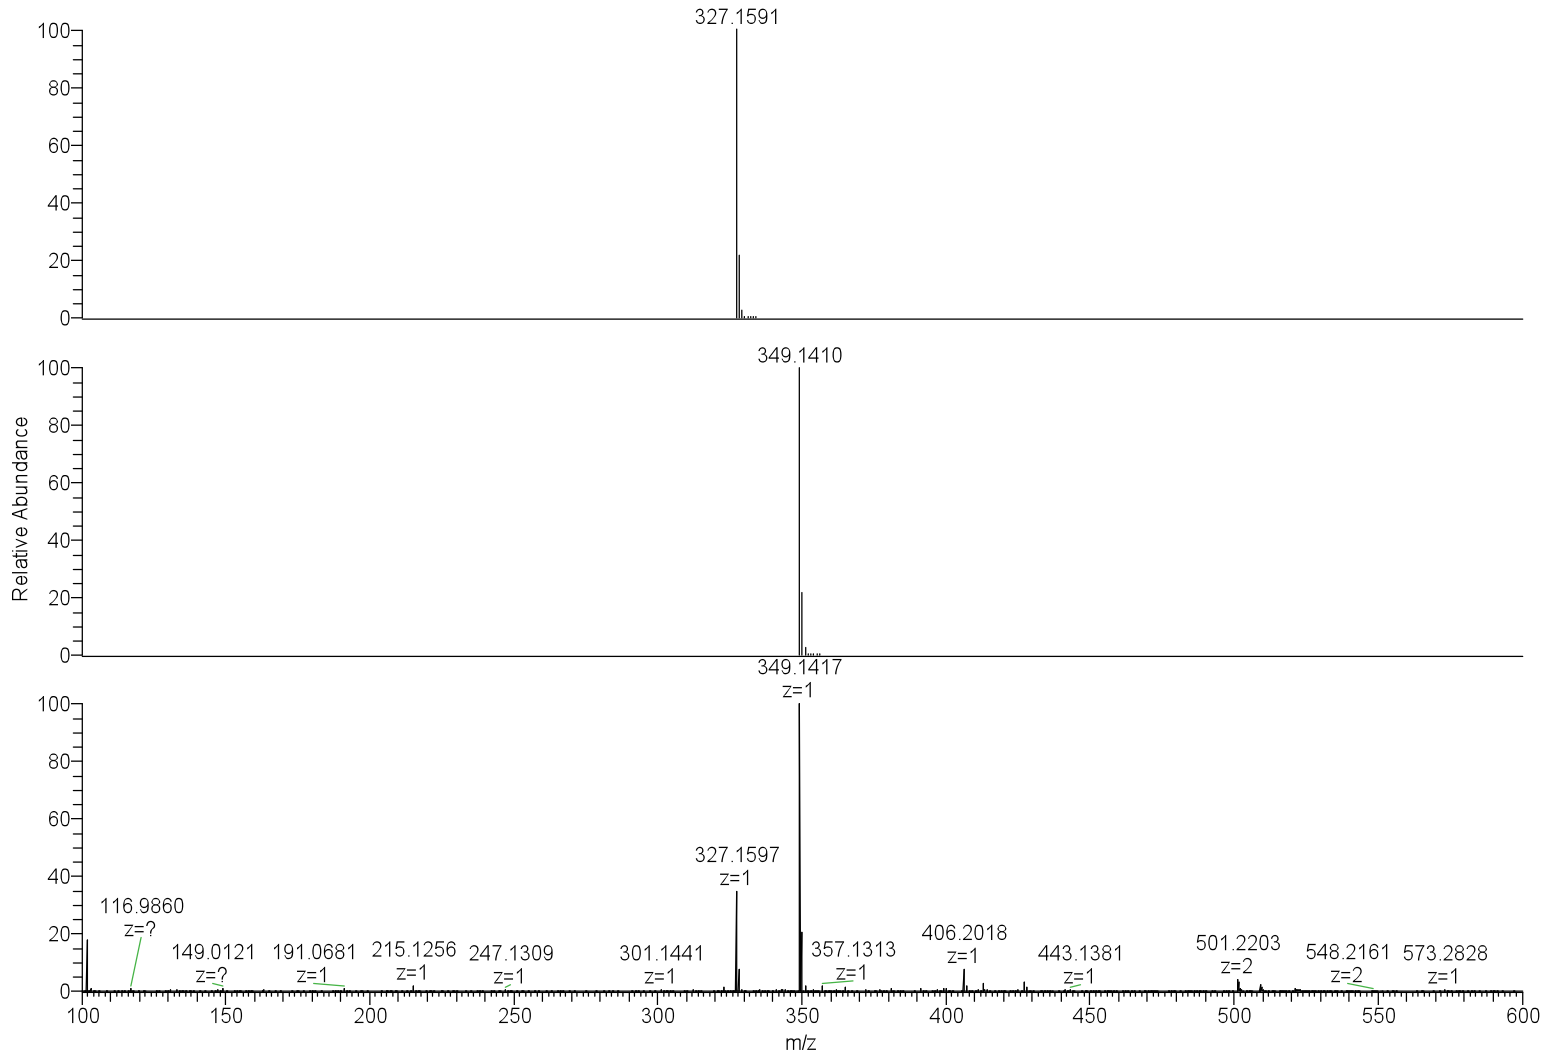

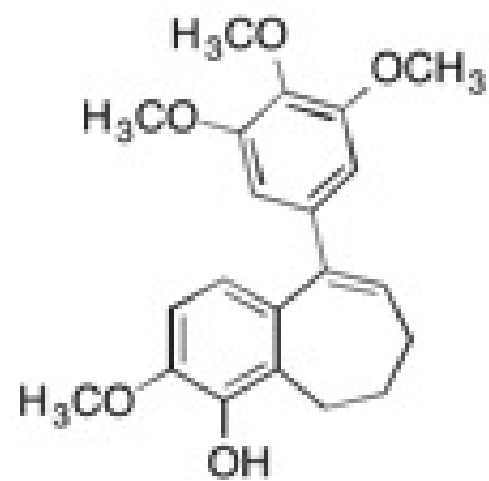

**69**

6.731  
6.714  
6.589  
6.573  
6.512  
6.361  
6.347  
6.332

5.743

3.925  
3.885  
3.871  
3.812

2.788  
2.774  
2.760  
2.182  
2.168  
2.154  
2.140  
2.126  
2.056  
1.997  
1.983  
1.969  
1.954

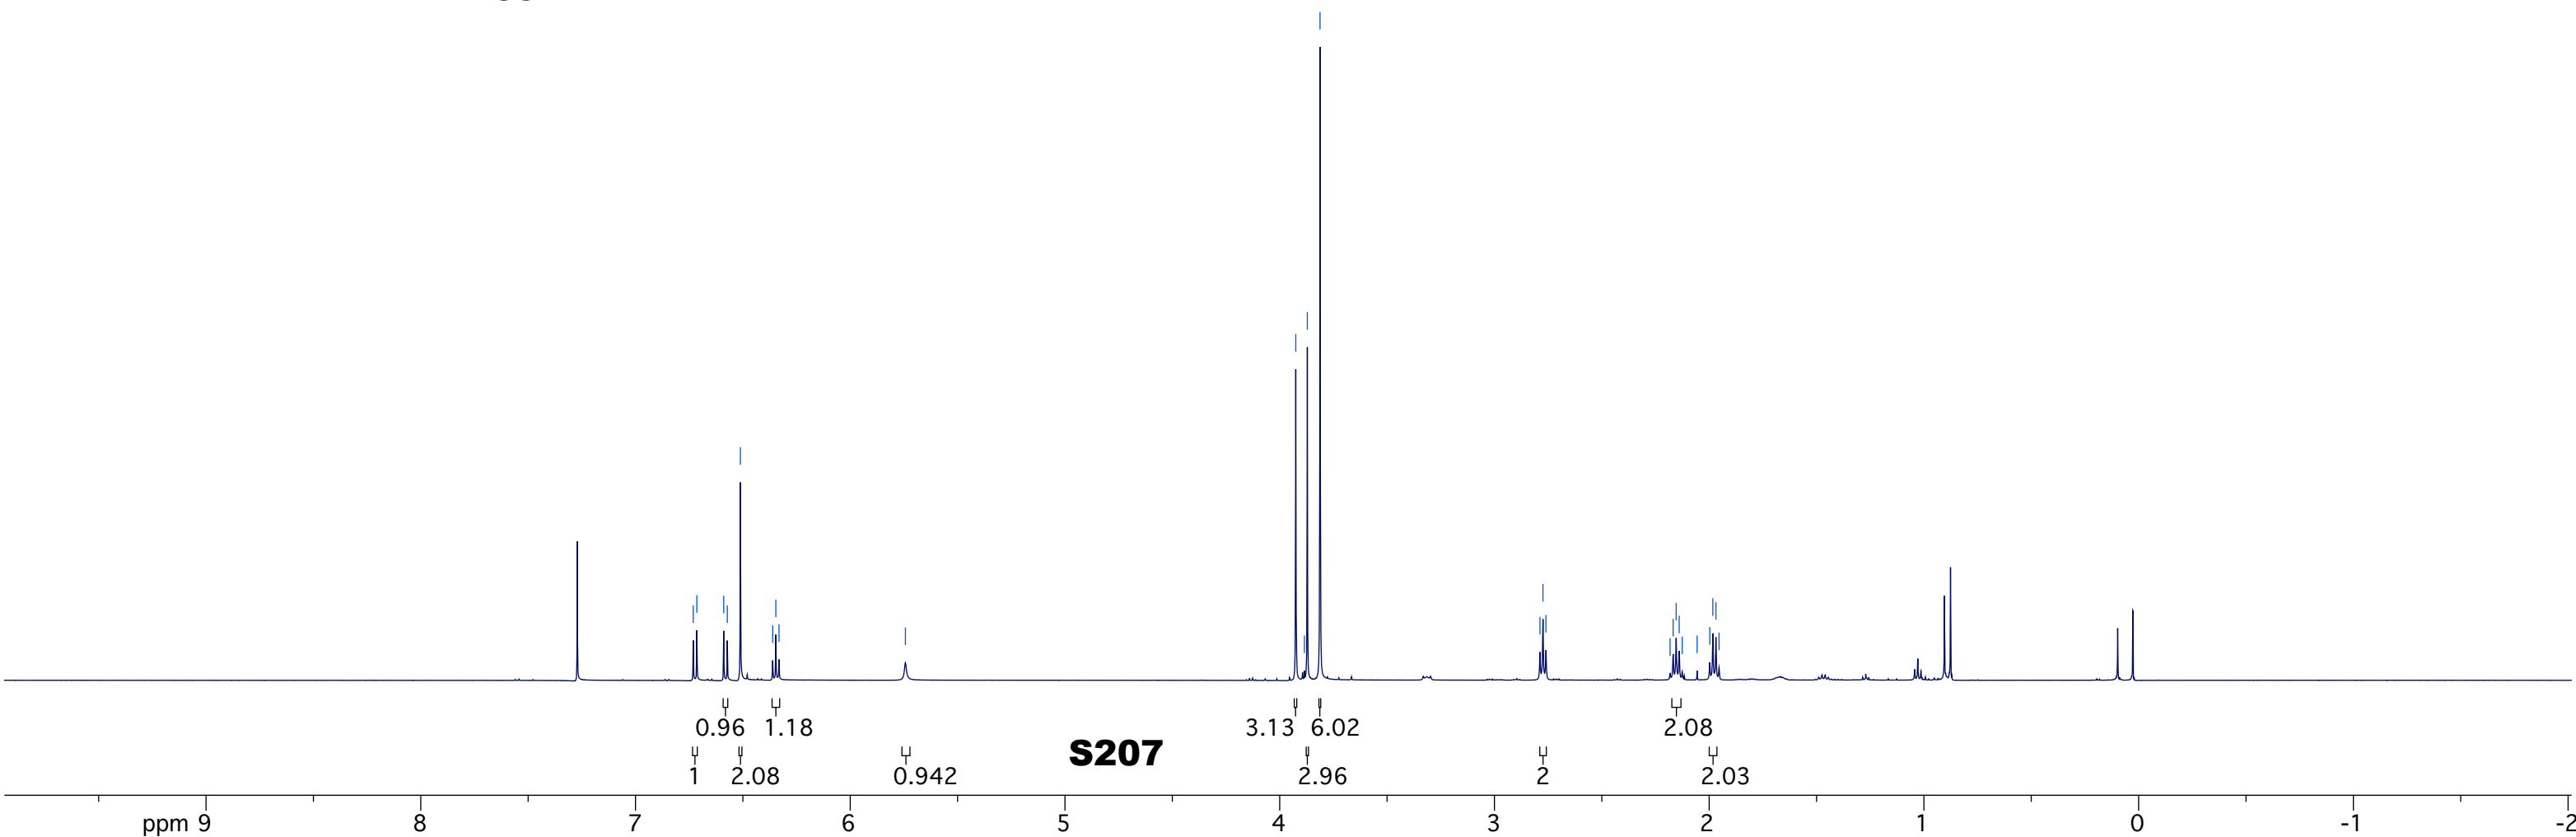

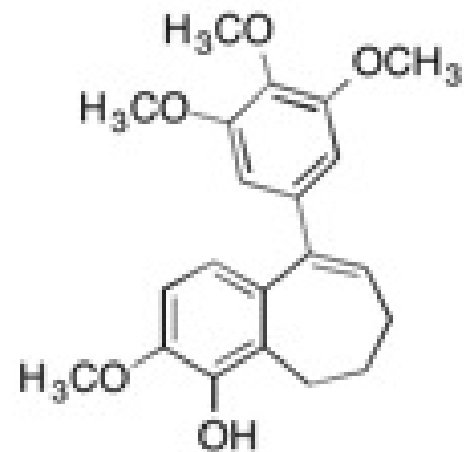

**69**

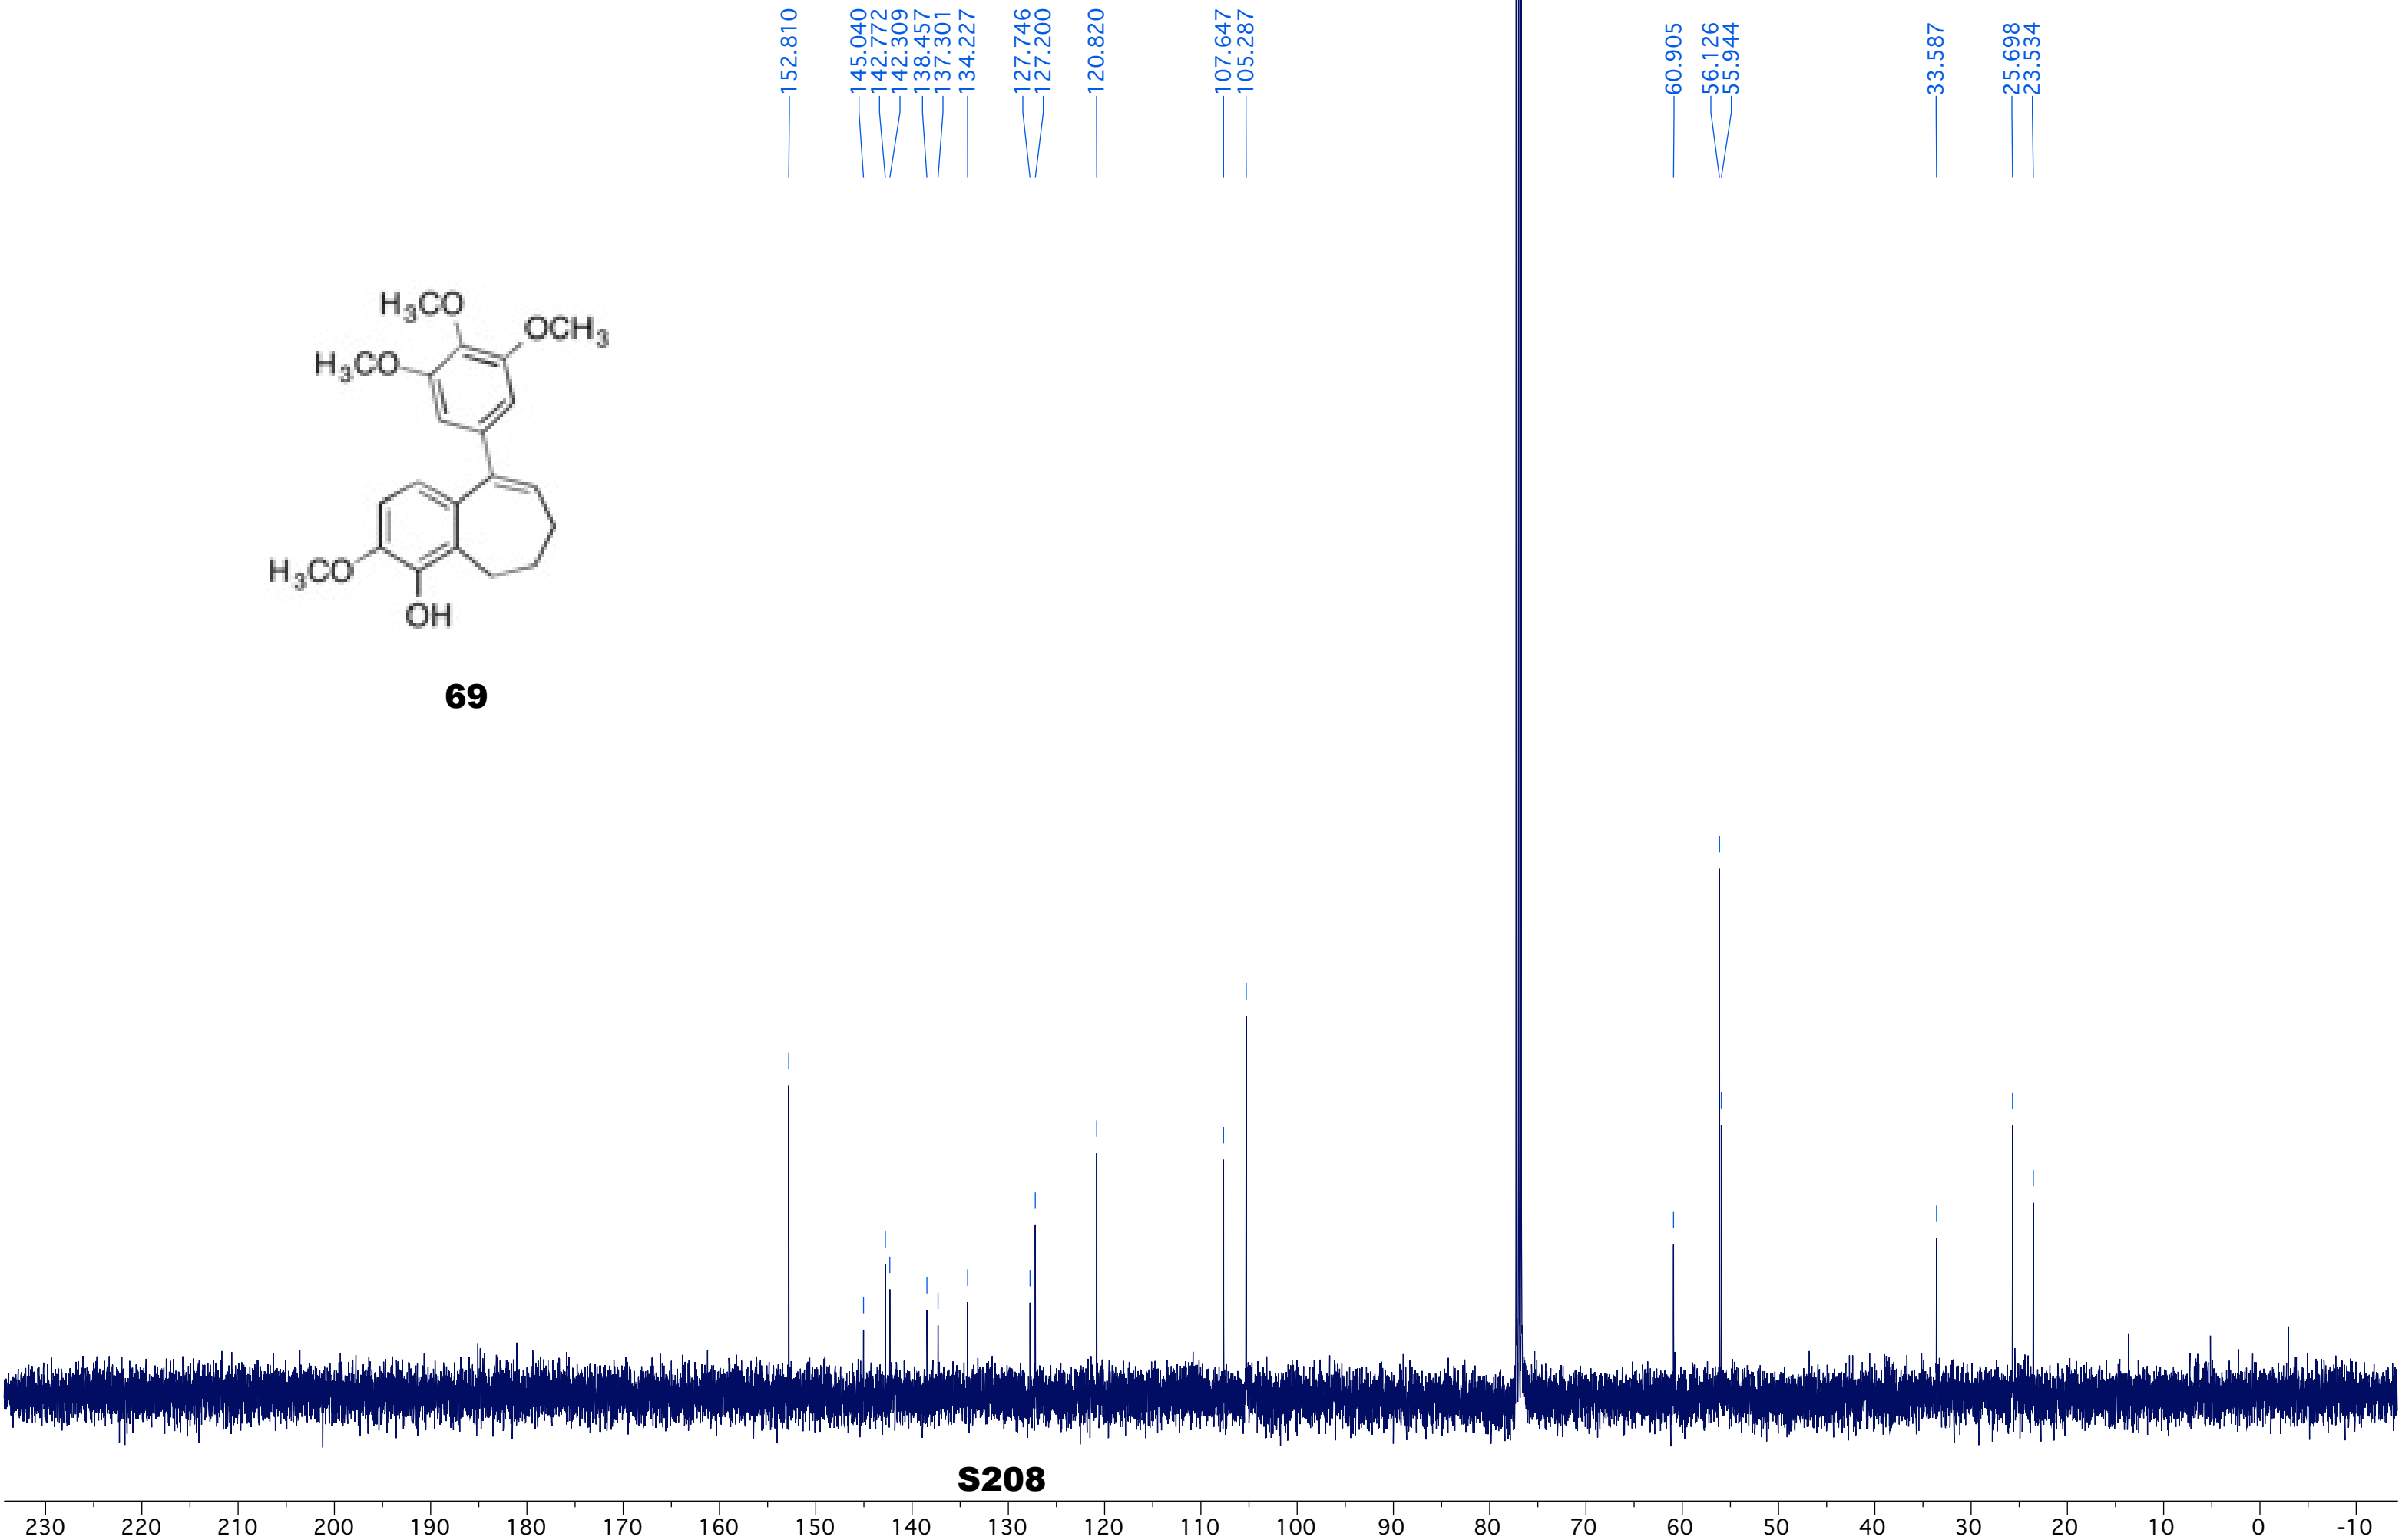



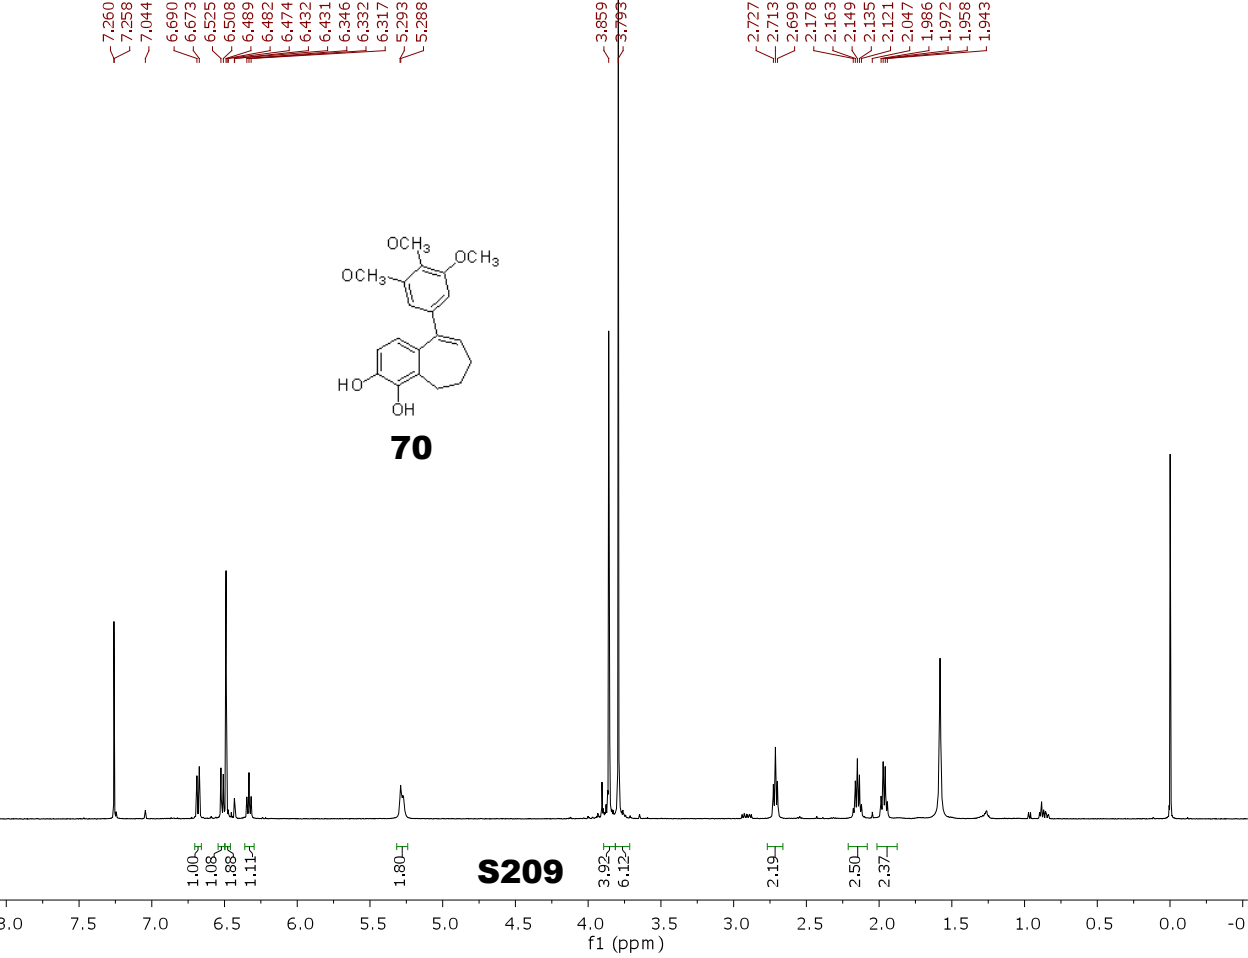

152.798  
142.897  
141.820  
140.807  
138.319  
137.274  
134.101  
128.513  
127.004  
121.704  
112.303  
105.268  
77.239 cdd  
76.085 cdd  
76.731 cdd  
60.910  
56.103  
33.784  
25.580  
23.805

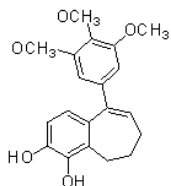

**70**

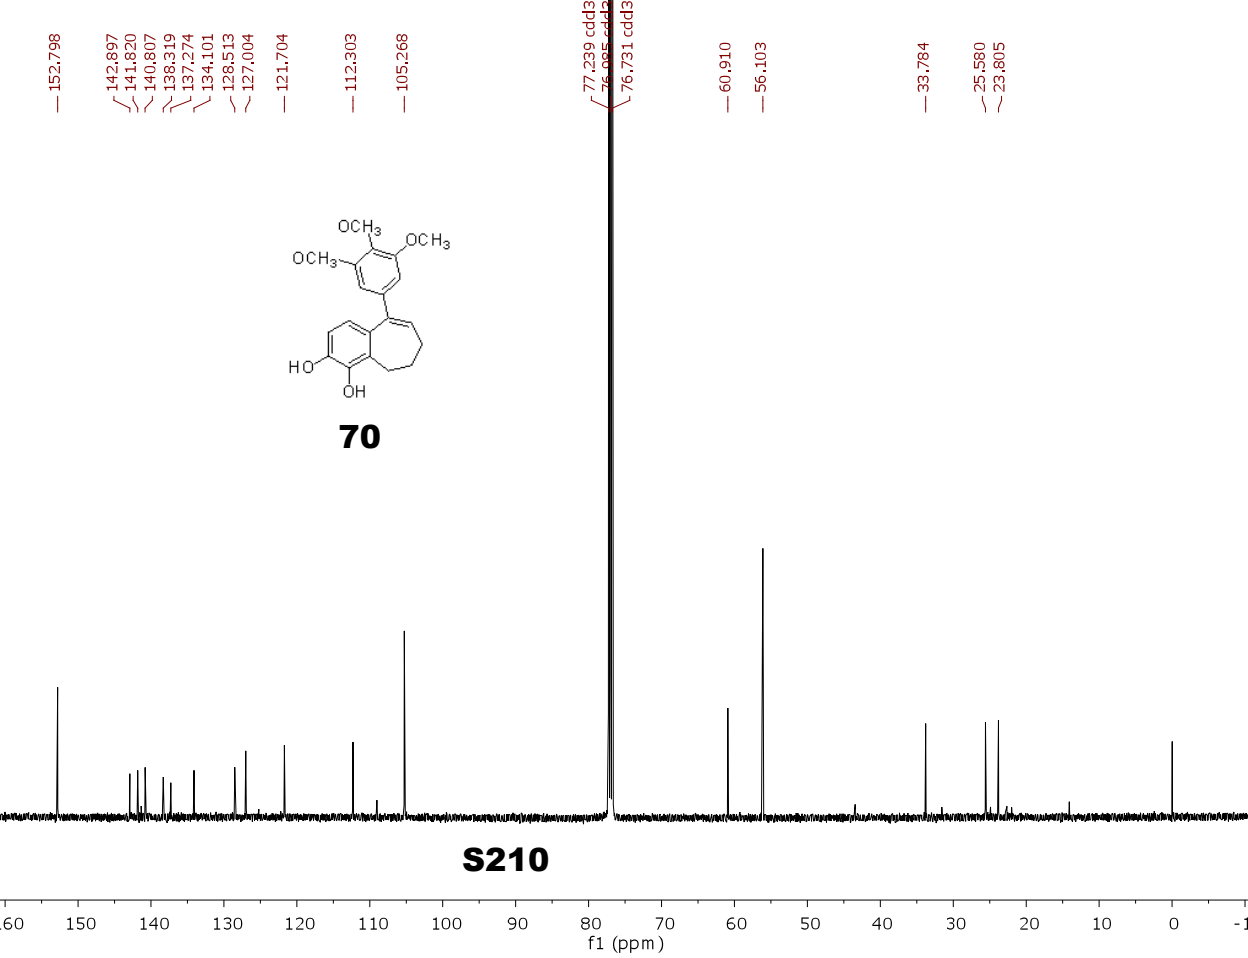

**HPLC for compound 70**

=====

Acq. Operator : Laxman  
Acq. Instrument : Instrument 1 Location : -  
Injection Date : 9/12/2014 2:43:59 PM  
Acq. Method : C:\CHEM32\1\METHODS\MASTERMETHOD.M  
Last changed : 9/12/2014 2:31:31 PM by Laxman  
Analysis Method : C:\CHEM32\1\DATA\LAXMAN\LD-VI-7300001.D\DA.M (MASTERMETHOD.M)  
Last changed : 9/12/2014 5:02:51 PM by Eric Lin  
Sample Info : Method-Mastermethod

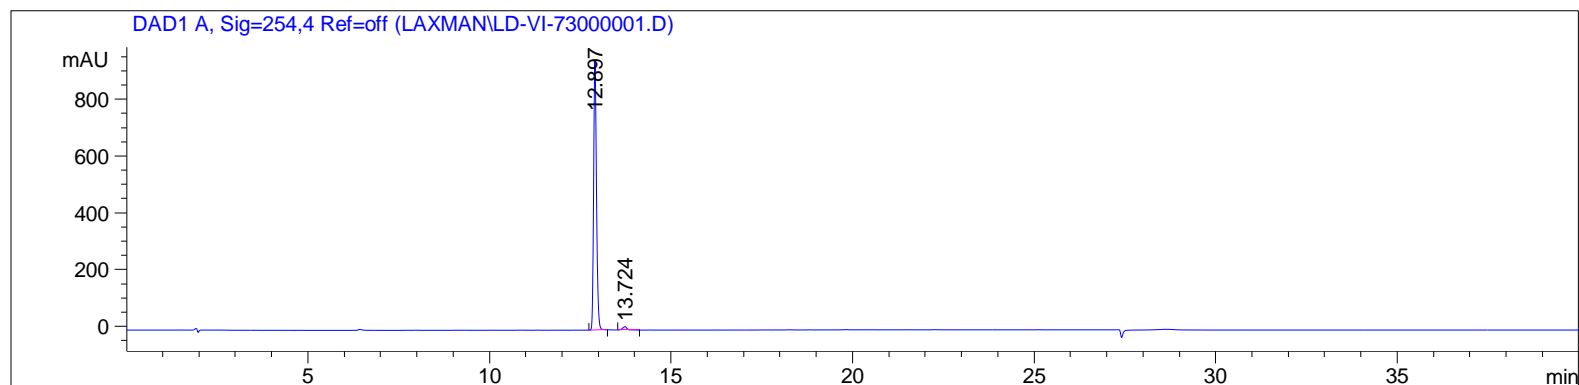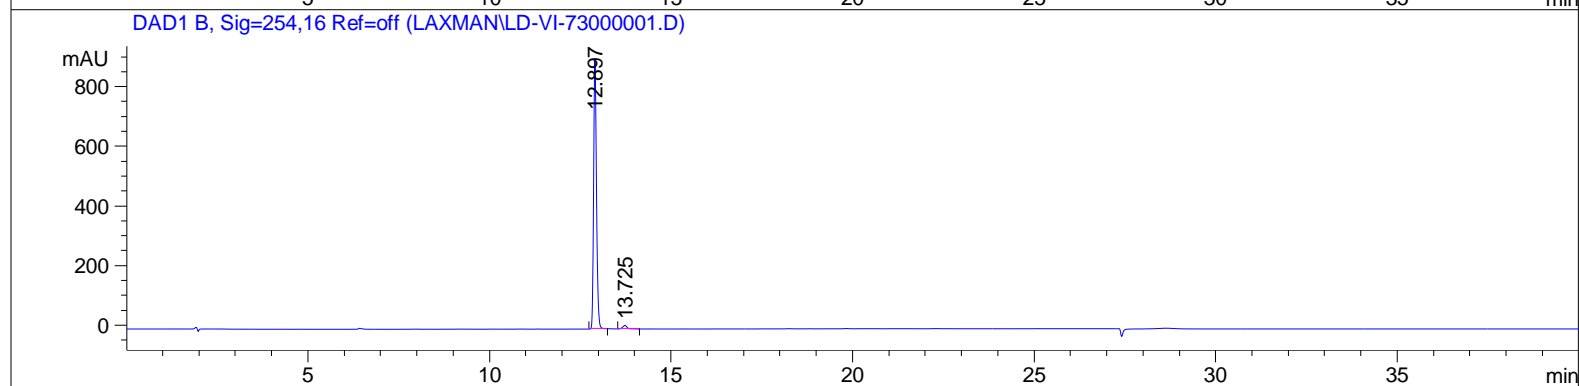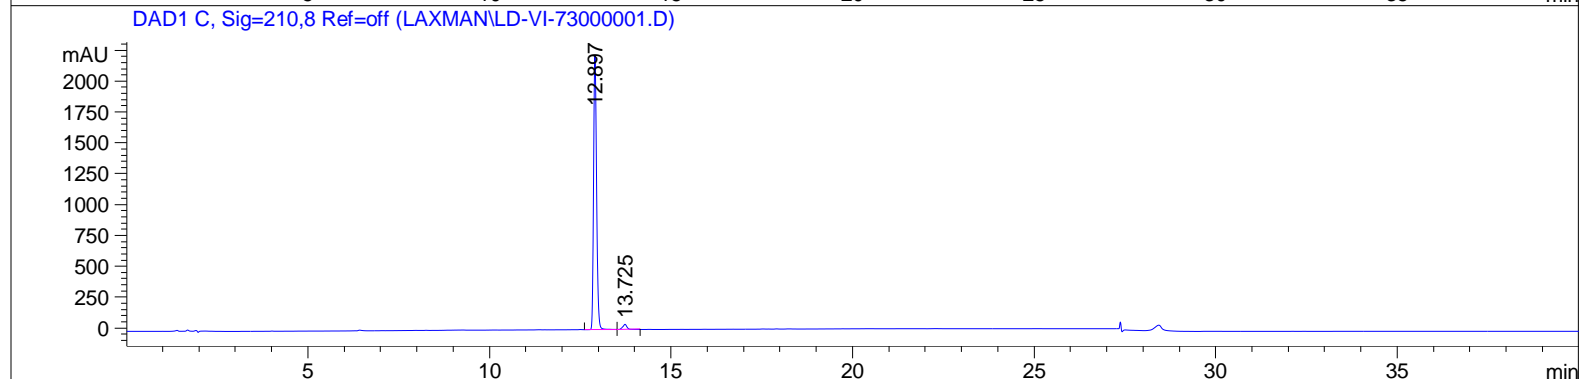**S211**

Sample Name: LD-VI-73-1A-run1

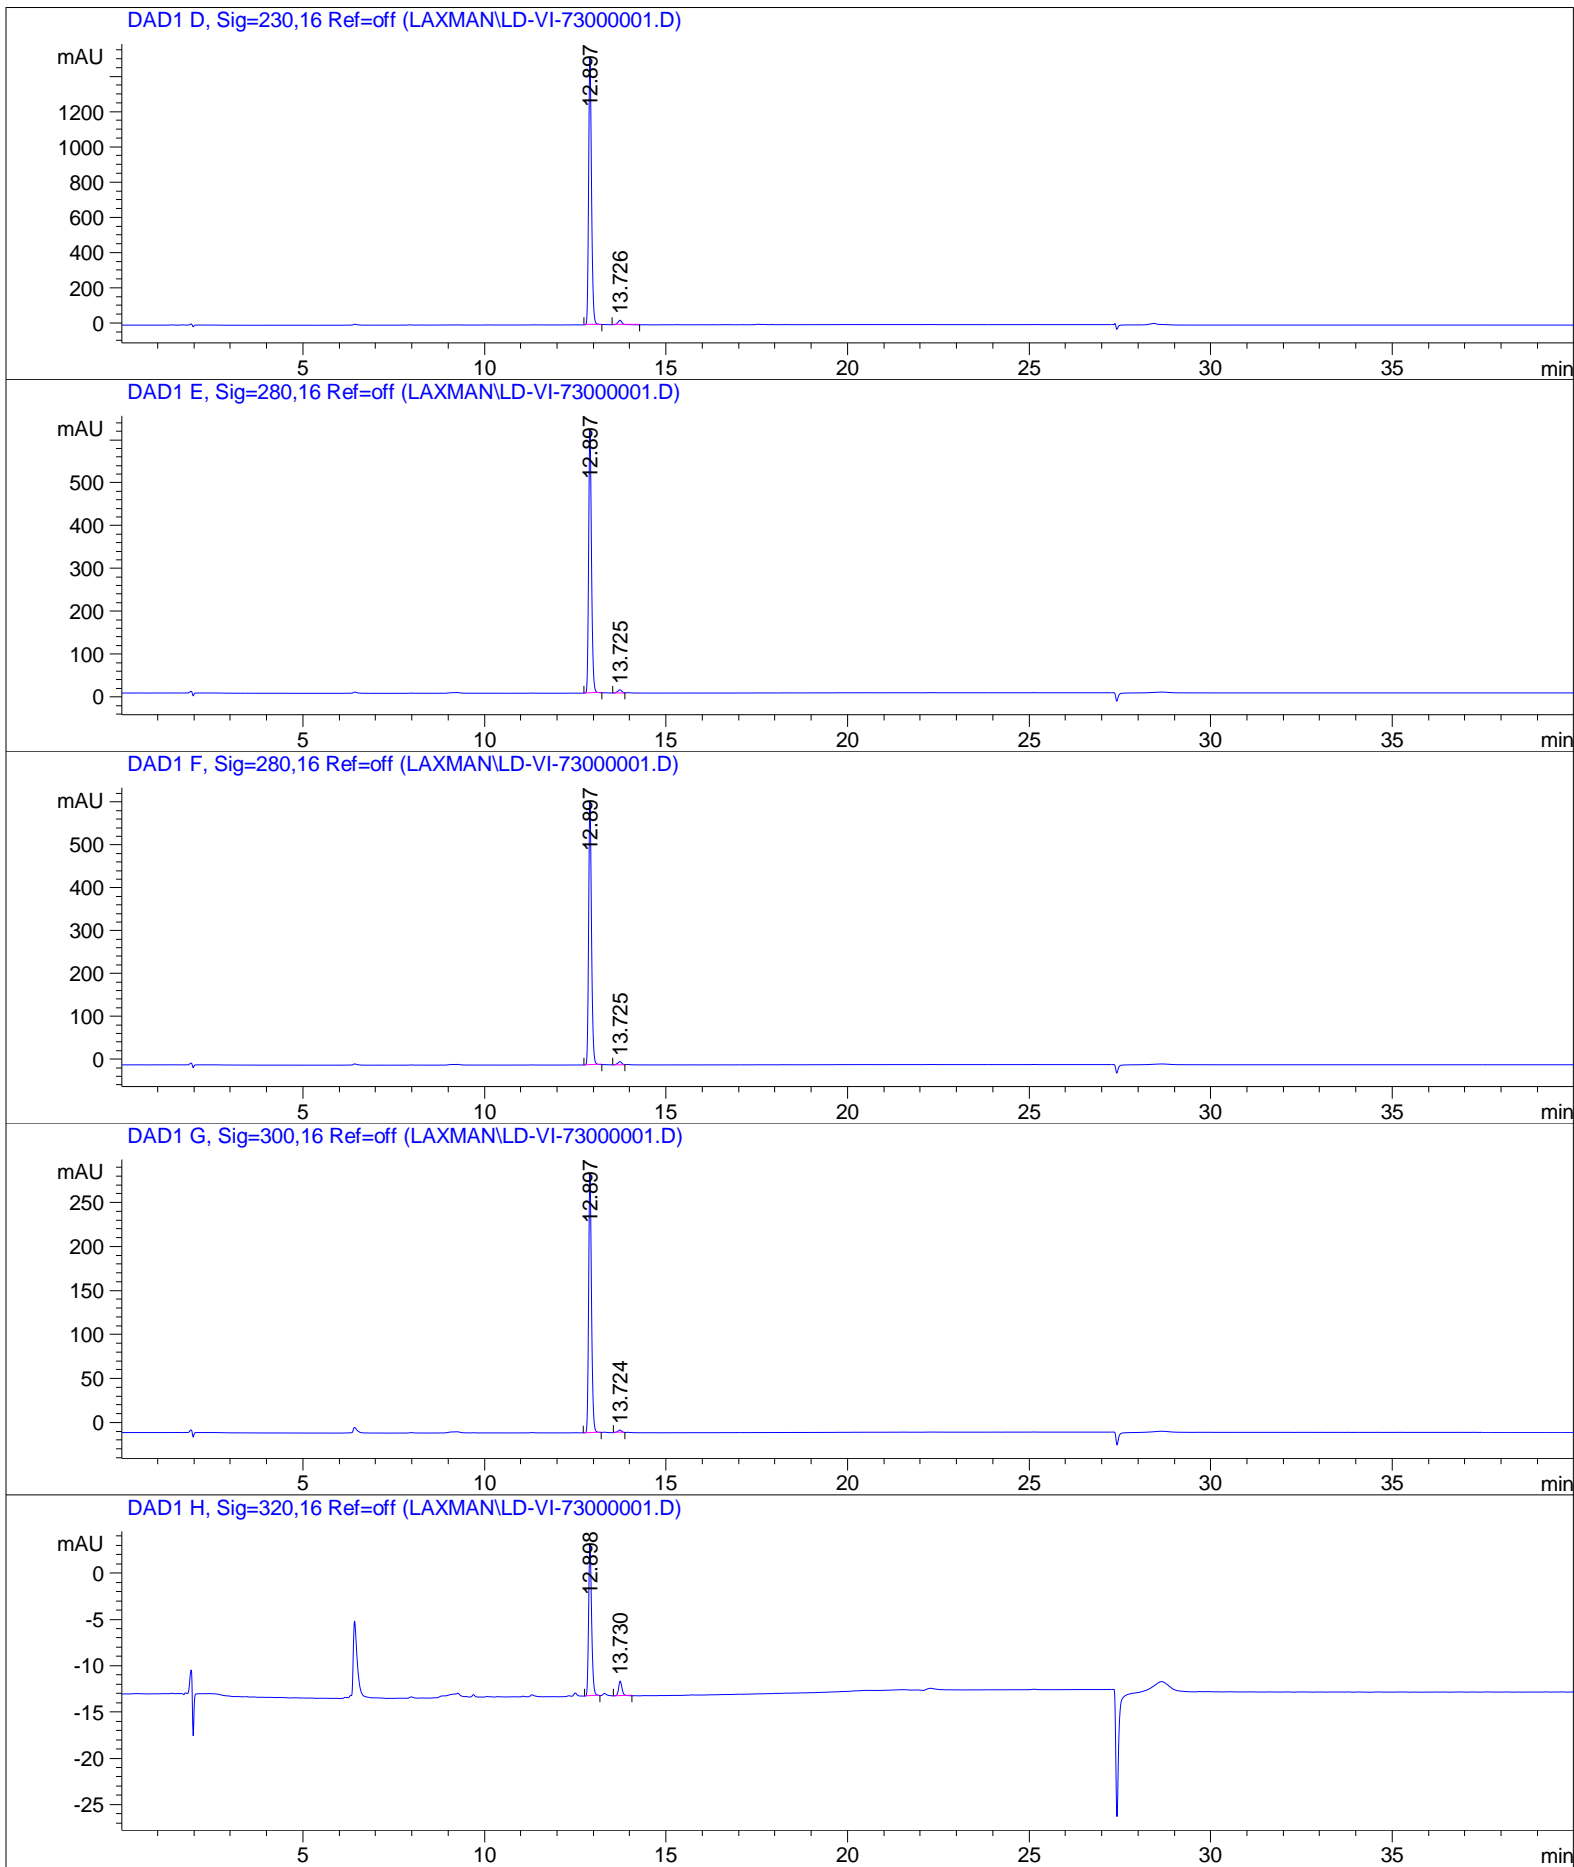

=====  
Area Percent Report  
=====

Sorted By : Signal  
Multiplier : 1.0000  
Dilution : 1.0000  
Use Multiplier & Dilution Factor with ISTDs

Signal 1: DAD1 A, Sig=254,4 Ref=off

| Peak # | RetTime [min] | Type | Width [min] | Area [mAU*s] | Height [mAU] | Area %  |
|--------|---------------|------|-------------|--------------|--------------|---------|
| 1      | 12.897        | BB   | 0.0842      | 5219.16211   | 948.45355    | 98.1260 |
| 2      | 13.724        | BB   | 0.1178      | 99.67384     | 11.89176     | 1.8740  |

Totals : 5318.83595 960.34531

Signal 2: DAD1 B, Sig=254,16 Ref=off

| Peak # | RetTime [min] | Type | Width [min] | Area [mAU*s] | Height [mAU] | Area %  |
|--------|---------------|------|-------------|--------------|--------------|---------|
| 1      | 12.897        | BB   | 0.0842      | 4968.39111   | 902.85382    | 98.0270 |
| 2      | 13.725        | BB   | 0.1175      | 100.00153    | 11.96880     | 1.9730  |

Totals : 5068.39264 914.82262

Signal 3: DAD1 C, Sig=210,8 Ref=off

| Peak # | RetTime [min] | Type | Width [min] | Area [mAU*s] | Height [mAU] | Area %  |
|--------|---------------|------|-------------|--------------|--------------|---------|
| 1      | 12.897        | BV   | 0.0898      | 1.29026e4    | 2218.69849   | 97.3838 |
| 2      | 13.725        | VB   | 0.1184      | 346.62473    | 41.94163     | 2.6162  |

Totals : 1.32492e4 2260.64012

Signal 4: DAD1 D, Sig=230,16 Ref=off

| Peak # | RetTime [min] | Type | Width [min] | Area [mAU*s] | Height [mAU] | Area %  |
|--------|---------------|------|-------------|--------------|--------------|---------|
| 1      | 12.897        | BB   | 0.0850      | 8459.47461   | 1519.36890   | 97.5900 |
| 2      | 13.726        | BB   | 0.1176      | 208.90370    | 25.50353     | 2.4100  |

Sample Name: LD-VI-73-1A-run1

| Peak #   | RetTime [min] | Type | Width [min] | Area [mAU*s] | Height [mAU] | Area % |
|----------|---------------|------|-------------|--------------|--------------|--------|
| Totals : |               |      |             | 8668.37831   | 1544.87242   |        |

Signal 5: DAD1 E, Sig=280,16 Ref=off

| Peak #   | RetTime [min] | Type | Width [min] | Area [mAU*s] | Height [mAU] | Area %  |
|----------|---------------|------|-------------|--------------|--------------|---------|
| 1        | 12.897        | BB   | 0.0842      | 3387.88330   | 615.90149    | 98.2865 |
| 2        | 13.725        | BV   | 0.1117      | 59.06462     | 7.51596      | 1.7135  |
| Totals : |               |      |             | 3446.94792   | 623.41745    |         |

Signal 6: DAD1 F, Sig=280,16 Ref=off

| Peak #   | RetTime [min] | Type | Width [min] | Area [mAU*s] | Height [mAU] | Area %  |
|----------|---------------|------|-------------|--------------|--------------|---------|
| 1        | 12.897        | BB   | 0.0842      | 3387.88477   | 615.90149    | 98.2865 |
| 2        | 13.725        | BV   | 0.1137      | 59.06182     | 7.51595      | 1.7135  |
| Totals : |               |      |             | 3446.94659   | 623.41744    |         |

Signal 7: DAD1 G, Sig=300,16 Ref=off

| Peak #   | RetTime [min] | Type | Width [min] | Area [mAU*s] | Height [mAU] | Area %  |
|----------|---------------|------|-------------|--------------|--------------|---------|
| 1        | 12.897        | BV   | 0.0844      | 1630.89148   | 295.33459    | 98.6910 |
| 2        | 13.724        | BB   | 0.1092      | 21.63143     | 2.82855      | 1.3090  |
| Totals : |               |      |             | 1652.52291   | 298.16315    |         |

Signal 8: DAD1 H, Sig=320,16 Ref=off

| Peak #   | RetTime [min] | Type | Width [min] | Area [mAU*s] | Height [mAU] | Area %  |
|----------|---------------|------|-------------|--------------|--------------|---------|
| 1        | 12.898        | BB   | 0.0895      | 94.41895     | 16.31277     | 90.0631 |
| 2        | 13.730        | BB   | 0.0986      | 10.41746     | 1.58729      | 9.9369  |
| Totals : |               |      |             | 104.83641    | 17.90006     |         |

=====  
\*\*\* End of Report \*\*\*

# HRMS for Compound 70

NL:  
1.18E8  
LD-III-71-1A\_Orbo  
+ES#10 RT: 0.09 AV:  
1 T: FTMS + p ESI  
sid=35.00 Full ms  
[100.00-1000.00]

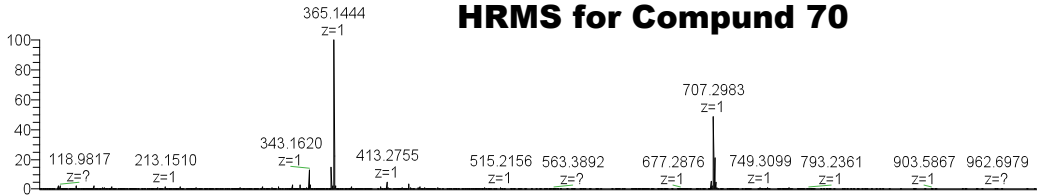

NL:  
7.95E5  
C<sub>20</sub>H<sub>22</sub>O<sub>5</sub>:  
C<sub>20</sub>H<sub>22</sub>O<sub>5</sub>  
pa Chrg 1

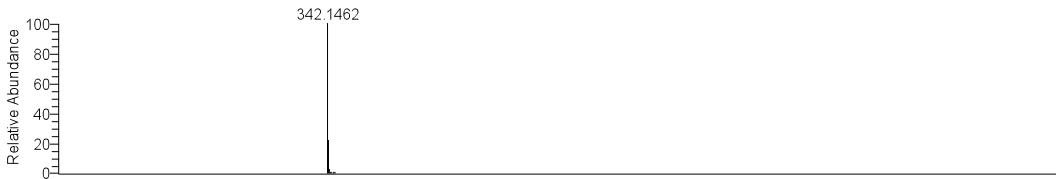

NL:  
7.95E5  
C<sub>20</sub>H<sub>22</sub>O<sub>5</sub>+H:  
C<sub>20</sub>H<sub>23</sub>O<sub>5</sub>  
pa Chrg 1

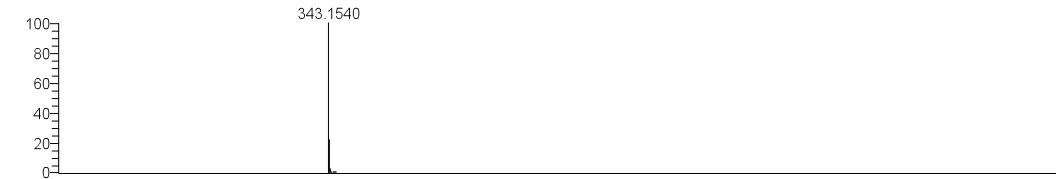

NL:  
7.95E5  
C<sub>20</sub>H<sub>22</sub>O<sub>5</sub>+Na:  
C<sub>20</sub>H<sub>22</sub>O<sub>5</sub>Na<sub>1</sub>  
pa Chrg 1

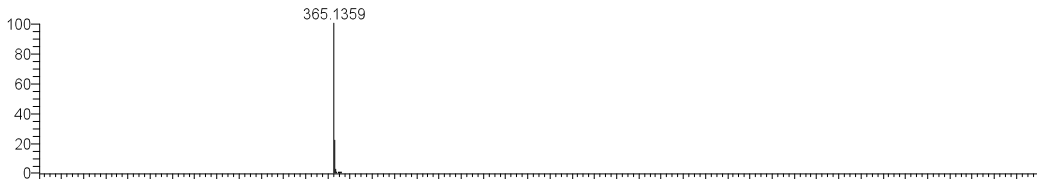

**S216** m/z



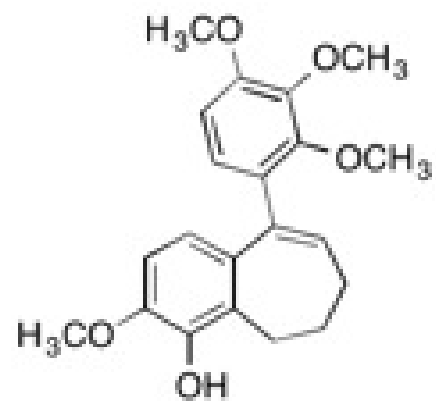

**71**

6.923  
6.906  
6.645  
6.628  
6.617  
6.600  
6.389  
6.372  
6.130  
6.116  
6.101  
5.705

3.866  
3.853  
3.823

3.421

2.883  
2.869  
2.855

2.177  
2.163  
2.149  
2.135  
2.121  
1.991  
1.977  
1.963  
1.948

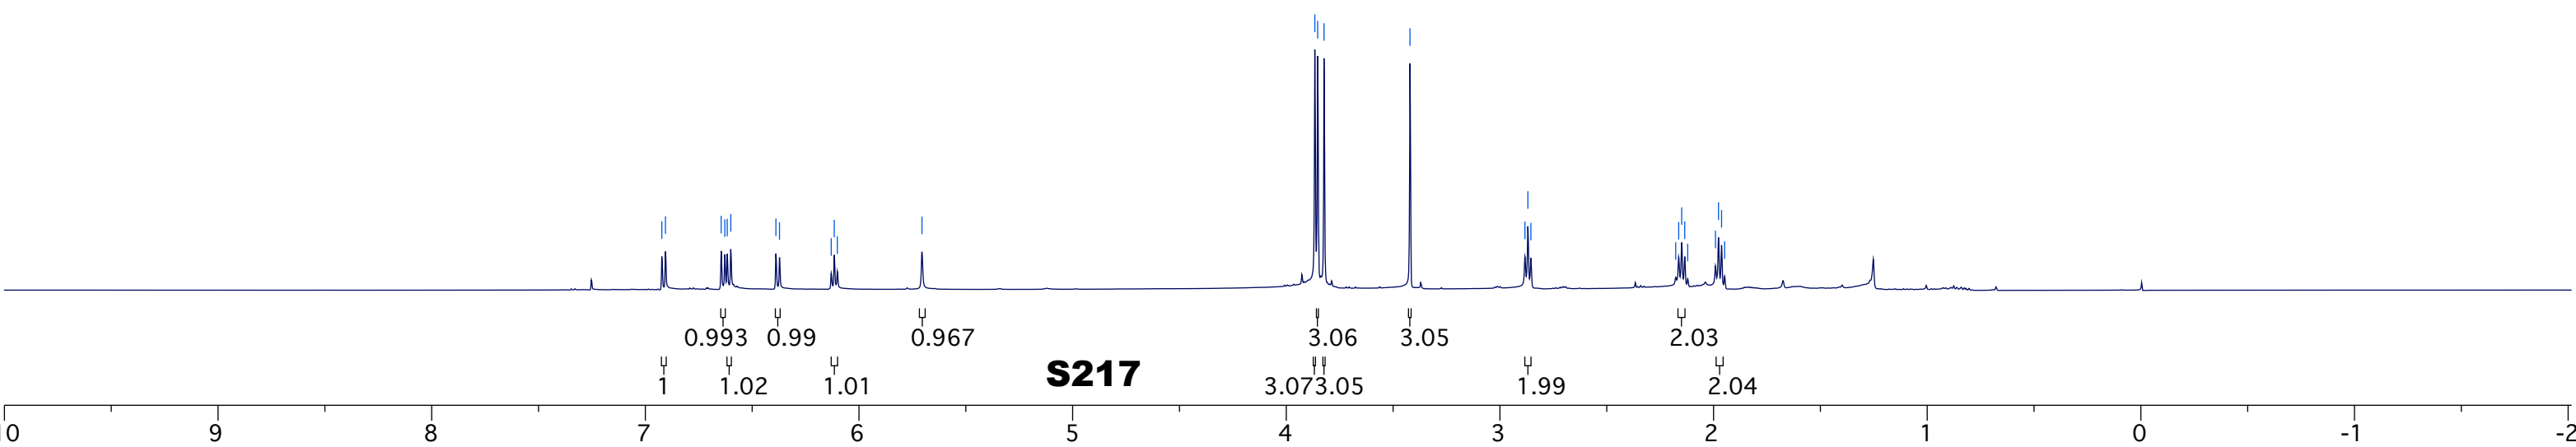

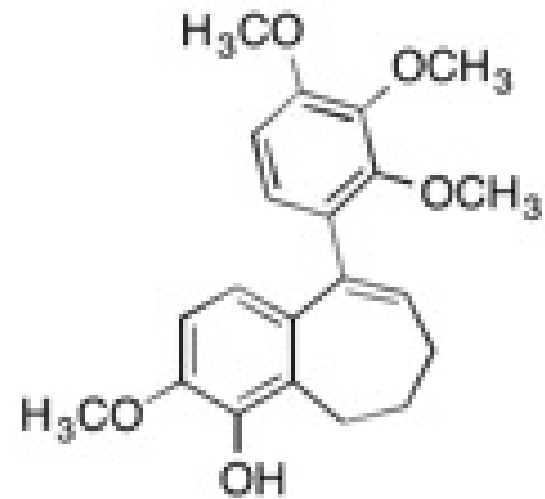

**71**

153.038  
151.752  
144.668  
142.390  
142.368  
139.993  
136.245  
130.950  
128.561  
126.813  
125.000  
119.014  
107.257  
106.624  
60.694  
60.461  
55.938  
55.860  
33.606  
25.586  
23.436

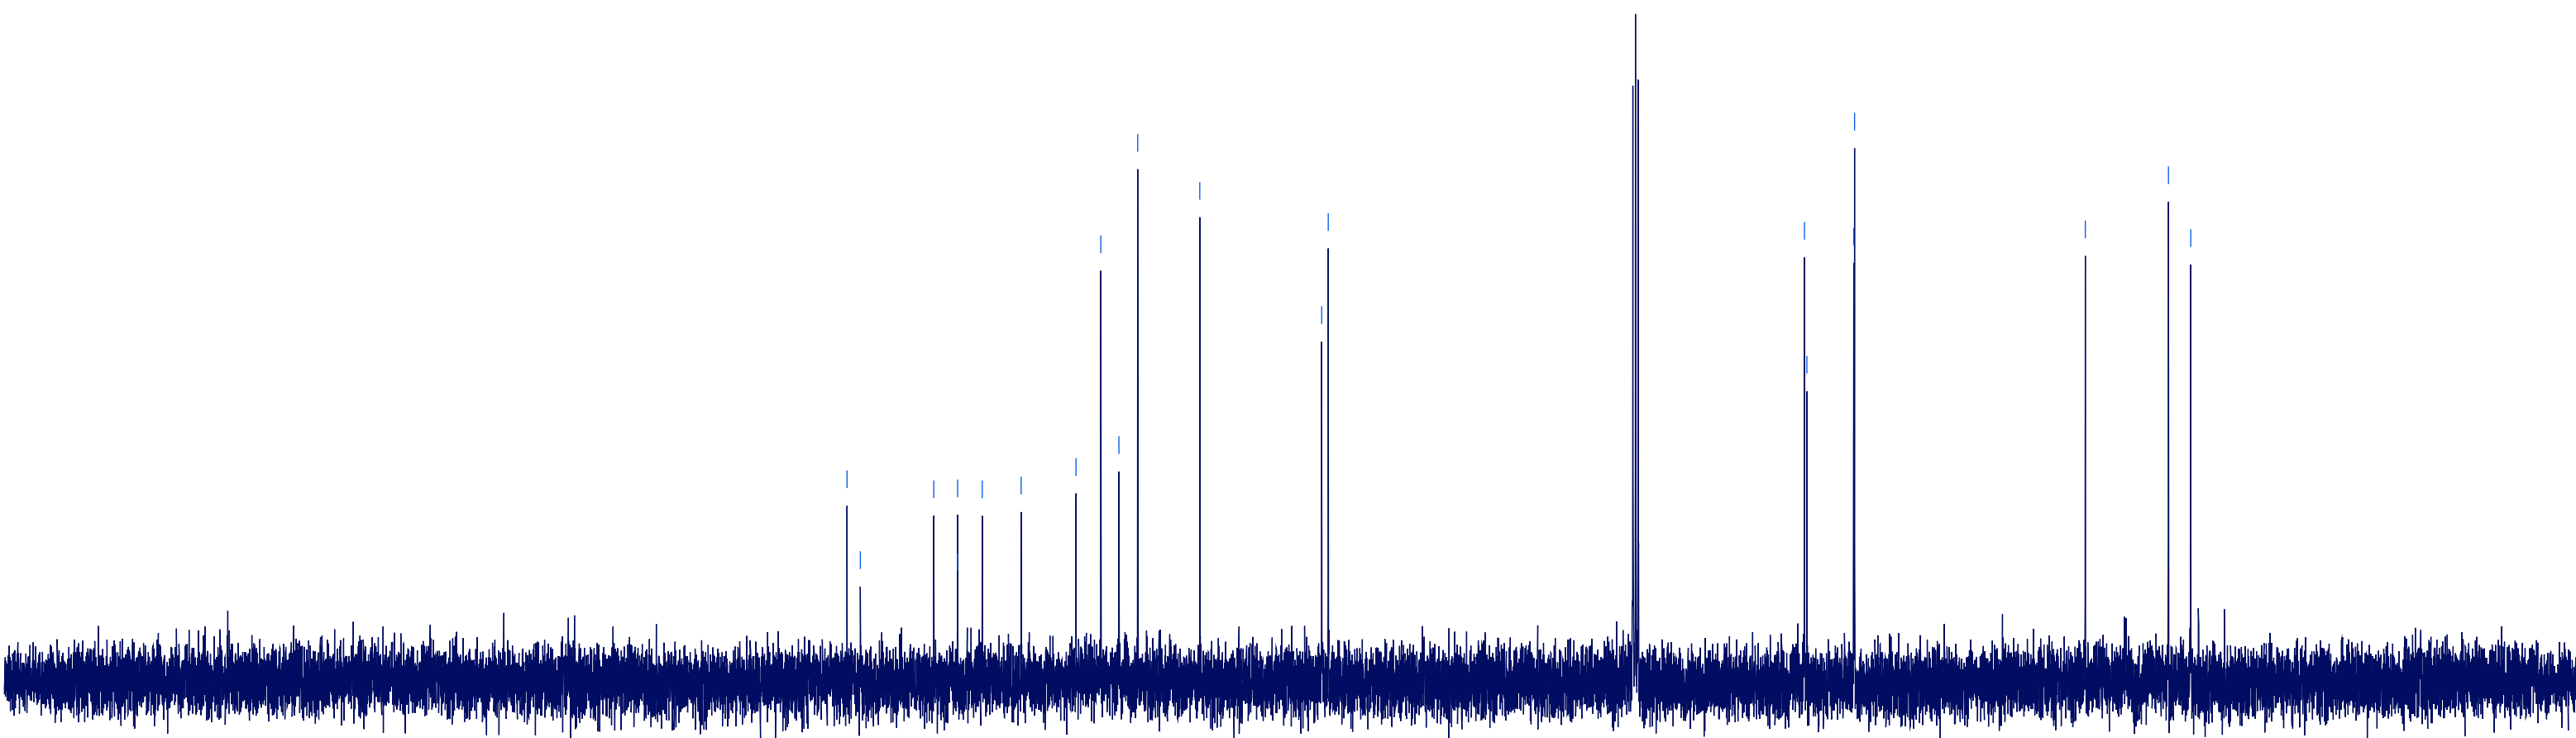

**S218**

230 220 210 200 190 180 170 160 150 140 130 120 110 100 90 80 70 60 50 40 30 20 10 0 -10

# HPLC of compound 71

=====  
Acq. Operator : Christine  
Acq. Instrument : Instrument 1 Location : -  
Injection Date : 5/19/2014 11:07:23 AM  
Acq. Method : C:\CHEM32\1\METHODS\MASTERMETHOD.M  
Last changed : 5/19/2014 10:53:24 AM by Christine  
Analysis Method : C:\CHEM32\1\DATA\CHRISTINE\TG\_1\_86000001.D\DA.M (MASTERMETHOD.M)  
Last changed : 5/19/2014 12:11:57 PM by Christine

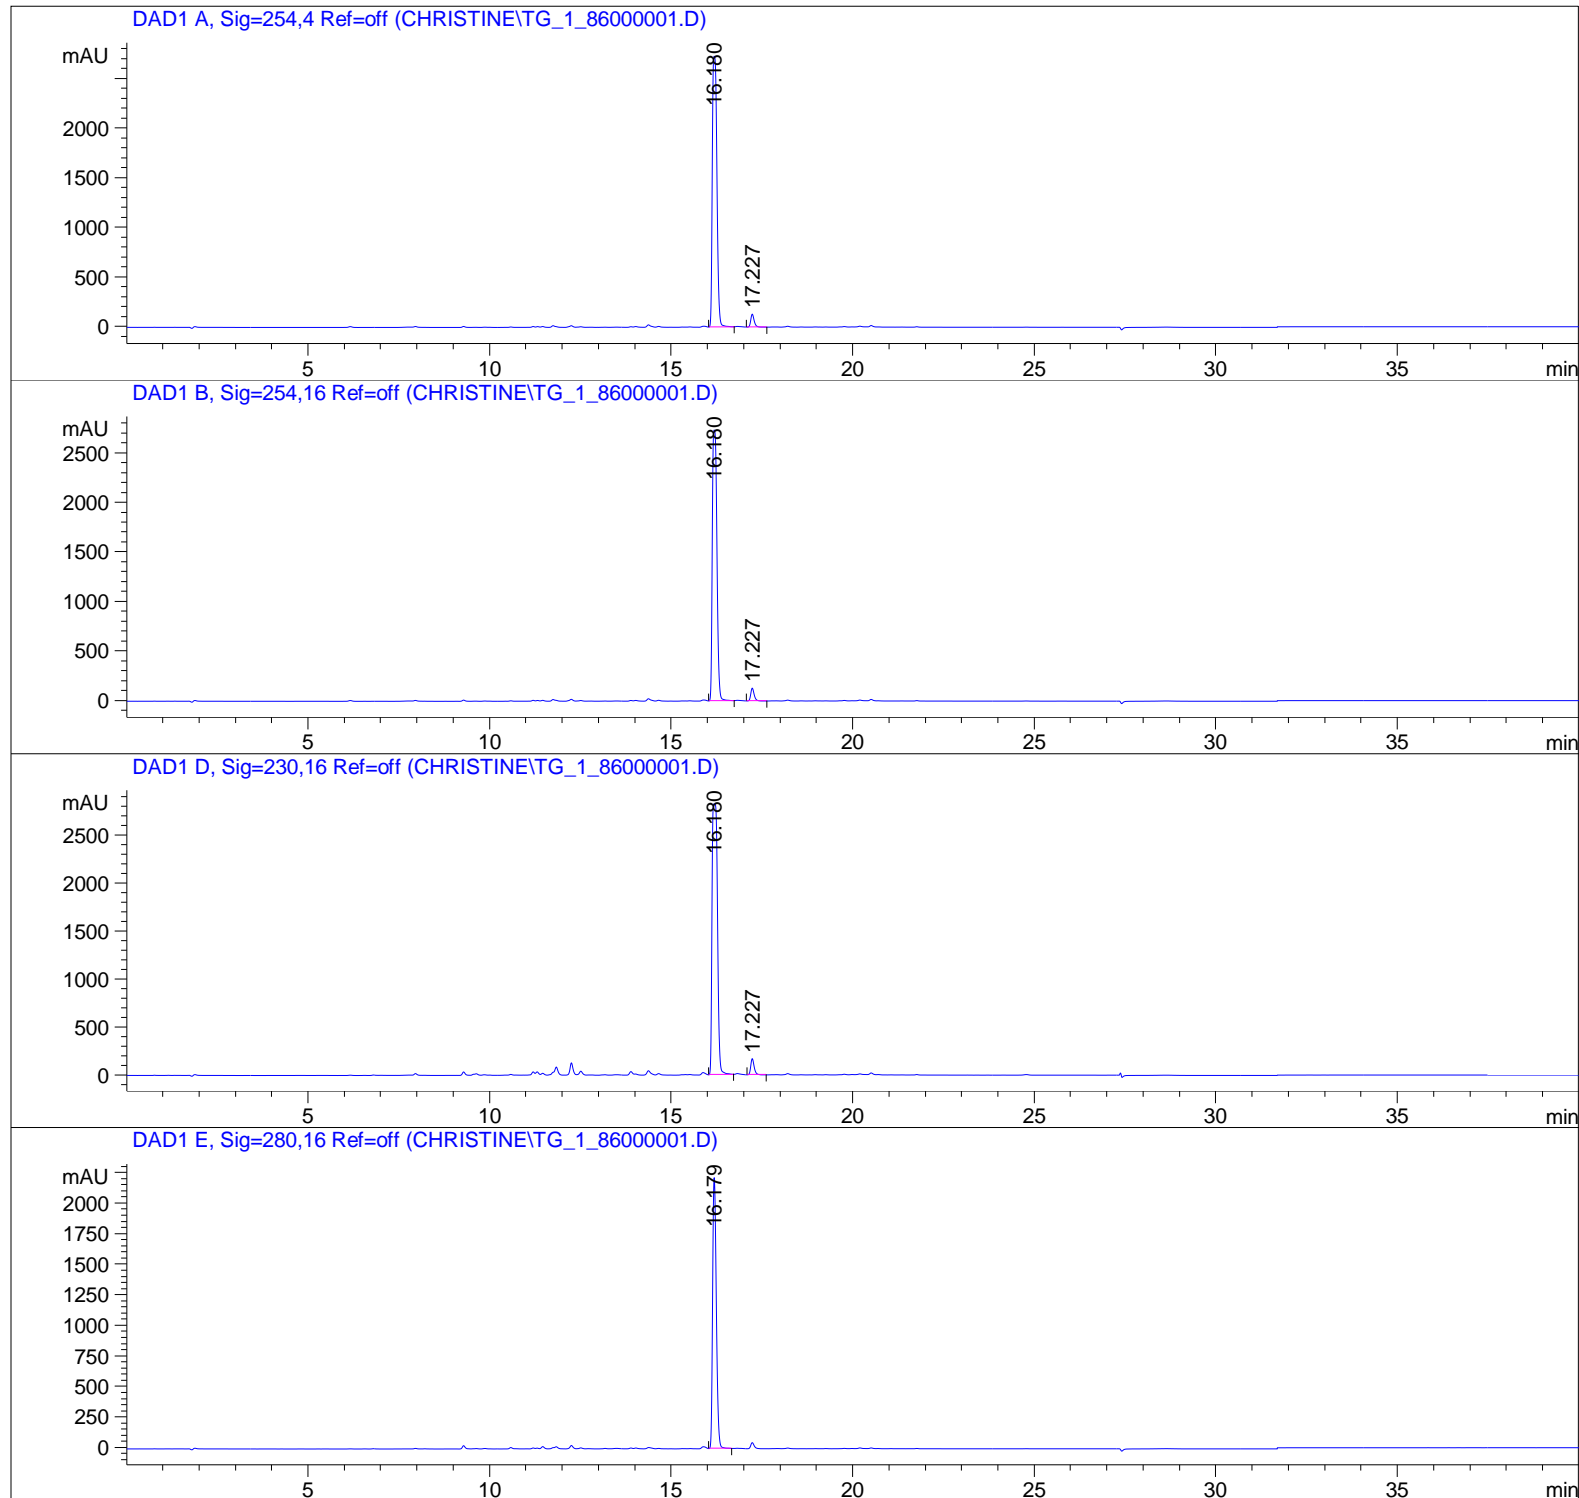

Sample Name: TG\_1\_86

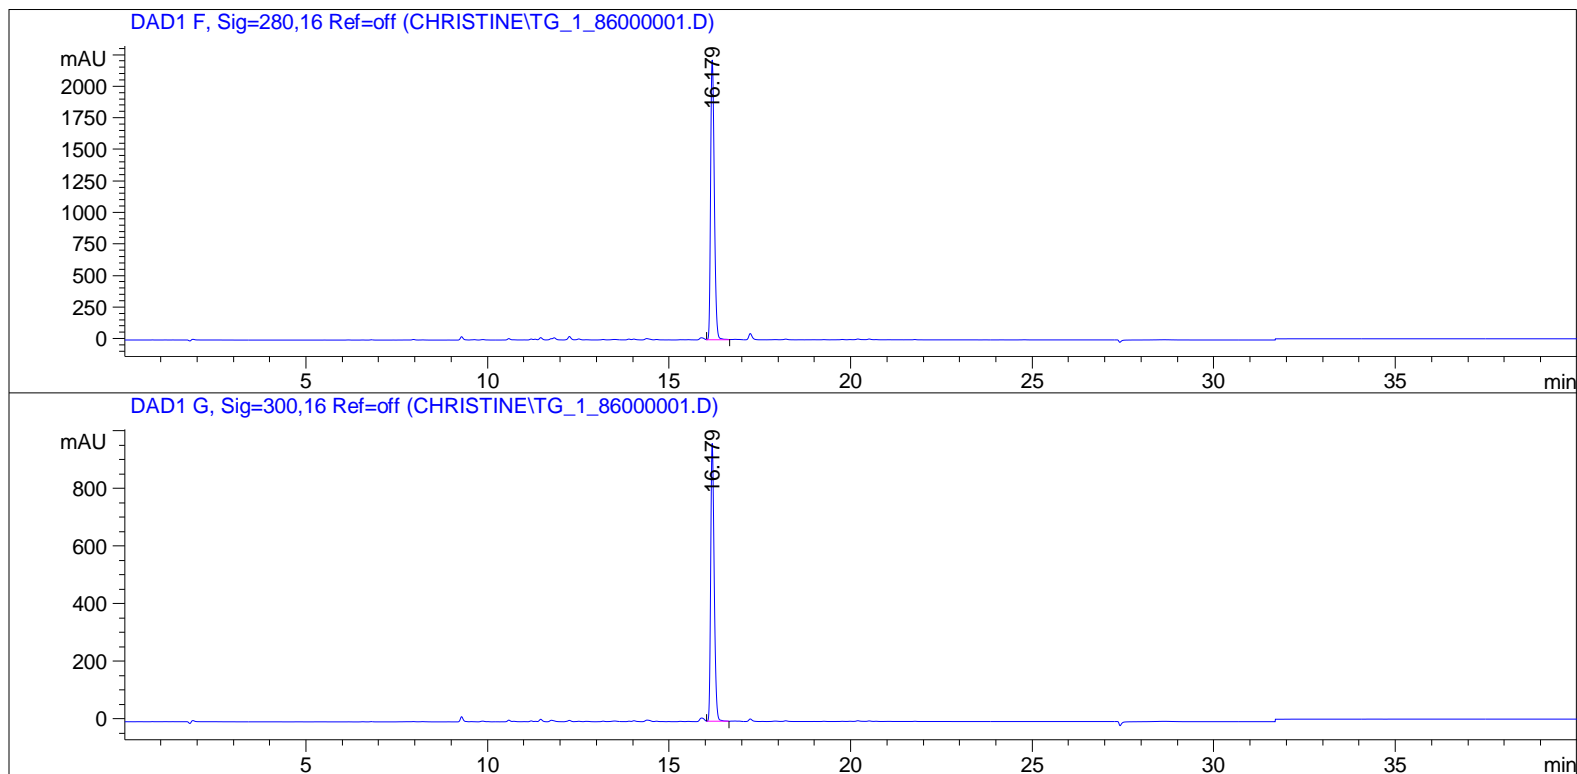

```
=====
                          Area Percent Report
=====
```

```
Sorted By           :      Signal
Multiplier          :      1.0000
Dilution           :      1.0000
Use Multiplier & Dilution Factor with ISTDs
```

Signal 1: DAD1 A, Sig=254,4 Ref=off

| Peak # | RetTime [min] | Type | Width [min] | Area [mAU*s] | Height [mAU] | Area %  |
|--------|---------------|------|-------------|--------------|--------------|---------|
| 1      | 16.180        | VV   | 0.1421      | 2.38945e4    | 2730.56470   | 96.5205 |
| 2      | 17.227        | VB   | 0.1009      | 861.36761    | 130.67624    | 3.4795  |

```
Totals :                2.47558e4  2861.24094
```

Signal 2: DAD1 B, Sig=254,16 Ref=off

| Peak # | RetTime [min] | Type | Width [min] | Area [mAU*s] | Height [mAU] | Area %  |
|--------|---------------|------|-------------|--------------|--------------|---------|
| 1      | 16.180        | VV   | 0.1423      | 2.39879e4    | 2735.90332   | 96.5594 |
| 2      | 17.227        | VB   | 0.1008      | 854.72571    | 129.77695    | 3.4406  |

Sample Name: TG\_1\_86

Totals : 2.48426e4 2865.68027

Signal 3: DAD1 D, Sig=230,16 Ref=off

| Peak # | RetTime [min] | Type | Width [min] | Area [mAU*s] | Height [mAU] | Area %  |
|--------|---------------|------|-------------|--------------|--------------|---------|
| 1      | 16.180        | BV   | 0.1687      | 2.92081e4    | 2822.58813   | 96.3796 |
| 2      | 17.227        | BB   | 0.1002      | 1097.15686   | 168.01945    | 3.6204  |

Totals : 3.03053e4 2990.60759

Signal 4: DAD1 E, Sig=280,16 Ref=off

| Peak # | RetTime [min] | Type | Width [min] | Area [mAU*s] | Height [mAU] | Area %   |
|--------|---------------|------|-------------|--------------|--------------|----------|
| 1      | 16.179        | VV   | 0.1104      | 1.57028e4    | 2223.08569   | 100.0000 |

Totals : 1.57028e4 2223.08569

Signal 5: DAD1 F, Sig=280,16 Ref=off

| Peak # | RetTime [min] | Type | Width [min] | Area [mAU*s] | Height [mAU] | Area %   |
|--------|---------------|------|-------------|--------------|--------------|----------|
| 1      | 16.179        | VV   | 0.1104      | 1.57028e4    | 2223.08569   | 100.0000 |

Totals : 1.57028e4 2223.08569

Signal 6: DAD1 G, Sig=300,16 Ref=off

| Peak # | RetTime [min] | Type | Width [min] | Area [mAU*s] | Height [mAU] | Area %   |
|--------|---------------|------|-------------|--------------|--------------|----------|
| 1      | 16.179        | VV   | 0.1017      | 6443.40820   | 967.43469    | 100.0000 |

Totals : 6443.40820 967.43469

```

=====
*** End of Report ***

```

# HRMS of compound 71

C:\Xcalibur...ITG\_1\_86\_ESI\_+Orbi

1/13/2014 1:41:22 PM

TG-1-86

NL:  
7.86E5  
C<sub>21</sub>H<sub>24</sub>O<sub>5</sub>Na:  
C<sub>21</sub>H<sub>24</sub>O<sub>5</sub>Na<sub>1</sub>  
pa Chrg 1

NL:  
7.86E5  
C<sub>21</sub>H<sub>25</sub>O<sub>5</sub>:  
C<sub>21</sub>H<sub>25</sub>O<sub>5</sub>  
pa Chrg 1

NL:  
9.00E7  
TG\_1\_86\_ESI\_+  
Orbi#10 RT: 0.09  
AV: 1 T: FTMS + p  
ESI Full ms  
[200.00-1500.00]

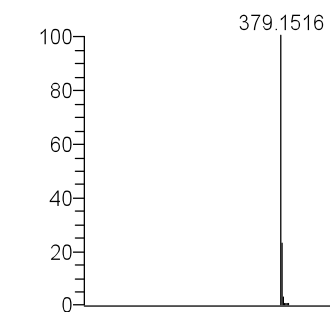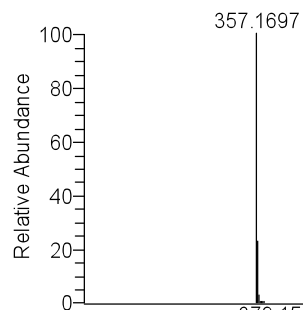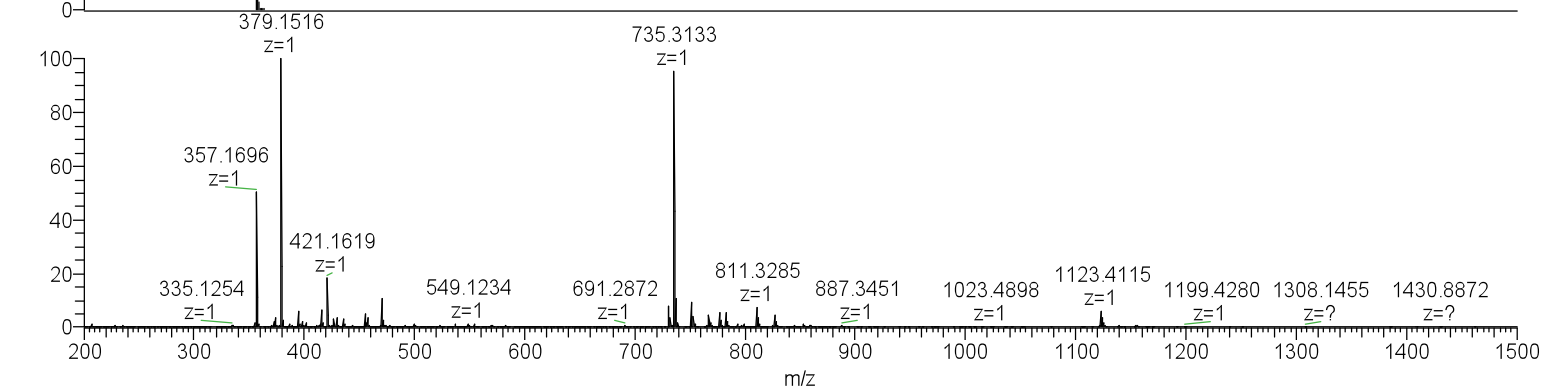

S222

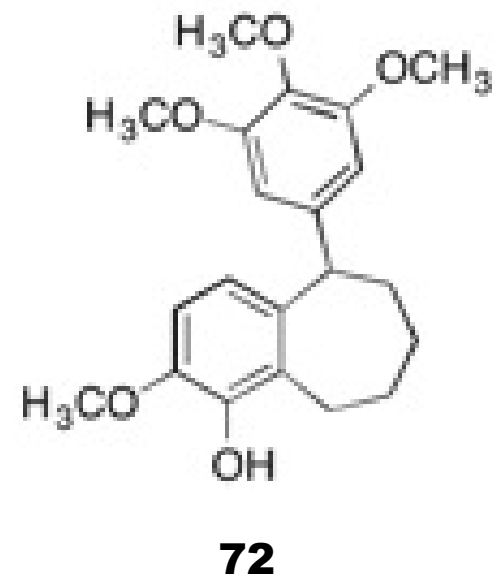

6.551  
 6.534  
 6.470  
 6.183  
 6.167  
 5.841

4.180  
 4.161  
 3.889  
 3.835  
 3.301  
 3.286  
 3.276  
 3.261  
 2.753  
 2.729  
 2.703  
 2.189  
 2.188  
 2.183  
 2.178  
 2.179  
 2.175  
 2.174  
 2.173  
 2.172  
 2.058  
 2.048  
 2.036  
 2.028  
 2.024  
 2.008  
 1.983  
 1.961  
 1.905  
 1.903  
 1.896  
 1.885  
 1.884  
 1.872  
 1.852  
 1.846  
 1.840  
 1.825  
 1.818  
 1.505  
 1.481  
 1.457  
 1.436

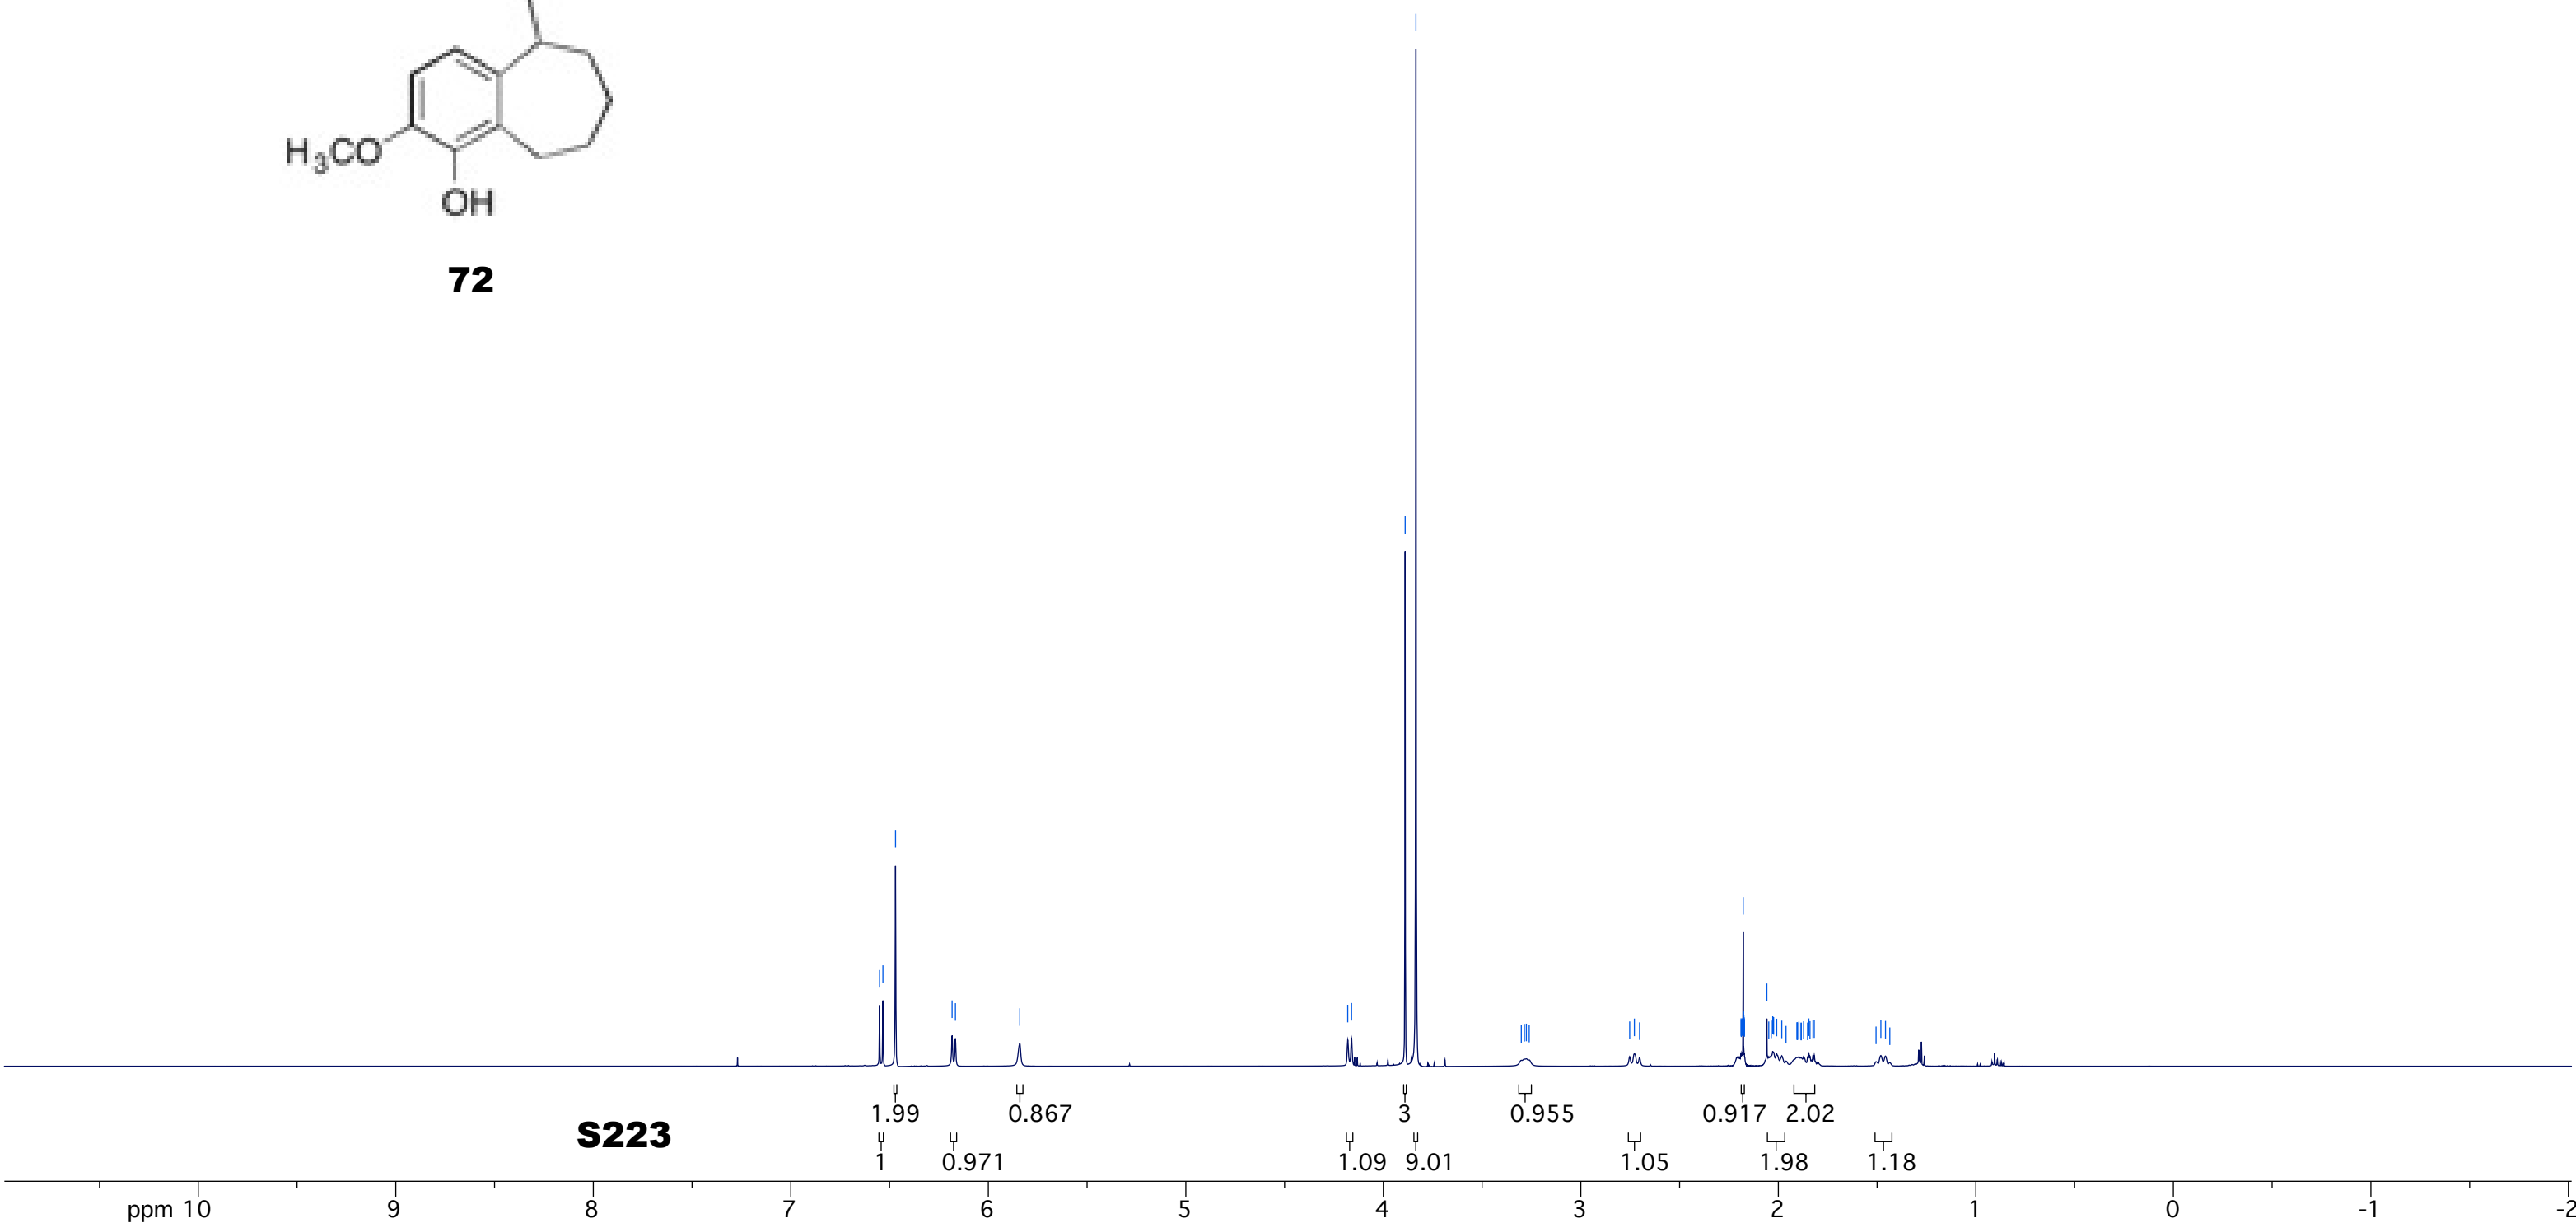

**S223**

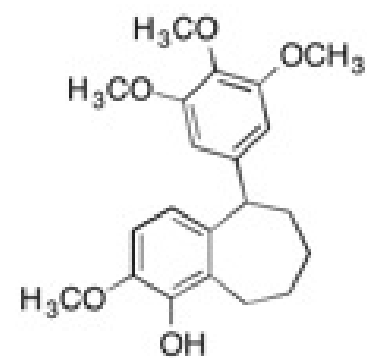

**72**

153.081  
144.696  
142.609  
141.167  
139.647  
136.158  
128.389  
118.565  
107.130  
105.663  
60.873  
56.072  
55.862  
49.535  
34.679  
30.626  
27.194  
25.365

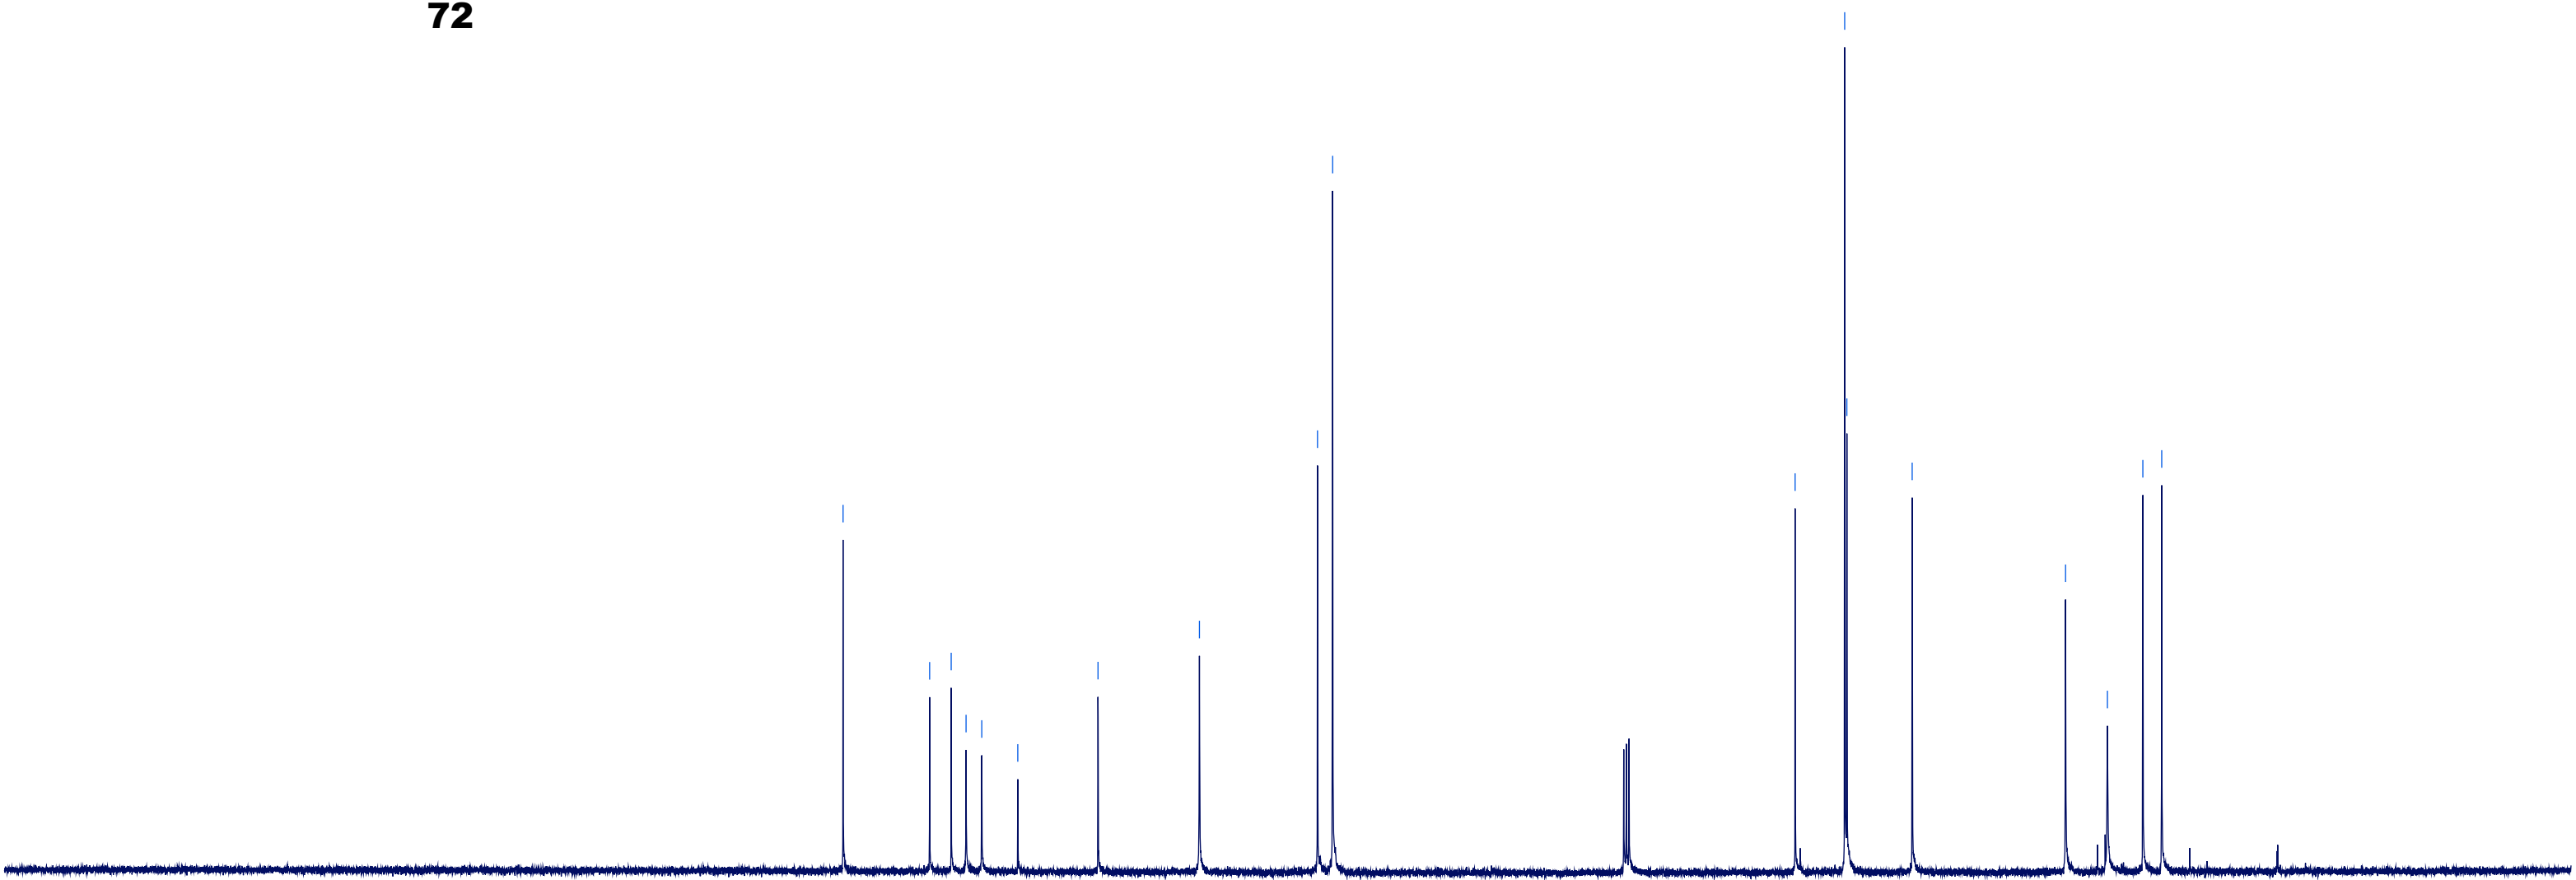

**S224**

230 220 210 200 190 180 170 160 150 140 130 120 110 100 90 80 70 60 50 40 30 20 10 0 -10



# HPLC of compound 72

=====  
Acq. Operator : Christine  
Acq. Instrument : Instrument 1 Location : -  
Injection Date : 6/5/2014 11:26:01 AM  
Acq. Method : C:\CHEM32\1\METHODS\MASTERMETHOD.M  
Last changed : 6/5/2014 11:13:29 AM by Christine  
Analysis Method : C:\CHEM32\1\DATA\CHRISTINE\TG\_1\_112000001.D\DA.M (MASTERMETHOD.M)  
Last changed : 6/10/2014 10:09:52 AM by Eric Lin

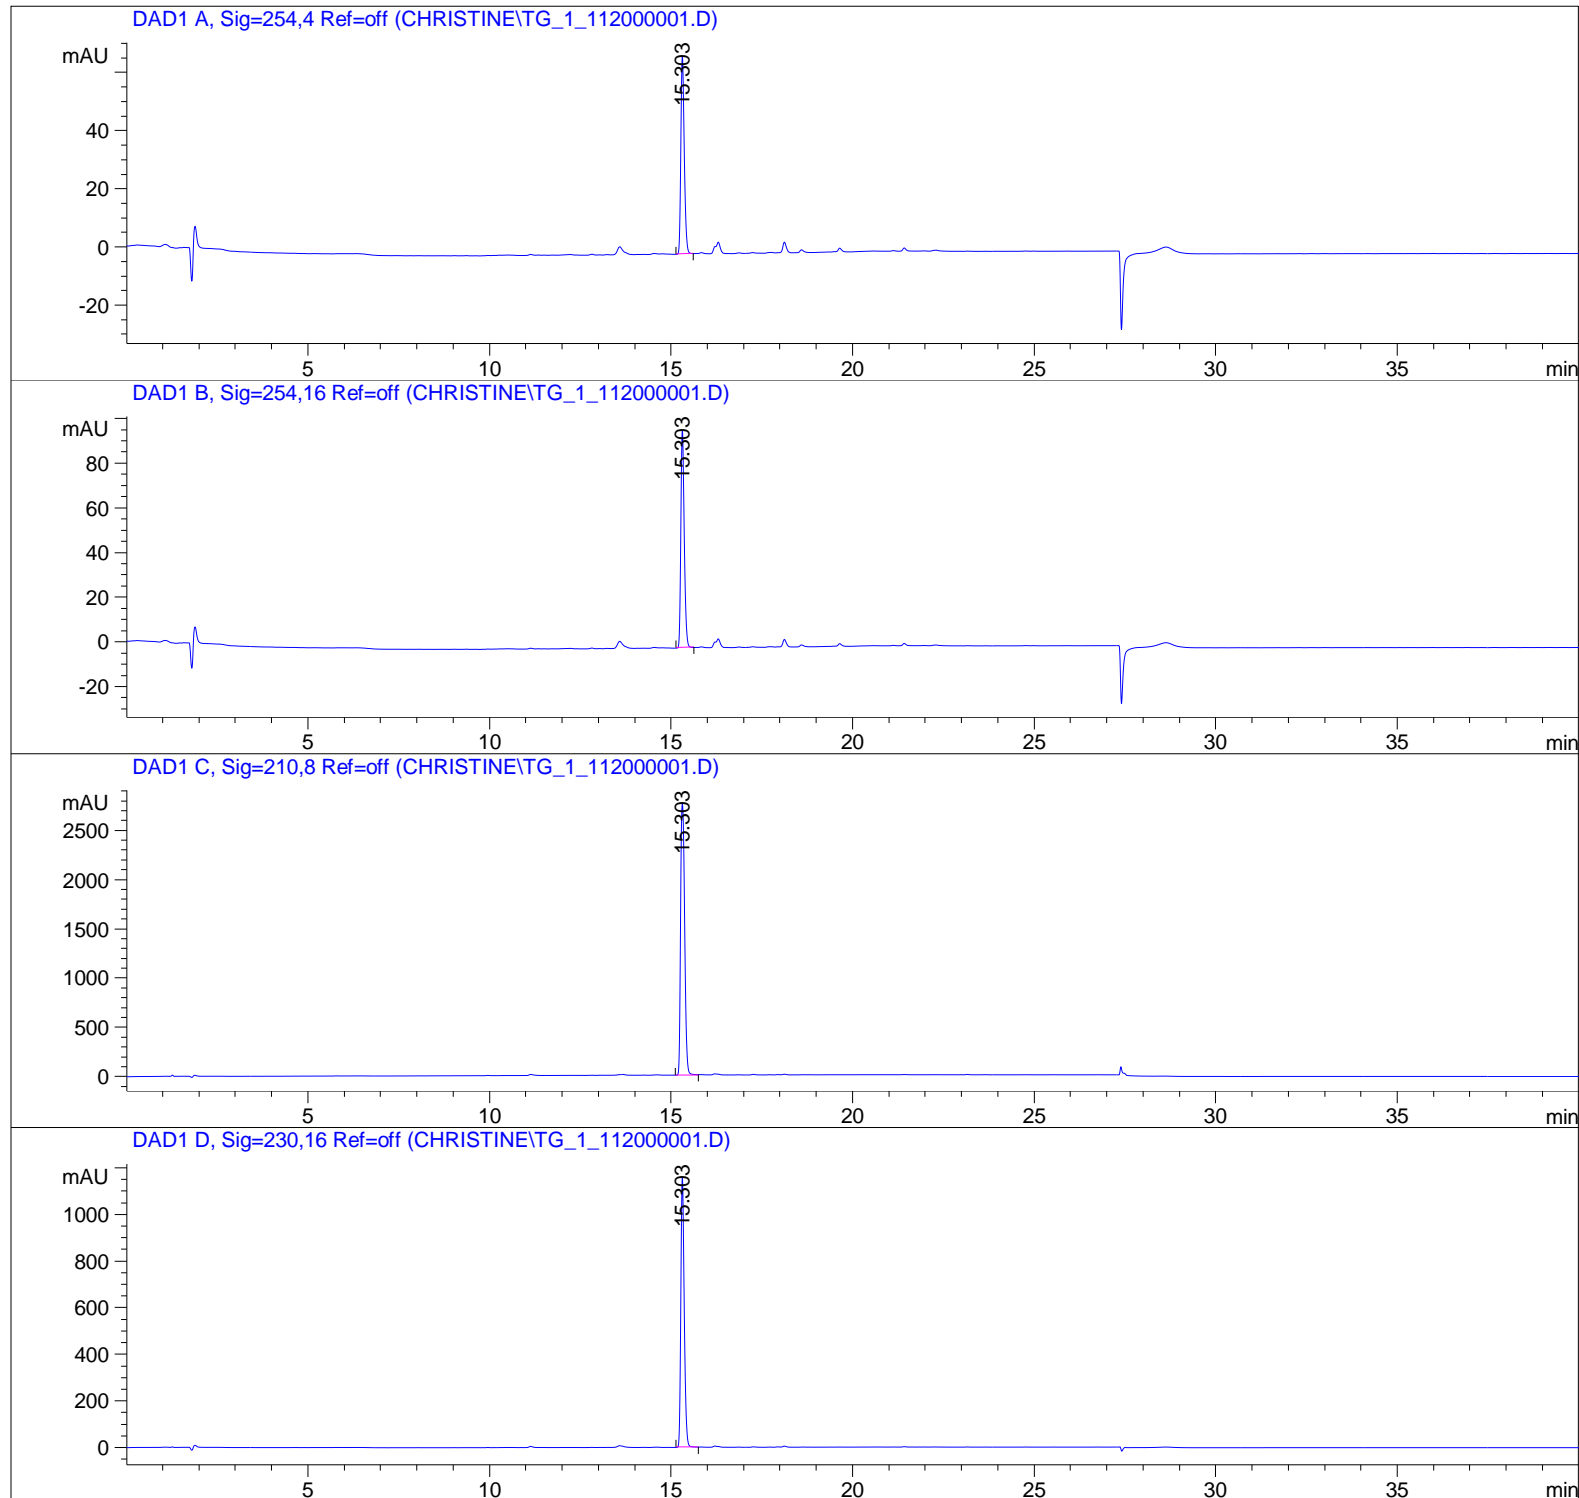

**S225**

Sample Name: TG\_1\_112

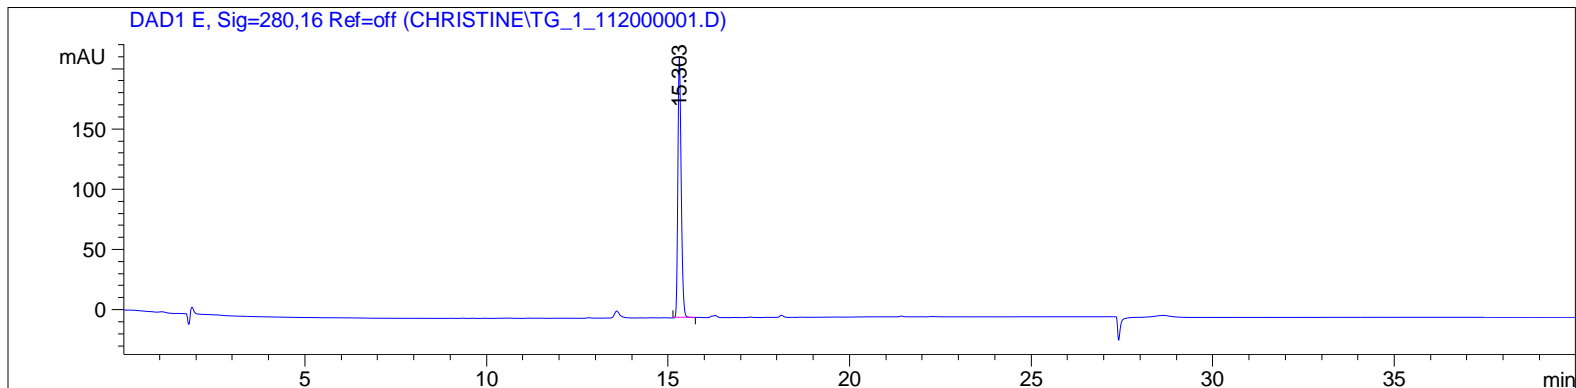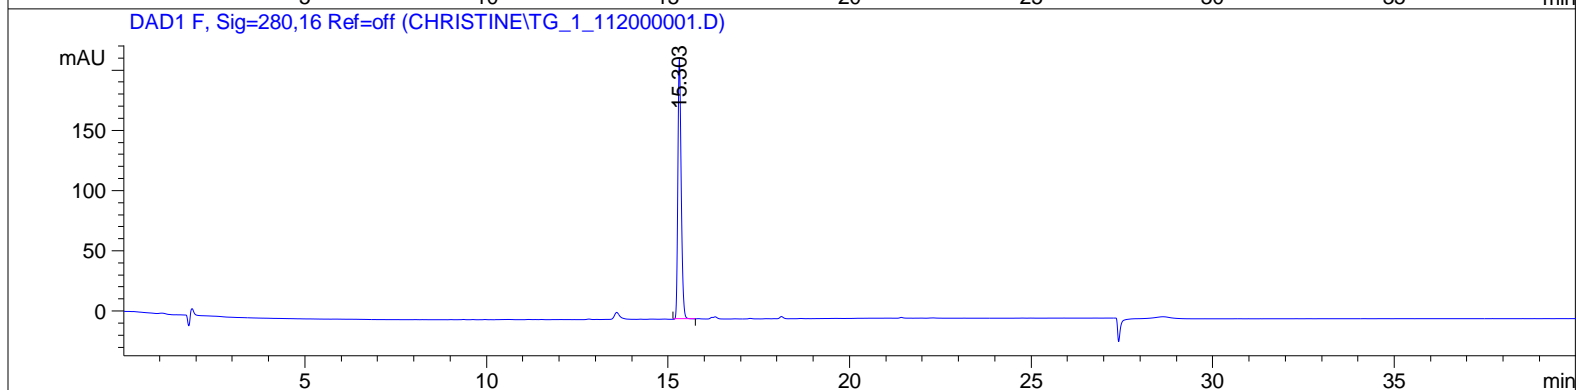

=====  
 Area Percent Report  
 =====

Sorted By : Signal  
 Multiplier : 1.0000  
 Dilution : 1.0000  
 Use Multiplier & Dilution Factor with ISTDs

Signal 1: DAD1 A, Sig=254,4 Ref=off

| Peak # | RetTime [min] | Type | Width [min] | Area [mAU*s] | Height [mAU] | Area %   |
|--------|---------------|------|-------------|--------------|--------------|----------|
| 1      | 15.303        | BB   | 0.1000      | 442.72894    | 67.97310     | 100.0000 |

Totals : 442.72894 67.97310

Signal 2: DAD1 B, Sig=254,16 Ref=off

| Peak # | RetTime [min] | Type | Width [min] | Area [mAU*s] | Height [mAU] | Area %   |
|--------|---------------|------|-------------|--------------|--------------|----------|
| 1      | 15.303        | BB   | 0.0995      | 631.04565    | 97.49252     | 100.0000 |

Totals : 631.04565 97.49252

**S226**

Signal 3: DAD1 C, Sig=210,8 Ref=off

| Peak # | RetTime [min] | Type | Width [min] | Area [mAU*s] | Height [mAU] | Area %   |
|--------|---------------|------|-------------|--------------|--------------|----------|
| 1      | 15.303        | BV   | 0.1224      | 2.13590e4    | 2755.23682   | 100.0000 |

Totals : 2.13590e4 2755.23682

Signal 4: DAD1 D, Sig=230,16 Ref=off

| Peak # | RetTime [min] | Type | Width [min] | Area [mAU*s] | Height [mAU] | Area %   |
|--------|---------------|------|-------------|--------------|--------------|----------|
| 1      | 15.303        | BB   | 0.0996      | 7499.44434   | 1157.97766   | 100.0000 |

Totals : 7499.44434 1157.97766

Signal 5: DAD1 E, Sig=280,16 Ref=off

| Peak # | RetTime [min] | Type | Width [min] | Area [mAU*s] | Height [mAU] | Area %   |
|--------|---------------|------|-------------|--------------|--------------|----------|
| 1      | 15.303        | BB   | 0.0987      | 1380.06250   | 215.62195    | 100.0000 |

Totals : 1380.06250 215.62195

Signal 6: DAD1 F, Sig=280,16 Ref=off

| Peak # | RetTime [min] | Type | Width [min] | Area [mAU*s] | Height [mAU] | Area %   |
|--------|---------------|------|-------------|--------------|--------------|----------|
| 1      | 15.303        | BB   | 0.0987      | 1380.06250   | 215.62195    | 100.0000 |

Totals : 1380.06250 215.62195

=====  
\*\*\* End of Report \*\*\*

# HRMS of compound 72

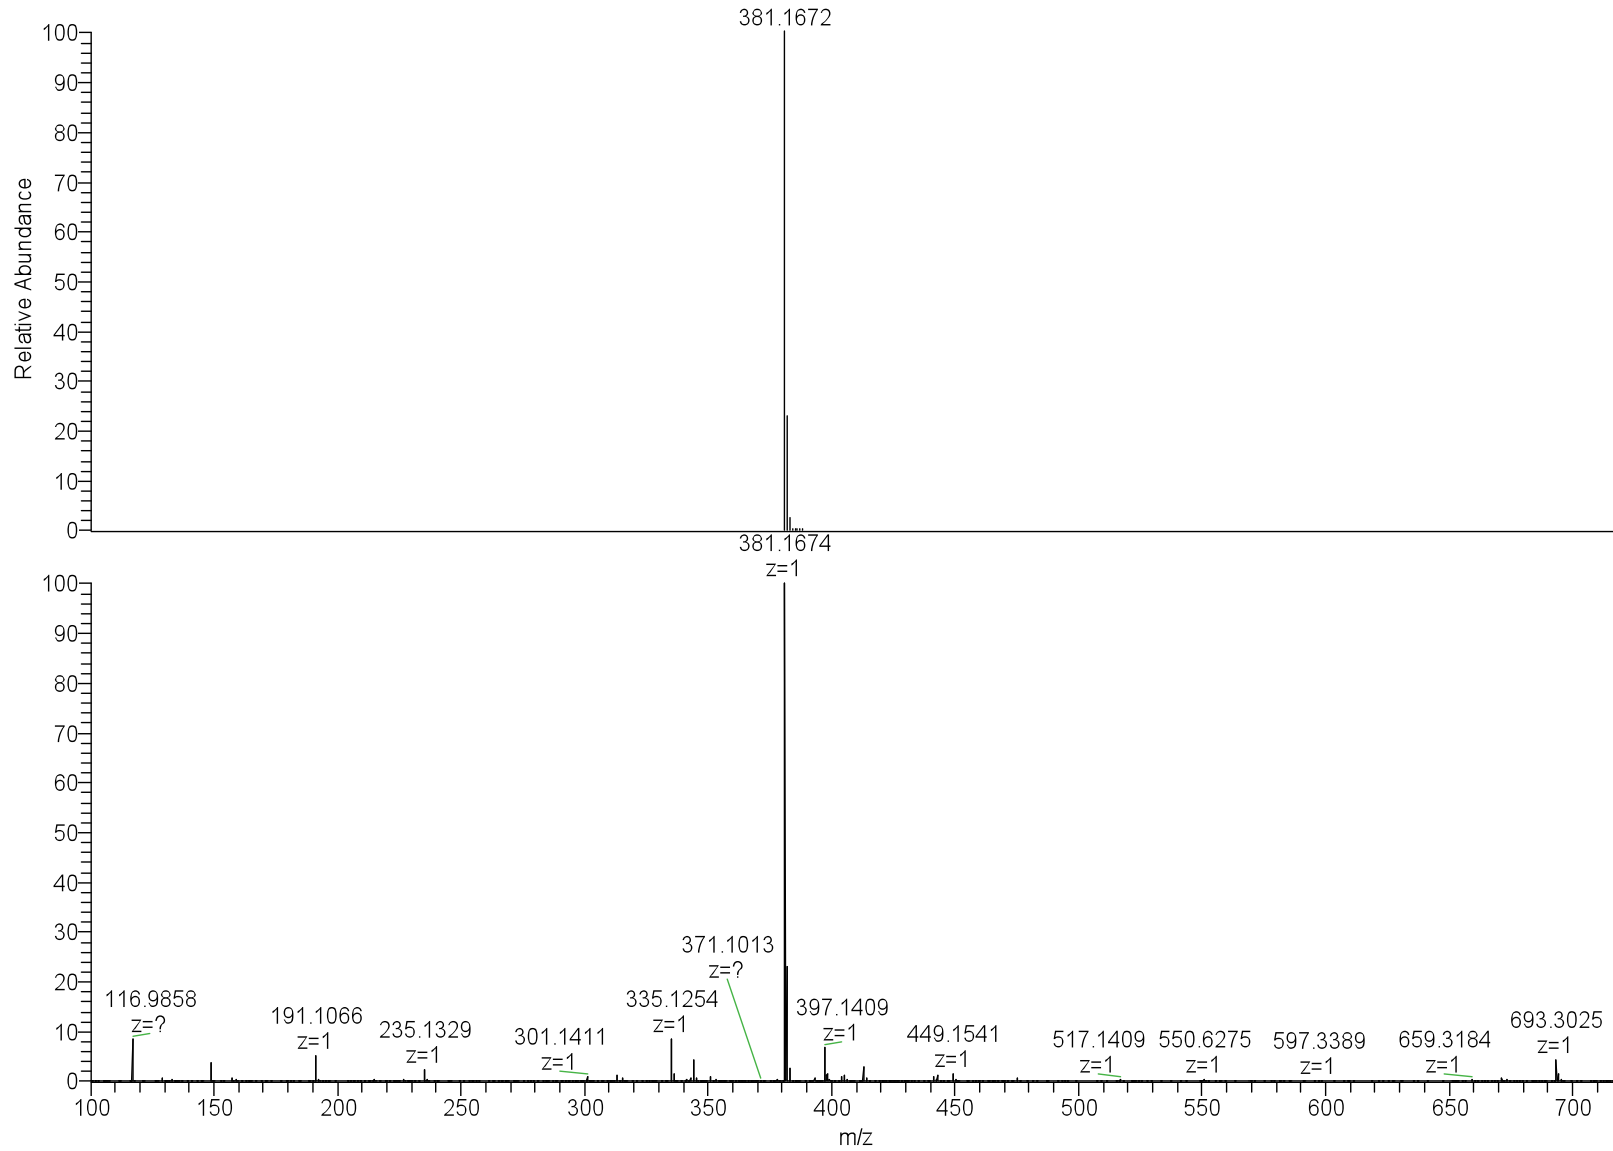

NL:  
7.86E5  
C<sub>21</sub>H<sub>26</sub>O<sub>5</sub>Na:  
C<sub>21</sub>H<sub>26</sub>O<sub>5</sub>Na<sub>1</sub>  
pa Chrg 1

NL:  
1.83E7  
TG\_1\_112\_ORBI\_+  
ESI#1 RT: 0.00  
AV: 1 T: FTMS + p  
ESI Full ms  
[100.00-720.00]

**S228**

## X-ray Crystallographic Analysis:

X-ray crystallographic analysis of compound **72**.<sup>S1</sup> Crystallographic data

were collected on a crystal of **72** with dimensions 0.30 x 0.17 x 0.14 mm<sup>3</sup>. Data were collected at 150 K on a Bruker X8 Apex using Mo KR radiation ( $\lambda = 0.71073 \text{ \AA}$ ). The structure was solved by direct methods after correction of the data using SADABS.

Crystallographic data and refinement details for the complex mentioned herein is found in the Supporting Information (Table S1-S5). The thermal ellipsoid plots at 50% probability for compound **73** is displayed in Figure S1. All data were processed using the Bruker AXS SHELXTL software, version 6.10.

Figure S1. X-ray crystallography of compound **72**

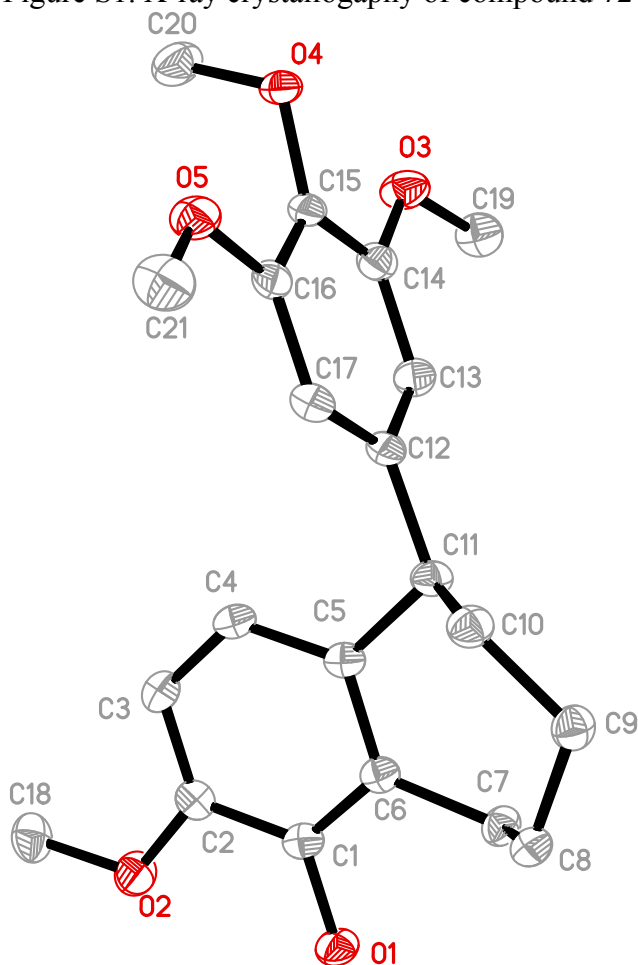

Table S1. Crystal data and structure refinement for Compound 72

|                                   |                                                |          |
|-----------------------------------|------------------------------------------------|----------|
| Identification code               | KP69                                           |          |
| Empirical formula                 | C <sub>21</sub> H <sub>26</sub> O <sub>5</sub> |          |
| Formula weight                    | 358.42                                         |          |
| Temperature                       | 150(2) K                                       |          |
| Wavelength                        | 0.71073 Å                                      |          |
| Crystal system                    | Orthorhombic                                   |          |
| Space group                       | P c a 21                                       |          |
| Unit cell dimensions              | a = 16.5289(7) Å                               | α = 90°. |
|                                   | b = 11.7370(4) Å                               | β = 90°. |
|                                   | c = 9.4340(4) Å                                | γ = 90°. |
| Volume                            | 1830.19(13) Å <sup>3</sup>                     |          |
| Z                                 | 4                                              |          |
| Density (calculated)              | 1.301 Mg/m <sup>3</sup>                        |          |
| Absorption coefficient            | 0.092 mm <sup>-1</sup>                         |          |
| F(000)                            | 768                                            |          |
| Crystal size                      | 0.303 x 0.165 x 0.144 mm <sup>3</sup>          |          |
| Theta range for data collection   | 5.211 to 25.675°.                              |          |
| Index ranges                      | -20 ≤ h ≤ 18, -14 ≤ k ≤ 12, -11 ≤ l ≤ 11       |          |
| Reflections collected             | 15353                                          |          |
| Independent reflections           | 3439 [R(int) = 0.0219]                         |          |
| Completeness to theta = 25.242°   | 98.8 %                                         |          |
| Absorption correction             | Semi-empirical from equivalents                |          |
| Max. and min. transmission        | 0.987 and 0.981                                |          |
| Refinement method                 | Full-matrix least-squares on F <sup>2</sup>    |          |
| Data / restraints / parameters    | 3439 / 1 / 238                                 |          |
| Goodness-of-fit on F <sup>2</sup> | 1.040                                          |          |
| Final R indices [I > 2σ(I)]       | R1 = 0.0270, wR2 = 0.0688                      |          |
| R indices (all data)              | R1 = 0.0283, wR2 = 0.0696                      |          |
| Absolute structure parameter      | 0.27(19)                                       |          |
| Extinction coefficient            | n/a                                            |          |
| Largest diff. peak and hole       | 0.164 and -0.148 e.Å <sup>-3</sup>             |          |

Table S2. Atomic coordinates ( $\times 10^4$ ) and equivalent isotropic displacement parameters ( $\text{\AA}^2 \times 10^3$ ) for Compound 72.  $U(\text{eq})$  is defined as one third of the trace of the orthogonalized  $U^{ij}$  tensor.

|       | x       | y        | z       | $U(\text{eq})$ |
|-------|---------|----------|---------|----------------|
| O(1)  | 1246(1) | 1871(1)  | 4248(2) | 24(1)          |
| O(2)  | 1430(1) | 2238(1)  | 1512(2) | 29(1)          |
| O(3)  | 3644(1) | 8680(1)  | 4127(2) | 28(1)          |
| O(4)  | 2556(1) | 10180(1) | 3151(2) | 24(1)          |
| O(5)  | 990(1)  | 9662(1)  | 2973(2) | 26(1)          |
| C(1)  | 1350(1) | 2969(2)  | 3795(2) | 20(1)          |
| C(2)  | 1457(1) | 3188(2)  | 2347(2) | 20(1)          |
| C(3)  | 1576(1) | 4290(2)  | 1891(2) | 22(1)          |
| C(4)  | 1583(1) | 5174(2)  | 2885(2) | 21(1)          |
| C(5)  | 1469(1) | 4976(2)  | 4319(2) | 19(1)          |
| C(6)  | 1353(1) | 3842(2)  | 4791(2) | 18(1)          |
| C(7)  | 1236(1) | 3543(2)  | 6335(2) | 21(1)          |
| C(8)  | 465(1)  | 4047(2)  | 6998(2) | 22(1)          |
| C(9)  | 551(1)  | 5284(2)  | 7436(2) | 23(1)          |
| C(10) | 674(1)  | 6106(2)  | 6204(2) | 23(1)          |
| C(11) | 1482(1) | 5954(2)  | 5399(2) | 21(1)          |
| C(12) | 1759(1) | 7070(2)  | 4737(2) | 20(1)          |
| C(13) | 2579(1) | 7317(2)  | 4714(2) | 22(1)          |
| C(14) | 2852(1) | 8337(2)  | 4136(2) | 22(1)          |
| C(15) | 2300(1) | 9113(2)  | 3569(2) | 20(1)          |
| C(16) | 1482(1) | 8849(2)  | 3561(2) | 21(1)          |
| C(17) | 1208(1) | 7832(2)  | 4148(2) | 22(1)          |
| C(18) | 1560(1) | 2377(2)  | 33(2)   | 30(1)          |
| C(19) | 4209(1) | 7955(2)  | 4832(2) | 29(1)          |
| C(20) | 2828(2) | 10219(2) | 1717(2) | 33(1)          |
| C(21) | 138(1)  | 9516(2)  | 3108(3) | 34(1)          |

Table S3. Bond lengths [Å] and angles [°] for Compound 72.

---

|                  |            |
|------------------|------------|
| O(1)-C(1)        | 1.369(2)   |
| O(2)-C(2)        | 1.365(2)   |
| O(2)-C(18)       | 1.421(2)   |
| O(3)-C(14)       | 1.370(2)   |
| O(3)-C(19)       | 1.428(3)   |
| O(4)-C(15)       | 1.379(2)   |
| O(4)-C(20)       | 1.427(3)   |
| O(5)-C(16)       | 1.371(2)   |
| O(5)-C(21)       | 1.425(3)   |
| C(1)-C(6)        | 1.390(3)   |
| C(1)-C(2)        | 1.401(3)   |
| C(2)-C(3)        | 1.378(3)   |
| C(3)-C(4)        | 1.398(3)   |
| C(4)-C(5)        | 1.386(3)   |
| C(5)-C(6)        | 1.416(2)   |
| C(5)-C(11)       | 1.535(3)   |
| C(6)-C(7)        | 1.511(3)   |
| C(7)-C(8)        | 1.537(3)   |
| C(8)-C(9)        | 1.516(3)   |
| C(9)-C(10)       | 1.524(3)   |
| C(10)-C(11)      | 1.547(3)   |
| C(11)-C(12)      | 1.522(3)   |
| C(12)-C(13)      | 1.386(3)   |
| C(12)-C(17)      | 1.392(3)   |
| C(13)-C(14)      | 1.391(3)   |
| C(14)-C(15)      | 1.395(3)   |
| C(15)-C(16)      | 1.387(3)   |
| C(16)-C(17)      | 1.392(3)   |
| <br>             |            |
| C(2)-O(2)-C(18)  | 117.91(17) |
| C(14)-O(3)-C(19) | 116.57(16) |
| C(15)-O(4)-C(20) | 113.41(15) |
| C(16)-O(5)-C(21) | 117.79(16) |
| O(1)-C(1)-C(6)   | 118.90(17) |



|                   |            |
|-------------------|------------|
| O(1)-C(1)-C(2)    | 119.50(17) |
| C(6)-C(1)-C(2)    | 121.59(17) |
| O(2)-C(2)-C(3)    | 126.22(18) |
| O(2)-C(2)-C(1)    | 114.18(17) |
| C(3)-C(2)-C(1)    | 119.60(18) |
| C(2)-C(3)-C(4)    | 119.23(18) |
| C(5)-C(4)-C(3)    | 121.97(18) |
| C(4)-C(5)-C(6)    | 118.87(17) |
| C(4)-C(5)-C(11)   | 121.39(17) |
| C(6)-C(5)-C(11)   | 119.73(17) |
| C(1)-C(6)-C(5)    | 118.74(17) |
| C(1)-C(6)-C(7)    | 118.67(17) |
| C(5)-C(6)-C(7)    | 122.59(17) |
| C(6)-C(7)-C(8)    | 114.15(16) |
| C(9)-C(8)-C(7)    | 113.66(16) |
| C(8)-C(9)-C(10)   | 114.30(17) |
| C(9)-C(10)-C(11)  | 114.53(16) |
| C(12)-C(11)-C(5)  | 112.05(16) |
| C(12)-C(11)-C(10) | 111.19(15) |
| C(5)-C(11)-C(10)  | 113.60(15) |
| C(13)-C(12)-C(17) | 119.96(17) |
| C(13)-C(12)-C(11) | 118.70(16) |
| C(17)-C(12)-C(11) | 121.33(17) |
| C(12)-C(13)-C(14) | 120.18(17) |
| O(3)-C(14)-C(13)  | 124.41(18) |
| O(3)-C(14)-C(15)  | 115.49(17) |
| C(13)-C(14)-C(15) | 120.05(18) |
| O(4)-C(15)-C(16)  | 120.02(17) |
| O(4)-C(15)-C(14)  | 120.12(17) |
| C(16)-C(15)-C(14) | 119.54(17) |
| O(5)-C(16)-C(15)  | 115.12(17) |
| O(5)-C(16)-C(17)  | 124.41(18) |
| C(15)-C(16)-C(17) | 120.46(18) |
| C(16)-C(17)-C(12) | 119.78(18) |

---

Symmetry transformations used to generate equivalent atoms:

Table S4. Anisotropic displacement parameters ( $\text{\AA}^2 \times 10^3$ ) for Compound 72. The anisotropic displacement factor exponent takes the form:  $-2\pi^2 [ h^2 a^{*2} U^{11} + \dots + 2 h k a^* b^* U^{12} ]$

|       | U <sup>11</sup> | U <sup>22</sup> | U <sup>33</sup> | U <sup>23</sup> | U <sup>13</sup> | U <sup>12</sup> |
|-------|-----------------|-----------------|-----------------|-----------------|-----------------|-----------------|
| O(1)  | 36(1)           | 14(1)           | 24(1)           | 0(1)            | 3(1)            | 0(1)            |
| O(2)  | 45(1)           | 21(1)           | 22(1)           | -4(1)           | 2(1)            | 2(1)            |
| O(3)  | 22(1)           | 26(1)           | 37(1)           | 6(1)            | -1(1)           | -5(1)           |
| O(4)  | 38(1)           | 15(1)           | 21(1)           | 0(1)            | 3(1)            | -5(1)           |
| O(5)  | 28(1)           | 18(1)           | 34(1)           | 2(1)            | -5(1)           | 4(1)            |
| C(1)  | 17(1)           | 18(1)           | 25(1)           | 2(1)            | 1(1)            | 1(1)            |
| C(2)  | 18(1)           | 21(1)           | 22(1)           | -3(1)           | 1(1)            | 2(1)            |
| C(3)  | 23(1)           | 24(1)           | 19(1)           | 3(1)            | 2(1)            | 2(1)            |
| C(4)  | 21(1)           | 16(1)           | 24(1)           | 3(1)            | 2(1)            | -1(1)           |
| C(5)  | 16(1)           | 17(1)           | 23(1)           | 1(1)            | 1(1)            | 0(1)            |
| C(6)  | 14(1)           | 19(1)           | 22(1)           | 2(1)            | 1(1)            | 1(1)            |
| C(7)  | 25(1)           | 18(1)           | 19(1)           | 2(1)            | 1(1)            | 2(1)            |
| C(8)  | 25(1)           | 22(1)           | 20(1)           | 2(1)            | 2(1)            | -4(1)           |
| C(9)  | 24(1)           | 24(1)           | 21(1)           | -1(1)           | 4(1)            | 1(1)            |
| C(10) | 25(1)           | 18(1)           | 25(1)           | 0(1)            | 1(1)            | 1(1)            |
| C(11) | 23(1)           | 15(1)           | 23(1)           | 1(1)            | -1(1)           | -1(1)           |
| C(12) | 27(1)           | 15(1)           | 20(1)           | -3(1)           | 0(1)            | -3(1)           |
| C(13) | 26(1)           | 17(1)           | 24(1)           | 0(1)            | -1(1)           | 2(1)            |
| C(14) | 24(1)           | 21(1)           | 21(1)           | -2(1)           | 3(1)            | -3(1)           |
| C(15) | 30(1)           | 14(1)           | 17(1)           | -2(1)           | 2(1)            | -5(1)           |
| C(16) | 28(1)           | 15(1)           | 19(1)           | -3(1)           | -2(1)           | 2(1)            |
| C(17) | 22(1)           | 18(1)           | 25(1)           | -3(1)           | -1(1)           | -2(1)           |
| C(18) | 36(1)           | 32(1)           | 22(1)           | -7(1)           | 1(1)            | 4(1)            |
| C(19) | 23(1)           | 30(1)           | 35(1)           | 2(1)            | 0(1)            | 0(1)            |
| C(20) | 47(1)           | 26(1)           | 26(1)           | 3(1)            | 10(1)           | -3(1)           |
| C(21) | 29(1)           | 28(1)           | 46(1)           | -2(1)           | -4(1)           | 8(1)            |

Table 5. Hydrogen bonds for 72 [ $\text{\AA}$  and  $^\circ$ ].

| D-H...A            | d(D-H)  | d(H...A) | d(D...A)   | <(DHA) |
|--------------------|---------|----------|------------|--------|
| O(1)-H(1)...O(2)   | 0.85(3) | 2.17(3)  | 2.635(2)   | 115(2) |
| O(1)-H(1)...O(4)#1 | 0.85(3) | 2.47(3)  | 3.115(2)   | 133(2) |
| O(1)-H(1)...O(5)#1 | 0.85(3) | 2.25(3)  | 2.8890(19) | 133(2) |

Symmetry transformations used to generate equivalent atoms:

#1 x,y-1,z

Crystallographic data for structure **72** (deposition number CCDC

1037721) reported in this paper have been deposited with the Cambridge

Crystallographic Data Centre. Copies of the data can be obtained, free of charge, on

application to the Director, CCDC, 12 Union Road, Cambridge CB2 1EZ, UK (fax: +44-

(0) 1223-336033 or e-mail: [deposit@ccdc.cam.ac.uk](mailto:deposit@ccdc.cam.ac.uk)).

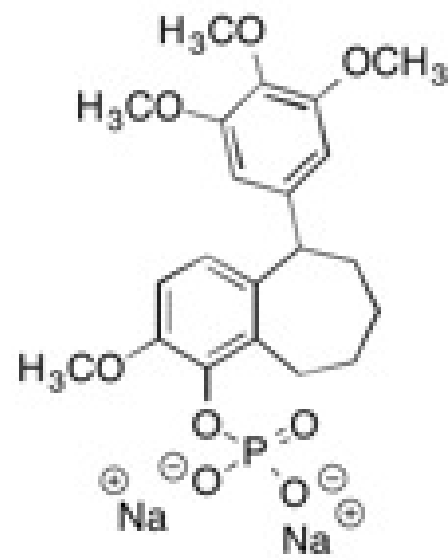

**73**

6.428  
6.378  
6.361  
6.085  
6.068  
4.638  
4.637  
4.057  
4.038  
3.613  
3.600  
3.555  
3.269  
3.266  
3.265  
3.260  
3.258  
2.573  
2.549  
2.523  
1.911  
1.902  
1.885  
1.773  
1.763  
1.762  
1.746  
1.719  
1.719  
1.699  
1.674  
1.651  
1.631  
1.609  
1.588  
1.583  
1.195  
1.174  
1.151  
1.128

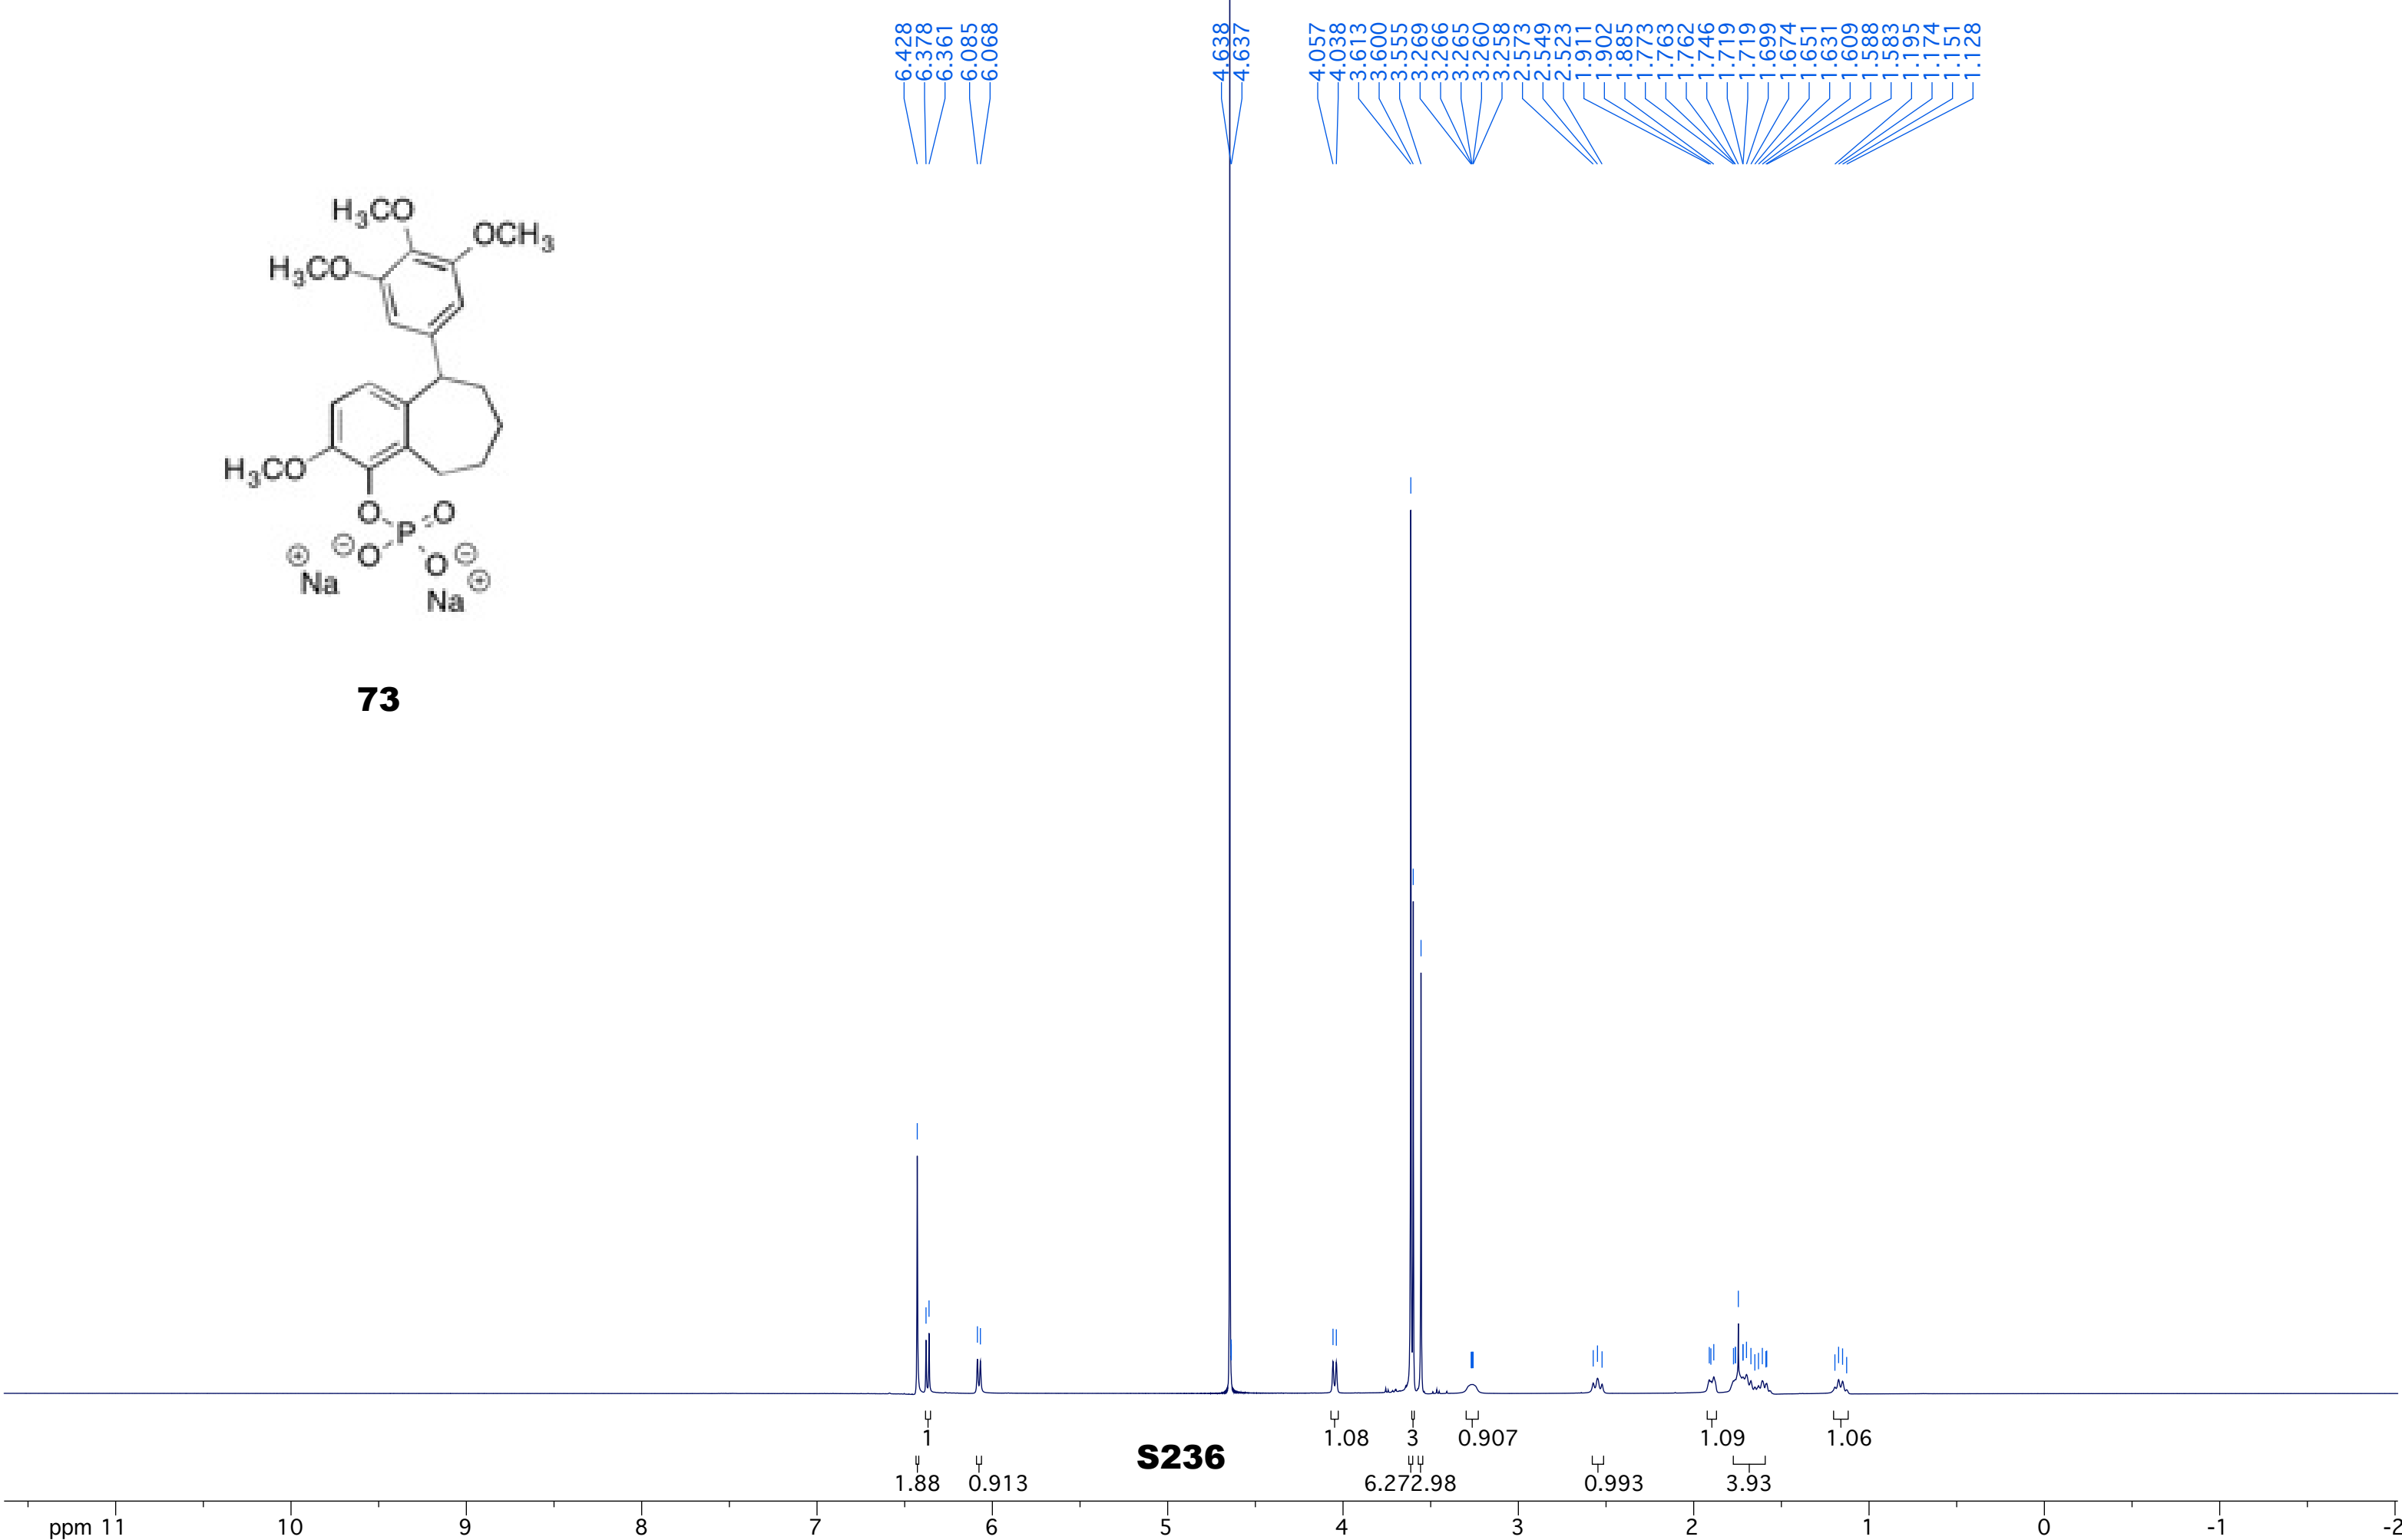

ppm 11

10

9

8

7

6

5

4

3

2

1

0

-1

-2

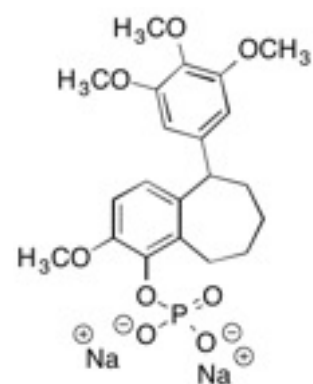

**73**

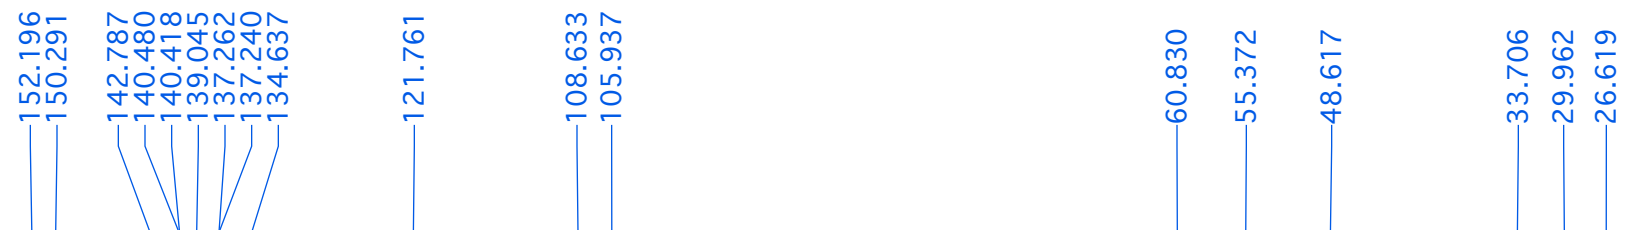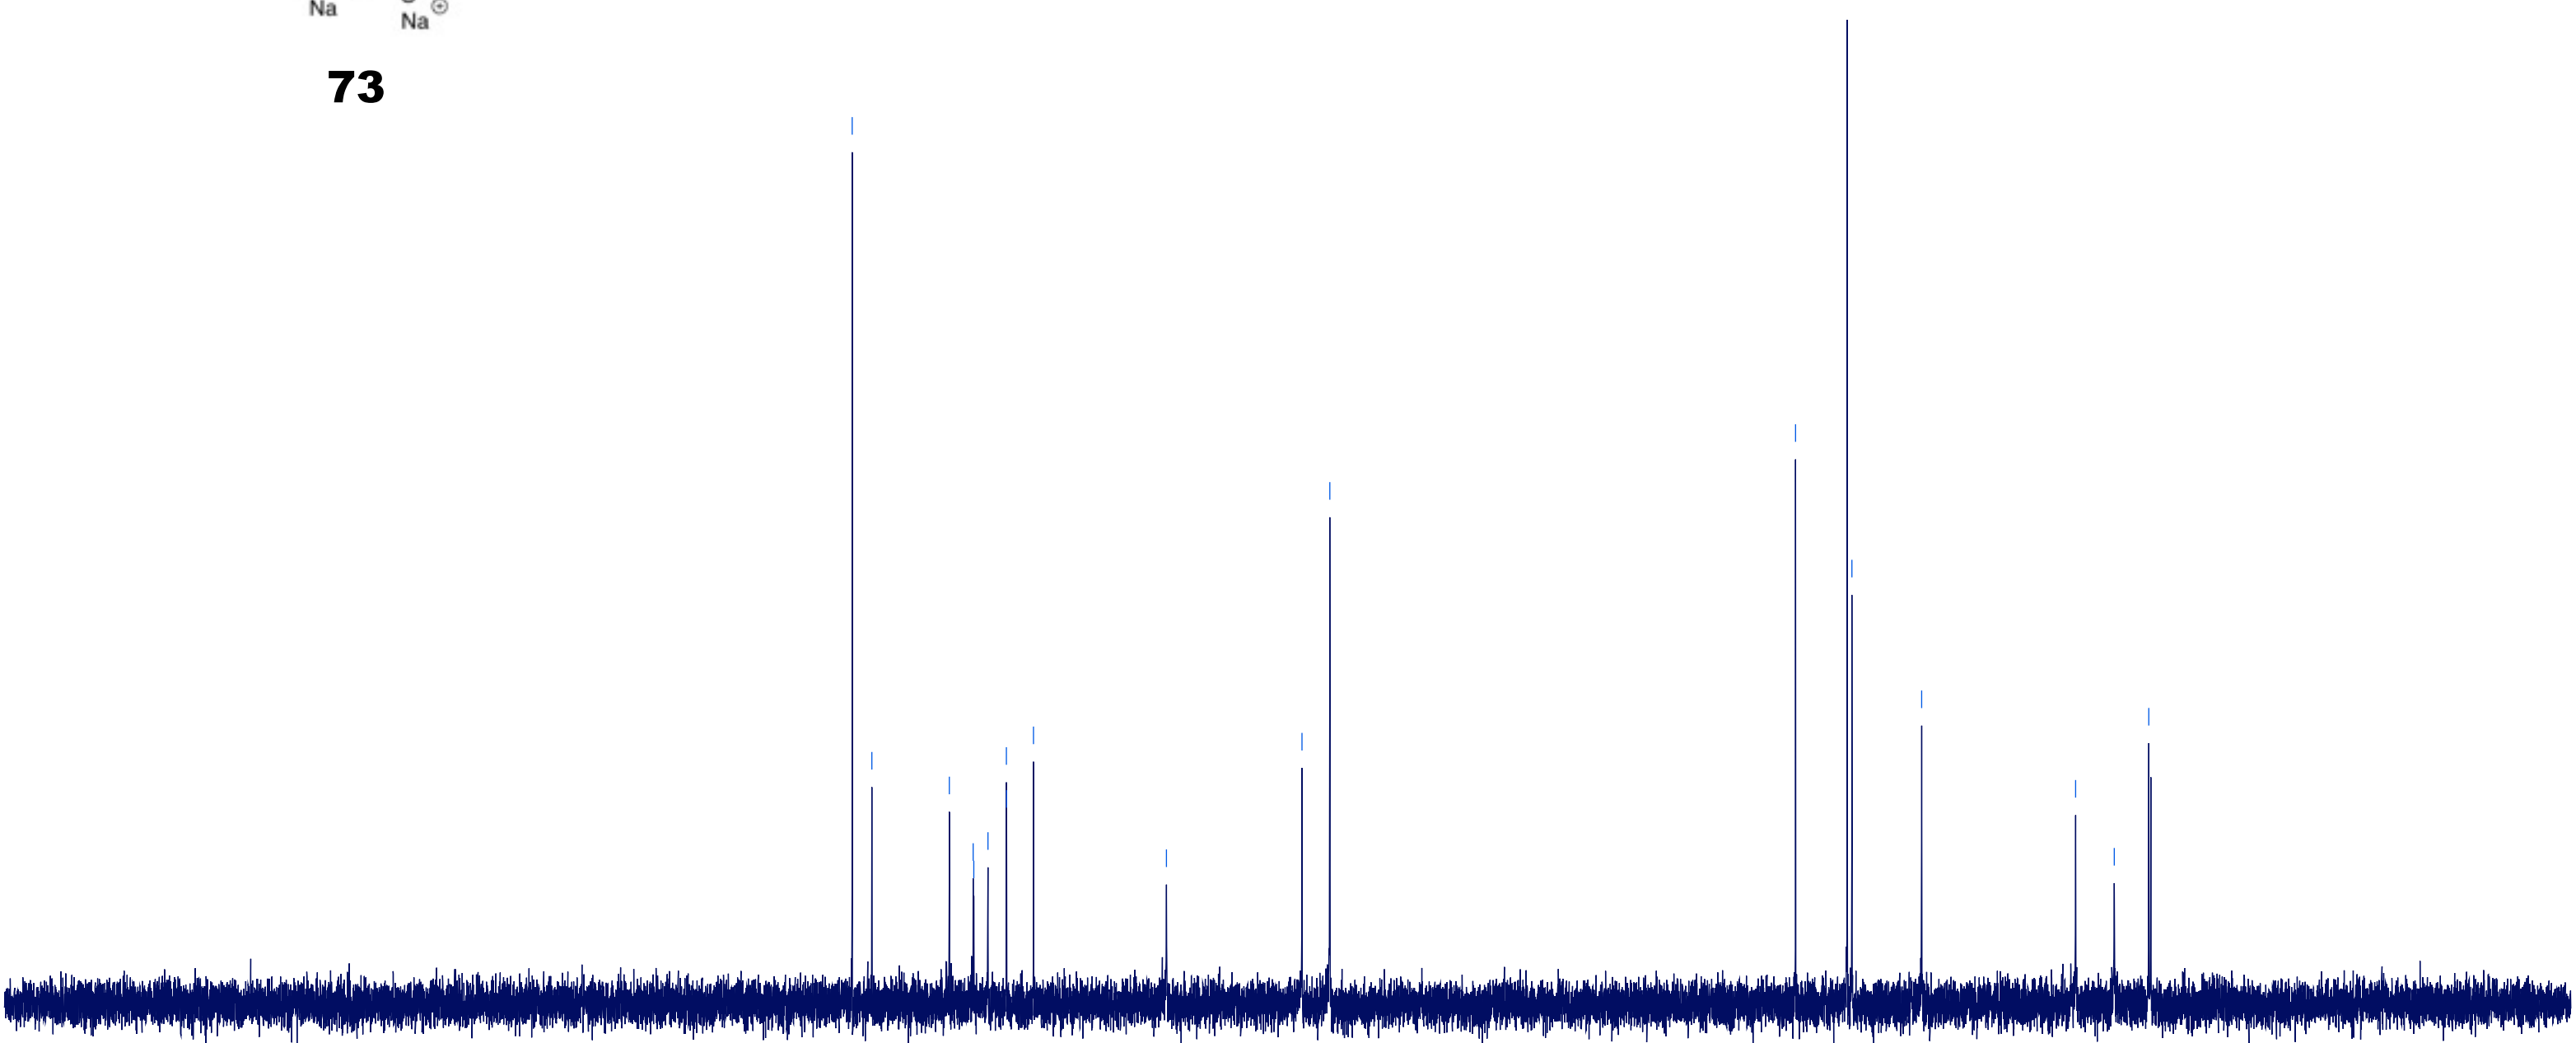

**S237**

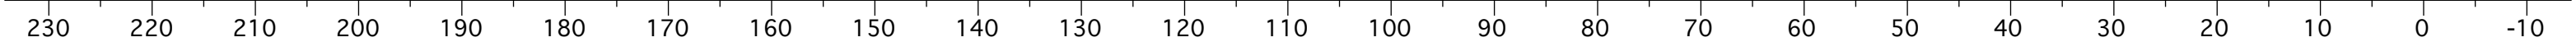

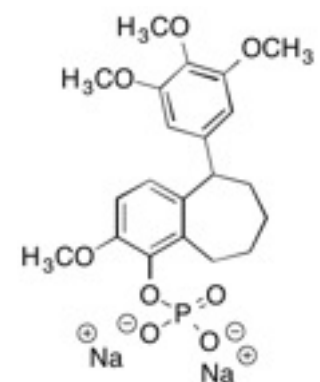

**73**

0.974  
0.000

**S238**

ppm 70 60 50 40 30 20 10 0 -10 -20 -30 -40

**HPLC of compound 73**

=====  
Acq. Operator : Christine  
Acq. Instrument : Instrument 1 Location : -  
Injection Date : 7/7/2014 11:35:27 AM  
Acq. Method : C:\CHEM32\1\METHODS\MASTERMETHOD2.M  
Last changed : 7/7/2014 10:56:34 AM by Christine  
Analysis Method : C:\CHEM32\1\DATA\CHRISTINE\CAH-4-4800001.D\DA.M (MASTERMETHOD2.M)  
Last changed : 7/7/2014 12:27:43 PM by Christine  
Sample Info :

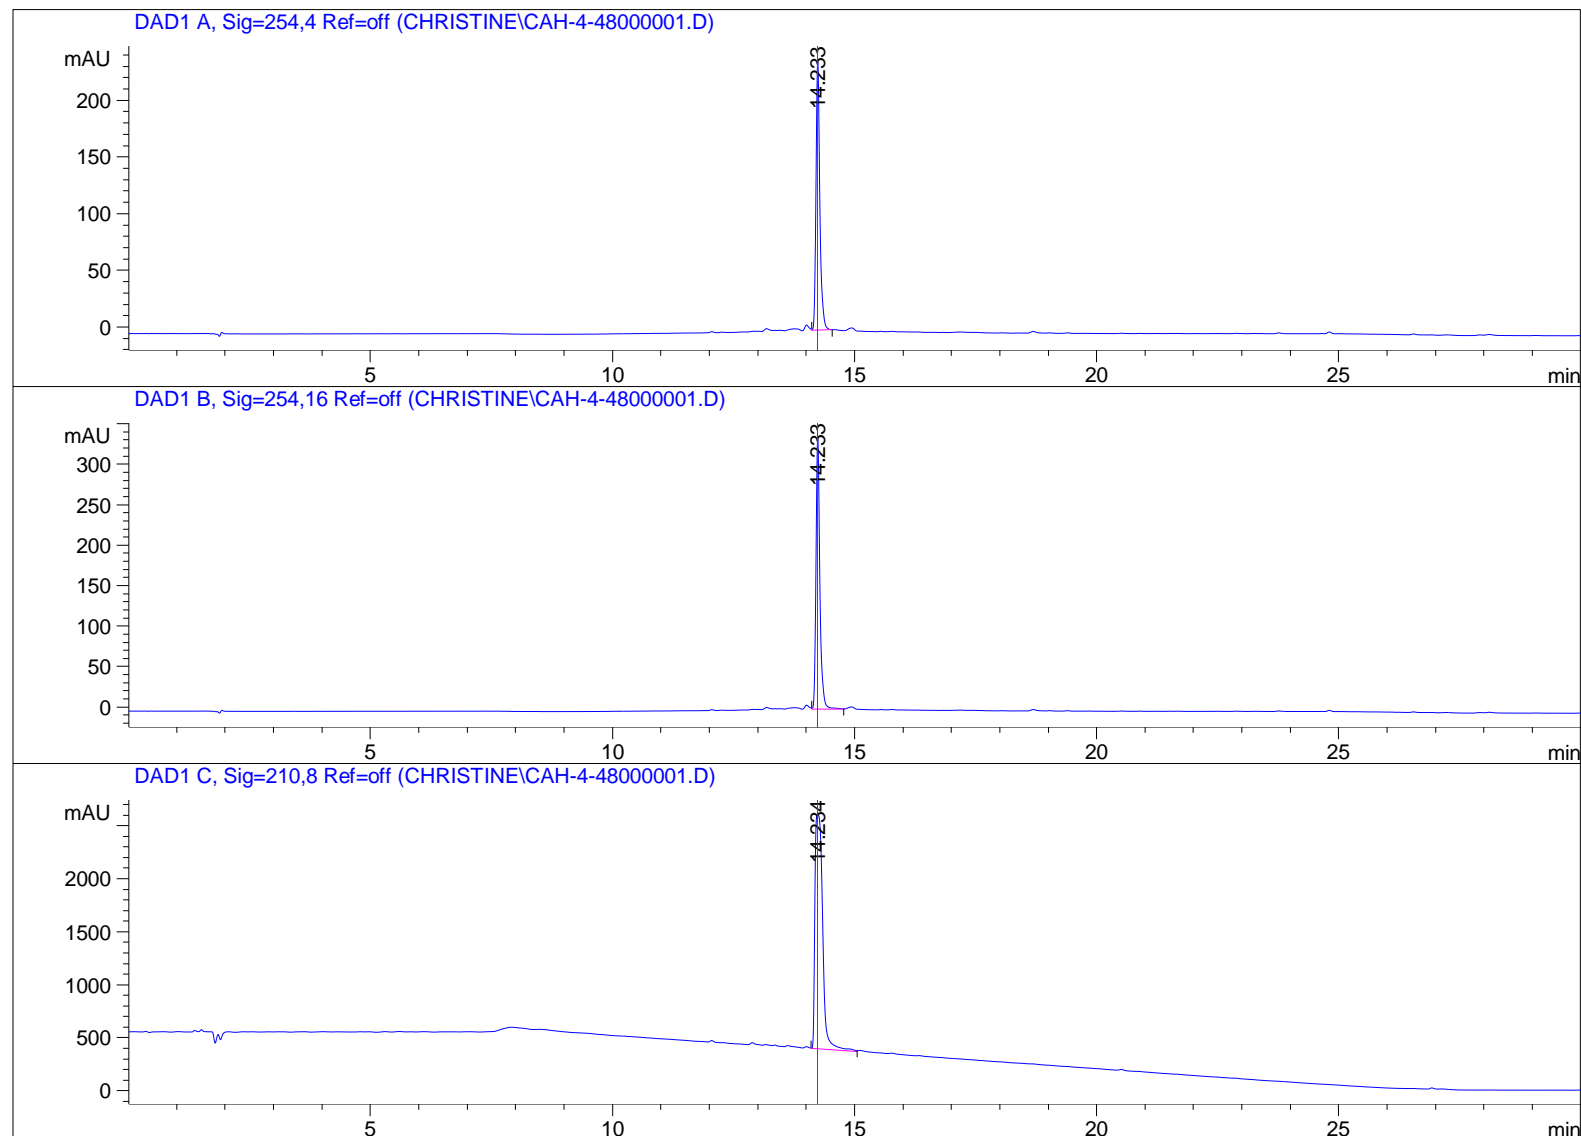**S239**

Sample Name: cah-4-48

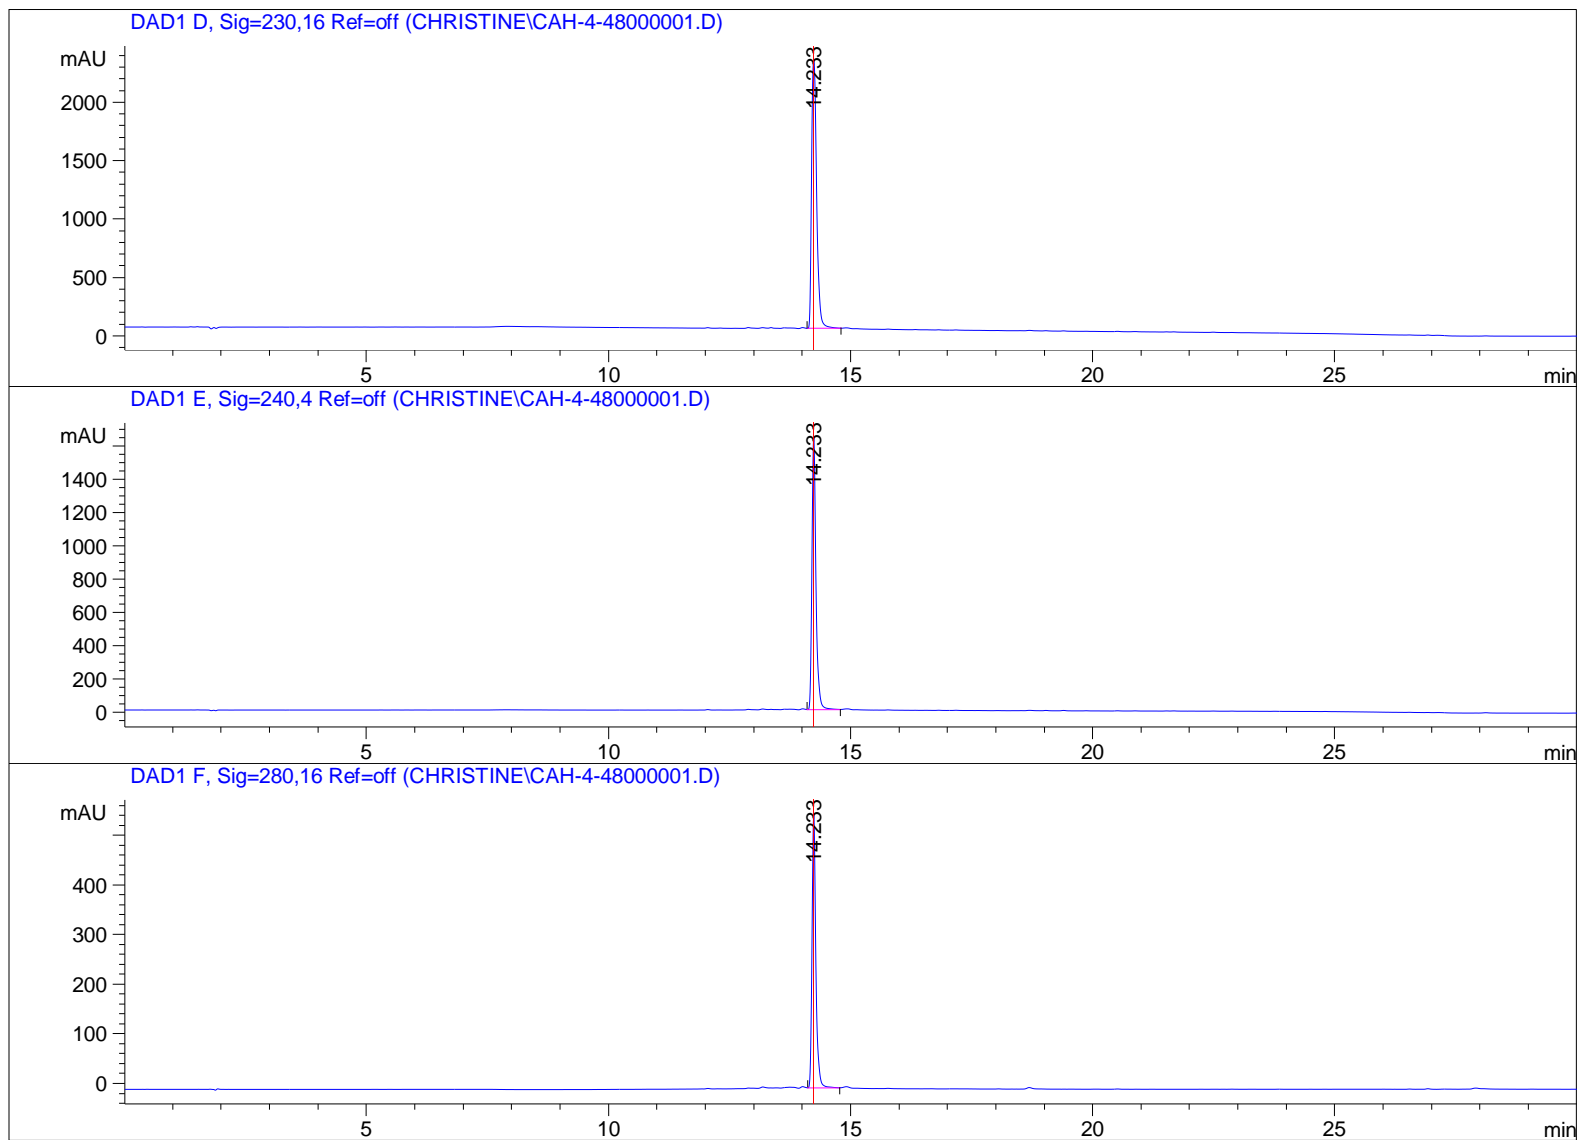

```
=====
                          Area Percent Report
=====
```

```
Sorted By           :      Signal
Multiplier          :      1.0000
Dilution            :      1.0000
Use Multiplier & Dilution Factor with ISTDs
```

Signal 1: DAD1 A, Sig=254,4 Ref=off

| Peak # | RetTime [min] | Type | Width [min] | Area [mAU*s] | Height [mAU] | Area %   |
|--------|---------------|------|-------------|--------------|--------------|----------|
| 1      | 14.233        | VB   | 0.0823      | 1316.60486   | 238.95862    | 100.0000 |

```
Totals :                1316.60486  238.95862
```



Signal 2: DAD1 B, Sig=254,16 Ref=off

| Peak # | RetTime [min] | Type | Width [min] | Area [mAU*s] | Height [mAU] | Area %   |
|--------|---------------|------|-------------|--------------|--------------|----------|
| 1      | 14.233        | VV   | 0.0833      | 1889.52271   | 337.36499    | 100.0000 |

Totals : 1889.52271 337.36499

Signal 3: DAD1 C, Sig=210,8 Ref=off

| Peak # | RetTime [min] | Type | Width [min] | Area [mAU*s] | Height [mAU] | Area %   |
|--------|---------------|------|-------------|--------------|--------------|----------|
| 1      | 14.234        | VV   | 0.1789      | 2.45007e4    | 2218.16870   | 100.0000 |

Totals : 2.45007e4 2218.16870

Signal 4: DAD1 D, Sig=230,16 Ref=off

| Peak # | RetTime [min] | Type | Width [min] | Area [mAU*s] | Height [mAU] | Area %   |
|--------|---------------|------|-------------|--------------|--------------|----------|
| 1      | 14.233        | VV   | 0.1151      | 1.67958e4    | 2302.03564   | 100.0000 |

Totals : 1.67958e4 2302.03564

Signal 5: DAD1 E, Sig=240,4 Ref=off

| Peak # | RetTime [min] | Type | Width [min] | Area [mAU*s] | Height [mAU] | Area %   |
|--------|---------------|------|-------------|--------------|--------------|----------|
| 1      | 14.233        | VV   | 0.0897      | 9544.16406   | 1644.86255   | 100.0000 |

Totals : 9544.16406 1644.86255

Signal 6: DAD1 F, Sig=280,16 Ref=off

| Peak # | RetTime [min] | Type | Width [min] | Area [mAU*s] | Height [mAU] | Area %   |
|--------|---------------|------|-------------|--------------|--------------|----------|
| 1      | 14.233        | VV   | 0.0826      | 3068.52466   | 554.10748    | 100.0000 |

Totals : 3068.52466 554.10748

=====  
\*\*\* End of Report \*\*\*

# HRMS of compound 73

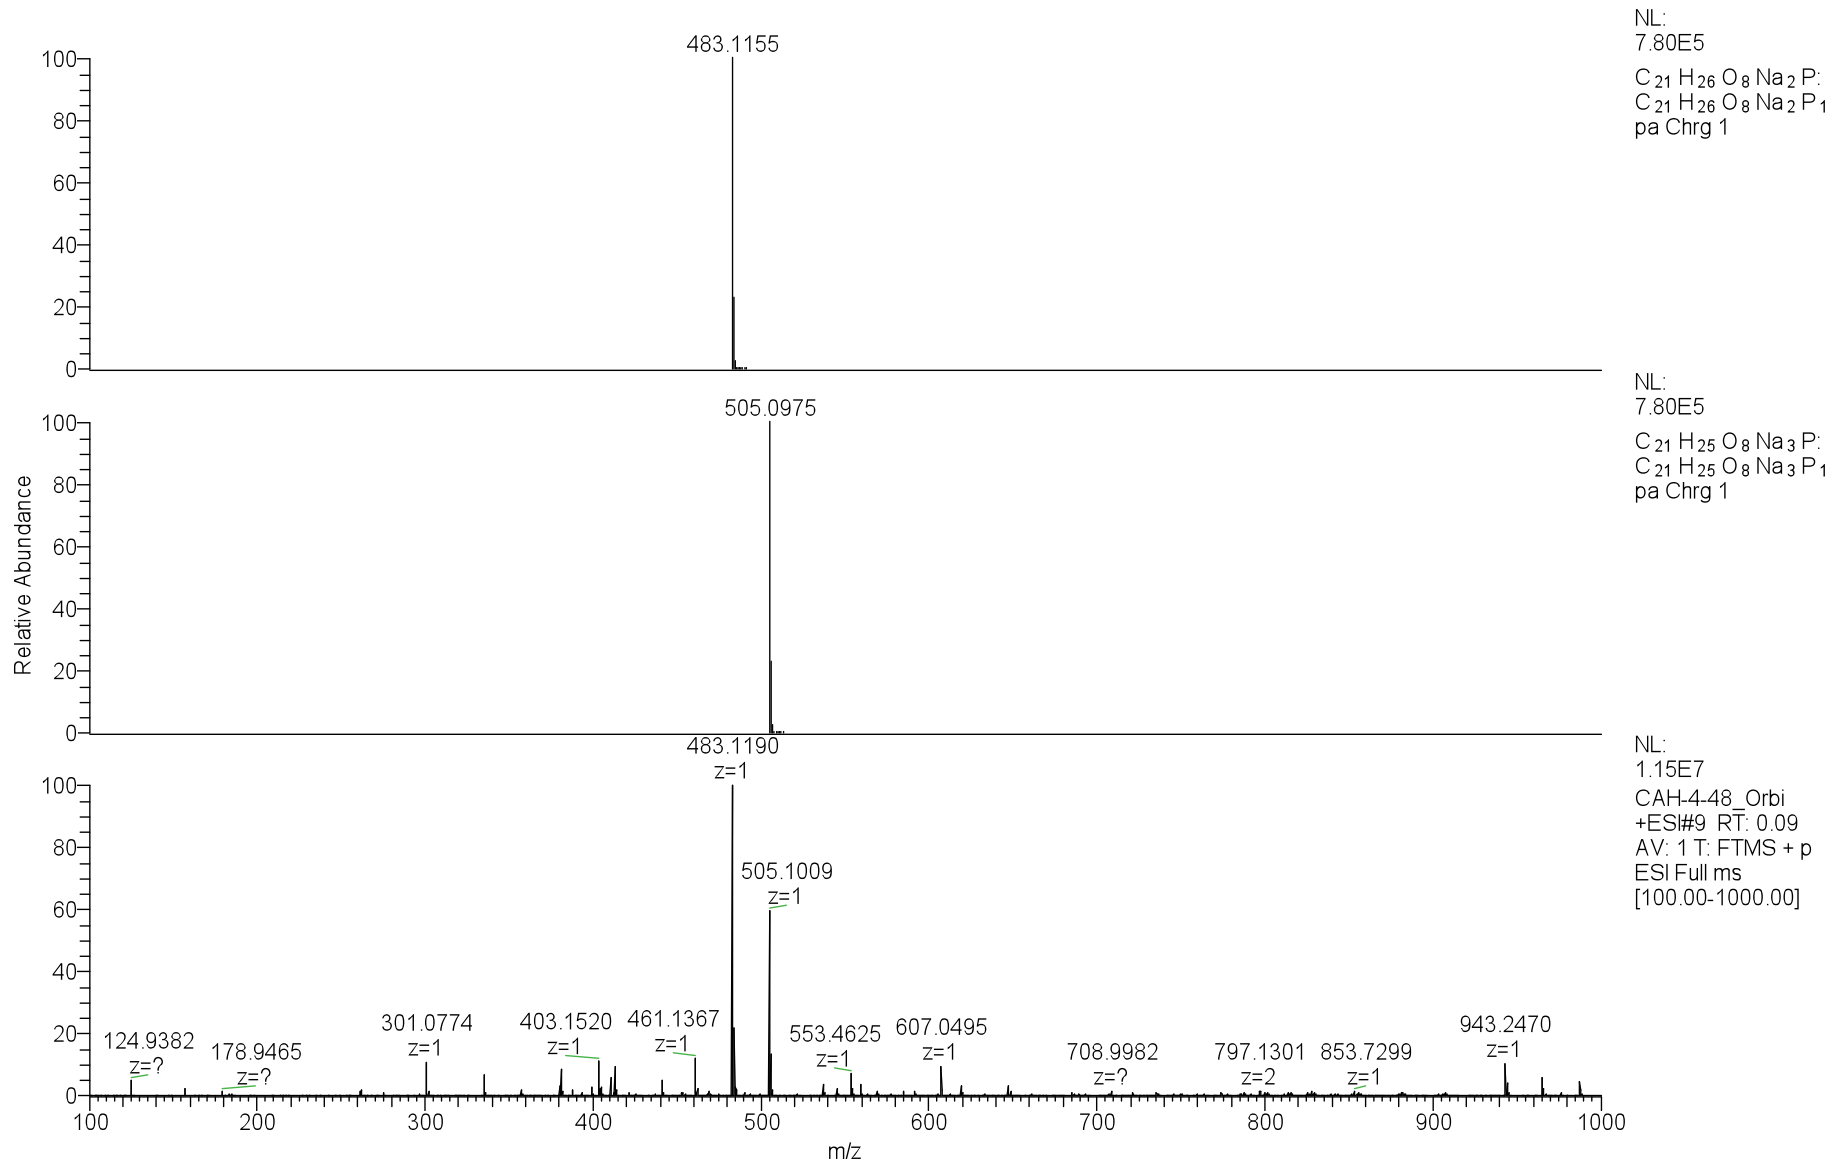

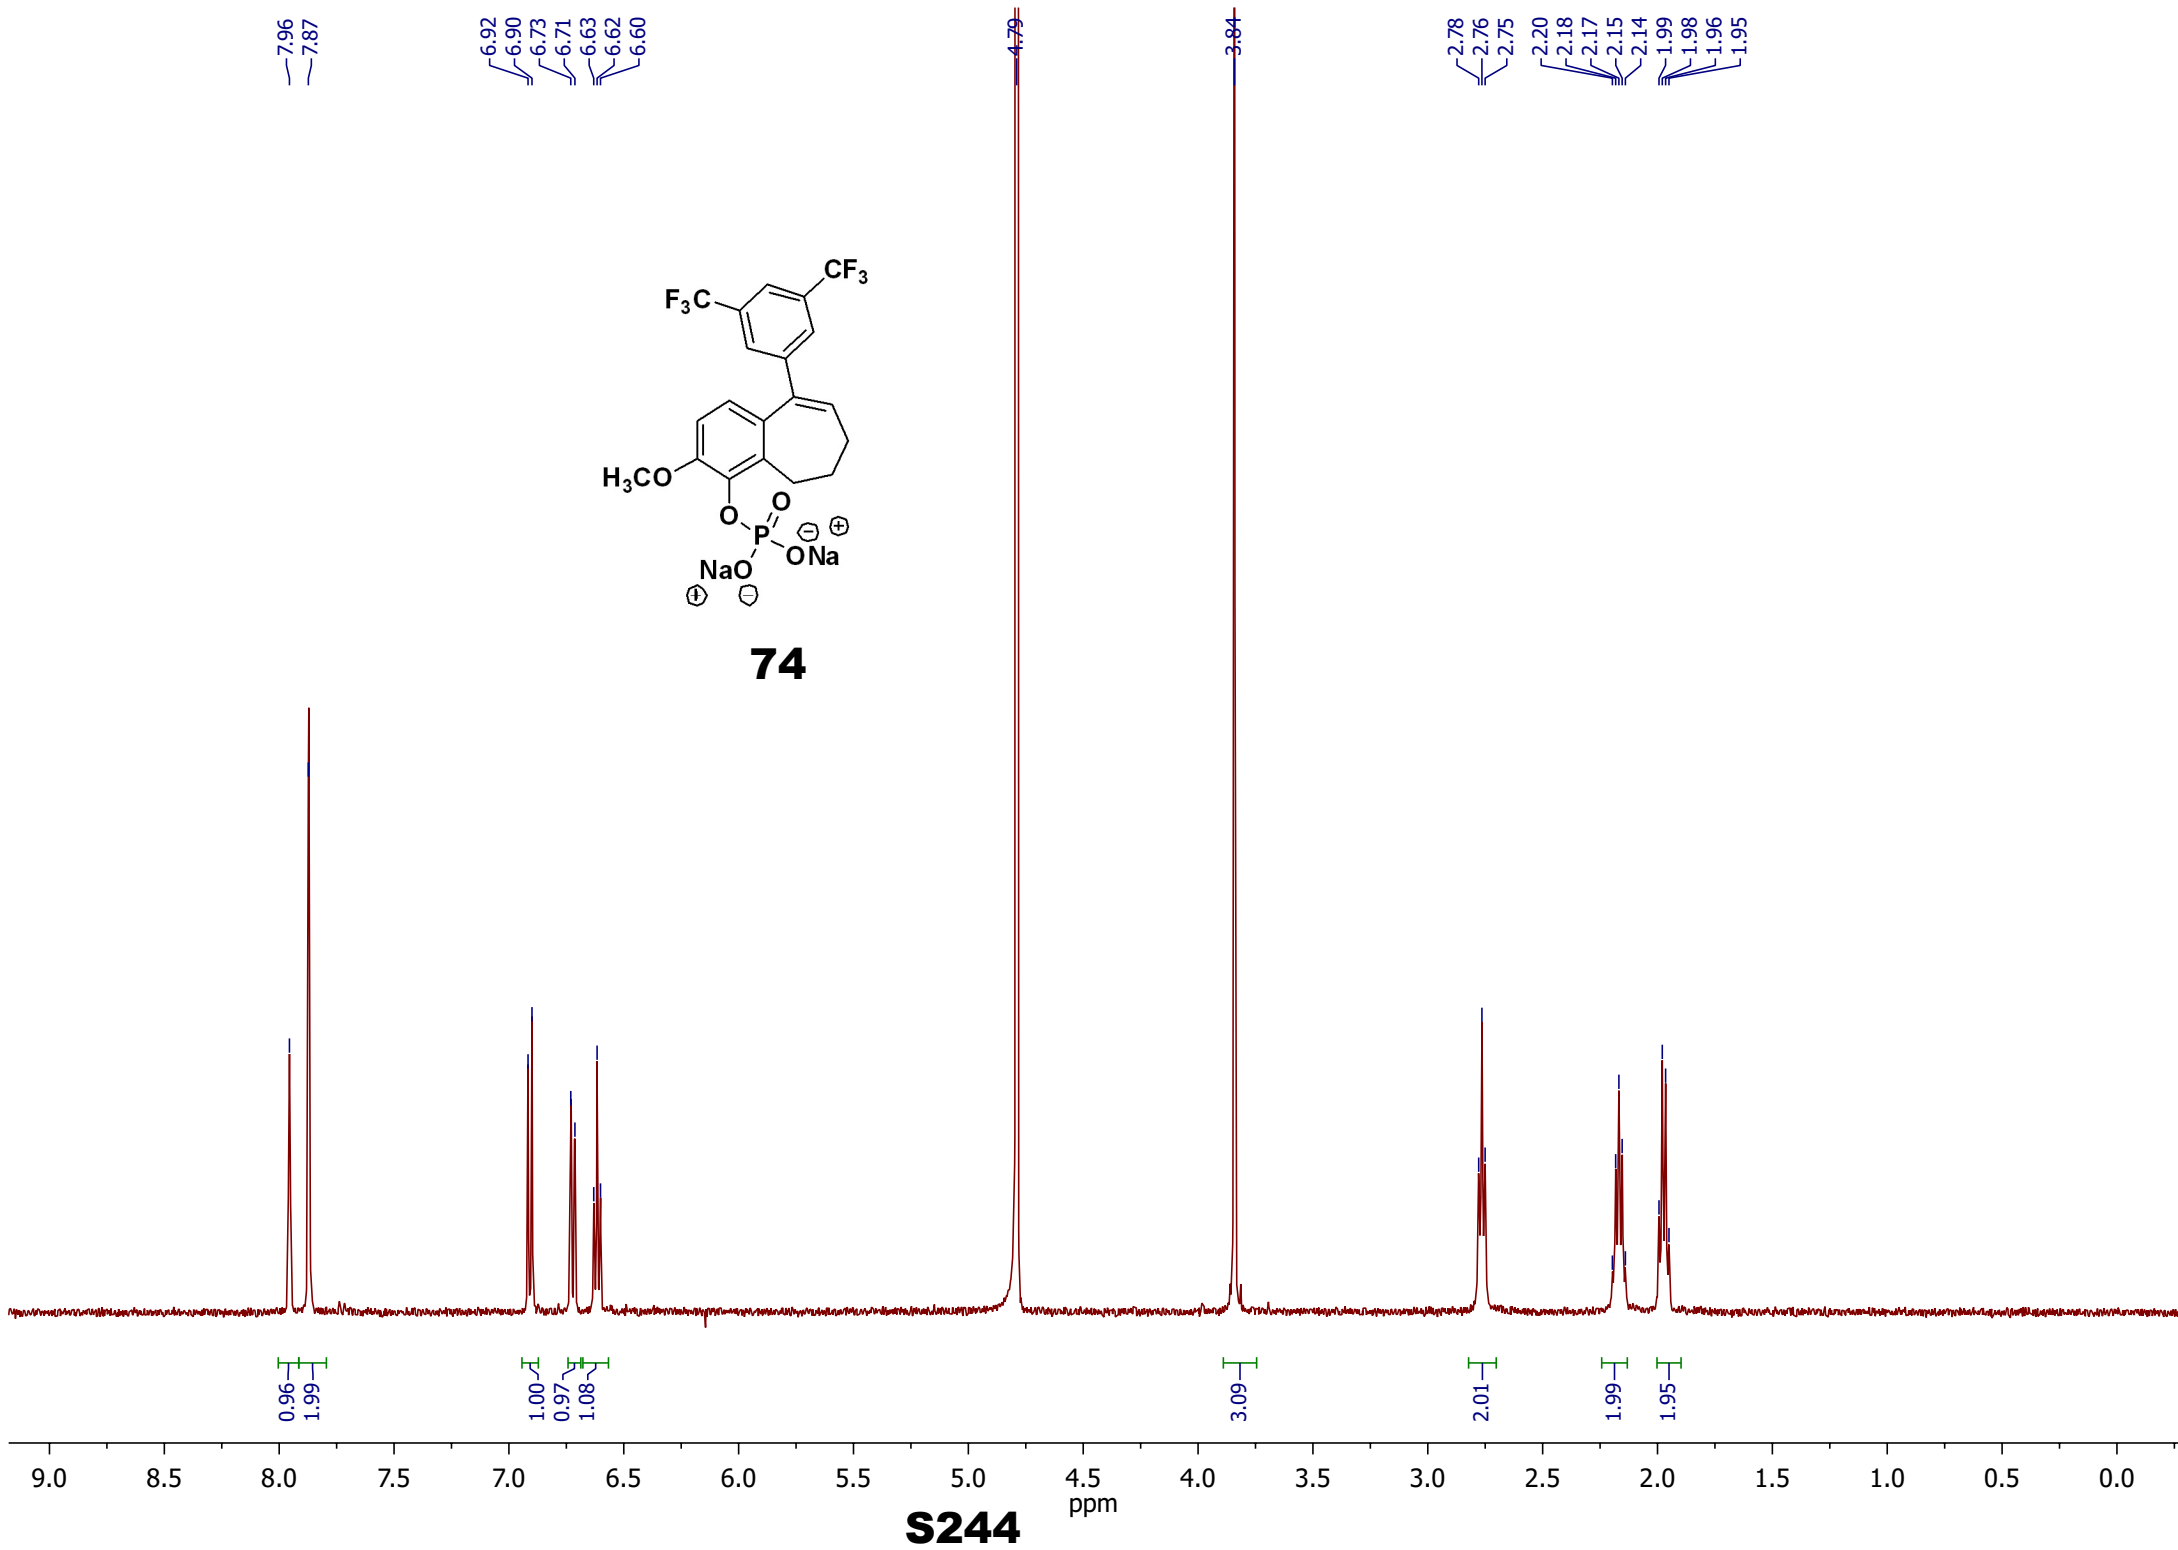

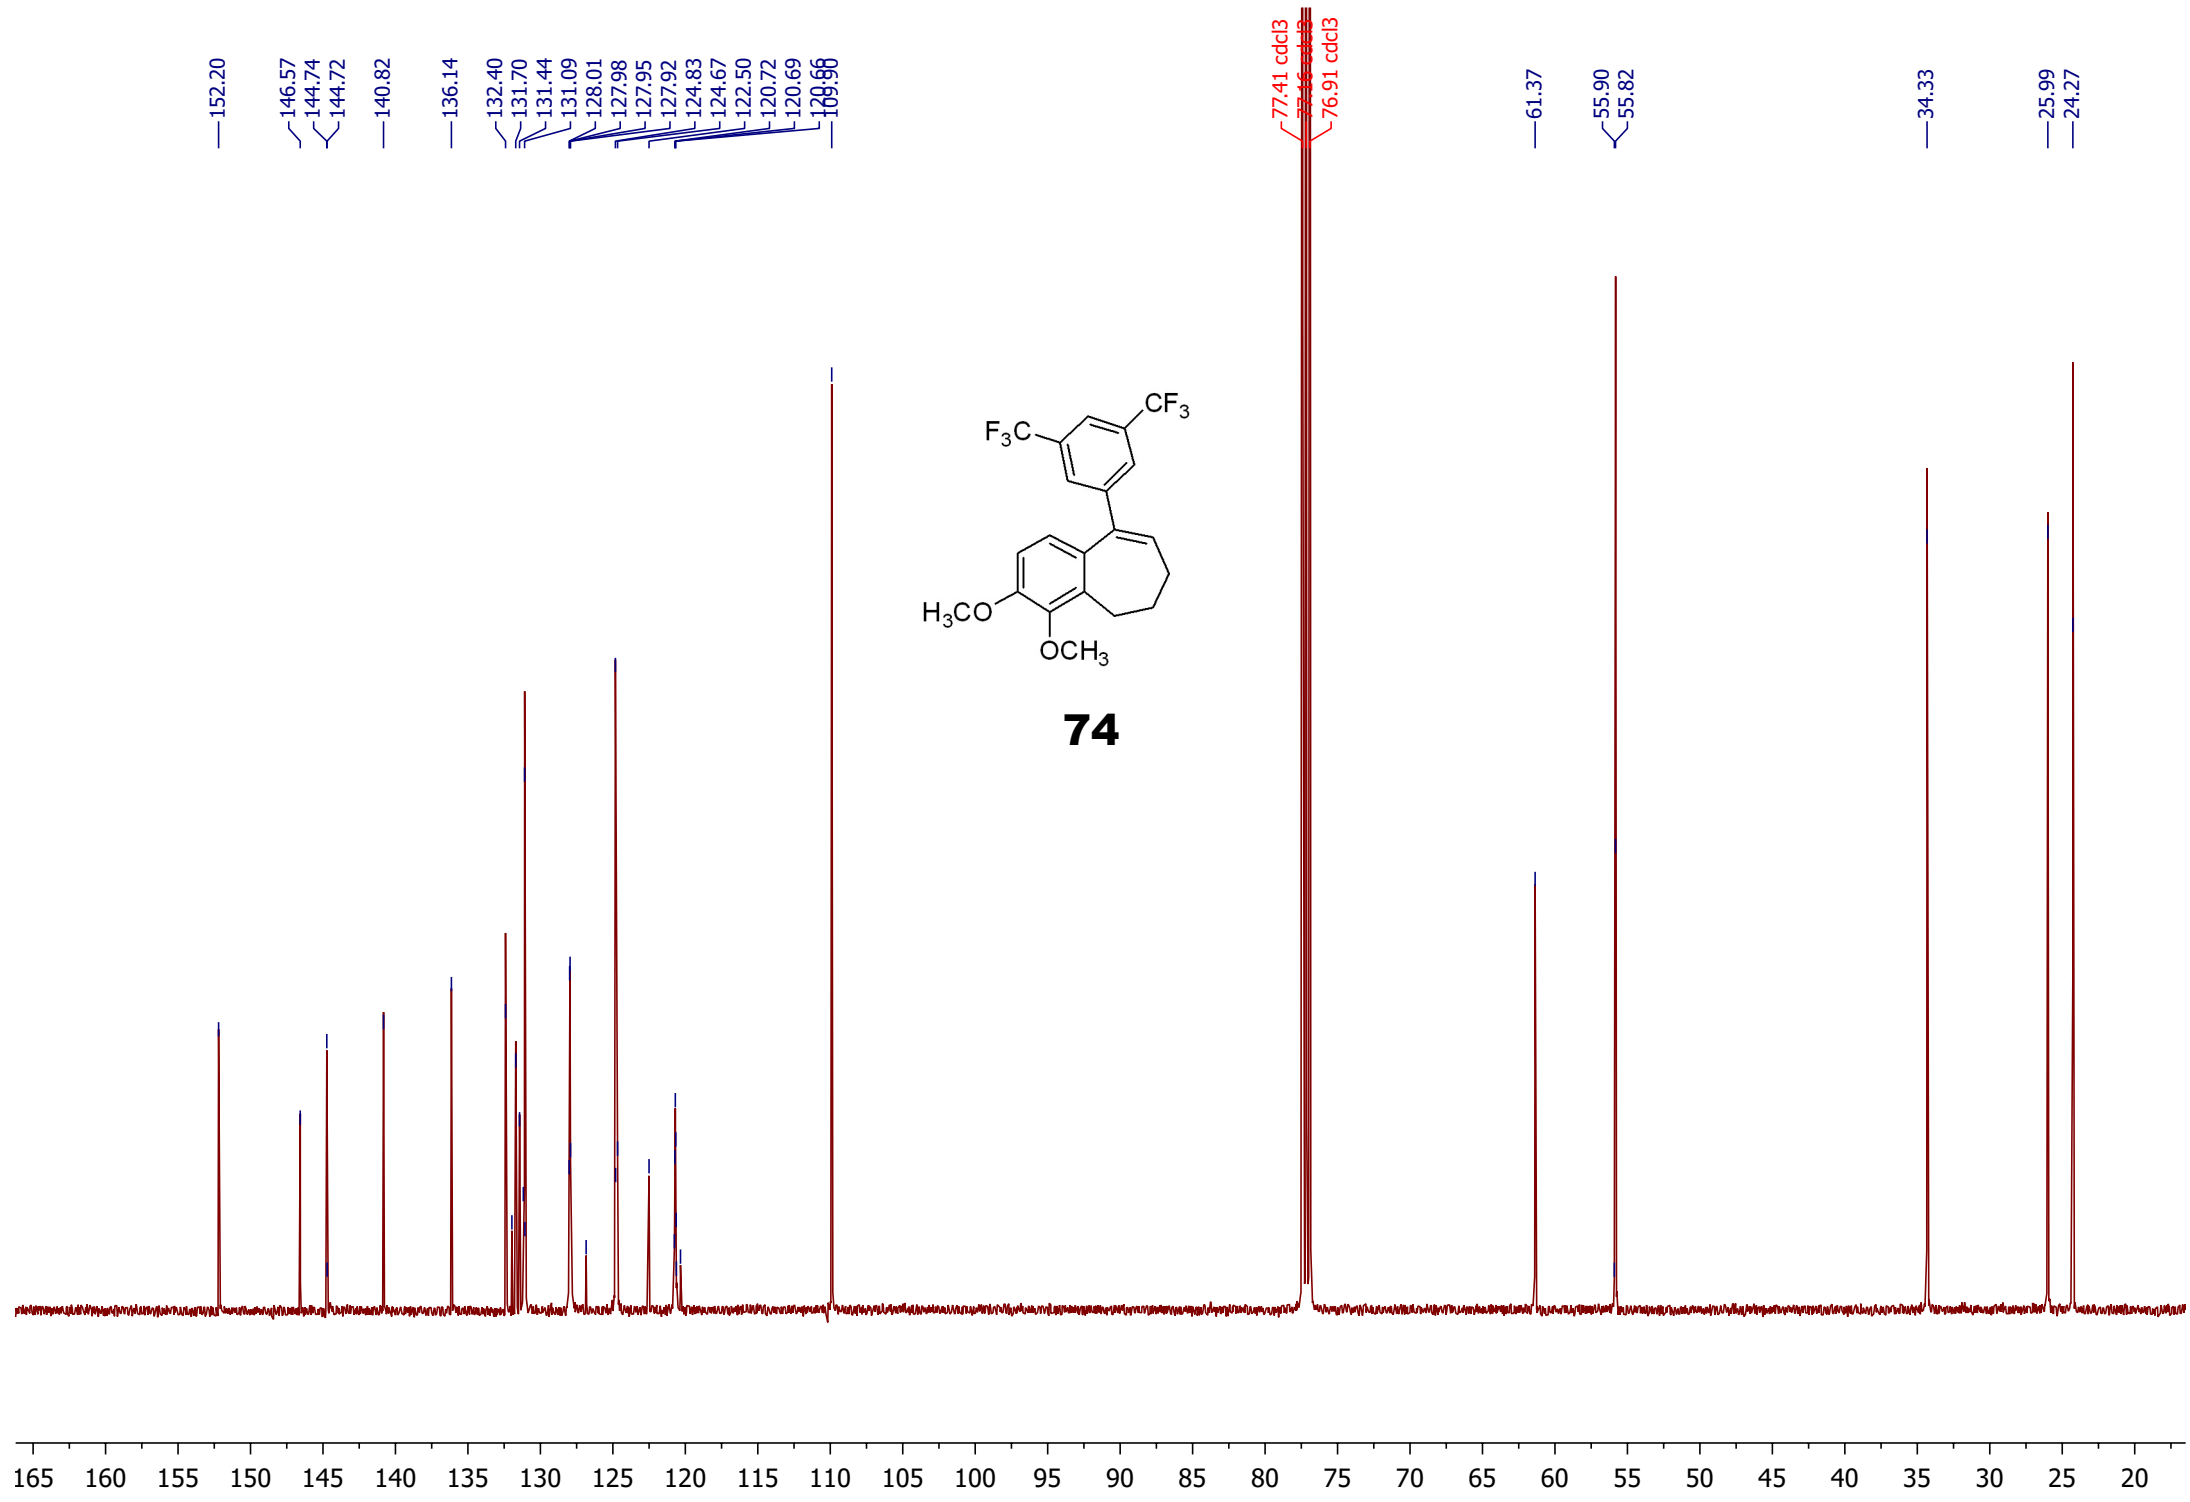

# Fluorine NMR

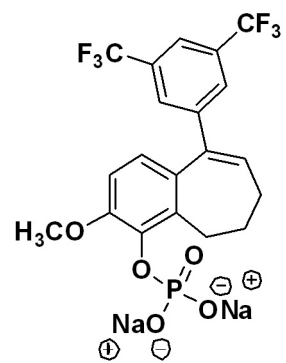

**74**

62.89

ppm

20 10 0 -10 -20 -30 -40 -50 -60 -70 -80 -90 -100 -110 -120 -130 -140 -150

**S246**

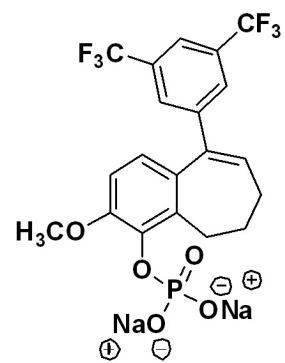

**74**

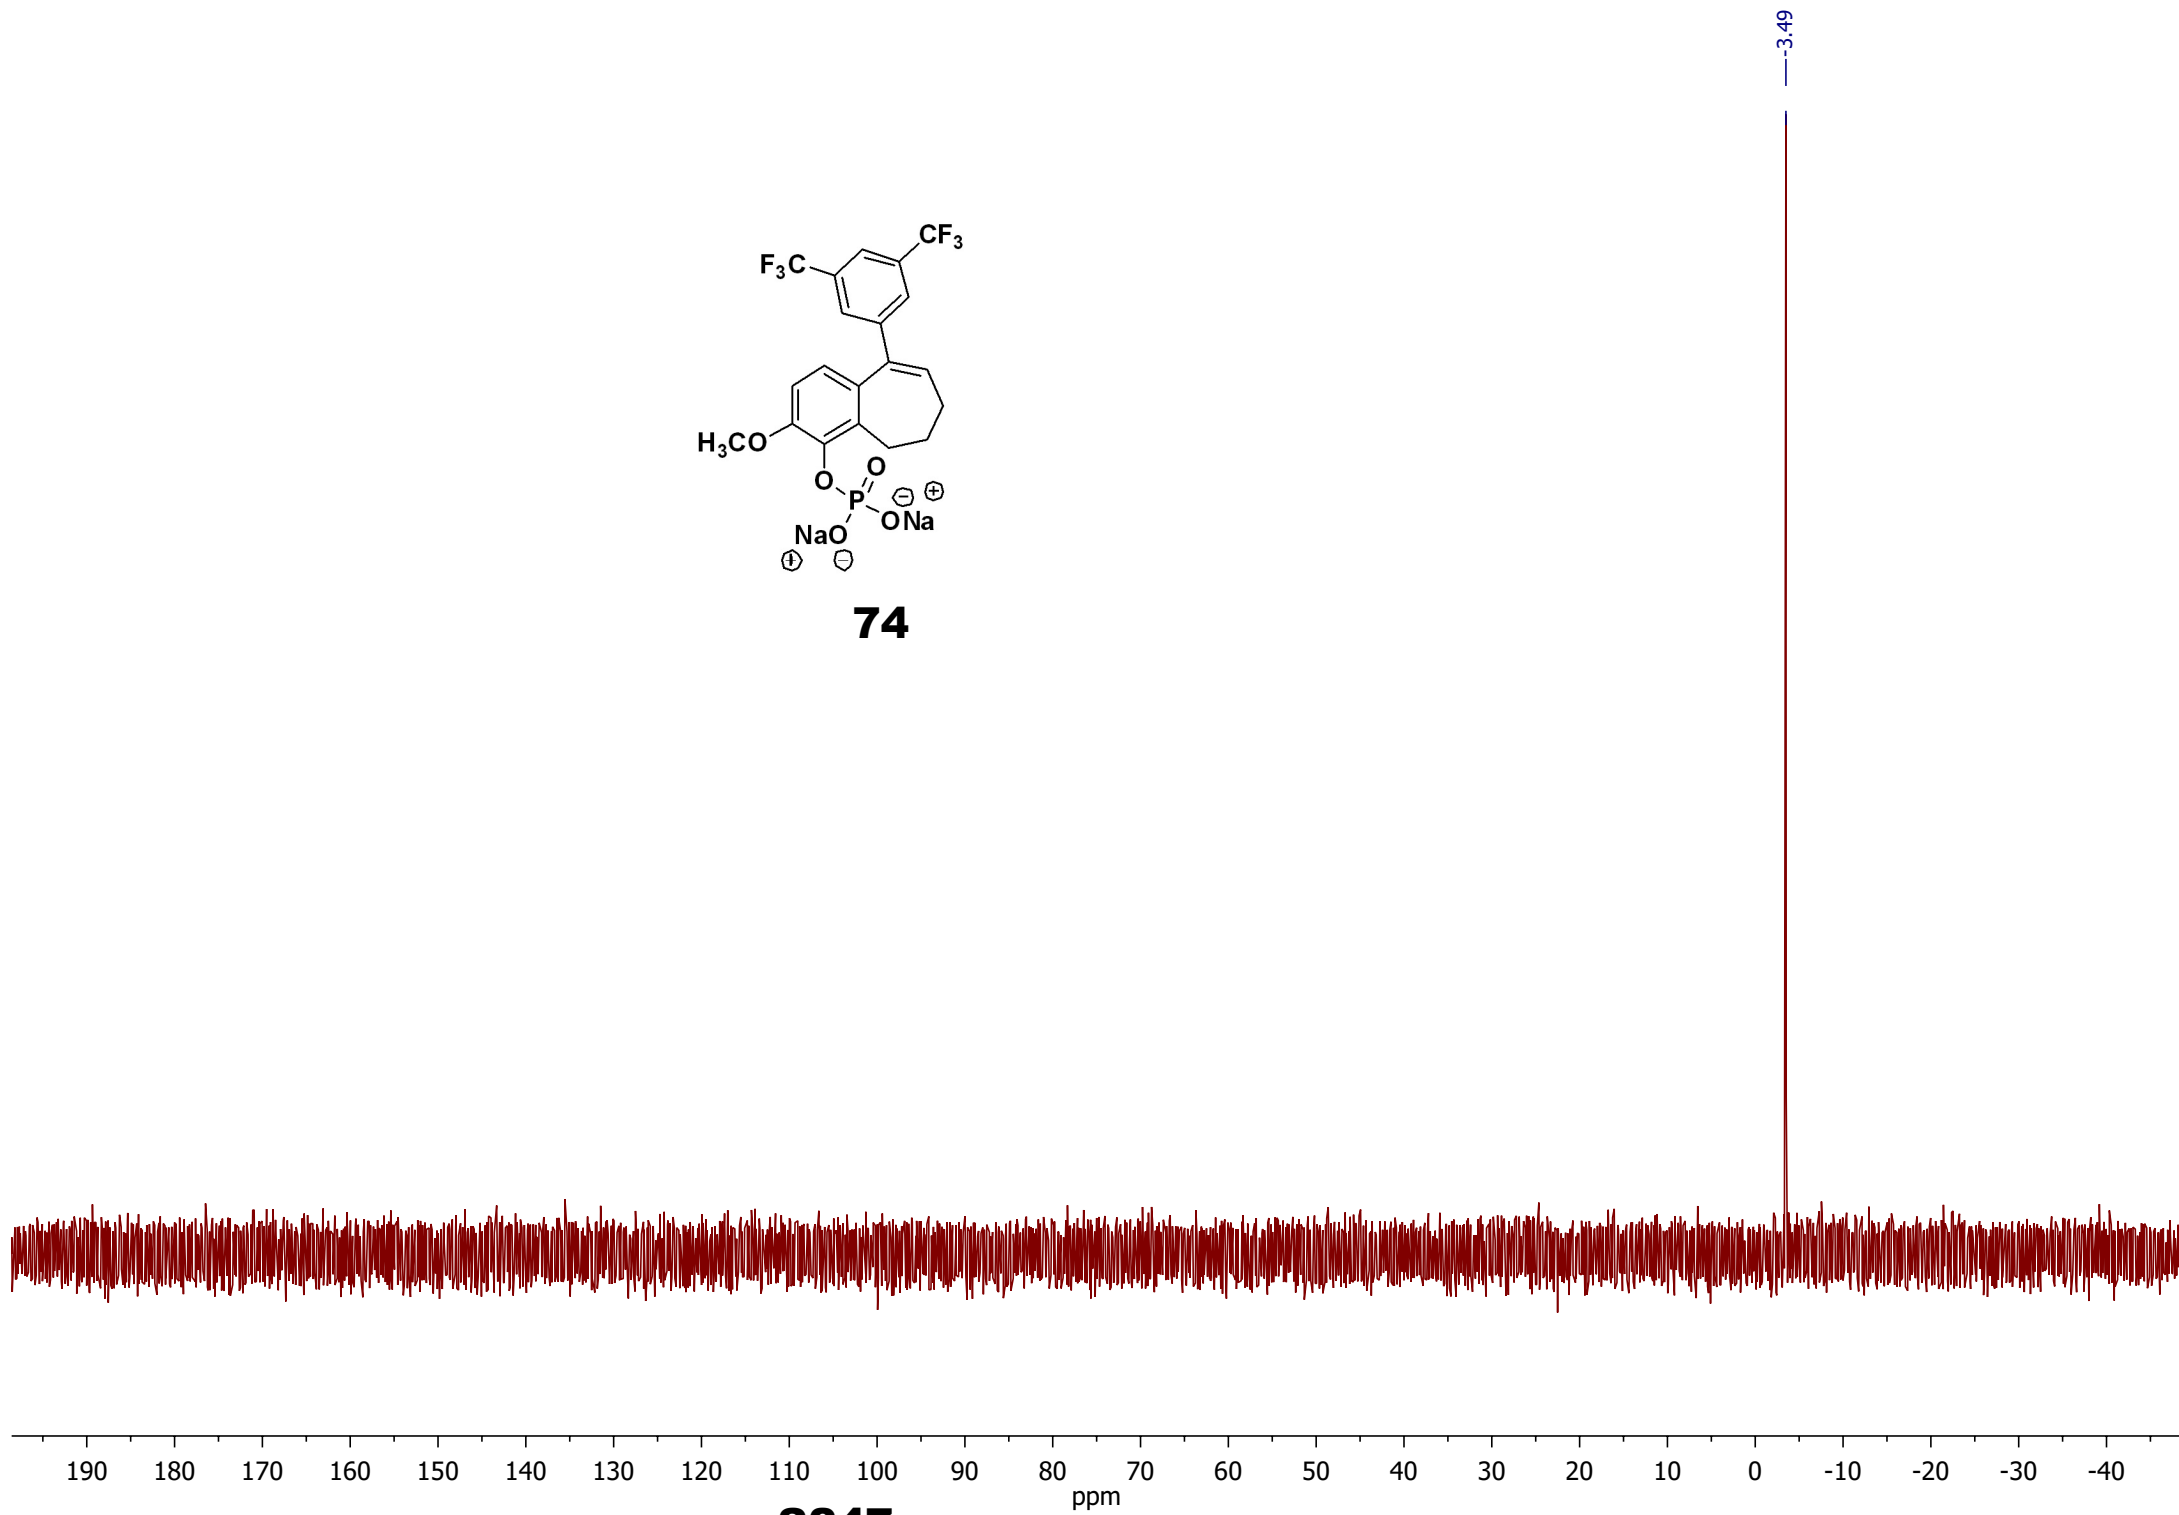

**S247**

Sample Name: CML-III-149-r2

# HPLC of compound 74

=====  
Acq. Operator : Eric Lin  
Acq. Instrument : Instrument 1 Location : -  
Injection Date : 8/4/2014 2:28:38 PM  
Acq. Method : C:\CHEM32\1\METHODS\MASTERMETHOD.M  
Last changed : 8/4/2014 1:46:20 PM by Eric Lin  
Analysis Method : C:\CHEM32\1\DATA\ERIC LIN\CML-III-149-R26.D\DA.M (MASTERMETHOD.M)  
Last changed : 8/27/2014 12:20:33 PM by Christine  
Sample Info : mastermethod

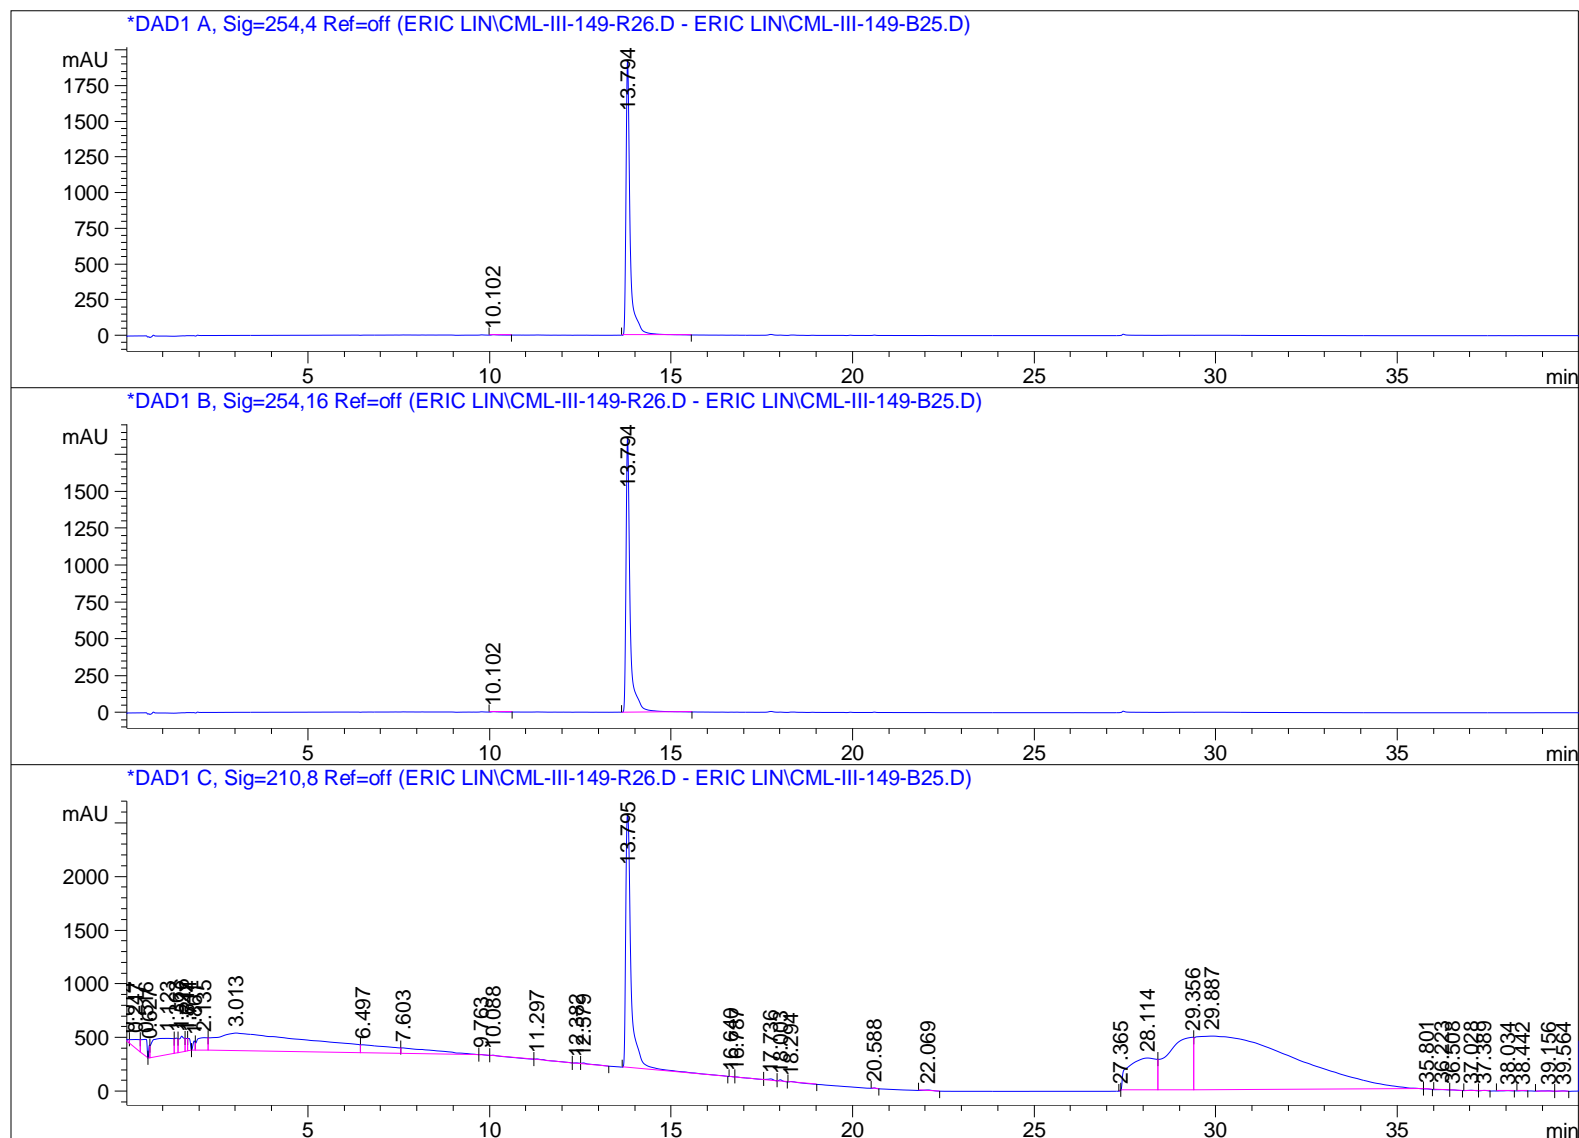**S248**



Sample Name: CML-III-149-r2

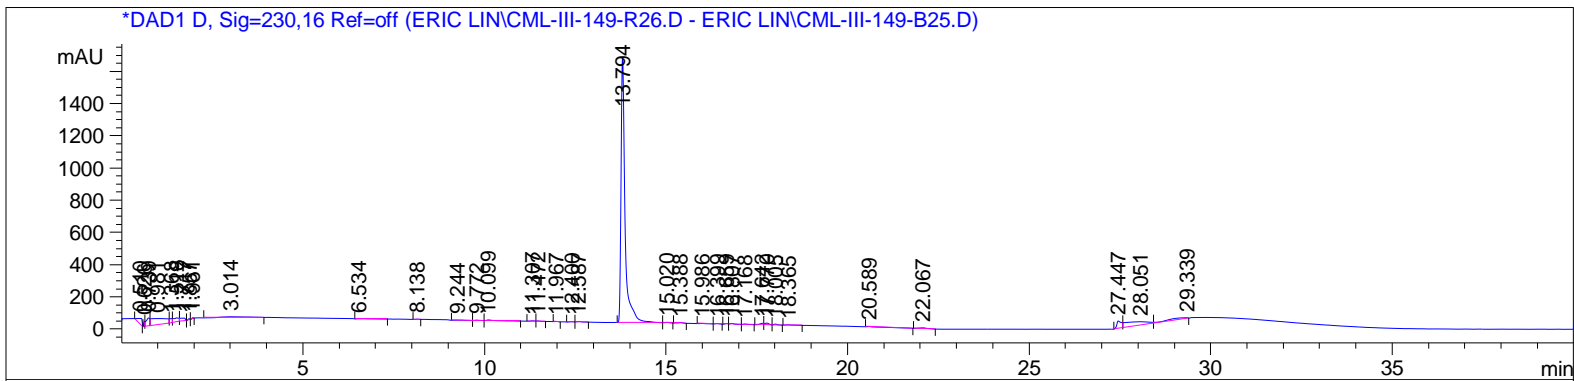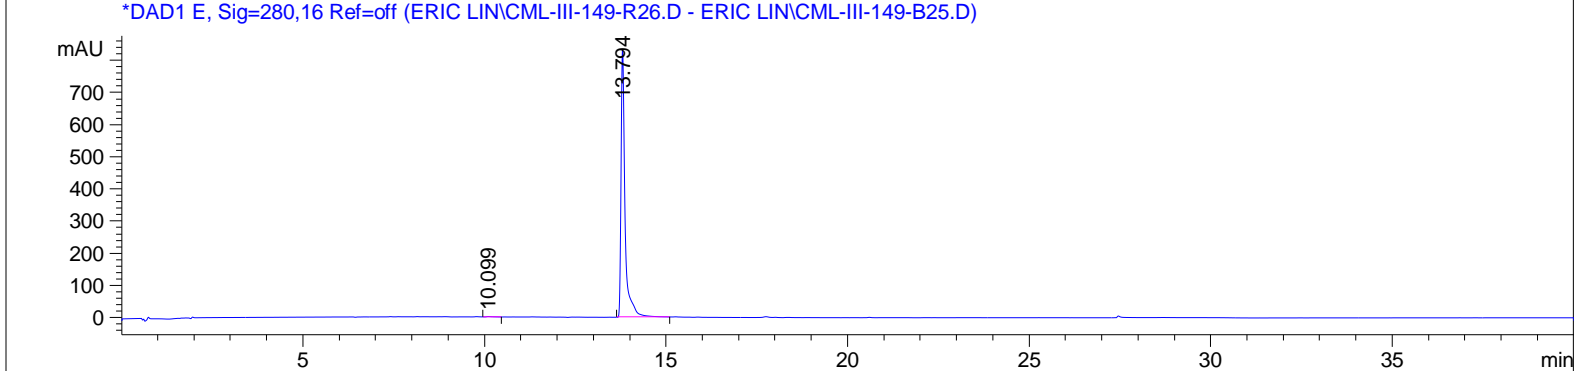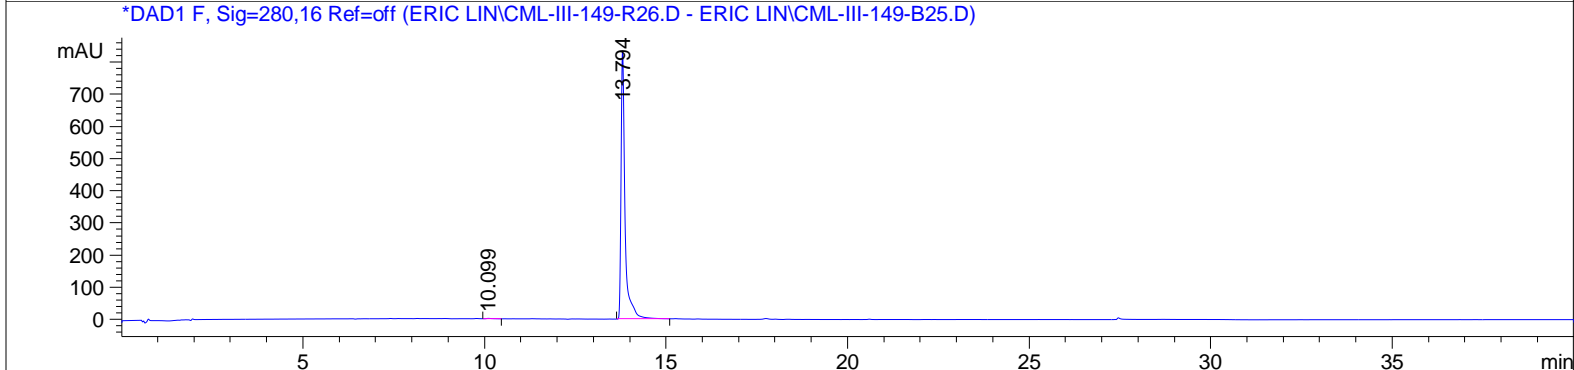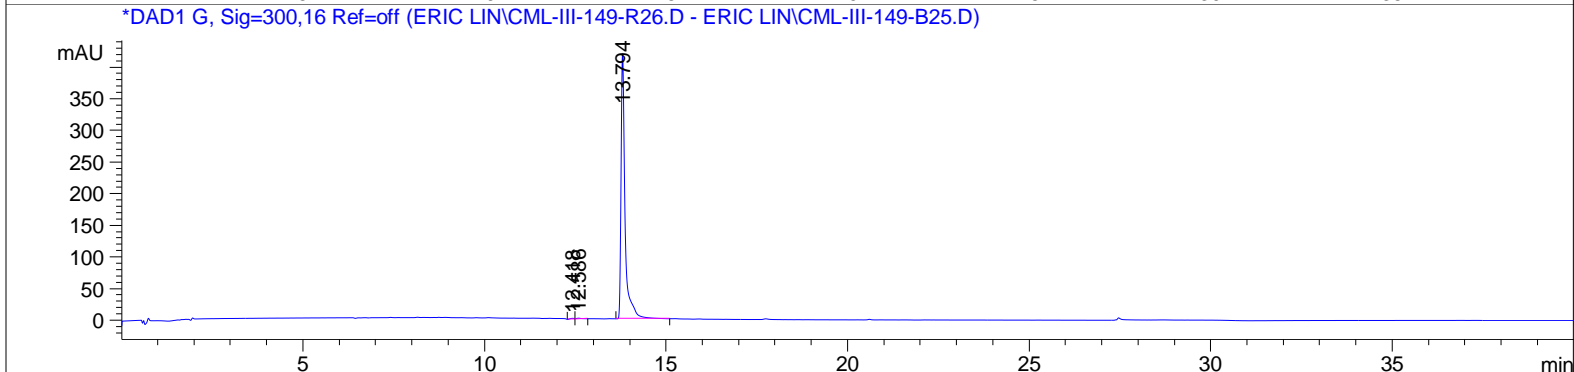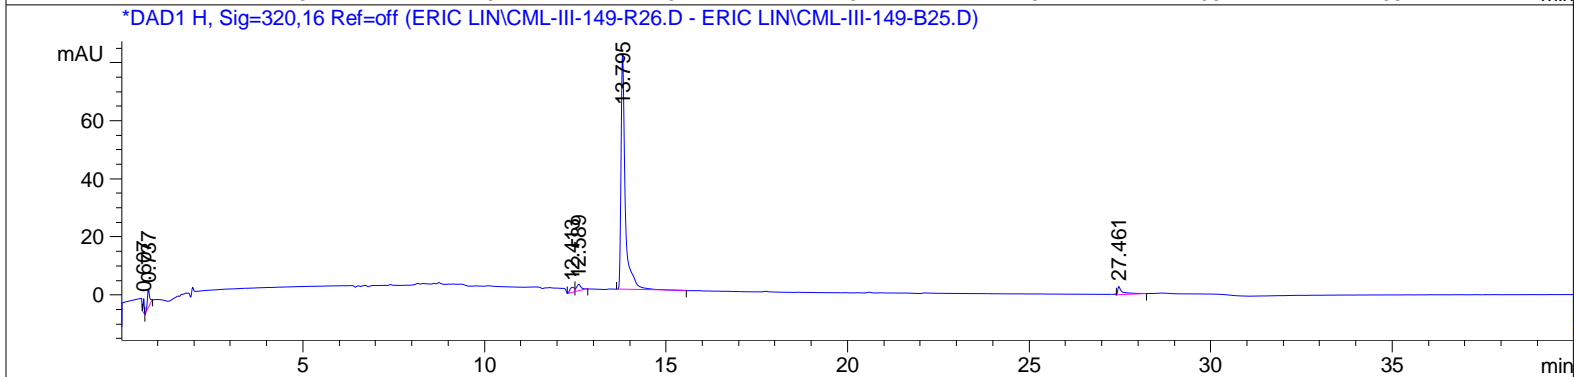

=====  
Area Percent Report  
=====

Sorted By : Signal  
Multiplier : 1.0000  
Dilution : 1.0000  
Use Multiplier & Dilution Factor with ISTDs

Signal 1: DAD1 A, Sig=254,4 Ref=off  
Signal has been modified after loading from rawdata file!

| Peak # | RetTime [min] | Type | Width [min] | Area [mAU*s] | Height [mAU] | Area %  |
|--------|---------------|------|-------------|--------------|--------------|---------|
| 1      | 10.102        | VB   | 0.1632      | 33.33345     | 2.91925      | 0.2180  |
| 2      | 13.794        | VB   | 0.1164      | 1.52597e4    | 1926.53333   | 99.7820 |

Totals : 1.52930e4 1929.45257

Signal 2: DAD1 B, Sig=254,16 Ref=off  
Signal has been modified after loading from rawdata file!

| Peak # | RetTime [min] | Type | Width [min] | Area [mAU*s] | Height [mAU] | Area %  |
|--------|---------------|------|-------------|--------------|--------------|---------|
| 1      | 10.102        | VB   | 0.1638      | 32.29185     | 2.81660      | 0.2186  |
| 2      | 13.794        | VB   | 0.1162      | 1.47398e4    | 1866.08594   | 99.7814 |

Totals : 1.47721e4 1868.90253

Signal 3: DAD1 C, Sig=210,8 Ref=off  
Signal has been modified after loading from rawdata file!

| Peak # | RetTime [min] | Type | Width [min] | Area [mAU*s] | Height [mAU] | Area % |
|--------|---------------|------|-------------|--------------|--------------|--------|
| 1      | 0.014         | BV   | 0.1264      | 116.59129    | 15.36866     | 0.0538 |
| 2      | 0.247         | VV   | 0.2472      | 1332.98865   | 78.86525     | 0.6147 |
| 3      | 0.516         | VB   | 0.1533      | 1552.54041   | 154.45248    | 0.7159 |
| 4      | 0.627         | BV   | 0.0341      | 268.13446    | 119.93959    | 0.1236 |
| 5      | 1.123         | VV   | 0.5253      | 6208.21094   | 153.02040    | 2.8628 |
| 6      | 1.363         | VV   | 0.0915      | 939.56226    | 141.51839    | 0.4333 |
| 7      | 1.516         | VV   | 0.1314      | 1505.25952   | 149.60490    | 0.6941 |
| 8      | 1.647         | VV   | 0.0561      | 475.18509    | 120.27156    | 0.2191 |
| 9      | 1.714         | VB   | 0.0678      | 516.40662    | 116.22965    | 0.2381 |
| 10     | 1.861         | BV   | 0.0728      | 400.88586    | 88.58305     | 0.1849 |
| 11     | 2.135         | VV   | 0.3148      | 2428.47144   | 120.64979    | 1.1198 |

Sample Name: CML-III-149-r2

| Peak # | RetTime [min] | Type | Width [min] | Area [mAU*s] | Height [mAU] | Area %   |
|--------|---------------|------|-------------|--------------|--------------|----------|
| 12     | 3.013         | VV   | 2.2150      | 3.12489e4    | 168.24092    | 14.4098  |
| 13     | 6.497         | VV   | 0.6875      | 4282.35107   | 75.98831     | 1.9747   |
| 14     | 7.603         | VB   | 0.7892      | 3460.69922   | 52.62601     | 1.5958   |
| 15     | 9.763         | BV   | 0.1387      | 32.96905     | 3.29470      | 0.0152   |
| 16     | 10.088        | VV   | 0.3678      | 200.97350    | 6.81970      | 0.0927   |
| 17     | 11.297        | VB   | 0.3651      | 246.68819    | 8.53868      | 0.1138   |
| 18     | 12.382        | BV   | 0.1599      | 44.04943     | 4.35936      | 0.0203   |
| 19     | 12.579        | VB   | 0.2161      | 158.32291    | 9.61325      | 0.0730   |
| 20     | 13.795        | BB   | 0.1546      | 2.43593e4    | 2356.12231   | 11.2329  |
| 21     | 16.640        | BV   | 0.0861      | 8.61282      | 1.51916      | 3.972e-3 |
| 22     | 16.787        | VV   | 0.3534      | 50.88361     | 1.79118      | 0.0235   |
| 23     | 17.736        | VV   | 0.1681      | 152.08693    | 13.23410     | 0.0701   |
| 24     | 18.003        | VB   | 0.0973      | 85.28777     | 13.21263     | 0.0393   |
| 25     | 18.294        | BB   | 0.1673      | 79.26408     | 6.19386      | 0.0366   |
| 26     | 20.588        | BB   | 0.0775      | 27.55946     | 5.59449      | 0.0127   |
| 27     | 22.069        | BB   | 0.2297      | 115.85145    | 7.27799      | 0.0534   |
| 28     | 27.365        | BB   | 0.0195      | 6.61201      | 5.81724      | 3.049e-3 |
| 29     | 28.114        | BV   | 0.7154      | 1.57789e4    | 300.12476    | 7.2761   |
| 30     | 29.356        | VV   | 0.7563      | 2.42025e4    | 491.68054    | 11.1606  |
| 31     | 29.887        | VB   | 2.3219      | 9.61836e4    | 501.41739    | 44.3533  |
| 32     | 35.801        | BB   | 0.1517      | 22.13400     | 2.31238      | 0.0102   |
| 33     | 36.223        | BV   | 0.2609      | 55.02095     | 3.04299      | 0.0254   |
| 34     | 36.508        | VB   | 0.1819      | 36.04284     | 3.00632      | 0.0166   |
| 35     | 37.028        | BV   | 0.1866      | 53.60883     | 4.38545      | 0.0247   |
| 36     | 37.389        | VB   | 0.1591      | 49.88113     | 5.14453      | 0.0230   |
| 37     | 38.034        | VB   | 0.1951      | 36.97443     | 2.81737      | 0.0171   |
| 38     | 38.442        | BB   | 0.1327      | 14.78003     | 1.82136      | 6.816e-3 |
| 39     | 39.156        | BB   | 0.2580      | 71.35019     | 3.96372      | 0.0329   |
| 40     | 39.564        | BB   | 0.2068      | 48.35715     | 4.00710      | 0.0223   |

Totals : 2.16858e5 5322.47151

Signal 4: DAD1 D, Sig=230,16 Ref=off

Signal has been modified after loading from rawdata file!

| Peak # | RetTime [min] | Type | Width [min] | Area [mAU*s] | Height [mAU] | Area % |
|--------|---------------|------|-------------|--------------|--------------|--------|
| 1      | 0.510         | BB   | 0.1227      | 281.79205    | 33.32289     | 1.5359 |
| 2      | 0.626         | BV   | 0.0323      | 62.86551     | 30.14817     | 0.3426 |
| 3      | 0.739         | VV   | 0.1042      | 377.07275    | 48.78299     | 2.0552 |
| 4      | 0.981         | VV   | 0.3857      | 1086.44214   | 37.98767     | 5.9214 |
| 5      | 1.368         | VV   | 0.0797      | 151.39351    | 26.08789     | 0.8251 |
| 6      | 1.518         | VV   | 0.1373      | 272.69882    | 25.79583     | 1.4863 |
| 7      | 1.717         | VB   | 0.1341      | 182.61948    | 18.04617     | 0.9953 |
| 8      | 1.857         | BB   | 0.0617      | 27.95403     | 7.81287      | 0.1524 |
| 9      | 1.961         | BB   | 0.0545      | 20.80817     | 5.99101      | 0.1134 |
| 10     | 3.014         | BB   | 0.6050      | 267.75238    | 5.56837      | 1.4593 |

Sample Name: CML-III-149-r2

| Peak # | RetTime [min] | Type | Width [min] | Area [mAU*s] | Height [mAU] | Area %  |
|--------|---------------|------|-------------|--------------|--------------|---------|
| 11     | 6.534         | BV   | 0.3767      | 57.15169     | 1.91202      | 0.3115  |
| 12     | 8.138         | BB   | 0.0794      | 5.82987      | 1.14436      | 0.0318  |
| 13     | 9.244         | BV   | 0.3169      | 31.18376     | 1.26792      | 0.1700  |
| 14     | 9.772         | VV   | 0.1416      | 27.56984     | 2.68903      | 0.1503  |
| 15     | 10.099        | VB   | 0.2091      | 71.74109     | 4.67413      | 0.3910  |
| 16     | 11.307        | BV   | 0.1256      | 22.51918     | 2.69070      | 0.1227  |
| 17     | 11.472        | VB   | 0.1012      | 16.75818     | 2.46791      | 0.0913  |
| 18     | 11.967        | VB   | 0.0976      | 9.49871      | 1.50531      | 0.0518  |
| 19     | 12.400        | BV   | 0.1513      | 21.66013     | 2.31095      | 0.1181  |
| 20     | 12.587        | VB   | 0.1309      | 38.09042     | 4.15847      | 0.2076  |
| 21     | 13.794        | VV   | 0.1147      | 1.28217e4    | 1649.89600   | 69.8822 |
| 22     | 15.020        | VB   | 0.1292      | 30.51363     | 3.66408      | 0.1663  |
| 23     | 15.388        | BB   | 0.1131      | 32.63912     | 4.37035      | 0.1779  |
| 24     | 15.986        | BV   | 0.2081      | 21.80622     | 1.47846      | 0.1189  |
| 25     | 16.399        | VB   | 0.1185      | 27.55081     | 3.40261      | 0.1502  |
| 26     | 16.659        | BV   | 0.0876      | 26.69537     | 4.74829      | 0.1455  |
| 27     | 16.807        | VB   | 0.1090      | 40.28115     | 5.52840      | 0.2195  |
| 28     | 17.168        | BB   | 0.1287      | 25.67058     | 2.86103      | 0.1399  |
| 29     | 17.642        | BV   | 0.1179      | 75.71060     | 9.61090      | 0.4126  |
| 30     | 17.770        | VV   | 0.1174      | 90.70266     | 11.33053     | 0.4944  |
| 31     | 18.005        | VB   | 0.1042      | 39.87554     | 5.66185      | 0.2173  |
| 32     | 18.365        | BB   | 0.1760      | 27.57606     | 2.03578      | 0.1503  |
| 33     | 20.589        | BB   | 0.1915      | 38.05714     | 2.58892      | 0.2074  |
| 34     | 22.067        | BB   | 0.2146      | 74.61647     | 4.87451      | 0.4067  |
| 35     | 27.447        | BV   | 0.1212      | 421.20547    | 46.70127     | 2.2957  |
| 36     | 28.051        | VV   | 0.6665      | 1109.79724   | 22.15031     | 6.0487  |
| 37     | 29.339        | VB   | 1.1831      | 409.78696    | 4.76587      | 2.2335  |

Totals : 1.83476e4 2050.03383

Signal 5: DAD1 E, Sig=280,16 Ref=off

Signal has been modified after loading from rawdata file!

| Peak # | RetTime [min] | Type | Width [min] | Area [mAU*s] | Height [mAU] | Area %  |
|--------|---------------|------|-------------|--------------|--------------|---------|
| 1      | 10.099        | BB   | 0.1567      | 12.72469     | 1.13608      | 0.1970  |
| 2      | 13.794        | BB   | 0.1140      | 6446.57959   | 835.78650    | 99.8030 |

Totals : 6459.30428 836.92258

Sample Name: CML-III-149-r2

Signal 6: DAD1 F, Sig=280,16 Ref=off

Signal has been modified after loading from rawdata file!

| Peak # | RetTime [min] | Type | Width [min] | Area [mAU*s] | Height [mAU] | Area %  |
|--------|---------------|------|-------------|--------------|--------------|---------|
| 1      | 10.099        | BB   | 0.1567      | 12.72469     | 1.13608      | 0.1970  |
| 2      | 13.794        | BB   | 0.1140      | 6446.57959   | 835.78650    | 99.8030 |

Totals :                                   6459.30428   836.92258

Signal 7: DAD1 G, Sig=300,16 Ref=off

Signal has been modified after loading from rawdata file!

| Peak # | RetTime [min] | Type | Width [min] | Area [mAU*s] | Height [mAU] | Area %  |
|--------|---------------|------|-------------|--------------|--------------|---------|
| 1      | 12.418        | BV   | 0.1436      | 13.22460     | 1.48978      | 0.4033  |
| 2      | 12.586        | VB   | 0.1478      | 14.48388     | 1.36451      | 0.4417  |
| 3      | 13.794        | BB   | 0.1144      | 3251.21021   | 419.63831    | 99.1550 |

Totals :                                   3278.91869   422.49259

Signal 8: DAD1 H, Sig=320,16 Ref=off

Signal has been modified after loading from rawdata file!

| Peak # | RetTime [min] | Type | Width [min] | Area [mAU*s] | Height [mAU] | Area %  |
|--------|---------------|------|-------------|--------------|--------------|---------|
| 1      | 0.607         | BB   | 0.0301      | 9.38681      | 4.94999      | 1.2174  |
| 2      | 0.737         | BB   | 0.0659      | 29.25878     | 6.58113      | 3.7946  |
| 3      | 12.413        | BV   | 0.1398      | 15.82891     | 1.84999      | 2.0529  |
| 4      | 12.589        | VB   | 0.1340      | 22.26375     | 2.36228      | 2.8874  |
| 5      | 13.795        | BB   | 0.1197      | 664.22479    | 80.99686     | 86.1439 |
| 6      | 27.461        | BB   | 0.1347      | 30.10082     | 2.90944      | 3.9038  |

Totals :                                   771.06386   99.64970

=====  
\*\*\* End of Report \*\*\*

# HRMS of compound 74

C:\Xcalibur\...CML\_III\_141\_Orbi\_+ESI

7/23/2014 4:29:51 PM

CML\_III\_141

CML\_III\_141\_Orbi\_+ESI #12 RT: 0.09 AV: 1 NL  
T: FTMS + p ESI Full ms [100.00-1000.00]

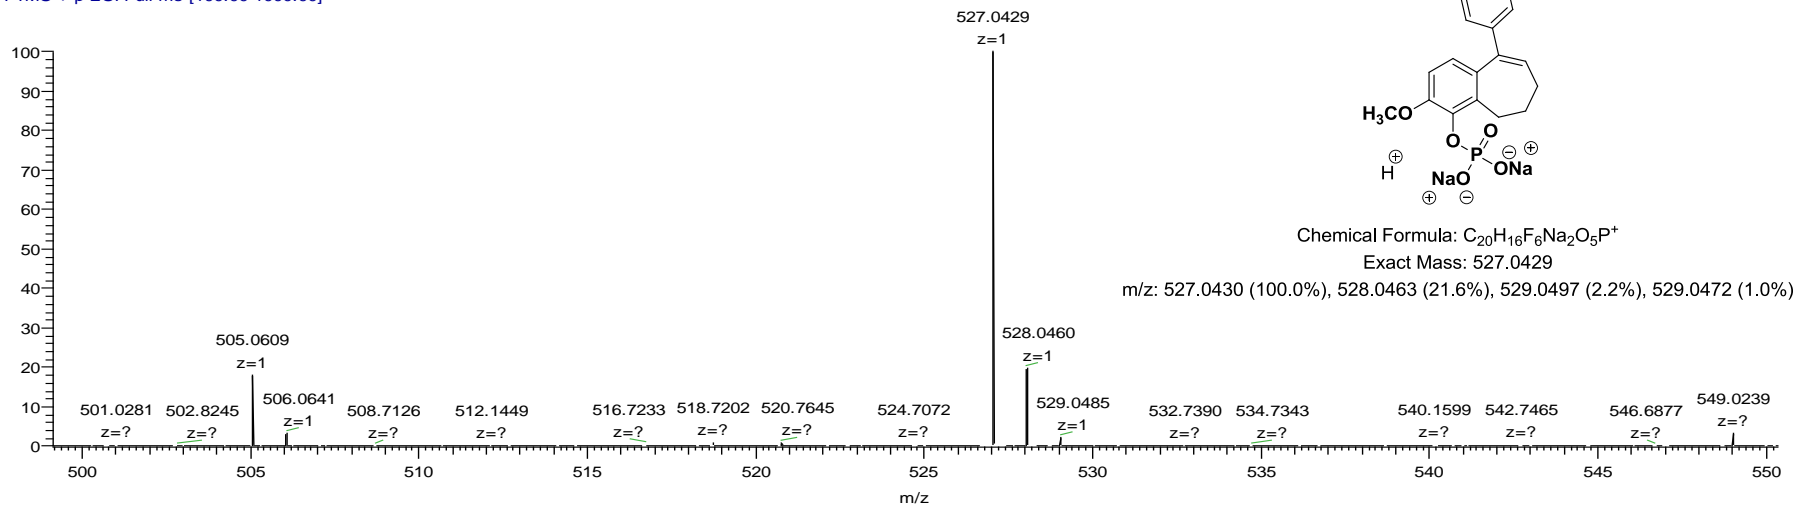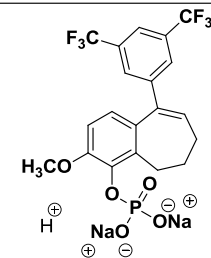

Chemical Formula:  $C_{20}H_{16}F_6Na_2O_5P^+$

Exact Mass: 527.0429

m/z: 527.0430 (100.0%), 528.0463 (21.6%), 529.0497 (2.2%), 529.0472 (1.0%)

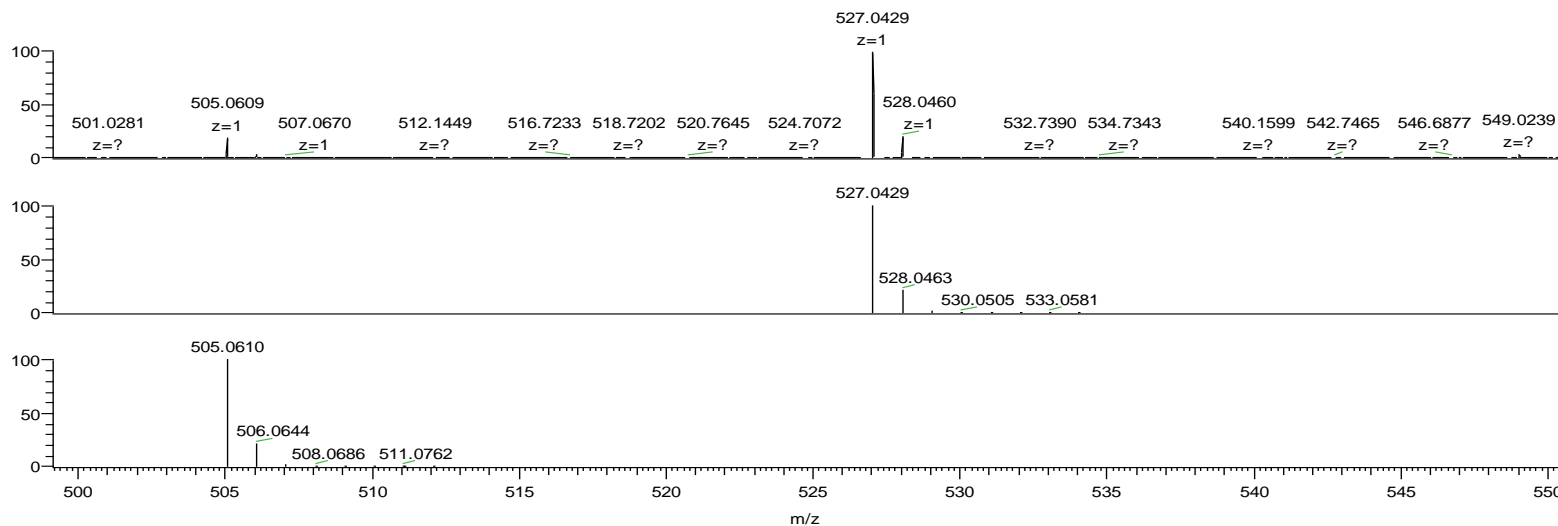

NL:  
1.82E7  
CML\_III\_141\_Orbi\_+  
ESI#12 RT: 0.09 AV: 1 T:  
FTMS + p ESI Full ms  
[100.00-1000.00]

NL:  
7.95E5  
 $C_{20}H_{15}F_6Na_2O_5P + H:$   
 $C_{20}H_{15}F_6Na_2O_5P_1$   
pa Chrg 1

NL:  
7.95E5  
 $C_{20}H_{15}F_6NaO_5P + H:$   
 $C_{20}H_{17}F_6Na_1O_5P_1$   
pa Chrg 1

## Alternative Synthesis for Compound 30

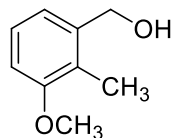

### 3-Methoxy-2-methylbenzoic acid

To a well-stirred and pre-cooled 0° C solution of 3-methoxy-2-methylbenzoic acid (500 mg, 3 mmol) in THF (150 mL), LiAlH<sub>4</sub> (1.13 mL, 2.0 M) was added, and the reaction was stirred warming from 0° C to room temperature over 12 h. The reaction mixture was quenched with 7 mL of 20% H<sub>2</sub>O in THF added dropwise, and then 10 mL of 15-20% NaOH was added. After filtering through Celite®, the filtrate was extracted with EtOAc (3 x 50 mL). The combined organic phase was dried with Na<sub>2</sub>SO<sub>4</sub>, filtered, and concentrated under reduced pressure. The crude product was purified by flash chromatography using a prepacked 100 g silica column [solvent A: EtOAc; solvent B: hexanes; gradient: 7% A/ 93% B (3 CV), 7% A/ 93% B → 60% A/ 40% B (10 CV), 60% A/ 40% B (1 CV); flow rate: 25 mL/min; monitored at 254 and 280 nm] affording the alcohol (0.40 g, 2.67mmol, 89%) as a white powder. <sup>1</sup>H NMR (CDCl<sub>3</sub>, 500 MHz) δ 7.17 (1H, dd, *J* = 5.0 Hz, 10.0 Hz), 6.97 (1H, d, *J* = 5.0 Hz), 6.82 (1H, d, *J* = 10.0 Hz), 4.66 (2H, s), 3.83 (3H, s), 2.21 (3H, s). <sup>13</sup>C NMR (CDCl<sub>3</sub>, 125 MHz) δ 157.7, 139.9, 126.3, 124.7, 120.0, 109.8, 63.5, 55.6, 10.8.

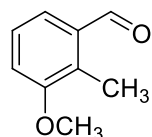

### 3-Methoxy-2-methylbenzaldehyde

To a well-stirred pyridinium chlorochromate (PCC) in CH<sub>2</sub>Cl<sub>2</sub> (40 mL) solution, (3-methoxy-2-methylphenyl)methanol (3.22 g, 21.2 mmol) dissolved in CH<sub>2</sub>Cl<sub>2</sub> (25 mL) was slowly added. The reaction mixture was stirred at room temperature for 12 h. The mixture was filtered through Celite®, and the Celite® was washed thoroughly with CH<sub>2</sub>Cl<sub>2</sub> (2 x 30 mL). The filtrate was concentrated under reduced pressure and purified by flash chromatography using a prepacked 100 g silica column [solvent A: EtOAc; solvent B: hexanes; gradient: 7% A/ 93% B (3 CV), 7% A/ 93% B → 60% A/ 40% B (10 CV), 60% A/ 40% B (1 CV); flow rate: 25 mL/min; monitored at 254 and 280 nm] affording the aldehyde (2.70 g, 18 mmol, 85%) as a colorless oil. <sup>1</sup>H NMR (CDCl<sub>3</sub>, 500 MHz) δ 10.31 (1H, s), 7.41 (1H, d, *J* = 10.0 Hz), 7.30 (1H, dd, *J* = 5.0 Hz, 10.0 Hz), 7.06 (1H, d, *J* = 10.0 Hz), 3.86 (3H, s), 2.53 (3H, s). <sup>13</sup>C NMR (CDCl<sub>3</sub>, 125 MHz) δ 192.7, 158.1, 135.1, 129.6, 126.6, 123.0, 115.2, 55.9, 10.4.

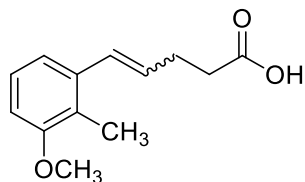

### 5-(3'-methoxy-2'-methylphenyl)pent-4-enoic acid

A mixture of 3-(carboxypropyl)triphenylphosphonium bromide (7.8 g, 18.2 mmol) and potassium *tert*-butoxide (4.5 g, 40.1 mmol) in THF (150 mL) was stirred for 1 h at room temperature. A 3-methoxy-2-methylbenzaldehyde (2.70 g, 18 mmol) solution in THF (20 mL) was added dropwise to the reaction mixture. The reaction was quenched with 2 M HCl (30 mL), then extracted with EtOAc (3 x 50 mL). The organic extract was washed with brine, dried with Na<sub>2</sub>SO<sub>4</sub>, concentrated under reduced pressure, and then purified by flash chromatography using a prepacked 100 g silica column [solvent A: EtOAc; solvent B: hexanes; gradient: 7% A/ 93% B (3 CV), 7% A/ 93% B → 60% A/ 40% B (10 CV), 60% A/ 40% B (1 CV); flow rate: 25 mL/min; monitored at 254 and 280 nm] affording 5-(3'-methoxy-2'-methylphenyl)pent-4-enoic acid (*E* & *Z*) (3.04 g, 13.8 mmol, 75%) as a pale yellow oil. NMR data was collected after the next step.

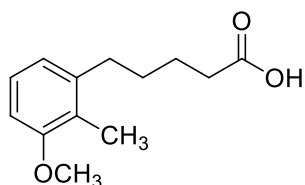

### 5-(3'-methoxy-2'-methylphenyl)pentanoic acid

5-(3'-Methoxy-2'-methylphenyl)pent-4-enoic acid (3.04 g, 13.8 mmol) was mixed with Pd/C powder quickly, and the reaction vessel was purged with nitrogen. Methanol (40 mL) was slowly added, and the reaction vessel was purged again with nitrogen. The reaction was stirred for 12 h at room temperature. The suspension was filtered through Celite®, and the Celite® was rinsed with EtOAc. The filtrate (combined MeOH and EtOAc) was concentrated under reduced pressure and purified by flash chromatography using a prepacked 100 g silica column [solvent A: EtOAc; solvent B: hexanes; gradient: 7% A/ 93% B (3 CV), 7% A/ 93% B → 60% A/ 40% B (10 CV), 60% A/ 40% B (1 CV); flow rate: 25 mL/min; monitored at 254 and 280 nm] affording 5-(3-methoxy-2-methylphenyl)pentanoic acid (2.1 g, 9.6 mmol 70%) as a white solid. <sup>1</sup>H NMR (CDCl<sub>3</sub>, 500 MHz) δ 7.42 (1H, dd, *J*=10.0 Hz, 5.0 Hz), 7.15 (1H, d, *J*= 5.0 Hz), 7.05 (1H, d, *J*=10.0 Hz), 4.15 (3H, s), 2.97 (2H, m), 2.73 (2H, t, *J*=5.0 Hz), 2.51 (3H, s), 2.06 (2H, m), 1.96 (2H, m). <sup>13</sup>C NMR (CDCl<sub>3</sub>, 125 MHz) δ 180.1, 157.7, 141.6, 125.9, 124.6, 121.6, 107.9, 55.6, 34.0, 33.2, 29.9, 24.6, 11.2.



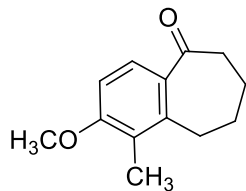

### 1,2-Dimethoxy-6,7,8,9-tetrahydro-5H-benzo[7]annulen-5-one

Eaton's reagent (42 mL) was added to 5-(3'-methoxy-2'-methylphenyl)pentanoic acid (2.1 g, 9.6 mmol). The mixture was sonicated until dissolved and stirred at room temperature for 12 h. Ice was poured into the reaction flask, and the mixture was neutralized with sat. NaHCO<sub>3</sub> and extracted with EtOAc. The organic layer was dried with Na<sub>2</sub>SO<sub>4</sub>, concentrated under reduced pressure, and purified by flash chromatography using a prepacked 100 g silica column [solvent A: EtOAc; solvent B: hexanes; gradient: 7% A/ 93% B (3 CV), 7% A/ 93% B→60% A/ 40% B (10 CV), 60% A/ 40% B (1 CV); flow rate: 25 mL/min; monitored at 254 and 280 nm] affording the ketone product (1.87 g, 9.1 mmol, 94%) as a pale yellow solid. <sup>1</sup>H NMR (CDCl<sub>3</sub>, 500 MHz) δ 7.53 (1H, d, *J* = 10.0 Hz), 6.76 (1H, d, *J* = 10.0 Hz), 3.85 (3H, s), 2.88 (2H, m), 2.65 (2H, m), 2.21 (3H, s), 1.81 (2H, m), 1.73 (2H, m). <sup>13</sup>C NMR (CDCl<sub>3</sub>, 125 MHz) δ 206.5, 160.5, 140.5, 132.7, 127.5, 123.9, 107.8, 55.6, 40.5, 27.1, 24.2, 20.6, 11.2.

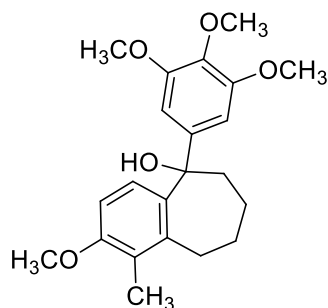

### 2-Methoxy-1-methyl-5-(3',4',5'-trimethoxyphenyl)-6,7,8,9-tetrahydro-5H-benzo[7]annulen-5-ol

5-bromo-1,2,3-trimethoxybenzene (3.39 g, 13.7 mmol) was dissolved in THF (40 mL) and cooled to -78 °C. *n*-BuLi (5.49 mL, 2.5 M) was added dropwise, and the mixture was stirred at -78° C. After 1 h, the ketone (1.87 g, 9.1 mmol) in THF was added dropwise to the reaction flask. The reaction was allowed to stir for 12 h warming to room temperature. The reaction was quenched with water (100 mL) and extracted with EtOAc. The organic layer was dried with Na<sub>2</sub>SO<sub>4</sub> and concentrated under reduced pressure. The crude product was further purified by flash chromatography using a prepacked 100 g silica column [solvent A: EtOAc; solvent B: hexanes; gradient: 10% A/ 93% B (3 CV), 10% A/ 93% B → 60% A/ 40% B (10 CV), 60% A/ 40% B (1 CV); flow rate: 25 mL/min; monitored at 254 and 280nm] affording the tertiary alcohol (2.38 g, 6.4 mmol, 70%) as a white solid. <sup>1</sup>H NMR (CDCl<sub>3</sub>, 500 MHz) δ 7.35 (1H, d, *J* = 10.0 Hz), 6.71 (1H, d, *J* = 10.0 Hz), 6.53 (2H, s), 3.84 (3H, s), 3.83 (3H, s), 3.75 (6H, s), 2.97 (2H, m), 2.55 (2H, m), 2.22 (3H, s), 1.84, (2H, m), 1.30, (2H, m). <sup>13</sup>C NMR (CDCl<sub>3</sub>, 125 MHz) δ 156.7, 153.0, 142.4, 140.7, 137.6, 137.2, 125.3, 124.0, 107.2, 104.2, 80.0, 60.8, 56.1, 55.4, 41.4, 28.5, 26.1, 25.8, 11.9.

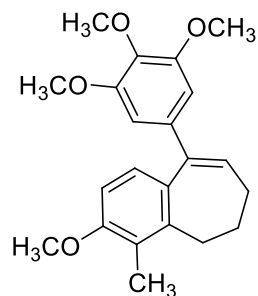

**3-Methoxy-4-methyl-9-(3',4',5'-trimethoxyphenyl)-6,7-dihydro-5H-benzo[7]annulene**

The tertiary alcohol (2.38 g, 6.4 mmol) was dissolved in acetic acid (15 mL) and stirred for 6 h. The reaction was quenched with water (100 mL) and then extracted with EtOAc. The organic phase was washed with brine, dried with Na<sub>2</sub>SO<sub>4</sub>, concentrated and purified by flash chromatography using a prepacked 100 g silica column [solvent A: EtOAc; solvent B: hexanes; gradient: 7% A/ 93% B (3 CV), 7% A/ 93% B → 60% A/ 40% B (10 CV), 60% A/ 40% B (1 CV); flow rate: 25 mL/min; monitored at 254 and 280 nm] affording **26** (1.78 g, 5.0 mmol, 78%) as a white powder. <sup>1</sup>H NMR (CDCl<sub>3</sub>, 500 MHz) δ 6.86 (1H, d, *J* = 10.0 Hz), 6.70 (1H, d, *J* = 10.0 Hz), 6.52 (2H, s), 6.32 (1H, t, *J* = 7.5 Hz), 3.86 (3H, s), 3.84 (3H, s), 3.80 (6H, s), 2.68 (2H, t, *J* = 6.5 Hz), 2.29 (3H, s), 2.12 (2H, p, *J* = 7.0 Hz), 1.91 (2H, q, *J* = 7.5 Hz). <sup>13</sup>C NMR (CDCl<sub>3</sub>, 125 MHz) δ 156.5, 152.8, 143.5, 141.7, 138.6, 137.3, 133.0, 127.4, 126.5, 123.2, 107.4, 105.3, 60.9, 56.1, 55.5, 34.0, 27.7, 25.5, 11.8. HRMS: Obsvd 355.1906 [M+H]<sup>+</sup>, calcd for C<sub>22</sub>H<sub>27</sub>O<sub>5</sub>: 355.1904. HPLC (by method B): 19.87 min.

| Compound     | Inhibition of tubulin polymerization<br>IC <sub>50</sub> (μM) ± SD | % Inhibition of colchicine binding ± SD | GI <sub>50</sub> (μM) SRB assay <sup>a</sup> |                        |                                |
|--------------|--------------------------------------------------------------------|-----------------------------------------|----------------------------------------------|------------------------|--------------------------------|
|              |                                                                    |                                         | SK-OV-3                                      | NCI-H460               | DU-145                         |
| <b>CA4</b>   | 1.0 <sup>b</sup>                                                   | 84 ± 3 (1 μM), 98 ± 0.007 (5 μM)        | 0.00455 ± 0.00211                            | 0.00223 <sup>c</sup>   | 0.00327 ± 0.00215 <sup>c</sup> |
| <b>CA4P</b>  | >40 <sup>b</sup>                                                   | nr                                      | 0.00119 ± 0.00124                            | 0.00194 <sup>c</sup>   | 0.00323 ± 0.00147 <sup>c</sup> |
| <b>KGP18</b> | 1.4 <sup>d</sup>                                                   | nr                                      | 0.0000543 <sup>c</sup>                       | 0.0000418 <sup>e</sup> | 0.0000249 <sup>c</sup>         |
| <b>28</b>    | >20                                                                | nr                                      | 32.7 ± 3.92                                  | 37.5 ± 4.21            | 89.3 ± 30.7                    |
| <b>29</b>    | 1.0 ± 0.02                                                         | 37 ± 5 (1 μM), 72 ± 0.8 (5 μM)          | 0.0516 ± 0.0315                              | 0.0527 ± 0.0184        | 0.0619 ± 0.00509               |
| <b>30</b>    | 1.6 ± 0.2                                                          | 65 ± 0.6 (5 μM)                         | 0.330 ± 0.00624                              | 0.422 ± 0.0104         | 0.644 ± 0.193                  |
| <b>31</b>    | >20                                                                | nr                                      | 0.568 ± 0.0718                               | 0.763 ± 0.130          | 1.51 ± 0.741                   |
| <b>32</b>    | >20                                                                | nr                                      | 2.96 ± 0.804                                 | 3.32 ± 0.459           | 6.03 ± 0.0974                  |
| <b>33</b>    | >20                                                                | nr                                      | 11.5 ± 5.87                                  | 16.1 ± 0.212           | 12.2 ± 7.59                    |
| <b>34</b>    | >20                                                                | nr                                      | 31.1 ± 6.20                                  | 25.5 ± 4.01            | 52.1 ± 2.96                    |
| <b>35</b>    | 3.1 ± 0.03                                                         | 30 ± 4 (5 μM), 56 ± 4 (50 μM)           | 0.277 ± 0.294                                | 0.593 ± 0.109          | 0.708 ± 0.343                  |
| <b>36</b>    | >20                                                                | nr                                      | 20.5 ± 13.6                                  | 33.4 ± 2.41            | 48.3 ± 38.3                    |
| <b>37</b>    | >20                                                                | nr                                      | 40.7 ± 11.6                                  | 57.7 ± 19.1            | 68.7 ± 18.1                    |
| <b>61</b>    | >20                                                                | nr                                      | 6.96 ± 0.503                                 | 10.5 ± 0.768           | 26.2 ± 7.83                    |
| <b>62</b>    | 1.2 ± 0.007                                                        | 36 ± 5 (1 μM), 69 ± 3 (5 μM)            | 0.0432 ± 0.00826                             | 0.120 ± 0.0179         | 0.0562 ± 0.0269                |
| <b>64</b>    | >20                                                                | nr                                      | 0.557 ± 0.0358                               | 0.652 ± 0.0543         | 4.40 ± 1.97                    |
| <b>65</b>    | 3.8 ± 0.3                                                          | 8.5 ± 4 (5 μM), 37 ± 5 (50 μM)          | 4.81 ± 1.55                                  | 4.39 ± 1.36            | 4.92 ± 0.267                   |
| <b>66</b>    | >20                                                                | nr                                      | 16.8 ± 9.60                                  | 25.0 ± 3.09            | 21.8 ± 0.607                   |
| <b>67</b>    | 7.4 ± 0.06                                                         | nr                                      | 18.4 ± 19.3                                  | 10.6 ± 5.26            | 8.59 ± 6.32                    |
| <b>68</b>    | 2.7 ± 0.1                                                          | 27 ± 5 (5 μM)                           | 0.527 ± 0.00634                              | 0.647 ± 0.0160         | 1.02 ± 0.100                   |
| <b>70</b>    | 7.7 ± 0.2                                                          | nr                                      | 0.346 ± 0.127                                | 0.691 ± 0.219          | 1.53 ± 1.02                    |

---

|    |                |                                                                     |                    |                   |                   |
|----|----------------|---------------------------------------------------------------------|--------------------|-------------------|-------------------|
| 71 | $11 \pm 0.4$   | nr                                                                  | $3.53 \pm 0.270$   | $4.24 \pm 0.208$  | $7.54 \pm 5.49$   |
| 72 | $0.70 \pm 0.1$ | $21 \pm 0.9$ (1 $\mu\text{M}$ ),<br>$67 \pm 0.6$ (5 $\mu\text{M}$ ) | $0.408 \pm 0.0883$ | $0.141 \pm 0.153$ | $0.570 \pm 0.147$ |
| 73 | >20            | nr                                                                  | $0.357 \pm 0.119$  | $0.145 \pm 0.161$ | $0.753 \pm 0.246$ |
| 74 | >20            | nr                                                                  | $17.2 \pm 4.94$    | $16.3 \pm 1.17$   | $17.5 \pm 1.55$   |

---

## Molecular docking

Discovery Studio Client 4.5 (Accelrys) was used to carry out molecular docking studies on several analogues that were active inhibitors of tubulin polymerization (compounds **29**, **62** and **72**), the lead benzosuberene compound **KGP18**, colchicine, and compound **33** ( $IC_{50} > 20 \mu M$  in the tubulin polymerization assay). The X-ray structure of *N*-deacetyl-*N*-(2-mercaptoacetyl)-colchicine (DAMA-colchicine) in the structure co-crystallized with tubulin (1SA0) was the starting structure for these studies. The protein was prepared and DAMA-colchicine was removed, and then docked (CDocker) to validate the docking procedure and parameters. There was excellent agreement between the docked and X-ray crystal structure of the ligand bound to tubulin.

The trimethoxyphenyl ring of colchicine, **KGP18** and all three active analogues was docked in a similar position to that of the trimethoxyphenyl moiety of *N*-deacetyl-*N*-(2-mercaptoacetyl)-colchicine in the structure co-crystallized with tubulin, and very close to the Cys241 residue of the beta subunit.

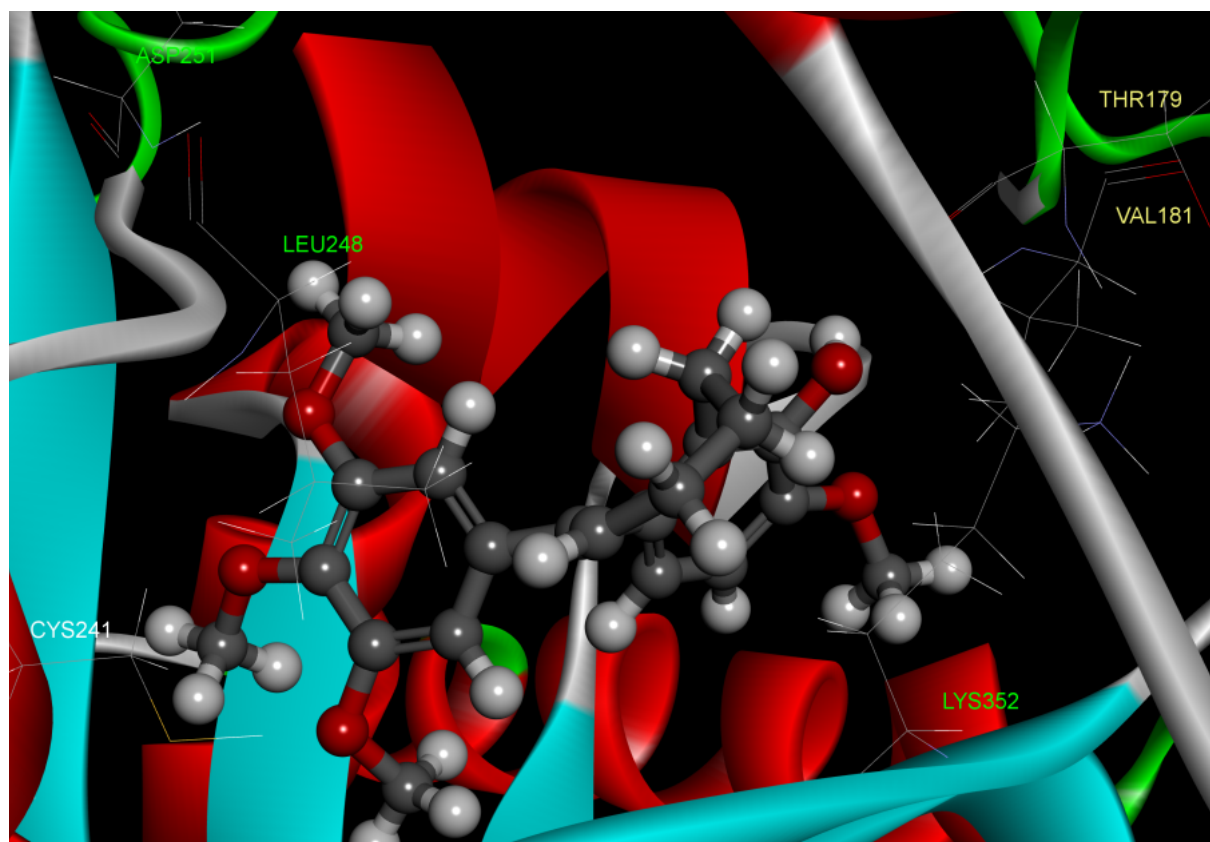

**KGP18** (ball and stick) docked at the DAMA-colchicine binding site of tubulin (1SA0). THR179 and VAL181 (on the right side of the figure) are part of the alpha subunit. All other labeled residues are found in the tubulin beta subunit.

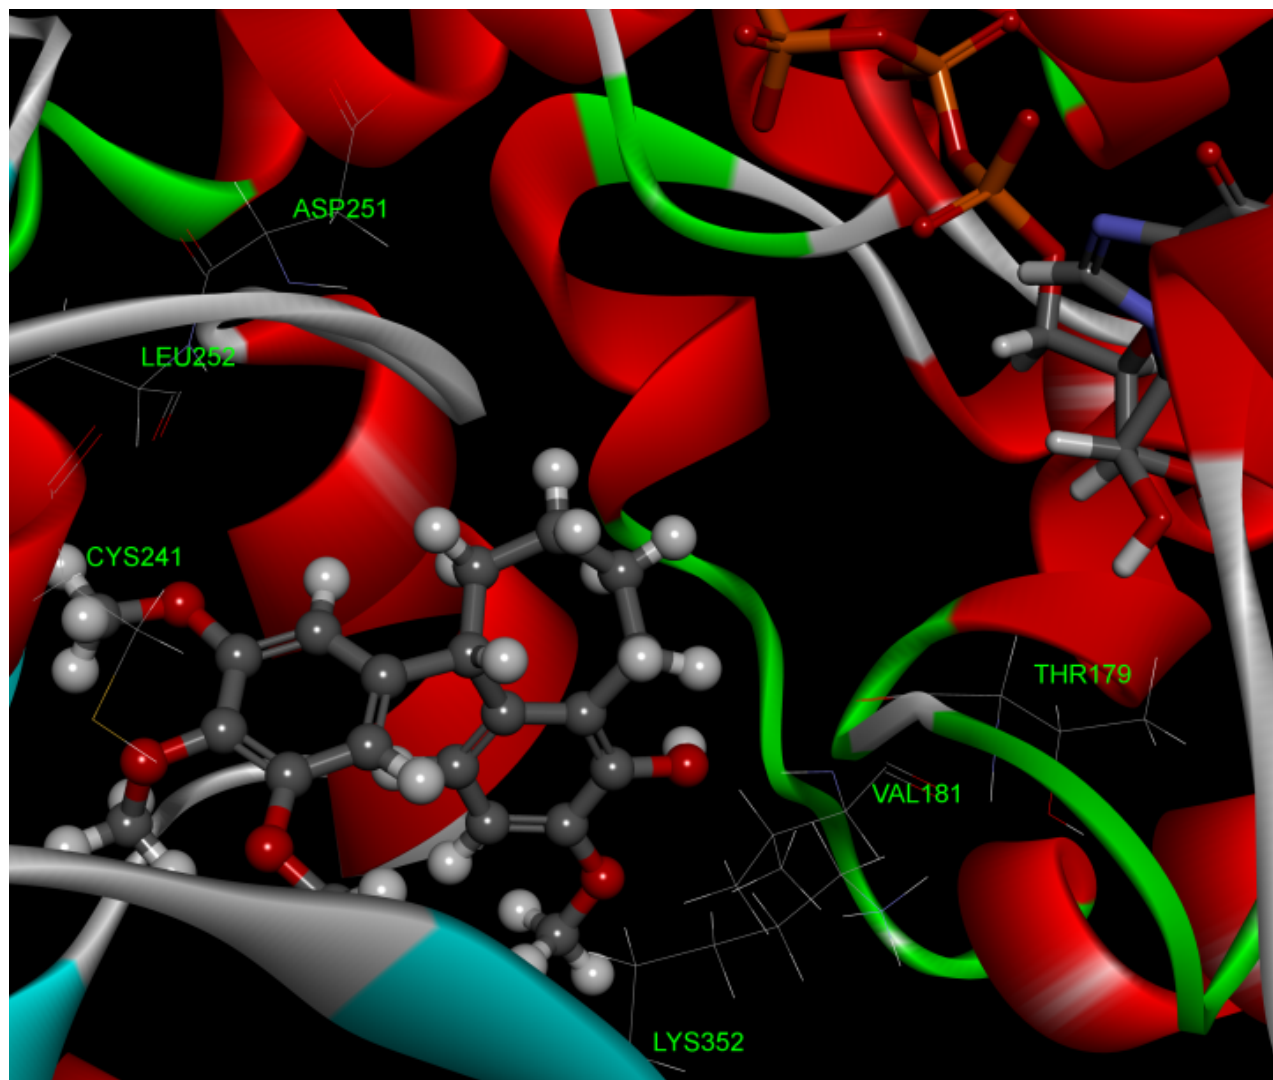

Compound **72** (ball and stick) docked at the DAMA-colchicine binding site of tubulin (1SA0). THR179 and VAL181 (on the right side of the figure) are part of the alpha subunit. All other labeled residues are found in the tubulin beta subunit.

In contrast, docking placed multiple top conformations of compound **33** ( $IC_{50} > 20 \mu M$  in the tubulin polymerization assay) with its trimethoxyphenyl ring outside of this pocket. In one top conformation shown below, the butyl chain is placed in the location of the trimethoxyphenyl ring of DAMA-colchicine, and the trimethoxyphenyl moiety of compound **33** is displaced toward the alpha subunit of tubulin.

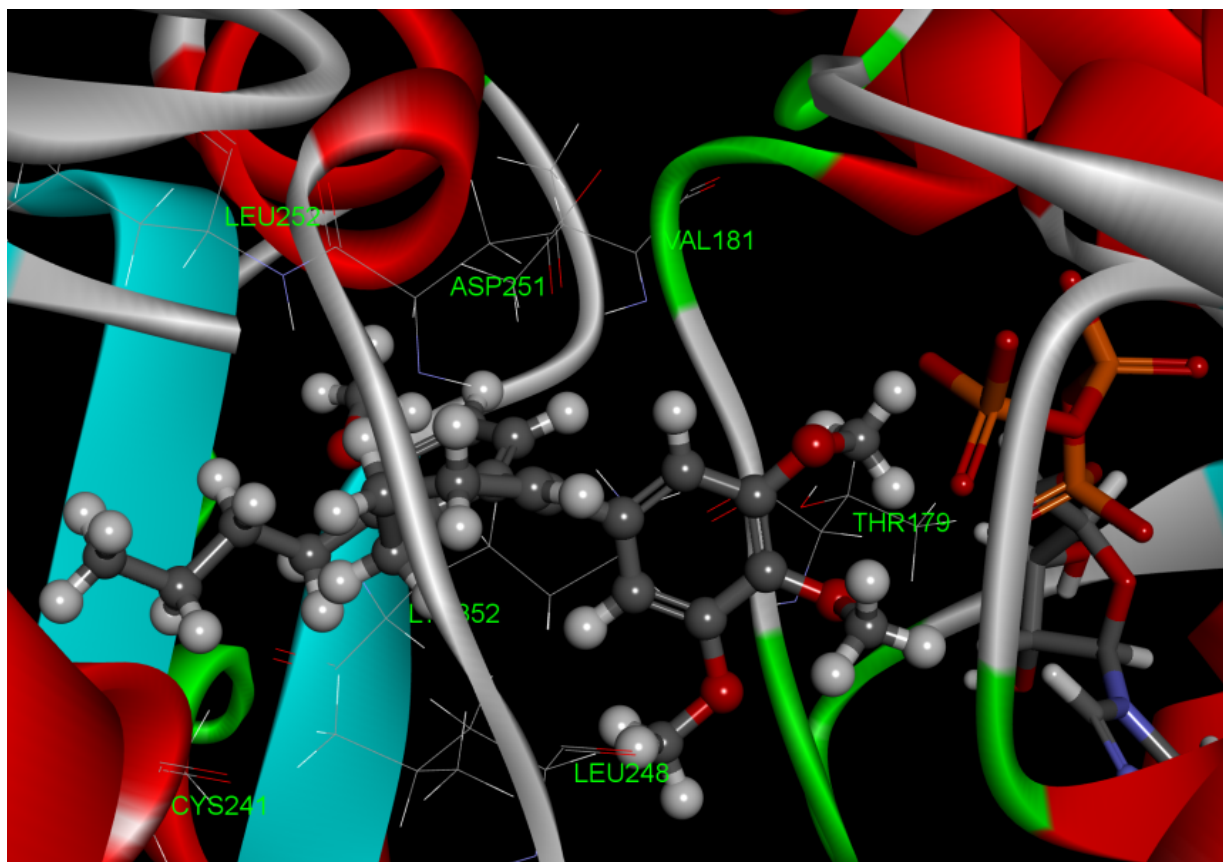

Compound **33** (ball and stick) docked at the DAMA-colchicine binding site of tubulin (1SA0). THR179 and VAL181 (on the right side of the figure) are part of the alpha subunit. All other labeled residues are found in the tubulin beta subunit.

Insight into tubulin regulation from a complex with colchicine and a stathmin-like domain.  
Ravelli, R.B., Gigant, B., Curmi, P.A., Jourdain, I., Lachkar, S., Sobel, A., Knossow, M.

(2004) *Nature* **428**: 198-202

**PubMed:** [15014504](https://pubmed.ncbi.nlm.nih.gov/15014504/)

**DOI:** [10.1038/nature02393](https://doi.org/10.1038/nature02393)
